# Supplementary material for: Copy number variation and population-specific immune genes in the model vertebrate zebrafish
Source: eLife. 2024 Jun 4;13:e98058. doi: 10.7554/eLife.98058 (PMC11192531; doi:10.7554/eLife.98058)
Supplement: Figure 2—source data 1. [file elife-98058-fig2-data1.xlsx]

## Sheet: fig2_orthocluster_counts
Population	Fish	Exon	Orthoclusters
TU	TU01	FISNACHT	238
TU	TU01	B30.2	218
TU	TU01	NLR_B30.2	68
TU	TU01	other_B30.2	150
TU	TU02	FISNACHT	229
TU	TU02	B30.2	212
TU	TU02	NLR_B30.2	73
TU	TU02	other_B30.2	139
TU	TU03	FISNACHT	246
TU	TU03	B30.2	218
TU	TU03	NLR_B30.2	76
TU	TU03	other_B30.2	142
TU	TU06	FISNACHT	264
TU	TU06	B30.2	232
TU	TU06	NLR_B30.2	73
TU	TU06	other_B30.2	159
TU	TU08	FISNACHT	120
TU	TU08	B30.2	105
TU	TU08	NLR_B30.2	35
TU	TU08	other_B30.2	70
TU	TU10	FISNACHT	126
TU	TU10	B30.2	129
TU	TU10	NLR_B30.2	45
TU	TU10	other_B30.2	84
TU	TU12	FISNACHT	78
TU	TU12	B30.2	90
TU	TU12	NLR_B30.2	28
TU	TU12	other_B30.2	62
TU	TU14	FISNACHT	112
TU	TU14	B30.2	113
TU	TU14	NLR_B30.2	35
TU	TU14	other_B30.2	78
CGN	CGN1	FISNACHT	269
CGN	CGN1	B30.2	230
CGN	CGN1	NLR_B30.2	88
CGN	CGN1	other_B30.2	142
CGN	CGN2	FISNACHT	267
CGN	CGN2	B30.2	199
CGN	CGN2	NLR_B30.2	79
CGN	CGN2	other_B30.2	120
CGN	CGN3	FISNACHT	299
CGN	CGN3	B30.2	198
CGN	CGN3	NLR_B30.2	77
CGN	CGN3	other_B30.2	121
CGN	CGN4	FISNACHT	264
CGN	CGN4	B30.2	206
CGN	CGN4	NLR_B30.2	73
CGN	CGN4	other_B30.2	133
CGN	CGN5	FISNACHT	271
CGN	CGN5	B30.2	249
CGN	CGN5	NLR_B30.2	90
CGN	CGN5	other_B30.2	159
CGN	CGN6	FISNACHT	245
CGN	CGN6	B30.2	241
CGN	CGN6	NLR_B30.2	85
CGN	CGN6	other_B30.2	156
CGN	CGN7	FISNACHT	284
CGN	CGN7	B30.2	247
CGN	CGN7	NLR_B30.2	88
CGN	CGN7	other_B30.2	159
CGN	CGN8	FISNACHT	276
CGN	CGN8	B30.2	237
CGN	CGN8	NLR_B30.2	88
CGN	CGN8	other_B30.2	149
DP	DP03	FISNACHT	61
DP	DP03	B30.2	28
DP	DP03	NLR_B30.2	12
DP	DP03	other_B30.2	16
DP	DP05	FISNACHT	278
DP	DP05	B30.2	148
DP	DP05	NLR_B30.2	57
DP	DP05	other_B30.2	91
DP	DP07	FISNACHT	336
DP	DP07	B30.2	192
DP	DP07	NLR_B30.2	75
DP	DP07	other_B30.2	117
DP	DP09	FISNACHT	285
DP	DP09	B30.2	169
DP	DP09	NLR_B30.2	67
DP	DP09	other_B30.2	102
DP	DP10	FISNACHT	286
DP	DP10	B30.2	151
DP	DP10	NLR_B30.2	60
DP	DP10	other_B30.2	91
DP	DP12	FISNACHT	294
DP	DP12	B30.2	172
DP	DP12	NLR_B30.2	60
DP	DP12	other_B30.2	112
DP	DP13	FISNACHT	258
DP	DP13	B30.2	161
DP	DP13	NLR_B30.2	71
DP	DP13	other_B30.2	90
DP	DP15	FISNACHT	250
DP	DP15	B30.2	149
DP	DP15	NLR_B30.2	51
DP	DP15	other_B30.2	98
DP	DP16	FISNACHT	298
DP	DP16	B30.2	159
DP	DP16	NLR_B30.2	65
DP	DP16	other_B30.2	94
DP	DP20	FISNACHT	435
DP	DP20	B30.2	346
DP	DP20	NLR_B30.2	134
DP	DP20	other_B30.2	212
DP	DP21	FISNACHT	279
DP	DP21	B30.2	155
DP	DP21	NLR_B30.2	61
DP	DP21	other_B30.2	94
DP	DP23	FISNACHT	282
DP	DP23	B30.2	158
DP	DP23	NLR_B30.2	61
DP	DP23	other_B30.2	97
DP	DP24	FISNACHT	261
DP	DP24	B30.2	136
DP	DP24	NLR_B30.2	55
DP	DP24	other_B30.2	81
DP	DP25	FISNACHT	252
DP	DP25	B30.2	161
DP	DP25	NLR_B30.2	63
DP	DP25	other_B30.2	98
DP	DP28	FISNACHT	328
DP	DP28	B30.2	200
DP	DP28	NLR_B30.2	79
DP	DP28	other_B30.2	121
DP	DP29	FISNACHT	289
DP	DP29	B30.2	155
DP	DP29	NLR_B30.2	61
DP	DP29	other_B30.2	94
DP	DP31	FISNACHT	260
DP	DP31	B30.2	126
DP	DP31	NLR_B30.2	48
DP	DP31	other_B30.2	78
DP	DP32	FISNACHT	309
DP	DP32	B30.2	186
DP	DP32	NLR_B30.2	76
DP	DP32	other_B30.2	110
DP	DP33	FISNACHT	235
DP	DP33	B30.2	141
DP	DP33	NLR_B30.2	55
DP	DP33	other_B30.2	86
DP	DP34	FISNACHT	201
DP	DP34	B30.2	109
DP	DP34	NLR_B30.2	46
DP	DP34	other_B30.2	63
KG	KG03	FISNACHT	485
KG	KG03	B30.2	406
KG	KG03	NLR_B30.2	159
KG	KG03	other_B30.2	247
KG	KG05	FISNACHT	444
KG	KG05	B30.2	376
KG	KG05	NLR_B30.2	161
KG	KG05	other_B30.2	215
KG	KG07	FISNACHT	518
KG	KG07	B30.2	414
KG	KG07	NLR_B30.2	180
KG	KG07	other_B30.2	234
KG	KG12	FISNACHT	382
KG	KG12	B30.2	335
KG	KG12	NLR_B30.2	137
KG	KG12	other_B30.2	198
KG	KG14	FISNACHT	402
KG	KG14	B30.2	327
KG	KG14	NLR_B30.2	143
KG	KG14	other_B30.2	184
KG	KG15	FISNACHT	408
KG	KG15	B30.2	355
KG	KG15	NLR_B30.2	137
KG	KG15	other_B30.2	218
KG	KG18	FISNACHT	477
KG	KG18	B30.2	369
KG	KG18	NLR_B30.2	162
KG	KG18	other_B30.2	207
KG	KG19	FISNACHT	351
KG	KG19	B30.2	322
KG	KG19	NLR_B30.2	118
KG	KG19	other_B30.2	204
KG	KG20	FISNACHT	431
KG	KG20	B30.2	350
KG	KG20	NLR_B30.2	141
KG	KG20	other_B30.2	209
KG	KG22	FISNACHT	429
KG	KG22	B30.2	357
KG	KG22	NLR_B30.2	147
KG	KG22	other_B30.2	210
KG	KG24	FISNACHT	448
KG	KG24	B30.2	386
KG	KG24	NLR_B30.2	164
KG	KG24	other_B30.2	222
KG	KG26	FISNACHT	445
KG	KG26	B30.2	382
KG	KG26	NLR_B30.2	154
KG	KG26	other_B30.2	228
KG	KG29	FISNACHT	464
KG	KG29	B30.2	374
KG	KG29	NLR_B30.2	161
KG	KG29	other_B30.2	213
KG	KG32	FISNACHT	454
KG	KG32	B30.2	402
KG	KG32	NLR_B30.2	160
KG	KG32	other_B30.2	242
KG	KG33	FISNACHT	496
KG	KG33	B30.2	423
KG	KG33	NLR_B30.2	180
KG	KG33	other_B30.2	243
KG	KG35	FISNACHT	282
KG	KG35	B30.2	208
KG	KG35	NLR_B30.2	75
KG	KG35	other_B30.2	133
KG	KG41	FISNACHT	231
KG	KG41	B30.2	149
KG	KG41	NLR_B30.2	60
KG	KG41	other_B30.2	89
KG	KG42	FISNACHT	223
KG	KG42	B30.2	144
KG	KG42	NLR_B30.2	61
KG	KG42	other_B30.2	83
KG	KG43	FISNACHT	280
KG	KG43	B30.2	182
KG	KG43	NLR_B30.2	73
KG	KG43	other_B30.2	109
KG	KG44	FISNACHT	365
KG	KG44	B30.2	335
KG	KG44	NLR_B30.2	129
KG	KG44	other_B30.2	206
SN	SN03	FISNACHT	521
SN	SN03	B30.2	417
SN	SN03	NLR_B30.2	153
SN	SN03	other_B30.2	264
SN	SN04	FISNACHT	399
SN	SN04	B30.2	347
SN	SN04	NLR_B30.2	126
SN	SN04	other_B30.2	221
SN	SN08	FISNACHT	385
SN	SN08	B30.2	361
SN	SN08	NLR_B30.2	143
SN	SN08	other_B30.2	218
SN	SN09	FISNACHT	405
SN	SN09	B30.2	332
SN	SN09	NLR_B30.2	120
SN	SN09	other_B30.2	212
SN	SN10	FISNACHT	456
SN	SN10	B30.2	376
SN	SN10	NLR_B30.2	142
SN	SN10	other_B30.2	234
SN	SN11	FISNACHT	396
SN	SN11	B30.2	329
SN	SN11	NLR_B30.2	121
SN	SN11	other_B30.2	208
SN	SN12	FISNACHT	344
SN	SN12	B30.2	291
SN	SN12	NLR_B30.2	108
SN	SN12	other_B30.2	183
SN	SN13	FISNACHT	534
SN	SN13	B30.2	424
SN	SN13	NLR_B30.2	169
SN	SN13	other_B30.2	255
SN	SN14	FISNACHT	468
SN	SN14	B30.2	402
SN	SN14	NLR_B30.2	146
SN	SN14	other_B30.2	256
SN	SN15	FISNACHT	562
SN	SN15	B30.2	491
SN	SN15	NLR_B30.2	187
SN	SN15	other_B30.2	304
SN	SN16	FISNACHT	543
SN	SN16	B30.2	424
SN	SN16	NLR_B30.2	160
SN	SN16	other_B30.2	264
SN	SN17	FISNACHT	399
SN	SN17	B30.2	329
SN	SN17	NLR_B30.2	129
SN	SN17	other_B30.2	200
SN	SN18	FISNACHT	443
SN	SN18	B30.2	353
SN	SN18	NLR_B30.2	118
SN	SN18	other_B30.2	235
SN	SN19	FISNACHT	450
SN	SN19	B30.2	374
SN	SN19	NLR_B30.2	128
SN	SN19	other_B30.2	246
SN	SN20	FISNACHT	491
SN	SN20	B30.2	412
SN	SN20	NLR_B30.2	144
SN	SN20	other_B30.2	268
SN	SN21	FISNACHT	335
SN	SN21	B30.2	295
SN	SN21	NLR_B30.2	102
SN	SN21	other_B30.2	193
SN	SN23	FISNACHT	378
SN	SN23	B30.2	308
SN	SN23	NLR_B30.2	113
SN	SN23	other_B30.2	195
SN	SN24	FISNACHT	524
SN	SN24	B30.2	408
SN	SN24	NLR_B30.2	153
SN	SN24	other_B30.2	255
SN	SN26	FISNACHT	358
SN	SN26	B30.2	293
SN	SN26	NLR_B30.2	109
SN	SN26	other_B30.2	184
CHT	CHT01	FISNACHT	387
CHT	CHT01	B30.2	340
CHT	CHT01	NLR_B30.2	128
CHT	CHT01	other_B30.2	212
CHT	CHT02	FISNACHT	532
CHT	CHT02	B30.2	452
CHT	CHT02	NLR_B30.2	174
CHT	CHT02	other_B30.2	278
CHT	CHT03	FISNACHT	418
CHT	CHT03	B30.2	364
CHT	CHT03	NLR_B30.2	137
CHT	CHT03	other_B30.2	227
CHT	CHT04	FISNACHT	459
CHT	CHT04	B30.2	402
CHT	CHT04	NLR_B30.2	164
CHT	CHT04	other_B30.2	238
CHT	CHT05	FISNACHT	418
CHT	CHT05	B30.2	351
CHT	CHT05	NLR_B30.2	143
CHT	CHT05	other_B30.2	208
CHT	CHT06	FISNACHT	410
CHT	CHT06	B30.2	369
CHT	CHT06	NLR_B30.2	143
CHT	CHT06	other_B30.2	226
CHT	CHT07	FISNACHT	389
CHT	CHT07	B30.2	359
CHT	CHT07	NLR_B30.2	134
CHT	CHT07	other_B30.2	225
CHT	CHT08	FISNACHT	410
CHT	CHT08	B30.2	358
CHT	CHT08	NLR_B30.2	139
CHT	CHT08	other_B30.2	219
CHT	CHT10	FISNACHT	420
CHT	CHT10	B30.2	344
CHT	CHT10	NLR_B30.2	140
CHT	CHT10	other_B30.2	204
CHT	CHT11	FISNACHT	404
CHT	CHT11	B30.2	381
CHT	CHT11	NLR_B30.2	147
CHT	CHT11	other_B30.2	234
CHT	CHT12	FISNACHT	381
CHT	CHT12	B30.2	345
CHT	CHT12	NLR_B30.2	122
CHT	CHT12	other_B30.2	223
CHT	CHT14	FISNACHT	167
CHT	CHT14	B30.2	153
CHT	CHT14	NLR_B30.2	66
CHT	CHT14	other_B30.2	87
CHT	CHT15	FISNACHT	348
CHT	CHT15	B30.2	326
CHT	CHT15	NLR_B30.2	121
CHT	CHT15	other_B30.2	205
CHT	CHT16	FISNACHT	534
CHT	CHT16	B30.2	432
CHT	CHT16	NLR_B30.2	174
CHT	CHT16	other_B30.2	258
CHT	CHT19	FISNACHT	305
CHT	CHT19	B30.2	235
CHT	CHT19	NLR_B30.2	86
CHT	CHT19	other_B30.2	149
CHT	CHT23	FISNACHT	355
CHT	CHT23	B30.2	277
CHT	CHT23	NLR_B30.2	101
CHT	CHT23	other_B30.2	176
CHT	CHT26	FISNACHT	374
CHT	CHT26	B30.2	311
CHT	CHT26	NLR_B30.2	117
CHT	CHT26	other_B30.2	194
CHT	CHT28	FISNACHT	383
CHT	CHT28	B30.2	286
CHT	CHT28	NLR_B30.2	102
CHT	CHT28	other_B30.2	184

## Sheet: fig2S1_NLRcontig_counts
Population	Fish	Domain	Contig_Count
TU	TU01	FISNACHT	264
TU	TU01	B30.2	171
TU	TU02	FISNACHT	275
TU	TU02	B30.2	148
TU	TU03	FISNACHT	304
TU	TU03	B30.2	201
TU	TU06	FISNACHT	304
TU	TU06	B30.2	268
TU	TU08	FISNACHT	8
TU	TU08	B30.2	13
TU	TU10	FISNACHT	13
TU	TU10	B30.2	22
TU	TU12	FISNACHT	6
TU	TU12	B30.2	3
TU	TU14	FISNACHT	13
TU	TU14	B30.2	20
CGN	CGN1	FISNACHT	353
CGN	CGN1	B30.2	306
CGN	CGN2	FISNACHT	336
CGN	CGN2	B30.2	180
CGN	CGN3	FISNACHT	371
CGN	CGN3	B30.2	117
CGN	CGN4	FISNACHT	391
CGN	CGN4	B30.2	256
CGN	CGN5	FISNACHT	426
CGN	CGN5	B30.2	378
CGN	CGN6	FISNACHT	395
CGN	CGN6	B30.2	377
CGN	CGN7	FISNACHT	458
CGN	CGN7	B30.2	328
CGN	CGN8	FISNACHT	533
CGN	CGN8	B30.2	392
DP	DP03	FISNACHT	2
DP	DP03	B30.2	0
DP	DP05	FISNACHT	177
DP	DP05	B30.2	37
DP	DP07	FISNACHT	249
DP	DP07	B30.2	81
DP	DP09	FISNACHT	244
DP	DP09	B30.2	97
DP	DP10	FISNACHT	190
DP	DP10	B30.2	49
DP	DP12	FISNACHT	211
DP	DP12	B30.2	55
DP	DP13	FISNACHT	224
DP	DP13	B30.2	46
DP	DP15	FISNACHT	171
DP	DP15	B30.2	71
DP	DP16	FISNACHT	298
DP	DP16	B30.2	53
DP	DP20	FISNACHT	853
DP	DP20	B30.2	931
DP	DP21	FISNACHT	332
DP	DP21	B30.2	78
DP	DP23	FISNACHT	142
DP	DP23	B30.2	60
DP	DP24	FISNACHT	121
DP	DP24	B30.2	31
DP	DP25	FISNACHT	138
DP	DP25	B30.2	50
DP	DP28	FISNACHT	390
DP	DP28	B30.2	205
DP	DP29	FISNACHT	288
DP	DP29	B30.2	42
DP	DP31	FISNACHT	128
DP	DP31	B30.2	42
DP	DP32	FISNACHT	279
DP	DP32	B30.2	77
DP	DP33	FISNACHT	142
DP	DP33	B30.2	32
DP	DP34	FISNACHT	45
DP	DP34	B30.2	8
KG	KG03	FISNACHT	596
KG	KG03	B30.2	479
KG	KG05	FISNACHT	534
KG	KG05	B30.2	538
KG	KG07	FISNACHT	529
KG	KG07	B30.2	621
KG	KG12	FISNACHT	355
KG	KG12	B30.2	449
KG	KG14	FISNACHT	413
KG	KG14	B30.2	443
KG	KG15	FISNACHT	412
KG	KG15	B30.2	410
KG	KG18	FISNACHT	573
KG	KG18	B30.2	585
KG	KG19	FISNACHT	352
KG	KG19	B30.2	369
KG	KG20	FISNACHT	457
KG	KG20	B30.2	465
KG	KG22	FISNACHT	454
KG	KG22	B30.2	580
KG	KG24	FISNACHT	508
KG	KG24	B30.2	583
KG	KG26	FISNACHT	462
KG	KG26	B30.2	450
KG	KG29	FISNACHT	581
KG	KG29	B30.2	511
KG	KG32	FISNACHT	470
KG	KG32	B30.2	385
KG	KG33	FISNACHT	620
KG	KG33	B30.2	610
KG	KG35	FISNACHT	267
KG	KG35	B30.2	124
KG	KG41	FISNACHT	107
KG	KG41	B30.2	37
KG	KG42	FISNACHT	103
KG	KG42	B30.2	21
KG	KG43	FISNACHT	215
KG	KG43	B30.2	91
KG	KG44	FISNACHT	411
KG	KG44	B30.2	345
SN	SN03	FISNACHT	730
SN	SN03	B30.2	636
SN	SN04	FISNACHT	445
SN	SN04	B30.2	384
SN	SN08	FISNACHT	358
SN	SN08	B30.2	251
SN	SN09	FISNACHT	433
SN	SN09	B30.2	351
SN	SN10	FISNACHT	833
SN	SN10	B30.2	609
SN	SN11	FISNACHT	381
SN	SN11	B30.2	297
SN	SN12	FISNACHT	290
SN	SN12	B30.2	143
SN	SN13	FISNACHT	349
SN	SN13	B30.2	237
SN	SN14	FISNACHT	463
SN	SN14	B30.2	424
SN	SN15	FISNACHT	616
SN	SN15	B30.2	487
SN	SN16	FISNACHT	541
SN	SN16	B30.2	373
SN	SN17	FISNACHT	364
SN	SN17	B30.2	324
SN	SN18	FISNACHT	514
SN	SN18	B30.2	417
SN	SN19	FISNACHT	502
SN	SN19	B30.2	477
SN	SN20	FISNACHT	623
SN	SN20	B30.2	569
SN	SN21	FISNACHT	460
SN	SN21	B30.2	378
SN	SN23	FISNACHT	743
SN	SN23	B30.2	615
SN	SN24	FISNACHT	755
SN	SN24	B30.2	656
SN	SN26	FISNACHT	521
SN	SN26	B30.2	411
CHT	CHT01	FISNACHT	507
CHT	CHT01	B30.2	571
CHT	CHT02	FISNACHT	800
CHT	CHT02	B30.2	811
CHT	CHT03	FISNACHT	743
CHT	CHT03	B30.2	638
CHT	CHT04	FISNACHT	609
CHT	CHT04	B30.2	635
CHT	CHT05	FISNACHT	590
CHT	CHT05	B30.2	593
CHT	CHT06	FISNACHT	678
CHT	CHT06	B30.2	649
CHT	CHT07	FISNACHT	411
CHT	CHT07	B30.2	526
CHT	CHT08	FISNACHT	432
CHT	CHT08	B30.2	489
CHT	CHT10	FISNACHT	451
CHT	CHT10	B30.2	569
CHT	CHT11	FISNACHT	488
CHT	CHT11	B30.2	584
CHT	CHT12	FISNACHT	432
CHT	CHT12	B30.2	500
CHT	CHT14	FISNACHT	28
CHT	CHT14	B30.2	26
CHT	CHT15	FISNACHT	368
CHT	CHT15	B30.2	392
CHT	CHT16	FISNACHT	689
CHT	CHT16	B30.2	606
CHT	CHT19	FISNACHT	324
CHT	CHT19	B30.2	170
CHT	CHT23	FISNACHT	380
CHT	CHT23	B30.2	321
CHT	CHT26	FISNACHT	419
CHT	CHT26	B30.2	509
CHT	CHT28	FISNACHT	420
CHT	CHT28	B30.2	413

## Sheet: fig2S1_NLRcontig_lengths
Population	Fish	Domain	Contig	Contig_Length
TU	TU01	FISNACHT	h1tg000001l	3915
TU	TU01	FISNACHT	h1tg000005l	5265
TU	TU01	FISNACHT	h1tg000007l	9038
TU	TU01	FISNACHT	h1tg000010l	7512
TU	TU01	FISNACHT	h1tg000013l	7474
TU	TU01	FISNACHT	h1tg000020l	4377
TU	TU01	FISNACHT	h1tg000026l	4754
TU	TU01	FISNACHT	h1tg000028l	7662
TU	TU01	FISNACHT	h1tg000030l	6048
TU	TU01	FISNACHT	h1tg000038l	5234
TU	TU01	FISNACHT	h1tg000043l	5811
TU	TU01	FISNACHT	h1tg000044l	5134
TU	TU01	FISNACHT	h1tg000045l	5165
TU	TU01	FISNACHT	h1tg000049l	6760
TU	TU01	FISNACHT	h1tg000050l	5203
TU	TU01	FISNACHT	h1tg000052l	5021
TU	TU01	FISNACHT	h1tg000053l	7190
TU	TU01	FISNACHT	h1tg000055l	5552
TU	TU01	FISNACHT	h1tg000059l	5009
TU	TU01	FISNACHT	h1tg000064l	4393
TU	TU01	FISNACHT	h1tg000065l	6130
TU	TU01	FISNACHT	h1tg000068l	5804
TU	TU01	FISNACHT	h1tg000070l	9523
TU	TU01	FISNACHT	h1tg000071l	6878
TU	TU01	FISNACHT	h1tg000078l	5731
TU	TU01	FISNACHT	h1tg000082l	8164
TU	TU01	FISNACHT	h1tg000087l	5303
TU	TU01	FISNACHT	h1tg000089l	6110
TU	TU01	FISNACHT	h1tg000093l	4042
TU	TU01	FISNACHT	h1tg000094l	6533
TU	TU01	FISNACHT	h1tg000098l	6117
TU	TU01	FISNACHT	h1tg000099l	6018
TU	TU01	FISNACHT	h1tg000100l	6949
TU	TU01	FISNACHT	h1tg000101l	4708
TU	TU01	FISNACHT	h1tg000102l	6057
TU	TU01	FISNACHT	h1tg000107l	4682
TU	TU01	FISNACHT	h1tg000108l	3923
TU	TU01	FISNACHT	h1tg000112l	7067
TU	TU01	FISNACHT	h1tg000114l	5442
TU	TU01	FISNACHT	h1tg000116l	4001
TU	TU01	FISNACHT	h1tg000117l	5993
TU	TU01	FISNACHT	h1tg000118l	7386
TU	TU01	FISNACHT	h1tg000119l	6355
TU	TU01	FISNACHT	h1tg000121l	5474
TU	TU01	FISNACHT	h1tg000125l	5347
TU	TU01	FISNACHT	h1tg000127l	5230
TU	TU01	FISNACHT	h1tg000129l	6393
TU	TU01	FISNACHT	h1tg000131l	5920
TU	TU01	FISNACHT	h1tg000132l	5648
TU	TU01	FISNACHT	h1tg000133l	6053
TU	TU01	FISNACHT	h1tg000136l	5426
TU	TU01	FISNACHT	h1tg000144l	6511
TU	TU01	FISNACHT	h1tg000149l	5395
TU	TU01	FISNACHT	h1tg000152l	6172
TU	TU01	FISNACHT	h1tg000154l	10044
TU	TU01	FISNACHT	h1tg000155l	4410
TU	TU01	FISNACHT	h1tg000156l	9147
TU	TU01	FISNACHT	h1tg000157l	8635
TU	TU01	FISNACHT	h1tg000160l	7084
TU	TU01	FISNACHT	h1tg000163l	7162
TU	TU01	FISNACHT	h1tg000169l	7287
TU	TU01	FISNACHT	h1tg000172l	6364
TU	TU01	FISNACHT	h1tg000173l	5925
TU	TU01	FISNACHT	h1tg000175l	7997
TU	TU01	FISNACHT	h1tg000177l	3238
TU	TU01	FISNACHT	h1tg000180l	4790
TU	TU01	FISNACHT	h1tg000181l	6067
TU	TU01	FISNACHT	h1tg000185l	5900
TU	TU01	FISNACHT	h1tg000186l	7007
TU	TU01	FISNACHT	h1tg000190l	4897
TU	TU01	FISNACHT	h1tg000196l	7476
TU	TU01	FISNACHT	h1tg000199l	7043
TU	TU01	FISNACHT	h1tg000203l	6247
TU	TU01	FISNACHT	h1tg000207l	8215
TU	TU01	FISNACHT	h1tg000210l	6800
TU	TU01	FISNACHT	h1tg000216l	3806
TU	TU01	FISNACHT	h1tg000218l	5087
TU	TU01	FISNACHT	h1tg000219l	12310
TU	TU01	FISNACHT	h1tg000220l	4020
TU	TU01	FISNACHT	h1tg000223l	4933
TU	TU01	FISNACHT	h1tg000226l	6507
TU	TU01	FISNACHT	h1tg000227l	4800
TU	TU01	FISNACHT	h1tg000229l	6600
TU	TU01	FISNACHT	h1tg000233l	4821
TU	TU01	FISNACHT	h1tg000235l	7039
TU	TU01	FISNACHT	h1tg000238l	10226
TU	TU01	FISNACHT	h1tg000239l	6011
TU	TU01	FISNACHT	h1tg000242l	5361
TU	TU01	FISNACHT	h1tg000245l	5251
TU	TU01	FISNACHT	h1tg000248l	6848
TU	TU01	FISNACHT	h1tg000251l	6307
TU	TU01	FISNACHT	h1tg000253l	6622
TU	TU01	FISNACHT	h1tg000257l	4976
TU	TU01	FISNACHT	h1tg000258l	7404
TU	TU01	FISNACHT	h1tg000263l	5682
TU	TU01	FISNACHT	h1tg000266l	5708
TU	TU01	FISNACHT	h1tg000274l	4585
TU	TU01	FISNACHT	h1tg000275l	5104
TU	TU01	FISNACHT	h1tg000277l	4679
TU	TU01	FISNACHT	h1tg000282l	6118
TU	TU01	FISNACHT	h1tg000289l	5778
TU	TU01	FISNACHT	h1tg000300l	4226
TU	TU01	FISNACHT	h1tg000302l	5910
TU	TU01	FISNACHT	h1tg000309l	5477
TU	TU01	FISNACHT	h1tg000316l	4843
TU	TU01	FISNACHT	h1tg000317l	7021
TU	TU01	FISNACHT	h1tg000325l	5369
TU	TU01	FISNACHT	h1tg000328l	6272
TU	TU01	FISNACHT	h1tg000330l	5049
TU	TU01	FISNACHT	h1tg000333l	6015
TU	TU01	FISNACHT	h1tg000334l	4148
TU	TU01	FISNACHT	h1tg000336l	4951
TU	TU01	FISNACHT	h1tg000338l	5867
TU	TU01	FISNACHT	h1tg000341l	5554
TU	TU01	FISNACHT	h1tg000349l	5086
TU	TU01	FISNACHT	h1tg000351l	6118
TU	TU01	FISNACHT	h1tg000353l	7325
TU	TU01	FISNACHT	h1tg000360l	5565
TU	TU01	FISNACHT	h1tg000365l	3984
TU	TU01	FISNACHT	h1tg000371l	4830
TU	TU01	FISNACHT	h1tg000374l	5505
TU	TU01	FISNACHT	h1tg000375l	5105
TU	TU01	FISNACHT	h1tg000376l	5834
TU	TU01	FISNACHT	h1tg000381l	4982
TU	TU01	FISNACHT	h1tg000386l	4446
TU	TU01	FISNACHT	h1tg000399l	5735
TU	TU01	FISNACHT	h1tg000401l	5609
TU	TU01	FISNACHT	h1tg000402l	8248
TU	TU01	FISNACHT	h1tg000405l	6598
TU	TU01	FISNACHT	h1tg000411l	4043
TU	TU01	FISNACHT	h1tg000417l	7164
TU	TU01	FISNACHT	h1tg000420l	5081
TU	TU01	FISNACHT	h1tg000428l	3866
TU	TU01	FISNACHT	h1tg000439l	4840
TU	TU01	FISNACHT	h1tg000445l	4805
TU	TU01	FISNACHT	h1tg000448l	5254
TU	TU01	FISNACHT	h1tg000449l	5543
TU	TU01	FISNACHT	h1tg000451l	3763
TU	TU01	FISNACHT	h1tg000454l	3839
TU	TU01	FISNACHT	h1tg000459l	6533
TU	TU01	FISNACHT	h2tg000002l	9038
TU	TU01	FISNACHT	h2tg000004l	7512
TU	TU01	FISNACHT	h2tg000005l	6378
TU	TU01	FISNACHT	h2tg000007l	6694
TU	TU01	FISNACHT	h2tg000008l	6390
TU	TU01	FISNACHT	h2tg000009l	5919
TU	TU01	FISNACHT	h2tg000013l	5765
TU	TU01	FISNACHT	h2tg000014l	9852
TU	TU01	FISNACHT	h2tg000016l	7662
TU	TU01	FISNACHT	h2tg000024l	6466
TU	TU01	FISNACHT	h2tg000026l	6760
TU	TU01	FISNACHT	h2tg000028l	7190
TU	TU01	FISNACHT	h2tg000029l	5552
TU	TU01	FISNACHT	h2tg000031l	6215
TU	TU01	FISNACHT	h2tg000033l	6659
TU	TU01	FISNACHT	h2tg000035l	5898
TU	TU01	FISNACHT	h2tg000036l	4572
TU	TU01	FISNACHT	h2tg000038l	6779
TU	TU01	FISNACHT	h2tg000039l	8953
TU	TU01	FISNACHT	h2tg000040l	6389
TU	TU01	FISNACHT	h2tg000041l	5873
TU	TU01	FISNACHT	h2tg000043l	7335
TU	TU01	FISNACHT	h2tg000044l	4088
TU	TU01	FISNACHT	h2tg000045l	4515
TU	TU01	FISNACHT	h2tg000047l	6184
TU	TU01	FISNACHT	h2tg000049l	9090
TU	TU01	FISNACHT	h2tg000052l	7767
TU	TU01	FISNACHT	h2tg000053l	7398
TU	TU01	FISNACHT	h2tg000054l	8067
TU	TU01	FISNACHT	h2tg000055l	6533
TU	TU01	FISNACHT	h2tg000058l	4636
TU	TU01	FISNACHT	h2tg000059l	6057
TU	TU01	FISNACHT	h2tg000062l	5210
TU	TU01	FISNACHT	h2tg000063l	7067
TU	TU01	FISNACHT	h2tg000064l	6141
TU	TU01	FISNACHT	h2tg000067l	6251
TU	TU01	FISNACHT	h2tg000068l	5993
TU	TU01	FISNACHT	h2tg000069l	5567
TU	TU01	FISNACHT	h2tg000073l	5920
TU	TU01	FISNACHT	h2tg000074l	5648
TU	TU01	FISNACHT	h2tg000075l	6053
TU	TU01	FISNACHT	h2tg000076l	5502
TU	TU01	FISNACHT	h2tg000083l	6050
TU	TU01	FISNACHT	h2tg000084l	6132
TU	TU01	FISNACHT	h2tg000085l	5272
TU	TU01	FISNACHT	h2tg000086l	10044
TU	TU01	FISNACHT	h2tg000087l	3937
TU	TU01	FISNACHT	h2tg000088l	6316
TU	TU01	FISNACHT	h2tg000089l	6787
TU	TU01	FISNACHT	h2tg000091l	5115
TU	TU01	FISNACHT	h2tg000092l	4446
TU	TU01	FISNACHT	h2tg000094l	9224
TU	TU01	FISNACHT	h2tg000095l	5439
TU	TU01	FISNACHT	h2tg000096l	7287
TU	TU01	FISNACHT	h2tg000097l	5545
TU	TU01	FISNACHT	h2tg000099l	5797
TU	TU01	FISNACHT	h2tg000100l	6729
TU	TU01	FISNACHT	h2tg000103l	8268
TU	TU01	FISNACHT	h2tg000105l	6814
TU	TU01	FISNACHT	h2tg000106l	6935
TU	TU01	FISNACHT	h2tg000108l	5114
TU	TU01	FISNACHT	h2tg000109l	5653
TU	TU01	FISNACHT	h2tg000115l	6272
TU	TU01	FISNACHT	h2tg000116l	5204
TU	TU01	FISNACHT	h2tg000117l	6633
TU	TU01	FISNACHT	h2tg000119l	6570
TU	TU01	FISNACHT	h2tg000120l	6800
TU	TU01	FISNACHT	h2tg000121l	7467
TU	TU01	FISNACHT	h2tg000122l	6255
TU	TU01	FISNACHT	h2tg000126l	5087
TU	TU01	FISNACHT	h2tg000127l	5607
TU	TU01	FISNACHT	h2tg000129l	9076
TU	TU01	FISNACHT	h2tg000130l	6246
TU	TU01	FISNACHT	h2tg000131l	8224
TU	TU01	FISNACHT	h2tg000132l	7093
TU	TU01	FISNACHT	h2tg000137l	7895
TU	TU01	FISNACHT	h2tg000138l	5396
TU	TU01	FISNACHT	h2tg000145l	5357
TU	TU01	FISNACHT	h2tg000146l	6033
TU	TU01	FISNACHT	h2tg000147l	4121
TU	TU01	FISNACHT	h2tg000149l	6304
TU	TU01	FISNACHT	h2tg000150l	5608
TU	TU01	FISNACHT	h2tg000153l	5323
TU	TU01	FISNACHT	h2tg000154l	6012
TU	TU01	FISNACHT	h2tg000155l	3489
TU	TU01	FISNACHT	h2tg000156l	9542
TU	TU01	FISNACHT	h2tg000157l	4326
TU	TU01	FISNACHT	h2tg000159l	6636
TU	TU01	FISNACHT	h2tg000161l	6440
TU	TU01	FISNACHT	h2tg000163l	5168
TU	TU01	FISNACHT	h2tg000165l	5023
TU	TU01	FISNACHT	h2tg000167l	6162
TU	TU01	FISNACHT	h2tg000168l	5149
TU	TU01	FISNACHT	h2tg000170l	4356
TU	TU01	FISNACHT	h2tg000174l	6668
TU	TU01	FISNACHT	h2tg000179l	5049
TU	TU01	FISNACHT	h2tg000180l	5946
TU	TU01	FISNACHT	h2tg000181l	8514
TU	TU01	FISNACHT	h2tg000182l	6015
TU	TU01	FISNACHT	h2tg000183l	5228
TU	TU01	FISNACHT	h2tg000184l	6810
TU	TU01	FISNACHT	h2tg000187l	5130
TU	TU01	FISNACHT	h2tg000188l	4174
TU	TU01	FISNACHT	h2tg000189l	6619
TU	TU01	FISNACHT	h2tg000191l	5657
TU	TU01	FISNACHT	h2tg000194l	5557
TU	TU01	FISNACHT	h2tg000197l	6048
TU	TU01	FISNACHT	h2tg000198l	4467
TU	TU01	FISNACHT	h2tg000199l	5535
TU	TU01	FISNACHT	h2tg000201l	6508
TU	TU01	FISNACHT	h2tg000202l	5668
TU	TU01	FISNACHT	h2tg000203l	6895
TU	TU01	FISNACHT	h2tg000204l	4905
TU	TU01	FISNACHT	h2tg000205l	5604
TU	TU01	FISNACHT	h2tg000206l	5133
TU	TU01	FISNACHT	h2tg000207l	6351
TU	TU01	FISNACHT	h2tg000208l	4924
TU	TU01	FISNACHT	h2tg000209l	3973
TU	TU01	FISNACHT	h2tg000212l	6598
TU	TU01	FISNACHT	h2tg000213l	4454
TU	TU01	FISNACHT	h2tg000216l	7164
TU	TU01	FISNACHT	h2tg000217l	6050
TU	TU01	FISNACHT	h2tg000219l	4502
TU	TU01	FISNACHT	h2tg000220l	3285
TU	TU02	FISNACHT	h1tg000001l	6534
TU	TU02	FISNACHT	h1tg000002l	4384
TU	TU02	FISNACHT	h1tg000005l	9630
TU	TU02	FISNACHT	h1tg000007l	6642
TU	TU02	FISNACHT	h1tg000019l	5415
TU	TU02	FISNACHT	h1tg000021l	6725
TU	TU02	FISNACHT	h1tg000026l	5403
TU	TU02	FISNACHT	h1tg000027l	5133
TU	TU02	FISNACHT	h1tg000028l	5493
TU	TU02	FISNACHT	h1tg000029l	4152
TU	TU02	FISNACHT	h1tg000030l	6524
TU	TU02	FISNACHT	h1tg000036l	5255
TU	TU02	FISNACHT	h1tg000038l	10275
TU	TU02	FISNACHT	h1tg000040l	5819
TU	TU02	FISNACHT	h1tg000044l	7777
TU	TU02	FISNACHT	h1tg000048l	6748
TU	TU02	FISNACHT	h1tg000049l	5398
TU	TU02	FISNACHT	h1tg000050l	5878
TU	TU02	FISNACHT	h1tg000056l	5567
TU	TU02	FISNACHT	h1tg000059l	4902
TU	TU02	FISNACHT	h1tg000061l	7392
TU	TU02	FISNACHT	h1tg000062l	4510
TU	TU02	FISNACHT	h1tg000063l	7115
TU	TU02	FISNACHT	h1tg000064l	6659
TU	TU02	FISNACHT	h1tg000069l	6522
TU	TU02	FISNACHT	h1tg000070l	5207
TU	TU02	FISNACHT	h1tg000071l	6572
TU	TU02	FISNACHT	h1tg000075l	5337
TU	TU02	FISNACHT	h1tg000083l	6831
TU	TU02	FISNACHT	h1tg000084l	6760
TU	TU02	FISNACHT	h1tg000086l	6256
TU	TU02	FISNACHT	h1tg000087l	5318
TU	TU02	FISNACHT	h1tg000089l	5052
TU	TU02	FISNACHT	h1tg000091l	5415
TU	TU02	FISNACHT	h1tg000093l	5531
TU	TU02	FISNACHT	h1tg000094l	5600
TU	TU02	FISNACHT	h1tg000097l	6794
TU	TU02	FISNACHT	h1tg000103l	5004
TU	TU02	FISNACHT	h1tg000104l	4932
TU	TU02	FISNACHT	h1tg000105l	7783
TU	TU02	FISNACHT	h1tg000110l	8798
TU	TU02	FISNACHT	h1tg000112l	5425
TU	TU02	FISNACHT	h1tg000114l	4908
TU	TU02	FISNACHT	h1tg000118l	4919
TU	TU02	FISNACHT	h1tg000121l	5587
TU	TU02	FISNACHT	h1tg000124l	4722
TU	TU02	FISNACHT	h1tg000125l	9901
TU	TU02	FISNACHT	h1tg000126l	5567
TU	TU02	FISNACHT	h1tg000130l	6832
TU	TU02	FISNACHT	h1tg000134l	6010
TU	TU02	FISNACHT	h1tg000136l	4215
TU	TU02	FISNACHT	h1tg000142l	5528
TU	TU02	FISNACHT	h1tg000153l	5070
TU	TU02	FISNACHT	h1tg000162l	7000
TU	TU02	FISNACHT	h1tg000163l	5898
TU	TU02	FISNACHT	h1tg000164l	5040
TU	TU02	FISNACHT	h1tg000165l	3681
TU	TU02	FISNACHT	h1tg000166l	5365
TU	TU02	FISNACHT	h1tg000171l	5223
TU	TU02	FISNACHT	h1tg000173l	6507
TU	TU02	FISNACHT	h1tg000174l	4907
TU	TU02	FISNACHT	h1tg000183l	5367
TU	TU02	FISNACHT	h1tg000186l	5515
TU	TU02	FISNACHT	h1tg000188l	6505
TU	TU02	FISNACHT	h1tg000190l	6911
TU	TU02	FISNACHT	h1tg000192l	6524
TU	TU02	FISNACHT	h1tg000196l	4415
TU	TU02	FISNACHT	h1tg000197l	6752
TU	TU02	FISNACHT	h1tg000202l	3811
TU	TU02	FISNACHT	h1tg000209l	7373
TU	TU02	FISNACHT	h1tg000210l	6775
TU	TU02	FISNACHT	h1tg000212l	6191
TU	TU02	FISNACHT	h1tg000215l	7377
TU	TU02	FISNACHT	h1tg000216l	7457
TU	TU02	FISNACHT	h1tg000220l	6234
TU	TU02	FISNACHT	h1tg000223l	8108
TU	TU02	FISNACHT	h1tg000226l	6267
TU	TU02	FISNACHT	h1tg000227l	5678
TU	TU02	FISNACHT	h1tg000228l	5018
TU	TU02	FISNACHT	h1tg000235l	5298
TU	TU02	FISNACHT	h1tg000241l	6300
TU	TU02	FISNACHT	h1tg000242l	4701
TU	TU02	FISNACHT	h1tg000243l	5275
TU	TU02	FISNACHT	h1tg000245l	4730
TU	TU02	FISNACHT	h1tg000246l	5590
TU	TU02	FISNACHT	h1tg000247l	5512
TU	TU02	FISNACHT	h1tg000249l	5238
TU	TU02	FISNACHT	h1tg000250l	5213
TU	TU02	FISNACHT	h1tg000252l	6885
TU	TU02	FISNACHT	h1tg000254l	6740
TU	TU02	FISNACHT	h1tg000259l	6102
TU	TU02	FISNACHT	h1tg000261l	7696
TU	TU02	FISNACHT	h1tg000265l	3689
TU	TU02	FISNACHT	h1tg000267l	5165
TU	TU02	FISNACHT	h1tg000271l	6172
TU	TU02	FISNACHT	h1tg000272l	4756
TU	TU02	FISNACHT	h1tg000276l	6628
TU	TU02	FISNACHT	h1tg000282l	6204
TU	TU02	FISNACHT	h1tg000283l	5344
TU	TU02	FISNACHT	h1tg000284l	4956
TU	TU02	FISNACHT	h1tg000286l	4949
TU	TU02	FISNACHT	h1tg000289l	5294
TU	TU02	FISNACHT	h1tg000293l	6646
TU	TU02	FISNACHT	h1tg000294l	6182
TU	TU02	FISNACHT	h1tg000295l	6122
TU	TU02	FISNACHT	h1tg000296l	5502
TU	TU02	FISNACHT	h1tg000297l	7165
TU	TU02	FISNACHT	h1tg000299l	5733
TU	TU02	FISNACHT	h1tg000303l	6029
TU	TU02	FISNACHT	h1tg000304l	5153
TU	TU02	FISNACHT	h1tg000305l	5729
TU	TU02	FISNACHT	h1tg000309l	5539
TU	TU02	FISNACHT	h1tg000313l	7006
TU	TU02	FISNACHT	h1tg000317l	6342
TU	TU02	FISNACHT	h1tg000318l	4538
TU	TU02	FISNACHT	h1tg000322l	4074
TU	TU02	FISNACHT	h1tg000323l	5532
TU	TU02	FISNACHT	h1tg000325l	5182
TU	TU02	FISNACHT	h1tg000327l	3866
TU	TU02	FISNACHT	h1tg000337l	4899
TU	TU02	FISNACHT	h1tg000339l	5439
TU	TU02	FISNACHT	h1tg000342l	4915
TU	TU02	FISNACHT	h1tg000343l	5445
TU	TU02	FISNACHT	h1tg000345l	5442
TU	TU02	FISNACHT	h1tg000348l	5688
TU	TU02	FISNACHT	h1tg000355l	6058
TU	TU02	FISNACHT	h1tg000363l	4538
TU	TU02	FISNACHT	h1tg000364l	5633
TU	TU02	FISNACHT	h1tg000367l	5553
TU	TU02	FISNACHT	h1tg000373l	6138
TU	TU02	FISNACHT	h1tg000374l	3605
TU	TU02	FISNACHT	h1tg000377l	6149
TU	TU02	FISNACHT	h1tg000378l	5607
TU	TU02	FISNACHT	h1tg000382l	5749
TU	TU02	FISNACHT	h1tg000384l	5929
TU	TU02	FISNACHT	h1tg000389l	6432
TU	TU02	FISNACHT	h1tg000390l	3549
TU	TU02	FISNACHT	h1tg000391l	11568
TU	TU02	FISNACHT	h1tg000397l	4279
TU	TU02	FISNACHT	h1tg000398l	5173
TU	TU02	FISNACHT	h1tg000402l	5626
TU	TU02	FISNACHT	h1tg000409l	4740
TU	TU02	FISNACHT	h1tg000410l	5305
TU	TU02	FISNACHT	h1tg000418l	4849
TU	TU02	FISNACHT	h1tg000419l	7474
TU	TU02	FISNACHT	h1tg000421l	6776
TU	TU02	FISNACHT	h1tg000428l	6300
TU	TU02	FISNACHT	h1tg000434l	6044
TU	TU02	FISNACHT	h1tg000437l	4039
TU	TU02	FISNACHT	h2tg000004l	6360
TU	TU02	FISNACHT	h2tg000005l	5638
TU	TU02	FISNACHT	h2tg000006l	4258
TU	TU02	FISNACHT	h2tg000007l	6642
TU	TU02	FISNACHT	h2tg000008l	5946
TU	TU02	FISNACHT	h2tg000012l	5520
TU	TU02	FISNACHT	h2tg000013l	6725
TU	TU02	FISNACHT	h2tg000014l	6212
TU	TU02	FISNACHT	h2tg000015l	8359
TU	TU02	FISNACHT	h2tg000016l	4192
TU	TU02	FISNACHT	h2tg000018l	6568
TU	TU02	FISNACHT	h2tg000019l	4152
TU	TU02	FISNACHT	h2tg000020l	6524
TU	TU02	FISNACHT	h2tg000021l	5255
TU	TU02	FISNACHT	h2tg000023l	6633
TU	TU02	FISNACHT	h2tg000026l	5017
TU	TU02	FISNACHT	h2tg000029l	7777
TU	TU02	FISNACHT	h2tg000030l	5160
TU	TU02	FISNACHT	h2tg000031l	6748
TU	TU02	FISNACHT	h2tg000032l	5398
TU	TU02	FISNACHT	h2tg000033l	5878
TU	TU02	FISNACHT	h2tg000034l	8944
TU	TU02	FISNACHT	h2tg000036l	7901
TU	TU02	FISNACHT	h2tg000037l	4902
TU	TU02	FISNACHT	h2tg000038l	7392
TU	TU02	FISNACHT	h2tg000039l	6189
TU	TU02	FISNACHT	h2tg000041l	4472
TU	TU02	FISNACHT	h2tg000042l	5702
TU	TU02	FISNACHT	h2tg000043l	5207
TU	TU02	FISNACHT	h2tg000044l	6572
TU	TU02	FISNACHT	h2tg000045l	5238
TU	TU02	FISNACHT	h2tg000047l	6760
TU	TU02	FISNACHT	h2tg000048l	5122
TU	TU02	FISNACHT	h2tg000049l	5502
TU	TU02	FISNACHT	h2tg000050l	5415
TU	TU02	FISNACHT	h2tg000052l	6531
TU	TU02	FISNACHT	h2tg000053l	6056
TU	TU02	FISNACHT	h2tg000055l	6271
TU	TU02	FISNACHT	h2tg000057l	6425
TU	TU02	FISNACHT	h2tg000058l	3753
TU	TU02	FISNACHT	h2tg000061l	8798
TU	TU02	FISNACHT	h2tg000062l	5425
TU	TU02	FISNACHT	h2tg000063l	5646
TU	TU02	FISNACHT	h2tg000064l	4722
TU	TU02	FISNACHT	h2tg000065l	9901
TU	TU02	FISNACHT	h2tg000066l	5293
TU	TU02	FISNACHT	h2tg000067l	5567
TU	TU02	FISNACHT	h2tg000069l	6395
TU	TU02	FISNACHT	h2tg000071l	4718
TU	TU02	FISNACHT	h2tg000072l	4137
TU	TU02	FISNACHT	h2tg000073l	6010
TU	TU02	FISNACHT	h2tg000075l	6289
TU	TU02	FISNACHT	h2tg000078l	5349
TU	TU02	FISNACHT	h2tg000080l	4499
TU	TU02	FISNACHT	h2tg000084l	5332
TU	TU02	FISNACHT	h2tg000085l	5867
TU	TU02	FISNACHT	h2tg000086l	5719
TU	TU02	FISNACHT	h2tg000092l	5365
TU	TU02	FISNACHT	h2tg000095l	6507
TU	TU02	FISNACHT	h2tg000096l	6246
TU	TU02	FISNACHT	h2tg000100l	5367
TU	TU02	FISNACHT	h2tg000102l	5515
TU	TU02	FISNACHT	h2tg000103l	5350
TU	TU02	FISNACHT	h2tg000104l	6911
TU	TU02	FISNACHT	h2tg000105l	6524
TU	TU02	FISNACHT	h2tg000106l	5820
TU	TU02	FISNACHT	h2tg000107l	6658
TU	TU02	FISNACHT	h2tg000109l	4614
TU	TU02	FISNACHT	h2tg000114l	7373
TU	TU02	FISNACHT	h2tg000115l	6113
TU	TU02	FISNACHT	h2tg000116l	7377
TU	TU02	FISNACHT	h2tg000117l	7457
TU	TU02	FISNACHT	h2tg000118l	5900
TU	TU02	FISNACHT	h2tg000119l	7326
TU	TU02	FISNACHT	h2tg000123l	6620
TU	TU02	FISNACHT	h2tg000131l	4800
TU	TU02	FISNACHT	h2tg000132l	6901
TU	TU02	FISNACHT	h2tg000136l	4359
TU	TU02	FISNACHT	h2tg000137l	5782
TU	TU02	FISNACHT	h2tg000139l	6574
TU	TU02	FISNACHT	h2tg000140l	6628
TU	TU02	FISNACHT	h2tg000141l	4758
TU	TU02	FISNACHT	h2tg000142l	5497
TU	TU02	FISNACHT	h2tg000143l	4949
TU	TU02	FISNACHT	h2tg000146l	5790
TU	TU02	FISNACHT	h2tg000147l	4280
TU	TU02	FISNACHT	h2tg000148l	4202
TU	TU02	FISNACHT	h2tg000149l	6465
TU	TU02	FISNACHT	h2tg000151l	3895
TU	TU02	FISNACHT	h2tg000158l	5670
TU	TU02	FISNACHT	h2tg000159l	5618
TU	TU02	FISNACHT	h2tg000160l	6647
TU	TU02	FISNACHT	h2tg000161l	5296
TU	TU02	FISNACHT	h2tg000164l	5987
TU	TU02	FISNACHT	h2tg000165l	5270
TU	TU02	FISNACHT	h2tg000167l	5442
TU	TU02	FISNACHT	h2tg000168l	4544
TU	TU02	FISNACHT	h2tg000172l	5008
TU	TU02	FISNACHT	h2tg000175l	4915
TU	TU02	FISNACHT	h2tg000176l	6138
TU	TU02	FISNACHT	h2tg000178l	5031
TU	TU02	FISNACHT	h2tg000179l	5208
TU	TU02	FISNACHT	h2tg000180l	6149
TU	TU02	FISNACHT	h2tg000181l	5656
TU	TU02	FISNACHT	h2tg000182l	5598
TU	TU02	FISNACHT	h2tg000183l	4867
TU	TU02	FISNACHT	h2tg000184l	4807
TU	TU02	FISNACHT	h2tg000185l	4335
TU	TU02	FISNACHT	h2tg000186l	4128
TU	TU02	FISNACHT	h2tg000187l	3704
TU	TU02	FISNACHT	h2tg000188l	5869
TU	TU02	FISNACHT	h2tg000189l	6002
TU	TU02	FISNACHT	h2tg000190l	4766
TU	TU02	FISNACHT	h2tg000191l	4837
TU	TU02	FISNACHT	h2tg000192l	4826
TU	TU02	FISNACHT	h2tg000193l	3398
TU	TU02	FISNACHT	h2tg000195l	5173
TU	TU02	FISNACHT	h2tg000196l	6106
TU	TU02	FISNACHT	h2tg000197l	5891
TU	TU02	FISNACHT	h2tg000198l	4549
TU	TU02	FISNACHT	h2tg000200l	7474
TU	TU02	FISNACHT	h2tg000201l	3752
TU	TU02	FISNACHT	h2tg000203l	4784
TU	TU02	FISNACHT	h2tg000204l	6310
TU	TU02	FISNACHT	h2tg000205l	6161
TU	TU02	FISNACHT	h2tg000206l	5592
TU	TU03	FISNACHT	h1tg000001l	6602
TU	TU03	FISNACHT	h1tg000002l	6507
TU	TU03	FISNACHT	h1tg000003l	6186
TU	TU03	FISNACHT	h1tg000015l	4856
TU	TU03	FISNACHT	h1tg000017l	6352
TU	TU03	FISNACHT	h1tg000019l	4707
TU	TU03	FISNACHT	h1tg000020l	9587
TU	TU03	FISNACHT	h1tg000024l	7789
TU	TU03	FISNACHT	h1tg000031l	5012
TU	TU03	FISNACHT	h1tg000035l	6247
TU	TU03	FISNACHT	h1tg000039l	4910
TU	TU03	FISNACHT	h1tg000041l	4268
TU	TU03	FISNACHT	h1tg000045l	5758
TU	TU03	FISNACHT	h1tg000046l	5548
TU	TU03	FISNACHT	h1tg000048l	5400
TU	TU03	FISNACHT	h1tg000050l	4355
TU	TU03	FISNACHT	h1tg000053l	6640
TU	TU03	FISNACHT	h1tg000057l	4344
TU	TU03	FISNACHT	h1tg000061l	5269
TU	TU03	FISNACHT	h1tg000068l	5112
TU	TU03	FISNACHT	h1tg000071l	5300
TU	TU03	FISNACHT	h1tg000073l	4114
TU	TU03	FISNACHT	h1tg000074l	6189
TU	TU03	FISNACHT	h1tg000075l	6778
TU	TU03	FISNACHT	h1tg000079l	8574
TU	TU03	FISNACHT	h1tg000081l	5179
TU	TU03	FISNACHT	h1tg000084l	4827
TU	TU03	FISNACHT	h1tg000088l	6503
TU	TU03	FISNACHT	h1tg000090l	8043
TU	TU03	FISNACHT	h1tg000092l	4754
TU	TU03	FISNACHT	h1tg000093l	6055
TU	TU03	FISNACHT	h1tg000101l	6492
TU	TU03	FISNACHT	h1tg000102l	5084
TU	TU03	FISNACHT	h1tg000105l	7026
TU	TU03	FISNACHT	h1tg000106l	4521
TU	TU03	FISNACHT	h1tg000109l	7252
TU	TU03	FISNACHT	h1tg000111l	5808
TU	TU03	FISNACHT	h1tg000113l	5449
TU	TU03	FISNACHT	h1tg000114l	7826
TU	TU03	FISNACHT	h1tg000115l	6231
TU	TU03	FISNACHT	h1tg000117l	5307
TU	TU03	FISNACHT	h1tg000120l	4511
TU	TU03	FISNACHT	h1tg000121l	5947
TU	TU03	FISNACHT	h1tg000126l	6402
TU	TU03	FISNACHT	h1tg000127l	6267
TU	TU03	FISNACHT	h1tg000128l	6491
TU	TU03	FISNACHT	h1tg000130l	5670
TU	TU03	FISNACHT	h1tg000135l	6461
TU	TU03	FISNACHT	h1tg000142l	5525
TU	TU03	FISNACHT	h1tg000143l	6673
TU	TU03	FISNACHT	h1tg000144l	4966
TU	TU03	FISNACHT	h1tg000152l	5854
TU	TU03	FISNACHT	h1tg000153l	5338
TU	TU03	FISNACHT	h1tg000163l	6360
TU	TU03	FISNACHT	h1tg000168l	4821
TU	TU03	FISNACHT	h1tg000169l	5987
TU	TU03	FISNACHT	h1tg000177l	6323
TU	TU03	FISNACHT	h1tg000180l	6190
TU	TU03	FISNACHT	h1tg000190l	4535
TU	TU03	FISNACHT	h1tg000192l	5921
TU	TU03	FISNACHT	h1tg000193l	4883
TU	TU03	FISNACHT	h1tg000196l	3593
TU	TU03	FISNACHT	h1tg000198l	6032
TU	TU03	FISNACHT	h1tg000199l	5860
TU	TU03	FISNACHT	h1tg000200l	4077
TU	TU03	FISNACHT	h1tg000201l	6726
TU	TU03	FISNACHT	h1tg000205l	6402
TU	TU03	FISNACHT	h1tg000206l	4818
TU	TU03	FISNACHT	h1tg000208l	6190
TU	TU03	FISNACHT	h1tg000209l	6289
TU	TU03	FISNACHT	h1tg000211l	4809
TU	TU03	FISNACHT	h1tg000216l	6100
TU	TU03	FISNACHT	h1tg000225l	6684
TU	TU03	FISNACHT	h1tg000226l	5096
TU	TU03	FISNACHT	h1tg000229l	6312
TU	TU03	FISNACHT	h1tg000235l	7307
TU	TU03	FISNACHT	h1tg000239l	5957
TU	TU03	FISNACHT	h1tg000241l	7685
TU	TU03	FISNACHT	h1tg000244l	3842
TU	TU03	FISNACHT	h1tg000254l	5824
TU	TU03	FISNACHT	h1tg000256l	5548
TU	TU03	FISNACHT	h1tg000259l	4300
TU	TU03	FISNACHT	h1tg000262l	4750
TU	TU03	FISNACHT	h1tg000264l	4830
TU	TU03	FISNACHT	h1tg000267l	5611
TU	TU03	FISNACHT	h1tg000270l	5368
TU	TU03	FISNACHT	h1tg000272l	4611
TU	TU03	FISNACHT	h1tg000275l	8121
TU	TU03	FISNACHT	h1tg000278l	5130
TU	TU03	FISNACHT	h1tg000282l	4348
TU	TU03	FISNACHT	h1tg000284l	5981
TU	TU03	FISNACHT	h1tg000289l	4841
TU	TU03	FISNACHT	h1tg000290l	5573
TU	TU03	FISNACHT	h1tg000303l	5662
TU	TU03	FISNACHT	h1tg000306l	8843
TU	TU03	FISNACHT	h1tg000307l	5318
TU	TU03	FISNACHT	h1tg000315l	6271
TU	TU03	FISNACHT	h1tg000321l	4578
TU	TU03	FISNACHT	h1tg000325l	5238
TU	TU03	FISNACHT	h1tg000327l	5429
TU	TU03	FISNACHT	h1tg000328l	5299
TU	TU03	FISNACHT	h1tg000333l	5501
TU	TU03	FISNACHT	h1tg000334l	6284
TU	TU03	FISNACHT	h1tg000337l	6379
TU	TU03	FISNACHT	h1tg000341l	5420
TU	TU03	FISNACHT	h1tg000345l	6470
TU	TU03	FISNACHT	h1tg000348l	3770
TU	TU03	FISNACHT	h1tg000350l	5124
TU	TU03	FISNACHT	h1tg000353l	4981
TU	TU03	FISNACHT	h1tg000354l	3192
TU	TU03	FISNACHT	h1tg000361l	5186
TU	TU03	FISNACHT	h1tg000362l	6266
TU	TU03	FISNACHT	h1tg000363l	5015
TU	TU03	FISNACHT	h1tg000371l	3629
TU	TU03	FISNACHT	h1tg000375l	5847
TU	TU03	FISNACHT	h1tg000376l	4457
TU	TU03	FISNACHT	h1tg000378l	6666
TU	TU03	FISNACHT	h1tg000393l	5380
TU	TU03	FISNACHT	h1tg000394l	5479
TU	TU03	FISNACHT	h1tg000395l	6362
TU	TU03	FISNACHT	h1tg000398l	4402
TU	TU03	FISNACHT	h1tg000400l	5379
TU	TU03	FISNACHT	h1tg000404l	6249
TU	TU03	FISNACHT	h1tg000408l	5697
TU	TU03	FISNACHT	h1tg000411l	4724
TU	TU03	FISNACHT	h1tg000412l	6482
TU	TU03	FISNACHT	h1tg000414l	5795
TU	TU03	FISNACHT	h1tg000417l	6122
TU	TU03	FISNACHT	h1tg000419l	4727
TU	TU03	FISNACHT	h1tg000420l	6022
TU	TU03	FISNACHT	h1tg000424l	4380
TU	TU03	FISNACHT	h1tg000425l	4331
TU	TU03	FISNACHT	h1tg000430l	4785
TU	TU03	FISNACHT	h1tg000437l	3266
TU	TU03	FISNACHT	h1tg000444l	5883
TU	TU03	FISNACHT	h1tg000445l	5626
TU	TU03	FISNACHT	h1tg000446l	7833
TU	TU03	FISNACHT	h1tg000448l	6150
TU	TU03	FISNACHT	h1tg000452l	4611
TU	TU03	FISNACHT	h1tg000455l	5575
TU	TU03	FISNACHT	h1tg000466l	6310
TU	TU03	FISNACHT	h1tg000469l	4852
TU	TU03	FISNACHT	h1tg000470l	5723
TU	TU03	FISNACHT	h1tg000474l	3709
TU	TU03	FISNACHT	h1tg000478l	6342
TU	TU03	FISNACHT	h1tg000479l	4466
TU	TU03	FISNACHT	h1tg000487l	6791
TU	TU03	FISNACHT	h1tg000488l	5250
TU	TU03	FISNACHT	h1tg000493l	5266
TU	TU03	FISNACHT	h1tg000495l	4555
TU	TU03	FISNACHT	h1tg000505l	4477
TU	TU03	FISNACHT	h1tg000513l	4814
TU	TU03	FISNACHT	h1tg000515l	2945
TU	TU03	FISNACHT	h1tg000529l	4314
TU	TU03	FISNACHT	h1tg000535l	4999
TU	TU03	FISNACHT	h1tg000537l	5466
TU	TU03	FISNACHT	h1tg000544l	5355
TU	TU03	FISNACHT	h1tg000545l	5606
TU	TU03	FISNACHT	h1tg000547l	5499
TU	TU03	FISNACHT	h2tg000001l	5097
TU	TU03	FISNACHT	h2tg000002l	5544
TU	TU03	FISNACHT	h2tg000005l	5292
TU	TU03	FISNACHT	h2tg000009l	4856
TU	TU03	FISNACHT	h2tg000010l	5297
TU	TU03	FISNACHT	h2tg000011l	5058
TU	TU03	FISNACHT	h2tg000012l	4320
TU	TU03	FISNACHT	h2tg000014l	6352
TU	TU03	FISNACHT	h2tg000016l	7789
TU	TU03	FISNACHT	h2tg000018l	6276
TU	TU03	FISNACHT	h2tg000019l	6060
TU	TU03	FISNACHT	h2tg000022l	6505
TU	TU03	FISNACHT	h2tg000023l	5502
TU	TU03	FISNACHT	h2tg000025l	6640
TU	TU03	FISNACHT	h2tg000027l	4344
TU	TU03	FISNACHT	h2tg000028l	4573
TU	TU03	FISNACHT	h2tg000030l	5260
TU	TU03	FISNACHT	h2tg000031l	5269
TU	TU03	FISNACHT	h2tg000040l	3069
TU	TU03	FISNACHT	h2tg000041l	6261
TU	TU03	FISNACHT	h2tg000042l	3597
TU	TU03	FISNACHT	h2tg000046l	5869
TU	TU03	FISNACHT	h2tg000049l	5179
TU	TU03	FISNACHT	h2tg000050l	5032
TU	TU03	FISNACHT	h2tg000052l	6503
TU	TU03	FISNACHT	h2tg000054l	4754
TU	TU03	FISNACHT	h2tg000055l	6754
TU	TU03	FISNACHT	h2tg000056l	6055
TU	TU03	FISNACHT	h2tg000058l	9232
TU	TU03	FISNACHT	h2tg000063l	5808
TU	TU03	FISNACHT	h2tg000064l	7174
TU	TU03	FISNACHT	h2tg000065l	7826
TU	TU03	FISNACHT	h2tg000066l	6231
TU	TU03	FISNACHT	h2tg000070l	5947
TU	TU03	FISNACHT	h2tg000071l	6123
TU	TU03	FISNACHT	h2tg000073l	6402
TU	TU03	FISNACHT	h2tg000075l	4596
TU	TU03	FISNACHT	h2tg000076l	7274
TU	TU03	FISNACHT	h2tg000078l	6854
TU	TU03	FISNACHT	h2tg000080l	5377
TU	TU03	FISNACHT	h2tg000081l	6389
TU	TU03	FISNACHT	h2tg000083l	6673
TU	TU03	FISNACHT	h2tg000094l	5987
TU	TU03	FISNACHT	h2tg000097l	6888
TU	TU03	FISNACHT	h2tg000098l	4456
TU	TU03	FISNACHT	h2tg000106l	6032
TU	TU03	FISNACHT	h2tg000107l	5860
TU	TU03	FISNACHT	h2tg000108l	6726
TU	TU03	FISNACHT	h2tg000110l	9845
TU	TU03	FISNACHT	h2tg000112l	8141
TU	TU03	FISNACHT	h2tg000114l	6190
TU	TU03	FISNACHT	h2tg000116l	3803
TU	TU03	FISNACHT	h2tg000117l	3500
TU	TU03	FISNACHT	h2tg000118l	3853
TU	TU03	FISNACHT	h2tg000119l	3527
TU	TU03	FISNACHT	h2tg000120l	9443
TU	TU03	FISNACHT	h2tg000123l	6814
TU	TU03	FISNACHT	h2tg000124l	4375
TU	TU03	FISNACHT	h2tg000128l	6312
TU	TU03	FISNACHT	h2tg000130l	5696
TU	TU03	FISNACHT	h2tg000132l	6911
TU	TU03	FISNACHT	h2tg000133l	7307
TU	TU03	FISNACHT	h2tg000134l	4383
TU	TU03	FISNACHT	h2tg000135l	5957
TU	TU03	FISNACHT	h2tg000136l	4813
TU	TU03	FISNACHT	h2tg000137l	7685
TU	TU03	FISNACHT	h2tg000143l	5843
TU	TU03	FISNACHT	h2tg000145l	4830
TU	TU03	FISNACHT	h2tg000146l	4907
TU	TU03	FISNACHT	h2tg000147l	5470
TU	TU03	FISNACHT	h2tg000149l	6014
TU	TU03	FISNACHT	h2tg000150l	3359
TU	TU03	FISNACHT	h2tg000151l	4807
TU	TU03	FISNACHT	h2tg000152l	8121
TU	TU03	FISNACHT	h2tg000153l	6024
TU	TU03	FISNACHT	h2tg000156l	5981
TU	TU03	FISNACHT	h2tg000158l	6367
TU	TU03	FISNACHT	h2tg000160l	4496
TU	TU03	FISNACHT	h2tg000162l	4989
TU	TU03	FISNACHT	h2tg000165l	4635
TU	TU03	FISNACHT	h2tg000168l	5662
TU	TU03	FISNACHT	h2tg000169l	6377
TU	TU03	FISNACHT	h2tg000171l	8843
TU	TU03	FISNACHT	h2tg000172l	4662
TU	TU03	FISNACHT	h2tg000174l	6310
TU	TU03	FISNACHT	h2tg000175l	3857
TU	TU03	FISNACHT	h2tg000178l	5274
TU	TU03	FISNACHT	h2tg000180l	5682
TU	TU03	FISNACHT	h2tg000184l	4808
TU	TU03	FISNACHT	h2tg000185l	5501
TU	TU03	FISNACHT	h2tg000187l	6379
TU	TU03	FISNACHT	h2tg000188l	5065
TU	TU03	FISNACHT	h2tg000189l	4455
TU	TU03	FISNACHT	h2tg000190l	6542
TU	TU03	FISNACHT	h2tg000191l	5420
TU	TU03	FISNACHT	h2tg000194l	6470
TU	TU03	FISNACHT	h2tg000196l	3246
TU	TU03	FISNACHT	h2tg000197l	5196
TU	TU03	FISNACHT	h2tg000198l	5701
TU	TU03	FISNACHT	h2tg000201l	6266
TU	TU03	FISNACHT	h2tg000202l	6136
TU	TU03	FISNACHT	h2tg000203l	6217
TU	TU03	FISNACHT	h2tg000204l	6572
TU	TU03	FISNACHT	h2tg000205l	10180
TU	TU03	FISNACHT	h2tg000207l	5297
TU	TU03	FISNACHT	h2tg000208l	6074
TU	TU03	FISNACHT	h2tg000209l	5106
TU	TU03	FISNACHT	h2tg000210l	6666
TU	TU03	FISNACHT	h2tg000211l	6396
TU	TU03	FISNACHT	h2tg000214l	4539
TU	TU03	FISNACHT	h2tg000215l	5519
TU	TU03	FISNACHT	h2tg000217l	5380
TU	TU03	FISNACHT	h2tg000218l	4681
TU	TU03	FISNACHT	h2tg000219l	4013
TU	TU03	FISNACHT	h2tg000220l	6362
TU	TU03	FISNACHT	h2tg000222l	5379
TU	TU03	FISNACHT	h2tg000225l	5630
TU	TU03	FISNACHT	h2tg000226l	4846
TU	TU03	FISNACHT	h2tg000227l	5396
TU	TU03	FISNACHT	h2tg000229l	5697
TU	TU03	FISNACHT	h2tg000230l	5117
TU	TU03	FISNACHT	h2tg000233l	4678
TU	TU03	FISNACHT	h2tg000234l	7263
TU	TU03	FISNACHT	h2tg000235l	5187
TU	TU03	FISNACHT	h2tg000236l	4043
TU	TU03	FISNACHT	h2tg000241l	5883
TU	TU03	FISNACHT	h2tg000242l	5350
TU	TU03	FISNACHT	h2tg000243l	5010
TU	TU03	FISNACHT	h2tg000245l	5575
TU	TU03	FISNACHT	h2tg000247l	5512
TU	TU03	FISNACHT	h2tg000249l	6310
TU	TU03	FISNACHT	h2tg000250l	5723
TU	TU03	FISNACHT	h2tg000251l	6884
TU	TU03	FISNACHT	h2tg000252l	5012
TU	TU03	FISNACHT	h2tg000253l	4481
TU	TU03	FISNACHT	h2tg000256l	6342
TU	TU03	FISNACHT	h2tg000258l	6791
TU	TU03	FISNACHT	h2tg000259l	4238
TU	TU03	FISNACHT	h2tg000261l	3938
TU	TU03	FISNACHT	h2tg000262l	4779
TU	TU03	FISNACHT	h2tg000263l	5805
TU	TU03	FISNACHT	h2tg000265l	3916
TU	TU03	FISNACHT	h2tg000266l	4645
TU	TU03	FISNACHT	h2tg000270l	4961
TU	TU03	FISNACHT	h2tg000272l	4270
TU	TU06	FISNACHT	h1tg000002l	4350
TU	TU06	FISNACHT	h1tg000005l	11922
TU	TU06	FISNACHT	h1tg000011l	5127
TU	TU06	FISNACHT	h1tg000012l	6256
TU	TU06	FISNACHT	h1tg000028l	6015
TU	TU06	FISNACHT	h1tg000029l	5990
TU	TU06	FISNACHT	h1tg000030l	5603
TU	TU06	FISNACHT	h1tg000031l	6196
TU	TU06	FISNACHT	h1tg000033l	6725
TU	TU06	FISNACHT	h1tg000035l	5508
TU	TU06	FISNACHT	h1tg000036l	9047
TU	TU06	FISNACHT	h1tg000044l	5108
TU	TU06	FISNACHT	h1tg000052l	4920
TU	TU06	FISNACHT	h1tg000055l	9573
TU	TU06	FISNACHT	h1tg000056l	5403
TU	TU06	FISNACHT	h1tg000063l	6581
TU	TU06	FISNACHT	h1tg000065l	10278
TU	TU06	FISNACHT	h1tg000066l	6833
TU	TU06	FISNACHT	h1tg000068l	5398
TU	TU06	FISNACHT	h1tg000070l	7065
TU	TU06	FISNACHT	h1tg000071l	4675
TU	TU06	FISNACHT	h1tg000074l	5957
TU	TU06	FISNACHT	h1tg000075l	5979
TU	TU06	FISNACHT	h1tg000078l	6102
TU	TU06	FISNACHT	h1tg000079l	6151
TU	TU06	FISNACHT	h1tg000086l	6135
TU	TU06	FISNACHT	h1tg000088l	5737
TU	TU06	FISNACHT	h1tg000089l	9108
TU	TU06	FISNACHT	h1tg000093l	5640
TU	TU06	FISNACHT	h1tg000095l	6293
TU	TU06	FISNACHT	h1tg000098l	5681
TU	TU06	FISNACHT	h1tg000102l	6382
TU	TU06	FISNACHT	h1tg000106l	4793
TU	TU06	FISNACHT	h1tg000107l	5842
TU	TU06	FISNACHT	h1tg000118l	6285
TU	TU06	FISNACHT	h1tg000123l	5546
TU	TU06	FISNACHT	h1tg000126l	6008
TU	TU06	FISNACHT	h1tg000127l	6358
TU	TU06	FISNACHT	h1tg000129l	7362
TU	TU06	FISNACHT	h1tg000130l	4625
TU	TU06	FISNACHT	h1tg000131l	6693
TU	TU06	FISNACHT	h1tg000134l	5745
TU	TU06	FISNACHT	h1tg000139l	5722
TU	TU06	FISNACHT	h1tg000140l	7168
TU	TU06	FISNACHT	h1tg000145l	5889
TU	TU06	FISNACHT	h1tg000146l	4658
TU	TU06	FISNACHT	h1tg000148l	6314
TU	TU06	FISNACHT	h1tg000149l	6367
TU	TU06	FISNACHT	h1tg000154l	6414
TU	TU06	FISNACHT	h1tg000157l	4569
TU	TU06	FISNACHT	h1tg000158l	5742
TU	TU06	FISNACHT	h1tg000163l	6317
TU	TU06	FISNACHT	h1tg000168l	6595
TU	TU06	FISNACHT	h1tg000173l	6566
TU	TU06	FISNACHT	h1tg000174l	5979
TU	TU06	FISNACHT	h1tg000175l	9947
TU	TU06	FISNACHT	h1tg000176l	6517
TU	TU06	FISNACHT	h1tg000183l	9951
TU	TU06	FISNACHT	h1tg000185l	5495
TU	TU06	FISNACHT	h1tg000187l	6195
TU	TU06	FISNACHT	h1tg000188l	6291
TU	TU06	FISNACHT	h1tg000190l	6632
TU	TU06	FISNACHT	h1tg000192l	4416
TU	TU06	FISNACHT	h1tg000195l	3938
TU	TU06	FISNACHT	h1tg000201l	6963
TU	TU06	FISNACHT	h1tg000206l	6225
TU	TU06	FISNACHT	h1tg000207l	4739
TU	TU06	FISNACHT	h1tg000209l	7336
TU	TU06	FISNACHT	h1tg000211l	5106
TU	TU06	FISNACHT	h1tg000213l	6080
TU	TU06	FISNACHT	h1tg000222l	5891
TU	TU06	FISNACHT	h1tg000223l	8504
TU	TU06	FISNACHT	h1tg000225l	7966
TU	TU06	FISNACHT	h1tg000230l	3915
TU	TU06	FISNACHT	h1tg000235l	4014
TU	TU06	FISNACHT	h1tg000237l	5794
TU	TU06	FISNACHT	h1tg000239l	6554
TU	TU06	FISNACHT	h1tg000244l	7441
TU	TU06	FISNACHT	h1tg000246l	6685
TU	TU06	FISNACHT	h1tg000251l	6354
TU	TU06	FISNACHT	h1tg000255l	4446
TU	TU06	FISNACHT	h1tg000256l	10194
TU	TU06	FISNACHT	h1tg000263l	8149
TU	TU06	FISNACHT	h1tg000265l	5337
TU	TU06	FISNACHT	h1tg000267l	7423
TU	TU06	FISNACHT	h1tg000272l	9954
TU	TU06	FISNACHT	h1tg000273l	5433
TU	TU06	FISNACHT	h1tg000274l	6895
TU	TU06	FISNACHT	h1tg000275l	5575
TU	TU06	FISNACHT	h1tg000276l	4581
TU	TU06	FISNACHT	h1tg000286l	3751
TU	TU06	FISNACHT	h1tg000295l	7488
TU	TU06	FISNACHT	h1tg000297l	6548
TU	TU06	FISNACHT	h1tg000301l	5832
TU	TU06	FISNACHT	h1tg000307l	6145
TU	TU06	FISNACHT	h1tg000311l	6950
TU	TU06	FISNACHT	h1tg000317l	6190
TU	TU06	FISNACHT	h1tg000320l	6326
TU	TU06	FISNACHT	h1tg000323l	5130
TU	TU06	FISNACHT	h1tg000341l	4877
TU	TU06	FISNACHT	h1tg000342l	7002
TU	TU06	FISNACHT	h1tg000344l	3902
TU	TU06	FISNACHT	h1tg000346l	5888
TU	TU06	FISNACHT	h1tg000349l	7636
TU	TU06	FISNACHT	h1tg000351l	4802
TU	TU06	FISNACHT	h1tg000353l	4279
TU	TU06	FISNACHT	h1tg000360l	3863
TU	TU06	FISNACHT	h1tg000362l	5715
TU	TU06	FISNACHT	h1tg000363l	7194
TU	TU06	FISNACHT	h1tg000364l	6517
TU	TU06	FISNACHT	h1tg000369l	7553
TU	TU06	FISNACHT	h1tg000373l	5844
TU	TU06	FISNACHT	h1tg000374l	3733
TU	TU06	FISNACHT	h1tg000375l	6233
TU	TU06	FISNACHT	h1tg000379l	5557
TU	TU06	FISNACHT	h1tg000381l	6428
TU	TU06	FISNACHT	h1tg000393l	6466
TU	TU06	FISNACHT	h1tg000405l	7593
TU	TU06	FISNACHT	h1tg000416l	6691
TU	TU06	FISNACHT	h1tg000417l	4854
TU	TU06	FISNACHT	h1tg000418l	5126
TU	TU06	FISNACHT	h1tg000421l	5735
TU	TU06	FISNACHT	h1tg000424l	7302
TU	TU06	FISNACHT	h1tg000427l	6542
TU	TU06	FISNACHT	h1tg000429l	6037
TU	TU06	FISNACHT	h1tg000446l	4135
TU	TU06	FISNACHT	h1tg000450l	5365
TU	TU06	FISNACHT	h1tg000459l	5167
TU	TU06	FISNACHT	h1tg000460l	4008
TU	TU06	FISNACHT	h1tg000461l	6819
TU	TU06	FISNACHT	h1tg000463l	5037
TU	TU06	FISNACHT	h1tg000478l	3661
TU	TU06	FISNACHT	h1tg000480l	4856
TU	TU06	FISNACHT	h1tg000483l	6164
TU	TU06	FISNACHT	h1tg000484l	7611
TU	TU06	FISNACHT	h1tg000494l	6738
TU	TU06	FISNACHT	h1tg000495l	4327
TU	TU06	FISNACHT	h1tg000500l	6567
TU	TU06	FISNACHT	h1tg000504l	5514
TU	TU06	FISNACHT	h1tg000506l	3592
TU	TU06	FISNACHT	h1tg000514l	5816
TU	TU06	FISNACHT	h1tg000537l	3824
TU	TU06	FISNACHT	h1tg000544l	4304
TU	TU06	FISNACHT	h1tg000556l	5933
TU	TU06	FISNACHT	h1tg000557l	5965
TU	TU06	FISNACHT	h1tg000564l	4946
TU	TU06	FISNACHT	h1tg000570l	7095
TU	TU06	FISNACHT	h1tg000571l	3118
TU	TU06	FISNACHT	h1tg000572l	5944
TU	TU06	FISNACHT	h1tg000588l	4259
TU	TU06	FISNACHT	h1tg000597l	6127
TU	TU06	FISNACHT	h1tg000607l	5161
TU	TU06	FISNACHT	h1tg000612l	3844
TU	TU06	FISNACHT	h2tg000002l	11922
TU	TU06	FISNACHT	h2tg000003l	6358
TU	TU06	FISNACHT	h2tg000004l	6947
TU	TU06	FISNACHT	h2tg000006l	5537
TU	TU06	FISNACHT	h2tg000007l	5127
TU	TU06	FISNACHT	h2tg000008l	6256
TU	TU06	FISNACHT	h2tg000013l	8382
TU	TU06	FISNACHT	h2tg000015l	8454
TU	TU06	FISNACHT	h2tg000019l	5110
TU	TU06	FISNACHT	h2tg000020l	5990
TU	TU06	FISNACHT	h2tg000021l	6899
TU	TU06	FISNACHT	h2tg000023l	11364
TU	TU06	FISNACHT	h2tg000024l	6394
TU	TU06	FISNACHT	h2tg000026l	6387
TU	TU06	FISNACHT	h2tg000029l	5393
TU	TU06	FISNACHT	h2tg000034l	4920
TU	TU06	FISNACHT	h2tg000035l	4917
TU	TU06	FISNACHT	h2tg000036l	6917
TU	TU06	FISNACHT	h2tg000038l	6765
TU	TU06	FISNACHT	h2tg000039l	3814
TU	TU06	FISNACHT	h2tg000040l	9573
TU	TU06	FISNACHT	h2tg000042l	6698
TU	TU06	FISNACHT	h2tg000047l	6581
TU	TU06	FISNACHT	h2tg000049l	4853
TU	TU06	FISNACHT	h2tg000050l	5957
TU	TU06	FISNACHT	h2tg000054l	6102
TU	TU06	FISNACHT	h2tg000055l	6403
TU	TU06	FISNACHT	h2tg000056l	9105
TU	TU06	FISNACHT	h2tg000059l	5796
TU	TU06	FISNACHT	h2tg000062l	4998
TU	TU06	FISNACHT	h2tg000063l	7129
TU	TU06	FISNACHT	h2tg000064l	5539
TU	TU06	FISNACHT	h2tg000069l	6878
TU	TU06	FISNACHT	h2tg000072l	4793
TU	TU06	FISNACHT	h2tg000073l	5774
TU	TU06	FISNACHT	h2tg000075l	5571
TU	TU06	FISNACHT	h2tg000076l	6157
TU	TU06	FISNACHT	h2tg000077l	6028
TU	TU06	FISNACHT	h2tg000082l	5507
TU	TU06	FISNACHT	h2tg000083l	6657
TU	TU06	FISNACHT	h2tg000085l	6358
TU	TU06	FISNACHT	h2tg000086l	6168
TU	TU06	FISNACHT	h2tg000087l	6693
TU	TU06	FISNACHT	h2tg000088l	5963
TU	TU06	FISNACHT	h2tg000090l	7725
TU	TU06	FISNACHT	h2tg000092l	4913
TU	TU06	FISNACHT	h2tg000093l	6513
TU	TU06	FISNACHT	h2tg000095l	9838
TU	TU06	FISNACHT	h2tg000097l	3914
TU	TU06	FISNACHT	h2tg000098l	5656
TU	TU06	FISNACHT	h2tg000101l	6576
TU	TU06	FISNACHT	h2tg000103l	6314
TU	TU06	FISNACHT	h2tg000104l	6621
TU	TU06	FISNACHT	h2tg000106l	5865
TU	TU06	FISNACHT	h2tg000109l	6392
TU	TU06	FISNACHT	h2tg000111l	6595
TU	TU06	FISNACHT	h2tg000115l	8624
TU	TU06	FISNACHT	h2tg000116l	6566
TU	TU06	FISNACHT	h2tg000117l	9947
TU	TU06	FISNACHT	h2tg000118l	5750
TU	TU06	FISNACHT	h2tg000119l	6517
TU	TU06	FISNACHT	h2tg000121l	6195
TU	TU06	FISNACHT	h2tg000123l	4416
TU	TU06	FISNACHT	h2tg000133l	6656
TU	TU06	FISNACHT	h2tg000134l	5609
TU	TU06	FISNACHT	h2tg000135l	4739
TU	TU06	FISNACHT	h2tg000136l	7031
TU	TU06	FISNACHT	h2tg000137l	6821
TU	TU06	FISNACHT	h2tg000139l	3825
TU	TU06	FISNACHT	h2tg000140l	8504
TU	TU06	FISNACHT	h2tg000145l	4014
TU	TU06	FISNACHT	h2tg000146l	15954
TU	TU06	FISNACHT	h2tg000147l	5794
TU	TU06	FISNACHT	h2tg000150l	7441
TU	TU06	FISNACHT	h2tg000160l	5337
TU	TU06	FISNACHT	h2tg000161l	5085
TU	TU06	FISNACHT	h2tg000162l	5654
TU	TU06	FISNACHT	h2tg000165l	5433
TU	TU06	FISNACHT	h2tg000167l	4866
TU	TU06	FISNACHT	h2tg000169l	7049
TU	TU06	FISNACHT	h2tg000170l	6477
TU	TU06	FISNACHT	h2tg000172l	6912
TU	TU06	FISNACHT	h2tg000173l	5998
TU	TU06	FISNACHT	h2tg000176l	6413
TU	TU06	FISNACHT	h2tg000178l	6482
TU	TU06	FISNACHT	h2tg000180l	4904
TU	TU06	FISNACHT	h2tg000181l	7488
TU	TU06	FISNACHT	h2tg000183l	7033
TU	TU06	FISNACHT	h2tg000184l	5083
TU	TU06	FISNACHT	h2tg000186l	7136
TU	TU06	FISNACHT	h2tg000187l	6145
TU	TU06	FISNACHT	h2tg000191l	6950
TU	TU06	FISNACHT	h2tg000196l	5946
TU	TU06	FISNACHT	h2tg000198l	6190
TU	TU06	FISNACHT	h2tg000200l	6455
TU	TU06	FISNACHT	h2tg000201l	5344
TU	TU06	FISNACHT	h2tg000212l	6837
TU	TU06	FISNACHT	h2tg000213l	5391
TU	TU06	FISNACHT	h2tg000214l	4829
TU	TU06	FISNACHT	h2tg000218l	6247
TU	TU06	FISNACHT	h2tg000219l	6277
TU	TU06	FISNACHT	h2tg000220l	6294
TU	TU06	FISNACHT	h2tg000221l	5715
TU	TU06	FISNACHT	h2tg000226l	6286
TU	TU06	FISNACHT	h2tg000227l	5989
TU	TU06	FISNACHT	h2tg000228l	4205
TU	TU06	FISNACHT	h2tg000230l	4433
TU	TU06	FISNACHT	h2tg000232l	3971
TU	TU06	FISNACHT	h2tg000236l	6428
TU	TU06	FISNACHT	h2tg000238l	6466
TU	TU06	FISNACHT	h2tg000239l	6282
TU	TU06	FISNACHT	h2tg000241l	8945
TU	TU06	FISNACHT	h2tg000242l	4751
TU	TU06	FISNACHT	h2tg000243l	6189
TU	TU06	FISNACHT	h2tg000245l	5751
TU	TU06	FISNACHT	h2tg000247l	6691
TU	TU06	FISNACHT	h2tg000248l	4440
TU	TU06	FISNACHT	h2tg000249l	5735
TU	TU06	FISNACHT	h2tg000250l	5970
TU	TU06	FISNACHT	h2tg000251l	6509
TU	TU06	FISNACHT	h2tg000252l	6037
TU	TU06	FISNACHT	h2tg000257l	4767
TU	TU06	FISNACHT	h2tg000258l	6659
TU	TU06	FISNACHT	h2tg000259l	6185
TU	TU06	FISNACHT	h2tg000260l	6924
TU	TU06	FISNACHT	h2tg000261l	5498
TU	TU06	FISNACHT	h2tg000264l	3438
TU	TU06	FISNACHT	h2tg000267l	6698
TU	TU06	FISNACHT	h2tg000270l	6802
TU	TU06	FISNACHT	h2tg000271l	4388
TU	TU06	FISNACHT	h2tg000272l	5037
TU	TU06	FISNACHT	h2tg000273l	5569
TU	TU06	FISNACHT	h2tg000276l	4647
TU	TU06	FISNACHT	h2tg000280l	9522
TU	TU06	FISNACHT	h2tg000282l	7053
TU	TU06	FISNACHT	h2tg000288l	6164
TU	TU06	FISNACHT	h2tg000289l	3840
TU	TU06	FISNACHT	h2tg000290l	6672
TU	TU06	FISNACHT	h2tg000291l	7611
TU	TU06	FISNACHT	h2tg000293l	4570
TU	TU06	FISNACHT	h2tg000294l	7110
TU	TU06	FISNACHT	h2tg000297l	6738
TU	TU06	FISNACHT	h2tg000298l	9232
TU	TU06	FISNACHT	h2tg000300l	6331
TU	TU06	FISNACHT	h2tg000301l	5668
TU	TU06	FISNACHT	h2tg000305l	5122
TU	TU06	FISNACHT	h2tg000307l	5463
TU	TU06	FISNACHT	h2tg000314l	4070
TU	TU06	FISNACHT	h2tg000317l	7095
TU	TU06	FISNACHT	h2tg000318l	5944
TU	TU06	FISNACHT	h2tg000325l	6970
TU	TU08	FISNACHT	h1tg000001l	4682
TU	TU08	FISNACHT	h1tg000027l	5778
TU	TU08	FISNACHT	h1tg000029l	4505
TU	TU08	FISNACHT	h1tg000032l	5671
TU	TU08	FISNACHT	h1tg000033l	4927
TU	TU08	FISNACHT	h1tg000040l	5270
TU	TU08	FISNACHT	h2tg000002l	5482
TU	TU08	FISNACHT	h2tg000004l	4323
TU	TU10	FISNACHT	h1tg000001l	4704
TU	TU10	FISNACHT	h1tg000003l	6581
TU	TU10	FISNACHT	h1tg000006l	4949
TU	TU10	FISNACHT	h1tg000010l	6955
TU	TU10	FISNACHT	h1tg000015l	5196
TU	TU10	FISNACHT	h1tg000021l	3951
TU	TU10	FISNACHT	h1tg000031l	5535
TU	TU10	FISNACHT	h1tg000038l	5745
TU	TU10	FISNACHT	h1tg000055l	5137
TU	TU10	FISNACHT	h1tg000058l	6641
TU	TU10	FISNACHT	h1tg000069l	5664
TU	TU10	FISNACHT	h1tg000071l	4950
TU	TU10	FISNACHT	h1tg000072l	4293
TU	TU12	FISNACHT	h1tg000001l	6804
TU	TU12	FISNACHT	h1tg000003l	6462
TU	TU12	FISNACHT	h1tg000007l	5782
TU	TU12	FISNACHT	h1tg000010l	6807
TU	TU12	FISNACHT	h1tg000012l	5341
TU	TU12	FISNACHT	h1tg000015l	8644
TU	TU14	FISNACHT	h1tg000018l	6598
TU	TU14	FISNACHT	h1tg000019l	5145
TU	TU14	FISNACHT	h1tg000025l	7817
TU	TU14	FISNACHT	h1tg000028l	7499
TU	TU14	FISNACHT	h1tg000035l	4251
TU	TU14	FISNACHT	h1tg000036l	4741
TU	TU14	FISNACHT	h1tg000042l	5276
TU	TU14	FISNACHT	h1tg000048l	6915
TU	TU14	FISNACHT	h1tg000053l	6665
TU	TU14	FISNACHT	h1tg000066l	5597
TU	TU14	FISNACHT	h2tg000001l	3957
TU	TU14	FISNACHT	h2tg000005l	6440
TU	TU14	FISNACHT	h2tg000006l	5871
CGN	CGN1	FISNACHT	h1tg000001l	6494
CGN	CGN1	FISNACHT	h1tg000005l	11663
CGN	CGN1	FISNACHT	h1tg000006l	7027
CGN	CGN1	FISNACHT	h1tg000009l	19251
CGN	CGN1	FISNACHT	h1tg000011l	4685
CGN	CGN1	FISNACHT	h1tg000015l	6080
CGN	CGN1	FISNACHT	h1tg000017l	5197
CGN	CGN1	FISNACHT	h1tg000022l	6844
CGN	CGN1	FISNACHT	h1tg000023l	5416
CGN	CGN1	FISNACHT	h1tg000029l	4585
CGN	CGN1	FISNACHT	h1tg000031l	6053
CGN	CGN1	FISNACHT	h1tg000032l	7132
CGN	CGN1	FISNACHT	h1tg000036l	5070
CGN	CGN1	FISNACHT	h1tg000037l	4221
CGN	CGN1	FISNACHT	h1tg000039l	8396
CGN	CGN1	FISNACHT	h1tg000040l	8087
CGN	CGN1	FISNACHT	h1tg000042l	6923
CGN	CGN1	FISNACHT	h1tg000043l	6746
CGN	CGN1	FISNACHT	h1tg000045l	6634
CGN	CGN1	FISNACHT	h1tg000046l	5880
CGN	CGN1	FISNACHT	h1tg000049l	5447
CGN	CGN1	FISNACHT	h1tg000054l	7442
CGN	CGN1	FISNACHT	h1tg000056l	8666
CGN	CGN1	FISNACHT	h1tg000057l	7453
CGN	CGN1	FISNACHT	h1tg000061l	6717
CGN	CGN1	FISNACHT	h1tg000065l	6706
CGN	CGN1	FISNACHT	h1tg000066l	6064
CGN	CGN1	FISNACHT	h1tg000067l	10769
CGN	CGN1	FISNACHT	h1tg000075l	5998
CGN	CGN1	FISNACHT	h1tg000076l	4222
CGN	CGN1	FISNACHT	h1tg000077l	6421
CGN	CGN1	FISNACHT	h1tg000088l	7520
CGN	CGN1	FISNACHT	h1tg000094l	7407
CGN	CGN1	FISNACHT	h1tg000096l	5598
CGN	CGN1	FISNACHT	h1tg000099l	7787
CGN	CGN1	FISNACHT	h1tg000102l	5757
CGN	CGN1	FISNACHT	h1tg000104l	9881
CGN	CGN1	FISNACHT	h1tg000115l	5127
CGN	CGN1	FISNACHT	h1tg000120l	14877
CGN	CGN1	FISNACHT	h1tg000123l	7305
CGN	CGN1	FISNACHT	h1tg000127l	6270
CGN	CGN1	FISNACHT	h1tg000130l	7465
CGN	CGN1	FISNACHT	h1tg000131l	6558
CGN	CGN1	FISNACHT	h1tg000132l	6280
CGN	CGN1	FISNACHT	h1tg000133l	12655
CGN	CGN1	FISNACHT	h1tg000136l	9878
CGN	CGN1	FISNACHT	h1tg000141l	8672
CGN	CGN1	FISNACHT	h1tg000142l	4488
CGN	CGN1	FISNACHT	h1tg000144l	5619
CGN	CGN1	FISNACHT	h1tg000145l	6265
CGN	CGN1	FISNACHT	h1tg000150l	6643
CGN	CGN1	FISNACHT	h1tg000155l	10195
CGN	CGN1	FISNACHT	h1tg000159l	5199
CGN	CGN1	FISNACHT	h1tg000163l	6344
CGN	CGN1	FISNACHT	h1tg000165l	7720
CGN	CGN1	FISNACHT	h1tg000169l	5909
CGN	CGN1	FISNACHT	h1tg000170l	7620
CGN	CGN1	FISNACHT	h1tg000177l	5475
CGN	CGN1	FISNACHT	h1tg000180l	5122
CGN	CGN1	FISNACHT	h1tg000181l	7504
CGN	CGN1	FISNACHT	h1tg000182l	6749
CGN	CGN1	FISNACHT	h1tg000185l	4940
CGN	CGN1	FISNACHT	h1tg000186l	8173
CGN	CGN1	FISNACHT	h1tg000187l	6808
CGN	CGN1	FISNACHT	h1tg000196l	4859
CGN	CGN1	FISNACHT	h1tg000199l	7266
CGN	CGN1	FISNACHT	h1tg000200l	5908
CGN	CGN1	FISNACHT	h1tg000205l	5215
CGN	CGN1	FISNACHT	h1tg000207l	6045
CGN	CGN1	FISNACHT	h1tg000208l	9270
CGN	CGN1	FISNACHT	h1tg000215l	7059
CGN	CGN1	FISNACHT	h1tg000218l	6695
CGN	CGN1	FISNACHT	h1tg000220l	5568
CGN	CGN1	FISNACHT	h1tg000222l	5232
CGN	CGN1	FISNACHT	h1tg000224l	5827
CGN	CGN1	FISNACHT	h1tg000230l	7170
CGN	CGN1	FISNACHT	h1tg000231l	7458
CGN	CGN1	FISNACHT	h1tg000235l	6927
CGN	CGN1	FISNACHT	h1tg000237l	10409
CGN	CGN1	FISNACHT	h1tg000242l	5407
CGN	CGN1	FISNACHT	h1tg000244l	4964
CGN	CGN1	FISNACHT	h1tg000254l	6488
CGN	CGN1	FISNACHT	h1tg000255l	4312
CGN	CGN1	FISNACHT	h1tg000256l	5836
CGN	CGN1	FISNACHT	h1tg000260l	9863
CGN	CGN1	FISNACHT	h1tg000262l	6439
CGN	CGN1	FISNACHT	h1tg000264l	7922
CGN	CGN1	FISNACHT	h1tg000266l	6866
CGN	CGN1	FISNACHT	h1tg000269l	6505
CGN	CGN1	FISNACHT	h1tg000272l	5189
CGN	CGN1	FISNACHT	h1tg000274l	9233
CGN	CGN1	FISNACHT	h1tg000282l	7260
CGN	CGN1	FISNACHT	h1tg000284l	6238
CGN	CGN1	FISNACHT	h1tg000286l	8007
CGN	CGN1	FISNACHT	h1tg000287l	4599
CGN	CGN1	FISNACHT	h1tg000290l	6521
CGN	CGN1	FISNACHT	h1tg000292l	7340
CGN	CGN1	FISNACHT	h1tg000294l	4453
CGN	CGN1	FISNACHT	h1tg000296l	6224
CGN	CGN1	FISNACHT	h1tg000298l	7026
CGN	CGN1	FISNACHT	h1tg000299l	5050
CGN	CGN1	FISNACHT	h1tg000304l	6422
CGN	CGN1	FISNACHT	h1tg000308l	5415
CGN	CGN1	FISNACHT	h1tg000313l	4635
CGN	CGN1	FISNACHT	h1tg000317l	6000
CGN	CGN1	FISNACHT	h1tg000320l	7215
CGN	CGN1	FISNACHT	h1tg000321l	5753
CGN	CGN1	FISNACHT	h1tg000328l	5614
CGN	CGN1	FISNACHT	h1tg000329l	6025
CGN	CGN1	FISNACHT	h1tg000331l	4753
CGN	CGN1	FISNACHT	h1tg000333l	8032
CGN	CGN1	FISNACHT	h1tg000336l	8965
CGN	CGN1	FISNACHT	h1tg000341l	6723
CGN	CGN1	FISNACHT	h1tg000343l	8275
CGN	CGN1	FISNACHT	h1tg000345l	6077
CGN	CGN1	FISNACHT	h1tg000351l	5666
CGN	CGN1	FISNACHT	h1tg000352l	5554
CGN	CGN1	FISNACHT	h1tg000354l	6182
CGN	CGN1	FISNACHT	h1tg000357l	4222
CGN	CGN1	FISNACHT	h1tg000359l	6841
CGN	CGN1	FISNACHT	h1tg000360l	7238
CGN	CGN1	FISNACHT	h1tg000365l	6929
CGN	CGN1	FISNACHT	h1tg000371l	4249
CGN	CGN1	FISNACHT	h1tg000378l	6002
CGN	CGN1	FISNACHT	h1tg000379l	6863
CGN	CGN1	FISNACHT	h1tg000380l	7218
CGN	CGN1	FISNACHT	h1tg000383l	6365
CGN	CGN1	FISNACHT	h1tg000384l	6418
CGN	CGN1	FISNACHT	h1tg000387l	8755
CGN	CGN1	FISNACHT	h1tg000388l	4721
CGN	CGN1	FISNACHT	h1tg000393l	8134
CGN	CGN1	FISNACHT	h1tg000397l	5628
CGN	CGN1	FISNACHT	h1tg000402l	5440
CGN	CGN1	FISNACHT	h1tg000403l	4955
CGN	CGN1	FISNACHT	h1tg000405l	5872
CGN	CGN1	FISNACHT	h1tg000406l	5010
CGN	CGN1	FISNACHT	h1tg000415l	5134
CGN	CGN1	FISNACHT	h1tg000421l	6488
CGN	CGN1	FISNACHT	h1tg000422l	5633
CGN	CGN1	FISNACHT	h1tg000423l	3621
CGN	CGN1	FISNACHT	h1tg000428l	6541
CGN	CGN1	FISNACHT	h1tg000431l	6342
CGN	CGN1	FISNACHT	h1tg000432l	9588
CGN	CGN1	FISNACHT	h1tg000433l	6274
CGN	CGN1	FISNACHT	h1tg000435l	7161
CGN	CGN1	FISNACHT	h1tg000436l	7625
CGN	CGN1	FISNACHT	h1tg000438l	6644
CGN	CGN1	FISNACHT	h1tg000439l	8043
CGN	CGN1	FISNACHT	h1tg000440l	7052
CGN	CGN1	FISNACHT	h1tg000444l	5735
CGN	CGN1	FISNACHT	h1tg000446l	7400
CGN	CGN1	FISNACHT	h1tg000451l	5080
CGN	CGN1	FISNACHT	h1tg000454l	6004
CGN	CGN1	FISNACHT	h1tg000457l	5446
CGN	CGN1	FISNACHT	h1tg000460l	7944
CGN	CGN1	FISNACHT	h1tg000464l	4859
CGN	CGN1	FISNACHT	h1tg000468l	5820
CGN	CGN1	FISNACHT	h1tg000470l	6277
CGN	CGN1	FISNACHT	h1tg000473l	6396
CGN	CGN1	FISNACHT	h1tg000481l	4607
CGN	CGN1	FISNACHT	h1tg000483l	5543
CGN	CGN1	FISNACHT	h1tg000485l	4983
CGN	CGN1	FISNACHT	h1tg000486l	5662
CGN	CGN1	FISNACHT	h1tg000487l	8542
CGN	CGN1	FISNACHT	h1tg000488l	4974
CGN	CGN1	FISNACHT	h1tg000498l	8232
CGN	CGN1	FISNACHT	h1tg000501l	6853
CGN	CGN1	FISNACHT	h1tg000507l	5853
CGN	CGN1	FISNACHT	h1tg000508l	7122
CGN	CGN1	FISNACHT	h1tg000511l	4711
CGN	CGN1	FISNACHT	h1tg000515l	3926
CGN	CGN1	FISNACHT	h1tg000516l	6252
CGN	CGN1	FISNACHT	h1tg000525l	5929
CGN	CGN1	FISNACHT	h1tg000526l	6314
CGN	CGN1	FISNACHT	h1tg000527l	5754
CGN	CGN1	FISNACHT	h1tg000531l	4846
CGN	CGN1	FISNACHT	h1tg000533l	5829
CGN	CGN1	FISNACHT	h1tg000541l	8047
CGN	CGN1	FISNACHT	h1tg000547l	5308
CGN	CGN1	FISNACHT	h1tg000553l	7143
CGN	CGN1	FISNACHT	h1tg000554l	7436
CGN	CGN1	FISNACHT	h1tg000555l	4545
CGN	CGN1	FISNACHT	h1tg000558l	5985
CGN	CGN1	FISNACHT	h1tg000566l	4673
CGN	CGN1	FISNACHT	h1tg000589l	4889
CGN	CGN1	FISNACHT	h1tg000598l	4618
CGN	CGN1	FISNACHT	h2tg000004l	7027
CGN	CGN1	FISNACHT	h2tg000006l	19251
CGN	CGN1	FISNACHT	h2tg000008l	5380
CGN	CGN1	FISNACHT	h2tg000009l	6192
CGN	CGN1	FISNACHT	h2tg000010l	6632
CGN	CGN1	FISNACHT	h2tg000012l	6844
CGN	CGN1	FISNACHT	h2tg000018l	7249
CGN	CGN1	FISNACHT	h2tg000019l	5321
CGN	CGN1	FISNACHT	h2tg000023l	10531
CGN	CGN1	FISNACHT	h2tg000024l	8766
CGN	CGN1	FISNACHT	h2tg000025l	7954
CGN	CGN1	FISNACHT	h2tg000026l	6163
CGN	CGN1	FISNACHT	h2tg000027l	4221
CGN	CGN1	FISNACHT	h2tg000028l	5482
CGN	CGN1	FISNACHT	h2tg000029l	5506
CGN	CGN1	FISNACHT	h2tg000031l	8087
CGN	CGN1	FISNACHT	h2tg000033l	6923
CGN	CGN1	FISNACHT	h2tg000034l	6746
CGN	CGN1	FISNACHT	h2tg000036l	6075
CGN	CGN1	FISNACHT	h2tg000038l	8378
CGN	CGN1	FISNACHT	h2tg000039l	6083
CGN	CGN1	FISNACHT	h2tg000040l	6634
CGN	CGN1	FISNACHT	h2tg000041l	6622
CGN	CGN1	FISNACHT	h2tg000042l	4846
CGN	CGN1	FISNACHT	h2tg000043l	4343
CGN	CGN1	FISNACHT	h2tg000044l	5880
CGN	CGN1	FISNACHT	h2tg000046l	5371
CGN	CGN1	FISNACHT	h2tg000052l	7375
CGN	CGN1	FISNACHT	h2tg000053l	4527
CGN	CGN1	FISNACHT	h2tg000054l	8075
CGN	CGN1	FISNACHT	h2tg000055l	6706
CGN	CGN1	FISNACHT	h2tg000056l	10769
CGN	CGN1	FISNACHT	h2tg000058l	6428
CGN	CGN1	FISNACHT	h2tg000060l	6281
CGN	CGN1	FISNACHT	h2tg000064l	6513
CGN	CGN1	FISNACHT	h2tg000065l	6178
CGN	CGN1	FISNACHT	h2tg000070l	9384
CGN	CGN1	FISNACHT	h2tg000072l	7407
CGN	CGN1	FISNACHT	h2tg000073l	6459
CGN	CGN1	FISNACHT	h2tg000074l	5508
CGN	CGN1	FISNACHT	h2tg000075l	4100
CGN	CGN1	FISNACHT	h2tg000076l	9881
CGN	CGN1	FISNACHT	h2tg000077l	6992
CGN	CGN1	FISNACHT	h2tg000078l	9374
CGN	CGN1	FISNACHT	h2tg000082l	8107
CGN	CGN1	FISNACHT	h2tg000085l	5125
CGN	CGN1	FISNACHT	h2tg000087l	6709
CGN	CGN1	FISNACHT	h2tg000091l	6270
CGN	CGN1	FISNACHT	h2tg000094l	6226
CGN	CGN1	FISNACHT	h2tg000096l	6851
CGN	CGN1	FISNACHT	h2tg000097l	11485
CGN	CGN1	FISNACHT	h2tg000099l	8672
CGN	CGN1	FISNACHT	h2tg000101l	6265
CGN	CGN1	FISNACHT	h2tg000102l	8040
CGN	CGN1	FISNACHT	h2tg000105l	10415
CGN	CGN1	FISNACHT	h2tg000106l	6159
CGN	CGN1	FISNACHT	h2tg000107l	10195
CGN	CGN1	FISNACHT	h2tg000111l	7388
CGN	CGN1	FISNACHT	h2tg000113l	6344
CGN	CGN1	FISNACHT	h2tg000119l	5728
CGN	CGN1	FISNACHT	h2tg000121l	4779
CGN	CGN1	FISNACHT	h2tg000123l	12774
CGN	CGN1	FISNACHT	h2tg000124l	8173
CGN	CGN1	FISNACHT	h2tg000127l	4995
CGN	CGN1	FISNACHT	h2tg000132l	5945
CGN	CGN1	FISNACHT	h2tg000133l	5338
CGN	CGN1	FISNACHT	h2tg000134l	6110
CGN	CGN1	FISNACHT	h2tg000136l	5818
CGN	CGN1	FISNACHT	h2tg000146l	7170
CGN	CGN1	FISNACHT	h2tg000147l	10409
CGN	CGN1	FISNACHT	h2tg000161l	6488
CGN	CGN1	FISNACHT	h2tg000164l	10047
CGN	CGN1	FISNACHT	h2tg000166l	6925
CGN	CGN1	FISNACHT	h2tg000167l	8036
CGN	CGN1	FISNACHT	h2tg000169l	8802
CGN	CGN1	FISNACHT	h2tg000172l	5189
CGN	CGN1	FISNACHT	h2tg000177l	7260
CGN	CGN1	FISNACHT	h2tg000178l	7829
CGN	CGN1	FISNACHT	h2tg000179l	6238
CGN	CGN1	FISNACHT	h2tg000180l	4599
CGN	CGN1	FISNACHT	h2tg000181l	6521
CGN	CGN1	FISNACHT	h2tg000182l	4063
CGN	CGN1	FISNACHT	h2tg000183l	10644
CGN	CGN1	FISNACHT	h2tg000185l	7026
CGN	CGN1	FISNACHT	h2tg000188l	9954
CGN	CGN1	FISNACHT	h2tg000189l	8008
CGN	CGN1	FISNACHT	h2tg000190l	6422
CGN	CGN1	FISNACHT	h2tg000194l	6139
CGN	CGN1	FISNACHT	h2tg000196l	7215
CGN	CGN1	FISNACHT	h2tg000199l	5851
CGN	CGN1	FISNACHT	h2tg000200l	8143
CGN	CGN1	FISNACHT	h2tg000201l	6075
CGN	CGN1	FISNACHT	h2tg000203l	7025
CGN	CGN1	FISNACHT	h2tg000205l	6319
CGN	CGN1	FISNACHT	h2tg000206l	10449
CGN	CGN1	FISNACHT	h2tg000213l	6789
CGN	CGN1	FISNACHT	h2tg000214l	6949
CGN	CGN1	FISNACHT	h2tg000218l	5554
CGN	CGN1	FISNACHT	h2tg000221l	7238
CGN	CGN1	FISNACHT	h2tg000222l	7798
CGN	CGN1	FISNACHT	h2tg000225l	6929
CGN	CGN1	FISNACHT	h2tg000231l	6985
CGN	CGN1	FISNACHT	h2tg000232l	5904
CGN	CGN1	FISNACHT	h2tg000235l	4616
CGN	CGN1	FISNACHT	h2tg000236l	4421
CGN	CGN1	FISNACHT	h2tg000238l	8755
CGN	CGN1	FISNACHT	h2tg000242l	9623
CGN	CGN1	FISNACHT	h2tg000245l	5309
CGN	CGN1	FISNACHT	h2tg000247l	5010
CGN	CGN1	FISNACHT	h2tg000248l	5066
CGN	CGN1	FISNACHT	h2tg000249l	7451
CGN	CGN1	FISNACHT	h2tg000250l	5514
CGN	CGN1	FISNACHT	h2tg000251l	6788
CGN	CGN1	FISNACHT	h2tg000252l	7777
CGN	CGN1	FISNACHT	h2tg000255l	4715
CGN	CGN1	FISNACHT	h2tg000260l	5923
CGN	CGN1	FISNACHT	h2tg000261l	6488
CGN	CGN1	FISNACHT	h2tg000262l	6089
CGN	CGN1	FISNACHT	h2tg000263l	11818
CGN	CGN1	FISNACHT	h2tg000264l	4042
CGN	CGN1	FISNACHT	h2tg000269l	7675
CGN	CGN1	FISNACHT	h2tg000270l	4959
CGN	CGN1	FISNACHT	h2tg000271l	5395
CGN	CGN1	FISNACHT	h2tg000272l	9588
CGN	CGN1	FISNACHT	h2tg000274l	7161
CGN	CGN1	FISNACHT	h2tg000277l	8043
CGN	CGN1	FISNACHT	h2tg000278l	7052
CGN	CGN1	FISNACHT	h2tg000279l	5914
CGN	CGN1	FISNACHT	h2tg000280l	3875
CGN	CGN1	FISNACHT	h2tg000281l	5735
CGN	CGN1	FISNACHT	h2tg000282l	7400
CGN	CGN1	FISNACHT	h2tg000286l	7444
CGN	CGN1	FISNACHT	h2tg000289l	7944
CGN	CGN1	FISNACHT	h2tg000291l	5287
CGN	CGN1	FISNACHT	h2tg000294l	5963
CGN	CGN1	FISNACHT	h2tg000297l	6277
CGN	CGN1	FISNACHT	h2tg000303l	5178
CGN	CGN1	FISNACHT	h2tg000304l	9892
CGN	CGN1	FISNACHT	h2tg000306l	6860
CGN	CGN1	FISNACHT	h2tg000310l	8542
CGN	CGN1	FISNACHT	h2tg000312l	6878
CGN	CGN1	FISNACHT	h2tg000318l	8232
CGN	CGN1	FISNACHT	h2tg000319l	5237
CGN	CGN1	FISNACHT	h2tg000323l	5853
CGN	CGN1	FISNACHT	h2tg000324l	4012
CGN	CGN1	FISNACHT	h2tg000326l	4309
CGN	CGN1	FISNACHT	h2tg000327l	4722
CGN	CGN1	FISNACHT	h2tg000330l	5143
CGN	CGN1	FISNACHT	h2tg000331l	4106
CGN	CGN1	FISNACHT	h2tg000332l	6795
CGN	CGN1	FISNACHT	h2tg000334l	5549
CGN	CGN1	FISNACHT	h2tg000335l	6700
CGN	CGN1	FISNACHT	h2tg000337l	4678
CGN	CGN1	FISNACHT	h2tg000338l	6218
CGN	CGN1	FISNACHT	h2tg000344l	4342
CGN	CGN1	FISNACHT	h2tg000345l	6569
CGN	CGN1	FISNACHT	h2tg000351l	5541
CGN	CGN1	FISNACHT	h2tg000352l	5957
CGN	CGN1	FISNACHT	h2tg000354l	6012
CGN	CGN1	FISNACHT	h2tg000355l	7143
CGN	CGN1	FISNACHT	h2tg000356l	4951
CGN	CGN1	FISNACHT	h2tg000358l	7436
CGN	CGN1	FISNACHT	h2tg000359l	5447
CGN	CGN1	FISNACHT	h2tg000360l	6462
CGN	CGN1	FISNACHT	h2tg000364l	5628
CGN	CGN1	FISNACHT	h2tg000365l	3811
CGN	CGN1	FISNACHT	h2tg000370l	4531
CGN	CGN2	FISNACHT	h1tg000003l	6427
CGN	CGN2	FISNACHT	h1tg000005l	5159
CGN	CGN2	FISNACHT	h1tg000008l	4190
CGN	CGN2	FISNACHT	h1tg000009l	6903
CGN	CGN2	FISNACHT	h1tg000010l	6274
CGN	CGN2	FISNACHT	h1tg000012l	5351
CGN	CGN2	FISNACHT	h1tg000013l	9749
CGN	CGN2	FISNACHT	h1tg000018l	6662
CGN	CGN2	FISNACHT	h1tg000019l	12880
CGN	CGN2	FISNACHT	h1tg000021l	7333
CGN	CGN2	FISNACHT	h1tg000024l	6678
CGN	CGN2	FISNACHT	h1tg000027l	6238
CGN	CGN2	FISNACHT	h1tg000030l	5031
CGN	CGN2	FISNACHT	h1tg000035l	5071
CGN	CGN2	FISNACHT	h1tg000038l	5398
CGN	CGN2	FISNACHT	h1tg000039l	5691
CGN	CGN2	FISNACHT	h1tg000041l	6742
CGN	CGN2	FISNACHT	h1tg000042l	6749
CGN	CGN2	FISNACHT	h1tg000044l	14775
CGN	CGN2	FISNACHT	h1tg000045l	6048
CGN	CGN2	FISNACHT	h1tg000046l	4847
CGN	CGN2	FISNACHT	h1tg000047l	6426
CGN	CGN2	FISNACHT	h1tg000048l	7312
CGN	CGN2	FISNACHT	h1tg000049l	6765
CGN	CGN2	FISNACHT	h1tg000051l	6790
CGN	CGN2	FISNACHT	h1tg000052l	5357
CGN	CGN2	FISNACHT	h1tg000053l	4517
CGN	CGN2	FISNACHT	h1tg000055l	5571
CGN	CGN2	FISNACHT	h1tg000059l	4622
CGN	CGN2	FISNACHT	h1tg000060l	4894
CGN	CGN2	FISNACHT	h1tg000061l	5410
CGN	CGN2	FISNACHT	h1tg000062l	4062
CGN	CGN2	FISNACHT	h1tg000063l	5723
CGN	CGN2	FISNACHT	h1tg000067l	6440
CGN	CGN2	FISNACHT	h1tg000069l	5238
CGN	CGN2	FISNACHT	h1tg000070l	6420
CGN	CGN2	FISNACHT	h1tg000071l	6270
CGN	CGN2	FISNACHT	h1tg000074l	6672
CGN	CGN2	FISNACHT	h1tg000075l	6671
CGN	CGN2	FISNACHT	h1tg000077l	10003
CGN	CGN2	FISNACHT	h1tg000082l	7050
CGN	CGN2	FISNACHT	h1tg000085l	5872
CGN	CGN2	FISNACHT	h1tg000086l	6493
CGN	CGN2	FISNACHT	h1tg000087l	6687
CGN	CGN2	FISNACHT	h1tg000089l	5930
CGN	CGN2	FISNACHT	h1tg000094l	5600
CGN	CGN2	FISNACHT	h1tg000099l	6146
CGN	CGN2	FISNACHT	h1tg000101l	4923
CGN	CGN2	FISNACHT	h1tg000105l	6697
CGN	CGN2	FISNACHT	h1tg000106l	6575
CGN	CGN2	FISNACHT	h1tg000108l	6785
CGN	CGN2	FISNACHT	h1tg000112l	6557
CGN	CGN2	FISNACHT	h1tg000113l	4601
CGN	CGN2	FISNACHT	h1tg000114l	4787
CGN	CGN2	FISNACHT	h1tg000122l	5835
CGN	CGN2	FISNACHT	h1tg000124l	5714
CGN	CGN2	FISNACHT	h1tg000126l	6219
CGN	CGN2	FISNACHT	h1tg000130l	10323
CGN	CGN2	FISNACHT	h1tg000131l	7219
CGN	CGN2	FISNACHT	h1tg000133l	6050
CGN	CGN2	FISNACHT	h1tg000135l	5286
CGN	CGN2	FISNACHT	h1tg000137l	4913
CGN	CGN2	FISNACHT	h1tg000141l	6565
CGN	CGN2	FISNACHT	h1tg000144l	5451
CGN	CGN2	FISNACHT	h1tg000145l	6707
CGN	CGN2	FISNACHT	h1tg000146l	5316
CGN	CGN2	FISNACHT	h1tg000149l	6912
CGN	CGN2	FISNACHT	h1tg000151l	4431
CGN	CGN2	FISNACHT	h1tg000152l	6809
CGN	CGN2	FISNACHT	h1tg000153l	6720
CGN	CGN2	FISNACHT	h1tg000155l	4652
CGN	CGN2	FISNACHT	h1tg000158l	6083
CGN	CGN2	FISNACHT	h1tg000162l	4689
CGN	CGN2	FISNACHT	h1tg000163l	5407
CGN	CGN2	FISNACHT	h1tg000166l	8407
CGN	CGN2	FISNACHT	h1tg000168l	6271
CGN	CGN2	FISNACHT	h1tg000170l	5857
CGN	CGN2	FISNACHT	h1tg000171l	6559
CGN	CGN2	FISNACHT	h1tg000178l	5499
CGN	CGN2	FISNACHT	h1tg000185l	6028
CGN	CGN2	FISNACHT	h1tg000187l	6891
CGN	CGN2	FISNACHT	h1tg000189l	5887
CGN	CGN2	FISNACHT	h1tg000190l	5078
CGN	CGN2	FISNACHT	h1tg000191l	5087
CGN	CGN2	FISNACHT	h1tg000192l	4945
CGN	CGN2	FISNACHT	h1tg000193l	5680
CGN	CGN2	FISNACHT	h1tg000195l	3950
CGN	CGN2	FISNACHT	h1tg000197l	5959
CGN	CGN2	FISNACHT	h1tg000199l	5322
CGN	CGN2	FISNACHT	h1tg000204l	6597
CGN	CGN2	FISNACHT	h1tg000206l	6131
CGN	CGN2	FISNACHT	h1tg000209l	5187
CGN	CGN2	FISNACHT	h1tg000210l	11320
CGN	CGN2	FISNACHT	h1tg000214l	5636
CGN	CGN2	FISNACHT	h1tg000217l	5020
CGN	CGN2	FISNACHT	h1tg000218l	6645
CGN	CGN2	FISNACHT	h1tg000220l	6808
CGN	CGN2	FISNACHT	h1tg000221l	5478
CGN	CGN2	FISNACHT	h1tg000224l	4463
CGN	CGN2	FISNACHT	h1tg000226l	7317
CGN	CGN2	FISNACHT	h1tg000233l	5964
CGN	CGN2	FISNACHT	h1tg000236l	5871
CGN	CGN2	FISNACHT	h1tg000242l	4880
CGN	CGN2	FISNACHT	h1tg000243l	9002
CGN	CGN2	FISNACHT	h1tg000247l	6153
CGN	CGN2	FISNACHT	h1tg000248l	5531
CGN	CGN2	FISNACHT	h1tg000251l	6732
CGN	CGN2	FISNACHT	h1tg000255l	5388
CGN	CGN2	FISNACHT	h1tg000260l	5536
CGN	CGN2	FISNACHT	h1tg000261l	4802
CGN	CGN2	FISNACHT	h1tg000264l	6980
CGN	CGN2	FISNACHT	h1tg000266l	6106
CGN	CGN2	FISNACHT	h1tg000267l	5873
CGN	CGN2	FISNACHT	h1tg000269l	4866
CGN	CGN2	FISNACHT	h1tg000272l	5857
CGN	CGN2	FISNACHT	h1tg000275l	4991
CGN	CGN2	FISNACHT	h1tg000277l	6558
CGN	CGN2	FISNACHT	h1tg000278l	4938
CGN	CGN2	FISNACHT	h1tg000281l	4813
CGN	CGN2	FISNACHT	h1tg000284l	6581
CGN	CGN2	FISNACHT	h1tg000295l	11572
CGN	CGN2	FISNACHT	h1tg000298l	8523
CGN	CGN2	FISNACHT	h1tg000300l	8636
CGN	CGN2	FISNACHT	h1tg000304l	6281
CGN	CGN2	FISNACHT	h1tg000305l	3516
CGN	CGN2	FISNACHT	h1tg000306l	7896
CGN	CGN2	FISNACHT	h1tg000307l	6261
CGN	CGN2	FISNACHT	h1tg000309l	6404
CGN	CGN2	FISNACHT	h1tg000310l	6009
CGN	CGN2	FISNACHT	h1tg000312l	5779
CGN	CGN2	FISNACHT	h1tg000315l	5904
CGN	CGN2	FISNACHT	h1tg000316l	5057
CGN	CGN2	FISNACHT	h1tg000318l	5908
CGN	CGN2	FISNACHT	h1tg000319l	8051
CGN	CGN2	FISNACHT	h1tg000321l	4726
CGN	CGN2	FISNACHT	h1tg000324l	5274
CGN	CGN2	FISNACHT	h1tg000328l	5455
CGN	CGN2	FISNACHT	h1tg000330l	6158
CGN	CGN2	FISNACHT	h1tg000333l	5676
CGN	CGN2	FISNACHT	h1tg000334l	4651
CGN	CGN2	FISNACHT	h1tg000338l	9597
CGN	CGN2	FISNACHT	h1tg000342l	5545
CGN	CGN2	FISNACHT	h1tg000344l	4811
CGN	CGN2	FISNACHT	h1tg000345l	5368
CGN	CGN2	FISNACHT	h1tg000349l	6158
CGN	CGN2	FISNACHT	h1tg000350l	6610
CGN	CGN2	FISNACHT	h1tg000353l	4694
CGN	CGN2	FISNACHT	h1tg000354l	6199
CGN	CGN2	FISNACHT	h1tg000356l	5710
CGN	CGN2	FISNACHT	h1tg000358l	3743
CGN	CGN2	FISNACHT	h1tg000360l	5682
CGN	CGN2	FISNACHT	h1tg000364l	4566
CGN	CGN2	FISNACHT	h1tg000369l	5457
CGN	CGN2	FISNACHT	h1tg000371l	5832
CGN	CGN2	FISNACHT	h1tg000374l	6535
CGN	CGN2	FISNACHT	h1tg000375l	7751
CGN	CGN2	FISNACHT	h1tg000381l	6064
CGN	CGN2	FISNACHT	h1tg000382l	8765
CGN	CGN2	FISNACHT	h1tg000383l	4511
CGN	CGN2	FISNACHT	h1tg000384l	5191
CGN	CGN2	FISNACHT	h1tg000395l	5216
CGN	CGN2	FISNACHT	h1tg000400l	5935
CGN	CGN2	FISNACHT	h1tg000402l	6781
CGN	CGN2	FISNACHT	h1tg000409l	4754
CGN	CGN2	FISNACHT	h1tg000412l	6370
CGN	CGN2	FISNACHT	h1tg000413l	4253
CGN	CGN2	FISNACHT	h1tg000414l	5870
CGN	CGN2	FISNACHT	h1tg000416l	6593
CGN	CGN2	FISNACHT	h1tg000417l	6456
CGN	CGN2	FISNACHT	h1tg000419l	5151
CGN	CGN2	FISNACHT	h1tg000427l	6381
CGN	CGN2	FISNACHT	h1tg000428l	4631
CGN	CGN2	FISNACHT	h1tg000429l	4510
CGN	CGN2	FISNACHT	h1tg000431l	4983
CGN	CGN2	FISNACHT	h1tg000447l	5004
CGN	CGN2	FISNACHT	h1tg000450l	4979
CGN	CGN2	FISNACHT	h1tg000459l	5081
CGN	CGN2	FISNACHT	h1tg000461l	8215
CGN	CGN2	FISNACHT	h1tg000462l	7077
CGN	CGN2	FISNACHT	h1tg000464l	4893
CGN	CGN2	FISNACHT	h1tg000471l	4859
CGN	CGN2	FISNACHT	h2tg000003l	6775
CGN	CGN2	FISNACHT	h2tg000005l	5730
CGN	CGN2	FISNACHT	h2tg000006l	7811
CGN	CGN2	FISNACHT	h2tg000007l	4699
CGN	CGN2	FISNACHT	h2tg000008l	5569
CGN	CGN2	FISNACHT	h2tg000009l	6344
CGN	CGN2	FISNACHT	h2tg000010l	9749
CGN	CGN2	FISNACHT	h2tg000011l	4847
CGN	CGN2	FISNACHT	h2tg000012l	5397
CGN	CGN2	FISNACHT	h2tg000013l	6413
CGN	CGN2	FISNACHT	h2tg000014l	5302
CGN	CGN2	FISNACHT	h2tg000015l	7849
CGN	CGN2	FISNACHT	h2tg000016l	7199
CGN	CGN2	FISNACHT	h2tg000019l	8885
CGN	CGN2	FISNACHT	h2tg000022l	5417
CGN	CGN2	FISNACHT	h2tg000023l	5071
CGN	CGN2	FISNACHT	h2tg000024l	6092
CGN	CGN2	FISNACHT	h2tg000025l	7763
CGN	CGN2	FISNACHT	h2tg000027l	5609
CGN	CGN2	FISNACHT	h2tg000028l	8194
CGN	CGN2	FISNACHT	h2tg000029l	7860
CGN	CGN2	FISNACHT	h2tg000030l	6096
CGN	CGN2	FISNACHT	h2tg000031l	5473
CGN	CGN2	FISNACHT	h2tg000034l	7312
CGN	CGN2	FISNACHT	h2tg000035l	6765
CGN	CGN2	FISNACHT	h2tg000036l	7565
CGN	CGN2	FISNACHT	h2tg000038l	6790
CGN	CGN2	FISNACHT	h2tg000039l	5357
CGN	CGN2	FISNACHT	h2tg000041l	4601
CGN	CGN2	FISNACHT	h2tg000042l	7521
CGN	CGN2	FISNACHT	h2tg000043l	6251
CGN	CGN2	FISNACHT	h2tg000045l	5410
CGN	CGN2	FISNACHT	h2tg000046l	7059
CGN	CGN2	FISNACHT	h2tg000048l	6166
CGN	CGN2	FISNACHT	h2tg000050l	6420
CGN	CGN2	FISNACHT	h2tg000052l	5332
CGN	CGN2	FISNACHT	h2tg000053l	3887
CGN	CGN2	FISNACHT	h2tg000054l	6041
CGN	CGN2	FISNACHT	h2tg000056l	10003
CGN	CGN2	FISNACHT	h2tg000058l	6849
CGN	CGN2	FISNACHT	h2tg000059l	6907
CGN	CGN2	FISNACHT	h2tg000062l	5872
CGN	CGN2	FISNACHT	h2tg000064l	5930
CGN	CGN2	FISNACHT	h2tg000068l	4789
CGN	CGN2	FISNACHT	h2tg000072l	6243
CGN	CGN2	FISNACHT	h2tg000074l	5810
CGN	CGN2	FISNACHT	h2tg000075l	6831
CGN	CGN2	FISNACHT	h2tg000076l	5450
CGN	CGN2	FISNACHT	h2tg000078l	6215
CGN	CGN2	FISNACHT	h2tg000079l	5025
CGN	CGN2	FISNACHT	h2tg000080l	5070
CGN	CGN2	FISNACHT	h2tg000083l	6534
CGN	CGN2	FISNACHT	h2tg000084l	6557
CGN	CGN2	FISNACHT	h2tg000086l	4601
CGN	CGN2	FISNACHT	h2tg000087l	5557
CGN	CGN2	FISNACHT	h2tg000088l	5600
CGN	CGN2	FISNACHT	h2tg000089l	7115
CGN	CGN2	FISNACHT	h2tg000091l	5835
CGN	CGN2	FISNACHT	h2tg000093l	3906
CGN	CGN2	FISNACHT	h2tg000095l	6410
CGN	CGN2	FISNACHT	h2tg000096l	6078
CGN	CGN2	FISNACHT	h2tg000097l	6584
CGN	CGN2	FISNACHT	h2tg000098l	10323
CGN	CGN2	FISNACHT	h2tg000100l	6149
CGN	CGN2	FISNACHT	h2tg000103l	6493
CGN	CGN2	FISNACHT	h2tg000104l	5406
CGN	CGN2	FISNACHT	h2tg000105l	6123
CGN	CGN2	FISNACHT	h2tg000106l	4157
CGN	CGN2	FISNACHT	h2tg000107l	11123
CGN	CGN2	FISNACHT	h2tg000109l	5771
CGN	CGN2	FISNACHT	h2tg000110l	6051
CGN	CGN2	FISNACHT	h2tg000111l	5316
CGN	CGN2	FISNACHT	h2tg000113l	6836
CGN	CGN2	FISNACHT	h2tg000115l	6912
CGN	CGN2	FISNACHT	h2tg000118l	7190
CGN	CGN2	FISNACHT	h2tg000119l	6171
CGN	CGN2	FISNACHT	h2tg000120l	4087
CGN	CGN2	FISNACHT	h2tg000122l	5741
CGN	CGN2	FISNACHT	h2tg000123l	8407
CGN	CGN2	FISNACHT	h2tg000124l	5544
CGN	CGN2	FISNACHT	h2tg000125l	5175
CGN	CGN2	FISNACHT	h2tg000127l	5266
CGN	CGN2	FISNACHT	h2tg000133l	6260
CGN	CGN2	FISNACHT	h2tg000134l	5887
CGN	CGN2	FISNACHT	h2tg000135l	7846
CGN	CGN2	FISNACHT	h2tg000137l	5959
CGN	CGN2	FISNACHT	h2tg000138l	5322
CGN	CGN2	FISNACHT	h2tg000140l	5812
CGN	CGN2	FISNACHT	h2tg000141l	7117
CGN	CGN2	FISNACHT	h2tg000142l	6131
CGN	CGN2	FISNACHT	h2tg000143l	5313
CGN	CGN2	FISNACHT	h2tg000145l	7608
CGN	CGN2	FISNACHT	h2tg000148l	5493
CGN	CGN2	FISNACHT	h2tg000149l	6170
CGN	CGN2	FISNACHT	h2tg000150l	6106
CGN	CGN2	FISNACHT	h2tg000151l	6645
CGN	CGN2	FISNACHT	h2tg000152l	7501
CGN	CGN2	FISNACHT	h2tg000153l	5570
CGN	CGN2	FISNACHT	h2tg000156l	6550
CGN	CGN2	FISNACHT	h2tg000157l	5784
CGN	CGN2	FISNACHT	h2tg000161l	3699
CGN	CGN2	FISNACHT	h2tg000163l	5149
CGN	CGN2	FISNACHT	h2tg000167l	5435
CGN	CGN2	FISNACHT	h2tg000169l	6522
CGN	CGN2	FISNACHT	h2tg000172l	6980
CGN	CGN2	FISNACHT	h2tg000174l	7011
CGN	CGN2	FISNACHT	h2tg000176l	5544
CGN	CGN2	FISNACHT	h2tg000178l	6178
CGN	CGN2	FISNACHT	h2tg000179l	5664
CGN	CGN2	FISNACHT	h2tg000180l	6558
CGN	CGN2	FISNACHT	h2tg000183l	4328
CGN	CGN2	FISNACHT	h2tg000184l	6084
CGN	CGN2	FISNACHT	h2tg000185l	9624
CGN	CGN2	FISNACHT	h2tg000186l	3848
CGN	CGN2	FISNACHT	h2tg000192l	6521
CGN	CGN2	FISNACHT	h2tg000194l	4944
CGN	CGN2	FISNACHT	h2tg000195l	4839
CGN	CGN2	FISNACHT	h2tg000199l	6942
CGN	CGN2	FISNACHT	h2tg000201l	5081
CGN	CGN2	FISNACHT	h2tg000202l	6235
CGN	CGN2	FISNACHT	h2tg000203l	6485
CGN	CGN2	FISNACHT	h2tg000204l	6404
CGN	CGN2	FISNACHT	h2tg000205l	6783
CGN	CGN2	FISNACHT	h2tg000208l	5908
CGN	CGN2	FISNACHT	h2tg000210l	5274
CGN	CGN2	FISNACHT	h2tg000214l	5496
CGN	CGN2	FISNACHT	h2tg000216l	6199
CGN	CGN2	FISNACHT	h2tg000217l	5801
CGN	CGN2	FISNACHT	h2tg000218l	4822
CGN	CGN2	FISNACHT	h2tg000219l	5087
CGN	CGN2	FISNACHT	h2tg000220l	6187
CGN	CGN2	FISNACHT	h2tg000222l	6050
CGN	CGN2	FISNACHT	h2tg000225l	5477
CGN	CGN2	FISNACHT	h2tg000226l	8765
CGN	CGN2	FISNACHT	h2tg000227l	6571
CGN	CGN2	FISNACHT	h2tg000228l	5948
CGN	CGN2	FISNACHT	h2tg000229l	5795
CGN	CGN2	FISNACHT	h2tg000230l	5249
CGN	CGN2	FISNACHT	h2tg000232l	4803
CGN	CGN2	FISNACHT	h2tg000233l	4988
CGN	CGN2	FISNACHT	h2tg000236l	6514
CGN	CGN2	FISNACHT	h2tg000238l	4079
CGN	CGN2	FISNACHT	h2tg000240l	5405
CGN	CGN2	FISNACHT	h2tg000241l	5285
CGN	CGN2	FISNACHT	h2tg000242l	5234
CGN	CGN2	FISNACHT	h2tg000243l	4787
CGN	CGN2	FISNACHT	h2tg000245l	5776
CGN	CGN2	FISNACHT	h2tg000246l	4370
CGN	CGN2	FISNACHT	h2tg000247l	6266
CGN	CGN2	FISNACHT	h2tg000249l	5964
CGN	CGN2	FISNACHT	h2tg000251l	4947
CGN	CGN2	FISNACHT	h2tg000254l	7515
CGN	CGN2	FISNACHT	h2tg000256l	5550
CGN	CGN2	FISNACHT	h2tg000257l	3761
CGN	CGN2	FISNACHT	h2tg000259l	5277
CGN	CGN3	FISNACHT	h1tg000006l	5851
CGN	CGN3	FISNACHT	h1tg000008l	5147
CGN	CGN3	FISNACHT	h1tg000010l	5928
CGN	CGN3	FISNACHT	h1tg000011l	6342
CGN	CGN3	FISNACHT	h1tg000012l	5611
CGN	CGN3	FISNACHT	h1tg000013l	10778
CGN	CGN3	FISNACHT	h1tg000014l	8015
CGN	CGN3	FISNACHT	h1tg000017l	4521
CGN	CGN3	FISNACHT	h1tg000021l	6026
CGN	CGN3	FISNACHT	h1tg000024l	5365
CGN	CGN3	FISNACHT	h1tg000025l	5000
CGN	CGN3	FISNACHT	h1tg000030l	7120
CGN	CGN3	FISNACHT	h1tg000036l	5826
CGN	CGN3	FISNACHT	h1tg000038l	8302
CGN	CGN3	FISNACHT	h1tg000046l	8612
CGN	CGN3	FISNACHT	h1tg000047l	4571
CGN	CGN3	FISNACHT	h1tg000051l	7397
CGN	CGN3	FISNACHT	h1tg000052l	5701
CGN	CGN3	FISNACHT	h1tg000054l	6179
CGN	CGN3	FISNACHT	h1tg000055l	5787
CGN	CGN3	FISNACHT	h1tg000056l	6337
CGN	CGN3	FISNACHT	h1tg000057l	4432
CGN	CGN3	FISNACHT	h1tg000060l	5876
CGN	CGN3	FISNACHT	h1tg000061l	4766
CGN	CGN3	FISNACHT	h1tg000062l	7071
CGN	CGN3	FISNACHT	h1tg000064l	5120
CGN	CGN3	FISNACHT	h1tg000065l	7518
CGN	CGN3	FISNACHT	h1tg000066l	6121
CGN	CGN3	FISNACHT	h1tg000067l	6627
CGN	CGN3	FISNACHT	h1tg000068l	5955
CGN	CGN3	FISNACHT	h1tg000071l	5907
CGN	CGN3	FISNACHT	h1tg000073l	6108
CGN	CGN3	FISNACHT	h1tg000074l	6241
CGN	CGN3	FISNACHT	h1tg000075l	4250
CGN	CGN3	FISNACHT	h1tg000076l	5077
CGN	CGN3	FISNACHT	h1tg000077l	3876
CGN	CGN3	FISNACHT	h1tg000080l	5295
CGN	CGN3	FISNACHT	h1tg000081l	6643
CGN	CGN3	FISNACHT	h1tg000082l	7456
CGN	CGN3	FISNACHT	h1tg000083l	5820
CGN	CGN3	FISNACHT	h1tg000085l	6193
CGN	CGN3	FISNACHT	h1tg000087l	5668
CGN	CGN3	FISNACHT	h1tg000089l	6092
CGN	CGN3	FISNACHT	h1tg000090l	5894
CGN	CGN3	FISNACHT	h1tg000091l	9303
CGN	CGN3	FISNACHT	h1tg000096l	5875
CGN	CGN3	FISNACHT	h1tg000097l	10905
CGN	CGN3	FISNACHT	h1tg000099l	5839
CGN	CGN3	FISNACHT	h1tg000100l	5634
CGN	CGN3	FISNACHT	h1tg000101l	7018
CGN	CGN3	FISNACHT	h1tg000102l	5757
CGN	CGN3	FISNACHT	h1tg000106l	6658
CGN	CGN3	FISNACHT	h1tg000107l	6142
CGN	CGN3	FISNACHT	h1tg000109l	4648
CGN	CGN3	FISNACHT	h1tg000110l	5052
CGN	CGN3	FISNACHT	h1tg000111l	5124
CGN	CGN3	FISNACHT	h1tg000112l	4606
CGN	CGN3	FISNACHT	h1tg000113l	7192
CGN	CGN3	FISNACHT	h1tg000114l	4652
CGN	CGN3	FISNACHT	h1tg000117l	7604
CGN	CGN3	FISNACHT	h1tg000119l	6625
CGN	CGN3	FISNACHT	h1tg000120l	6233
CGN	CGN3	FISNACHT	h1tg000121l	3554
CGN	CGN3	FISNACHT	h1tg000124l	5439
CGN	CGN3	FISNACHT	h1tg000126l	4377
CGN	CGN3	FISNACHT	h1tg000127l	8243
CGN	CGN3	FISNACHT	h1tg000129l	6120
CGN	CGN3	FISNACHT	h1tg000131l	8494
CGN	CGN3	FISNACHT	h1tg000135l	5544
CGN	CGN3	FISNACHT	h1tg000137l	8285
CGN	CGN3	FISNACHT	h1tg000138l	6407
CGN	CGN3	FISNACHT	h1tg000139l	4511
CGN	CGN3	FISNACHT	h1tg000145l	6225
CGN	CGN3	FISNACHT	h1tg000150l	5494
CGN	CGN3	FISNACHT	h1tg000151l	4921
CGN	CGN3	FISNACHT	h1tg000153l	5870
CGN	CGN3	FISNACHT	h1tg000157l	4165
CGN	CGN3	FISNACHT	h1tg000158l	5531
CGN	CGN3	FISNACHT	h1tg000159l	5448
CGN	CGN3	FISNACHT	h1tg000161l	5707
CGN	CGN3	FISNACHT	h1tg000165l	7580
CGN	CGN3	FISNACHT	h1tg000167l	3045
CGN	CGN3	FISNACHT	h1tg000168l	5874
CGN	CGN3	FISNACHT	h1tg000174l	6167
CGN	CGN3	FISNACHT	h1tg000176l	3883
CGN	CGN3	FISNACHT	h1tg000177l	6147
CGN	CGN3	FISNACHT	h1tg000182l	5702
CGN	CGN3	FISNACHT	h1tg000183l	5052
CGN	CGN3	FISNACHT	h1tg000184l	6288
CGN	CGN3	FISNACHT	h1tg000185l	5351
CGN	CGN3	FISNACHT	h1tg000186l	6250
CGN	CGN3	FISNACHT	h1tg000187l	4917
CGN	CGN3	FISNACHT	h1tg000189l	6036
CGN	CGN3	FISNACHT	h1tg000192l	6495
CGN	CGN3	FISNACHT	h1tg000193l	5582
CGN	CGN3	FISNACHT	h1tg000198l	5527
CGN	CGN3	FISNACHT	h1tg000199l	5703
CGN	CGN3	FISNACHT	h1tg000200l	5260
CGN	CGN3	FISNACHT	h1tg000201l	6491
CGN	CGN3	FISNACHT	h1tg000202l	3957
CGN	CGN3	FISNACHT	h1tg000204l	4781
CGN	CGN3	FISNACHT	h1tg000205l	8682
CGN	CGN3	FISNACHT	h1tg000207l	6295
CGN	CGN3	FISNACHT	h1tg000209l	5636
CGN	CGN3	FISNACHT	h1tg000210l	6447
CGN	CGN3	FISNACHT	h1tg000213l	4772
CGN	CGN3	FISNACHT	h1tg000214l	4498
CGN	CGN3	FISNACHT	h1tg000217l	6228
CGN	CGN3	FISNACHT	h1tg000219l	5297
CGN	CGN3	FISNACHT	h1tg000220l	6699
CGN	CGN3	FISNACHT	h1tg000222l	5839
CGN	CGN3	FISNACHT	h1tg000223l	5641
CGN	CGN3	FISNACHT	h1tg000225l	5517
CGN	CGN3	FISNACHT	h1tg000226l	6144
CGN	CGN3	FISNACHT	h1tg000228l	5430
CGN	CGN3	FISNACHT	h1tg000231l	6375
CGN	CGN3	FISNACHT	h1tg000235l	5835
CGN	CGN3	FISNACHT	h1tg000238l	3823
CGN	CGN3	FISNACHT	h1tg000239l	6035
CGN	CGN3	FISNACHT	h1tg000241l	5531
CGN	CGN3	FISNACHT	h1tg000244l	4610
CGN	CGN3	FISNACHT	h1tg000249l	5382
CGN	CGN3	FISNACHT	h1tg000250l	5584
[truncated: 63,536 more rows]

## Sheet: fig2S1_read_percentages
Population	Fish	ccs_Reads	NLR_Reads	NLR_Percent	OtherTarget_Reads	OtherTarget_Percent	Unmapped_Reads	Unmapped_Percent
TU	TU01	18886	8500	45	2207	11.6	50	0.2
TU	TU02	17606	7925	45	2035	11.5	70	0.3
TU	TU03	24125	10907	45.2	2819	11.6	106	0.4
TU	TU06	26990	12450	46.1	3197	11.8	91	0.3
TU	TU08	12495	1325	10.6	292	2.3	76	0.6
TU	TU10	9358	1634	17.4	376	4	104	1.1
TU	TU12	5338	995	18.6	218	4	29	0.5
TU	TU14	8028	1462	18.2	338	4.2	53	0.6
CGN	CGN1	18935	9137	48.2	2354	12.4	129	0.6
CGN	CGN2	12851	6396	49.7	1617	12.5	94	0.7
CGN	CGN3	11853	5758	48.5	1444	12.1	93	0.7
CGN	CGN4	17235	8507	49.3	2048	11.8	138	0.8
CGN	CGN5	26914	12871	47.8	3624	13.4	206	0.7
CGN	CGN6	26200	12470	47.5	3628	13.8	209	0.7
CGN	CGN7	23001	10919	47.4	2940	12.7	175	0.7
CGN	CGN8	24546	11694	47.6	3371	13.7	195	0.7
DP	DP03	790	329	41.6	107	13.5	3	0.3
DP	DP05	8166	3453	42.2	1091	13.3	99	1.2
DP	DP07	44471	17771	39.9	4950	11.1	185	0.4
DP	DP09	26848	10051	37.4	3168	11.7	170	0.6
DP	DP10	25214	9779	38.7	2957	11.7	126	0.4
DP	DP12	29932	11526	38.5	3436	11.4	132	0.4
DP	DP13	9091	3906	42.9	1069	11.7	163	1.7
DP	DP15	8683	3505	40.3	1080	12.4	134	1.5
DP	DP16	10686	4773	44.6	1321	12.3	141	1.3
DP	DP20	143954	54628	37.9	20603	14.3	1857	1.2
DP	DP21	12269	4893	39.8	1899	15.4	211	1.7
DP	DP23	8313	3157	37.9	926	11.1	134	1.6
DP	DP24	7376	2733	37	955	12.9	83	1.1
DP	DP25	8658	3146	36.3	1094	12.6	210	2.4
DP	DP28	20187	7546	37.3	3004	14.8	211	1
DP	DP29	9913	3930	39.6	1436	14.4	95	0.9
DP	DP31	7555	2835	37.5	974	12.8	129	1.7
DP	DP32	13210	5758	43.5	1465	11	278	2.1
DP	DP33	7764	2925	37.6	1070	13.7	115	1.4
DP	DP34	4612	1815	39.3	660	14.3	46	0.9
KG	KG03	43957	18949	43.1	4116	9.3	1052	2.3
KG	KG05	42564	18238	42.8	3645	8.5	1119	2.6
KG	KG07	60852	25932	42.6	5713	9.3	1509	2.4
KG	KG12	36727	14054	38.2	2873	7.8	1059	2.8
KG	KG14	32824	13114	39.9	2871	8.7	866	2.6
KG	KG15	32297	13336	41.2	2785	8.6	889	2.7
KG	KG18	44678	20623	46.1	3980	8.9	866	1.9
KG	KG19	27109	10582	39	2580	9.5	704	2.5
KG	KG20	37385	15685	41.9	4175	11.1	715	1.9
KG	KG22	45094	18074	40	4530	10	1215	2.6
KG	KG24	50191	21205	42.2	4288	8.5	1470	2.9
KG	KG26	39644	16788	42.3	3284	8.2	896	2.2
KG	KG29	42213	19296	45.7	3912	9.2	1270	3
KG	KG32	33860	14672	43.3	2995	8.8	910	2.6
KG	KG33	57148	25363	44.3	5276	9.2	1123	1.9
KG	KG35	37160	13745	36.9	4038	10.8	188	0.5
KG	KG41	18606	6847	36.7	2070	11.1	89	0.4
KG	KG42	17986	6963	38.7	2097	11.6	90	0.5
KG	KG43	26969	10186	37.7	2836	10.5	136	0.5
KG	KG44	32098	12980	40.4	3473	10.8	681	2.1
SN	SN03	129537	52660	40.6	19645	15.1	1973	1.5
SN	SN04	63760	26414	41.4	8649	13.5	895	1.4
SN	SN08	43631	18179	41.6	5769	13.2	637	1.4
SN	SN09	55884	23106	41.3	7795	13.9	801	1.4
SN	SN10	111227	45389	40.8	15630	14	1674	1.5
SN	SN11	55034	23536	42.7	7263	13.1	859	1.5
SN	SN12	30486	12990	42.6	4181	13.7	488	1.6
SN	SN13	66059	26705	40.4	10137	15.3	1043	1.5
SN	SN14	94355	39571	41.9	13200	13.9	1558	1.6
SN	SN15	114889	49817	43.3	17350	15.1	1636	1.4
SN	SN16	106075	42506	40	19367	18.2	1572	1.4
SN	SN17	75794	31555	41.6	10244	13.5	1369	1.8
SN	SN18	108626	46279	42.6	15864	14.6	1666	1.5
SN	SN19	92966	41512	44.6	12889	13.8	1565	1.6
SN	SN20	122603	56572	46.1	17411	14.2	1651	1.3
SN	SN21	51335	20118	39.1	6077	11.8	452	0.8
SN	SN23	92094	35516	38.5	10885	11.8	665	0.7
SN	SN24	222595	97327	43.7	36737	16.5	2876	1.2
SN	SN26	59689	23640	39.6	7228	12.1	453	0.7
CHT	CHT01	78648	29431	37.4	9431	11.9	1482	1.8
CHT	CHT02	142018	47976	33.7	18280	12.8	2719	1.9
CHT	CHT03	102969	37971	36.8	12611	12.2	1910	1.8
CHT	CHT04	117377	41930	35.7	13448	11.4	2130	1.8
CHT	CHT05	75181	28780	38.2	9032	12	1349	1.7
CHT	CHT06	117936	41744	35.3	13587	11.5	2592	2.1
CHT	CHT07	80986	27295	33.7	9064	11.1	1721	2.1
CHT	CHT08	90855	32821	36.1	11137	12.2	1544	1.6
CHT	CHT10	85293	32882	38.5	9792	11.4	1499	1.7
CHT	CHT11	87768	33623	38.3	10376	11.8	1531	1.7
CHT	CHT12	79771	29500	36.9	9613	12	1379	1.7
CHT	CHT14	9953	4054	40.7	1095	11	274	2.7
CHT	CHT15	52384	19101	36.4	6585	12.5	927	1.7
CHT	CHT16	144266	51565	35.7	17713	12.2	3679	2.5
CHT	CHT19	39048	10085	25.8	3937	10	10226	26.1
CHT	CHT23	49949	15717	31.4	6767	13.5	735	1.4
CHT	CHT26	69193	24032	34.7	7186	10.3	1425	2
CHT	CHT28	57095	19861	34.7	8718	15.2	643	1.1

## Sheet: fig2S2_mapping_ratios
Population	Exon	Mapping_Ratio
TU	FISNACHT	0.742
TU	NLR_B30.2	0.745
CGN	FISNACHT	0.622
CGN	NLR_B30.2	0.575
DP	FISNACHT	0.51
DP	NLR_B30.2	0.512
KG	FISNACHT	0.503
KG	NLR_B30.2	0.461
SN	FISNACHT	0.506
SN	NLR_B30.2	0.466
CHT	FISNACHT	0.499
CHT	NLR_B30.2	0.495

## Sheet: fig2S2_orthocluster_mapping
Cluster	Exon	Mapping_Quality	NACHT_Group
2	FISNACHT	1	1
3	FISNACHT	60	1
5	FISNACHT	1	1
6	FISNACHT	60	1
8	FISNACHT	60	1
24	FISNACHT	31	1
25	FISNACHT	1	1
31	FISNACHT	60	2
34	FISNACHT	1	2
35	FISNACHT	60	2
36	FISNACHT	60	2
37	FISNACHT	60	2
39	FISNACHT	60	2
40	FISNACHT	1	2
41	FISNACHT	60	2
42	FISNACHT	1	2
43	FISNACHT	60	2
44	FISNACHT	60	2
48	FISNACHT	27	2
51	FISNACHT	1	2
52	FISNACHT	55	2
54	FISNACHT	60	2
57	FISNACHT	8	2
59	FISNACHT	60	2
60	FISNACHT	1	2
61	FISNACHT	60	2
62	FISNACHT	60	2
63	FISNACHT	28	2
66	FISNACHT	60	2
68	FISNACHT	1	2
71	FISNACHT	60	2
72	FISNACHT	60	2
74	FISNACHT	34	2
76	FISNACHT	60	2
78	FISNACHT	60	2
79	FISNACHT	12	2
84	FISNACHT	56	3
85	FISNACHT	60	3
86	FISNACHT	60	3
91	FISNACHT	1	3
92	FISNACHT	60	3
93	FISNACHT	20	3
95	FISNACHT	1	3
96	FISNACHT	60	3
97	FISNACHT	60	3
200	FISNACHT	1	1
208	FISNACHT	60	1
220	FISNACHT	35	2
223	FISNACHT	1	2
225	FISNACHT	60	2
231	FISNACHT	7	2
235	FISNACHT	60	2
237	FISNACHT	25	2
241	FISNACHT	1	2
245	FISNACHT	60	2
248	FISNACHT	60	2
250	FISNACHT	22	2
259	FISNACHT	58	2
263	FISNACHT	20	2
283	FISNACHT	60	3
285	FISNACHT	60	3
288	FISNACHT	55	3
293	FISNACHT	56	3
298	FISNACHT	60	3
311	FISNACHT	60	3
315	FISNACHT	60	3
318	FISNACHT	1	3
325n	FISNACHT	60	2
332	FISNACHT	60	3
337	FISNACHT	60	3
338	FISNACHT	9	3
339	FISNACHT	1	4
341	FISNACHT	60	4
343	FISNACHT	60	4
344	FISNACHT	60	4
350	FISNACHT	1	4
353	FISNACHT	60	4
357	FISNACHT	39	4
357n	FISNACHT	1	3
360	FISNACHT	60	1
363	FISNACHT	16	1
371	FISNACHT	60	1
372	FISNACHT	60	1
375	FISNACHT	10	1
379	FISNACHT	16	1
380	FISNACHT	1	1
381	FISNACHT	1	1
387	FISNACHT	60	2
394	FISNACHT	1	2
396	FISNACHT	60	2
397	FISNACHT	60	2
398	FISNACHT	60	2
399	FISNACHT	1	2
400	FISNACHT	28	2
403	FISNACHT	60	2
404	FISNACHT	60	2
406	FISNACHT	1	2
407	FISNACHT	60	2
411	FISNACHT	60	2
413	FISNACHT	60	2
414	FISNACHT	1	2
416	FISNACHT	1	2
418	FISNACHT	60	2
419	FISNACHT	52	2
422	FISNACHT	60	2
423	FISNACHT	16	2
424	FISNACHT	60	2
426	FISNACHT	60	2
427	FISNACHT	60	2
428	FISNACHT	60	2
429	FISNACHT	1	2
431	FISNACHT	1	2
433	FISNACHT	48	2
437	FISNACHT	1	2
438	FISNACHT	60	2
443	FISNACHT	1	2
446	FISNACHT	60	2
460	FISNACHT	8	3
464	FISNACHT	60	3
466	FISNACHT	60	3
469	FISNACHT	60	3
483	FISNACHT	59	3
486	FISNACHT	60	3
488	FISNACHT	60	3
490	FISNACHT	60	3
493	FISNACHT	60	3
496	FISNACHT	60	3
510	FISNACHT	60	3
512	FISNACHT	60	3
516	FISNACHT	13	3
528	FISNACHT	60	3
534	FISNACHT	60	4
539	FISNACHT	60	4
541	FISNACHT	60	4
542	FISNACHT	60	4
544	FISNACHT	60	4
558	FISNACHT	60	1
561	FISNACHT	38	1
562	FISNACHT	60	1
564	FISNACHT	60	1
575	FISNACHT	None	1
576	FISNACHT	60	1
577	FISNACHT	60	1
579	FISNACHT	60	1
580	FISNACHT	1	1
587	FISNACHT	60	2
590	FISNACHT	60	2
591	FISNACHT	1	2
592	FISNACHT	60	2
596	FISNACHT	60	2
601n	FISNACHT	60	3
605	FISNACHT	1	2
608	FISNACHT	60	2
612	FISNACHT	60	2
613	FISNACHT	60	2
617	FISNACHT	37	2
623	FISNACHT	1	2
627	FISNACHT	60	2
630	FISNACHT	60	2
632	FISNACHT	60	2
635	FISNACHT	60	2
650	FISNACHT	60	3
651	FISNACHT	1	3
652	FISNACHT	22	3
656	FISNACHT	60	3
661	FISNACHT	1	3
666	FISNACHT	60	3
671	FISNACHT	50	3
677	FISNACHT	60	3
681	FISNACHT	60	3
684	FISNACHT	1	3
686	FISNACHT	1	3
687	FISNACHT	60	3
691	FISNACHT	1	3
694	FISNACHT	1	3
698	FISNACHT	60	3
723	FISNACHT	60	3
727	FISNACHT	1	3
744	FISNACHT	60	4
745	FISNACHT	60	4
749	FISNACHT	47	4
772	FISNACHT	60	1
779	FISNACHT	60	1
790	FISNACHT	60	2
796	FISNACHT	60	2
805	FISNACHT	60	2
806	FISNACHT	60	2
807	FISNACHT	30	2
809	FISNACHT	1	2
843	FISNACHT	60	2
844	FISNACHT	60	2
850	FISNACHT	60	2
862	FISNACHT	60	3
868	FISNACHT	60	3
892	FISNACHT	None	3
904	FISNACHT	60	3
936	FISNACHT	60	3
946	FISNACHT	60	3
949	FISNACHT	60	4
952	FISNACHT	60	4
954	FISNACHT	60	4
956	FISNACHT	3	4
956n	FISNACHT	60	1
957	FISNACHT	60	4
961	FISNACHT	60	4
962	FISNACHT	60	4
976	FISNACHT	60	1
980n	FISNACHT	60	3
986	FISNACHT	60	1
1009n	FISNACHT	1	3
1039n	FISNACHT	60	2
1231n	FISNACHT	60	3
1288n	FISNACHT	60	4
1367n	FISNACHT	60	1
1449n	FISNACHT	60	3
1488n	FISNACHT	60	3
1849n	FISNACHT	60	4
1855n	FISNACHT	60	3
2001	FISNACHT	1	1
2003	FISNACHT	40	1
2005	FISNACHT	1	1
2009	FISNACHT	60	1
2016	FISNACHT	1	2
2023	FISNACHT	60	2
2026	FISNACHT	1	2
2032	FISNACHT	1	2
2034	FISNACHT	60	2
2035	FISNACHT	50	2
2036	FISNACHT	1	2
2038	FISNACHT	42	2
2041	FISNACHT	60	2
2042	FISNACHT	60	2
2044	FISNACHT	20	2
2045	FISNACHT	1	2
2049	FISNACHT	56	2
2050	FISNACHT	60	2
2056	FISNACHT	7	2
2057	FISNACHT	30	2
2060	FISNACHT	60	2
2067	FISNACHT	60	2
2069	FISNACHT	60	2
2070	FISNACHT	60	2
2076	FISNACHT	60	2
2085	FISNACHT	34	2
2087	FISNACHT	50	2
2090	FISNACHT	10	2
2173n	FISNACHT	1	2
2200	FISNACHT	60	3
2203	FISNACHT	60	3
2204	FISNACHT	60	3
2208	FISNACHT	6	3
2211	FISNACHT	60	3
2215	FISNACHT	60	3
2223	FISNACHT	60	3
2229	FISNACHT	60	3
2232	FISNACHT	1	3
2238	FISNACHT	1	3
2239	FISNACHT	1	3
2242	FISNACHT	60	3
2244	FISNACHT	1	3
2255	FISNACHT	60	3
2260	FISNACHT	60	3
2271	FISNACHT	2	3
2272	FISNACHT	18	3
2276	FISNACHT	4	3
2277	FISNACHT	60	3
2282	FISNACHT	60	3
2284	FISNACHT	1	3
2287n	FISNACHT	60	2
2289	FISNACHT	1	3
2296	FISNACHT	1	4
2299	FISNACHT	1	4
2300	FISNACHT	60	4
2304	FISNACHT	60	4
2305	FISNACHT	60	4
2311	FISNACHT	60	4
2312	FISNACHT	1	4
2315	FISNACHT	60	4
2324	FISNACHT	44	4
2330	FISNACHT	60	4
2333	FISNACHT	1	4
2334	FISNACHT	60	4
2335	FISNACHT	60	4
2339	FISNACHT	48	4
2342	FISNACHT	60	4
2349	FISNACHT	60	1
2354	FISNACHT	12	1
2356	FISNACHT	60	1
2370	FISNACHT	1	1
2391	FISNACHT	60	1
2392	FISNACHT	1	1
2398	FISNACHT	1	1
2400	FISNACHT	1	1
2401	FISNACHT	1	1
2405	FISNACHT	59	1
2411	FISNACHT	1	2
2413	FISNACHT	1	2
2417	FISNACHT	60	2
2426	FISNACHT	1	2
2427	FISNACHT	60	2
2430n	FISNACHT	60	3
2431	FISNACHT	60	2
2434	FISNACHT	60	2
2442	FISNACHT	1	2
2443	FISNACHT	56	2
2445	FISNACHT	45	2
2445n	FISNACHT	60	3
2447	FISNACHT	1	2
2466	FISNACHT	1	2
2471	FISNACHT	5	2
2481	FISNACHT	60	2
2486	FISNACHT	1	2
2487	FISNACHT	60	2
2493	FISNACHT	22	2
2502	FISNACHT	1	2
2504	FISNACHT	60	2
2530	FISNACHT	34	2
2531	FISNACHT	60	3
2546	FISNACHT	60	3
2547	FISNACHT	49	3
2548	FISNACHT	2	3
2551	FISNACHT	47	3
2553	FISNACHT	11	3
2560	FISNACHT	60	3
2565	FISNACHT	60	3
2566	FISNACHT	2	3
2572	FISNACHT	60	3
2577	FISNACHT	1	3
2584	FISNACHT	1	3
2589	FISNACHT	1	3
2625	FISNACHT	60	3
2627	FISNACHT	60	3
2628	FISNACHT	60	3
2630	FISNACHT	1	3
2631	FISNACHT	43	3
2632	FISNACHT	60	3
2636	FISNACHT	1	3
2637	FISNACHT	1	3
2648	FISNACHT	1	3
2655	FISNACHT	1	3
2659	FISNACHT	60	3
2673	FISNACHT	37	3
2683	FISNACHT	26	3
2815	FISNACHT	1	2
2833	FISNACHT	60	2
2844n	FISNACHT	38	4
2866	FISNACHT	56	2
2868	FISNACHT	1	2
2877	FISNACHT	36	2
2878n	FISNACHT	60	3
2879	FISNACHT	5	2
2886	FISNACHT	60	2
2922	FISNACHT	60	3
2924	FISNACHT	30	3
2929	FISNACHT	60	3
2934	FISNACHT	60	3
2937	FISNACHT	60	3
2944n	FISNACHT	60	3
2945	FISNACHT	22	3
2992	FISNACHT	60	3
3041n	FISNACHT	60	3
3100	FISNACHT	52	2
3108	FISNACHT	60	2
3121	FISNACHT	60	2
3124	FISNACHT	60	2
3125	FISNACHT	1	2
3126	FISNACHT	1	2
3128	FISNACHT	60	2
3149	FISNACHT	60	2
3152	FISNACHT	60	2
3173	FISNACHT	54	2
3177	FISNACHT	7	2
3183	FISNACHT	60	2
3197	FISNACHT	60	2
3331	FISNACHT	60	4
3338	FISNACHT	1	1
3345	FISNACHT	60	1
3346	FISNACHT	60	1
3347	FISNACHT	11	1
3350	FISNACHT	51	1
3362	FISNACHT	60	1
3371	FISNACHT	22	1
3382	FISNACHT	23	1
3401	FISNACHT	1	1
3428	FISNACHT	60	2
3429	FISNACHT	46	2
3438	FISNACHT	60	2
3455	FISNACHT	15	2
3478	FISNACHT	60	2
3479	FISNACHT	1	2
3488	FISNACHT	2	2
3531	FISNACHT	18	3
3536	FISNACHT	9	3
3546	FISNACHT	6	3
3547	FISNACHT	60	3
3548	FISNACHT	60	3
3553	FISNACHT	60	3
3556	FISNACHT	60	3
3564	FISNACHT	14	3
3566	FISNACHT	60	3
3572	FISNACHT	60	3
3595	FISNACHT	60	3
3602	FISNACHT	1	3
3605	FISNACHT	60	3
3633	FISNACHT	1	3
3645	FISNACHT	1	3
3661	FISNACHT	60	4
3662	FISNACHT	60	4
3690	FISNACHT	60	4
3704	FISNACHT	60	1
3718	FISNACHT	0	1
3725	FISNACHT	60	1
3728	FISNACHT	1	1
3733	FISNACHT	35	2
3743	FISNACHT	60	2
3746	FISNACHT	60	2
3750	FISNACHT	1	2
3751	FISNACHT	23	2
3757	FISNACHT	11	2
3795	FISNACHT	1	2
3808	FISNACHT	1	3
3810	FISNACHT	60	3
3819	FISNACHT	39	3
3844	FISNACHT	1	3
3860	FISNACHT	60	3
3865	FISNACHT	1	3
3877	FISNACHT	1	4
3879	FISNACHT	56	4
3903	FISNACHT	1	4
3931	FISNACHT	60	1
3950	FISNACHT	60	2
3960	FISNACHT	1	2
3969	FISNACHT	60	2
3971	FISNACHT	1	2
3978	FISNACHT	1	2
3979	FISNACHT	51	2
3981	FISNACHT	60	2
3991	FISNACHT	30	2
4001	FISNACHT	1	2
4007	FISNACHT	60	2
4013	FISNACHT	1	2
4015	FISNACHT	1	2
4038	FISNACHT	25	3
4040	FISNACHT	25	3
4048	FISNACHT	1	3
4060	FISNACHT	60	3
4061	FISNACHT	60	3
4068	FISNACHT	60	3
4074	FISNACHT	1	3
4075	FISNACHT	60	3
4078	FISNACHT	60	3
4086	FISNACHT	1	3
4087	FISNACHT	1	3
4112	FISNACHT	60	4
4116	FISNACHT	1	4
4127	FISNACHT	1	1
4132	FISNACHT	60	1
4136	FISNACHT	60	1
4144	FISNACHT	60	1
4145	FISNACHT	42	1
4163	FISNACHT	7	1
4170	FISNACHT	60	2
4173	FISNACHT	60	2
4174	FISNACHT	60	2
4185	FISNACHT	1	2
4197	FISNACHT	22	2
4198	FISNACHT	1	2
4202	FISNACHT	1	2
4235	FISNACHT	54	2
4240	FISNACHT	60	3
4242	FISNACHT	13	3
4269	FISNACHT	1	3
4285	FISNACHT	60	3
4293	FISNACHT	23	3
4344	FISNACHT	60	4
4377	FISNACHT	8	1
4397	FISNACHT	60	1
4399	FISNACHT	60	1
4408	FISNACHT	1	2
4439	FISNACHT	1	2
4457	FISNACHT	5	2
4460	FISNACHT	60	2
4466	FISNACHT	60	2
4480	FISNACHT	60	2
4494n	FISNACHT	60	1
4530n	FISNACHT	60	4
4626	FISNACHT	1	1
4627	FISNACHT	2	1
4642	FISNACHT	7	1
4651n	FISNACHT	60	multiple
4658	FISNACHT	1	2
4673	FISNACHT	8	2
4675	FISNACHT	60	2
4800	FISNACHT	60	4
4809	FISNACHT	13	4
4820	FISNACHT	1	1
4833	FISNACHT	60	3
4835	FISNACHT	60	3
4859	FISNACHT	1	1
4860	FISNACHT	3	1
4864	FISNACHT	2	1
4872	FISNACHT	1	2
4882	FISNACHT	1	2
4914	FISNACHT	60	2
4932	FISNACHT	12	2
4946	FISNACHT	1	3
4951	FISNACHT	60	3
4968	FISNACHT	2	3
4986	FISNACHT	60	3
4990	FISNACHT	1	3
5068n	FISNACHT	60	3
5111	FISNACHT	1	2
5122	FISNACHT	40	2
5182	FISNACHT	55	2
5186	FISNACHT	17	2
5228	FISNACHT	60	multiple
5237	FISNACHT	1	3
5241	FISNACHT	10	3
5249	FISNACHT	1	3
5252	FISNACHT	60	3
5258	FISNACHT	1	3
5265	FISNACHT	59	3
5283	FISNACHT	60	3
5292	FISNACHT	1	3
5294	FISNACHT	50	3
5301	FISNACHT	60	3
5312	FISNACHT	60	3
5317	FISNACHT	10	3
5322	FISNACHT	60	3
5326	FISNACHT	8	3
5341n	FISNACHT	1	2
5347	FISNACHT	28	4
5367	FISNACHT	35	4
5367n	FISNACHT	60	4
5369	FISNACHT	2	4
5385	FISNACHT	60	1
5391	FISNACHT	8	multiple
5399	FISNACHT	15	1
5401	FISNACHT	60	multiple
5403	FISNACHT	60	2
5405	FISNACHT	6	2
5410	FISNACHT	36	2
5411	FISNACHT	60	2
5413	FISNACHT	13	2
5416	FISNACHT	1	2
5421	FISNACHT	1	2
5423	FISNACHT	9	2
5425	FISNACHT	1	2
5441	FISNACHT	60	2
5442	FISNACHT	60	2
5444	FISNACHT	51	2
5445	FISNACHT	60	2
5448	FISNACHT	1	2
5451	FISNACHT	30	2
5453	FISNACHT	1	2
5456	FISNACHT	60	2
5463	FISNACHT	60	3
5465	FISNACHT	60	3
5469	FISNACHT	60	3
5492	FISNACHT	1	3
5499	FISNACHT	60	3
5501	FISNACHT	12	3
5525	FISNACHT	60	4
5527	FISNACHT	1	4
5528	FISNACHT	60	4
5534	FISNACHT	2	4
5537	FISNACHT	60	4
5538	FISNACHT	60	4
5539	FISNACHT	1	4
5543	FISNACHT	60	1
5551	FISNACHT	44	1
5556	FISNACHT	60	1
5557	FISNACHT	9	1
5558	FISNACHT	1	1
5561	FISNACHT	1	1
5562	FISNACHT	1	1
5563	FISNACHT	60	1
5571	FISNACHT	1	1
5572	FISNACHT	60	2
5573	FISNACHT	60	2
5579	FISNACHT	60	2
5580	FISNACHT	60	2
5581	FISNACHT	60	2
5582	FISNACHT	1	2
5590	FISNACHT	1	2
5592	FISNACHT	7	2
5595	FISNACHT	1	2
5598	FISNACHT	54	2
5599	FISNACHT	60	2
5600	FISNACHT	38	2
5604	FISNACHT	60	2
5606	FISNACHT	51	2
5608	FISNACHT	58	2
5610	FISNACHT	1	2
5615	FISNACHT	60	2
5617	FISNACHT	1	2
5622	FISNACHT	60	2
5624	FISNACHT	1	2
5626	FISNACHT	60	2
5628	FISNACHT	2	2
5631	FISNACHT	29	2
5638	FISNACHT	60	2
5644	FISNACHT	60	3
5645	FISNACHT	17	3
5646	FISNACHT	60	3
5647	FISNACHT	60	3
5649	FISNACHT	60	3
5659	FISNACHT	60	3
5661	FISNACHT	1	3
5664	FISNACHT	1	3
5666	FISNACHT	60	3
5668	FISNACHT	60	3
5674	FISNACHT	1	3
5682	FISNACHT	1	3
5685	FISNACHT	1	3
5687	FISNACHT	60	3
5697	FISNACHT	28	3
5702	FISNACHT	1	3
5723	FISNACHT	60	4
5725	FISNACHT	60	4
5728	FISNACHT	60	4
5730	FISNACHT	1	4
5731	FISNACHT	60	4
5734	FISNACHT	58	4
5753	FISNACHT	1	1
5755	FISNACHT	41	1
5757	FISNACHT	60	1
5759	FISNACHT	1	1
5764	FISNACHT	1	1
5775	FISNACHT	19	1
5777	FISNACHT	18	2
5779	FISNACHT	24	2
5787	FISNACHT	60	2
5792	FISNACHT	60	2
5796	FISNACHT	23	2
5806	FISNACHT	60	2
5812	FISNACHT	60	2
5813	FISNACHT	60	2
5815	FISNACHT	None	2
5817	FISNACHT	1	2
5826	FISNACHT	60	2
5832	FISNACHT	60	2
5835	FISNACHT	60	2
5836	FISNACHT	1	2
5837	FISNACHT	60	2
5845	FISNACHT	2	multiple
5847	FISNACHT	60	3
5852	FISNACHT	24	3
5862	FISNACHT	60	3
5867	FISNACHT	60	3
5868	FISNACHT	60	3
5871	FISNACHT	1	3
5880	FISNACHT	1	3
5901	FISNACHT	52	3
5904	FISNACHT	14	3
5906	FISNACHT	1	3
5914	FISNACHT	4	3
5920	FISNACHT	1	3
5921	FISNACHT	60	4
5928	FISNACHT	60	4
5945	FISNACHT	60	4
5958	FISNACHT	60	1
5960	FISNACHT	60	1
5968	FISNACHT	60	1
5985	FISNACHT	6	2
6004	FISNACHT	23	2
6008	FISNACHT	60	2
6011	FISNACHT	13	2
6021	FISNACHT	1	2
6024	FISNACHT	1	2
6040	FISNACHT	60	2
6041	FISNACHT	1	2
6043	FISNACHT	5	2
6046	FISNACHT	60	2
6048	FISNACHT	60	2
6050	FISNACHT	15	2
6061	FISNACHT	1	3
6064	FISNACHT	1	3
6066	FISNACHT	60	3
6072	FISNACHT	60	3
6073	FISNACHT	13	3
6077	FISNACHT	60	3
6081	FISNACHT	1	3
6097	FISNACHT	60	multiple
6103	FISNACHT	60	3
6114	FISNACHT	1	3
6140	FISNACHT	60	4
6143	FISNACHT	60	4
6146	FISNACHT	1	4
6147	FISNACHT	60	4
6149	FISNACHT	60	4
6163	FISNACHT	60	1
6171	FISNACHT	1	1
6172	FISNACHT	23	1
6185	FISNACHT	60	1
6191	FISNACHT	1	2
6192	FISNACHT	1	2
6194	FISNACHT	60	2
6195	FISNACHT	0	2
6196	FISNACHT	60	2
6198	FISNACHT	60	2
6210	FISNACHT	60	2
6212	FISNACHT	60	2
6213	FISNACHT	23	2
6214	FISNACHT	60	2
6215	FISNACHT	60	3
6216	FISNACHT	60	3
6220	FISNACHT	60	3
6225	FISNACHT	60	3
6226	FISNACHT	26	3
6227	FISNACHT	60	3
6228	FISNACHT	60	3
6231	FISNACHT	1	3
6234	FISNACHT	60	3
6236	FISNACHT	29	3
6262	FISNACHT	60	4
6266	FISNACHT	60	1
6268	FISNACHT	48	1
6273	FISNACHT	60	1
6276n	FISNACHT	1	2
6280	FISNACHT	1	1
6282	FISNACHT	60	1
6284	FISNACHT	1	1
6286	FISNACHT	1	multiple
6287	FISNACHT	1	1
6290	FISNACHT	16	1
6296	FISNACHT	16	1
6300	FISNACHT	60	2
6303	FISNACHT	1	2
6307	FISNACHT	10	2
6308	FISNACHT	60	2
6310	FISNACHT	60	2
6311	FISNACHT	60	2
6313	FISNACHT	60	2
6316	FISNACHT	60	2
6317	FISNACHT	1	2
6318	FISNACHT	1	2
6319	FISNACHT	18	2
6321	FISNACHT	1	2
6322	FISNACHT	60	2
6324	FISNACHT	60	2
6325	FISNACHT	60	2
6328	FISNACHT	35	2
6329	FISNACHT	25	2
6331	FISNACHT	1	2
6331n	FISNACHT	60	3
6332	FISNACHT	1	2
6334	FISNACHT	60	2
6339	FISNACHT	42	2
6341	FISNACHT	60	2
6342	FISNACHT	58	multiple
6343	FISNACHT	2	2
6345	FISNACHT	60	2
6347	FISNACHT	1	2
6351	FISNACHT	60	3
6352	FISNACHT	60	3
6355	FISNACHT	60	3
6357	FISNACHT	24	3
6358	FISNACHT	1	3
6359	FISNACHT	1	3
6360	FISNACHT	59	3
6368	FISNACHT	60	3
6369	FISNACHT	60	3
6371	FISNACHT	40	3
6373	FISNACHT	4	3
6374	FISNACHT	40	3
6375	FISNACHT	60	3
6376	FISNACHT	1	3
6377	FISNACHT	1	3
6379	FISNACHT	60	3
6381	FISNACHT	60	3
6382	FISNACHT	1	3
6390	FISNACHT	1	3
6391	FISNACHT	60	3
6393	FISNACHT	8	3
6394	FISNACHT	12	3
6397	FISNACHT	1	3
6399	FISNACHT	60	3
6500	FISNACHT	60	2
6502	FISNACHT	12	3
6503	FISNACHT	60	3
6504	FISNACHT	60	3
6507	FISNACHT	60	3
6509	FISNACHT	60	3
6510	FISNACHT	5	3
6513	FISNACHT	1	3
6514	FISNACHT	1	3
6515	FISNACHT	1	3
6516	FISNACHT	19	3
6517	FISNACHT	1	3
6522	FISNACHT	60	3
6525	FISNACHT	60	3
6531	FISNACHT	60	3
6535	FISNACHT	60	3
6540	FISNACHT	1	3
6541	FISNACHT	60	3
6542	FISNACHT	60	3
6544	FISNACHT	60	3
6549	FISNACHT	24	3
6561	FISNACHT	60	4
6563	FISNACHT	1	4
6564	FISNACHT	60	4
6565	FISNACHT	32	4
6566	FISNACHT	60	4
6567	FISNACHT	60	4
6575	FISNACHT	8	1
6576	FISNACHT	43	1
6578	FISNACHT	60	multiple
6591	FISNACHT	8	multiple
6591n	FISNACHT	60	multiple
6598	FISNACHT	1	2
6599	FISNACHT	60	2
6600	FISNACHT	43	2
6602	FISNACHT	None	2
6604	FISNACHT	1	2
6605	FISNACHT	1	2
6609	FISNACHT	21	2
6611	FISNACHT	60	2
6612	FISNACHT	60	2
6617	FISNACHT	1	2
6619	FISNACHT	60	2
6642	FISNACHT	1	3
6643	FISNACHT	60	3
6647	FISNACHT	1	3
6648	FISNACHT	20	3
6656	FISNACHT	1	3
6658	FISNACHT	1	3
6662	FISNACHT	60	3
6663	FISNACHT	55	3
6666	FISNACHT	6	3
6667	FISNACHT	1	3
6667n	FISNACHT	60	multiple
6669	FISNACHT	1	3
6670	FISNACHT	60	3
6672	FISNACHT	60	3
6674	FISNACHT	44	3
6676	FISNACHT	1	3
6679	FISNACHT	1	3
6680	FISNACHT	60	3
6682	FISNACHT	60	4
6685	FISNACHT	60	4
6689	FISNACHT	60	4
6690	FISNACHT	60	4
6693	FISNACHT	60	4
6694	FISNACHT	35	1
6695	FISNACHT	56	1
6696	FISNACHT	60	1
6698	FISNACHT	15	1
6699	FISNACHT	60	1
6700	FISNACHT	60	1
6702	FISNACHT	60	1
6705	FISNACHT	41	1
6708	FISNACHT	1	1
6709	FISNACHT	44	1
6710	FISNACHT	60	1
6712	FISNACHT	60	1
6714	FISNACHT	60	1
6715	FISNACHT	60	1
6716	FISNACHT	42	1
6717	FISNACHT	1	1
6718	FISNACHT	4	multiple
6719	FISNACHT	60	1
6721	FISNACHT	60	2
6723	FISNACHT	29	2
6726	FISNACHT	60	2
6729	FISNACHT	1	2
6730	FISNACHT	1	2
6735	FISNACHT	1	2
6737	FISNACHT	55	2
6738	FISNACHT	60	2
6739	FISNACHT	1	2
6740	FISNACHT	60	2
6743	FISNACHT	24	2
6744	FISNACHT	59	2
6745	FISNACHT	1	2
6749	FISNACHT	60	2
6750	FISNACHT	33	2
6753	FISNACHT	1	2
6755	FISNACHT	60	multiple
6756	FISNACHT	60	2
6760	FISNACHT	13	multiple
6767	FISNACHT	60	multiple
6769	FISNACHT	60	3
6770	FISNACHT	60	3
6773	FISNACHT	1	3
6778	FISNACHT	60	3
6779	FISNACHT	60	3
6780	FISNACHT	60	3
6781	FISNACHT	60	3
6782	FISNACHT	2	3
6783	FISNACHT	1	multiple
6784	FISNACHT	34	3
6788	FISNACHT	1	3
6789	FISNACHT	36	3
6792	FISNACHT	44	3
6793	FISNACHT	38	3
6794	FISNACHT	12	3
6795	FISNACHT	12	3
6799	FISNACHT	14	3
6803	FISNACHT	60	3
6805	FISNACHT	None	3
6810	FISNACHT	3	4
6815	FISNACHT	60	4
6816	FISNACHT	60	4
6817	FISNACHT	60	4
6818	FISNACHT	60	4
6827	FISNACHT	60	1
6829	FISNACHT	60	1
6849	FISNACHT	60	1
6855	FISNACHT	60	2
6860	FISNACHT	49	2
6863	FISNACHT	37	2
6866	FISNACHT	22	2
6867	FISNACHT	48	2
6870	FISNACHT	60	2
6874	FISNACHT	60	2
6876	FISNACHT	1	2
6880	FISNACHT	60	2
6882	FISNACHT	45	2
6889	FISNACHT	57	2
6900	FISNACHT	1	3
6901	FISNACHT	1	3
6902	FISNACHT	60	3
6906	FISNACHT	60	3
6909	FISNACHT	1	3
6912n	FISNACHT	20	4
6920	FISNACHT	1	3
6921	FISNACHT	57	3
6935	FISNACHT	43	3
6942	FISNACHT	32	3
6944	FISNACHT	39	3
6951	FISNACHT	29	4
6962	FISNACHT	60	4
6974	FISNACHT	60	1
6978	FISNACHT	60	1
6981	FISNACHT	60	1
6992	FISNACHT	1	2
6993	FISNACHT	10	2
6997	FISNACHT	60	2
6999	FISNACHT	60	2
7103	FISNACHT	60	1
7107	FISNACHT	21	2
7108	FISNACHT	60	2
7111	FISNACHT	1	2
7116	FISNACHT	60	2
7117	FISNACHT	60	2
7122	FISNACHT	1	2
7124	FISNACHT	7	2
7132	FISNACHT	1	2
7134	FISNACHT	60	2
7138	FISNACHT	60	2
7139	FISNACHT	60	2
7146	FISNACHT	6	2
7149	FISNACHT	32	2
7156	FISNACHT	4	2
7161	FISNACHT	60	2
7170	FISNACHT	60	3
7174	FISNACHT	49	3
7194	FISNACHT	51	3
7199	FISNACHT	18	3
7202	FISNACHT	1	3
7204	FISNACHT	60	3
7208	FISNACHT	1	3
7209	FISNACHT	1	3
7217	FISNACHT	1	3
7222	FISNACHT	60	3
7225	FISNACHT	60	4
7241	FISNACHT	60	1
7242	FISNACHT	1	1
7243	FISNACHT	60	1
7245	FISNACHT	42	1
7246	FISNACHT	60	1
7247	FISNACHT	1	1
7248	FISNACHT	1	1
7250	FISNACHT	49	1
7251	FISNACHT	60	1
7256	FISNACHT	60	1
7257	FISNACHT	1	1
7258	FISNACHT	60	1
7259	FISNACHT	35	1
7260	FISNACHT	60	1
7261	FISNACHT	60	1
7262	FISNACHT	1	1
7268	FISNACHT	60	1
7269	FISNACHT	1	1
7273	FISNACHT	60	1
7279	FISNACHT	60	1
7280	FISNACHT	60	1
7281	FISNACHT	60	1
7282	FISNACHT	60	1
7283	FISNACHT	24	1
7288	FISNACHT	60	1
7289	FISNACHT	60	1
7291	FISNACHT	60	1
7292	FISNACHT	1	1
7297	FISNACHT	60	2
7298	FISNACHT	1	multiple
7299	FISNACHT	60	2
7305	FISNACHT	1	2
7307	FISNACHT	60	2
7308	FISNACHT	60	2
7311	FISNACHT	53	2
7312	FISNACHT	1	2
7314	FISNACHT	41	2
7315	FISNACHT	60	2
7316	FISNACHT	60	2
7322	FISNACHT	60	2
7326	FISNACHT	0	2
7329	FISNACHT	60	2
7330	FISNACHT	10	2
7331	FISNACHT	55	2
7332	FISNACHT	60	2
7333	FISNACHT	60	2
7337	FISNACHT	0	2
7338	FISNACHT	60	2
7339	FISNACHT	1	2
7340	FISNACHT	60	2
7342	FISNACHT	57	2
7344	FISNACHT	60	2
7347	FISNACHT	60	2
7348	FISNACHT	60	2
7349	FISNACHT	25	2
7351	FISNACHT	43	2
7354	FISNACHT	1	2
7359	FISNACHT	60	2
7362	FISNACHT	26	2
7363	FISNACHT	60	2
7365	FISNACHT	1	2
7367	FISNACHT	24	2
7373	FISNACHT	30	2
7374	FISNACHT	1	2
7375	FISNACHT	23	2
7376	FISNACHT	60	2
7377	FISNACHT	60	2
7382	FISNACHT	60	2
7384	FISNACHT	1	2
7385	FISNACHT	60	2
7388	FISNACHT	60	2
7391	FISNACHT	1	2
7394	FISNACHT	1	2
7395	FISNACHT	60	2
7397	FISNACHT	59	2
7398	FISNACHT	27	2
7399	FISNACHT	1	2
7411	FISNACHT	16	2
7415	FISNACHT	60	2
7418	FISNACHT	1	2
7420	FISNACHT	60	2
7421	FISNACHT	55	2
7423	FISNACHT	30	2
7433	FISNACHT	60	3
7434	FISNACHT	1	3
7436	FISNACHT	60	3
7438	FISNACHT	60	3
7440	FISNACHT	3	3
7442	FISNACHT	60	3
7446	FISNACHT	60	3
7448	FISNACHT	60	3
7452	FISNACHT	60	3
7455	FISNACHT	60	3
7457	FISNACHT	14	3
7458	FISNACHT	60	3
7463	FISNACHT	60	3
7464	FISNACHT	60	3
7467	FISNACHT	1	3
7470	FISNACHT	54	3
7472	FISNACHT	60	3
7474	FISNACHT	55	3
7477	FISNACHT	48	3
7479	FISNACHT	60	3
7486	FISNACHT	29	3
7487	FISNACHT	22	3
7488	FISNACHT	60	3
7491	FISNACHT	60	3
7497	FISNACHT	1	3
7505	FISNACHT	60	3
7506	FISNACHT	1	3
7508	FISNACHT	60	3
7511	FISNACHT	60	3
7515	FISNACHT	60	3
7518	FISNACHT	33	3
7520	FISNACHT	60	3
7522	FISNACHT	60	3
7526	FISNACHT	60	3
7531	FISNACHT	60	3
7534	FISNACHT	60	3
7536	FISNACHT	1	3
7539	FISNACHT	60	3
7551	FISNACHT	60	3
7553	FISNACHT	60	3
7554	FISNACHT	56	3
7556	FISNACHT	1	3
7569	FISNACHT	48	3
7570	FISNACHT	1	3
7576	FISNACHT	1	3
7580	FISNACHT	1	3
7581	FISNACHT	30	3
7583	FISNACHT	1	3
7584	FISNACHT	1	3
7585	FISNACHT	60	3
7588	FISNACHT	60	3
7589	FISNACHT	53	3
7594	FISNACHT	60	3
7601	FISNACHT	60	3
7613	FISNACHT	38	3
7619	FISNACHT	60	3
7624	FISNACHT	1	3
7625	FISNACHT	60	3
7629	FISNACHT	60	4
7630	FISNACHT	50	4
7633	FISNACHT	60	4
7634	FISNACHT	60	4
7638	FISNACHT	60	4
7639	FISNACHT	60	4
7640	FISNACHT	60	4
7642	FISNACHT	60	4
7644	FISNACHT	17	4
7645	FISNACHT	60	4
7649	FISNACHT	60	4
7665	FISNACHT	1	4
7670	FISNACHT	60	4
7688	FISNACHT	60	1
7689	FISNACHT	1	1
7698	FISNACHT	55	1
7708	FISNACHT	60	2
7709	FISNACHT	60	2
7716	FISNACHT	1	2
7718	FISNACHT	51	2
7722	FISNACHT	27	2
7731	FISNACHT	1	2
7732	FISNACHT	18	2
7738	FISNACHT	1	2
7739	FISNACHT	43	2
7741	FISNACHT	6	2
7742	FISNACHT	45	2
7746	FISNACHT	25	2
7748	FISNACHT	60	2
7749	FISNACHT	60	2
7752	FISNACHT	20	2
7757	FISNACHT	60	2
7771	FISNACHT	60	2
7772	FISNACHT	24	2
7774	FISNACHT	1	3
7776	FISNACHT	60	3
7781	FISNACHT	60	3
7785	FISNACHT	24	3
7790	FISNACHT	1	3
7795	FISNACHT	1	3
7804	FISNACHT	1	3
7806	FISNACHT	60	3
7808	FISNACHT	60	3
7818	FISNACHT	20	3
7824	FISNACHT	48	3
7826	FISNACHT	27	3
7834	FISNACHT	59	4
7838	FISNACHT	60	4
7847	FISNACHT	60	4
7851	FISNACHT	60	4
7867	FISNACHT	60	1
7873	FISNACHT	60	1
7875	FISNACHT	1	2
7883	FISNACHT	19	2
7890	FISNACHT	1	2
7897	FISNACHT	60	2
7903	FISNACHT	1	2
7906	FISNACHT	3	2
7908	FISNACHT	50	2
7911	FISNACHT	60	3
7913	FISNACHT	60	3
7919	FISNACHT	60	3
7926	FISNACHT	60	3
7938	FISNACHT	None	4
7940	FISNACHT	60	4
7941	FISNACHT	60	4
7942	FISNACHT	1	4
7959	FISNACHT	60	1
7994	FISNACHT	60	3
7996	FISNACHT	10	3
7997	FISNACHT	60	3
7999	FISNACHT	60	3
8001	FISNACHT	1	3
8002	FISNACHT	29	3
8007	FISNACHT	49	3
8012	FISNACHT	60	3
8020	FISNACHT	60	4
8021	FISNACHT	60	4
8023	FISNACHT	1	4
8026	FISNACHT	60	4
8036	FISNACHT	1	1
8038	FISNACHT	1	1
8053	FISNACHT	1	2
8057	FISNACHT	55	2
8069	FISNACHT	37	2
8070	FISNACHT	60	2
8073	FISNACHT	1	2
8075	FISNACHT	60	2
8076	FISNACHT	60	3
8079	FISNACHT	60	3
8081	FISNACHT	60	3
8089	FISNACHT	21	3
8094	FISNACHT	1	3
8095	FISNACHT	60	3
8303	FISNACHT	60	3
8313n	FISNACHT	60	3
8320	FISNACHT	60	4
8331	FISNACHT	60	1
8332	FISNACHT	1	1
8336	FISNACHT	41	1
8339	FISNACHT	60	1
8344	FISNACHT	32	1
8360	FISNACHT	60	1
8364	FISNACHT	1	2
8368	FISNACHT	7	2
8376	FISNACHT	1	2
8382	FISNACHT	60	2
8386	FISNACHT	60	2
8390	FISNACHT	60	2
8394	FISNACHT	10	2
8395	FISNACHT	60	2
8397	FISNACHT	60	2
8404	FISNACHT	1	2
8411	FISNACHT	3	2
8412	FISNACHT	8	2
8414	FISNACHT	60	2
8416	FISNACHT	1	2
8428	FISNACHT	60	3
8430	FISNACHT	48	3
8438	FISNACHT	7	3
8448	FISNACHT	1	3
8450	FISNACHT	1	3
8455	FISNACHT	60	3
8457	FISNACHT	20	3
8460	FISNACHT	60	3
8465	FISNACHT	1	3
8471	FISNACHT	60	3
8474	FISNACHT	18	3
8479	FISNACHT	2	4
8481	FISNACHT	60	4
8485	FISNACHT	50	4
8486	FISNACHT	60	4
8487	FISNACHT	60	4
8491	FISNACHT	48	4
8491n	FISNACHT	1	2
8493	FISNACHT	8	4
8512	FISNACHT	60	1
8513	FISNACHT	15	1
8518	FISNACHT	60	1
8527	FISNACHT	60	2
8536	FISNACHT	60	2
8538	FISNACHT	60	2
8565	FISNACHT	60	3
8567	FISNACHT	60	4
8575	FISNACHT	60	4
8576	FISNACHT	60	4
8591	FISNACHT	60	1
8593	FISNACHT	60	1
8603	FISNACHT	60	1
8622n	FISNACHT	60	4
8625	FISNACHT	60	2
8626	FISNACHT	9	2
8628	FISNACHT	60	2
8640	FISNACHT	4	2
8644	FISNACHT	1	2
8648	FISNACHT	60	2
8654	FISNACHT	60	2
8661	FISNACHT	1	2
8663	FISNACHT	1	2
8669	FISNACHT	1	3
8688n	FISNACHT	60	3
8696	FISNACHT	60	3
8719	FISNACHT	60	4
8721	FISNACHT	60	4
8744	FISNACHT	60	1
8746	FISNACHT	22	1
8753	FISNACHT	1	2
8754	FISNACHT	1	2
8760	FISNACHT	60	2
8763	FISNACHT	60	2
8771	FISNACHT	1	2
8791	FISNACHT	60	3
8792	FISNACHT	60	3
8901	FISNACHT	60	1
8922	FISNACHT	1	2
8939	FISNACHT	60	2
8942	FISNACHT	60	2
8945	FISNACHT	16	2
8948	FISNACHT	1	2
8965	FISNACHT	1	2
8974	FISNACHT	60	multiple
8979	FISNACHT	59	2
8999	FISNACHT	1	2
9010	FISNACHT	60	2
9016	FISNACHT	20	2
9023	FISNACHT	60	3
9044n	FISNACHT	60	2
9052	FISNACHT	1	3
9088	FISNACHT	60	3
9101	FISNACHT	42	3
9102	FISNACHT	60	3
9110	FISNACHT	60	3
9112	FISNACHT	60	3
9130	FISNACHT	1	3
9137	FISNACHT	1	4
9163	FISNACHT	60	4
9170	FISNACHT	60	4
9174	FISNACHT	27	1
9195	FISNACHT	54	1
9213	FISNACHT	8	1
9241	FISNACHT	38	2
9254n	FISNACHT	1	1
9255	FISNACHT	1	2
9259	FISNACHT	60	2
9267	FISNACHT	60	2
9269	FISNACHT	60	2
9271	FISNACHT	1	2
9279	FISNACHT	60	2
9293	FISNACHT	60	2
9304	FISNACHT	1	2
9310	FISNACHT	19	3
9316	FISNACHT	1	3
9342	FISNACHT	60	3
9343n	FISNACHT	8	2
9346	FISNACHT	60	3
9360n	FISNACHT	43	2
9368	FISNACHT	60	3
9374	FISNACHT	7	3
9376	FISNACHT	60	3
9379	FISNACHT	60	3
9380	FISNACHT	1	3
9394	FISNACHT	19	3
9395	FISNACHT	60	3
9399	FISNACHT	40	3
9423	FISNACHT	1	4
9427	FISNACHT	60	4
9429	FISNACHT	60	4
9440	FISNACHT	10	1
9447	FISNACHT	5	1
9462	FISNACHT	15	1
9465	FISNACHT	47	1
9473	FISNACHT	28	1
9475	FISNACHT	43	2
9476	FISNACHT	60	2
9487n	FISNACHT	37	3
9509	FISNACHT	1	2
9510	FISNACHT	1	2
9511	FISNACHT	18	2
9513n	FISNACHT	60	2
9524	FISNACHT	2	2
9526	FISNACHT	60	2
9529	FISNACHT	1	2
9530	FISNACHT	1	2
9535	FISNACHT	1	2
9547	FISNACHT	27	2
9562	FISNACHT	60	2
9566	FISNACHT	60	3
9571	FISNACHT	38	3
9587n	FISNACHT	60	2
9606	FISNACHT	60	3
9610	FISNACHT	60	3
9615	FISNACHT	60	3
9628	FISNACHT	60	3
9641	FISNACHT	60	3
9659	FISNACHT	3	3
9661	FISNACHT	1	3
9663	FISNACHT	1	3
9698	FISNACHT	45	4
9704	FISNACHT	17	1
9709	FISNACHT	1	1
9726	FISNACHT	28	1
9733	FISNACHT	0	1
9741	FISNACHT	60	multiple
9758	FISNACHT	60	2
9759	FISNACHT	14	2
9762	FISNACHT	60	2
9789n	FISNACHT	8	2
9793	FISNACHT	1	2
9800	FISNACHT	29	3
9818	FISNACHT	1	3
9830	FISNACHT	60	3
9867	FISNACHT	1	3
9899	FISNACHT	1	1
10304n	FISNACHT	60	2
10564n	FISNACHT	60	4
10724n	FISNACHT	1	1
10832n	FISNACHT	1	2
10885n	FISNACHT	7	2
10972n	FISNACHT	60	2
11049n	FISNACHT	1	2
11100n	FISNACHT	60	4
11292n	FISNACHT	60	multiple
11343n	FISNACHT	60	3
11928n	FISNACHT	60	3
12382n	FISNACHT	60	3
12488n	FISNACHT	60	2
12665n	FISNACHT	60	3
12888n	FISNACHT	1	4
13229n	FISNACHT	60	4
13583n	FISNACHT	8	multiple
13847n	FISNACHT	60	3
13935n	FISNACHT	60	3
14033n	FISNACHT	60	3
14232n	FISNACHT	1	2
14521n	FISNACHT	60	3
14594n	FISNACHT	1	3
14678n	FISNACHT	14	2
14782n	FISNACHT	60	2
14830n	FISNACHT	33	2
15294n	FISNACHT	2	3
15435n	FISNACHT	1	1
15445n	FISNACHT	53	2
15456n	FISNACHT	60	2
15796n	FISNACHT	9	1
16163n	FISNACHT	60	3
16200n	FISNACHT	1	1
16261n	FISNACHT	60	3
16304n	FISNACHT	1	3
16352n	FISNACHT	1	2
16494n	FISNACHT	60	3
16521n	FISNACHT	60	3
16568n	FISNACHT	60	2
16657n	FISNACHT	1	2
16704n	FISNACHT	1	4
16803n	FISNACHT	14	3
17071n	FISNACHT	1	4
17091n	FISNACHT	24	2
17119n	FISNACHT	32	2
17204n	FISNACHT	60	3
17261n	FISNACHT	60	4
17318n	FISNACHT	57	2
17431n	FISNACHT	1	2
17652n	FISNACHT	60	3
17716n	FISNACHT	60	1
17903n	FISNACHT	60	1
18015n	FISNACHT	41	2
18116n	FISNACHT	19	2
18368n	FISNACHT	1	2
18381n	FISNACHT	60	3
18614n	FISNACHT	1	3
18676n	FISNACHT	1	4
18718n	FISNACHT	6	3
19070n	FISNACHT	60	3
19158n	FISNACHT	60	1
19392n	FISNACHT	60	4
19499n	FISNACHT	60	3
19600n	FISNACHT	30	2
20106n	FISNACHT	60	1
20333n	FISNACHT	60	3
20405n	FISNACHT	51	2
20433n	FISNACHT	60	2
20922n	FISNACHT	60	3
21045n	FISNACHT	60	3
21278n	FISNACHT	None	1
21365n	FISNACHT	3	3
21656n	FISNACHT	60	3
21910n	FISNACHT	55	3
22177n	FISNACHT	4	4
22212n	FISNACHT	60	3
22565n	FISNACHT	None	4
22800n	FISNACHT	60	2
22814n	FISNACHT	39	3
23044n	FISNACHT	1	2
23097n	FISNACHT	60	1
23166n	FISNACHT	1	3
23194n	FISNACHT	1	3
23270n	FISNACHT	60	2
23332n	FISNACHT	1	3
23583n	FISNACHT	1	3
24371n	FISNACHT	1	1
24588n	FISNACHT	60	1
24818n	FISNACHT	51	3
24883n	FISNACHT	60	2
24922n	FISNACHT	60	2
25009n	FISNACHT	59	2
25120n	FISNACHT	13	4
25253nn	FISNACHT	0	3
25340n	FISNACHT	1	2
25517n	FISNACHT	60	3
25831n	FISNACHT	60	3
25881n	FISNACHT	60	2
25940n	FISNACHT	0	3
25957n	FISNACHT	60	4
26319n	FISNACHT	60	2
27008n	FISNACHT	44	4
27052n	FISNACHT	60	3
27053n	FISNACHT	60	3
27097n	FISNACHT	None	2
27398n	FISNACHT	27	2
27558n	FISNACHT	60	3
27880n	FISNACHT	1	1
28418n	FISNACHT	1	2
28838n	FISNACHT	1	2
28864n	FISNACHT	1	1
28973n	FISNACHT	1	2
29195n	FISNACHT	60	2
29278n	FISNACHT	11	3
29341n	FISNACHT	39	3
29354n	FISNACHT	60	2
29366n	FISNACHT	1	4
29533n	FISNACHT	60	1
29552n	FISNACHT	60	4
30010n	FISNACHT	60	1
30265n	FISNACHT	1	1
30267n	FISNACHT	13	2
30340n	FISNACHT	60	3
30424n	FISNACHT	53	2
30459n	FISNACHT	60	2
30760n	FISNACHT	1	1
30845n	FISNACHT	7	3
31045n	FISNACHT	60	3
31105n	FISNACHT	29	2
31171n	FISNACHT	60	2
31189n	FISNACHT	60	2
31229n	FISNACHT	60	2
31305n	FISNACHT	7	3
31337n	FISNACHT	6	2
31600n	FISNACHT	1	2
31611n	FISNACHT	7	2
31637n	FISNACHT	1	1
31694n	FISNACHT	1	4
31870n	FISNACHT	60	multiple
31954n	FISNACHT	60	2
31966n	FISNACHT	60	1
32090n	FISNACHT	60	3
32109n	FISNACHT	0	2
32154nn	FISNACHT	37	1
32187nn	FISNACHT	60	4
32425n	FISNACHT	60	2
32700n	FISNACHT	1	2
32817n	FISNACHT	16	4
32974n	FISNACHT	1	2
33121n	FISNACHT	60	4
33292n	FISNACHT	48	4
33392n	FISNACHT	22	2
33566n	FISNACHT	60	4
34099n	FISNACHT	60	3
34245n	FISNACHT	51	4
34378n	FISNACHT	60	2
34475n	FISNACHT	2	3
34649nn	FISNACHT	36	2
34811n	FISNACHT	60	2
35237n	FISNACHT	60	multiple
35628n	FISNACHT	60	2
36156n	FISNACHT	60	4
36404n	FISNACHT	60	3
37405n	FISNACHT	60	2
37510n	FISNACHT	60	3
37623n	FISNACHT	60	3
38070n	FISNACHT	60	1
39169n	FISNACHT	1	2
41420n	FISNACHT	1	3
41995n	FISNACHT	1	multiple
42451n	FISNACHT	1	3
48037nn	FISNACHT	1	2
50329n	FISNACHT	60	2
51788n	FISNACHT	60	3
52104n	FISNACHT	60	3
53250nn	FISNACHT	60	2
56330n	FISNACHT	1	1
62513nn	FISNACHT	56	3
65166n	FISNACHT	60	3
40	NLR-B30.2	60	Unknown
48	NLR-B30.2	60	Unknown
63	NLR-B30.2	11	Unknown
84	NLR-B30.2	47	Unknown
88	NLR-B30.2	60	Unknown
89	NLR-B30.2	60	Unknown
95	NLR-B30.2	60	Unknown
416	NLR-B30.2	60	Unknown
419	NLR-B30.2	49	Unknown
436n	NLR-B30.2	0	Unknown
447	NLR-B30.2	None	Unknown
458n	NLR-B30.2	17	Unknown
475n	NLR-B30.2	60	Unknown
490n	NLR-B30.2	1	Unknown
491	NLR-B30.2	60	Unknown
630	NLR-B30.2	60	Unknown
696	NLR-B30.2	60	Unknown
800	NLR-B30.2	60	Unknown
802n	NLR-B30.2	55	Unknown
819	NLR-B30.2	60	Unknown
867	NLR-B30.2	60	Unknown
881	NLR-B30.2	60	Unknown
882	NLR-B30.2	60	Unknown
886n	NLR-B30.2	60	Unknown
891	NLR-B30.2	60	Unknown
898	NLR-B30.2	52	Unknown
940n	NLR-B30.2	60	Unknown
958	NLR-B30.2	60	Unknown
962n	NLR-B30.2	19	Unknown
981	NLR-B30.2	60	Unknown
1028n	NLR-B30.2	60	Unknown
1146n	NLR-B30.2	1	Unknown
1200n	NLR-B30.2	1	Unknown
1397n	NLR-B30.2	60	Unknown
1412n	NLR-B30.2	4	Unknown
1420n	NLR-B30.2	60	Unknown
1432n	NLR-B30.2	60	Unknown
1583n	NLR-B30.2	60	Unknown
1613n	NLR-B30.2	1	Unknown
1669n	NLR-B30.2	60	Unknown
1699n	NLR-B30.2	0	Unknown
1709n	NLR-B30.2	1	Unknown
1789n	NLR-B30.2	41	Unknown
1808nn	NLR-B30.2	46	Unknown
2039n	NLR-B30.2	36	Unknown
2050n	NLR-B30.2	60	Unknown
2135n	NLR-B30.2	1	Unknown
2336n	NLR-B30.2	60	Unknown
2359n	NLR-B30.2	60	Unknown
2370n	NLR-B30.2	60	Unknown
2572n	NLR-B30.2	60	Unknown
2781n	NLR-B30.2	1	Unknown
2800n	NLR-B30.2	7	Unknown
3011n	NLR-B30.2	60	Unknown
3032n	NLR-B30.2	33	Unknown
3128n	NLR-B30.2	2	Unknown
3172n	NLR-B30.2	60	Unknown
3234nn	NLR-B30.2	1	Unknown
3345n	NLR-B30.2	55	Unknown
3402n	NLR-B30.2	58	Unknown
3572n	NLR-B30.2	17	Unknown
3688n	NLR-B30.2	3	Unknown
3706n	NLR-B30.2	6	Unknown
3947n	NLR-B30.2	60	Unknown
4004	NLR-B30.2	1	Unknown
4006	NLR-B30.2	7	Unknown
4024n	NLR-B30.2	1	Unknown
4038n	NLR-B30.2	1	Unknown
4040	NLR-B30.2	14	Unknown
4042	NLR-B30.2	1	Unknown
4043	NLR-B30.2	23	Unknown
4165	NLR-B30.2	25	Unknown
4177	NLR-B30.2	13	Unknown
4185	NLR-B30.2	60	Unknown
4197	NLR-B30.2	60	Unknown
4199	NLR-B30.2	60	Unknown
4211	NLR-B30.2	20	Unknown
4215	NLR-B30.2	1	Unknown
4241nn	NLR-B30.2	0	Unknown
4294	NLR-B30.2	60	Unknown
4412	NLR-B30.2	60	Unknown
4438nn	NLR-B30.2	60	Unknown
4441	NLR-B30.2	1	Unknown
4463	NLR-B30.2	60	Unknown
4468	NLR-B30.2	58	Unknown
4476	NLR-B30.2	60	Unknown
4497	NLR-B30.2	1	Unknown
4803	NLR-B30.2	1	Unknown
4813	NLR-B30.2	49	Unknown
4823	NLR-B30.2	60	Unknown
4851	NLR-B30.2	1	Unknown
4867	NLR-B30.2	60	Unknown
4870	NLR-B30.2	60	Unknown
4885n	NLR-B30.2	8	Unknown
4895	NLR-B30.2	60	Unknown
5903nn	NLR-B30.2	60	Unknown
5957n	NLR-B30.2	40	Unknown
6009	NLR-B30.2	60	Unknown
6011	NLR-B30.2	45	Unknown
6013	NLR-B30.2	60	Unknown
6024	NLR-B30.2	60	Unknown
6027	NLR-B30.2	41	Unknown
6053	NLR-B30.2	1	Unknown
6073	NLR-B30.2	60	Unknown
6327	NLR-B30.2	60	Unknown
6333	NLR-B30.2	24	Unknown
6368	NLR-B30.2	1	Unknown
6377	NLR-B30.2	57	Unknown
6383	NLR-B30.2	1	Unknown
6396	NLR-B30.2	60	Unknown
6397	NLR-B30.2	49	Unknown
6532	NLR-B30.2	60	Unknown
6557	NLR-B30.2	19	Unknown
6591	NLR-B30.2	43	Unknown
6599	NLR-B30.2	60	Unknown
6728	NLR-B30.2	60	Unknown
6760	NLR-B30.2	60	Unknown
6836nn	NLR-B30.2	60	Unknown
6923	NLR-B30.2	60	Unknown
6932	NLR-B30.2	1	Unknown
6934	NLR-B30.2	1	Unknown
6950	NLR-B30.2	60	Unknown
6963	NLR-B30.2	55	Unknown
6965	NLR-B30.2	30	Unknown
6968	NLR-B30.2	8	Unknown
6987	NLR-B30.2	1	Unknown
6999	NLR-B30.2	55	Unknown
7454n	NLR-B30.2	60	Unknown
7932nn	NLR-B30.2	60	Unknown
8003	NLR-B30.2	60	Unknown
8023	NLR-B30.2	8	Unknown
8057	NLR-B30.2	60	Unknown
8065	NLR-B30.2	8	Unknown
8074	NLR-B30.2	32	Unknown
8149	NLR-B30.2	60	Unknown
8155	NLR-B30.2	60	Unknown
8171	NLR-B30.2	1	Unknown
8175n	NLR-B30.2	9	Unknown
8206	NLR-B30.2	60	Unknown
8214	NLR-B30.2	36	Unknown
8230	NLR-B30.2	34	Unknown
8292	NLR-B30.2	60	Unknown
8415	NLR-B30.2	24	Unknown
8420	NLR-B30.2	59	Unknown
8490n	NLR-B30.2	60	Unknown
8626	NLR-B30.2	1	Unknown
8667	NLR-B30.2	1	Unknown
8676	NLR-B30.2	15	Unknown
8683	NLR-B30.2	1	Unknown
8800	NLR-B30.2	60	Unknown
8804	NLR-B30.2	25	Unknown
8830	NLR-B30.2	60	Unknown
8919	NLR-B30.2	1	Unknown
9440n	NLR-B30.2	1	Unknown
9502	NLR-B30.2	60	Unknown
9504	NLR-B30.2	60	Unknown
9565	NLR-B30.2	1	Unknown
9581	NLR-B30.2	3	Unknown
9632n	NLR-B30.2	60	Unknown
9829	NLR-B30.2	60	Unknown
9830	NLR-B30.2	60	Unknown
9833	NLR-B30.2	60	Unknown
9841n	NLR-B30.2	12	Unknown
9868	NLR-B30.2	1	Unknown
9870	NLR-B30.2	1	Unknown
10259n	NLR-B30.2	60	Unknown
10442n	NLR-B30.2	7	Unknown
10501n	NLR-B30.2	30	Unknown
10516n	NLR-B30.2	1	Unknown
10530n	NLR-B30.2	1	Unknown
10632n	NLR-B30.2	60	Unknown
10633n	NLR-B30.2	1	Unknown
10748n	NLR-B30.2	60	Unknown
10878n	NLR-B30.2	60	Unknown
11309n	NLR-B30.2	9	Unknown
11419n	NLR-B30.2	56	Unknown
11425n	NLR-B30.2	60	Unknown
11535n	NLR-B30.2	60	Unknown
11607n	NLR-B30.2	60	Unknown
11935n	NLR-B30.2	1	Unknown
12762n	NLR-B30.2	60	Unknown
12784n	NLR-B30.2	53	Unknown
13224n	NLR-B30.2	60	Unknown
13292n	NLR-B30.2	1	Unknown
13409n	NLR-B30.2	60	Unknown
13489n	NLR-B30.2	1	Unknown
13674n	NLR-B30.2	20	Unknown
13961n	NLR-B30.2	60	Unknown
14002n	NLR-B30.2	1	Unknown
14061n	NLR-B30.2	60	Unknown
14075n	NLR-B30.2	1	Unknown
14270n	NLR-B30.2	1	Unknown
14427n	NLR-B30.2	1	Unknown
14635n	NLR-B30.2	1	Unknown
14745n	NLR-B30.2	60	Unknown
14750n	NLR-B30.2	1	Unknown
15055n	NLR-B30.2	60	Unknown
15263n	NLR-B30.2	1	Unknown
15338n	NLR-B30.2	60	Unknown
15477n	NLR-B30.2	60	Unknown
15634n	NLR-B30.2	60	Unknown
15889n	NLR-B30.2	38	Unknown
16654n	NLR-B30.2	60	Unknown
16993n	NLR-B30.2	60	Unknown
17168n	NLR-B30.2	60	Unknown
18042n	NLR-B30.2	60	Unknown
18465n	NLR-B30.2	1	Unknown
18591n	NLR-B30.2	60	Unknown
18687n	NLR-B30.2	60	Unknown
18836n	NLR-B30.2	16	Unknown
19108n	NLR-B30.2	1	Unknown
19223n	NLR-B30.2	50	Unknown
19915n	NLR-B30.2	60	Unknown
19977n	NLR-B30.2	60	Unknown
20246n	NLR-B30.2	60	Unknown
20583n	NLR-B30.2	60	Unknown
21025n	NLR-B30.2	60	Unknown
21239n	NLR-B30.2	5	Unknown
21461n	NLR-B30.2	60	Unknown
21480n	NLR-B30.2	60	Unknown
21557n	NLR-B30.2	32	Unknown
21687n	NLR-B30.2	60	Unknown
21714n	NLR-B30.2	9	Unknown
22015n	NLR-B30.2	41	Unknown
22055n	NLR-B30.2	60	Unknown
22221n	NLR-B30.2	60	Unknown
22555nn	NLR-B30.2	1	Unknown
22923n	NLR-B30.2	1	Unknown
23139n	NLR-B30.2	60	Unknown
23144n	NLR-B30.2	1	Unknown
23159n	NLR-B30.2	1	Unknown
23215n	NLR-B30.2	60	Unknown
23297n	NLR-B30.2	60	Unknown
23327n	NLR-B30.2	1	Unknown
23333n	NLR-B30.2	55	Unknown
23409n	NLR-B30.2	19	Unknown
23448n	NLR-B30.2	60	Unknown
23903n	NLR-B30.2	15	Unknown
23945n	NLR-B30.2	60	Unknown
23947n	NLR-B30.2	1	Unknown
23989n	NLR-B30.2	1	Unknown
23999n	NLR-B30.2	1	Unknown
24330n	NLR-B30.2	57	Unknown
24617n	NLR-B30.2	29	Unknown
24636n	NLR-B30.2	1	Unknown
24657n	NLR-B30.2	1	Unknown
24733n	NLR-B30.2	60	Unknown
24842n	NLR-B30.2	60	Unknown
24913n	NLR-B30.2	60	Unknown
25098n	NLR-B30.2	60	Unknown
25194n	NLR-B30.2	1	Unknown
25283n	NLR-B30.2	1	Unknown
25306n	NLR-B30.2	23	Unknown
25353n	NLR-B30.2	60	Unknown
25394n	NLR-B30.2	60	Unknown
25463n	NLR-B30.2	60	Unknown
25466n	NLR-B30.2	1	Unknown
25707n	NLR-B30.2	59	Unknown
25806n	NLR-B30.2	1	Unknown
25896n	NLR-B30.2	59	Unknown
25959n	NLR-B30.2	39	Unknown
25966n	NLR-B30.2	60	Unknown
26081n	NLR-B30.2	60	Unknown
26085n	NLR-B30.2	1	Unknown
26162n	NLR-B30.2	1	Unknown
26249n	NLR-B30.2	1	Unknown
26511n	NLR-B30.2	60	Unknown
26787n	NLR-B30.2	48	Unknown
26809n	NLR-B30.2	1	Unknown
26912n	NLR-B30.2	1	Unknown
26917n	NLR-B30.2	1	Unknown
26955n	NLR-B30.2	1	Unknown
27009n	NLR-B30.2	60	Unknown
27105n	NLR-B30.2	60	Unknown
27139n	NLR-B30.2	1	Unknown
27641n	NLR-B30.2	60	Unknown
27646n	NLR-B30.2	60	Unknown
28103n	NLR-B30.2	60	Unknown
28143n	NLR-B30.2	60	Unknown
28164n	NLR-B30.2	60	Unknown
28257n	NLR-B30.2	50	Unknown
28310n	NLR-B30.2	8	Unknown
28475n	NLR-B30.2	11	Unknown
28643n	NLR-B30.2	1	Unknown
28881n	NLR-B30.2	1	Unknown
29335n	NLR-B30.2	14	Unknown
29401n	NLR-B30.2	1	Unknown
29493n	NLR-B30.2	60	Unknown
29500n	NLR-B30.2	13	Unknown
29543n	NLR-B30.2	1	Unknown
29733n	NLR-B30.2	16	Unknown
30016n	NLR-B30.2	1	Unknown
30105n	NLR-B30.2	60	Unknown
30113n	NLR-B30.2	1	Unknown
30224n	NLR-B30.2	43	Unknown
30225n	NLR-B30.2	60	Unknown
30397n	NLR-B30.2	60	Unknown
30443n	NLR-B30.2	60	Unknown
30587n	NLR-B30.2	1	Unknown
30676n	NLR-B30.2	60	Unknown
31099n	NLR-B30.2	60	Unknown
31204n	NLR-B30.2	1	Unknown
31319n	NLR-B30.2	60	Unknown
31322n	NLR-B30.2	51	Unknown
31386n	NLR-B30.2	60	Unknown
31480n	NLR-B30.2	1	Unknown
31591n	NLR-B30.2	45	Unknown
31629n	NLR-B30.2	0	Unknown
31676n	NLR-B30.2	12	Unknown
31701n	NLR-B30.2	43	Unknown
31848n	NLR-B30.2	10	Unknown
31971n	NLR-B30.2	1	Unknown
32002n	NLR-B30.2	20	Unknown
32017n	NLR-B30.2	60	Unknown
32177n	NLR-B30.2	16	Unknown
32272n	NLR-B30.2	1	Unknown
32301n	NLR-B30.2	60	Unknown
32373n	NLR-B30.2	60	Unknown
32381n	NLR-B30.2	34	Unknown
32446n	NLR-B30.2	60	Unknown
32462n	NLR-B30.2	1	Unknown
32535n	NLR-B30.2	None	Unknown
32560n	NLR-B30.2	60	Unknown
32586n	NLR-B30.2	39	Unknown
32728n	NLR-B30.2	1	Unknown
33097n	NLR-B30.2	1	Unknown
33183n	NLR-B30.2	49	Unknown
33280n	NLR-B30.2	39	Unknown
33461n	NLR-B30.2	43	Unknown
33594n	NLR-B30.2	None	Unknown
33598n	NLR-B30.2	None	Unknown
33887n	NLR-B30.2	60	Unknown
33917n	NLR-B30.2	1	Unknown
34013n	NLR-B30.2	60	Unknown
34032n	NLR-B30.2	1	Unknown
34078n	NLR-B30.2	60	Unknown
34174n	NLR-B30.2	60	Unknown
34231n	NLR-B30.2	60	Unknown
34384n	NLR-B30.2	60	Unknown
34406n	NLR-B30.2	60	Unknown
34409n	NLR-B30.2	1	Unknown
34427n	NLR-B30.2	6	Unknown
34541n	NLR-B30.2	60	Unknown
34728n	NLR-B30.2	60	Unknown
34733n	NLR-B30.2	60	Unknown
34734n	NLR-B30.2	60	Unknown
34786n	NLR-B30.2	0	Unknown
34817n	NLR-B30.2	60	Unknown
34863n	NLR-B30.2	60	Unknown
34880n	NLR-B30.2	60	Unknown
34960n	NLR-B30.2	18	Unknown
35096n	NLR-B30.2	1	Unknown
35235n	NLR-B30.2	1	Unknown
35348n	NLR-B30.2	60	Unknown
35396n	NLR-B30.2	1	Unknown
35429n	NLR-B30.2	60	Unknown
35437n	NLR-B30.2	1	Unknown
35550n	NLR-B30.2	60	Unknown
35627n	NLR-B30.2	33	Unknown
35668n	NLR-B30.2	60	Unknown
35697n	NLR-B30.2	60	Unknown
35900n	NLR-B30.2	28	Unknown
35997n	NLR-B30.2	None	Unknown
36116n	NLR-B30.2	1	Unknown
36129n	NLR-B30.2	56	Unknown
36184n	NLR-B30.2	1	Unknown
36218n	NLR-B30.2	60	Unknown
36241n	NLR-B30.2	60	Unknown
36491n	NLR-B30.2	60	Unknown
36509nn	NLR-B30.2	1	Unknown
36737n	NLR-B30.2	1	Unknown
36789n	NLR-B30.2	None	Unknown
37175n	NLR-B30.2	None	Unknown
37203n	NLR-B30.2	44	Unknown
37323n	NLR-B30.2	60	Unknown
37383n	NLR-B30.2	31	Unknown
37489n	NLR-B30.2	60	Unknown
37557n	NLR-B30.2	60	Unknown
37669n	NLR-B30.2	48	Unknown
37724n	NLR-B30.2	60	Unknown
37974n	NLR-B30.2	60	Unknown
38023n	NLR-B30.2	None	Unknown
38245n	NLR-B30.2	60	Unknown
38447n	NLR-B30.2	60	Unknown
38525n	NLR-B30.2	60	Unknown
38535n	NLR-B30.2	11	Unknown
38669n	NLR-B30.2	60	Unknown
38705n	NLR-B30.2	22	Unknown
38832n	NLR-B30.2	1	Unknown
38953n	NLR-B30.2	19	Unknown
39041n	NLR-B30.2	53	Unknown
39052n	NLR-B30.2	60	Unknown
39206n	NLR-B30.2	17	Unknown
39216n	NLR-B30.2	60	Unknown
39440n	NLR-B30.2	1	Unknown
39447n	NLR-B30.2	1	Unknown
39545n	NLR-B30.2	48	Unknown
40118n	NLR-B30.2	1	Unknown
40179n	NLR-B30.2	50	Unknown
40244n	NLR-B30.2	60	Unknown
40295n	NLR-B30.2	60	Unknown
40340n	NLR-B30.2	60	Unknown
40520n	NLR-B30.2	0	Unknown
40919n	NLR-B30.2	25	Unknown
40943n	NLR-B30.2	0	Unknown
40957n	NLR-B30.2	1	Unknown
41030n	NLR-B30.2	60	Unknown
41098n	NLR-B30.2	60	Unknown
41318n	NLR-B30.2	60	Unknown
41455n	NLR-B30.2	60	Unknown
41481n	NLR-B30.2	1	Unknown
41534n	NLR-B30.2	3	Unknown
41549n	NLR-B30.2	60	Unknown
41695n	NLR-B30.2	60	Unknown
41707n	NLR-B30.2	21	Unknown
41747n	NLR-B30.2	60	Unknown
41806n	NLR-B30.2	60	Unknown
42060n	NLR-B30.2	0	Unknown
42093n	NLR-B30.2	23	Unknown
42514n	NLR-B30.2	60	Unknown
42587n	NLR-B30.2	60	Unknown
42594n	NLR-B30.2	60	Unknown
42681n	NLR-B30.2	60	Unknown
42868n	NLR-B30.2	1	Unknown
42909n	NLR-B30.2	59	Unknown
42949n	NLR-B30.2	1	Unknown
42969n	NLR-B30.2	60	Unknown
42982n	NLR-B30.2	52	Unknown
43176n	NLR-B30.2	1	Unknown
43208n	NLR-B30.2	6	Unknown
43293n	NLR-B30.2	60	Unknown
43364n	NLR-B30.2	1	Unknown
43409n	NLR-B30.2	53	Unknown
43422n	NLR-B30.2	1	Unknown
43848n	NLR-B30.2	0	Unknown
43968n	NLR-B30.2	None	Unknown
43998n	NLR-B30.2	60	Unknown
44064n	NLR-B30.2	None	Unknown
44955n	NLR-B30.2	1	Unknown
[truncated: 135 more rows]

## Sheet: fig2S3_B30.2_subtype_counts
Population	Fish	Class	Contig_Count
TU	TU01	NLR	82
TU	TU01	Other	89
TU	TU02	NLR	73
TU	TU02	Other	75
TU	TU03	NLR	103
TU	TU03	Other	98
TU	TU06	NLR	127
TU	TU06	Other	141
TU	TU08	NLR	5
TU	TU08	Other	8
TU	TU10	NLR	12
TU	TU10	Other	10
TU	TU12	NLR	1
TU	TU12	Other	2
TU	TU14	NLR	10
TU	TU14	Other	10
CGN	CGN1	NLR	179
CGN	CGN1	Other	127
CGN	CGN2	NLR	96
CGN	CGN2	Other	84
CGN	CGN3	NLR	68
CGN	CGN3	Other	49
CGN	CGN4	NLR	143
CGN	CGN4	Other	113
CGN	CGN5	NLR	194
CGN	CGN5	Other	184
CGN	CGN6	NLR	204
CGN	CGN6	Other	173
CGN	CGN7	NLR	178
CGN	CGN7	Other	150
CGN	CGN8	NLR	226
CGN	CGN8	Other	166
DP	DP03	NLR	0
DP	DP03	Other	0
DP	DP05	NLR	13
DP	DP05	Other	24
DP	DP07	NLR	51
DP	DP07	Other	30
DP	DP09	NLR	52
DP	DP09	Other	45
DP	DP10	NLR	29
DP	DP10	Other	20
DP	DP12	NLR	32
DP	DP12	Other	23
DP	DP13	NLR	27
DP	DP13	Other	19
DP	DP15	NLR	49
DP	DP15	Other	22
DP	DP16	NLR	32
DP	DP16	Other	21
DP	DP20	NLR	523
DP	DP20	Other	408
DP	DP21	NLR	40
DP	DP21	Other	38
DP	DP23	NLR	36
DP	DP23	Other	24
DP	DP24	NLR	15
DP	DP24	Other	16
DP	DP25	NLR	28
DP	DP25	Other	22
DP	DP28	NLR	93
DP	DP28	Other	112
DP	DP29	NLR	23
DP	DP29	Other	19
DP	DP31	NLR	22
DP	DP31	Other	20
DP	DP32	NLR	42
DP	DP32	Other	35
DP	DP33	NLR	18
DP	DP33	Other	14
DP	DP34	NLR	3
DP	DP34	Other	5
KG	KG03	NLR	290
KG	KG03	Other	189
KG	KG05	NLR	323
KG	KG05	Other	215
KG	KG07	NLR	394
KG	KG07	Other	227
KG	KG12	NLR	294
KG	KG12	Other	155
KG	KG14	NLR	255
KG	KG14	Other	188
KG	KG15	NLR	267
KG	KG15	Other	143
KG	KG18	NLR	357
KG	KG18	Other	228
KG	KG19	NLR	217
KG	KG19	Other	152
KG	KG20	NLR	242
KG	KG20	Other	223
KG	KG22	NLR	328
KG	KG22	Other	252
KG	KG24	NLR	331
KG	KG24	Other	252
KG	KG26	NLR	277
KG	KG26	Other	173
KG	KG29	NLR	293
KG	KG29	Other	218
KG	KG32	NLR	233
KG	KG32	Other	152
KG	KG33	NLR	356
KG	KG33	Other	254
KG	KG35	NLR	67
KG	KG35	Other	57
KG	KG41	NLR	20
KG	KG41	Other	17
KG	KG42	NLR	12
KG	KG42	Other	9
KG	KG43	NLR	47
KG	KG43	Other	44
KG	KG44	NLR	178
KG	KG44	Other	167
SN	SN03	NLR	304
SN	SN03	Other	332
SN	SN04	NLR	175
SN	SN04	Other	209
SN	SN08	NLR	142
SN	SN08	Other	109
SN	SN09	NLR	167
SN	SN09	Other	184
SN	SN10	NLR	306
SN	SN10	Other	303
SN	SN11	NLR	155
SN	SN11	Other	142
SN	SN12	NLR	80
SN	SN12	Other	63
SN	SN13	NLR	133
SN	SN13	Other	104
SN	SN14	NLR	214
SN	SN14	Other	210
SN	SN15	NLR	254
SN	SN15	Other	233
SN	SN16	NLR	145
SN	SN16	Other	228
SN	SN17	NLR	178
SN	SN17	Other	146
SN	SN18	NLR	184
SN	SN18	Other	233
SN	SN19	NLR	246
SN	SN19	Other	231
SN	SN20	NLR	301
SN	SN20	Other	268
SN	SN21	NLR	187
SN	SN21	Other	191
SN	SN23	NLR	335
SN	SN23	Other	280
SN	SN24	NLR	279
SN	SN24	Other	377
SN	SN26	NLR	222
SN	SN26	Other	189
CHT	CHT01	NLR	264
CHT	CHT01	Other	307
CHT	CHT02	NLR	367
CHT	CHT02	Other	444
CHT	CHT03	NLR	300
CHT	CHT03	Other	338
CHT	CHT04	NLR	311
CHT	CHT04	Other	324
CHT	CHT05	NLR	278
CHT	CHT05	Other	315
CHT	CHT06	NLR	274
CHT	CHT06	Other	375
CHT	CHT07	NLR	231
CHT	CHT07	Other	295
CHT	CHT08	NLR	224
CHT	CHT08	Other	265
CHT	CHT10	NLR	250
CHT	CHT10	Other	319
CHT	CHT11	NLR	267
CHT	CHT11	Other	317
CHT	CHT12	NLR	211
CHT	CHT12	Other	289
CHT	CHT14	NLR	9
CHT	CHT14	Other	17
CHT	CHT15	NLR	187
CHT	CHT15	Other	205
CHT	CHT16	NLR	282
CHT	CHT16	Other	324
CHT	CHT19	NLR	65
CHT	CHT19	Other	105
CHT	CHT23	NLR	145
CHT	CHT23	Other	176
CHT	CHT26	NLR	270
CHT	CHT26	Other	239
CHT	CHT28	NLR	184
CHT	CHT28	Other	229

## Sheet: fig2S3_B30.2_47bp.fasta_forLogo
>ENSDARG00000077697|4
tctggatcatggaggacacacgaggattacagcaggaccacgcaaat
>ENSDARG00000088082|4
tctggatcatggaggaaagaagaggattacagcaggactgcacaaat
>ENSDARG00000089582|4
tctggatcatggaggagagaagtggtttacagcgggactgcacaaat
>ENSDARG00000089582|4
tctggatcatggaggagagaagtggtttacagcgggactgcacaaat
>ENSDARG00000090160|4
tctggatcatggaggacacacgaggattacagcaggaccacgcaaat
>ENSDARG00000092759|4
tgtggatcatggaggagagaagatgattacagcaggactgcacaaat
>ENSDARG00000095106|4
tctggatcatggaggacacacgaggattacagcaggactgcacaaat
>ENSDARG00000098167|4
tctggatcatggaggacacacgaggattacagcaggactgcacaaat
>ENSDARG00000098220|4
tctggatcatggaggaaagaagaggattacaacaggaccacgcaaat
>ENSDARG00000098351|4
tctggatcatggaggacacacgaggattatagcaggactgcacaaat
>ENSDARG00000098357|4
tctggatcatggaggagagaagaggattacagcaggactgcacaaat
>ENSDARG00000098406|4
tctggatcatggaggagagacgaggattacagcaggaccacgcaaat
>ENSDARG00000099152|4
tctggatcatggaggacacacgaggattacagcaggactgcacaaat
>ENSDARG00000099751|4
tctggatcatggaggagagaagaggattacagcaggactgcacaaat
>ENSDARG00000100669|4
tctggatcatggaggagagaagaggattacagcaggaccacgcaaat
>ENSDARG00000100669|4
tgtggatcatggaggagagaagatgattacagcaggactgcacaaat
>ENSDARG00000100743|4
tctggatcatggaggagagaagaggattacagcaggaccacgcaaat
>ENSDARG00000100743|4
tctggatcatggaggagagacgaggattacagcaggaccacgcaaat
>ENSDARG00000100777|4
tctgtatcatggaggacacatgaggattactgcaggaccacgcaaat
>ENSDARG00000101916|4
tctggatcatggaggaaagaagaggattacaacaggaccacacaaat
>ENSDARG00000102262|4
tctagatcatggaggaaagaagaggattacaacaggaccacgcaaat
>ENSDARG00000103119|4
tctggatcatggaggacacaagaggatcacagcaggaccacgcaaat
>ENSDARG00000103381|4
tctggatcatggaggagagaagaggattacagcaggaccacacaaat
>ENSDARG00000103755|4
tctgaatcatggagaagagatgaggattacagcaggaccacacaaat
>ENSDARG00000103946|4
tctggatcatggaggacacacgaggattacagcaggacttcaaaaat
>ENSDARG00000104026|4
tctggatcatggaggagagaagaggattacagcaggaccacgcaaat
>ENSDARG00000104704|4
tctggatcatggaggagagacgaggattacagcaggaccacgcaaat
>ENSDARG00000104956|4
tctggatcatggaggagagacgaggattacagcaggactgcacaaat
>ENSDARG00000105119|4
tctggatcatggaggacacacaaggattacagcaggaccacgcaaat
>ENSDARG00000110810|4
tctggatcatggaggagagacgaggattacagcaggactacgcaaat
>ENSDARG00000110878|4
tctggatcatggaggacacacgaggattacagcaggaccacgcaaat
>ENSDARG00000112648|4
tctgaatcatggagaagagatgaggattacagcaggaccacacaaat
>ENSDARG00000113660|4
tctggatcatggaggagagacgaggattacagcaggaccacgcaaat
>ENSDARG00000113690|4
tctggatcatggaggagagacgaggattacagctggactacacaaat
>ENSDARG00000115029|4
tctggatcatggaggagagacgaggattacagcaggaccacgcaaat
>ENSDARG00000116197|4
tctggatcatggaggacacacgaggattacagcaggaccacgcaaat
>ENSDARG00000043792|4
tctggatcatggaggagaaatgaggattacagctggaccacacaaat
>ENSDARG00000068161|4
tctggatcatggaggagagacgaggattacagcaggaccacgcaaat
>ENSDARG00000077220|4
tctggatcatggaggacccacgaggattacagcaggaccacgcaaat
>ENSDARG00000078167|4
tctggatcatggaggacacacgaggattacagcaggaccacgcaaaa
>ENSDARG00000086130|4
tctgtatcatggaggacacacgaggattacagcaggaccacgcaaat
>ENSDARG00000087251|17
tgtggatcacacaggagcgaagagaattacagcaggaccacgcaaat
>ENSDARG00000087293|4
tcttgatcatggaggagagcagaggattacagcaggactgcacaaat
>ENSDARG00000087597|4
tctggatcatggaggagagacgaggattacagcaggactaaacaaat
>ENSDARG00000088301|4
tctagatcatggaggagagacgaggattacagcaggaccacgcaaat
>ENSDARG00000089296|4
tctggatcatggaggagagacgaggattacagcaggaccacacaaat
>ENSDARG00000089852|4
tctggatcatggaggacacacaaggattacagcaggaccacgcaaat
>ENSDARG00000090947|4
tctggatcatggaggagagaagaggattacagcaggaccacacaaat
>ENSDARG00000091013|4
tctgaatcatggaggagagacgaggattacagcaggaccacgcaaat
>ENSDARG00000091026|4
tctggatcatggaggagagaagtggattacagccggactgcacaaat
>ENSDARG00000091561|4
tctggatcatggaggagagaagaggattacagcaggactacacaaat
>ENSDARG00000095013|4
tctggattatggaggagagacgaggattacagcaggaccacgcaaat
>ENSDARG00000095132|4
tctggatcatggaggagagaagtggattacagcaggactgcacaaat
>ENSDARG00000095200|4
tctggatcatggaggagagaagagaattacagcaggactgcacaaat
>ENSDARG00000095275|4
tctggatcatggaggacacacaatgatgacagcaggaccacgcaaat
>ENSDARG00000095293|4
tctggatcagggaggagagacgaggattacagcaggaccacgcaaat
>ENSDARG00000095696|4
cgtggatcatggaggagaaaataggataacagcaggactgcacaaat
>ENSDARG00000098115|4
tctggatcatagaggagagcagaggattaaagaagggctgcacaaat
>ENSDARG00000098177|4
tctggatcatggaggacaaacgaggattacagcaggaccacgcaaat
>ENSDARG00000098183|4
tctggatcatggaggagaaatgaggattacagctggaccacacaaat
>ENSDARG00000098218|4
tctggatcatggaggagagacgaggattacagcaggaccacgcaaat
>ENSDARG00000098279|4
tctggatcatggaggagagacgaggattacagcaggaccacacaaat
>ENSDARG00000098305|4
tctggatcatggaggagagaagatgattacagcaggaccacgcaaat
>ENSDARG00000098369|4
tctggatcatggaggacacacgaggattacagcaggaccacgcaaat
>ENSDARG00000098390|4
tctggatcatggaggacacatgaggattacagcaggaccacgcaaat
>ENSDARG00000098452|4
tctggatcatggaggacacacgaggattacagcaggaccgcacaaat
>ENSDARG00000098585|4
tgtgaatcatggaggagagaagaggattacagcaggactgctcaaat
>ENSDARG00000098610|4
tctggatcatggaggagggaagaggattacagcaggaccatgcaaat
>ENSDARG00000098879|4
tctggatcatggaggacacacaaggattacagcaggaccacgcaaat
>ENSDARG00000098928|4
tctggatcatggagcagagacgaggattacagcaggaccacgcaaat
>ENSDARG00000099046|4
tctggatcatggagaagagaagaggattacagctggaatacacaaat
>ENSDARG00000099046|4
tctggatcatggaggagacacaagaattacagctggactacacaaat
>ENSDARG00000099381|4
tctggatcatggaggagagacgaggattacagcaggaccacgcaaat
>ENSDARG00000099432|4
tctggatcatggaggacacacaaggattacagcaggacaacgcaaat
>ENSDARG00000099711|4
tctggaccatggaggagagacgaggattacagcaggaccacgcaaat
>ENSDARG00000099899|4
tctggatcatggaggaaaaacaaggattacagcaggaccacgcaaat
>ENSDARG00000100110|4
tctggatcatggaggagacatgaggattacagcaggaccatgcaaat
>ENSDARG00000100219|4
tctggatcatggaggagacacaaggattacagcaggactgcacaaat
>ENSDARG00000100311|4
tctggatcatgtaggagacatgaggattaccgcaggaccacgcaaat
>ENSDARG00000100341|4
tctggatcatggaggagagaagaggattacagcaggaccacgcaaat
>ENSDARG00000100348|4
tctggatcatggaggagagacgaggattacagcaggaccacgcaaat
>ENSDARG00000100460|4
cttggatcatggaggagacacaaggattactgcaggactgcacaaat
>ENSDARG00000100865|4
tctggatcatggaggacacatgcggattacagcaggaccgcgcaaat
>ENSDARG00000101272|4
tctggatcatggaggagagacgaggattacagcaggaccacacaaat
>ENSDARG00000101274|4
tctggatcatggaggagagacgaggattacagcaggaccacgcaaat
>ENSDARG00000101374|4
tctgaatcatggaggagagaagaggattacagcaggaccacgcaaat
>ENSDARG00000101374|4
tctggatcatggaggacacacgaggattacagcaggaccacgcaaat
>ENSDARG00000101389|4
tctggatcatggaggagagacaaggattacagctggactacacaaat
>ENSDARG00000101450|4
tttggatcatggaggagagacgaggattacagcaggaccacacaaat
>ENSDARG00000101484|4
tctggatcatggaggagagaagtggtttacagcgggactacacaaat
>ENSDARG00000101571|4
tctggatcatggaggacacacgaggattacagcaggaccgcgcaaat
>ENSDARG00000101653|4
tctggatcatggaggagagacgaggattacagcaggaccacgcaaat
>ENSDARG00000101757|4
tctggatcatggaggagagacgaggattacagcaggactgcacaaat
>ENSDARG00000101948|4
cctggatcatggaggagagacgaggattacagcaggaccacacaaat
>ENSDARG00000102215|4
tctggatcatggaggagagacgaggattacagcaggaccacacaaat
>ENSDARG00000102225|4
tctggatcatggaggacacacgaggattacagcaggaccacgcaaat
>ENSDARG00000102432|4
tctggatcatggaggacacacgaggattacagcaggaccacgcaaat
>ENSDARG00000102468|4
tctggatcatggaggagagacgaggattacagcaggaccacgcaaat
>ENSDARG00000102595|4
tctggatcatggaggacacacgaggatcacagcaggaccacgcaaat
>ENSDARG00000102616|4
tctggatcatggaggagagacgaggattacagcaggactacacaaat
>ENSDARG00000102638|4
tctggatcatggaggagagacgaggattacagcaggaccacacaaat
>ENSDARG00000102713|4
tctggatcatggaggagagaagaggattacagcaggaccacgcaaat
>ENSDARG00000102927|4
tctggatcatggaggacacacgaggattacagcaggaccacgcaaat
>ENSDARG00000103003|4
tctggatcatggaggacgcacgaggattacagcaggaccacgcaaat
>ENSDARG00000103197|4
tctggatcatggaggacacacgaggattacagcaggaccacgcaaat
>ENSDARG00000103265|4
tctggatcatggaggagagaagaggattacagcaggaccatgcaaat
>ENSDARG00000103281|4
tctggatcatggaggacacacgaggattacagcaggatcacgcaaat
>ENSDARG00000103992|4
tctggatcatggaggagagacgaggattacagcaggactgcacaaat
>ENSDARG00000104008|4
tctggatcatggaggagagacgaggattacagcaggactacacaaat
>ENSDARG00000104088|4
tctggatcatggaggacacacgaggattacagcaggaccacgcaaat
>ENSDARG00000104166|4
tctgaatcatggaggagagacgaggattacagcaggaccacacaaat
>ENSDARG00000104266|4
tctggatcatggaggacacacgaggattacagcaggaccacgcaaat
>ENSDARG00000104341|4
tctggatcatggaggagacacaaggattacagcaggaccacacaaat
>ENSDARG00000104476|4
tctggatcatggaggacacacgaggattacagcaggaccacgcaaat
>ENSDARG00000104804|4
tctggatcatggaggagagatgaggattacagcaggacctcgcaaat
>ENSDARG00000104890|4
tctggatcatggaggagagacgaggattacagcaggaccacacaaat
>ENSDARG00000104893|4
tctggatcatggaggagagacgaggattacagcaggaccacgcaaat
>ENSDARG00000104916|4
tctggatcatggaggagagacgaggattacagcaggaccacgcaaat
>ENSDARG00000104968|4
tctggatcatggaggagagacgaggattacagcaggaccacacaaat
>ENSDARG00000105161|4
tctggatcatggaggacacacgaggattacagcaggaccacgcaaat
>ENSDARG00000113431|4
tctggatcatggaggagagacgaggattacagcaggaccacgcaaat
>ENSDARG00000113527|4
tctggatcatggaggacacacgaggattacagcaggaccacgcaaat
>ENSDARG00000113804|4
tctggatcatggaggagagacgaggattacagcaggaccacacaaat
>ENSDARG00000113826|4
tctggatcatggaggagagacaaggattacagcaggaccacgcaaat
>ENSDARG00000113896|4
tctggatcatggaggagagatgaggattacagcaggacctcgcaaat
>ENSDARG00000114142|4
tctggatcatggaggacacacgaggattacagcaggactgcacaaat
>ENSDARG00000114142|4
tctggatcatggaggagagacgaggattacagcaggaccacgcaaat
>ENSDARG00000114577|4
tctggatcatggaggacacacgaggattacagcaggaccacgcaaat
>ENSDARG00000115299|4
tctggatcatggaggagggaagaggattacagcaggaccatgcaaat
>ENSDARG00000116367|4
tctggatcatggaggagggaagaggattacagcaggaccatgcaaat
>ENSDARG00000116915|4
tctggatcatggaggacacacgaggattacagcaggactgcacaaat
>ENSDARG00000034095|4
tctggatcatggaggacacacgaggattacagcaggaccacgcaaat
>ENSDARG00000068127|8
tgtgagtcatgatggtcatttcagaattacacaaggacttcaaaaat
>ENSDARG00000068453|11
agttttcactgggggggtctgcggtcaccaaccaggactgcacaaat
>ENSDARG00000069627|8
tttcagctattgtggagagttcaggatcacaccaggattacagaaat
>ENSDARG00000074345|3
tctgggtcatggaggggaattcaggactatatcaacactacacaaat
>ENSDARG00000078002|5
tttggaacatgagggcaagtttaggatcgcagctggtttacgaagat
>ENSDARG00000078246|1
tttagatggtggaggacacttcaggatcacattaggactgagaaaat
>ENSDARG00000078620|1
aactgatcctatgggtgaccacttgatgaaacccgggatagtgaagt
>ENSDARG00000086418|17
catggataatgcagcagcatgcaggattacaacaggactacagaaat
>ENSDARG00000086897|15
tgtggatcatggaggagaattcaggcttacaacaggactacacaaat
>ENSDARG00000087518|4
tctggatcatggaggacacacgaggattacagcaggaccacgcaaat
>ENSDARG00000087532|17
tgtggatcatggagcggagttcaggattacaactggaccacagaaat
>ENSDARG00000087714|4
tctggatcatggaggacacacgaggattacagcaggactgcacaaat
>ENSDARG00000087788|4
tctggatcatggaggacacacgaggattacagcaggaccacgcaaat
>ENSDARG00000088245|4
tctggatcatggaggacacacgaggattacagcaggaccacgcaaat
>ENSDARG00000088836|4
tctggatcatggaggacacacgaggattacagcaggaccacgcaaat
>ENSDARG00000088870|4
tctggatcatggaggagagaagaggattacagcaggactgcacaaat
>ENSDARG00000089079|3
tgtggatcatggaggagaattcaggactgtatcaacactacacaaat
>ENSDARG00000089179|4
tctggatcatggaggacacatgaggattacagcaggaccacgcaagt
>ENSDARG00000090033|4
tctggatcatggaggacacacgaggattaaagcaggaccgcgcaaat
>ENSDARG00000090192|4
tctggatcatggaggagagacgaggattacagcaggaccacgcaaat
>ENSDARG00000090392|4
tctggatcatggaggacacacgaggattacagcaggaccacgcaaat
>ENSDARG00000090461|4
tctggatcatggaggacacacgaggattacagcaggaccacgcaaat
>ENSDARG00000090734|4
tctggatcatggaggacacacgaggattacagcaggaccactcaaat
>ENSDARG00000090946|17
tatggaccatggaggaagaatcaggattatgacaggaccacacaaat
>ENSDARG00000091381|4
tctggaccatggaggagagaagatgattaaagcaggaccacgcaaat
>ENSDARG00000091746|4
tctggatcatggaggacacacaaggattacagcaggactgcacaaat
>ENSDARG00000091912|1
ttgggatcatggaggccatttcagaatcacaccaggactgagaaaat
>ENSDARG00000092070|1
tttggatcatggtggacatttcaggaatacaccagggctgagaaaat
>ENSDARG00000092294|1
tttggaccacaaagagacttttaggattacacctggtatgagaaaat
>ENSDARG00000092500|1
tttggatcacggaggacatttaagaatcagacgaggactaagaaaat
>ENSDARG00000092604|1
tttagagagtggaggagacttcagaatcacatcaggattaagaaaat
>ENSDARG00000092941|1
tttggaccatggaggacattttaggatcacaccaggcctaagaaaat
>ENSDARG00000092984|1
tttggatcatggaggacattttaggatcacaccaggcctaagaaaat
>ENSDARG00000093177|1
tttggaccatggaggacatttcaggatcacatctggattgagaaaat
>ENSDARG00000093323|1
tttagatcatggagaacagtcaagaatcgcaccaggactaaaaaaat
>ENSDARG00000093803|4
tctggatcatggaggacacacgaggattacagcaggaccacgcaaat
>ENSDARG00000093975|1
tttggatcatggaggacatttaagaatcatacgaggactaagaaaat
>ENSDARG00000094098|17
tgtggatcatggaggagacatcaggatcaaaacaggaccacagaaat
>ENSDARG00000094246|1
tttggaccatggaggacatttcaggatcacatctggattgagaaaat
>ENSDARG00000094297|1
tttggaccatgctgcatatttccgaatcaccccaggactgagaaaat
>ENSDARG00000094344|1
tttggaccatggaggacttccatgtatgacacctggactgagaaaat
>ENSDARG00000094346|1
tttgcaccatggaggattatacagaatcatgcctggactgacaaaat
>ENSDARG00000094608|1
tttggaccatggaggacatttgaggatcaagcaaggatttctgaaat
>ENSDARG00000095274|17
tttaaatcatggaggaaagaacaggattatacaaggaccacagaaat
>ENSDARG00000095578|1
tgtggacaatggaggtgctttaagaatcacaccaggactgaataaat
>ENSDARG00000095717|4
cgtggatcatggaggagaaaataggataacagcaggactgcacaaat
>ENSDARG00000095717|4
tgtggatcatggaggacaacagaggattacagcaggactgcacaaat
>ENSDARG00000095719|1
tttggaccatggaggacatttgaggatcaagcaaggatttttgaaat
>ENSDARG00000095773|1
tttggaccatggaggactttcatatatgacacctggactgagaaaat
>ENSDARG00000096449|8
cttgagttacagtggccatttcaggatcacaccaggactgcaaaaat
>ENSDARG00000098189|4
tctggatcatggaggagagacgaggattacagcaggaccacacaaat
>ENSDARG00000098383|4
tctggatcatggaggacacatgaggattacagcaggaccacgcaagt
>ENSDARG00000098444|4
tctggatcatggaggagagacgaggattacagcaggaccacgcaaat
>ENSDARG00000098515|4
tctggatcatggaagagagacgaggattacagcaggactacacaaat
>ENSDARG00000098706|1
tttggattatgaaggacatttcaggatcatatctggactgaggaaat
>ENSDARG00000099112|4
tctggatcatggaggagagacgaggattacagcaggaccacgcaaat
>ENSDARG00000099262|4
tctggatcatggaggagagacaaggattacagccggactacacaaat
>ENSDARG00000099327|4
tctggatcatggaggagagacgaggattacagcaggaccacgcaaat
>ENSDARG00000099825|4
tctggatcatggaggagaaacaaggattacagcaggaccacgcaaat
>ENSDARG00000100006|4
tctggatcatggaggagagacgaggattacagcaggaccacgcaaat
>ENSDARG00000100061|4
tctggatcatggaggacacacaaggattacagcaggaccacgcaaat
>ENSDARG00000100164|4
ggtggatcatggtggagagttcaggattacagcaggactacgtaaat
>ENSDARG00000100302|4
tctggatcatggaggacacacgaggattacagcaggaccacgcaaat
>ENSDARG00000100386|4
tctggatcatggaggacacacgaggattacagcaggactgcacaaat
>ENSDARG00000100412|4
tctggatcatggaggacacatgaggattacagcaggaccacgcaagt
>ENSDARG00000100464|4
tctggatcatggaggagagacgaggattacagcaggaccacgcaaat
>ENSDARG00000100556|4
tctggatcatggaggacacacgaggattacagcaggaccacgcaaat
>ENSDARG00000100654|4
tctggatcatggaggagagaagaggattacagcaggactgcacaaat
>ENSDARG00000101071|4
tctggatcatggaggacacacgaggattacagcaggaccacgcaaat
>ENSDARG00000101312|4
tctggatcatggaggacacacgaggattacagcaggaccacgcaaat
>ENSDARG00000101351|4
tctggatcatggaggacacacgaggattacagcaggactgcacaaat
>ENSDARG00000101388|4
tctggatcatggaggagagaagatgattacagcaggaccacgcaaat
>ENSDARG00000101421|4
tctggatcatggaggagagaagaggattacagcaggaccacgcaaat
>ENSDARG00000101459|4
tctggatcatggaggacacacgaggattacagcaggaccacgcaaat
>ENSDARG00000101459|4
tctggatcatggaggagagacgaggattacagcaggaccacgcaaat
>ENSDARG00000101469|4
tctggatcatggaggacgcacgaggattacagcaggaccacgcaaat
>ENSDARG00000101551|4
tctggatcatggaggacacacgaggattacagcaggaccacgcaaat
>ENSDARG00000101598|4
tctggatcatggaggacacacgaggattacagcaggactgcacaaat
>ENSDARG00000101689|4
tctggatcatggaggacacacgaggattacagcaggaccacgcaaat
>ENSDARG00000101689|4
tctggatcatggaggacacacgaggattacagcaggactgcacaaat
>ENSDARG00000101695|4
tctggatcatggaggacacacgaggattacagcaggaccacgcaaat
>ENSDARG00000101695|4
tctggatcatggaggacacacgaggattacagcaggaccgcgcaaat
>ENSDARG00000101695|4
tctggatcatggaggacacacgaggattacagcaggactgcacaaat
>ENSDARG00000101728|4
tctggatcatggaggagagacgaggattacagcaggactacacaaat
>ENSDARG00000101828|4
tctggatcatggaggacacacaaggattacagcaggaccacgcaaat
>ENSDARG00000101992|4
tctggatcatggaggagagaagaggattacagcaggactgcacaaat
>ENSDARG00000101997|4
tctggatcatggaggacacacgaggattacagcaggactgcacaaat
>ENSDARG00000101997|4
tctggatcatggaggagagacaaggattacatcaggaccacgcaaat
>ENSDARG00000102475|4
tctggatcatggaggacacacgaggattacagcaggaccacgcaaat
>ENSDARG00000102542|4
tctggatcatggaggacacacgaggattacagcaggaccacgcaaat
>ENSDARG00000102575|4
tctggatcatggaggagagacgaggattacagcaggactacacaaat
>ENSDARG00000102904|4
tctggatcatggaggacacacgaggattacagcaggactgcacaaat
>ENSDARG00000103143|4
tctggatcatggaagacaaacgaggattacagcaggaccacgcaaat
>ENSDARG00000103324|4
tctggatcatggaggagagacgaggattacagcaggaccacgcaaat
>ENSDARG00000103330|1
tttggatcatgggggcctatttagaatgacaccaggaatgagaaaat
>ENSDARG00000103829|1
tttggaccatggaggacattttaggatcaaacctggactaaaaaaat
>ENSDARG00000103844|4
tctggatcatggaggagagacgaggattacagcaggaccacacaaat
>ENSDARG00000104064|4
tctggatcatggaggacacacgaggattacagcaggaccacgcaaat
>ENSDARG00000104380|4
tctggatcatggaggagagaagaggattacagcaggaccacgcaaat
>ENSDARG00000104412|4
tctggatcatggaggacacacgaggattacagcaggaccacgcaaat
>ENSDARG00000104415|1
tgtggacaatggaggtgctttaagaatcacaccaggactgaataaat
>ENSDARG00000104416|4
tctggatcatggaggacacatgaggattacagcaggaccacgcaaat
>ENSDARG00000104787|4
tctggatcatggaggacacacgaggattacagcaggaccacacaaat
>ENSDARG00000104850|4
tctggatcatggaggacacacgaggattacagcaggactgcacaaat
>ENSDARG00000104897|4
tctggatcatggaggagagaagaggattacagcaggaccacacaaat
>ENSDARG00000104897|4
tctggatcatggaggagagacgaggattacagcaggaccacgcaaat
>ENSDARG00000104966|4
tctggatcatggaggagagacgaggattacagcaggaccacgcaaat
>ENSDARG00000105063|4
tctggatcatggaggagagacgaggattacagcaggaccacgcaaat
>ENSDARG00000105091|4
tctggatcatggaggacacacgaggattacagcaggactgcacaaat
>ENSDARG00000105095|KN149688.2
tctggatcatggaggacacacgaggattacagcaggaccacgcaaat
>ENSDARG00000105095|KN149688.2
tctggatcatggaggagagacgaggattacagcaggaccacgcaaat
>ENSDARG00000105266|4
tctggatcatggaggacacacgaggattacagcaggaccacgcaaat
>ENSDARG00000111518|4
tctggatcatggaggacacacgaggattacagcaggactgcacaaat
>ENSDARG00000112632|4
tctggatcatggaggacacacgaggattacagcaggaccacgcaaat
>ENSDARG00000114935|4
tctggatcatggaggacacacaaggattacagcaggaccacgcaaat
>ENSDARG00000114935|4
tctggatcatggaggacacacgaggattacagcaggactgcacaaat
>ENSDARG00000116086|4
tctggatcatggaggacacacgaggattacagcaggaccacgcaaat
