# Supplementary material for: Copy number variation and population-specific immune genes in the model vertebrate zebrafish
Source: eLife. 2024 Jun 4;13:e98058. doi: 10.7554/eLife.98058 (PMC11192531; doi:10.7554/eLife.98058)
Supplement: Figure 2—source data 2. [file elife-98058-fig2-data2.xlsx]

## Sheet: RNA_baits
bait name (with a GRCz10-based position)	bait sequence
1:6879543-6880154_0	CATTGCATTAAAATGTTGCAGTAATCTATGAAAGTAACTTCTAAAAGGTGACCAAGAGGCTGCGTGCCTTCATTAAACGTTTCTGGCGGCTCAGTAAGTTTTCTCGCTTTTGGCCAATGT
1:6879543-6880154_62	CGTGCCTTCATTAAACGTTTCTGGCGGCTCAGTAAGTTTTCTCGCTTTTGGCCAATGTCACAGTCCTCTTTAAGCAGGTTGTCTACACCGTCTTTATCTTGCAGCAGCTGTAACATGTTC
1:6879543-6880154_124	GTCCTCTTTAAGCAGGTTGTCTACACCGTCTTTATCTTGCAGCAGCTGTAACATGTTCCTTTGCAGCTCCAAAGCAGCTTCCTGCAGCAGCATGTAGCGGATCACCATTGGGATCTGGTC
1:6879543-6880154_186	GCAGCTCCAAAGCAGCTTCCTGCAGCAGCATGTAGCGGATCACCATTGGGATCTGGTCAGCTAGACGCTTGCTTGCAATCTGTTACGGTAGATTAGACAGCATCTCAGATATACATTTAA
1:6879543-6880154_248	AGACGCTTGCTTGCAATCTGTTACGGTAGATTAGACAGCATCTCAGATATACATTTAAAATGAATCTACCTCTGCATAGAAAGTTTATTAGACACTTACTGTGTAGTAGGATTTAAGGTG
1:6879543-6880154_310	AATCTACCTCTGCATAGAAAGTTTATTAGACACTTACTGTGTAGTAGGATTTAAGGTGCAACCTCATCTCACGCAAGGTGGCATGATTGTCTGTGCCAAGGTCGAAACTCGAAAGTAAGG
1:6879543-6880154_372	CTCATCTCACGCAAGGTGGCATGATTGTCTGTGCCAAGGTCGAAACTCGAAAGTAAGGGCAGTTTTATTTTCGGTTGTGGCCTTTCTTTTTCCATCTCCTCCAATTTATCCTTTGCATGC
1:6879543-6880154_434	TTTTATTTTCGGTTGTGGCCTTTCTTTTTCCATCTCCTCCAATTTATCCTTTGCATGCTTTAGACTCTGGCTGTATGTGCCATCTTGGCTGTAAACGATGAGCTCCATCTTGAATTGAGT
1:6879543-6880154_491	CTTTAGACTCTGGCTGTATGTGCCATCTTGGCTGTAAACGATGAGCTCCATCTTGAATTGAGTTTTCAGCATAGATTCTGCCAGGGATTCTTTGTTTAGCTTAATGCCTTCAATCTTAGT
1:6881834-6882100_0	TTTGCTATTTTCAGAAGATTAGGGAATCCAATGAAACTGCACTGGGCCAGTTGGATGAACTTCTTTCTAACCACATCTGTGCAAAAACAAACACACTGTTGATTATAACTTTTAATTTCA
1:6881834-6882100_49	GTTGGATGAACTTCTTTCTAACCACATCTGTGCAAAAACAAACACACTGTTGATTATAACTTTTAATTTCAATCTTGATCATCCAGCAAACCCTGTTTTGTTACTGTTATTACTCTGTAC
1:6881834-6882100_98	TTGATTATAACTTTTAATTTCAATCTTGATCATCCAGCAAACCCTGTTTTGTTACTGTTATTACTCTGTACTAAATATCTAAACCTTTACCTCAAATAAATTTTACAGTGCCTTTAAAAC
1:6881834-6882100_146	TTGTTACTGTTATTACTCTGTACTAAATATCTAAACCTTTACCTCAAATAAATTTTACAGTGCCTTTAAAACAAAAACATCTTGAACAAACTTGGGTTACATCAAGGTCTTCAGTTCATT
1:6882476-6883948_0	AGAGACGGTCTTCAGTGTCTTTAACGCAGGTTCCTCCAACAGCTTGATCTGGTCCCTGACAAGCCCCTCAAAGGTCTTGTAGTTGATGAATCCTGGTAGCTCTCTTCCCCGGTACTTGAC
1:6882476-6883948_62	GCCCCTCAAAGGTCTTGTAGTTGATGAATCCTGGTAGCTCTCTTCCCCGGTACTTGACTTCGTAGTTATCAACTTCTTTCTCAATCTTTTTGTTGACTGCAAAGGGTTTTTGAACACCGT
1:6882476-6883948_124	TAGTTATCAACTTCTTTCTCAATCTTTTTGTTGACTGCAAAGGGTTTTTGAACACCGTTAGAAAATAAATCGCATATCTCAGTTATGAGCATAGCTTTTCAAAGTGCTTCTAATTTAGTA
1:6882476-6883948_186	AAATAAATCGCATATCTCAGTTATGAGCATAGCTTTTCAAAGTGCTTCTAATTTAGTAACTTAGGTTGGAAATTAAAATGGAATGCATCAGATGAGAGAACTTTTTTTAAAGCTAATTTA
1:6882476-6883948_248	AGGTTGGAAATTAAAATGGAATGCATCAGATGAGAGAACTTTTTTTAAAGCTAATTTAATAGTTACTTAGATAAAATAGCAGGTTAGCCAAAAACAAAAGTGCAGTCAAGAGATGATATG
1:6882476-6883948_310	TTACTTAGATAAAATAGCAGGTTAGCCAAAAACAAAAGTGCAGTCAAGAGATGATATGCTTTCCTCACATGAATCCCCTGAACGATCCAAGATGTGACTCCATTTTGCAAATTCTTGCCG
1:6882476-6883948_372	CCTCACATGAATCCCCTGAACGATCCAAGATGTGACTCCATTTTGCAAATTCTTGCCGAAGTTCTGGGAAAAGCAGTAGATCTGTAGTACATTTAACATCCTCCCCAGTCGTCAGGTTCA
1:6882476-6883948_434	TCTGGGAAAAGCAGTAGATCTGTAGTACATTTAACATCCTCCCCAGTCGTCAGGTTCAGCATATCTTGATTGAAAGCTGTAACTTTCTAAATTTGGAGATGATATTTGAAAGATTTAAGT
1:6882476-6883948_496	ATCTTGATTGAAAGCTGTAACTTTCTAAATTTGGAGATGATATTTGAAAGATTTAAGTAACTTAATAATGTAAGTATAACTTTACCAATCAGTTATATTTAAAAAATTATTTCATTTCAA
1:6882476-6883948_558	TAATAATGTAAGTATAACTTTACCAATCAGTTATATTTAAAAAATTATTTCATTTCAAATTACACTCACGTCAATGAAAAAGCTGAGTCTTGCTGCTGGTTCTGATGGAGGCCCATTGCC
1:6882476-6883948_620	CACTCACGTCAATGAAAAAGCTGAGTCTTGCTGCTGGTTCTGATGGAGGCCCATTGCCATATGCCTCTAGTTCCTTCTGTGTTTCAGCAAGCTTTGTCTCTATTTGCTCTTCTAGGCGAG
1:6882476-6883948_682	GCCTCTAGTTCCTTCTGTGTTTCAGCAAGCTTTGTCTCTATTTGCTCTTCTAGGCGAGGTAGAGATTTCTACAAAGGCAAATATAAAGTTGAGCTATTTTTGTCATGCATTTAAAAATCC
1:6882476-6883948_744	AGATTTCTACAAAGGCAAATATAAAGTTGAGCTATTTTTGTCATGCATTTAAAAATCCTGTTTGGTTCATTTGATAATAAAATGATTCACCTGAATGTGATGAACCAATTCAATTGTTAG
1:6882476-6883948_806	TGGTTCATTTGATAATAAAATGATTCACCTGAATGTGATGAACCAATTCAATTGTTAGTTTCTCTGCCAACTTGGGAATAGTAGCAAAACCCTCTTCATAGAGTTTGCTGTGAAAAATGC
1:6882476-6883948_868	TCTGCCAACTTGGGAATAGTAGCAAAACCCTCTTCATAGAGTTTGCTGTGAAAAATGCATAAATATATAACATGATATATAATGTCCCTTATATAAATTAAGAGTCCAAATAAAATGTAC
1:6882476-6883948_930	ATATATAACATGATATATAATGTCCCTTATATAAATTAAGAGTCCAAATAAAATGTACCGTTCAGCTGTTTTTCGTTTACATGAATAATGAGATGTGACCAGTTTAGTACCTGAAATGAG
1:6882476-6883948_992	CAGCTGTTTTTCGTTTACATGAATAATGAGATGTGACCAGTTTAGTACCTGAAATGAGGATGGTCTTTGAAGAAGGCACTCTCTGTTTCTGTAGCCTCATTTAGAGTGACCTGATCCATA
1:6882476-6883948_1054	GTCTTTGAAGAAGGCACTCTCTGTTTCTGTAGCCTCATTTAGAGTGACCTGATCCATAATCTCTTTTTGCCCTCTGCACCTTACAATCATGTAGCCTTTAGTGAGGTGAATGACCTCATT
1:6882476-6883948_1116	CTTTTTGCCCTCTGCACCTTACAATCATGTAGCCTTTAGTGAGGTGAATGACCTCATTGTGGACAATGTCTACAACTGTCCCTTCAGTGCCCTTGTCCACCAGGTCTGGCTTTGTTAAGA
1:6882476-6883948_1178	ACAATGTCTACAACTGTCCCTTCAGTGCCCTTGTCCACCAGGTCTGGCTTTGTTAAGATGCCTGTAGCAGAGATATAATACAACCAGACATTGCGACACATGATTTTAAAGAGGATGTTT
1:6882476-6883948_1240	TGTAGCAGAGATATAATACAACCAGACATTGCGACACATGATTTTAAAGAGGATGTTTGAATTAAAGCATTAAATGTAGAGAGTAATGCAAACCTAAAGTCCTTTCGCCATCAGGATCCT
1:6882476-6883948_1302	TAAAGCATTAAATGTAGAGAGTAATGCAAACCTAAAGTCCTTTCGCCATCAGGATCCTCTGCCTGAGCCATCTGCAATGCTTCTGTGGTGGCGATGTCAACATTGCATGGCACCACGACC
1:6882476-6883948_1352	AGGATCCTCTGCCTGAGCCATCTGCAATGCTTCTGTGGTGGCGATGTCAACATTGCATGGCACCACGACCAGGTTGATTGTCTCTTGCCTTGTAACAAACTTCCTGATTAGTCTTTTAAT
1:6884805-6885166_0	TGATCTCCAATGTTCTCAGGTTGACCCTTGACGGCCACTCGTGCAATGCCAGGGAGGTCAATGAGAGTGAGGTCAGGAACATTGGCAGAGGTGATCTGCAGACTGATGAGTTCTTCACTG
1:6884805-6885166_61	TGAGAGTGAGGTCAGGAACATTGGCAGAGGTGATCTGCAGACTGATGAGTTCTTCACTGATACCAACACCTGCTCCAGCCATCTCATCTTGGGCTGCAAACACAATAGGAAATAAGATAT
1:6884805-6885166_122	ACCAACACCTGCTCCAGCCATCTCATCTTGGGCTGCAAACACAATAGGAAATAAGATATTAACAAACTAAAAGTCCTAGTTTTCATTTAAAGCATTTTTACCTTGGCGGATCTTTTTCTC
1:6884805-6885166_183	ACAAACTAAAAGTCCTAGTTTTCATTTAAAGCATTTTTACCTTGGCGGATCTTTTTCTCCACTTCCGCTGGGTCATCGAAGTCCTCCTCATAGGTTTTGTAACTGATTCTCCCATGCCAC
1:6884805-6885166_241	CCACTTCCGCTGGGTCATCGAAGTCCTCCTCATAGGTTTTGTAACTGATTCTCCCATGCCACTTATCTTGGTCTTTAGTTCTTATCATCTTGAGCTCGAGAGGGCACCGTGTAACAATCC
1:6886504-6886786_0	ACTGCCCCTGGGTAACGGAACTCCTGACAGCGCCTCCAGAACCGAACTCTTTCCCGAGCTTTGGTCTCCTATGACGGCGATGGCAGGCAACGCGAGGTCCTTTTCGACTCCCAGAGACCG
1:6886504-6886786_54	CGAGCTTTGGTCTCCTATGACGGCGATGGCAGGCAACGCGAGGTCCTTTTCGACTCCCAGAGACCGTAAATTATCGATAGTGTCGATACAAGGGCGAATTTTCTCCTCATATTGCTGACT
1:6886504-6886786_108	TCCCAGAGACCGTAAATTATCGATAGTGTCGATACAAGGGCGAATTTTCTCCTCATATTGCTGACTGAACGTGTAACTCAACTTCTCCATCCTTAATAATGTCCAAAGACAAATCCTTAT
1:6886504-6886786_162	ATATTGCTGACTGAACGTGTAACTCAACTTCTCCATCCTTAATAATGTCCAAAGACAAATCCTTATCACAACAAAGTTTCAGATTACCCGACTGTCTGAACTAATGATGCTCGGCTTGCT
1:6890918-6891571_0	CGTGCAAGTTTACACGTTTGTTCCATGTGCTACATTTTTCAAGCTATATATAATTTGTAGCATTAAAACAGTTATAATTGACTATGAAGAGAATCCTAATAGGTAGCCAAGAGGTTTTGT
1:6890918-6891571_60	CATTAAAACAGTTATAATTGACTATGAAGAGAATCCTAATAGGTAGCCAAGAGGTTTTGTGCTTTCATTAAACGTTTCTGGCGGCTCAGTAAGTTTTCCCGCTTTTGACCAATGTCAAAA
1:6890918-6891571_120	GCTTTCATTAAACGTTTCTGGCGGCTCAGTAAGTTTTCCCGCTTTTGACCAATGTCAAAATCCTCTTTAAGCATGTCGTCTACACCGTCTTTATCTTGCAGCAGTTGCAGCATGCTCCTT
1:6890918-6891571_180	TCCTCTTTAAGCATGTCGTCTACACCGTCTTTATCTTGCAGCAGTTGCAGCATGCTCCTTTGCAGCTCCAAAGCGGCTTCTTGCAGCAGCAGATAGCGGATCACCATTGGGATCTGATCA
1:6890918-6891571_240	TGCAGCTCCAAAGCGGCTTCTTGCAGCAGCAGATAGCGGATCACCATTGGGATCTGATCAGCTAGACGCTGGCTTGCAATCTGTTATAAATAAGACCGCACCTCAGATAGCTGTGCATTA
1:6890918-6891571_300	GCTAGACGCTGGCTTGCAATCTGTTATAAATAAGACCGCACCTCAGATAGCTGTGCATTACAGTTTAAATTAATCTGCAGAAAAGCTTTAGCTGAAACTCTTACCATGTAGTAGGACTCG
1:6890918-6891571_360	CAGTTTAAATTAATCTGCAGAAAAGCTTTAGCTGAAACTCTTACCATGTAGTAGGACTCGAGATGCAGCTTCATCTCACTCAAAGTAGCATGATTGCTTGTGGCAATCCCTACAGTCATG
1:6890918-6891571_420	AGATGCAGCTTCATCTCACTCAAAGTAGCATGATTGCTTGTGGCAATCCCTACAGTCATGCAGTCAAAGTTTTCTGTGTCTTCCTCGTCCTCTTCCCGCTTTTCTTTTGAGCGAAGTAGG
1:6890918-6891571_480	CAGTCAAAGTTTTCTGTGTCTTCCTCGTCCTCTTCCCGCTTTTCTTTTGAGCGAAGTAGGCTCTGACTGTATGTGCCATCTTGAGTGTAAACTATGAGCTCCATCTTGAATTGAGTCCTC
1:6890918-6891571_533	AAGTAGGCTCTGACTGTATGTGCCATCTTGAGTGTAAACTATGAGCTCCATCTTGAATTGAGTCCTCAGCATGGATTCCGCCAAGCACTCTTTATCCTGCTTGATGGCTTCGATCTTAGT
1:6892050-6892300_0	ACTAGCAGAAACATTGACCTAAACACACACACACGCGCACAAAAATACCTTTGCTATTTTTAGAAGAATAGGAAAACCGGTGAAGCTGCTCTGGGCCAACTGGATGAACTTCTTTTTAAC
1:6892050-6892300_65	GAATAGGAAAACCGGTGAAGCTGCTCTGGGCCAACTGGATGAACTTCTTTTTAACCATGTCTATGTAGAAACAAGCACACTGTTAATTAGGATATACAGGAATCGGAGAGTGAATTTTAA
1:6892050-6892300_130	TAGAAACAAGCACACTGTTAATTAGGATATACAGGAATCGGAGAGTGAATTTTAATACCTTTTAAGACCTCATTACCACTTTAGGTTTCAACCCATAACTTGGCGACATTTTAACTTGCA
1:6893750-6894000_0	GTGAAGACCACATTTTTAATTAAGAAACTGTGGGAATAAATAGGATATTGTTAAAAATATACAGAACAAAACAAACCAGAGACGTTCTTCAGCATCTTTAACGCAGGTTCCTCCAACAAC
1:6893750-6894000_65	ACAAAACAAACCAGAGACGTTCTTCAGCATCTTTAACGCAGGTTCCTCCAACAACTTCATCTGTTCCCTGACAAGGCCCTCAAAGGTCTTGTAATTGATGAAACCTGGGAGTTCTCGTCC
1:6893750-6894000_130	CCCTGACAAGGCCCTCAAAGGTCTTGTAATTGATGAAACCTGGGAGTTCTCGTCCCCGGTACTTCACTTCATAGTTATCAACTTCTTCTTCAATCTTCAGTTTGACTGCAAAGGTTTTAT
1:6895838-6896345_0	AGAATATCCTGAAGAGTCTAAGAAGCTATTCCAATAGGCAAATTCCTGTCGAAGTTCTGGAAAAATCAGCAGTTTTGATGCGGATTTAACCTCCTCTCCAGTCGTCAGGTTGAGAGTGTC
1:6895838-6896345_65	TCAGCAGTTTTGATGCGGATTTAACCTCCTCTCCAGTCGTCAGGTTGAGAGTGTCACATGTAAAAGCTGTAACTTTCTAAATTCAGTAATGTCAAATATTTTAATTACTGGGGGATGTTG
1:6895838-6896345_130	GCTGTAACTTTCTAAATTCAGTAATGTCAAATATTTTAATTACTGGGGGATGTTGTTTACACTTTAATAAAGCATTTTGATGCTGTACTCACATCAATGAAAAAGCTGAGTCTTTCTGCA
1:6895838-6896345_195	AATAAAGCATTTTGATGCTGTACTCACATCAATGAAAAAGCTGAGTCTTTCTGCAGGGTCTGACGGGGGTCCATCACCATACGCTTCCAGTTCCTTCTGTGTTTCAGCAAGCTTGGTCTG
1:6895838-6896345_260	GGGGTCCATCACCATACGCTTCCAGTTCCTTCTGTGTTTCAGCAAGCTTGGTCTGGATTTGCTCTTCTAAACGAGGTAGGGACCTCTGCATAACAGATTGGTTATATGATTGTTACTTTT
1:6895838-6896345_325	TCTAAACGAGGTAGGGACCTCTGCATAACAGATTGGTTATATGATTGTTACTTTTAGTCTAAAGATTCTTCAATGTCTTTTTTGTCAGTATATATTATTTTACCTGAATGTGATGAACCA
1:6895838-6896345_387	AGATTCTTCAATGTCTTTTTTGTCAGTATATATTATTTTACCTGAATGTGATGAACCAACTCAATTGTTAGTTTCTCTGCCAACTTGGGAATAGTAGCAAAACCTTCTTCATAAAGTTTC
1:6897235-6898531_0	TGAAATGAGGATGGTCTTTGAAGAAGGCACTCTCTGTTTCTGTAGCCTCATTTAGAGTGACCTGATCCATAATCTCTTTTTGCCCTCTGCACCTTACAATCATGTAGCCTTTAGTGAGGT
1:6897235-6898531_62	TGATCCATAATCTCTTTTTGCCCTCTGCACCTTACAATCATGTAGCCTTTAGTGAGGTGAATGACCTCATTGTGGACAATGTCTACAACTGTCCCTTCAGTGCCCTTGTCCACCAGGTCT
1:6897235-6898531_124	GACCTCATTGTGGACAATGTCTACAACTGTCCCTTCAGTGCCCTTGTCCACCAGGTCTGGCTTTGTTAAGATGCCTGTAGTAGACAAATAATGGTTTTACAATTCTGATGGACTCTTTTT
1:6897235-6898531_186	TTGTTAAGATGCCTGTAGTAGACAAATAATGGTTTTACAATTCTGATGGACTCTTTTTGTATAACAAGTGCACTCAGTAATGCACACCTAAAGTCCTTTCGCCCTCGGGATCCTCTGCCT
1:6897235-6898531_248	AACAAGTGCACTCAGTAATGCACACCTAAAGTCCTTTCGCCCTCGGGATCCTCTGCCTGAGCCATCTGCAATGCTTCTGTGGTGGCGATGTCAACATTGCATGGCACCACAACCAGATTG
1:6897235-6898531_310	CATCTGCAATGCTTCTGTGGTGGCGATGTCAACATTGCATGGCACCACAACCAGATTGATTGTTTCCTGCTTGGTAATGAACATCCTGATCAGTCTCTTAATCTAGATAAAATAAATTTG
1:6897235-6898531_372	TTTCCTGCTTGGTAATGAACATCCTGATCAGTCTCTTAATCTAGATAAAATAAATTTGAATAATGTTACTGTCTCACTCTCAATGGACCAAATGTACTTTTAAAATGATTTTTTTTAGGT
1:6897235-6898531_434	ATGTTACTGTCTCACTCTCAATGGACCAAATGTACTTTTAAAATGATTTTTTTTAGGTGTAAAAGGTTTACCTGATCTCCAATGTTCTCAGGTTGACCCTTGACAGCCACTCGCGCAATG
1:6897235-6898531_496	AAGGTTTACCTGATCTCCAATGTTCTCAGGTTGACCCTTGACAGCCACTCGCGCAATGCCAGGGAGGTCAATGAGAGTGAGGTCAGGAACATTGGCAGAGGTGATCTGCAGACTGATGAG
1:6897235-6898531_558	GGAGGTCAATGAGAGTGAGGTCAGGAACATTGGCAGAGGTGATCTGCAGACTGATGAGTTCTTCACTGATACCAACACCTGCTCCAGCCATCTCATCTTGGGCTGCAAACACAATTAGAT
1:6897235-6898531_620	TCACTGATACCAACACCTGCTCCAGCCATCTCATCTTGGGCTGCAAACACAATTAGATGAAAGATTCAAGCGGTGTCCTTAATCATGAGTTCATGTAATAATGTTGCTGTTTGCGCATTA
1:6897235-6898531_682	GATTCAAGCGGTGTCCTTAATCATGAGTTCATGTAATAATGTTGCTGTTTGCGCATTACCAGCATCTACAACCCTCAAAGTTGCGAAGATATTTTCTTTTGTAGAATTCATGCTTTATTT
1:6897235-6898531_744	CATCTACAACCCTCAAAGTTGCGAAGATATTTTCTTTTGTAGAATTCATGCTTTATTTTATTACAAATCTAGAGTTTTTGAGAATCTTGCATTTCAGTACGGGGCCTGAAAGCTGGTAAA
1:6897235-6898531_806	ACAAATCTAGAGTTTTTGAGAATCTTGCATTTCAGTACGGGGCCTGAAAGCTGGTAAAACAGTGTCTGATATAATATTAAAAACTGTATTGGACATAAATCTAAACCTTTGCATGTTATT
1:6897235-6898531_868	TGTCTGATATAATATTAAAAACTGTATTGGACATAAATCTAAACCTTTGCATGTTATTAGATTTGTTTTATTAAAACTGAATACATATTTATTATATATAAATAAAAAATAGACTGAATG
1:6897235-6898531_930	TTGTTTTATTAAAACTGAATACATATTTATTATATATAAATAAAAAATAGACTGAATGACAGACTCAAAAATTCTGTGGACATCTGCAGGTGTCTGCTGACAGATTCTGTGTTGTTCTGC
1:6897235-6898531_992	ACTCAAAAATTCTGTGGACATCTGCAGGTGTCTGCTGACAGATTCTGTGTTGTTCTGCAAATGACTCAGTTGGACTTCCTCCTGGGTTTGTGACATTACAAATCCTAAAATTTACATAAA
1:6897235-6898531_1054	GACTCAGTTGGACTTCCTCCTGGGTTTGTGACATTACAAATCCTAAAATTTACATAAACCCTCCCCCGCCCCCTCCCCTTGGCAACCCTAAATTGCATTTCTACCTTCACGGATCTTTTT
1:6897235-6898531_1116	CCCCCGCCCCCTCCCCTTGGCAACCCTAAATTGCATTTCTACCTTCACGGATCTTTTTCTCCACTTCCGCTGGGTCATCAAAGTCTTCCTCGTGGTTTTGGTAACTGATTCTCCCATGCC
1:6897235-6898531_1176	CCACTTCCGCTGGGTCATCAAAGTCTTCCTCGTGGTTTTGGTAACTGATTCTCCCATGCCATTTCTCATCCTCTTTACTCCTTATCATCTTGAGCTCAAGAGGGCATCGTGTAACAATCC
1:6899144-6899426_0	ACTGCCCCTGGGTAACGGAACTCCTGACAGCGCCTCCAGAACCGAACTCTTTCCCGAGCTTTGGTCTCCTATGACGGCGATGGCAGGCAACGCGAGGTCCTTTTCGACTCCCAGAGACCG
1:6899144-6899426_54	CGAGCTTTGGTCTCCTATGACGGCGATGGCAGGCAACGCGAGGTCCTTTTCGACTCCCAGAGACCGTAAATTATCGATAGTGTCGATACAAGGGCGAATTTTCTCCTCATATTGCTGACT
1:6899144-6899426_108	TCCCAGAGACCGTAAATTATCGATAGTGTCGATACAAGGGCGAATTTTCTCCTCATATTGCTGACTGAACGTGTAACTCATCTTCTCCATTATCAATGTCCTATGTCAATATGTTAATAA
1:6899144-6899426_162	ATATTGCTGACTGAACGTGTAACTCATCTTCTCCATTATCAATGTCCTATGTCAATATGTTAATAAAAATAAACCCTTCTTTTCACAACACAACAAAATACCAGATGCTGAGCTTTCCTC
1:6920100-6920350_0	ACCTGACACAACTTACAGCATCTCCTCCGCGAGTTCACAGAAGTTCGGACGCAGAATCACACGAGGATCTCACAGCCACATTGTCAGATCTGTCATAAAGGAACGGGGTTGAAATAAACC
1:6920100-6920350_65	GATCTCACAGCCACATTGTCAGATCTGTCATAAAGGAACGGGGTTGAAATAAACCATCAGGACCCGAGGCAAACACACCACACTGTAATTTATGGCCGCCGAGGCGAACGCCGACTGACT
1:6920100-6920350_130	GAGGCAAACACACCACACTGTAATTTATGGCCGCCGAGGCGAACGCCGACTGACTAGTCAAAGTAAAGCGGGAAGGCAAAACACAAGCTGTGAAAAGCATTTATTAACTTTCACTCCCTA
1:8299759-8300045_0	TGTGTAAAAACAAAAAGGATTACCCAACTGCAGTGCAGCATGTAAATATAAAACATACTCATACTCATAATCATACACTGAGTATTAAGGATAGTTCCCTAAAATGCATTGTGCTGGAAA
1:8299759-8300045_56	ACTCATACTCATAATCATACACTGAGTATTAAGGATAGTTCCCTAAAATGCATTGTGCTGGAAAAAAGGAACATCCAGTAAGACATTTTAAATCAGGCTATCAGTCAAGCTATTTAGTTT
1:8299759-8300045_112	GCTGGAAAAAAGGAACATCCAGTAAGACATTTTAAATCAGGCTATCAGTCAAGCTATTTAGTTTCACTACCTCCTGTGACTCACGATGTTTGCCTGTTTGTTTTCCTTTATTATGTCTAC
1:8299759-8300045_166	TATTTAGTTTCACTACCTCCTGTGACTCACGATGTTTGCCTGTTTGTTTTCCTTTATTATGTCTACAGCTAAACTGCAGTTTACACACAGAAGAGGAGTAGACACAATAATGGCAGTCAG
1:8302026-8304590_0	ATGAGACTCGTAGGAACAATGACTGCCATAATCCTTATTATGTTCATTCTGGCTCAAGGTCTCGAGTGCTCCCAGACATGTAAATGTGATCAGATGTATTTCTGCAACTGTTCCTCAAAC
1:8302026-8304590_62	CGAGTGCTCCCAGACATGTAAATGTGATCAGATGTATTTCTGCAACTGTTCCTCAAACAACCTCCATCAGGTTCCAACAGTTCCATCAGATGTGCTTGGCCTTGACCTGTCTTTCAATCA
1:8302026-8304590_124	TCCATCAGGTTCCAACAGTTCCATCAGATGTGCTTGGCCTTGACCTGTCTTTCAATCAAATTGAGTCAATCAACATGACTGATCTCAGCTCTTACAATGAGCTGATAATCCTCAACTTGC
1:8302026-8304590_186	GAGTCAATCAACATGACTGATCTCAGCTCTTACAATGAGCTGATAATCCTCAACTTGCATAAGAACAAACTCAGGCATATACACAGGGATGCATTCAAGTCCCAACATAACCTGGAAGTT
1:8302026-8304590_248	GAACAAACTCAGGCATATACACAGGGATGCATTCAAGTCCCAACATAACCTGGAAGTTCTCGATCTCTCCTTAAACAACCTGAACAATCTCTCTCCGTCTTGGTTTCACAAGTTAAAATC
1:8302026-8304590_310	ATCTCTCCTTAAACAACCTGAACAATCTCTCTCCGTCTTGGTTTCACAAGTTAAAATCTCTCCAGCAACTTAACCTTGTAGGAAACCCATACTCAACTGTGGGACCTGCTCCAATCTTCA
1:8302026-8304590_372	CAGCAACTTAACCTTGTAGGAAACCCATACTCAACTGTGGGACCTGCTCCAATCTTCAAGTCTCTTGTAAACTTGAGGACACTTCACTTAGGTAGTCCTTCACTGAGAGAGCTACACAAG
1:8302026-8304590_434	TCTTGTAAACTTGAGGACACTTCACTTAGGTAGTCCTTCACTGAGAGAGCTACACAAGAATGGCCTAGATGTGCTCACTCATCTGGACGAGATGACATTTTTTGGCAGTAACCTGAGGTC
1:8302026-8304590_496	GCCTAGATGTGCTCACTCATCTGGACGAGATGACATTTTTTGGCAGTAACCTGAGGTCATATGAGAACGGGAGCTTGAAAGCAGCTCGTCCCATCGGTTCAGTCTCTTTGAGTCTACAGA
1:8302026-8304590_558	GAGAACGGGAGCTTGAAAGCAGCTCGTCCCATCGGTTCAGTCTCTTTGAGTCTACAGAATTTGTTTGAGAGTGATCCAGAACTAGTTTCCAAGGTCCTTCAAGATGTCTCCCACCCTGAA
1:8302026-8304590_620	GTTTGAGAGTGATCCAGAACTAGTTTCCAAGGTCCTTCAAGATGTCTCCCACCCTGAAACTCTGCTGATAATCAAAGATGTCACTATGAAAACAAACACATCTACAGAACCCTTCAAAAT
1:8302026-8304590_682	TGCTGATAATCAAAGATGTCACTATGAAAACAAACACATCTACAGAACCCTTCAAAATGGTGAAGGAAGGTGGCACTAAGAGCCTGACTTTCCAAAACTCCTCCACGACCGATCAAGCCT
1:8302026-8304590_744	AAGGAAGGTGGCACTAAGAGCCTGACTTTCCAAAACTCCTCCACGACCGATCAAGCCTTGACCTCTTTTTTAGAGTTCATGGATGGCTCTCCATTGTCTTTTATTGGACTTGAAGATATA
1:8302026-8304590_806	CTCTTTTTTAGAGTTCATGGATGGCTCTCCATTGTCTTTTATTGGACTTGAAGATATACAATTTGTTGGGATAGGAGAGTGGCAGAAAGCTAAATACACACATCATGACAGCCTACGCAC
1:8302026-8304590_868	TTGTTGGGATAGGAGAGTGGCAGAAAGCTAAATACACACATCATGACAGCCTACGCACAGCCTACTTGCGTAATATTGAAATAGAAGGTTTCTTTGGGTTTAGCAGCATGATAGAGTTGG
1:8302026-8304590_930	TACTTGCGTAATATTGAAATAGAAGGTTTCTTTGGGTTTAGCAGCATGATAGAGTTGGGATTTCTACTGAAGCACTTCCACAACGTGTCTGTGATCAATGCCACAGTGTTTGTGATTCCT
1:8302026-8304590_992	TCTACTGAAGCACTTCCACAACGTGTCTGTGATCAATGCCACAGTGTTTGTGATTCCTAAGGAAACCACATTCCTGTTGAAAAATCTAGAATACATGGACCTCAGCCAGAATCTCCTGAC
1:8302026-8304590_1054	AAACCACATTCCTGTTGAAAAATCTAGAATACATGGACCTCAGCCAGAATCTCCTGACAGACTTGACTATTCAACCAACACTGTATACAGGATCTGGCGCATATCAAAACCTCAACATGC
1:8302026-8304590_1116	TTGACTATTCAACCAACACTGTATACAGGATCTGGCGCATATCAAAACCTCAACATGCTCAATGTGAGTCAGAATGTTTTAAAATCTCTCGGGCTGATGTCTAGGTTGGTCACCAATCTT
1:8302026-8304590_1178	TGTGAGTCAGAATGTTTTAAAATCTCTCGGGCTGATGTCTAGGTTGGTCACCAATCTTAAAAAGCTCAAATATTTAGACTTAAGTTATAACAGTTTTGTTTCAATGCCAGAAAAGTGTAG
1:8302026-8304590_1240	AGCTCAAATATTTAGACTTAAGTTATAACAGTTTTGTTTCAATGCCAGAAAAGTGTAGCTGGCCTGTTACTCTGAGGTTTCTGAACCTTTCAAGCACAAAGTTAAGCACATTGACTCCTT
1:8302026-8304590_1302	CCTGTTACTCTGAGGTTTCTGAACCTTTCAAGCACAAAGTTAAGCACATTGACTCCTTGCTTGCCTTCGAGTTTGACAGTTCTGGATCTCAGCGAAAATGATCTTAAGGCGTTCAAGCAA
1:8302026-8304590_1364	GCCTTCGAGTTTGACAGTTCTGGATCTCAGCGAAAATGATCTTAAGGCGTTCAAGCAAAGATTTCCTCATCTCACTACACTTATACTGACAGGCAATCGCTTAATGAAACTGCCAGATGG
1:8302026-8304590_1426	TTCCTCATCTCACTACACTTATACTGACAGGCAATCGCTTAATGAAACTGCCAGATGGGAAATTATTCCCAAGCCTAAATACATTGCTGATACAAAGGAACGCCTTACGGATGTTCAACC
1:8302026-8304590_1488	TTATTCCCAAGCCTAAATACATTGCTGATACAAAGGAACGCCTTACGGATGTTCAACCAAAGCTCTTTGAGGAGTTTTAAAACTCTGCTTTACTTGGAGGCAGGTGCCAACAATTTTGTG
1:8302026-8304590_1550	CTCTTTGAGGAGTTTTAAAACTCTGCTTTACTTGGAGGCAGGTGCCAACAATTTTGTGTGCTCCTGCAAGTTTGTTTCTTTCTTTAAAAAGGACGTTGAGGATTTGATCACCCTACAGGA
1:8302026-8304590_1612	CCTGCAAGTTTGTTTCTTTCTTTAAAAAGGACGTTGAGGATTTGATCACCCTACAGGATGGCCGTCAAAATTACGTATGTAATACTCCCTTCACTCTCAGAGGTAATGCGATTGACAGTG
1:8302026-8304590_1674	CGTCAAAATTACGTATGTAATACTCCCTTCACTCTCAGAGGTAATGCGATTGACAGTGTCAGACTGTCTGTGTTTGAGTGTTATATGATCCCTGCCGTCTCAGTGCTTTGTTTTGGGATT
1:8302026-8304590_1736	ACTGTCTGTGTTTGAGTGTTATATGATCCCTGCCGTCTCAGTGCTTTGTTTTGGGATTATCACAGCACTCGGTCTTGTTGTGTTAACCTGCCACAAGCTTCACGTCATATGGTACCTGCA
1:8302026-8304590_1798	CAGCACTCGGTCTTGTTGTGTTAACCTGCCACAAGCTTCACGTCATATGGTACCTGCAGATGACTAAAGCATGGATACAAGCCAAACGGAAACCTGCTGTCGGTCGATTACCTGAAGAGC
1:8302026-8304590_1860	ACTAAAGCATGGATACAAGCCAAACGGAAACCTGCTGTCGGTCGATTACCTGAAGAGCTCCGCTATGATGCTTTTGTGTCTTACAGCCAACATGACGCTGAATGGGTCGAGGAGATTCTT
1:8302026-8304590_1922	CTATGATGCTTTTGTGTCTTACAGCCAACATGACGCTGAATGGGTCGAGGAGATTCTTGTTGCTGAGCTTGAAGACACTCAGCCTTCGTTTTCCCTGTGTTTGCACAAACGGGACTTCAG
1:8302026-8304590_1984	CTGAGCTTGAAGACACTCAGCCTTCGTTTTCCCTGTGTTTGCACAAACGGGACTTCAGACCGGGCCGCTGGATCGTGGACAACATCATTGACTCAATTGAAAAGAGCTATCGAACTCTTT
1:8302026-8304590_2046	GGCCGCTGGATCGTGGACAACATCATTGACTCAATTGAAAAGAGCTATCGAACTCTTTTTGTTCTGTCGGAGCACTTTGTGAGCAGTGAATGGTGCCGTTACGAGCTGGACTTCTCACAT
1:8302026-8304590_2108	TCTGTCGGAGCACTTTGTGAGCAGTGAATGGTGCCGTTACGAGCTGGACTTCTCACATTTCCGCATCATGGATGAACACAATGACTCCGCTGTCCTGGTGCTTCTGGAACCAATAAAGAA
1:8302026-8304590_2170	GCATCATGGATGAACACAATGACTCCGCTGTCCTGGTGCTTCTGGAACCAATAAAGAAGGAGACGATTCCCAAACGCTTCTGCAAGCTGAGAAAGATTATGAACTCCAGGACGTATCTGG
1:8302026-8304590_2232	ACGATTCCCAAACGCTTCTGCAAGCTGAGAAAGATTATGAACTCCAGGACGTATCTGGAGTGGCCTGAGGATGAGGACAAGAGAGATGAGTTTTGGAGCAATCTGAGAGCCGCTTTACAG
1:8302026-8304590_2294	GCCTGAGGATGAGGACAAGAGAGATGAGTTTTGGAGCAATCTGAGAGCCGCTTTACAGAGAGACGAGTGTTAAGCTGTTGTGGAAAGATGGCCGGTGTCCTGACATTTTATTCTACCCAT
1:17200000-17200250_0	TGATATCTACTGTAGGACTACGTGATAGCTCCGCCTCTCTGTTTGTTTCACTTCTTAAGAAAGAGGAATTGTTCCTTTTGTAAAGGTTATTTTCTCCTAACACGTGAAGTTTATTTGGTT
1:17200000-17200250_65	GAATTGTTCCTTTTGTAAAGGTTATTTTCTCCTAACACGTGAAGTTTATTTGGTTTCAAAAAAGAGGTCTGAGTTGCCATACCATATTGAACCACAACCAGACATCTGAGCTGAACCTGG
1:17200000-17200250_130	GGTCTGAGTTGCCATACCATATTGAACCACAACCAGACATCTGAGCTGAACCTGGGAAAGTAGATCGTCACCTATCAAGTAAGTCAGTGATAAACGATAGCATGCTGCATTAGCCTATTG
1:17201147-17201627_0	TTGACTTAGAGGGGAAAAAACTTTGAAAGGAAGGAAAATATGGATCTAATGAAACTCATATTATTGCCCTTGTTCTACGCTTGTTTTAGTGCCCACTGTGCAGGCACTACAAATGCACGC
1:17201147-17201627_60	TTATTGCCCTTGTTCTACGCTTGTTTTAGTGCCCACTGTGCAGGCACTACAAATGCACGCAAGTCAGCTTGCATGATTAAGAATGCCAAAGCAGACTGTAGTCATATGAATCTGGATGCA
1:17201147-17201627_120	AAGTCAGCTTGCATGATTAAGAATGCCAAAGCAGACTGTAGTCATATGAATCTGGATGCAATTCCAACGGACTTACCTACAAATATTACCACACTGGATGTATCTCACAACAGACTTAAA
1:17201147-17201627_180	ATTCCAACGGACTTACCTACAAATATTACCACACTGGATGTATCTCACAACAGACTTAAAACTCTGTCTTCTCTACACATGTACACAAATCTGGTGAATATAGATGCGAGCTACAACTCT
1:17201147-17201627_240	ACTCTGTCTTCTCTACACATGTACACAAATCTGGTGAATATAGATGCGAGCTACAACTCTTTAGCTGGCATAGAAAAGGATCTCTGTCTTTCTCTGCCGCACCTGCAATTTCTTAATGTG
1:17201147-17201627_300	TTAGCTGGCATAGAAAAGGATCTCTGTCTTTCTCTGCCGCACCTGCAATTTCTTAATGTGCAACACAATCAAGTGTATTTGATAAGCGAAAAAAACCTGAAAAACTGTTTTCATTTGACA
1:17201147-17201627_360	CAACACAATCAAGTGTATTTGATAAGCGAAAAAAACCTGAAAAACTGTTTTCATTTGACACAACTTGACCTGTCTGACAATAAGCTGAAGCTACAAGGGGAGCCATTCTCTCTCTTAAAG
1:17202050-17202300_0	CTTCATAGAATTTAACATGGTTGGATGTATCTCGAAACAAACTGACATCTGCTAAACTGGGAACAGAACCTCAGCTGCCAAACCTGGTGACCCTGGTTCTCTCTGGAAATAACATTAACA
1:17202050-17202300_65	GAACCTCAGCTGCCAAACCTGGTGACCCTGGTTCTCTCTGGAAATAACATTAACATACTGCAAAAGAATGACTTCTCATTTCTCAGTAATTCTTCTTCATTTCGGGTTCTGATTCTCTCA
1:17202050-17202300_130	GAATGACTTCTCATTTCTCAGTAATTCTTCTTCATTTCGGGTTCTGATTCTCTCATCTCTGATTCTTAAAAAGGTAAGAGGAACCGAATGTGTCACGTCAAGCTGCTTTCACTGATTTCA
1:17202756-17204602_0	TGGAGAATGGGTGTTTCAAGGCTATCGATACACTGTCTGACTTGGTGTTGGATAGCAGCAAGCTCACCTCTCAGTTTACCACCAGTCTTTTTGAAGAACTTGCTGACACAGCCTTGCGAA
1:17202756-17204602_62	CTCACCTCTCAGTTTACCACCAGTCTTTTTGAAGAACTTGCTGACACAGCCTTGCGAAACCTTTCTCTTAAGAGCACTGAACAGGTGACACTGTCAAACACAACTTTCCAAGGTCTAGAG
1:17202756-17204602_124	TTCTCTTAAGAGCACTGAACAGGTGACACTGTCAAACACAACTTTCCAAGGTCTAGAGAAGACCAAGATCAAAGTTCTGGACCTTAGTGAAAACAGAATTTCAAAGATTGTAGATGGTGC
1:17202756-17204602_186	CCAAGATCAAAGTTCTGGACCTTAGTGAAAACAGAATTTCAAAGATTGTAGATGGTGCCTTTCAGTGGTTGCCCCAACTGGAATTTTTGTCTCTGGAGCATAACACAATTAGACACCTAA
1:17202756-17204602_248	CAGTGGTTGCCCCAACTGGAATTTTTGTCTCTGGAGCATAACACAATTAGACACCTAACTAATGACTCATTCAGTGGACTAGGAAACCTAAGGCAGCTCAACCTGCGGAAAGCCCTAATT
1:17202756-17204602_310	TGACTCATTCAGTGGACTAGGAAACCTAAGGCAGCTCAACCTGCGGAAAGCCCTAATTAAGAGTCATGCATCTTTACCTGTTATTGATGACTTTTCCTTCCAACATCTAGTCCAGTTGGA
1:17202756-17204602_372	GTCATGCATCTTTACCTGTTATTGATGACTTTTCCTTCCAACATCTAGTCCAGTTGGAATATTTGTGTATGGCAAATACTGCCTTCCGAGAGTTAACTGAACAAATCTTTTTTGGCCTTC
1:17202756-17204602_434	TTGTGTATGGCAAATACTGCCTTCCGAGAGTTAACTGAACAAATCTTTTTTGGCCTTCGGAACCTGAAGACATTGGATTTGAGTTGGAGCATCACAGGGATAAAGACAGTCACAAATAAA
1:17202756-17204602_496	CCTGAAGACATTGGATTTGAGTTGGAGCATCACAGGGATAAAGACAGTCACAAATAAAACCTTTGCTGGTCTGCAAGAATCTCCACTCCTTCAGACTCTTAATCTTACAGGCATGGGCAT
1:17202756-17204602_558	TTGCTGGTCTGCAAGAATCTCCACTCCTTCAGACTCTTAATCTTACAGGCATGGGCATCAACAAGTTGGAGCCTGGTGCCTTCTCAAGTTTAGGAAATCTCAGCAACCTACTAATGAGTC
1:17202756-17204602_620	AAGTTGGAGCCTGGTGCCTTCTCAAGTTTAGGAAATCTCAGCAACCTACTAATGAGTCGCAATTTTATCAATCAGCAGTTACAAGGGAATGAGTTCAAGGGCCTCTCTAACATTAAAGAG
1:17202756-17204602_682	TTTTATCAATCAGCAGTTACAAGGGAATGAGTTCAAGGGCCTCTCTAACATTAAAGAGATTGACATGTCTATAAACCAGCAAAGTATTTCCCTCACCAATGCATCATTCGTTCATGTCTC
1:17202756-17204602_744	ACATGTCTATAAACCAGCAAAGTATTTCCCTCACCAATGCATCATTCGTTCATGTCTCTACATTGAGGACCCTAAAGCTAGGTCGTGCTTTAAAAGGGACTCTAGATATGGAACCATCTC
1:17202756-17204602_806	TTGAGGACCCTAAAGCTAGGTCGTGCTTTAAAAGGGACTCTAGATATGGAACCATCTCCTTTCAGGCCACTTGTCAACCTCACAATCCTAGATCTCAGTAATAATAATATTGCAAACATA
1:17202756-17204602_868	CAGGCCACTTGTCAACCTCACAATCCTAGATCTCAGTAATAATAATATTGCAAACATAAATGCTGACTTGTTGGAAGGTCTGTATAATCTAAAAGTGGTGAAAATGCAGCACAACAACTT
1:17202756-17204602_930	CTGACTTGTTGGAAGGTCTGTATAATCTAAAAGTGGTGAAAATGCAGCACAACAACTTAGCTAGATTGTGGAAAATGGCAAACCCTGGTGGTCCGGTGCTGTTTCTGAAGGATGCTACAA
1:17202756-17204602_992	AGATTGTGGAAAATGGCAAACCCTGGTGGTCCGGTGCTGTTTCTGAAGGATGCTACAAATCTGTCGTATCTGAATCTGGATTACAATGGCATCGATGAGATTCCACCTAATGCTTTTCGT
1:17202756-17204602_1054	GTCGTATCTGAATCTGGATTACAATGGCATCGATGAGATTCCACCTAATGCTTTTCGTGGCTTCTCTGAGTTGCATGAACTAAGTCTTCGTGGCAATCTCTTGGATCAGTTGCATGCCTC
1:17202756-17204602_1116	TCTCTGAGTTGCATGAACTAAGTCTTCGTGGCAATCTCTTGGATCAGTTGCATGCCTCTGTTTTTGATGACCTAAACTCTTTAAAATATTTGCATCTTCAAAAGAACCTTATAACATCTG
1:17202756-17204602_1178	TTTGATGACCTAAACTCTTTAAAATATTTGCATCTTCAAAAGAACCTTATAACATCTGTCCAAAGGGCTACGTTTGGTGTGCCACTGTCCAAACTGAAAGAACTTAACATGGACCACAAC
1:17202756-17204602_1240	AAGGGCTACGTTTGGTGTGCCACTGTCCAAACTGAAAGAACTTAACATGGACCACAACCCATTTGACTGCACCTGTGAGAGCATCCTGTGGTTCTCTGAATGGCTGAACTCCACCAACAC
1:17202756-17204602_1302	TTGACTGCACCTGTGAGAGCATCCTGTGGTTCTCTGAATGGCTGAACTCCACCAACACCAGCGTTCCAGGATTTCCTCAAAGTTATATCTGCAATACCCCCAATGCCTACTTTAATCACT
1:17202756-17204602_1364	GTTCCAGGATTTCCTCAAAGTTATATCTGCAATACCCCCAATGCCTACTTTAATCACTCTGTAATGAACTTTGATCCTTTGTCCTGCAAGGACATGACACCTTTTAAGGCGCTGTACATT
1:17202756-17204602_1426	AATGAACTTTGATCCTTTGTCCTGCAAGGACATGACACCTTTTAAGGCGCTGTACATTTTGAGTAGTACGGCAGTGTTAATGTTGTTGTTTATATCCTTCCTGGTACACTTCCAGGGATG
1:17202756-17204602_1488	GTAGTACGGCAGTGTTAATGTTGTTGTTTATATCCTTCCTGGTACACTTCCAGGGATGGAGAATTCAGTTCTACTGGAATATAATGGTAAACCGTATGTTAGGGTCGCTGAAGGATGCAA
1:17202756-17204602_1550	ATTCAGTTCTACTGGAATATAATGGTAAACCGTATGTTAGGGTCGCTGAAGGATGCAAAAGTTACTGAAGGTAGATTTCAATTTGATGCCTATATCATCCACGCAGGTGAAGATAAATCA
1:17202756-17204602_1612	TACTGAAGGTAGATTTCAATTTGATGCCTATATCATCCACGCAGGTGAAGATAAATCATGGGTGGAACGAAGCTTGCTCTCTCTGGAGGACAAAGATTTAAATTTTTTCTATGAACAGAG
1:17202756-17204602_1674	TGGAACGAAGCTTGCTCTCTCTGGAGGACAAAGATTTAAATTTTTTCTATGAACAGAGAGATTCTACACCTGGACATTCTCGTCTTGAGACAATTGTTGATAACATGGTATACTCCAGGA
1:17202756-17204602_1726	ACAGAGAGATTCTACACCTGGACATTCTCGTCTTGAGACAATTGTTGATAACATGGTATACTCCAGGAAGATCATTTTTGTTATAACAGAAATGCTACTAAAGGATCCATGGTGTAGGCA
1:17204855-17205290_0	TTCAAAGCCCATCATGCTCTTCATCATGTAATGGAGGATAACCGCGACTCACTGATCCTGATTTTCTTGGAAGATGTAACTGATTACAACCTGAATCGCTCTCTTCATCTTCGTCGTGGC
1:17204855-17205290_63	TTCTTGGAAGATGTAACTGATTACAACCTGAATCGCTCTCTTCATCTTCGTCGTGGCATGTTGAAGCCTAAATGTGTCCTCTACTGGCCTTTACACAAGGAACGCATCCCAGCATTTCAT
1:17204855-17205290_126	AAGCCTAAATGTGTCCTCTACTGGCCTTTACACAAGGAACGCATCCCAGCATTTCATCAGAAACTCCGCTCAGCATTAGCCTCTACAAACAAGGTCAACTAGAATTTTTTTCAATAAGTA
1:17204855-17205290_189	CTCCGCTCAGCATTAGCCTCTACAAACAAGGTCAACTAGAATTTTTTTCAATAAGTAGTGCTGTACATTTTTTGCTTTTAAACTGTCAAATTAATCGAATCGCTCCCATGATACTGAAAG
1:17204855-17205290_252	TACATTTTTTGCTTTTAAACTGTCAAATTAATCGAATCGCTCCCATGATACTGAAAGTTTCACTACTTTATTTTCTTTTGTGGTCACAATTGCATAATCTCATTGGAAATCCAAACAAGA
1:17204855-17205290_315	TACTTTATTTTCTTTTGTGGTCACAATTGCATAATCTCATTGGAAATCCAAACAAGACACTTATGCAGACAAAAGCCAACTGCCCTGGGTATAGCGTAGTTCACAAAAAAAAAAAAAAAA
1:44374572-44375110_0	GGACGTGACCCTAGACAAAGACTCGGCTCACCCCCGTCTGGTCATCTCGGAGGATGGGAAGCAGGTGCTGTGCAGTGACCGATACCAGAATGTGCCAGACACACTCGAGCGATTCGACCG
1:44374572-44375110_60	GCAGGTGCTGTGCAGTGACCGATACCAGAATGTGCCAGACACACTCGAGCGATTCGACCGTGTGGTGTGTGTTCTGGGCCGCCAAGGTATCAACTCCGGCTGCCATTACTGGGAGGTCCT
1:44374572-44375110_120	TGTGGTGTGTGTTCTGGGCCGCCAAGGTATCAACTCCGGCTGCCATTACTGGGAGGTCCTGGTGAGTGACAAGACGGACTGGGATTTGGGCATTGCTGCTCGCACCATCAACAGGAAAGG
1:44374572-44375110_180	GGTGAGTGACAAGACGGACTGGGATTTGGGCATTGCTGCTCGCACCATCAACAGGAAAGGCAAAATAGCCGCCAACCCTGCTAATGGATTCTGGTTCTTAAGTCTACGTGACAAGCAAGA
1:44374572-44375110_240	CAAAATAGCCGCCAACCCTGCTAATGGATTCTGGTTCTTAAGTCTACGTGACAAGCAAGATTATGTCTTCCGCACAGAGCCATCGACACCTATAATCGTAAATCCAAAACCGCAGCGGAT
1:44374572-44375110_300	TTATGTCTTCCGCACAGAGCCATCGACACCTATAATCGTAAATCCAAAACCGCAGCGGATCACTGTCAGTGTGGACTATGAGAGAGGCCAGTTGTCTTTTTATAATGCAGATACAAAGAC
1:44374572-44375110_360	CACTGTCAGTGTGGACTATGAGAGAGGCCAGTTGTCTTTTTATAATGCAGATACAAAGACGTTGATATTTACTTACACAGACTCCTTTTCAGAGACTCTATATCCTTTCTTTAGCCCGTG
1:44374572-44375110_418	ACGTTGATATTTACTTACACAGACTCCTTTTCAGAGACTCTATATCCTTTCTTTAGCCCGTGCACCAACAAATCTGGCAAAAACGAAGCACCACTTATTATTTGTCCTCCTTTTGTGGCT
1:46424889-46425823_0	GTGTGAATATAACACCAACTTTATTTCAATAAACCATATTAAGACAAATGATTGTACAGATTAACAGACTTAAACAGAAACACCAAAAATAATATGTACATGAGGACAGTCCTAACAGTA
1:46424889-46425823_63	ACAGACTTAAACAGAAACACCAAAAATAATATGTACATGAGGACAGTCCTAACAGTACAAACAGTGGTATTCATCAGTTTTTGTAAAGGCACTATAAATAAATATCATCTAAATATTAAT
1:46424889-46425823_126	GTGGTATTCATCAGTTTTTGTAAAGGCACTATAAATAAATATCATCTAAATATTAATTATAACACTGATGCATCTTATTATGAAGAAATATTCATTCGGGCAGGCACTTTTCAGTTTTTG
1:46424889-46425823_252	CGAATAGAAATTTAAGTAGCCTAAATAGAAAATACATTATTTATTAAATAAATGAAAACAAAAACATATTTACTTCATAAAAATTTTGCAGCTATAAAAGACATTATTTATATATATATA
1:46424889-46425823_693	TCAATAAAATGTAAAAGCAAGCTGTGCATGTTATTTTTTAAAACAATACGCCCAAATCTTGGTCCACTTAAAAAAAAAAAATTATAATTGTAAACTGTGACAAATTTGCAGCAGGACATT
1:46424889-46425823_756	CCACTTAAAAAAAAAAAATTATAATTGTAAACTGTGACAAATTTGCAGCAGGACATTTAATGAAGCAAGCAACTTGATTTTAGTGCAATAATAAGAAAGCATGTACTTATTTAAAATTGA
1:46424889-46425823_814	AATGAAGCAAGCAACTTGATTTTAGTGCAATAATAAGAAAGCATGTACTTATTTAAAATTGAATTTAAAAAAAATGGTCCGCTGAACCAGGTAGCAAAGAGTGTTTCTCCTCCTTGTTTC
1:46428801-46429665_0	ATTCTTGTATTTGCTAGAAAATAAACTGCTCCACCAATGACTGCCAGCACTAACAAAACTCCGATTAATGCTCCAAAAATCGTACCTATGGGAGTTCCTGAAGAGCAGTCCTGGCACTCC
1:46428801-46429665_62	GATTAATGCTCCAAAAATCGTACCTATGGGAGTTCCTGAAGAGCAGTCCTGGCACTCCCCATCTACAAATACAAAAGACATGCATCTTCAATTTTAATCAACAATTTTAATTTACTTTTA
1:46428801-46429665_124	CTACAAATACAAAAGACATGCATCTTCAATTTTAATCAACAATTTTAATTTACTTTTACAAGGTGCTTTTTCTGTATGCTTTGATTACCCCATTTTTTGATAATTGGTTCCTTGAGGGTT
1:46428801-46429665_186	GTGCTTTTTCTGTATGCTTTGATTACCCCATTTTTTGATAATTGGTTCCTTGAGGGTTCTGTGGGCCACATAACAGTCATATTCTGCTTTTTCATAGATGTTAGTGCTCTTTCTCAGCTG
1:46428801-46429665_248	GGGCCACATAACAGTCATATTCTGCTTTTTCATAGATGTTAGTGCTCTTTCTCAGCTGAAAGGTCCCATCAGGGTTTGGTCTAACTCCTGAAGATTCTACCTCATTATCAGACAGTGCCG
1:46428801-46429665_310	GTCCCATCAGGGTTTGGTCTAACTCCTGAAGATTCTACCTCATTATCAGACAGTGCCGTGCGGTATTTCCTTATGGTCAAAATCACATCTTTGGGGTAGAATCCAGTGACCATACAGGTA
1:46428801-46429665_372	GTATTTCCTTATGGTCAAAATCACATCTTTGGGGTAGAATCCAGTGACCATACAGGTAAGTTTTAGCTTGGCTTTGCCACTGATAATCTTCTTCGCAAACACATGAACATCTGGGGGAGC
1:46428801-46429665_434	TTAGCTTGGCTTTGCCACTGATAATCTTCTTCGCAAACACATGAACATCTGGGGGAGCTGAAATCACAAGTACATTGTTTAATCAATCAGTTTTATAACAATAACCAAATTAATGCTGTA
1:46428801-46429665_496	ATCACAAGTACATTGTTTAATCAATCAGTTTTATAACAATAACCAAATTAATGCTGTACTGTATATAAACTCACAGCCTTCTCTAAGCTCCTGATCTCCATATTCTCTGAATTTGTTGAG
1:46428801-46429665_682	TTTCCTCTTGGTTGGAAGAGCTTCTTCCACTGGAGCAACCCACTGAGAATCCGCATCATCAAAGGCCAGGAAGTTTCTTCCATCATAGCTGTACTCATCAATGCCTTTAGAAAATCGGAC
1:46428801-46429665_744	AGGCCAGGAAGTTTCTTCCATCATAGCTGTACTCATCAATGCCTTTAGAAAATCGGACATCATTGCCCTGACTGTCAATTTCACAACCATGTCTCCACTGAAGAACATGAACATCTGAAA
1:46429967-46430254_0	TGAATTATTATTGTGTCTCATTCGTTCCATCAGAATTTTGAGATTCACATTAAACCACTGTTCTTTGCTCTTTCTGGACTGGGTGCCTTTTTCCCAGTAATCTTCCTGCATTTTCTCTTT
1:46429967-46430254_56	ACTGTTCTTTGCTCTTTCTGGACTGGGTGCCTTTTTCCCAGTAATCTTCCTGCATTTTCTCTTTCATCCAGTGCTGTTTGGGAATCTTCTTCTGCTCTTGGCTGTTGTAATAGTCAATCT
1:46430650-46430900_0	GAGTAATAAGCAACTTGAGAAACAACAATGACGTGGATTAATTTTTTCTTTAAGTATTTAAGAATTATCCTAAATAGGCCACCTAAGAGTAGCTAATTTTGAGTCAAAATAACAGAAAAC
1:46430650-46430900_65	TATCCTAAATAGGCCACCTAAGAGTAGCTAATTTTGAGTCAAAATAACAGAAAACTCACCGGTCCAGGCTGGTACAACAGTAAAGAGCATCACTACCGAAAACAGAGCGGCAAAAACAGC
1:46430650-46430900_130	AGGCTGGTACAACAGTAAAGAGCATCACTACCGAAAACAGAGCGGCAAAAACAGCCATTTTGCAGCCTTTTGAGGTCGCGGCACATGTATTTGGTCTATTTCCCCTTCCAGTACCGTATG
1:46449556-46450550_0	CTTTTTTAAAACCACTTTATTGTGAAGAAAGTGCAAAATTCACAAGATGCTCAGATTTTAAACAAAGCCAAAACTATATATTAAGGTAAAGTTTGTTTTATATTTACGCATTCGTTCAGT
1:46449556-46450550_315	GAATGTCTGAATATAAAAACCAACTTTACCTTTTTTGTAAAAGCACTACAAATGACAGCTATAGAATACACCACATGTATGCTATAACTTTAATAAGGAACAGAATAACTTAATAACAAG
1:46449556-46450550_378	GAATACACCACATGTATGCTATAACTTTAATAAGGAACAGAATAACTTAATAACAAGAAAATATCCTTAACACTGATGCATCTTATTATGAAGAAATAATACAAGATCACTCATAATTAT
1:46449556-46450550_441	TCCTTAACACTGATGCATCTTATTATGAAGAAATAATACAAGATCACTCATAATTATTTATATAAAAGCTGAAAATTAAATCTAAATTAAGCAACTAATATAAAACAACCCTTTTAGAGT
1:46449556-46450550_504	AAAAGCTGAAAATTAAATCTAAATTAAGCAACTAATATAAAACAACCCTTTTAGAGTGAAAAACTGAAGAAAACATTTTCAATTTTTTATAGAGCATTGAGGATCATTTTATGATACATT
1:46449556-46450550_567	CTGAAGAAAACATTTTCAATTTTTTATAGAGCATTGAGGATCATTTTATGATACATTCAGCAAATAAGCTCTGGGTTTTTTGGTGCTAAAAATGTGCACATATTTTTTAAATCGGCATTG
1:46449556-46450550_630	ATAAGCTCTGGGTTTTTTGGTGCTAAAAATGTGCACATATTTTTTAAATCGGCATTGAAAATTATCAAGGGAAAAACAAGAAAGAAAAAAAACACTCAACTTCATCTTTTAGATGTAGAA
1:46449556-46450550_693	ATCAAGGGAAAAACAAGAAAGAAAAAAAACACTCAACTTCATCTTTTAGATGTAGAAATAATAAGTCAAAACATCTGTAAAAAATATATAATGAACAAAACTAGATTTTAGGAGAAATTT
1:46449556-46450550_756	AGTCAAAACATCTGTAAAAAATATATAATGAACAAAACTAGATTTTAGGAGAAATTTTAAGAAAAACAAAAGGCAGGGCTATCTATGTTGACCATCTGATGATCCGACTTTGTTTAACTC
1:46449556-46450550_819	AAACAAAAGGCAGGGCTATCTATGTTGACCATCTGATGATCCGACTTTGTTTAACTCTTCAGTTCTCTCTCAGTAGACTTTTTTCTCTTCATCTAACAGGAATTTTCAACTTCCAGTGTT
1:46449556-46450550_874	TCTTCAGTTCTCTCTCAGTAGACTTTTTTCTCTTCATCTAACAGGAATTTTCAACTTCCAGTGTTTCCATCAGTAGAGATTGTCCTTCCGCAGCTGGTGGTTTATTTTTGCACTCCCTCA
1:46451648-46451968_0	ACATTGTCCATGTTTTCCTGGGAGCGAGGACTGCTTTCTGAACTTCAAGCACTACTCCCTCTACCTGTTGAGGTACAGTGAAATGTCAAAGTGAGCTGTGCTTGTCATATTTTTAAAACA
1:46451648-46451968_50	ACTACTCCCTCTACCTGTTGAGGTACAGTGAAATGTCAAAGTGAGCTGTGCTTGTCATATTTTTAAAACAATGTGCCAAAACTTTGTCCAGCAAAGGAAAAAGTGGAATTGTAACCTGTG
1:46451648-46451968_100	CTTGTCATATTTTTAAAACAATGTGCCAAAACTTTGTCCAGCAAAGGAAAAAGTGGAATTGTAACCTGTGAAAGTCATGCAGTAGAAGATGATGCATTTAATCAATCAATTTAATTTTGC
1:46451648-46451968_150	AAGTGGAATTGTAACCTGTGAAAGTCATGCAGTAGAAGATGATGCATTTAATCAATCAATTTAATTTTGCAATAATAAGAAAAGCATGTGACAATCTATAATTGAATGAAAAGAATATTC
1:46451648-46451968_200	ATCAATCAATTTAATTTTGCAATAATAAGAAAAGCATGTGACAATCTATAATTGAATGAAAAGAATATTCACCATAGTTGGCCGAACCATTTGGCATAGAGCGTTTCTCATCCTTATTTC
1:46452450-46452700_0	ATAATAATAATGATAATAATAATAATAATAATAATAATCTTCACAATAACCTAATGTTTCACCATTTTAAACTCAACTTGCTTATTGTTAACAAAAAGGAACAAGAAGGATATTCACCAG
1:46452450-46452700_65	TTTAAACTCAACTTGCTTATTGTTAACAAAAAGGAACAAGAAGGATATTCACCAGAAACAGTTTATACGACAAAGCGTTTCTCATCCTTATTTCCTGTAACATGCAGATATTCAAGTCAC
1:46452450-46452700_130	TACGACAAAGCGTTTCTCATCCTTATTTCCTGTAACATGCAGATATTCAAGTCACCATCAAGAAATAAAAGACAATCACAGTTAAATATTGTATTGCTACACTTTTCAACACAGCCTGGA
1:46452932-46453800_0	AATTATGTTCTTCTTTTTTAAGATCCAAACTGTTACACCAATGGCTACCAGCAGAATCAAAACTCCAATTATTGCTGCAATGATGGCTATGGGAGGCTCTGAAAGGTATTCACCATCTAC
1:46452932-46453800_63	TCCAATTATTGCTGCAATGATGGCTATGGGAGGCTCTGAAAGGTATTCACCATCTACACAAAGGCAAAGACAAGTATTTTACATTTGAATCAATTATTTCAATTTAGTTTTGACAAAAGA
1:46452932-46453800_126	GCAAAGACAAGTATTTTACATTTGAATCAATTATTTCAATTTAGTTTTGACAAAAGAAAGTGGAGGTTCACAAGTGGTATTTCTGTATGCTTTGATTACTCCATCTGACGATAATTGGTT
1:46452932-46453800_189	AGGTTCACAAGTGGTATTTCTGTATGCTTTGATTACTCCATCTGACGATAATTGGTTCCTTGAGGGTTCTGTGGTTCACATAACAGTCATATTCTGCTTTTTCATCCTCATAGATGTTAG
1:46452932-46453800_252	GGGTTCTGTGGTTCACATAACAGTCATATTCTGCTTTTTCATCCTCATAGATGTTAGTGCTCTTTCTCAGCTGAAAGGTCCCATCCTGGTTTGGTCTAACTCCTGAGGAATCTAGATCAT
1:46452932-46453800_315	TTCTCAGCTGAAAGGTCCCATCCTGGTTTGGTCTAACTCCTGAGGAATCTAGATCATTATCAGGCAGTGTCGTGCGGTATTTCCTTATAGTCAAAATCATATCTTTGGGGTAGAATCCAG
1:46452932-46453800_378	GCAGTGTCGTGCGGTATTTCCTTATAGTCAAAATCATATCTTTGGGGTAGAATCCAGTGGCCATACAGGTAAGTTTTAGCTTGATTTTGCCACTGATAATCCTTCTTGCAAACACATAAA
1:46452932-46453800_441	TACAGGTAAGTTTTAGCTTGATTTTGCCACTGATAATCCTTCTTGCAAACACATAAACATCTGGGGGAGCTGAAATCACAAGTATATTGTTTAATCAGTCAGTTCTATAACACTAACCAA
1:46452932-46453800_504	GGGGAGCTGAAATCACAAGTATATTGTTTAATCAGTCAGTTCTATAACACTAACCAAATGCTGTATGTTTACTCACAGCCGTCTCTAAGCTCCTGATCTCCGTATTCTCTGAATTTGTTG
1:46452932-46453800_567	TATGTTTACTCACAGCCGTCTCTAAGCTCCTGATCTCCGTATTCTCTGAATTTGTTGAGCCAGTCCACACACTCTTTTTCCAGGTAGCCCTTGGTGTACTGATTTAGGATGGGCACATTA
1:46452932-46453800_693	TTCCTCTTGGTTGGAAGAGCTGCGTCCACTGGGGCAACCCACTGAGACTCCGCATCATCAAAAGAAAGGAAGTTTCTTCCATCATAGCTGTACTCATCAATGCCTTTAGAAAAGCGGTGT
1:46452932-46453800_748	CATCAAAAGAAAGGAAGTTTCTTCCATCATAGCTGTACTCATCAATGCCTTTAGAAAAGCGGTGTTCATTCCCCTGAATCTCAATTTCACAACCATGTCTCCACTGAAGAACATGAAGAT
1:46454299-46454571_102	CTGCATTTTCTCTTTCATCCAGTGCTGTTTAGGAATCTTCTTCTGATCTATGTTATTGTAATAGTCAATCTGTCTGTCATCAAGCAAACCCATTGCAGTGAATTGATAGATGCCCGACTG
1:46454299-46454571_152	TGTTATTGTAATAGTCAATCTGTCTGTCATCAAGCAAACCCATTGCAGTGAATTGATAGATGCCCGACTGGTCGACAGGTCTGGATAAAGCTGTGTATATGTAGTAGAGGGAGTGTTTTT
1:46460400-46460650_0	CATAAAAAGGCTATTTTTGAGTGAAAATAACAGCAGACTCACCGGTCCGGACTGATACAACAGAAAGGAGCATCACAGCCGAAAACAAAACGGCCAAAACAGCCATTCTGAAGCCTTTTG
1:46460400-46460650_65	AGGAGCATCACAGCCGAAAACAAAACGGCCAAAACAGCCATTCTGAAGCCTTTTGAGGCCGCAGCGTGTGTCTGTTTTCACCCTCACTGACGTACAGCAAGCTGTTAAAGAATTTAAACC
1:46460400-46460650_130	GTGTGTCTGTTTTCACCCTCACTGACGTACAGCAAGCTGTTAAAGAATTTAAACCGTGCTCAGTCTATAAATAAATATAAATATATCTCAGGCATCGGGTGGTAGCAACAGGGGGGTAGG
1:46464192-46465221_0	TTTTTTAAACCACTTTTATTGTTAATAAAAAAGAAAGTGCAAAATTCACGAGATGCTCAGTTTTTAACAAAGCCAGAAATATATATTGACTTAAAGTTGGTTTTATATTTACGCATTCGT
1:46464192-46465221_325	TGCCGACATAAAACCAACTTTACCTAAATAAAACATATTAGGACAAATTAGTGTACAGATTAACAGACTTAAACAGAAACAACAGAAATAATATGTACAGTCATAACAGTGAAAACAGTG
1:46464192-46465221_390	GACTTAAACAGAAACAACAGAAATAATATGTACAGTCATAACAGTGAAAACAGTGATATTTATCAGATATTGTAAAGGCACTTTAAATGACAGCAATACAATCAACCACTAACCACATTT
1:46464192-46465221_455	GATATTGTAAAGGCACTTTAAATGACAGCAATACAATCAACCACTAACCACATTTAGGAAATAGCTTAATTAAGGCCCCTAAGGAACAGCATGAAAATATCCATATAACACTGATGCATC
1:46464192-46465221_520	TTAATTAAGGCCCCTAAGGAACAGCATGAAAATATCCATATAACACTGATGCATCCTATATCATGAAGAAATATGAGATTACACATTATTTTATGTAAGCTGAGAATTAAATCTAAACTA
1:46464192-46465221_585	AAGAAATATGAGATTACACATTATTTTATGTAAGCTGAGAATTAAATCTAAACTAAGAAACTAAAATAAAACAATCACAACATCATTTTACAATTCAGTGAGAAACTGGTATAAAGGAAT
1:46464192-46465221_650	ATAAAACAATCACAACATCATTTTACAATTCAGTGAGAAACTGGTATAAAGGAATGCTTTCCTTTTTTAATGCATTGAGGATCTTTTTATGATACTTTTATCAAAAAGGCTCTGGGTAAT
1:46464192-46465221_715	TTTAATGCATTGAGGATCTTTTTATGATACTTTTATCAAAAAGGCTCTGGGTAATTTTTATTGGTGCCCATTTTTAAAACTGGTATTGAAAATTTGTCTACTTTCATCTTTTAGATGTAG
1:46464192-46465221_780	GCCCATTTTTAAAACTGGTATTGAAAATTTGTCTACTTTCATCTTTTAGATGTAGGAGTAAGGCAAAAAAGGTAAAAACACACATATATATATATAATGAACAATACCAAATTTTATGAA
1:46464192-46465221_845	AAAAAGGTAAAAACACACATATATATATATAATGAACAATACCAAATTTTATGAAAAGACATAATGTAAAAATGGGGCACGGTGTAAATCAGCTGTCATTCTGCAAATTTTCTAAGATAA
1:46464192-46465221_909	TGTAAAAATGGGGCACGGTGTAAATCAGCTGTCATTCTGCAAATTTTCTAAGATAATCCAACTTTACAGATCTCCACCAGTAGATTTTCCTTCTGCAGCTGTCGGATTTGGACTCCCTTA
1:46466342-46466666_0	ACAATGTCCATTTTTTCCTGTGAGTTAGTAGGACTGCTTTTTGAACTTCCATCACTACTCCCTTGACCTGTTGATGTAAAGTGAAATGTCAAAGTGAGCTGTGCATGTTTTTTTTTAAAA
1:46466342-46466666_51	TCACTACTCCCTTGACCTGTTGATGTAAAGTGAAATGTCAAAGTGAGCTGTGCATGTTTTTTTTTAAAACAGTGTGCCAAAACTTTGTCTAGCAAAAGAAATAAAAAAGGAAAGAAAGTG
1:46466342-46466666_102	GCATGTTTTTTTTTAAAACAGTGTGCCAAAACTTTGTCTAGCAAAAGAAATAAAAAAGGAAAGAAAGTGGAATCTTGCAGTACAGCAAGATGCATTTAATAAAGCAATTTGATTTTAGTT
1:46466342-46466666_153	AAAAAAGGAAAGAAAGTGGAATCTTGCAGTACAGCAAGATGCATTTAATAAAGCAATTTGATTTTAGTTCTGTAATAGAAGAAAGCATGTGCCAATCAATAACTGAATAAAAAGAATATT
1:46466342-46466666_204	AGCAATTTGATTTTAGTTCTGTAATAGAAGAAAGCATGTGCCAATCAATAACTGAATAAAAAGAATATTTACCAGAGTCGTCTGAACCAGGTAGCATAGAGCATTTCTCATCCTTGTTTC
1:46467058-46468403_0	AGAGATAGTTGGTACTGAAGAAGGTTTCACATTGTTATTTCCTGTAAAATGCAGATTTTCAAGTCATGCCATCAAGAAATAAAAGACAATCACAGGTGAATGCTGTACTGCTACTTTCTT
1:46467058-46468403_65	ATGCCATCAAGAAATAAAAGACAATCACAGGTGAATGCTGTACTGCTACTTTCTTAAACACACCCTGAGCATTTCACTTTAGTTGCACTTTGATTGAATATTAATTTTAACTTATAATTG
1:46467058-46468403_130	TGAGCATTTCACTTTAGTTGCACTTTGATTGAATATTAATTTTAACTTATAATTGATTGAAAATGTTGAAGTACATGAAAAAACTGTTTTTCTCCACCAGTTTTCACCATTTCTCAAAAG
1:46467058-46468403_195	TTGAAGTACATGAAAAAACTGTTTTTCTCCACCAGTTTTCACCATTTCTCAAAAGTGATCTAATTTCTCCTAAAACAATGAACCATCAAGACTGATTACATTTTGAGAATAAGATTGAAA
1:46467058-46468403_260	TCTCCTAAAACAATGAACCATCAAGACTGATTACATTTTGAGAATAAGATTGAAATCAATAACCAATCAATAAATAATGACATTATCATCATGAAAAAAACTTTTCCCTAAATAAATATT
1:46467058-46468403_325	ATCAATAAATAATGACATTATCATCATGAAAAAAACTTTTCCCTAAATAAATATTGTAAAAAATTAAAAAACATGAAATTGTTAATGATCATTTATCAGTCTATACGCACCGCTCCTCTT
1:46467058-46468403_390	AAAAAACATGAAATTGTTAATGATCATTTATCAGTCTATACGCACCGCTCCTCTTTCTTAGGAAATAAACTGCTCCACCAATGGCTGCCAGCACAACCAAAACTACAATTATTGCTCCAG
1:46467058-46468403_455	TAAACTGCTCCACCAATGGCTGCCAGCACAACCAAAACTACAATTATTGCTCCAGCAATAATACCTATGGGAGATCCTGACTCAGGGCCATCCAGGCACTCCCCATCTACACAAATACAA
1:46467058-46468403_520	TATGGGAGATCCTGACTCAGGGCCATCCAGGCACTCCCCATCTACACAAATACAAAGATATGTATTTACAATTTTAATCAAACTAAAAAAAAAAGAAACAAATAGTTTTGGCAAAAAATG
1:46467058-46468403_585	TTACAATTTTAATCAAACTAAAAAAAAAAGAAACAAATAGTTTTGGCAAAAAATGGAGGTTCACAGCTTTTGTGATGCTTTTTGAATATAAGGTGCTTTTTCTGTATGTTTCATTACCCC
1:46467058-46468403_650	GCTTTTGTGATGCTTTTTGAATATAAGGTGCTTTTTCTGTATGTTTCATTACCCCATTTTTTGATAATTGGTTCCTTGAGGGTTGTGTGGGACACATAACAGTCATATTCTGCTTTTTCA
1:46467058-46468403_715	AATTGGTTCCTTGAGGGTTGTGTGGGACACATAACAGTCATATTCTGCTTTTTCATCCTCATAGATGTTAATGCTCTTTCTCAGCTGAAAGGTCCCATCTTCGTTTGGTCTAACTCCTGT
1:46467058-46468403_780	TGTTAATGCTCTTTCTCAGCTGAAAGGTCCCATCTTCGTTTGGTCTAACTCCTGTGGATTCTACCTCATTATCAGGCAGTGTAATGCGGTATTTCCTTATGTTCAAAATCACATCTTTGG
1:46467058-46468403_845	TCATTATCAGGCAGTGTAATGCGGTATTTCCTTATGTTCAAAATCACATCTTTGGGGTAGAATCCAGTGGCCAGACAAGTAAGTTTTAGCTTGATTTTGCCATTGATAATCCTCTTCGCA
1:46467058-46468403_910	AGTGGCCAGACAAGTAAGTTTTAGCTTGATTTTGCCATTGATAATCCTCTTCGCAAACACATGAACTTCTGGGGAAGCTGAAATCACAAGTACATTGTTTAATCAGTCAGTTCTATAACA
1:46467058-46468403_975	CTTCTGGGGAAGCTGAAATCACAAGTACATTGTTTAATCAGTCAGTTCTATAACACTAACCAAATGCTGTATGTTTACTCACAGCCTTCTCTAAGCTCCTTATCTCCATATTCTCTGAAT
1:46467058-46468403_1040	GCTGTATGTTTACTCACAGCCTTCTCTAAGCTCCTTATCTCCATATTCTCTGAATTTGTTGAGCCAGTCCACACACTCTTTTTCCAGGTAGCCCTTGGTGTACTGATTTAGGATGGGCAC
1:46467058-46468403_1170	TTCCTCTTGGTTGGAAGAGCTTCTTCCACTGGGGCAACCCACTGAGACTCCGCATCATCAAAAGAAAGGAAGTTTCTTCCATCATAGCTGTACTCATCAATGCCTCTGGAAAACCGGACA
1:46467058-46468403_1225	CATCAAAAGAAAGGAAGTTTCTTCCATCATAGCTGTACTCATCAATGCCTCTGGAAAACCGGACATCATTGCCCTGACTCTCAATTTCACAACCATGTCTCCACTGAAGAACATGAACAT
1:46469381-46469653_102	CTGCATTTTCTCTTTCATCCAGTGCTGTTTGGGAATCTTCTTCTGCTGTTCGCTATTGTAATAGTCAATCTGTCTGTCATCTAGCAAACCCATTGCAGTGAATTCATAGATGCCCGGCAG
1:46470500-46470764_0	ACGATAATGACGTCGATTAGTTTACTTTCGGTTTTAAGAAATATCCTACATAGGCCACTTATTGAGTAGCTATTTTTAAGTCAAAATAGCAGGCGACTCACCGGTCCAGGCTGGTACAAC
1:46470500-46470764_48	CATAGGCCACTTATTGAGTAGCTATTTTTAAGTCAAAATAGCAGGCGACTCACCGGTCCAGGCTGGTACAACCGCAACAAGCATCACTGCCGAAAACAAAACGGCAAAACTACCCATTCT
1:46470500-46470764_96	CTCACCGGTCCAGGCTGGTACAACCGCAACAAGCATCACTGCCGAAAACAAAACGGCAAAACTACCCATTCTGAAGCCTTTTGAGGCCGCGGTGTGTGTCTGTTTCCTCCTCCACTAACG
1:46470500-46470764_144	CAAAACGGCAAAACTACCCATTCTGAAGCCTTTTGAGGCCGCGGTGTGTGTCTGTTTCCTCCTCCACTAACGTCTTCTCTCTGATAGCTGACGAACAGGTTAAACTGTTATGAGACGGTC
1:54094740-54096554_0	CATGATCATCTACATGCTGAAGTTCACAAGACATTCAGATCAAATCTGCTGACAAAGTTTCAGTGTGTGTCTGAGGGAACAGCGACAGATAAATCCCCAACACTGCTGAATGAGATCTAC
1:54094740-54096554_63	TGTGTGTCTGAGGGAACAGCGACAGATAAATCCCCAACACTGCTGAATGAGATCTACACAGAGCTCTACATCACAGAGGGAGACAGTGGAGAGATCAATAATGAGCATGAGGTGAGACAG
1:54094740-54096554_126	CTCTACATCACAGAGGGAGACAGTGGAGAGATCAATAATGAGCATGAGGTGAGACAGATCGAGACTCAATCCAGGAGATCAACAACAGAGGACACACCGATCCAATGCAGAGACATCTTT
1:54094740-54096554_189	ACTCAATCCAGGAGATCAACAACAGAGGACACACCGATCCAATGCAGAGACATCTTTACAGCTTTACCTGGACAACACAAAGCCATCAGAACTGTGCTGACGAAGGGAGTCGCTGGCATC
1:54094740-54096554_252	TTACCTGGACAACACAAAGCCATCAGAACTGTGCTGACGAAGGGAGTCGCTGGCATCGGGAAAACAGTCTCTGTGCAGAAGTTCATCCTGGACTGGGCTGAAGAGAAGGAGAATCAGGAC
1:54094740-54096554_315	ACAGTCTCTGTGCAGAAGTTCATCCTGGACTGGGCTGAAGAGAAGGAGAATCAGGACGTCCAGCTCATATTTCCACTTCCTTTCAGAGAGATCAACCTGATGAAGGACAGAACACTCAGT
1:54094740-54096554_378	CTCATATTTCCACTTCCTTTCAGAGAGATCAACCTGATGAAGGACAGAACACTCAGTCTGGCAGATCTCCTGCATGTGTTTTTCCCTGAAACCAAAGAGATGGAGATATCCAGAGACGGA
1:54094740-54096554_441	GATCTCCTGCATGTGTTTTTCCCTGAAACCAAAGAGATGGAGATATCCAGAGACGGATATAAAGTGTTGTTCATCTTTGATGGTCTGGACGAGTGTCGTCTGTCTCTGGACTTTAACAGT
1:54094740-54096554_504	GTGTTGTTCATCTTTGATGGTCTGGACGAGTGTCGTCTGTCTCTGGACTTTAACAGTGGAGTGAAACTGTGTGATATTTCTGAATCGGCCTCAGTGGAGGATCTGCTGATGAACCTGATT
1:54094740-54096554_567	AAACTGTGTGATATTTCTGAATCGGCCTCAGTGGAGGATCTGCTGATGAACCTGATTGCGGGGAATCTGCTTCCCTCTGCTCTCATCTGGATCACCTCCAGACCAGCAGCAGCAGATCTC
1:54094740-54096554_630	AATCTGCTTCCCTCTGCTCTCATCTGGATCACCTCCAGACCAGCAGCAGCAGATCTCATTCCCTCTGCGTTTGTCCATCGACTGACGGAGGTACGAGGCTTCACTGACCCTCAGAAGGAG
1:54094740-54096554_693	TCTGCGTTTGTCCATCGACTGACGGAGGTACGAGGCTTCACTGACCCTCAGAAGGAGGAATACTTCAGGAAGAGGATCAGAGATCAGAGACTGGCTGATGAAATAATCCAACATCTGAAG
1:54094740-54096554_756	TTCAGGAAGAGGATCAGAGATCAGAGACTGGCTGATGAAATAATCCAACATCTGAAGTCCTGCAGGAGCCTCTTCATCATGTGCCACATCCCAGTGTTCTGCTGGATCTCAGCCACTGTT
1:54094740-54096554_819	AGGAGCCTCTTCATCATGTGCCACATCCCAGTGTTCTGCTGGATCTCAGCCACTGTTCTGGAGGAGATGATGAGGGGATCACGTAAAGGAGAGATTCCCAAGACTCTGACTGAGATGTAC
1:54094740-54096554_882	GAGATGATGAGGGGATCACGTAAAGGAGAGATTCCCAAGACTCTGACTGAGATGTACACACACTTCCTGATCATTCAGACCTGCATCAGACATGAGAAGCACTATGAGAAGAAGCTGAAG
1:54094740-54096554_945	TTCCTGATCATTCAGACCTGCATCAGACATGAGAAGCACTATGAGAAGAAGCTGAAGGACGAGGAGATGATCCTCAAACTGGGGAAACTGGCTTTCCGGCAGCTGATGAAAGGCAACCTG
1:54094740-54096554_1008	GAGATGATCCTCAAACTGGGGAAACTGGCTTTCCGGCAGCTGATGAAAGGCAACCTGATCTTCTATGAGGAGGACCTGAGAGAGTGTGGCATTGATGAGAGCGAAGCCTCCGTTTACTCA
1:54094740-54096554_1071	TATGAGGAGGACCTGAGAGAGTGTGGCATTGATGAGAGCGAAGCCTCCGTTTACTCAGGATTGTGCACTCAGATCTTCAGAGAGGAGCTGGGCTTGTTTCAGGGGAAAGTCTTCTGCTTT
1:54094740-54096554_1134	TGCACTCAGATCTTCAGAGAGGAGCTGGGCTTGTTTCAGGGGAAAGTCTTCTGCTTTGTTCATCTGAGCATTCAGGAGCATCTCGCAGCTCTTTATGTGCTGCTTTCATTCCTGCTGTAC
1:54094740-54096554_1197	CTGAGCATTCAGGAGCATCTCGCAGCTCTTTATGTGCTGCTTTCATTCCTGCTGTACGAGAGAGATGAGCTCAGTGAAAACCGCAGATCAAAATATGCACATTGGTTCAAACGTCAGACA
1:54094740-54096554_1260	GATGAGCTCAGTGAAAACCGCAGATCAAAATATGCACATTGGTTCAAACGTCAGACAATCTCTGACCTGCACCAGAGAGCCGTGGACAAGGCTCTGCAGAGCAGAAATGGACATCTGGAC
1:54094740-54096554_1323	GACCTGCACCAGAGAGCCGTGGACAAGGCTCTGCAGAGCAGAAATGGACATCTGGACCTCTTCCTCAGATTTCTTCTGGGTCTCTCATTGAAATCTAATCAGAGACTCCTGAACAATCAT
1:54094740-54096554_1386	CTCAGATTTCTTCTGGGTCTCTCATTGAAATCTAATCAGAGACTCCTGAACAATCATCTGACACAGGTTGGAAACATCTCATACAGTCAAGAGAAAACAGTCGAGTACATTAAAACACAA
1:54094740-54096554_1449	CAGGTTGGAAACATCTCATACAGTCAAGAGAAAACAGTCGAGTACATTAAAACACAAATCAAAATGAATCCTTCACCAGAGAAATCCATCAACCTGTTCCTCTGTTTAAATGAACTGGGT
1:54094740-54096554_1512	ATGAATCCTTCACCAGAGAAATCCATCAACCTGTTCCTCTGTTTAAATGAACTGGGTGATCATTCTCTCGTCAATGAAGTCCAGGAGTATGTCAGATCTGGAGATCTTTCAGGCAGCAGA
1:54094740-54096554_1575	TCTCTCGTCAATGAAGTCCAGGAGTATGTCAGATCTGGAGATCTTTCAGGCAGCAGATTCTCCTCCTCTCAGTGGTCAGCGGTGGTCTTTATTTTGTTGACTTTAGAGCAGTTGGATGAG
1:54094740-54096554_1638	TCCTCTCAGTGGTCAGCGGTGGTCTTTATTTTGTTGACTTTAGAGCAGTTGGATGAGTTTAATTTAAGAAGATATGTAATAGGCTATGGACACCAGACACAAACACAAAAGTTCCAGACA
1:54094740-54096554_1694	GTTTAATTTAAGAAGATATGTAATAGGCTATGGACACCAGACACAAACACAAAAGTTCCAGACACCTGATAAAGTTCTTCAGAAGCTCCTGCCTGTAGTTGAAGCCTCCAGATCAGCTGT
1:54156422-54158243_0	TTTATTTTAATCTTACAGCCATCGCAAACCCCTCCGGACATTCAGATCAAATCTGCTGAAGAAGTTTCAGTGTCTGTATGAGGGAACAGGGAGAATTAAATCCCCAACACTGCTGAATGA
1:54156422-54158243_63	GTTTCAGTGTCTGTATGAGGGAACAGGGAGAATTAAATCCCCAACACTGCTGAATGAGATCTACACAGAGCTCTACATCACAGAGGGAGACAGTGGAGAGATCAATAATGAGCATGAGGT
1:54156422-54158243_126	CACAGAGCTCTACATCACAGAGGGAGACAGTGGAGAGATCAATAATGAGCATGAGGTGAGACAGATCGAGACTCAATCCAGGAGATCAACAACAGAGGACACACCGATCCAATGCAGAGA
1:54156422-54158243_189	GATCGAGACTCAATCCAGGAGATCAACAACAGAGGACACACCGATCCAATGCAGAGACATCTTTACAGCTTTACCTGGACAACACAAAGCCATCAGAACTGTGCTGACGAAGGGAGTCGC
1:54156422-54158243_252	TACAGCTTTACCTGGACAACACAAAGCCATCAGAACTGTGCTGACGAAGGGAGTCGCTGGCATCGGGAAAACAGTCTCTGTGCAGAAGTTCATCCTGGACTGGGCTGAAGAGAAGGAGAA
1:54156422-54158243_315	CGGGAAAACAGTCTCTGTGCAGAAGTTCATCCTGGACTGGGCTGAAGAGAAGGAGAATCAGGACGTCCAGCTCATATTTCCACTTCCTTTCAGAGAGATCAACCTGATGAAGGACAGAAC
1:54156422-54158243_378	CGTCCAGCTCATATTTCCACTTCCTTTCAGAGAGATCAACCTGATGAAGGACAGAACACTCAGTCTGGCAGATCTCCTGCATGTGTTTTTCCCTGAAACCAAAGAGATGGAGATATCCAG
1:54156422-54158243_441	TCTGGCAGATCTCCTGCATGTGTTTTTCCCTGAAACCAAAGAGATGGAGATATCCAGAGACAGATATAAAGTGTTGTTCATCTTTGATGGTCTGGACGAGTGTCGTCTGTCTCTGGACTT
1:54156422-54158243_504	ATATAAAGTGTTGTTCATCTTTGATGGTCTGGACGAGTGTCGTCTGTCTCTGGACTTTAAGAGGAAAGTGAAACTGTGTGATATTTCTGAATCGGCCTCAGTGGAGGATCTGCTGATCAA
1:54156422-54158243_567	GAAAGTGAAACTGTGTGATATTTCTGAATCGGCCTCAGTGGAGGATCTGCTGATCAACCTGATTGTGGGGAATCTGCTTCCCTCTGCTCTCATCTGGATCACCTCCAGACCAGCAGCAGC
1:54156422-54158243_630	TGTGGGGAATCTGCTTCCCTCTGCTCTCATCTGGATCACCTCCAGACCAGCAGCAGCAGATCTCATTCCCTCTGCGTTTGTCCATCGACTGACAGAGGTACGAGGCTTCACGGACCCTCA
1:54156422-54158243_693	CATTCCCTCTGCGTTTGTCCATCGACTGACAGAGGTACGAGGCTTCACGGACCCTCAGAAGGAGGAATACTTCAGGAAGAGGATCAGAGATCAGAGACTGGCTGATGAAATAATCCAACA
1:54156422-54158243_756	GGAATACTTCAGGAAGAGGATCAGAGATCAGAGACTGGCTGATGAAATAATCCAACATCTGAAGTCCTGCAGGAGCCTCTTCATCATGTGCCACATCCCAGTGTTCTGCTGGATCTCAGC
1:54156422-54158243_819	GTCCTGCAGGAGCCTCTTCATCATGTGCCACATCCCAGTGTTCTGCTGGATCTCAGCCACTGTTCTGGAGGACATGATGAGAGGAACAGATATAGGAGAGATTCCCAAGACTCTGACTGA
1:54156422-54158243_882	TCTGGAGGACATGATGAGAGGAACAGATATAGGAGAGATTCCCAAGACTCTGACTGAGATGTACACACACTTCCTGATCATTCAGACCAGCATCAGACATGAGAGGCACTATGAGAAGAA
1:54156422-54158243_945	CACACACTTCCTGATCATTCAGACCAGCATCAGACATGAGAGGCACTATGAGAAGAAGCTGAAGGACGAGGAGATGATCCTCAAACTGGGGAAACTGGCTTTCCGGCAGCTGATGAAAGG
1:54156422-54158243_1008	GGACGAGGAGATGATCCTCAAACTGGGGAAACTGGCTTTCCGGCAGCTGATGAAAGGCAACCTGATCTTCTATGAGGAGGACCTGAGAGAGTGTGGCATTGATGAGAGCGAAGCCTCCGT
1:54156422-54158243_1071	GATCTTCTATGAGGAGGACCTGAGAGAGTGTGGCATTGATGAGAGCGAAGCCTCCGTTTACTCAGGATTGTGCACTCAGATCTTCAGAGAGGAGCTGGGCTTGTTTCAGGGGAAAGTCTT
1:54156422-54158243_1134	AGGATTGTGCACTCAGATCTTCAGAGAGGAGCTGGGCTTGTTTCAGGGGAAAGTCTTCTGCTTTGTTCATCTGAGCATTCAGGAGCATCTCGCAGCTCTTTATGTGCTGCTTTCATTCCT
1:54156422-54158243_1197	TGTTCATCTGAGCATTCAGGAGCATCTCGCAGCTCTTTATGTGCTGCTTTCATTCCTGCTGTACGAGAGAGATGAGCTCAGTGAAACCCTCATATCAAAAATTGCACATTTATTTAAACG
1:54156422-54158243_1260	CGAGAGAGATGAGCTCAGTGAAACCCTCATATCAAAAATTGCACATTTATTTAAACGTCAGACAATCTCTGACCTGCACCAGAGTGCTGTGGACAAGGCTCTGCAGAGCAGAAATGGACA
1:54156422-54158243_1323	AATCTCTGACCTGCACCAGAGTGCTGTGGACAAGGCTCTGCAGAGCAGAAATGGACATCTGGACCTCTTCCTCAGATTTCTTCTGGGTCTCTCACTGAAATCTAATCAGACACTCCTGAA
1:54156422-54158243_1386	CCTCTTCCTCAGATTTCTTCTGGGTCTCTCACTGAAATCTAATCAGACACTCCTGAAAAATCTTCTGACACAGGTTGGAAACATCTCATACAGTGAAGAGAAAACAGTCGAGTACATTAA
1:54156422-54158243_1449	TCTGACACAGGTTGGAAACATCTCATACAGTGAAGAGAAAACAGTCGAGTACATTAAAACACAAATCAAACTGAATCCTTCACCAGAGAAATCCATCAACCTGTTCCACTGTTTAAATGA
1:54156422-54158243_1512	AATCAAACTGAATCCTTCACCAGAGAAATCCATCAACCTGTTCCACTGTTTAAATGAACTGGGTGATCATTCTCTCGTCAATGAAGTCCAGGAGTATTTCAGATCTGGAGATCTTTCAGG
1:54156422-54158243_1575	TGATCATTCTCTCGTCAATGAAGTCCAGGAGTATTTCAGATCTGGAGATCTTTCAGGCAGCAGATTGTCCTCCTCTCAGTGGTCAGCGGTGGTCTTTGTTTTGTTGACTTCAGAGCAGTT
1:54156422-54158243_1638	ATTGTCCTCCTCTCAGTGGTCAGCGGTGGTCTTTGTTTTGTTGACTTCAGAGCAGTTGGATGAGTTTGATTTAAGAAGATATGTAATAGGCTATGGACACCAGACACAAACACAAAAGTT
1:54156422-54158243_1701	GTTTGATTTAAGAAGATATGTAATAGGCTATGGACACCAGACACAAACACAAAAGTTCCAGACACCTGATGAAGTTCTTCAGAAGCTCCTGCCTGTAGTTGAAACCTCCAGATCAGCTGT
1:54193035-54194837_0	CATCGCAAACCCCTCCAGACATTCAGATCAAATCTGCTGAAGAAGTTTCAGTGTGTGTCTGAGGGAACAGCGAGAAATAAATCCCCAACACTGCTGAATGAGATCTACACAGAGCTCTAC
1:54193035-54194837_63	GGAACAGCGAGAAATAAATCCCCAACACTGCTGAATGAGATCTACACAGAGCTCTACATCACAGAGGGAGACAGTGGAGAGATCAATAATGAGCATGAGGTGAGACAGATCGAGACTCAA
1:54193035-54194837_126	GAGGGAGACAGTGGAGAGATCAATAATGAGCATGAGGTGAGACAGATCGAGACTCAATCCAGGAGATCAACAACAGAGGACACACCGATCCAATGCAGAGACATCTTTACAGCTTTACCT
1:54193035-54194837_189	AGATCAACAACAGAGGACACACCGATCCAATGCAGAGACATCTTTACAGCTTTACCTGGACAACACAAAGCCATCAGAACTGTGCTGACGAAGGGAGTCGCTGGCATCGGGAAAACAGTC
1:54193035-54194837_252	CACAAAGCCATCAGAACTGTGCTGACGAAGGGAGTCGCTGGCATCGGGAAAACAGTCTCTGTGCAGAAGTTCATCCTGGACTGGGCTGAAGAGAAGGAGAATCAGGACGTCCAGCTCATA
1:54193035-54194837_315	CAGAAGTTCATCCTGGACTGGGCTGAAGAGAAGGAGAATCAGGACGTCCAGCTCATATTTCCACTTCCTTTCAGAGAGATCAACCTGATGAAGGACAGAACACTCAGTCTGGCAGATCTC
1:54193035-54194837_378	CTTCCTTTCAGAGAGATCAACCTGATGAAGGACAGAACACTCAGTCTGGCAGATCTCCTGCATGTGTTTTTCCCTGAAACCAAAGAGATGGAGATATCCAGAGACGGATATAAAGTGTTG
1:54193035-54194837_441	GTGTTTTTCCCTGAAACCAAAGAGATGGAGATATCCAGAGACGGATATAAAGTGTTGTTCATCTTTGATGGTCTGGACGAGTGTCGTCTGTCTCTGGACTTTAACAGTGGAGTGAAACTG
1:54193035-54194837_504	TTTGATGGTCTGGACGAGTGTCGTCTGTCTCTGGACTTTAACAGTGGAGTGAAACTGTGTGATATTTCTGAATCGGCCTCAGTGGAGGATCTGCTGATCAACCTGATTGTGGGGAATCTG
1:54193035-54194837_567	ATTTCTGAATCGGCCTCAGTGGAGGATCTGCTGATCAACCTGATTGTGGGGAATCTGCTTCCCTCTGCTCTCATCTGGATCACCTCCAGACCAGCAGCAGCAGATCTCATTCCCTCTGCG
1:54193035-54194837_630	TCTGCTCTCATCTGGATCACCTCCAGACCAGCAGCAGCAGATCTCATTCCCTCTGCGTTTGTCCATCGACTGACGGAGGTACGAGGCTTCACGGACCCTCAGAAGGAGGAATACTTCAGG
1:54193035-54194837_693	CATCGACTGACGGAGGTACGAGGCTTCACGGACCCTCAGAAGGAGGAATACTTCAGGAAGAGGATCAGAGATCAGAGACTGGCTGATGAAATAATCCAACATCTGAAGTCCTGCAGGAGC
1:54193035-54194837_756	ATCAGAGATCAGAGACTGGCTGATGAAATAATCCAACATCTGAAGTCCTGCAGGAGCCTCTTCATCATGTGCCACATCCCAGTGTTCTGCTGGATCTCAGCCACTGTTCTGGAGGACATG
1:54193035-54194837_819	ATCATGTGCCACATCCCAGTGTTCTGCTGGATCTCAGCCACTGTTCTGGAGGACATGATGAGGAGAACAGATATAGGAGAGATTCCCAAGACTCTGACTGAGATGTACACACACTTCCTG
1:54193035-54194837_882	AGAACAGATATAGGAGAGATTCCCAAGACTCTGACTGAGATGTACACACACTTCCTGATCATTCAGACCAGCATCAGACATGAGAAGCACTATGAGAAGAAGCTGAAGGATGAGGAGATG
1:54193035-54194837_945	CAGACCAGCATCAGACATGAGAAGCACTATGAGAAGAAGCTGAAGGATGAGGAGATGATCCTCAAACTGGGGAAACTGGCTTTCCGGCAGCTGATGAAAGGCAACCTGATCTTCTATGAG
1:54193035-54194837_1008	AAACTGGGGAAACTGGCTTTCCGGCAGCTGATGAAAGGCAACCTGATCTTCTATGAGGAGGACCTGAGAGAGTGTGGCATTGATGAGAGCGAAGCCTCCGTTTACTCAGGATTGTGCACT
1:54193035-54194837_1071	CTGAGAGAGTGTGGCATTGATGAGAGCGAAGCCTCCGTTTACTCAGGATTGTGCACTCAGATCTTCAGAGAGGAGCTGGGCTTGTTTCAGGGGAAAGTCTTCTGCTTTGTTCATCTGAGC
1:54193035-54194837_1134	TTCAGAGAGGAGCTGGGCTTGTTTCAGGGGAAAGTCTTCTGCTTTGTTCATCTGAGCATTCAGGAGCATCTCGCAGCTCTTTATGTGCTGCTTTCATTCCTGCTGTACGAGAGAGATGAG
1:54193035-54194837_1197	GAGCATCTCGCAGCTCTTTATGTGCTGCTTTCATTCCTGCTGTACGAGAGAGATGAGCTCAGTGAAAACTTCAGATCAACACGTCCACATGAGTTCACATGTCACACAGTCTTTGACCTG
1:54193035-54194837_1260	GAAAACTTCAGATCAACACGTCCACATGAGTTCACATGTCACACAGTCTTTGACCTGCACCAGAGAGCCGTGGACAAGGCACTGCAGAGCAGAAATGGACATCTGGACCTCTTTCTCAGA
1:54193035-54194837_1323	AGAGCCGTGGACAAGGCACTGCAGAGCAGAAATGGACATCTGGACCTCTTTCTCAGATTTCTTCTGGGTCTCTCATTGAAATCTAATCAGACACTCCTGAAAAATGTTCTGACACAGGTT
1:54193035-54194837_1386	CTGGGTCTCTCATTGAAATCTAATCAGACACTCCTGAAAAATGTTCTGACACAGGTTGGAAACATCTCATACAGTCAAGAGGAAACAGTTGAGTACATTAAAATAAGAATAAAACTGAAT
1:54193035-54194837_1449	ATCTCATACAGTCAAGAGGAAACAGTTGAGTACATTAAAATAAGAATAAAACTGAATCCTTCACCAGAGAAATCCATCAACCTGTTCCACTGTTTAAATGAACTGGGTGATCATTCTCTC
1:54193035-54194837_1512	CCAGAGAAATCCATCAACCTGTTCCACTGTTTAAATGAACTGGGTGATCATTCTCTCGTCAATGAAGTCCAGAAGTATGTCAGATCTGGAGATCTTTCAGGCAGCAGATTGTCCTCCTCT
1:54193035-54194837_1575	GAAGTCCAGAAGTATGTCAGATCTGGAGATCTTTCAGGCAGCAGATTGTCCTCCTCTCAGTGGTCAGCGGTGGTCTTTATTTTGTTGACTTCAGAGCAGTTGGATGAGTTTAATTTAAGA
1:54193035-54194837_1638	TCAGCGGTGGTCTTTATTTTGTTGACTTCAGAGCAGTTGGATGAGTTTAATTTAAGAAGATATTTAACAGACTCAGAACACCAGACACAAACACAAAAGCTCCAGACACCTGATGAAGTT
1:54193035-54194837_1682	GTTTAATTTAAGAAGATATTTAACAGACTCAGAACACCAGACACAAACACAAAAGCTCCAGACACCTGATGAAGTTCTTCAGAAGCTCCTGTCTGTAGTTGAAGCCTCCAGATCAGCTGT
1:55857982-55858500_0	TGACACAGAGAGACTTCAGAATCGTTGTAAAACCCAAATCCTGCATAGAGGGGTTCAGTGAATGTAGTGTTGAACGTGTATATGTGTGTGAGTGTGTGTGCGTCAGAGATGCTGTAAAAG
1:55857982-55858500_57	GTGAATGTAGTGTTGAACGTGTATATGTGTGTGAGTGTGTGTGCGTCAGAGATGCTGTAAAAGGACAGACGACCTGACGACACATCTAGATAGACCCCTACTCTATTGGATAAAGAGGAA
1:55857982-55858500_114	TAAAAGGACAGACGACCTGACGACACATCTAGATAGACCCCTACTCTATTGGATAAAGAGGAAGAGGGAGGAATAGGTGTGCTGTTAGCCTTCCCATCATGCCACGCAGAGAAAATCGTA
1:55857982-55858500_171	GAGGAAGAGGGAGGAATAGGTGTGCTGTTAGCCTTCCCATCATGCCACGCAGAGAAAATCGTATCGCAAAAGTACAGATTCCAGGACTTATTATTAAGACCGAAGCGACAGTCAATTCCT
1:55857982-55858500_228	ATCGTATCGCAAAAGTACAGATTCCAGGACTTATTATTAAGACCGAAGCGACAGTCAATTCCTCCTTTCCTCTGGATCCCTTTATATGCCACCGCTGCGTGACCCCAGCCTGTCAACTTA
1:55857982-55858500_285	ATTCCTCCTTTCCTCTGGATCCCTTTATATGCCACCGCTGCGTGACCCCAGCCTGTCAACTTAGCCTCCCAGTAACAGCGTCCAGTCAGAGTCTCTGCACTCAGAATCTGCTCATAGTTC
1:55857982-55858500_342	AACTTAGCCTCCCAGTAACAGCGTCCAGTCAGAGTCTCTGCACTCAGAATCTGCTCATAGTTCTCAAATCTGTCTGGATGATCAGGATACGGCTGATGATCTCTCACATGCGTTCCCCTT
1:55857982-55858500_398	ATAGTTCTCAAATCTGTCTGGATGATCAGGATACGGCTGATGATCTCTCACATGCGTTCCCCTTCTGTTGTCCTCAGACACAATCACGCGAGTGTGTGCTGTGTTTGGATCCAGTGAGAG
1:55865426-55867220_0	GAGCTCTTCTGCAGTTGCTGACGGCTGGTATCAGTCTTCTTCTGCCGTCATCGGATGTGTTGTATTTCCAGAACTCCAGCTCATCCAGCGCCTCCTCTGACAGCTGCAGCATGTAGGCGA
1:55865426-55867220_372	GAGAGACGCCCAGAAGAAACCGCAGGAACAGATCCAGATGGCCATTTTCACTCTCAAGAGCTTTATTGATTATATCTCTATGTAGATTTTGTATCACATCACAGAACTGCAGTGTGTCCA
1:55865426-55867220_434	TTATTGATTATATCTCTATGTAGATTTTGTATCACATCACAGAACTGCAGTGTGTCCACATTTTTTATCACGTAATGATAAAACAAATAGAAAGCAGCAAGAAACTCCTGAACGCTCAGA
1:55865426-55867220_558	TGAAGCTGTAGACTTTCCTCTGCTGAATCACAGATTCCTCCTTAAAGATCTCAGTGCAAATCCCAGAGTACACTGAGGCGTCAGAGACGTCTACGCCGCTCTCAATCAGGTCCTCCTCAT
1:55865426-55867220_620	CCAGAGTACACTGAGGCGTCAGAGACGTCTACGCCGCTCTCAATCAGGTCCTCCTCATAGAACATCACATTGCCCTTCATCAGCTGTCTGAAAGCCACTTCAGCAAGTTTGACAATCACT
1:55865426-55867220_682	CATCACATTGCCCTTCATCAGCTGTCTGAAAGCCACTTCAGCAAGTTTGACAATCACTTCTCTGCTAGACTGCAGGAGTTTCTCTGGATCTCTCTCTTCATACTTCTGATTCCTCATGTT
1:55865426-55867220_744	TGCTAGACTGCAGGAGTTTCTCTGGATCTCTCTCTTCATACTTCTGATTCCTCATGTTGATCTGAATCAGCAGGAAGTGGATGTACATCTCAGTCAGAGTTTGAGGGATTTCTGCACTCA
1:55865426-55867220_806	TGAATCAGCAGGAAGTGGATGTACATCTCAGTCAGAGTTTGAGGGATTTCTGCACTCAGATCTTCTTCCAGGAGCTTCTGAAGCACAGTGGATGAGATCCAGCAGAAGACGGGTATGTGG
1:55865426-55867220_868	TTCTTCCAGGAGCTTCTGAAGCACAGTGGATGAGATCCAGCAGAAGACGGGTATGTGGCACATGATGTGGAGGCTTTTTGCTCTTCTGATGTGTGAGATGATTCTGCTGGCTTGATGCTG
1:55865426-55867220_930	TGATGTGGAGGCTTTTTGCTCTTCTGATGTGTGAGATGATTCTGCTGGCTTGATGCTGCTCACTGATTCTCTTCCTGAAATATTCCTCCTTCTGAGGCTCAGTGAATCCCTGAATTTCTG
1:55865426-55867220_992	CTGATTCTCTTCCTGAAATATTCCTCCTTCTGAGGCTCAGTGAATCCCTGAATTTCTGTCAGACGCTTGATGTATTTGGAGGGGATCTGATTGGCTGCTGCTGGTCTGGAGGTGATCCAG
1:55865426-55867220_1054	ACGCTTGATGTATTTGGAGGGGATCTGATTGGCTGCTGCTGGTCTGGAGGTGATCCAGATGAGAGCAGAGGGAAGCAGCTCTCCTTTCATCAGCTTTGACATCAACACAGCCACTGATGA
1:55865426-55867220_1116	GAGCAGAGGGAAGCAGCTCTCCTTTCATCAGCTTTGACATCAACACAGCCACTGATGAAGTCTCAGTCACATCACAAACTTTCTGAGCGTCTGAAAACATCAGTGTGATTCTGCTTTCAT
1:55865426-55867220_1178	TCAGTCACATCACAAACTTTCTGAGCGTCTGAAAACATCAGTGTGATTCTGCTTTCATCCAGACCATCAAAGATGAACACAACTTTACACTCCTCATAAATCTTGGGCTCCAGATCTTCA
1:55865426-55867220_1240	ACCATCAAAGATGAACACAACTTTACACTCCTCATAAATCTTGGGCTCCAGATCTTCAAGTTCAGGATGGAAGTCCAGCAGAAGTCTGTGAAGACTGTATTGATGATCTCTGATCAAGTT
1:55865426-55867220_1302	CAGGATGGAAGTCCAGCAGAAGTCTGTGAAGACTGTATTGATGATCTCTGATCAAGTTCAGCTCTCGAAATGGAAGCACAAACATGAAATCTACATCCTGATTGGCTTTTCCCTCGGCCC
1:55865426-55867220_1364	TCTCGAAATGGAAGCACAAACATGAAATCTACATCCTGATTGGCTTTTCCCTCGGCCCAGTCCAGAATGAACTTCTGCACAGAGACGGTTTTTCCGATTCCAGCGATGCCTTTAGTAAGA
1:55865426-55867220_1426	CAGAATGAACTTCTGCACAGAGACGGTTTTTCCGATTCCAGCGATGCCTTTAGTAAGAACAGTCTTGATTTGCTCTTTCTCCTCTTTAAAGATGTCATTGCAGTAGATTGGAGTGTGTTG
1:55865426-55867220_1488	TCTTGATTTGCTCTTTCTCCTCTTTAAAGATGTCATTGCAGTAGATTGGAGTGTGTTGGGAGTGTTTTGTTCTGGCTGTTTTCTCCATCTGTAAAACCTCATGTTCTTCATTCACTCCTT
1:55865426-55867220_1550	TGTTTTGTTCTGGCTGTTTTCTCCATCTGTAAAACCTCATGTTCTTCATTCACTCCTTCACTCTCTCCTTCTATGATGTACAGCTGTGTGTAGACACTGTTCAGGAGGGTTTGAGTCTTT
1:55865426-55867220_1612	CTCTCCTTCTATGATGTACAGCTGTGTGTAGACACTGTTCAGGAGGGTTTGAGTCTTTTGGAGTTTGACTCCCTCAAATAATCCCTCATATTTGTTCTTCATGCTGATTTTGTGCAGATC
1:55865426-55867220_1674	GTTTGACTCCCTCAAATAATCCCTCATATTTGTTCTTCATGCTGATTTTGTGCAGATCTTTGACTCTTTGGAGGACATCGTTCTCTGCTTTCTGCAGATCAACTGTCTGATCGTATTTAG
1:57231149-57231423_0	CAGAAAATGGAGGCCATGAACAGGTTGATGACTGATATGCTTGAGGAACTTGTGGAGGCAGAGCTCAAACAGTTCACCAGGCAGCTGTGGATGGGTGTGAAACCAGGCGTCGATCCCATT
1:57231149-57231423_52	TGGAGGCAGAGCTCAAACAGTTCACCAGGCAGCTGTGGATGGGTGTGAAACCAGGCGTCGATCCCATTCCTCGTGGAAAGCTGGAGAATAAGGACCGTCAGGATGTGGTGGACTGTATGG
1:57231149-57231423_104	AGGCGTCGATCCCATTCCTCGTGGAAAGCTGGAGAATAAGGACCGTCAGGATGTGGTGGACTGTATGGTGCAGCATTACAGCAAGGATGCTGGGAAAATCGCTGTACAGGCTCTGCGCAG
1:57231149-57231423_154	ATGTGGTGGACTGTATGGTGCAGCATTACAGCAAGGATGCTGGGAAAATCGCTGTACAGGCTCTGCGCAGCATCAAGCAGAACGAGCGTGCAGATCGTCTCGAGTTGAATCTGCGGAAAG
1:57233352-57235191_0	GCTAAAGTCACAACAATTCTTGTGCTTTTGATTTCTAGATGATGACTTCTTAGGAGAAGTCCTCAAAAAACACAAGGAAAGCATAAAGGCCAGTGTAGATGTGTTTGAAGGCAAGAAAGA
1:57233352-57235191_62	TCAAAAAACACAAGGAAAGCATAAAGGCCAGTGTAGATGTGTTTGAAGGCAAGAAAGACAACAAAACAGACATCAACAAAGTGTACACCGAGCTGTTCATTACTGAAGGGGACATGACAG
1:57233352-57235191_124	AAAACAGACATCAACAAAGTGTACACCGAGCTGTTCATTACTGAAGGGGACATGACAGACGTCTGCAAAGAACACGAGGTTCAGAAGTTTGACCTAGCCTTGCAGATGCCAAGATCTGAG
1:57233352-57235191_186	CTGCAAAGAACACGAGGTTCAGAAGTTTGACCTAGCCTTGCAGATGCCAAGATCTGAGGACAAACCAATCGACTGTAATGAAATATTCAATTTGTTGAGGGGGAAGGACAAGGGAAACGT
1:57233352-57235191_248	AACCAATCGACTGTAATGAAATATTCAATTTGTTGAGGGGGAAGGACAAGGGAAACGTTGTTCTGACCAAAGGCATCGCCGGCATTGGAAAGACGTTCTCTGTGAACAAGTTCATCCTGG
1:57233352-57235191_310	CTGACCAAAGGCATCGCCGGCATTGGAAAGACGTTCTCTGTGAACAAGTTCATCCTGGACTGGGCTGAAGGAAGAGCCAATCTGGATGTGGACTGTATGTTTCTGCTTCCATTTCGAGAG
1:57233352-57235191_372	GGCTGAAGGAAGAGCCAATCTGGATGTGGACTGTATGTTTCTGCTTCCATTTCGAGAGATTAACTTGATGATAAAAGATGGAGATGTTAGTCTTCACAAGTTTCTGTTGAAACTTTTCCC
1:57233352-57235191_434	ACTTGATGATAAAAGATGGAGATGTTAGTCTTCACAAGTTTCTGTTGAAACTTTTCCCTGACATCACTGGCGTGGAAACGACACCGTTTTATGAAAAATGCAAACTGCTGTTCATCTTTG
1:57233352-57235191_496	ATCACTGGCGTGGAAACGACACCGTTTTATGAAAAATGCAAACTGCTGTTCATCTTTGATGGGCTTGATGAGAGTCGCCTGGATTTGAACTTTAACCTTAGTTCAGTGGACGATGTCCAT
1:57233352-57235191_558	GCTTGATGAGAGTCGCCTGGATTTGAACTTTAACCTTAGTTCAGTGGACGATGTCCATTCTTGCGCATCCATCGATGGTTTATTTACAAGCCTCATCAAAGGAAGGCTGCTTCGCTCATC
1:57233352-57235191_620	GCGCATCCATCGATGGTTTATTTACAAGCCTCATCAAAGGAAGGCTGCTTCGCTCATCTCTCATCTGGGTGACCTCACGACCCGCAGCGGCCAATCGGATCCCTTCCTACCATGTCGGGT
1:57233352-57235191_682	ATCTGGGTGACCTCACGACCCGCAGCGGCCAATCGGATCCCTTCCTACCATGTCGGGTTGTTCACTGAGGTGCGCGGATTCACTGACAAGCAGAAGGAGGAGTACTTCAGAAAAAAGGTC
1:57233352-57235191_744	CACTGAGGTGCGCGGATTCACTGACAAGCAGAAGGAGGAGTACTTCAGAAAAAAGGTCCCAGATGAAGATCAAGCTTCCAGGATAATCTCCCACATCCGGACGTCCCGCAGTCTCTACAT
1:57233352-57235191_806	ATGAAGATCAAGCTTCCAGGATAATCTCCCACATCCGGACGTCCCGCAGTCTCTACATCATGTGCCACATTCCCGTGTTCTGCTGGATCATCGCCACCGTTCTTCAGGATATTCTCCAGA
1:57233352-57235191_868	TGCCACATTCCCGTGTTCTGCTGGATCATCGCCACCGTTCTTCAGGATATTCTCCAGAAGAACAAAGGGGAGGACATTCCCTCCACCCTCACTGAGATGTACATCCACTTCCTGCTGATA
1:57233352-57235191_930	CAAAGGGGAGGACATTCCCTCCACCCTCACTGAGATGTACATCCACTTCCTGCTGATACAGATGAACATCAAGAACCAGAAGTATGATGAAAAACTGATACGGGATCGAACAGAGCTGTT
1:57233352-57235191_992	TGAACATCAAGAACCAGAAGTATGATGAAAAACTGATACGGGATCGAACAGAGCTGTTGGGTTCAAACAGAGACATGATTTCTAAGTTGGCCAAACTGGCGTTCGAACAGCTGAAGAAAG
1:57233352-57235191_1054	TCAAACAGAGACATGATTTCTAAGTTGGCCAAACTGGCGTTCGAACAGCTGAAGAAAGAGAACGTCATGTTCTACCGGGAGGATCTGGCAGCATGCGGCATTAACGCAGATGAAGAGTTC
1:57233352-57235191_1116	CGTCATGTTCTACCGGGAGGATCTGGCAGCATGCGGCATTAACGCAGATGAAGAGTTCACAGGACTGTGCACTGAGATCTTCAAGAAAGACTCTGTCCTGCATGAGCTGAAGGTGTATTA
1:57233352-57235191_1178	GACTGTGCACTGAGATCTTCAAGAAAGACTCTGTCCTGCATGAGCTGAAGGTGTATTACTTCATACACTTGAGTGTGCAGGAGTTCCTTGCTGCGCTGCATGTGTTTCTTTGCTACTTGG
1:57233352-57235191_1240	ATACACTTGAGTGTGCAGGAGTTCCTTGCTGCGCTGCATGTGTTTCTTTGCTACTTGGAGCTGGAAAAAGACATGAACTTGACAGATAGTGACCTGATGTTCTTCCTGGAGGATTCACGT
1:57233352-57235191_1302	GGAAAAAGACATGAACTTGACAGATAGTGACCTGATGTTCTTCCTGGAGGATTCACGTCCAAAACAGAAGGAGCTGTTGCACGTTCTGCTGAGGAAGGCGATCGATAAAGCGGAGAAGAG
1:57233352-57235191_1364	AACAGAAGGAGCTGTTGCACGTTCTGCTGAGGAAGGCGATCGATAAAGCGGAGAAGAGCGATCGAGGGCATTTTGATCTCTTTCTGCGGTTCCTGCTGGGCATTTCTCTCGAGTCCAATC
1:57233352-57235191_1426	CGAGGGCATTTTGATCTCTTTCTGCGGTTCCTGCTGGGCATTTCTCTCGAGTCCAATCAGAAGCTACTTATCGGCATCCTGAACGAAACAAAGAACAGTAAACAAAGCATCAGTAAAACC
1:57233352-57235191_1488	GCTACTTATCGGCATCCTGAACGAAACAAAGAACAGTAAACAAAGCATCAGTAAAACCGTTCAGTACCTCAAGCAGTTGCAAAACAATGACAAATGCCCAGATAAATCTATCAACCACTT
1:57233352-57235191_1550	AGTACCTCAAGCAGTTGCAAAACAATGACAAATGCCCAGATAAATCTATCAACCACTTCTTCTGCATCCTGGAACTGCAGGACAGAACCCTGTACCAACAAATCATGAAATATCTGAGGT
1:57233352-57235191_1612	TGCATCCTGGAACTGCAGGACAGAACCCTGTACCAACAAATCATGAAATATCTGAGGTCAAAGACAAATCGGCCAAAAGTCATGTCCAGATCAAACTGCTCAGCGCTGGTGTATGTGCTT
1:57233352-57235191_1674	GACAAATCGGCCAAAAGTCATGTCCAGATCAAACTGCTCAGCGCTGGTGTATGTGCTTCTGATGTCACAGGAAGTGCTGGACAAATTCAACCCAAAGTTGTTCAACAAAACATATGCGGG
1:57233352-57235191_1719	GGTGTATGTGCTTCTGATGTCACAGGAAGTGCTGGACAAATTCAACCCAAAGTTGTTCAACAAAACATATGCGGGATGCAGGATTCTCGTGCCAGCCGTGAGATGCAGCCGCAAGGCCCT
1:57240601-57241124_0	TGCATTCAATCTCACTCTGAATCCAAACACAGCTCACGTTCATCTGCTTCTCTCTGACGGAGACAGAAAGGTGACTCTAAAAGAGAAACAGCCGTATCCTGATGATCCGGAGAGATTTGA
1:57240601-57241124_58	GGAGACAGAAAGGTGACTCTAAAAGAGAAACAGCCGTATCCTGATGATCCGGAGAGATTTGAAGAGCATCATCAAGTGCTGTCCAGAGAGAGTCTGTCCGGACGCTGTTACTGGGAGACT
1:57240601-57241124_116	TTGAAGAGCATCATCAAGTGCTGTCCAGAGAGAGTCTGTCCGGACGCTGTTACTGGGAGACTGAATGGACGGGTCAGGAAGGCACGGTCGGTGTGGCGTATGAAAGCATCCCGAGGAAAC
1:57240601-57241124_174	GACTGAATGGACGGGTCAGGAAGGCACGGTCGGTGTGGCGTATGAAAGCATCCCGAGGAAACCTGATGATCTTTTGTATGGCAGGTGCATGCTTGGAAACAACATCATTTCATGGAAGAT
1:57240601-57241124_232	AAACCTGATGATCTTTTGTATGGCAGGTGCATGCTTGGAAACAACATCATTTCATGGAAGATTACGTGTGGAAGTCGCACACATGTTTCACACGCTGAAGAAGATATTACTGTGAAATCT
1:57240601-57241124_290	AGATTACGTGTGGAAGTCGCACACATGTTTCACACGCTGAAGAAGATATTACTGTGAAATCTCCATCCTCTGGCTCATGTAAGAGAGTGGGTGTGTATGTGGACACAACCGCTGGTGTTT
1:57240601-57241124_348	ATCTCCATCCTCTGGCTCATGTAAGAGAGTGGGTGTGTATGTGGACACAACCGCTGGTGTTTTGTCCTTTTACCACGTCTTTGACACACTCACACACTTGTACACCTTCCTCATGCCTTT
1:57240601-57241124_403	GGTGTTTTGTCCTTTTACCACGTCTTTGACACACTCACACACTTGTACACCTTCCTCATGCCTTTCACACAGCCTCTCTATGCAGCATTCAGAGTGGACGGCGAATCTGTGTCCATCTGT
1:57264460-57264745_0	TTTAGACACCACCGCAAGTGTCTTCTTCAGCTGTTCTGCAAGGTTGTTTTGATTCATGCTGTGCAGCAGACGGACCGCTACCTTCCCTGCTTCTGAAGTGCCGAAATGCTGCTCCATGTA
1:57264460-57264745_55	ATGCTGTGCAGCAGACGGACCGCTACCTTCCCTGCTTCTGAAGTGCCGAAATGCTGCTCCATGTAATCCACAACATCCTGCCTATCGGCATTCTCCAGTTTTCCTCGAGGAATGGAGTTT
1:57264460-57264745_110	GCTCCATGTAATCCACAACATCCTGCCTATCGGCATTCTCCAGTTTTCCTCGAGGAATGGAGTTTTCAAGGGTCTCCTTATTCGACAGACGCCATTTAAAATCTTTAAACTCGCGTTCCC
1:57264460-57264745_165	AATGGAGTTTTCAAGGGTCTCCTTATTCGACAGACGCCATTTAAAATCTTTAAACTCGCGTTCCCGAAGTTCATCGAGCACATCAAGAATCTCTGTTTTGGTTGAAGCCATTTTGAGTCA
1:57311385-57311902_0	CCCGGTGATCCTGAACCCAAACACTTCTGCACCACAGCTCTCTGTGTCAGACGATCTGACCTCTGTGACCTCATCAACCCATCGACAGAACCAAACCAGCGATCTTCCTCTGCACAGGAG
1:57311385-57311902_57	GACCTCTGTGACCTCATCAACCCATCGACAGAACCAAACCAGCGATCTTCCTCTGCACAGGAGCCGTGTGGTGCTGGGCAGCGTGGGATACAGTGATGGAGATCACACATGGGAGATTGA
1:57311385-57311902_114	CAGGAGCCGTGTGGTGCTGGGCAGCGTGGGATACAGTGATGGAGATCACACATGGGAGATTGAGGTGGGAAAAAGTCGACACTGGAGCCTCGGAGTGTGTCTTGAATTGAAGGGAAAACC
1:57311385-57311902_171	GATTGAGGTGGGAAAAAGTCGACACTGGAGCCTCGGAGTGTGTCTTGAATTGAAGGGAAAACCCATTACGCAACCGTTGATCCCTGCAAATGGCTTCTGGGGTCTCAAACGTGAGGGATA
1:57311385-57311902_228	AAAACCCATTACGCAACCGTTGATCCCTGCAAATGGCTTCTGGGGTCTCAAACGTGAGGGATACATGTACCACTTGATGACCGCTGAGGCGTGTGAAATAAACATTAAGAGAAATCCTGA
1:57311385-57311902_285	GGGATACATGTACCACTTGATGACCGCTGAGGCGTGTGAAATAAACATTAAGAGAAATCCTGAGGTAGTGAGAGTAAAGCTTGATTATGTGTGTGACGACACAATGGAAAAACAACGCTG
1:57311385-57311902_342	TCCTGAGGTAGTGAGAGTAAAGCTTGATTATGTGTGTGACGACACAATGGAAAAACAACGCTGGAGGAGGGTGAGCTTTATTGATGCCAGCTGTGATGCGGTTATTGAAAGATTTTCTAG
1:57311385-57311902_397	CAACGCTGGAGGAGGGTGAGCTTTATTGATGCCAGCTGTGATGCGGTTATTGAAAGATTTTCTAGAGTGCCGCTGCAGCATAAACTCTTTCCCTTTGTGATCCCAGAAGATCAGTCCATC
1:57323185-57323461_0	TTTCAGCAGATTGGACTCGAGCCGCTTTGCACGTTCGTTCTGCTTGATTTTGCGCAGTGTCTGTACTGTGATTGTCCCGGCATCCTCGCTGTACTGCTGAACCATGCTGTCCACCACATC
1:57323185-57323461_52	CGCAGTGTCTGTACTGTGATTGTCCCGGCATCCTCGCTGTACTGCTGAACCATGCTGTCCACCACATCCTGACGGTCCTTATTCTCCAGCTTTCCCCGAGGAATGGGTTCGACGCCTGGT
1:57323185-57323461_104	TGCTGTCCACCACATCCTGACGGTCCTTATTCTCCAGCTTTCCCCGAGGAATGGGTTCGACGCCTGGTTTCACACCGATCCACAGCTGCCTGGTGAACTGTTTGAGCTCTGACTCCACAA
1:57323185-57323461_156	GGGTTCGACGCCTGGTTTCACACCGATCCACAGCTGCCTGGTGAACTGTTTGAGCTCTGACTCCACAAGATCCTCGAGCACATCAGACAGCAGCTGGGTAATATCCTCCATTTTCTGTCA
1:57332521-57334392_0	GACAGAAAAAGACAGAGATCACAGTCTCCAGAACCAAGTGGTGTCTCTAAAAAGAGAAGCAGATCAATGACCCCACCATCGGACTTCAGTGATAAACCAGTGACATTTGACTCGATGATG
1:57332521-57334392_63	TCAATGACCCCACCATCGGACTTCAGTGATAAACCAGTGACATTTGACTCGATGATGAAAATAAAATTACAAAAAATTAAAGACCAGCACAAAACCAGCATGAAGAACAAGTATGAGAAA
1:57332521-57334392_126	AAATTACAAAAAATTAAAGACCAGCACAAAACCAGCATGAAGAACAAGTATGAGAAAATATTTGAAGGAAACAAACTCAATCAGAATGAAACCCTCCTGAACCAGATCTACACCCAGCTG
1:57332521-57334392_189	GAAGGAAACAAACTCAATCAGAATGAAACCCTCCTGAACCAGATCTACACCCAGCTGTACATCATAGAGGGAGAGAGTGAAGGAGTGAATGAAGAACATGAGGTTTTACAGATGGAGAAA
1:57332521-57334392_252	ATAGAGGGAGAGAGTGAAGGAGTGAATGAAGAACATGAGGTTTTACAGATGGAGAAAACAGCCAGAACAAAACACTCCCAACACACTCCAATCTACTGCAATGACATCTTTAAAGAGGAG
1:57332521-57334392_315	AGAACAAAACACTCCCAACACACTCCAATCTACTGCAATGACATCTTTAAAGAGGAGAAAGAGCAAATCAAGACTGTTCTTACTAAAGGCATCGCTGGAATCGGAAAAACCGTCTCTGTG
1:57332521-57334392_378	CAAATCAAGACTGTTCTTACTAAAGGCATCGCTGGAATCGGAAAAACCGTCTCTGTGCAGAAGTTCATTCTGGACTGGGCCGAGGGAAAAGCCAATCAGGATGTAGATTTCATGTTTGTG
1:57332521-57334392_441	TTCATTCTGGACTGGGCCGAGGGAAAAGCCAATCAGGATGTAGATTTCATGTTTGTGCTTCCATTTCGAGAGCTGAACTTGATCAGAGATCATCAGTACAGTCTTCACACACTTCTGCTG
1:57332521-57334392_504	TTTCGAGAGCTGAACTTGATCAGAGATCATCAGTACAGTCTTCACACACTTCTGCTGGACTTTCATCCTGAACTTGAAGATCTGGAGCCCAAGATTTATGAGGAGTGTAAAGTTGTGTTC
1:57332521-57334392_567	CATCCTGAACTTGAAGATCTGGAGCCCAAGATTTATGAGGAGTGTAAAGTTGTGTTCATCTTTGATGGTCTGGATGAAAGCAGAATCACACTGATGTTTTCAGACGCTCAGAAAGTTTGT
1:57332521-57334392_630	GATGGTCTGGATGAAAGCAGAATCACACTGATGTTTTCAGACGCTCAGAAAGTTTGTGATGTGACTGAGACTTCATCAGTGGCTGTGTTGATGTCAAAGCTGATGAAAGGAGAGCTGCTT
1:57332521-57334392_693	ACTGAGACTTCATCAGTGGCTGTGTTGATGTCAAAGCTGATGAAAGGAGAGCTGCTTCCCTCTGCTCTCATCTGGATCACCTCCAGACCAGCAGCAGCCAATCAGATCCCCTCCAAATAC
1:57332521-57334392_756	GCTCTCATCTGGATCACCTCCAGACCAGCAGCAGCCAATCAGATCCCCTCCAAATACATCAAGCGTCTGACAGAAATTCAGGGATTCACTGAGCCTCAGAAGGAGGAATATTTCAGGAAG
1:57332521-57334392_819	CGTCTGACAGAAATTCAGGGATTCACTGAGCCTCAGAAGGAGGAATATTTCAGGAAGAGAATCAGTGAGCAGCATCAAGCCAGCAGAATCATCTCACACATCAGAAGAGCAAGAAGCCTC
1:57332521-57334392_882	AGTGAGCAGCATCAAGCCAGCAGAATCATCTCACACATCAGAAGAGCAAGAAGCCTCCACATCATGTGCCACATACCCGTCTTCTGCTGGATCTCATCCACTGTGCTTCAGAAGCTCCTG
1:57332521-57334392_945	ATGTGCCACATACCCGTCTTCTGCTGGATCTCATCCACTGTGCTTCAGAAGCTCCTGGAAGAAGATCAGAGTGCAGAAATCCCTCAAACTCTGACTGAAATGTACATCCACTTCCTGCTG
1:57332521-57334392_1008	GATCAGAGTGCAGAAATCCCTCAAACTCTGACTGAAATGTACATCCACTTCCTGCTGATTCAGATCAACATGAGGAATCAGAAGTATGAAGAGAGAGATCCAGAGAAACTCCTGCAGTCC
1:57332521-57334392_1071	ATCAACATGAGGAATCAGAAGTATGAAGAGAGAGATCCAGAGAAACTCCTGCAGTCCAACAGAGAAGTGATTGTCAAACTTGCTGAAGTGGCTTTCAGACAGCTGATGAAGGGCAATGTG
1:57332521-57334392_1134	GAAGTGATTGTCAAACTTGCTGAAGTGGCTTTCAGACAGCTGATGAAGGGCAATGTGATGTTCTATGAGGAGGACCTGATTGAGAGCGGCGTAGACGTCTCTGACGCCTCAGTGTATTCT
1:57332521-57334392_1197	TATGAGGAGGACCTGATTGAGAGCGGCGTAGACGTCTCTGACGCCTCAGTGTATTCTGGGATTTGCACTGAGATCTTTAAGGAGGAATCTGTGATTCAGCAGAGGAAAGTCTACAGCTTC
1:57332521-57334392_1260	TGCACTGAGATCTTTAAGGAGGAATCTGTGATTCAGCAGAGGAAAGTCTACAGCTTCATCCATCTGAGTGTTCAGGAGTTCCTCGCTGCTTTCCATGTGTTTTACGTTCATGTAAGCAGC
1:57332521-57334392_1323	CTGAGTGTTCAGGAGTTCCTCGCTGCTTTCCATGTGTTTTACGTTCATGTAAGCAGCACTGCAGAAGCATCTTTTGATTCATTAGAAAATCTCCATAAAAGAATCATTGATAAAGCCATT
1:57340495-57341034_0	TGCCTGTTTTCTCACACTGGATCCAAACACAGCACACAGTCATCTGGTCTTGTCTGACGGGAACAGAAGAACAACACATATAAAAGATCTTCAGTTGTATCCTGATCACCCAGACAGATT
1:57340495-57341034_60	GAACAGAAGAACAACACATATAAAAGATCTTCAGTTGTATCCTGATCACCCAGACAGATTCGAGCACCACGAGCAGGTTCTGTGTAGAGAGACTCTGACTGGACGCTGTTACTGGGAAGT
1:57340495-57341034_120	CGAGCACCACGAGCAGGTTCTGTGTAGAGAGACTCTGACTGGACGCTGTTACTGGGAAGTTGAATGGAGGGGATCGACCTATATAGCAGTGGCCTACAGAGGAAACAGCAGGAAAGGAGG
1:57340495-57341034_180	TGAATGGAGGGGATCGACCTATATAGCAGTGGCCTACAGAGGAAACAGCAGGAAAGGAGGAAGCGACTGTCGGTTTGGACTCAATGAAAACTCCTGGAGTCTCTATTGTTGTGAGAATAT
1:57340495-57341034_240	AAGCGACTGTCGGTTTGGACTCAATGAAAACTCCTGGAGTCTCTATTGTTGTGAGAATATTTACATTGTCTGGCACAATAATAAGAGCACAAACATTGCCACTCCTTCACCCCAGTCTAA
1:57340495-57341034_300	TTACATTGTCTGGCACAATAATAAGAGCACAAACATTGCCACTCCTTCACCCCAGTCTAATAGAGTAGGGGTGTATGTGGACGTGCCGTCCGGCTCTCTGTCCTTCTACAGCATCTCTAA
1:57340495-57341034_360	TAGAGTAGGGGTGTATGTGGACGTGCCGTCCGGCTCTCTGTCCTTCTACAGCATCTCTAAAACACACACACTCACACACTTATATACAATCAACACCACATTCACTGAACCCCTTTATGC
1:57340495-57341034_419	AAACACACACACTCACACACTTATATACAATCAACACCACATTCACTGAACCCCTTTATGCTGGATTCAGAGTTTATCCTGAATCTGCAGTGTCTTTGTGCTAGATTTAACACACACACA
1:57349580-57351436_0	AGAAAAAAGAAACATGAGCTGATCACACCAGTGCCATACTCTACATCCAACTATCAGACTCTCATTACACAGGAGAATACTGAAACAAACGCACTGGAGACTGGAGACCTGCAGCTAGTC
1:57349580-57351436_124	ACCAGCACAAAACCAGCATGAAGAACAAATATGAGAGATTATTTGAGGGAAACAGACTCCAAGAAAACCAAACCCTCCTGAACCGCATCTACACCCAGCTGTACATCATAGAGGGAGAGA
1:57349580-57351436_186	GAAAACCAAACCCTCCTGAACCGCATCTACACCCAGCTGTACATCATAGAGGGAGAGAGTGCAGGAGTGAATGAAGAACATGAGGTTTTACAGATGGAGAAAACAGCCAGAACAAAACAC
1:57349580-57351436_248	AGGAGTGAATGAAGAACATGAGGTTTTACAGATGGAGAAAACAGCCAGAACAAAACACTCCCAACACACTCCAATCTACTGCAATGACATCTTTAAAGAGGAGAAAGAGCAAATCAAGAC
1:57349580-57351436_310	AACACACTCCAATCTACTGCAATGACATCTTTAAAGAGGAGAAAGAGCAAATCAAGACTGTTCTTACTAAAGGCATCGCTGGAATCGGAAAAACCGTCTCTGTGCAGAAGTTCATTCTGG
1:57349580-57351436_372	CTTACTAAAGGCATCGCTGGAATCGGAAAAACCGTCTCTGTGCAGAAGTTCATTCTGGACTGGGCCGAGGGAAAAGCCAATCAGGATGTAGATTTCATGTTTGTGCTTCCATTTCGAGAG
1:57349580-57351436_434	GGCCGAGGGAAAAGCCAATCAGGATGTAGATTTCATGTTTGTGCTTCCATTTCGAGAGCTGAACTTGATCAGAGATCATCAGTACAGTCTTCACACACTTCTGCTGGACTTTCATCCTGA
1:57349580-57351436_496	ACTTGATCAGAGATCATCAGTACAGTCTTCACACACTTCTGCTGGACTTTCATCCTGAACTTGAAGATCTGGAGCCCAAGATTTATGAGGAGTGTAAAGTTGTGTTCATCTTTGATGGTC
1:57349580-57351436_558	GAAGATCTGGAGCCCAAGATTTATGAGGAGTGTAAAGTTGTGTTCATCTTTGATGGTCTGGATGAAAGCAGAATCACACTGATGTTTTCAGACGCTCAGAAAGTTTGTGATGTGACTGAG
1:57349580-57351436_620	TGAAAGCAGAATCACACTGATGTTTTCAGACGCTCAGAAAGTTTGTGATGTGACTGAGACTTCATCAGTGGCTGTGTTGATGTCAAAGCTGATGAAAGGAGAGCTGCTTCCCTCTGCTCT
1:57349580-57351436_682	CATCAGTGGCTGTGTTGATGTCAAAGCTGATGAAAGGAGAGCTGCTTCCCTCTGCTCTCATCTGGATCACCTCCAGACCAGCAGCAGCCAATCAGATCCCCTCCAAATACATCAAGCGTC
1:57349580-57351436_744	TGGATCACCTCCAGACCAGCAGCAGCCAATCAGATCCCCTCCAAATACATCAAGCGTCTGACAGAAATTCAGGGATTCACTGAGCCTCAGAAGGAGGAATATTTCAGGAAGAGAATCAGT
1:57349580-57351436_806	AGAAATTCAGGGATTCACTGAGCCTCAGAAGGAGGAATATTTCAGGAAGAGAATCAGTGAGCAGCATCAAGCCAGCAGAATCATCTCACACATCAGAAGAGCAAGAAGCCTCCACATCAT
1:57349580-57351436_868	AGCATCAAGCCAGCAGAATCATCTCACACATCAGAAGAGCAAGAAGCCTCCACATCATGTGCCACATACCCGTCTTCTGCTGGATCTCATCCACTGTGCTTCAGAAGCTCCTGGAAGAAG
1:57349580-57351436_930	CACATACCCGTCTTCTGCTGGATCTCATCCACTGTGCTTCAGAAGCTCCTGGAAGAAGATCTGAGTGCAGAAATCCCTCAAACTCTGACTGAAATGTACATCCACTTCCTGCTGATTCAG
1:57349580-57351436_992	GAGTGCAGAAATCCCTCAAACTCTGACTGAAATGTACATCCACTTCCTGCTGATTCAGATCAACATGAGGAATCAGAAGTATGAAGAGAGAGATCCAGAGAAACTCCTGCAGTCCAACAG
1:57349580-57351436_1054	ACATGAGGAATCAGAAGTATGAAGAGAGAGATCCAGAGAAACTCCTGCAGTCCAACAGAGAAGTGATTGTCAAACTTGCTGAAGTGGCTTTCAGACAGCTGATGAAGGGCAATGTGATGT
1:57349580-57351436_1116	GTGATTGTCAAACTTGCTGAAGTGGCTTTCAGACAGCTGATGAAGGGCAATGTGATGTTCTATGAGGAGGACCTGATTGAGAGCGGCGTAGACGTCTCTGACACCTCAGTGTATTCTGGG
1:57349580-57351436_1178	TGAGGAGGACCTGATTGAGAGCGGCGTAGACGTCTCTGACACCTCAGTGTATTCTGGGATTTGCACCGAGATCTTTAAGGAGGAATCTGTGATTCAGCAGAGGAAAGTCTACAGCTTCAT
1:57349580-57351436_1240	GCACCGAGATCTTTAAGGAGGAATCTGTGATTCAGCAGAGGAAAGTCTACAGCTTCATCCATCTGAGTGTTCAGGAGTTCCTCGCTGCTTTCTATGTGTTTTATTATTATGTAATGAAAA
1:57349580-57351436_1302	CTGAGTGTTCAGGAGTTCCTCGCTGCTTTCTATGTGTTTTATTATTATGTAATGAAAAATGTGGACACGTTGCAATTTTGTGATGTGATGCATGATCTGCATAAGAATGCAGTAGATAAA
1:57352737-57353267_0	TGCCTGTTTTCTCACACTGGATCCAAACACAGCACATATTCAACTGCAAGTGTCTGATGGAAACAGAAAGGCAGTGCATGTGAAAGATCCTCAGCCGTATCCCGATCATCCCGACAGATT
1:57352737-57353267_59	GAAACAGAAAGGCAGTGCATGTGAAAGATCCTCAGCCGTATCCCGATCATCCCGACAGATTTGATCAACAGGAGCAGGTTCTGTGTAAAGAGCCTATCACTGGACGCTGTTACTGGGAGG
1:57352737-57353267_118	TTTGATCAACAGGAGCAGGTTCTGTGTAAAGAGCCTATCACTGGACGCTGTTACTGGGAGGTGAAATGGAGCGGCTCTGTTCTTATAACAGCGGCTTTTAAAGCAATTGATAGAAAAGGA
1:57352737-57353267_177	GGTGAAATGGAGCGGCTCTGTTCTTATAACAGCGGCTTTTAAAGCAATTGATAGAAAAGGAGGTAGTAACTGTCGGTTTGGACGCAATGAAAATTCTTGGAGTCTGTACTGTTATGACAG
1:57352737-57353267_236	GAGGTAGTAACTGTCGGTTTGGACGCAATGAAAATTCTTGGAGTCTGTACTGTTATGACAGAATTTACTCTTTCTGGCACAACAATAAGAGCACTGATATTATTGCTCCATCTCGTAGTA
1:57352737-57353267_295	AGAATTTACTCTTTCTGGCACAACAATAAGAGCACTGATATTATTGCTCCATCTCGTAGTAATAGAGTAGGAGTGTATGTGGACGTGCCGTCCGGCTGTCTGTCCTTCTACAGCATCTCT
1:57352737-57353267_354	TAATAGAGTAGGAGTGTATGTGGACGTGCCGTCCGGCTGTCTGTCCTTCTACAGCATCTCTGACACAAACACACTCACACACTTGCGCACATTCAACAACACATTTACAGAATCGATCTA
1:57352737-57353267_410	TCTCTGACACAAACACACTCACACACTTGCGCACATTCAACAACACATTTACAGAATCGATCTATGCTGGTTTTAAGGTTTATCCTGAATCTTCAGTGTCTCTGTCTCAGATTTAAAAAC
1:57362402-57364204_0	CATATCCACATCAGGCAGAAAACAAAAACATCCATTCAGACAGAAACTGGAGTCCTGCAGAGAGTCAAAGACCAGCACAAAACCAGCATGAAGAACAAGTATGAGAGATTATTTGAGGGA
1:57362402-57364204_63	GTCAAAGACCAGCACAAAACCAGCATGAAGAACAAGTATGAGAGATTATTTGAGGGAAACACACTCCAAGAGAACCAAACCCTCCTGAACCGCATCTACACCCAGCTGTACATCATAGAG
1:57362402-57364204_126	CTCCAAGAGAACCAAACCCTCCTGAACCGCATCTACACCCAGCTGTACATCATAGAGGGAGAGAGTGAAGGAGTGAATGAAGAACATGAGGTTTTACAGATGGAGAAAACAGCCAGAACA
1:57362402-57364204_189	AGTGAAGGAGTGAATGAAGAACATGAGGTTTTACAGATGGAGAAAACAGCCAGAACAAAACAATCCCAACACACTCCAATCTACTGCAATGACATCTTTAAAGAGGAGAAAGAGCAAATC
1:57362402-57364204_252	TCCCAACACACTCCAATCTACTGCAATGACATCTTTAAAGAGGAGAAAGAGCAAATCAAGACTGTTCTTACTAAAGGCATCGCTGGAATCGGAAAAACCGTCTCTGTGCAGAAGTTCATT
1:57362402-57364204_315	GTTCTTACTAAAGGCATCGCTGGAATCGGAAAAACCGTCTCTGTGCAGAAGTTCATTCTGGACTGGGCCGAGGGAAAAGCCAATCAGGATGTAGATTTCATGTTTGTGCTTCCATTTCGA
1:57362402-57364204_378	TGGGCCGAGGGAAAAGCCAATCAGGATGTAGATTTCATGTTTGTGCTTCCATTTCGAGAGCTGAACTTGATCAGAGATCATCAGTACAGTCTTCACACACTTCTGCTGGACTTTCATCCT
1:57362402-57364204_441	AACTTGATCAGAGATCATCAGTACAGTCTTCACACACTTCTGCTGGACTTTCATCCTGAACTTGAAGATCTGGAGCCCAAGATTTATGAGGAGTGTAAAGTTGTGTTCATCTTTGATGGT
1:57362402-57364204_504	GAAGATCTGGAGCCCAAGATTTATGAGGAGTGTAAAGTTGTGTTCATCTTTGATGGTCTGGATGAAAGCAGAATCACACTGATGTTTTCAGACGCTCAGAAAGTTTGTGATGTGACTGAG
1:57362402-57364204_567	GAAAGCAGAATCACACTGATGTTTTCAGACGCTCAGAAAGTTTGTGATGTGACTGAGACTTCATCAGTGGCTGTGTTGATGTCAAAGCTGATGAAAGGAGAGCTGCTTCCCTCTGCTCTC
1:57362402-57364204_630	TCAGTGGCTGTGTTGATGTCAAAGCTGATGAAAGGAGAGCTGCTTCCCTCTGCTCTCATCTGGATCACCTCCAGACCAGCAGCAGCCAATCAGATCCCCTCCAAATACATCAAGCGTCTG
1:57362402-57364204_693	ATCACCTCCAGACCAGCAGCAGCCAATCAGATCCCCTCCAAATACATCAAGCGTCTGACAGAAATTCAGGGATTCACTGAGCCTCAGAAGGAGGAATATTTCAGGAAGAGAATCAGTGAG
1:57362402-57364204_756	ATTCAGGGATTCACTGAGCCTCAGAAGGAGGAATATTTCAGGAAGAGAATCAGTGAGCAGCATCAAGCCAGCAGAATCATCTCACACATCAGAAGAGCAAGAAGCCTCCACATCATGTGC
1:57362402-57364204_819	CAAGCCAGCAGAATCATCTCACACATCAGAAGAGCAAGAAGCCTCCACATCATGTGCCACATACCCGTCTTCTGCTGGATCTCATCCACTGTGCTTCAGAAGCTCCTGGAAGAAGATCTG
1:57362402-57364204_882	CCCGTCTTCTGCTGGATCTCATCCACTGTGCTTCAGAAGCTCCTGGAAGAAGATCTGAGTGCAGAAATCCCTCAAACTCTGACTGAAATGTACATCCACTTCCTGCTGATTCAGATCAAC
1:57362402-57364204_945	GAAATCCCTCAAACTCTGACTGAAATGTACATCCACTTCCTGCTGATTCAGATCAACATGAGGAATCAGAAGTATGAAGAGAGAGATCCAGAGAATCTCCTGCAGTCCAACAGAGAAGTG
1:57362402-57364204_1008	AATCAGAAGTATGAAGAGAGAGATCCAGAGAATCTCCTGCAGTCCAACAGAGAAGTGATTGTCAAACTTGCTGAAGTGGCTTTCAGACAGCTGATGAAGGGCAATGTGATGTTCTATGAG
1:57362402-57364204_1071	AAACTTGCTGAAGTGGCTTTCAGACAGCTGATGAAGGGCAATGTGATGTTCTATGAGGAGGACCTGATTGAGAGCGGCGTAAACGTCTCTGACACCTCAGTGTATTCTGGGATTTGCACT
1:57362402-57364204_1134	CTGATTGAGAGCGGCGTAAACGTCTCTGACACCTCAGTGTATTCTGGGATTTGCACTGAGATCTTTAAGGAGGAATCTGTGATTCAGCAGAGGAAAGTCTACAGCTTTATCCATCTGAGC
1:57362402-57364204_1197	TTTAAGGAGGAATCTGTGATTCAGCAGAGGAAAGTCTACAGCTTTATCCATCTGAGCGTTCAGGAGTTTCTGGCTGCTTTCCATGTGTTTCAACTTTATGTGATGCAGAATATGGACACA
1:57362402-57364204_1260	GAGTTTCTGGCTGCTTTCCATGTGTTTCAACTTTATGTGATGCAGAATATGGACACATCTCGTTTTTTAGATGTAATTCATAGTCTGCATAAGGAAGCAGTAGATAAAGCCACTGAAAGT
1:57366636-57367168_0	TGCGCTTCATCTCACACTGGATTCCAACACCGCACACAATAAACTCATCCTGTCTGAGGAGAACAGAAAAATCACATTTGTGGAAGAGTGTCAGCCGTATCCTGAACATCCAGAGAGGTT
1:57366636-57367168_59	AGAACAGAAAAATCACATTTGTGGAAGAGTGTCAGCCGTATCCTGAACATCCAGAGAGGTTTGCGCACCATCCTCAGATTCTGAGTCGAGAGAAGCTGACTGGACGCTGTTACTGGGAGG
1:57366636-57367168_118	TTTGCGCACCATCCTCAGATTCTGAGTCGAGAGAAGCTGACTGGACGCTGTTACTGGGAGGTTGAACGGAGTGGCGCTAGTGTTGATATTGCAGTGGCTTATAAGGAAATCACCAAAAAA
1:57366636-57367168_177	GGTTGAACGGAGTGGCGCTAGTGTTGATATTGCAGTGGCTTATAAGGAAATCACCAAAAAAGATGGGAGTGACTCTTGGTTTGGGTACAATGATAAATCCTGGAGTCTCTACTGGTATAC
1:57366636-57367168_236	AAGATGGGAGTGACTCTTGGTTTGGGTACAATGATAAATCCTGGAGTCTCTACTGGTATACTAATGGATTCACTGCATGGCATATAAATGAGAGCCATCCCATACCAGCTCTTTCAGCAC
1:57366636-57367168_295	ACTAATGGATTCACTGCATGGCATATAAATGAGAGCCATCCCATACCAGCTCTTTCAGCACAATCTAATAGAGTAGGAGTGTATGTGGACGTGCCGTCCGGCTCTCTGTCCTTCTACAGT
1:57366636-57367168_354	ACAATCTAATAGAGTAGGAGTGTATGTGGACGTGCCGTCCGGCTCTCTGTCCTTCTACAGTGTCTCTGACACACACACACTCACACACTTACACACATTCAACACCACATTCACTGAACC
1:57366636-57367168_412	AGTGTCTCTGACACACACACACTCACACACTTACACACATTCAACACCACATTCACTGAACCCCTCTATGCTGCATTGAGAGCTTATCCTCAATCCTCTGTGTCTCTGTGTCAGATTTAA
1:57375877-57376153_0	TTCCAGAAGTTTCGACTCGAGGCGATTTGCACGTTCGTTCTGCTTGATGCTGCGCAGTGCCTGTACAGCGATTTTCCCAGCATCCATGCTGTAATGCTGCACCATATAGTCCACCACATC
1:57375877-57376153_52	CGCAGTGCCTGTACAGCGATTTTCCCAGCATCCATGCTGTAATGCTGCACCATATAGTCCACCACATCCTGACGGTCCTTATTCTCCAGCTTTCCCCGAGGAATGGCTTCGACGCCTTTT
1:57375877-57376153_104	TATAGTCCACCACATCCTGACGGTCCTTATTCTCCAGCTTTCCCCGAGGAATGGCTTCGACGCCTTTTTTCACACCCATCCACAGCTGCCTTTTGAACTCTTTGAGCTCTGACTCCACAA
1:57375877-57376153_156	GGCTTCGACGCCTTTTTTCACACCCATCCACAGCTGCCTTTTGAACTCTTTGAGCTCTGACTCCACAAGTTCCTCGAGCACATCAGTTATCAACTTGGTAATATCCTCCATTTTCTGTTA
1:57385042-57386949_0	ATTAGCAAGACAATAAATCAAAGATCAGCGTCTCCAGAGTTCAGCGTTCTGTCAATGACGAGTAACAGATCCATCGGGCAACCTGAAAACTTCAGTGATGAACCAGTGACATTTGACTCA
1:57385042-57386949_62	TAACAGATCCATCGGGCAACCTGAAAACTTCAGTGATGAACCAGTGACATTTGACTCAGTGCTGAGTGATGCATTGGACAAACCAGATTATGAGAAATTACACCGAATTAAAGACCAGCA
1:57385042-57386949_124	TGAGTGATGCATTGGACAAACCAGATTATGAGAAATTACACCGAATTAAAGACCAGCACAAAACCAGCATGAAAAACAAATATGAGAGATTATTTGAGGGACTCAAACTAGATGAGACTG
1:57385042-57386949_186	ACCAGCATGAAAAACAAATATGAGAGATTATTTGAGGGACTCAAACTAGATGAGACTGGAACCCACCTGAACCGGATCTACACCCAGCTGTACATCCTAGAGGGAGAGAGTGAAGGAGTG
1:57385042-57386949_248	CCACCTGAACCGGATCTACACCCAGCTGTACATCCTAGAGGGAGAGAGTGAAGGAGTGAATGAAGAACATGAGGTTTTACAGATGGAGAAAACAGCCAGAACAAAACACTCCCAACACAC
1:57385042-57386949_310	AAGAACATGAGGTTTTACAGATGGAGAAAACAGCCAGAACAAAACACTCCCAACACACTCCAATCTACTGCAATGACATCTTTAAAGAGGAGAAAGAGCAAATCAAGACTGTTCTTACTA
1:57385042-57386949_372	ATCTACTGCAATGACATCTTTAAAGAGGAGAAAGAGCAAATCAAGACTGTTCTTACTAAAGGCATCGCTGGAATCGGAAAAACCGTCTCTGTGCAGAAGTTCATTCTGGACTGGGCCGAG
1:57385042-57386949_434	CATCGCTGGAATCGGAAAAACCGTCTCTGTGCAGAAGTTCATTCTGGACTGGGCCGAGGGAAAAGCCAATCAGGATGTAGATTTCATGTTTGTGCTTCCATTTCGAGAGCTGAACTTGAT
1:57385042-57386949_496	AAGCCAATCAGGATGTAGATTTCATGTTTGTGCTTCCATTTCGAGAGCTGAACTTGATCAGAGATCATCAGTACAGTCTTCACAGACTTCTGCTGGACTTTCATCCTGAACTTGAAGATC
1:57385042-57386949_558	GATCATCAGTACAGTCTTCACAGACTTCTGCTGGACTTTCATCCTGAACTTGAAGATCTGGAGCCCAAGATTTATGAGGAGTGTAAAGTTGTGTTCATCTTTGATGGTCTGGATGAAAGC
1:57385042-57386949_620	GCCCAAGATTTATGAGGAGTGTAAAGTTGTGTTCATCTTTGATGGTCTGGATGAAAGCAGAATCACACTGATGTTTTCAGACGCTCAGAAAGTTTGTGATGTGACTGAGACTTCATCAGT
1:57385042-57386949_682	TCACACTGATGTTTTCAGACGCTCAGAAAGTTTGTGATGTGACTGAGACTTCATCAGTGGCTGTGTTGATGTCAAAGCTGATGAAAGGAGAGCTGCTTCCCTCTGCTCTCATCTGGATCA
1:57385042-57386949_744	GTGTTGATGTCAAAGCTGATGAAAGGAGAGCTGCTTCCCTCTGCTCTCATCTGGATCACCTCCAGACCAGCAGCAGCCAATCAGATCCCCTCCAAATACATCAAGCGTCTGACAGAAATT
1:57385042-57386949_806	CAGACCAGCAGCAGCCAATCAGATCCCCTCCAAATACATCAAGCGTCTGACAGAAATTCAGGGATTCACTGAGCCTCAGAAGGAGGAATATTTCAGGAAGAGAATCAGTGAGCAGCATCG
1:57385042-57386949_868	GATTCACTGAGCCTCAGAAGGAGGAATATTTCAGGAAGAGAATCAGTGAGCAGCATCGAGCCAGCAGAATCATCTCACACATCAGAAGAGCAAGAAGCCTCCACATCATGTGCCACATAC
1:57385042-57386949_930	AGCAGAATCATCTCACACATCAGAAGAGCAAGAAGCCTCCACATCATGTGCCACATACCCGTCTTCTGCTGGATCTCATCCACTGTGCTTCAGAAGCTCCTGGAAGAAGATCTGAGTGCA
1:57385042-57386949_992	CTTCTGCTGGATCTCATCCACTGTGCTTCAGAAGCTCCTGGAAGAAGATCTGAGTGCAGAAATCCCTCAAACTCTGACTGAAATGTACATCCACTTCCTGCTGATTCAGATCAACATGAG
1:57385042-57386949_1054	TCCCTCAAACTCTGACTGAAATGTACATCCACTTCCTGCTGATTCAGATCAACATGAGGAATCAGAAGTATGAAGAGAGAGATCCAGAGAAACTCCTGCAGTCCAACAGAGAAGTGATTG
1:57385042-57386949_1116	CAGAAGTATGAAGAGAGAGATCCAGAGAAACTCCTGCAGTCCAACAGAGAAGTGATTGTCAAACTTGCTGAAGTGGCTTTCAGACAGCTGATGAAGGGCAATGTGATGTTCTATGAGGAG
1:57385042-57386949_1178	ACTTGCTGAAGTGGCTTTCAGACAGCTGATGAAGGGCAATGTGATGTTCTATGAGGAGGACCTGATTGAGAGCGGCGTAGACGTCTCTGACGCCTCAGTGTATTCTGGGATTTGCACTGA
1:57385042-57386949_1240	TGATTGAGAGCGGCGTAGACGTCTCTGACGCCTCAGTGTATTCTGGGATTTGCACTGAGATCTTTAAGGAGGAATCTGTGATTCAGCAGAGGAAAGTCTACAGCTTCATCCATCTGAGCG
1:57385042-57386949_1302	TTTAAGGAGGAATCTGTGATTCAGCAGAGGAAAGTCTACAGCTTCATCCATCTGAGCGTTCAGGAGTTCCTCGCTGCTTTCCATGTGTTTTACTACCATGTGAACACAACTATGGATGGA
1:57385042-57386949_1364	GGAGTTCCTCGCTGCTTTCCATGTGTTTTACTACCATGTGAACACAACTATGGATGGACTGAGGAATTTTGCCTCAGTAGAAAACCTGATTAAAGGTGCAGTAGATAAAGCCATTGAGAG
1:57395250-57395779_0	TGCATGTTTTCTGACACTGGATCCAAACACAGCACACAATCAACTCATCCTGTCTGAGGATAAAAGAAAGGTGACACATGTCAAAGACCCTCAGCAATATACTGATTATCCTGAGAAATT
1:57395250-57395779_59	ATAAAAGAAAGGTGACACATGTCAAAGACCCTCAGCAATATACTGATTATCCTGAGAAATTTGTGCACCAAGAGCAGGTTCTGTGTAAAGAGACTCTGACTGGACGCTGTTACTGGGAGG
1:57395250-57395779_118	TTTGTGCACCAAGAGCAGGTTCTGTGTAAAGAGACTCTGACTGGACGCTGTTACTGGGAGGTTGAATGGAGTGGTGAGGGCACTGATATAGCCGTGGCCTATAAAGGAATTCGGAGGAAA
1:57395250-57395779_177	GGTTGAATGGAGTGGTGAGGGCACTGATATAGCCGTGGCCTATAAAGGAATTCGGAGGAAAGCAGGAAGTGACTGTTGGTTTGGATACAGTGAAAAGTCCTGGAGTCTCTTCTACACTGG
1:57395250-57395779_236	AAGCAGGAAGTGACTGTTGGTTTGGATACAGTGAAAAGTCCTGGAGTCTCTTCTACACTGGCAATGGGTTCAATGTCTGGCACAATAATAAGAGCCAAATCATACCAGCCCCTTCACCTC
1:57395250-57395779_295	GGCAATGGGTTCAATGTCTGGCACAATAATAAGAGCCAAATCATACCAGCCCCTTCACCTCTGTCTAATAGAGTAGGAGTGTATCTGGACACTGAGTCTGGCTCTCTGTCCTTCTACAGT
1:57395250-57395779_354	TCTGTCTAATAGAGTAGGAGTGTATCTGGACACTGAGTCTGGCTCTCTGTCCTTCTACAGTGTCTCTGACACACACACACTCACACACTTACACACATTCAACACCACATTCACTGAACC
1:57395250-57395779_409	TACAGTGTCTCTGACACACACACACTCACACACTTACACACATTCAACACCACATTCACTGAACCCCTCTATGCTGGATTCAGAGTGTTTGATTCCTCACTGTCTTTGTGCAACATTTAG
1:57404101-57405951_0	AGAAAAAAGATACGTAAGCTGATCACACCAGTTCCAAACTCAACACCCAACTATCAGACTCCCATTATACAGGACAACACTGATGCACACATGCTAGAGACTGGAGACCTGCAGAGAGTC
1:57404101-57405951_62	CATTATACAGGACAACACTGATGCACACATGCTAGAGACTGGAGACCTGCAGAGAGTCAAAGACCAGCACAAAACCAACATGAAGAATAAATATGAGAGATTATTTGAGGGAATCAAACT
1:57404101-57405951_124	ACCAGCACAAAACCAACATGAAGAATAAATATGAGAGATTATTTGAGGGAATCAAACTCCAAGAGAATCAAACCCTCCTGAACCGCATCTACACCCAGCTGTACATCATAGAGGGAGAGA
1:57404101-57405951_186	GAGAATCAAACCCTCCTGAACCGCATCTACACCCAGCTGTACATCATAGAGGGAGAGAGTGAAGGAGTGAATGAAGAACATGAGGTTTTACAGATGGAGAAAACAGCCAGAACAAAACAC
1:57404101-57405951_248	AGGAGTGAATGAAGAACATGAGGTTTTACAGATGGAGAAAACAGCCAGAACAAAACACTCCCAACACACTCCAATCTACTGCAATGACATCTTTAAAGAGGAGAAAGAGCAAATCAAGAC
1:57404101-57405951_310	AACACACTCCAATCTACTGCAATGACATCTTTAAAGAGGAGAAAGAGCAAATCAAGACTGTTCTTACTAAAGGCATCGCTGGAATCGGAAAAACCGTCTCTGTGCAGAAGTTCATTCTGG
1:57404101-57405951_372	CTTACTAAAGGCATCGCTGGAATCGGAAAAACCGTCTCTGTGCAGAAGTTCATTCTGGACTGGGCCGAGGGAAAAGCCAATCAGGATGTAGATTTCATGTTTGTGCTTCCATTTCGAGAG
1:57404101-57405951_434	GGCCGAGGGAAAAGCCAATCAGGATGTAGATTTCATGTTTGTGCTTCCATTTCGAGAGCTGAACTTGATCAGAGATCATCAGTACAGTCTTCACAGACTTCTGCTGGACTTTCATCCTGA
1:57404101-57405951_496	ACTTGATCAGAGATCATCAGTACAGTCTTCACAGACTTCTGCTGGACTTTCATCCTGAACTTGAAGATCTGGAGCCCAAGATTTATGAGGAGTGTAAAGTTGTGTTCATCTTTGATGGTC
1:57404101-57405951_558	GAAGATCTGGAGCCCAAGATTTATGAGGAGTGTAAAGTTGTGTTCATCTTTGATGGTCTGGATGAAAGCAGAATCACACTGATGTTTTCAGACGCTCAGAAAGTTTGTGATGTGACTGAG
1:57404101-57405951_620	TGAAAGCAGAATCACACTGATGTTTTCAGACGCTCAGAAAGTTTGTGATGTGACTGAGACTTCATCAGTGGCTGTGTTGATGTCAAAGCTGATGAAAGGAGAGCTGCTTCCCTCTGCTCT
1:57404101-57405951_682	CATCAGTGGCTGTGTTGATGTCAAAGCTGATGAAAGGAGAGCTGCTTCCCTCTGCTCTCATCTGGATCACCTCCAGACCAGCAGCAGCCAATCAGATCCCCTCCAAATACATCAAGCGTC
1:57404101-57405951_744	TGGATCACCTCCAGACCAGCAGCAGCCAATCAGATCCCCTCCAAATACATCAAGCGTCTGACAGAAATTCAGGGATTCACTGAGCCTCAGAAGGAGGAATATTTCAGGAAGAGAATCAGT
1:57404101-57405951_806	AGAAATTCAGGGATTCACTGAGCCTCAGAAGGAGGAATATTTCAGGAAGAGAATCAGTGAGCAGCATCAAGCCAGCAGAATCATCTCACACATCAGAAGAGCAAGAAGCCTCCACATCAT
1:57404101-57405951_868	AGCATCAAGCCAGCAGAATCATCTCACACATCAGAAGAGCAAGAAGCCTCCACATCATGTGCCACATACCCGTCTTCTGCTGGATCTCATCCACTGTGCTTCAGAAGCTTCTGGAAGAAG
1:57404101-57405951_930	CACATACCCGTCTTCTGCTGGATCTCATCCACTGTGCTTCAGAAGCTTCTGGAAGAAGATCTGAGTGCAGAAATCCCTCAAACTCTGACTGAAATGTACATCCACTTCCTGCTGATTCAG
1:57404101-57405951_992	GAGTGCAGAAATCCCTCAAACTCTGACTGAAATGTACATCCACTTCCTGCTGATTCAGATCAACATGAGGAATCAGAAGTATGAAGAGAGAGATCCAGAGAAACTCCTGCAGTCCAACAG
1:57404101-57405951_1054	ACATGAGGAATCAGAAGTATGAAGAGAGAGATCCAGAGAAACTCCTGCAGTCCAACAGAGAAGTGATTGTCAAACTTGCTGAAGTGGCTTTCAGACAGCTGATGAAGGGCAATGTGATGT
1:57404101-57405951_1116	GTGATTGTCAAACTTGCTGAAGTGGCTTTCAGACAGCTGATGAAGGGCAATGTGATGTTCTATGAGGAGGACCTGATTGAGAGCGGCGTAAATGTCACTTATGCCTCAGTGTATTCTGGG
1:57404101-57405951_1178	TGAGGAGGACCTGATTGAGAGCGGCGTAAATGTCACTTATGCCTCAGTGTATTCTGGGATTTGCACTGAGATCTTAAGGGAAGAATCTGTGTATCAGCAGAGGAAAGTCTACAGCTTCAT
1:57404101-57405951_1240	GCACTGAGATCTTAAGGGAAGAATCTGTGTATCAGCAGAGGAAAGTCTACAGCTTCATCCATCTGAGTGTTCAGGAGTTCCTCGCTGCTTTCTATGTGTTTTACCACAACATAAGCAACA
1:57404101-57405951_1302	CTGAGTGTTCAGGAGTTCCTCGCTGCTTTCTATGTGTTTTACCACAACATAAGCAACACCACAGAGGCATGTTTAGATTCACTGCATGATTTACAGAGAAGAGCAGTAGATAAAGCCACT
1:57404101-57405951_1364	AGAGGCATGTTTAGATTCACTGCATGATTTACAGAGAAGAGCAGTAGATAAAGCCACTGAGGGTAAGAGTGGTCATCTGGATCTGTTCCTGCGGTTCCTGCTGGGCGTCTCACTGGAGTC
1:57409151-57409683_0	TGCTTGTCGCCTCTCACTGGATCCAAATACTACACATAGTCGTCTCATCTTGTCTGAAGGGAACAGAAGAACATCACGTGTGAAAGATCATCAAATTTATCCTGATTATCCAGAGAGATT
1:57409151-57409683_59	GGAACAGAAGAACATCACGTGTGAAAGATCATCAAATTTATCCTGATTATCCAGAGAGATTCGAGCACTATGAGCAGGTTCTGTGTAAAGAGACTCTGACTGGACGCTGTTACTGGGAGG
1:57409151-57409683_118	TTCGAGCACTATGAGCAGGTTCTGTGTAAAGAGACTCTGACTGGACGCTGTTACTGGGAGGCTGAATGGAGCGGCTGGGGTCATGTTGCATTGTCATATAAAGGAATCTGCAGGAAAGGA
1:57409151-57409683_177	GGCTGAATGGAGCGGCTGGGGTCATGTTGCATTGTCATATAAAGGAATCTGCAGGAAAGGAGGAAGCGACTGTCGGTTTGGACTCAATGAAAAGTCCTGGAGTCTCTATTGTTGTGATGA
1:57409151-57409683_236	GAGGAAGCGACTGTCGGTTTGGACTCAATGAAAAGTCCTGGAGTCTCTATTGTTGTGATGATAGTTACACTTTTTGGCACAAAAATAAGAGCACAAACATCCCTGCTCCATCATCTCGTA
1:57409151-57409683_295	GATAGTTACACTTTTTGGCACAAAAATAAGAGCACAAACATCCCTGCTCCATCATCTCGTACTAATAGAGTAGGAGTGTATGTGGACGTGCCGTCCGGTTCTATGTCTTTCTACAGCATC
1:57409151-57409683_354	TACTAATAGAGTAGGAGTGTATGTGGACGTGCCGTCCGGTTCTATGTCTTTCTACAGCATCTCTGACACAAACACACTCACACACTTACACACATTCAACACCACATTCACTGAAGACCT
1:57409151-57409683_412	ATCTCTGACACAAACACACTCACACACTTACACACATTCAACACCACATTCACTGAAGACCTCTATGCAGGATTCAGAGTTCATCCTGATTCTTCAGTGACTCTGTGTGAGCTTTAAAAA
1:57412250-57412781_0	TACACACTTCTTGTGTTCAGATGCCTTTCTCACAATGGATCCAAACACAGCACACACTCCTGTCTGATGGGAACAAAACAGCATGTCTGAAAGTTCTTCAGTCGTATCCTGATCATCCAG
1:57412250-57412781_59	CTGTCTGATGGGAACAAAACAGCATGTCTGAAAGTTCTTCAGTCGTATCCTGATCATCCAGACAGGTTTAATCAACAGGAGCAGGTTCTGTGTAGAGAGACTCTGACTGGACGCTGTTAC
1:57412250-57412781_118	AGACAGGTTTAATCAACAGGAGCAGGTTCTGTGTAGAGAGACTCTGACTGGACGCTGTTACTGGGAGGCTGAATGGAGTGGATTGGTTCATGTAGCAGTGGCTTATAAGAGCATCCAGAG
1:57412250-57412781_177	ACTGGGAGGCTGAATGGAGTGGATTGGTTCATGTAGCAGTGGCTTATAAGAGCATCCAGAGGAAAGGTGGAAGTGACTGCAGGTTTGGACTCTGAAAAATGCTGAAATATTTACTGCTGT
1:57412250-57412781_236	AGGAAAGGTGGAAGTGACTGCAGGTTTGGACTCTGAAAAATGCTGAAATATTTACTGCTGTGATTCAAATTACTTTGTCTGGCACAATAATATGAGCACAAACATTCACATTTAGGATAC
1:57412250-57412781_295	GTGATTCAAATTACTTTGTCTGGCACAATAATATGAGCACAAACATTCACATTTAGGATACATGTGAATGCAGATAATGTGCATTAAGGTGTTTGGTGTTTTAAGAGGCAGGTGATTCAT
1:57412250-57412781_354	ACATGTGAATGCAGATAATGTGCATTAAGGTGTTTGGTGTTTTAAGAGGCAGGTGATTCATAGTGATGATGTACCTGTAGTGGTTTGTCTTTGTTAAGTTACTCCCATGATTTGACAAGT
1:57412250-57412781_411	TCATAGTGATGATGTACCTGTAGTGGTTTGTCTTTGTTAAGTTACTCCCATGATTTGACAAGTATGTGCTGAAAAGTTGACCATCAGTTTAGTTATGGAAGGCAGAAGCTCTAATGAGGA
1:57415428-57417266_0	AGGAAAAAGACACATAAACCCATTACATCCAACTATCAGACTCACATTATACAGGACAATACTGAAGCACACACACTGGAGACTGGAGACCTACAGAGAGTCAAAGACCAGCACAAAACC
1:57415428-57417266_62	TGAAGCACACACACTGGAGACTGGAGACCTACAGAGAGTCAAAGACCAGCACAAAACCAGCATGAAGAACAAATATGAGAGACTATTTGAGGGAAACAAACTACAAGAAACCCAAACCCT
1:57415428-57417266_124	TGAAGAACAAATATGAGAGACTATTTGAGGGAAACAAACTACAAGAAACCCAAACCCTCCTGAACCGTATCTACACCCAGCTGTACATCCTAGAGGGAGAGAGTGAAGGAGTGAATGAAG
1:57415428-57417266_186	AACCGTATCTACACCCAGCTGTACATCCTAGAGGGAGAGAGTGAAGGAGTGAATGAAGAACATGAGGTTTTACAGATGGAGAAAACAGCCAGAACAAAACACTCCCAACACACTCCAATC
1:57415428-57417266_248	TGAGGTTTTACAGATGGAGAAAACAGCCAGAACAAAACACTCCCAACACACTCCAATCTACTGCAATGACATCTTTAAAGAGGAGAAAGAGCAAATCAAAACTGTTCTTACTAAAGGCAT
1:57415428-57417266_310	GCAATGACATCTTTAAAGAGGAGAAAGAGCAAATCAAAACTGTTCTTACTAAAGGCATCGCTGGAATCGGAAAAACCGTCTCTGTGCAGAAGTTCATTCTGGACTGGGCCGAGGGAAAAG
1:57415428-57417266_372	GGAATCGGAAAAACCGTCTCTGTGCAGAAGTTCATTCTGGACTGGGCCGAGGGAAAAGCCAATCAGGATGTAGATTTCATGTTTGTGCTTCCATTTCGAGAGCTGAACTTGATCAGAGAT
1:57415428-57417266_434	TCAGGATGTAGATTTCATGTTTGTGCTTCCATTTCGAGAGCTGAACTTGATCAGAGATCATCAGTACAGTCTTCACACACTTCTGCTGGACTTTCATCCTGAACTTGAAGATCTGGAGCC
1:57415428-57417266_496	AGTACAGTCTTCACACACTTCTGCTGGACTTTCATCCTGAACTTGAAGATCTGGAGCCCAAGATTTATGAGGAGTGTAAAGTTGTGTTCATCTTTGATGGTCTGGATGAAAGCAGAATCA
1:57415428-57417266_558	ATTTATGAGGAGTGTAAAGTTGTGTTCATCTTTGATGGTCTGGATGAAAGCAGAATCACACTGATGTTTTCAGACGCTCAGAAAGTTTGTGATGTGACTGAGACTTCATCAGTGGCTGTG
1:57415428-57417266_620	GATGTTTTCAGACGCTCAGAAAGTTTGTGATGTGACTGAGACTTCATCAGTGGCTGTGTTGATGTCAAAGCTGATGAAAGGAGAGCTGCTTCCCTCTGCTCTCATCTGGATCACCTCCAG
1:57415428-57417266_682	TGTCAAAGCTGATGAAAGGAGAGCTGCTTCCCTCTGCTCTCATCTGGATCACCTCCAGACCAGCAGCAGCCAATCAGATCCCCTCCAAATACATCAAGCGTCTGACAGAAATTCAGGGAT
1:57415428-57417266_744	GCAGCAGCCAATCAGATCCCCTCCAAATACATCAAGCGTCTGACAGAAATTCAGGGATTCACTGAGCCTCAGAAGGAGGAATATTTCAGGAAGAGAATCAGTGAGCAGCATCAAGCCAGC
1:57415428-57417266_806	TGAGCCTCAGAAGGAGGAATATTTCAGGAAGAGAATCAGTGAGCAGCATCAAGCCAGCAGAATCATCTCACACATCAGAAGAGCAAGAAGCCTCCACATCATGTGCCACATACCCGTCTT
1:57415428-57417266_868	TCATCTCACACATCAGAAGAGCAAGAAGCCTCCACATCATGTGCCACATACCCGTCTTCTGCTGGATCTCATCCACTGTGCTTCAGAAGCTCCTGGAAGAAGATCTGAGTGCAGAAATCC
1:57415428-57417266_930	TGGATCTCATCCACTGTGCTTCAGAAGCTCCTGGAAGAAGATCTGAGTGCAGAAATCCCTCAAACTCTGACTGAAATGTACATCCACTTCCTGCTGATTCAGATCAACATGAGGAATCAG
1:57415428-57417266_992	AACTCTGACTGAAATGTACATCCACTTCCTGCTGATTCAGATCAACATGAGGAATCAGAAGTATGAAGAGAGAGATCCAGAGAAACTCCTGCAGTCCAACAGAGAAGTGATTGTCAAACT
1:57415428-57417266_1054	ATGAAGAGAGAGATCCAGAGAAACTCCTGCAGTCCAACAGAGAAGTGATTGTCAAACTTGCTGAAGTGGCTTTCAGACAGCTGATGAAGGGCAATGTGATGTTCTATGAGGAGGACCTGA
1:57415428-57417266_1116	GAAGTGGCTTTCAGACAGCTGATGAAGGGCAATGTGATGTTCTATGAGGAGGACCTGATTGAGAGCGGCGTAGACGTCTCTGACGCCTCAGTGTATTCTGGGATTTGCACTGAGATCTTT
1:57415428-57417266_1178	GAGCGGCGTAGACGTCTCTGACGCCTCAGTGTATTCTGGGATTTGCACTGAGATCTTTAAGGAGGAATCTGTGATTCAGCAGAGGAAAGTCTACAGCTTCATCCATCTGAGTGTTCAGGA
1:57415428-57417266_1240	AGGAATCTGTGATTCAGCAGAGGAAAGTCTACAGCTTCATCCATCTGAGTGTTCAGGAGTTCCTCGCTGCTTTCTATGTGTTTTATTATTATGTAATGAAAAATGTGGACACGTTGCAAT
1:57415428-57417266_1302	CTCGCTGCTTTCTATGTGTTTTATTATTATGTAATGAAAAATGTGGACACGTTGCAATTTTGTGATGTGATGCATGATCTGCATAAGAATGCAGTAGATAAAGCCATTGAGAGTGAGAAT
1:57419764-57420293_0	TGCCTGTTTACTCACACTGGATCCAAACACGGCTCACACTCAACTCCAGCTGTCTGAGGAGAACAGAAAAGCAACACGAGGTGAACACAGTCAGCCGTATCTTGATCATCCAGACAGATT
1:57419764-57420293_59	AGAACAGAAAAGCAACACGAGGTGAACACAGTCAGCCGTATCTTGATCATCCAGACAGATTTGAGAACATTGAGCAGGTTCTGTGTAAAGCGACTCTGACTGGACGCTGTTACTGGGAGT
1:57419764-57420293_118	TTTGAGAACATTGAGCAGGTTCTGTGTAAAGCGACTCTGACTGGACGCTGTTACTGGGAGTCTGAATGGAGCGGTTTGGTTCATGTAGCAGTGTCCTATAAGAGCATTGAGAGGAAAGGT
1:57419764-57420293_177	GTCTGAATGGAGCGGTTTGGTTCATGTAGCAGTGTCCTATAAGAGCATTGAGAGGAAAGGTGGGAGTGACTGCAGGTTTGGTCTCAATGATAAATCCTGGAATATTTACTGCTGTGAGTC
1:57419764-57420293_236	GTGGGAGTGACTGCAGGTTTGGTCTCAATGATAAATCCTGGAATATTTACTGCTGTGAGTCAAATTACTCTGTCTGGCACAATAATAAGAGCACAAACATTCCCACACCTTCACCACAGT
1:57419764-57420293_295	TCAAATTACTCTGTCTGGCACAATAATAAGAGCACAAACATTCCCACACCTTCACCACAGTCTAATAGAGTAGGAGTGTATGTGGACGTGCCGTCCGGCTCTCTGTCCTTCTACAGTGTC
1:57419764-57420293_354	GTCTAATAGAGTAGGAGTGTATGTGGACGTGCCGTCCGGCTCTCTGTCCTTCTACAGTGTCTCTGACACAAACACACTCACACACATACACACATTCAACACCATATTCACTGAACCCCT
1:57419764-57420293_409	AGTGTCTCTGACACAAACACACTCACACACATACACACATTCAACACCATATTCACTGAACCCCTCTATGCTGGATTTTTGGTCTATCCTGACTCCTCTGTGTCTCTGTGTCAGATTTAA
1:57426623-57428723_0	GTAATCAGGAGGAAGAGACCGAGATCAGAGTCTCCAAAGCCCAGTGGTGTTTCTCTGAAGAGTGGCAATTCTATGAATTTTCCTCCGCTATTGAGTGATGAACCAGTGACCTCTGACCCG
1:57426623-57428723_62	TGGCAATTCTATGAATTTTCCTCCGCTATTGAGTGATGAACCAGTGACCTCTGACCCGCAGTTAGTATTACTTAGTATAATATTTCTTACACACTGTAGGACAAATCAGACTAATAACTG
1:57426623-57428723_124	TAGTATTACTTAGTATAATATTTCTTACACACTGTAGGACAAATCAGACTAATAACTGTTTTTAAACAATAAACCCTTAATACACCTCAAATTGTTTACTAATTTAAAATTCCTGCTCCT
1:57426623-57428723_186	TAAACAATAAACCCTTAATACACCTCAAATTGTTTACTAATTTAAAATTCCTGCTCCTTTAAGGAGGACAAAGATACTTAAGCTGATCACACCAGTGCCAAACTCGACACCCAACTATCA
1:57426623-57428723_248	GGAGGACAAAGATACTTAAGCTGATCACACCAGTGCCAAACTCGACACCCAACTATCAGACTCACAATATACAGGACAACACTGATGCACACATGCTAGAGACTGGAGACCTGCAGAGAG
1:57426623-57428723_310	CACAATATACAGGACAACACTGATGCACACATGCTAGAGACTGGAGACCTGCAGAGAGTCAAAGACCAGCACAAAACCAGCATGAAGATCAAATATGAGAGATTATTTGAGGGAAACACA
1:57426623-57428723_372	AGACCAGCACAAAACCAGCATGAAGATCAAATATGAGAGATTATTTGAGGGAAACACACTCCAAGAGAACCAAACCCTCCTGAACCAGATCTACACCCAGCTGTACATCATAGAGGGAGA
1:57426623-57428723_434	AAGAGAACCAAACCCTCCTGAACCAGATCTACACCCAGCTGTACATCATAGAGGGAGAGAGTGAAGGAGTGAATGAAGAACATGAGGTTTTACAGATGGAGAAAACAGCCAGAACAAAAC
1:57426623-57428723_496	GAAGGAGTGAATGAAGAACATGAGGTTTTACAGATGGAGAAAACAGCCAGAACAAAACACTCCCAACACACTCCAATCTACTGCAATGACATCTTTAAAGAGGAGAAAGAGCAAATCAAG
1:57426623-57428723_558	CCAACACACTCCAATCTACTGCAATGACATCTTTAAAGAGGAGAAAGAGCAAATCAAGACTGTTCTTACTAAAGGCATCGCTGGAATCGGAAAAACCGTCTCTGTGCAGAAGTTCATTCT
1:57426623-57428723_620	TTCTTACTAAAGGCATCGCTGGAATCGGAAAAACCGTCTCTGTGCAGAAGTTCATTCTGGACTGGGCCGAGGGAAAAGCCAATCAGGATGTAGATTTCATGTTTGTGCTTCCATTTCGAG
1:57426623-57428723_682	TGGGCCGAGGGAAAAGCCAATCAGGATGTAGATTTCATGTTTGTGCTTCCATTTCGAGAGCTGAACTTGATCAGAGATCATCAGTACAGTCTTCACACACTTCTGCTGGACTTTCATCCT
1:57426623-57428723_744	GAACTTGATCAGAGATCATCAGTACAGTCTTCACACACTTCTGCTGGACTTTCATCCTGAACTTGAAGATCTGGAGCCCAAGATTTATGAGGAGTGTAAAGTTGTGTTCATCTTTGATGG
1:57426623-57428723_806	TTGAAGATCTGGAGCCCAAGATTTATGAGGAGTGTAAAGTTGTGTTCATCTTTGATGGTCTGGATGAAAGCAGAATCACACTGATGTTTTCAGACGCTCAGAAAGTTTGTGATGTGACTG
1:57426623-57428723_868	GATGAAAGCAGAATCACACTGATGTTTTCAGACGCTCAGAAAGTTTGTGATGTGACTGAGACTTCATCAGTGGCTGTGTTGATGTCAAAGCTGATGAAAGGAGAGCTGCTTCCCTCTGCT
1:57426623-57428723_930	TTCATCAGTGGCTGTGTTGATGTCAAAGCTGATGAAAGGAGAGCTGCTTCCCTCTGCTCTCATCTGGATCACCTCCAGACCAGCAGCAGCCAATCAGATCCCCTCCAAATACATCAAGCG
1:57426623-57428723_992	TCTGGATCACCTCCAGACCAGCAGCAGCCAATCAGATCCCCTCCAAATACATCAAGCGTCTGACAGAAATTCAGGGATTCACTGAGCCTCAGAAGGAGGAATATTTCAGGAAGAGAATCA
1:57426623-57428723_1054	ACAGAAATTCAGGGATTCACTGAGCCTCAGAAGGAGGAATATTTCAGGAAGAGAATCAGTGAGCAGCATCAAGCCAGCAGAATCATCTCACACATCAGAAGAGCAAGAAGCCTCCACATC
1:57426623-57428723_1116	GCAGCATCAAGCCAGCAGAATCATCTCACACATCAGAAGAGCAAGAAGCCTCCACATCATGTGCCACATACCCGTCTTCTGCTGGATCTCATCCACTGTGCTTCAGAAGCTCCTGGAAGA
1:57426623-57428723_1178	GCCACATACCCGTCTTCTGCTGGATCTCATCCACTGTGCTTCAGAAGCTCCTGGAAGAAGATCTGAGTGCAGAAATCCCTCAAACTCTGACTGAAATGTACATCCACTTCCTGCTGATTC
1:57426623-57428723_1240	CTGAGTGCAGAAATCCCTCAAACTCTGACTGAAATGTACATCCACTTCCTGCTGATTCAGATCAACATGAGGAATCAGAAGTATGAAGAGAGAGAACCAGAGAAACTCCTGCAGTCCAAC
1:57426623-57428723_1302	CAACATGAGGAATCAGAAGTATGAAGAGAGAGAACCAGAGAAACTCCTGCAGTCCAACAGAGAAGTGATTGTCAAACTTGCTGAAGTGGCTTTCAGACAGCTGATGAAGGGCAATGTGAT
1:57426623-57428723_1364	AAGTGATTGTCAAACTTGCTGAAGTGGCTTTCAGACAGCTGATGAAGGGCAATGTGATGTTCTATGAGGAGGACCTGATTGAGAGCGGCGTAGACGTCTCTGACGCCTCAGTGTATTCTG
1:57426623-57428723_1426	TATGAGGAGGACCTGATTGAGAGCGGCGTAGACGTCTCTGACGCCTCAGTGTATTCTGGGATTTGCACTGAGATCTTTAAGGAGGAATCTGTGATTCAGCAGAGGAAAGTCTACAGCTTC
1:57426623-57428723_1488	TTGCACTGAGATCTTTAAGGAGGAATCTGTGATTCAGCAGAGGAAAGTCTACAGCTTCATCCATCTGAGTGTTCAGGAGTTCCTCGCTGCTTTCTATGTGTTTTATGTTCATGTAAGCAG
1:57426623-57428723_1550	ATCTGAGTGTTCAGGAGTTCCTCGCTGCTTTCTATGTGTTTTATGTTCATGTAAGCAGCACTACAGAAGCATCTTTTGATTCACTAGAAAATCTCCATAAAAGAATCATTGATAAAGCTA
1:57437371-57437897_0	GTGTTCAGATGCCTGTTTTCTCACACTGGATCCAAACACAGCACATGATCACCTCGTGATGTCTAAGAATATAAAGGCAACATATGTGAAAGATCCTCAGCCGTATACTGATCATCCAGA
1:57437371-57437897_58	ATGTCTAAGAATATAAAGGCAACATATGTGAAAGATCCTCAGCCGTATACTGATCATCCAGAGAGATTTCAGTTCTTTGGGCAGGTGCTGTGTAGAGAGCCTCTGACTGGACGCTGTTAC
1:57437371-57437897_116	CAGAGAGATTTCAGTTCTTTGGGCAGGTGCTGTGTAGAGAGCCTCTGACTGGACGCTGTTACTGGGAGGTGAAATGGAGCGGCTCTGGTCATATAGCGGTGGCTTATAAAGTAATCAAGA
1:57437371-57437897_174	TTACTGGGAGGTGAAATGGAGCGGCTCTGGTCATATAGCGGTGGCTTATAAAGTAATCAAGAGGAAAAGTGGGCTTGACTCTTGGTTTGGACTCAATGAAAACTCCTGGAGTCTGCACTG
1:57437371-57437897_232	AAGAGGAAAAGTGGGCTTGACTCTTGGTTTGGACTCAATGAAAACTCCTGGAGTCTGCACTGCAGTGATAGAAATTACACCGCCTGGCACAACCATAAGAGCACTGATATTATTGCTCCT
1:57437371-57437897_290	ACTGCAGTGATAGAAATTACACCGCCTGGCACAACCATAAGAGCACTGATATTATTGCTCCTTCAGCTTGTATTAATAGTGTAGGAGTGTATGTGGACGTGCCGTCTGGCTCTCTGTCCT
1:57437371-57437897_348	TCCTTCAGCTTGTATTAATAGTGTAGGAGTGTATGTGGACGTGCCGTCTGGCTCTCTGTCCTTCTACAGTGTCTCTGACACACACACACTCACACACATACACACATTCAACACCACATT
1:57437371-57437897_406	TCCTTCTACAGTGTCTCTGACACACACACACTCACACACATACACACATTCAACACCACATTCACTGAAGAGCTCTATGCTGGATTTAGCGTTTATCCTGAATCTTCAGTGACTCTGTGT
1:57443551-57444074_0	TGCAGTTGAGCTTACGCTGGATCCAAACACAGCGCACAATCAACTCCAGATATCCGAGGAGAACAGGAAGATCACATATGTGGAGGAGCGTCAGGCATATCCTGATCATCCAGAGAGATT
1:57443551-57444074_58	GAGAACAGGAAGATCACATATGTGGAGGAGCGTCAGGCATATCCTGATCATCCAGAGAGATTTGAGCGCCATCCTCAGGTTCTGTGTAGAGAGATTCTGACTGGACGCTGTTACTGGGAG
1:57443551-57444074_116	GATTTGAGCGCCATCCTCAGGTTCTGTGTAGAGAGATTCTGACTGGACGCTGTTACTGGGAGGCTGAATGGAGCAGCTGGGGTCATATAGCAGTGTCGTATAAAGAAATGGCCAGAAATG
1:57443551-57444074_174	GGAGGCTGAATGGAGCAGCTGGGGTCATATAGCAGTGTCGTATAAAGAAATGGCCAGAAATGTAGTGACTGATTGTCGGTTTGGATTCAGTGATAAATCCTGGAGTCTGTTCTGCTCTGC
1:57443551-57444074_232	AATGTAGTGACTGATTGTCGGTTTGGATTCAGTGATAAATCCTGGAGTCTGTTCTGCTCTGCTAATGGATTCACTGTCTGGCACAATAATGTGAGCACTAGCTTATCTACCTCTACACCA
1:57443551-57444074_290	CTGCTAATGGATTCACTGTCTGGCACAATAATGTGAGCACTAGCTTATCTACCTCTACACCACTGTCTAATAGAGTAGGAGTGTATGTGGACGTGTCGTCCGGCTCTCTATCCTTCTACA
1:57443551-57444074_348	ACCACTGTCTAATAGAGTAGGAGTGTATGTGGACGTGTCGTCCGGCTCTCTATCCTTCTACAGTGTCTCTGATACACTCACACACTTACACACATTTAACACCACATTTACTGAAGACCT
1:57443551-57444074_403	TTCTACAGTGTCTCTGATACACTCACACACTTACACACATTTAACACCACATTTACTGAAGACCTCTACGCTGGGTTCAGAGTGTTTGATTCCTCACTCGCTCTGTGTCAGATTGAAAAA
1:57447384-57449249_0	AACAGCAAGAGAAAGGGACAGCATTTAGAGTTTAAAGAGTCCAGCTGTGTATCTGTAATGAGTAACCGATCCATCACCCCACCTGAAATGAAAAAAATTGGATTAAAATCAGAAGACAAT
1:57447384-57449249_63	AACCGATCCATCACCCCACCTGAAATGAAAAAAATTGGATTAAAATCAGAAGACAATATGTTAGAGAAAATTAAAAACAAGCACAAAACCAGCATGAAGCACAAATATGAGAGATTATTT
1:57447384-57449249_126	GAGAAAATTAAAAACAAGCACAAAACCAGCATGAAGCACAAATATGAGAGATTATTTGAAGGAGTCAAACTCCATGAGAATCAAACCCTGCTGAACCGGATCTACACCCAGCTGTACATC
1:57447384-57449249_189	GTCAAACTCCATGAGAATCAAACCCTGCTGAACCGGATCTACACCCAGCTGTACATCCTAGAGGGAGAGAGTGAAGGAGTGAATGAAGAACATGAGGTTTTACAGATGGAGAAAACAGCC
1:57447384-57449249_252	GGAGAGAGTGAAGGAGTGAATGAAGAACATGAGGTTTTACAGATGGAGAAAACAGCCAGAACAAAACACTCCCAACACACTCCAATCTACTGCAATGACATCTTTAAAGAGGAGAAAGAG
1:57447384-57449249_315	AAACACTCCCAACACACTCCAATCTACTGCAATGACATCTTTAAAGAGGAGAAAGAGCAAATCAAGACTGTTCTTACTAAAGGCATCGCTGGAATCGGAAAAACCGTCTCTGTGCAGAAG
1:57447384-57449249_378	AAGACTGTTCTTACTAAAGGCATCGCTGGAATCGGAAAAACCGTCTCTGTGCAGAAGTTCATTCTGGACTGGGCCGAGGGAAAAGCCAATCAGGATGTAGATTTCATGTTTGTGCTTCCA
1:57447384-57449249_441	CTGGACTGGGCCGAGGGAAAAGCCAATCAGGATGTAGATTTCATGTTTGTGCTTCCATTTCGAGAGCTGAACTTGATCAGAGATCATCAGTACAGTCTTCACACACTTCTGCTGGACTTT
1:57447384-57449249_504	GAGCTGAACTTGATCAGAGATCATCAGTACAGTCTTCACACACTTCTGCTGGACTTTCATCCTGAACTTGAAGATCTGGAGCCCAAGATTTATGAGGAGTGTAAAGTTGTGTTCATCTTT
1:57447384-57449249_567	GAACTTGAAGATCTGGAGCCCAAGATTTATGAGGAGTGTAAAGTTGTGTTCATCTTTGATGGTCTGGATGAAAGCAGAATCACACTGATGTTTTCAGACGCTCAGAAAGTTTGTGATGTG
1:57447384-57449249_630	CTGGATGAAAGCAGAATCACACTGATGTTTTCAGACGCTCAGAAAGTTTGTGATGTGACTGAGACTTCATCAGTGGCTGTGTTGATGTCAAAGCTGATGAAAGGAGAGCTGCTTCCCTCT
1:57447384-57449249_693	ACTTCATCAGTGGCTGTGTTGATGTCAAAGCTGATGAAAGGAGAGCTGCTTCCCTCTGCTCTCATCTGGATCACCTCCAGACCAGCAGCAGCCAATCAGATCCCCTCCAAATACATCAAG
1:57447384-57449249_756	ATCTGGATCACCTCCAGACCAGCAGCAGCCAATCAGATCCCCTCCAAATACATCAAGCGTCTGACAGAAATTCAGGGATTCACTGAGCCTCAGAAGGAGGAATATTTCAGGAAGAGAATC
1:57447384-57449249_819	ACAGAAATTCAGGGATTCACTGAGCCTCAGAAGGAGGAATATTTCAGGAAGAGAATCAGTGAGCAGCATCAAGCCAGCAGAATCATCTCACACATCAGAAGAGCAAGAAGCCTCCACATC
1:57447384-57449249_882	CAGCATCAAGCCAGCAGAATCATCTCACACATCAGAAGAGCAAGAAGCCTCCACATCATGTGCCACATACCCGTCTTCTGCTGGATCTCATCCACTGTGCTTCAGAAGCTCCTGGAAGAA
1:57447384-57449249_945	CACATACCCGTCTTCTGCTGGATCTCATCCACTGTGCTTCAGAAGCTCCTGGAAGAAGATCTGAGTGCAGAAATCCCTCAAACTCTGACTGAAATGTACATCCACTTCCTGCTGATTCAG
1:57447384-57449249_1008	AGTGCAGAAATCCCTCAAACTCTGACTGAAATGTACATCCACTTCCTGCTGATTCAGATCAACATGAGGAATCAGAAGTATGAAGAGAGAGATCCAGAGAAACTCCTGCAGTCCAACAGA
1:57447384-57449249_1071	ATGAGGAATCAGAAGTATGAAGAGAGAGATCCAGAGAAACTCCTGCAGTCCAACAGAGAAGTGATTGTCAAACTTGCTGAAGTGGCTTTCAGACAGCTGATGAAGGGCAATGTGATGTTC
1:57447384-57449249_1134	ATTGTCAAACTTGCTGAAGTGGCTTTCAGACAGCTGATGAAGGGCAATGTGATGTTCTATGAGGAGGACCTGATTGAGAGCGGCGTAGGCGTCTCTGACGCCTCAGTGTATTCTGGGATT
1:57447384-57449249_1197	GAGGACCTGATTGAGAGCGGCGTAGGCGTCTCTGACGCCTCAGTGTATTCTGGGATTTGCACTGAGATCTTTAAGGAGGAATCTGTGATTCAGCAGAGGAAAGTTTACAGCTTCACCCAT
1:57447384-57449249_1260	GAGATCTTTAAGGAGGAATCTGTGATTCAGCAGAGGAAAGTTTACAGCTTCACCCATCTCAGCATTCAGGAGTTCCTCGCTGCTTTCTATGTGTTTTACTACCACATAACCTGCTCCACA
1:57447384-57449249_1323	ATTCAGGAGTTCCTCGCTGCTTTCTATGTGTTTTACTACCACATAACCTGCTCCACAGAGGCATGTTTTGATTCACTGCATGATTTACAAAGAAGAGCAGTAGATAAAGCCATTGAGAGT
1:57450940-57451460_0	TGCCTGTTTTCTCACACTGGATCCAATCACAGCACATACTCAGCTCCAGCTGTCTGAGGAGAACAGGAAAGCAAGTATTGTGACAGATCCTCAGCCGTATCCTGATCATCCAGACAGATT
1:57450940-57451460_58	GAGAACAGGAAAGCAAGTATTGTGACAGATCCTCAGCCGTATCCTGATCATCCAGACAGATTTGATCAACAGGAGCAGGTTCTGTGTAGAGAGACTCTGACTGGACGCTGTTACTGGGAG
1:57450940-57451460_116	GATTTGATCAACAGGAGCAGGTTCTGTGTAGAGAGACTCTGACTGGACGCTGTTACTGGGAGGTAAAATGGAGCGGCTCTGGTCTTGTAGCGGTGGCGTATAAAGGAATTGGCAGGAAAA
1:57450940-57451460_174	GGAGGTAAAATGGAGCGGCTCTGGTCTTGTAGCGGTGGCGTATAAAGGAATTGGCAGGAAAAGTGGATTTGACTGTTGTTTTGGACATAATGAACACTCCTGGTGTCTGTACTGCAGTGA
1:57450940-57451460_232	AAAAGTGGATTTGACTGTTGTTTTGGACATAATGAACACTCCTGGTGTCTGTACTGCAGTGATGAGGTTTACTCTGTCTGGGACAATAATAAGAGCGTTGATGTATTTGGTCCTTCATCT
1:57450940-57451460_290	GTGATGAGGTTTACTCTGTCTGGGACAATAATAAGAGCGTTGATGTATTTGGTCCTTCATCTCGTACTAATAGAGTGGGAGTGTATGTGGACGTGCCGTCCGGCTGTCTGTCTTTCTACA
1:57450940-57451460_348	ATCTCGTACTAATAGAGTGGGAGTGTATGTGGACGTGCCGTCCGGCTGTCTGTCTTTCTACAGTGTCTCTGACACAAACACACTCACACACATACACACATTCAACACCACATTCACTGA
1:57450940-57451460_400	TCTTTCTACAGTGTCTCTGACACAAACACACTCACACACATACACACATTCAACACCACATTCACTGAAGAGCTCTATGCTGGATTTAAGGTTTATCCTGGATCTTCGGTGTCTCTGTGT
1:57458586-57460321_0	GAATTAAAAATCAGCACAAAACCAGCCTGAAAAATAAGTATGAGAGATTATTTGAAGGAATCGAAGTAAAAGAGACTGGAACCCACCTGAACCGGATCTACACCCAGCTGTACATCATAG
1:57458586-57460321_63	AAGTAAAAGAGACTGGAACCCACCTGAACCGGATCTACACCCAGCTGTACATCATAGAGGGAGAGAGTGAAGGAGTGAATGAAGAACATGAGGTTTTACAGATGGAGAAAACAGCCAGAA
1:57458586-57460321_126	AGAGTGAAGGAGTGAATGAAGAACATGAGGTTTTACAGATGGAGAAAACAGCCAGAACAAAACACTCCCAACACACTCCAATCTACTGCAATGACATCTTTAAAGAGGAGAAAGAGCAAA
1:57458586-57460321_189	ACTCCCAACACACTCCAATCTACTGCAATGACATCTTTAAAGAGGAGAAAGAGCAAATCAAGACTGTTCTTACTAAAGGCATCGCTGGAATCGGAAAAACCGTCTCTGTGCAAAAGTTCA
1:57458586-57460321_252	CTGTTCTTACTAAAGGCATCGCTGGAATCGGAAAAACCGTCTCTGTGCAAAAGTTCATTCTGGACTGGGCCGAGGGAAAAGCCAATCAGGATGTAGATTTCATGTTTGTGCTTCCATTTC
1:57458586-57460321_315	ACTGGGCCGAGGGAAAAGCCAATCAGGATGTAGATTTCATGTTTGTGCTTCCATTTCGAGAGCTGAACTTGATCAGAGATCATCAGTACAGTCTTCACACACTTCTGCTGGACTTTCATC
1:57458586-57460321_378	TGAACTTGATCAGAGATCATCAGTACAGTCTTCACACACTTCTGCTGGACTTTCATCCTGAACTTGAAGATCTGGAGCCCAAGATTTATGAGGAGTGTAAAGTTGTGTTCATCTTTGATG
1:57458586-57460321_441	TTGAAGATCTGGAGCCCAAGATTTATGAGGAGTGTAAAGTTGTGTTCATCTTTGATGGTCTGGATGAAAGCAGAATCACACTGATGTTTTCAGACGCTCAGAAAGTTTGTGATGTGACTG
1:57458586-57460321_504	ATGAAAGCAGAATCACACTGATGTTTTCAGACGCTCAGAAAGTTTGTGATGTGACTGAGACTTCATCAGTGGCTGTGTTGATGTCAAAGCTGATGAAAGGAGAGCTGCTTCCCTCTGCTC
1:57458586-57460321_567	CATCAGTGGCTGTGTTGATGTCAAAGCTGATGAAAGGAGAGCTGCTTCCCTCTGCTCTCATCTGGATCACCTCCAGACCAGCAGCAGCCAATCAGATCCCCTCCAAATACATCAAGCGTC
1:57458586-57460321_630	GGATCACCTCCAGACCAGCAGCAGCCAATCAGATCCCCTCCAAATACATCAAGCGTCTGACAGAAATTCAGGGATTCACTGAGCCTCAGAAGGAGGAATATTTCAGGAAGAGAATCAGTG
1:57458586-57460321_693	AAATTCAGGGATTCACTGAGCCTCAGAAGGAGGAATATTTCAGGAAGAGAATCAGTGAGCAGCATCAAGCCAGCAGAATCATCTCACACATCAGAAGAGCAAGAAGCCTCCACATCATGT
1:57458586-57460321_756	ATCAAGCCAGCAGAATCATCTCACACATCAGAAGAGCAAGAAGCCTCCACATCATGTGCCACATACCCGTCTTCTGCTGGATCTCATCCACTGTGCTTCAGAAGCTCCTGGAAGAAGATC
1:57458586-57460321_819	TACCCGTCTTCTGCTGGATCTCATCCACTGTGCTTCAGAAGCTCCTGGAAGAAGATCTGAGTGCAGAAATCCCTCAAACTCTGACTGAAATGTACATCCACTTCCTGCTGATTCAGATCA
1:57458586-57460321_882	CAGAAATCCCTCAAACTCTGACTGAAATGTACATCCACTTCCTGCTGATTCAGATCAACATGAGGAATCAGAAGTATGAAGAGAGAGATCCAGAGAAACTCCTGCAGTCCAACAGAGAAG
1:57458586-57460321_945	GGAATCAGAAGTATGAAGAGAGAGATCCAGAGAAACTCCTGCAGTCCAACAGAGAAGTGATTGTCAAACTTGCTGAAGTGGCTTTCAGACAGCTGATGAAGGGCAATGTGATGTTCTATG
1:57458586-57460321_1008	TCAAACTTGCTGAAGTGGCTTTCAGACAGCTGATGAAGGGCAATGTGATGTTCTATGAGGAGGACCTGATTGAGAGCGGCGTAGACGTCTCTGACGCCTCAGTGTATTCTGGGATTTGCA
1:57458586-57460321_1071	ACCTGATTGAGAGCGGCGTAGACGTCTCTGACGCCTCAGTGTATTCTGGGATTTGCACTGAGATCTTTAAGGAGGAATCTGTGATTCACCAGAGGAAAGTCTACAGCTTCATCCATCTGA
1:57458586-57460321_1134	TCTTTAAGGAGGAATCTGTGATTCACCAGAGGAAAGTCTACAGCTTCATCCATCTGAGCTTCCAGGAGTTCCTCGCTGCTTTCCATGTGTTTTACTACCACATAACCTGCTCCACAGAGG
1:57458586-57460321_1197	AGGAGTTCCTCGCTGCTTTCCATGTGTTTTACTACCACATAACCTGCTCCACAGAGGCAAGTTTAGATTCACTGCATGATTTGCAGAAAAGAATTATAAATAAATCCATTGAGAGTGAGA
1:57461190-57461719_0	TGCCTGTGTTCTCACTCTGGATCCAAACACAGCACACACTCATCTTGTTCTGTCTGAAAAGAACAGAGAGGCCAGAAATGTGACAGATCCTCAGCCGTATCCTGATCATCCAGAGAGATT
1:57461190-57461719_59	AGAACAGAGAGGCCAGAAATGTGACAGATCCTCAGCCGTATCCTGATCATCCAGAGAGATTTAAGATCAATGAGCAGGTTCTGTGTAGAGAGCCTCTGACTGGACGCTGTTACTGGGAAG
1:57461190-57461719_118	TTTAAGATCAATGAGCAGGTTCTGTGTAGAGAGCCTCTGACTGGACGCTGTTACTGGGAAGTGAAATGGAGCGGCTCTGGTCATATTGGGGTGGCTTATAAAGCCATCGACAGGAAAAGT
1:57461190-57461719_177	AGTGAAATGGAGCGGCTCTGGTCATATTGGGGTGGCTTATAAAGCCATCGACAGGAAAAGTGGGCTTGACTCTTGGTTTGGGCTCAATGAAAACTCTTGGAGTCTGTACAGCTGTGATAC
1:57461190-57461719_236	GTGGGCTTGACTCTTGGTTTGGGCTCAATGAAAACTCTTGGAGTCTGTACAGCTGTGATACGATTTACACAGTCTGGCACAATAATAAGAGCGCTGATATTATTGCTCCTTCAGCTTGTA
1:57461190-57461719_295	ACGATTTACACAGTCTGGCACAATAATAAGAGCGCTGATATTATTGCTCCTTCAGCTTGTACCAATAGAGTAGGAGTGTATGTGGATGTGCCATCTGGCTCTCTGTCTTTTTACAGTGTC
1:57461190-57461719_354	TACCAATAGAGTAGGAGTGTATGTGGATGTGCCATCTGGCTCTCTGTCTTTTTACAGTGTCTCTGACACAAACACACTCACACACATACACACATTCAACACCACATTCACTAAAGAGCT
1:57461190-57461719_409	AGTGTCTCTGACACAAACACACTCACACACATACACACATTCAACACCACATTCACTAAAGAGCTCTATACAGGATTTGGGATTTATCCTGAAGCTTCAGTGTCTCTGTGTCAGATTTAA
1:57486771-57488627_0	TTTCTGAATCTGTTTGGTTTTGTTGACACTTCTATCAGGAGGTGTGATATACATGAGCGATGTGTGAACATTACACAGAGCAACATTGGATCACAAACACTGAAGACAAGAGACCTACAG
1:57486771-57488627_62	TGTGAACATTACACAGAGCAACATTGGATCACAAACACTGAAGACAAGAGACCTACAGAGAGTCAAAGACCAGCTCAAAGCCAGCATGAAGAACAAGTATGAGCTGTTATCTGAAGGAAT
1:57486771-57488627_124	TCAAAGACCAGCTCAAAGCCAGCATGAAGAACAAGTATGAGCTGTTATCTGAAGGAATTAAAGTAAAAGAGAATCAAACCCACCTGAACCGTATCTACACCCAGCTGTACATCATAGAAG
1:57486771-57488627_186	GTAAAAGAGAATCAAACCCACCTGAACCGTATCTACACCCAGCTGTACATCATAGAAGGAGAGAGTGAAGGAGTGAATGAAGAACATGAGGTTTTACAGATGGAGAAAACAGCCAGAACA
1:57486771-57488627_248	GAGTGAAGGAGTGAATGAAGAACATGAGGTTTTACAGATGGAGAAAACAGCCAGAACAAAACACTCCCAACACACTCCAATCTACTGCAATGACATCTTTAAAGAGGAGAAAGAGCAAAT
1:57486771-57488627_310	ACTCCCAACACACTCCAATCTACTGCAATGACATCTTTAAAGAGGAGAAAGAGCAAATCAAGACTGTTCTTACTAAAGGCATCGCTGGAATCGGAAAAACCGTCTCTGTGCAGAAGTTCA
1:57486771-57488627_372	ACTGTTCTTACTAAAGGCATCGCTGGAATCGGAAAAACCGTCTCTGTGCAGAAGTTCATTCTGGACTGGGCCGAGGGAAAAGCCAATCAGGATGTAGATTTCATGTTTGTGCTTCCATTT
1:57486771-57488627_434	GGACTGGGCCGAGGGAAAAGCCAATCAGGATGTAGATTTCATGTTTGTGCTTCCATTTCGAGAGCTGAACTTGATCAGAGATCATCAGTACAGTCTTCACACACTTCTGCTGGACTTTCA
1:57486771-57488627_496	AGCTGAACTTGATCAGAGATCATCAGTACAGTCTTCACACACTTCTGCTGGACTTTCATCCTGAACTTGAAGATCTGGAGCCCAAGATTTATGAGAAGTGTAAAGTTGTGTTCATCTTTG
1:57486771-57488627_558	GAACTTGAAGATCTGGAGCCCAAGATTTATGAGAAGTGTAAAGTTGTGTTCATCTTTGATGGTCTGGATGAAAGCAGAATCACACTGATGTTTTCAGACGCTCAGAAAGTTTGTGATGTG
1:57486771-57488627_620	TCTGGATGAAAGCAGAATCACACTGATGTTTTCAGACGCTCAGAAAGTTTGTGATGTGACTGAGACTTCATCAGTGGCTGTGTTGATGTCAAAGCTGATGAAAGGAGAGCTGCTTCCCTC
1:57486771-57488627_682	AGACTTCATCAGTGGCTGTGTTGATGTCAAAGCTGATGAAAGGAGAGCTGCTTCCCTCTGCTCTCATCTGGATCACCTCCAGACCAGCAGCAGCCAATCAGATCCCCTCCAAATACATCA
1:57486771-57488627_744	CTCATCTGGATCACCTCCAGACCAGCAGCAGCCAATCAGATCCCCTCCAAATACATCAAGCGTCTGACAGAAATTCAGGGATTCACTGAGCCTCAGAAGGAGGAATATTTCAGGAAGAGA
1:57486771-57488627_806	TCTGACAGAAATTCAGGGATTCACTGAGCCTCAGAAGGAGGAATATTTCAGGAAGAGAATCAATGAGAAGCATCAAGCCAGCAGAATCATCTCACACATCAGAAGAGCAAGAAGCCTCCA
1:57486771-57488627_868	ATGAGAAGCATCAAGCCAGCAGAATCATCTCACACATCAGAAGAGCAAGAAGCCTCCACATCATGTGCCACATACCCGTCTTCTGCTGGATCTCATCCACTGTGCTTCAGAAGCTCCTGG
1:57486771-57488627_930	ATGTGCCACATACCCGTCTTCTGCTGGATCTCATCCACTGTGCTTCAGAAGCTCCTGGAAGAAGATCTGAGTGCAGAAATCCCTCAAACTCTGACTGAAATGTACATCCACTTCCTGCTG
1:57486771-57488627_992	AGATCTGAGTGCAGAAATCCCTCAAACTCTGACTGAAATGTACATCCACTTCCTGCTGATTCAGATCAACATGAGGAATCAGAAGTATGAAGAGAGAGATCCAGAGAAACTCCTGCAGTC
1:57486771-57488627_1054	AGATCAACATGAGGAATCAGAAGTATGAAGAGAGAGATCCAGAGAAACTCCTGCAGTCTAACAGAGAAGTGATTGTCAAACTTGCTGAAGTGGCTTTCAGACAGCTGATGAAGGGCAATG
1:57486771-57488627_1116	AGAGAAGTGATTGTCAAACTTGCTGAAGTGGCTTTCAGACAGCTGATGAAGGGCAATGTGATGTTCTATGAGGAGGACCTGATTGAGAGCGGCATCGACATCTGTGAGGCCTCAGTGTGT
1:57486771-57488627_1178	GTTCTATGAGGAGGACCTGATTGAGAGCGGCATCGACATCTGTGAGGCCTCAGTGTGTACTGGGATTTGCACTGAGATCTTTAAGGAGGAATCTGTGATTCTTCTGACGAAAGTCTACAG
1:57486771-57488627_1240	GGATTTGCACTGAGATCTTTAAGGAGGAATCTGTGATTCTTCTGACGAAAGTCTACAGCTTCATCCATCTGAGTGTTCAGGAATTTCTGGCTGCTTTCTATGTGTTTTACGTTCATGTAA
1:57486771-57488627_1302	ATCCATCTGAGTGTTCAGGAATTTCTGGCTGCTTTCTATGTGTTTTACGTTCATGTAAGCAGCACTACAGAAGCATCTTTTGATTCACTAGAAAATCTCCATAAAAGAATCATTGATAAA
1:57490127-57490656_0	TGCCTGCTTTCTCACACTGGATCCAAACACAGCACACAATCAACTTCAAGTGTCTGATGGAAACAGAAAGGCAGTGCATATGAAAGATCCTCAGCCGTATCCTGATCATCCAGAGAGATT
1:57490127-57490656_59	GAAACAGAAAGGCAGTGCATATGAAAGATCCTCAGCCGTATCCTGATCATCCAGAGAGATTTGAGCTACAGGAGCAGGTTCTGTGTAGAGAGACTCTGACTGGACGCTGTTACTGGGAGT
1:57490127-57490656_118	TTTGAGCTACAGGAGCAGGTTCTGTGTAGAGAGACTCTGACTGGACGCTGTTACTGGGAGTCTAAATGGAGTGGATCTGGTTATGTAGCAGTGGCCTATAAAGCGATCGACAGGAAAGGA
1:57490127-57490656_177	GTCTAAATGGAGTGGATCTGGTTATGTAGCAGTGGCCTATAAAGCGATCGACAGGAAAGGAGGGCTTGAATCTTGGTTTGGACTCAACGAAAGGTCCTGGAGTATTTACTGCTCCAATAT
1:57490127-57490656_236	GAGGGCTTGAATCTTGGTTTGGACTCAACGAAAGGTCCTGGAGTATTTACTGCTCCAATATAAATTACACCGCCTGGCACAATAACGAGGGCACTGATATTATTGCTCCTTCCTCTCGCA
1:57490127-57490656_295	ATAAATTACACCGCCTGGCACAATAACGAGGGCACTGATATTATTGCTCCTTCCTCTCGCAATAATAGAGTAGGAGTGTATGTGGACGTGCCGTCCGGTTCTATGTCCTTCTACAGTGTC
1:57490127-57490656_354	CAATAATAGAGTAGGAGTGTATGTGGACGTGCCGTCCGGTTCTATGTCCTTCTACAGTGTCTCTGACACACACACACTCACACACTTACACACATTCAACACCACATTCACTGAAGACAT
1:57490127-57490656_409	AGTGTCTCTGACACACACACACTCACACACTTACACACATTCAACACCACATTCACTGAAGACATCTATGCAGGATTCAGGATATATCCTAAATCTTCAGTGTCTCTGTGTCAGATTTAA
1:57497971-57499815_0	ATGATGGGATTTACATCATCCTTTCACTATAAAAATCAAGGTCACATCAGTCAGGATAACACAGCAACAATCCTGCAGATGCAAACATTAGAGACTGTAAACCTGCAGAGAGTCAAAGAC
1:57497971-57499815_62	AGCAACAATCCTGCAGATGCAAACATTAGAGACTGTAAACCTGCAGAGAGTCAAAGACCAGCACAAAACTAGCATGAGGAAGAAGTATGAGCTGTTATCTGAAGGAATTAAAGTAAAAGA
1:57497971-57499815_124	ACAAAACTAGCATGAGGAAGAAGTATGAGCTGTTATCTGAAGGAATTAAAGTAAAAGAGACTGGAACCCACCTGAGCCGTATCTACACCCAGCTGTACATCATAGAGGGAGAGAGTGAAG
1:57497971-57499815_186	GGAACCCACCTGAGCCGTATCTACACCCAGCTGTACATCATAGAGGGAGAGAGTGAAGGAGTGAATGAAGAACATGAGGTTTTACAGATGGAGAAAACAGCCAGAACAAAACACTCCCAA
1:57497971-57499815_248	GAATGAAGAACATGAGGTTTTACAGATGGAGAAAACAGCCAGAACAAAACACTCCCAACACACTCCAATCTACTGCAATGACATCTTTAAAGAGGAGAAAGAGCAAATCAAGACTGTTCT
1:57497971-57499815_310	CTCCAATCTACTGCAATGACATCTTTAAAGAGGAGAAAGAGCAAATCAAGACTGTTCTTACTAAAGGCATCGCTGGAATCGGAAAAACCGTCTCTGTGCAGAAGTTCATTCTGGACTGGG
1:57497971-57499815_372	AAAGGCATCGCTGGAATCGGAAAAACCGTCTCTGTGCAGAAGTTCATTCTGGACTGGGCCGAGGGAAAAGCCAATCAGGATGTAGATTTCATGTTTGTGCTTCCATTTCGAGAGCTGAAC
1:57497971-57499815_434	GGGAAAAGCCAATCAGGATGTAGATTTCATGTTTGTGCTTCCATTTCGAGAGCTGAACTTGATCAGAGATCATCAGTACAGTCTTCACACACTTCTGCTGGACTTTCATCCTGAACTTGA
1:57497971-57499815_496	TCAGAGATCATCAGTACAGTCTTCACACACTTCTGCTGGACTTTCATCCTGAACTTGAAGATCTGGAGCCCAAGATTTATGAGGAGTGTAAAGTTGTGTTCATCTTTGATGGTCTGGATG
1:57497971-57499815_558	CTGGAGCCCAAGATTTATGAGGAGTGTAAAGTTGTGTTCATCTTTGATGGTCTGGATGAAAGCAGAATCACACTGATGTTTTCAGACGCTCAGAAAGTTTGTGATGGGACTGAGACTTCA
1:57497971-57499815_620	CAGAATCACACTGATGTTTTCAGACGCTCAGAAAGTTTGTGATGGGACTGAGACTTCATCAGTGGCTGTGTTGATGTCAAAGCTGATGAAAGGAGAGCTGCTTCCCTCTGCTCTCATCTG
1:57497971-57499815_682	TGGCTGTGTTGATGTCAAAGCTGATGAAAGGAGAGCTGCTTCCCTCTGCTCTCATCTGGATCACCTCCAGACCAGCAGCAGCCAATCAGATCCCCTCCAAATACATCAAGCGTCTGACAG
1:57497971-57499815_744	ACCTCCAGACCAGCAGCAGCCAATCAGATCCCCTCCAAATACATCAAGCGTCTGACAGAAATTCAGGGATTCACTGAGCCTCAGAAGGAGGAATATTTCAGGAAGAGAATCAGTGAGCAG
1:57497971-57499815_806	TCAGGGATTCACTGAGCCTCAGAAGGAGGAATATTTCAGGAAGAGAATCAGTGAGCAGCATCAAGCCAGCAGAATCATCTCACACATCAGAAGAGCAAGAAGCCTCCACATCATGTGCCA
1:57497971-57499815_868	AAGCCAGCAGAATCATCTCACACATCAGAAGAGCAAGAAGCCTCCACATCATGTGCCACATACCCGTCTTCTGCTGGATCTCATCCACTGTGCTTCAGAAGCTCCTGGAAGAAGATCTGA
1:57497971-57499815_930	CCCGTCTTCTGCTGGATCTCATCCACTGTGCTTCAGAAGCTCCTGGAAGAAGATCTGAGTGCAGAAATCCCTCAAACTCTGACTGAAATGTACATCCACTTCCTGCTGATTCAGATCAAC
1:57497971-57499815_992	AGAAATCCCTCAAACTCTGACTGAAATGTACATCCACTTCCTGCTGATTCAGATCAACATGAGGAATCAGAAGTATGAAGAGAGAGATCCAGAGAAACTCCTGCAGTCCAACAGAGAAGT
1:57497971-57499815_1054	GGAATCAGAAGTATGAAGAGAGAGATCCAGAGAAACTCCTGCAGTCCAACAGAGAAGTGATTGTCAAACTTGCTGAAGTGGCTTTCAGACAGCTGATGAAGGGCAATGTGATGTTCTATG
1:57497971-57499815_1116	GTCAAACTTGCTGAAGTGGCTTTCAGACAGCTGATGAAGGGCAATGTGATGTTCTATGAGGAGGACCTGATTGAGAGTGGCGTAGACGTCTCTGACGCCTCAGTGTATTCTGGGATTTGC
1:57497971-57499815_1178	GGACCTGATTGAGAGTGGCGTAGACGTCTCTGACGCCTCAGTGTATTCTGGGATTTGCACTGAGATCTTTAAGGAGGAATCTGTGATTCAGCAGAGGAAAGTCTACAGCTTCATCCATCT
1:57497971-57499815_1240	AGATCTTTAAGGAGGAATCTGTGATTCAGCAGAGGAAAGTCTACAGCTTCATCCATCTGAGTGTTCAGGAGTTCCTCGCTGCTTTACATGTGTTTTACTACCACATAACCTGCTCCACAG
1:57497971-57499815_1302	GTTCAGGAGTTCCTCGCTGCTTTACATGTGTTTTACTACCACATAACCTGCTCCACAGAGGCATGTTTAGATTCACTGCATGATTTACAAAGAAGAGCAGTAGATAAAGCCATTGAGAGT
1:57501115-57501641_0	TGCTGTTTTTCTCACTCTGGATCCAAACACAGCACACAATCAACTCATCCTGTCTGAGGGAAACAGAAAGGCAAAATTTGAGAAAGAGCATCAGCCGTATCCTGATCATCCTGACAGATT
1:57501115-57501641_58	GGAAACAGAAAGGCAAAATTTGAGAAAGAGCATCAGCCGTATCCTGATCATCCTGACAGATTTGAGCACCATGAGCAGGTTCTGTGTAAAGAGACTCTGACTGGACGCTGTTACTGGGAG
1:57501115-57501641_116	GATTTGAGCACCATGAGCAGGTTCTGTGTAAAGAGACTCTGACTGGACGCTGTTACTGGGAGGCTGAATGGAGCAGTTGGTCTTATATAGCAGTCACCTATAGAGGAATCAACAGGAAAG
1:57501115-57501641_174	GGAGGCTGAATGGAGCAGTTGGTCTTATATAGCAGTCACCTATAGAGGAATCAACAGGAAAGGAGGGAGTGACTCTTGGTTTGGGTACAATGATAAATCCTGGAGCATGTACTGCACTGA
1:57501115-57501641_232	AAAGGAGGGAGTGACTCTTGGTTTGGGTACAATGATAAATCCTGGAGCATGTACTGCACTGATGACAGATTCACAGTCTGGCATAATAATAACAAAACTGACATCCCAGCTCCTTTATCC
1:57501115-57501641_290	CTGATGACAGATTCACAGTCTGGCATAATAATAACAAAACTGACATCCCAGCTCCTTTATCCAAGTTAAAAAGATTAGGAGTGTATGTCGACGTTCCATCCGGCTCTTTGTCCTTCTACA
1:57501115-57501641_348	ATCCAAGTTAAAAAGATTAGGAGTGTATGTCGACGTTCCATCCGGCTCTTTGTCCTTCTACAGTGTCTCTGACACACACACACTCACACTCATACACACACTCAACACCACATTCACTGA
1:57501115-57501641_406	TACAGTGTCTCTGACACACACACACTCACACTCATACACACACTCAACACCACATTCACTGAACCCCTCTATGCTGGATTCAGAGTGTTTGAAACGACATTGACTCTGTGTCAGATTTAA
1:57527757-57529632_0	TTTCAGTTTTAGCAGTCAAAAGAAACCTAAGGTGGTCGCATTTGTCCAGTCTTCTAAATCCAAAAATGAGACTTGTATCATTCAAGAAAATACAGAAACACCTCTGCAGAGACAAGCACT
1:57527757-57529632_63	AAATGAGACTTGTATCATTCAAGAAAATACAGAAACACCTCTGCAGAGACAAGCACTGGAGACTGGAGACCTGCAGAGAGTCAAAGACCATCACAAAACCAGCATGAAGAACAAATATGA
1:57527757-57529632_126	TGGAGACCTGCAGAGAGTCAAAGACCATCACAAAACCAGCATGAAGAACAAATATGAGAAATTTCTTGAGGGAAACAAACTCAATCAGAATGAAACCCTGCTGAACCGGATCTACACCCA
1:57527757-57529632_189	TCTTGAGGGAAACAAACTCAATCAGAATGAAACCCTGCTGAACCGGATCTACACCCAGCTGTACATCATAGAGGGAGAGAGTGAAGGAGTGAATGAAGAACATGAGGTTTTACAGATGGA
1:57527757-57529632_252	CATCATAGAGGGAGAGAGTGAAGGAGTGAATGAAGAACATGAGGTTTTACAGATGGAGAAAACAGCCAGAACAAAACACTCCCAACACACTCCAATCTACTGCAATGACATCTTTAAAGA
1:57527757-57529632_315	AGCCAGAACAAAACACTCCCAACACACTCCAATCTACTGCAATGACATCTTTAAAGAGGAGAAAGAGCAAATCAAGACTGTTCTTACTAAAGGCATCGCTGGAATCGGAAAAACCGTCTC
1:57527757-57529632_378	AGAGCAAATCAAGACTGTTCTTACTAAAGGCATCGCTGGAATCGGAAAAACCGTCTCTGTGCAGAAGTTCATTCTGGACTGGGCCGAGGGAAAAGCCAATCAGGATGTAGATTTCATGTT
1:57527757-57529632_441	GAAGTTCATTCTGGACTGGGCCGAGGGAAAAGCCAATCAGGATGTAGATTTCATGTTTGTGCTTCCATTTCGAGAGCTGAACTTGATCAGAGATCATCAGTACAGTCTTCACACACTTTT
1:57527757-57529632_504	TCCATTTCGAGAGCTGAACTTGATCAGAGATCATCAGTACAGTCTTCACACACTTTTGCTGGACTTTCATCCTGAACTTGAAGATCTGGAGCCCAAGATTTATGAGGAGTGTAAAGTTGT
1:57527757-57529632_567	CTTTCATCCTGAACTTGAAGATCTGGAGCCCAAGATTTATGAGGAGTGTAAAGTTGTGTTCATCTTTGATGGTCTGGATGAAAGCAGAATCACACTGATGTTTTCAGACGCTCAGAAAGT
1:57527757-57529632_630	CTTTGATGGTCTGGATGAAAGCAGAATCACACTGATGTTTTCAGACGCTCAGAAAGTTTGTGATGTGACTGAGACTTCATCAGTGGCTGTGTTGATGTCAAAGCTGATGAAAGGAGAGCT
1:57527757-57529632_693	TGTGACTGAGACTTCATCAGTGGCTGTGTTGATGTCAAAGCTGATGAAAGGAGAGCTGCTTCCCTCTGCTCTCATCTGGATCACCTCCAGACCAGCAGCAGCCAATCAGATCCCCTCCAA
1:57527757-57529632_756	CTCTGCTCTCATCTGGATCACCTCCAGACCAGCAGCAGCCAATCAGATCCCCTCCAAATACATCAAGCGTCTGACAGAAATTCAGGGATTCACTGAGCCTCAGAAGGAGGAATATTTCAG
1:57527757-57529632_819	CAAGCGTCTGACAGAAATTCAGGGATTCACTGAGCCTCAGAAGGAGGAATATTTCAGGAAGAGAATCAGTGAGCAGCATCAAGCCAGCAGAATCATCTCACACATCAGAAGAGCAAGAAG
1:57527757-57529632_882	AATCAGTGAGCAGCATCAAGCCAGCAGAATCATCTCACACATCAGAAGAGCAAGAAGCCTCCACATCATGTGCCACATACCCGTCTTCTGCTGGATCTCATCCACTGTGCTTCAGAAGCT
1:57527757-57529632_945	CATCATGTGCCACATACCCGTCTTCTGCTGGATCTCATCCACTGTGCTTCAGAAGCTCCTGGAAGAAGATCTGAGTGCAGAAATCCCTCAAACTCTGACTGAAATGTACATCCACTTCCT
1:57527757-57529632_1008	AGAAGATCTGAGTGCAGAAATCCCTCAAACTCTGACTGAAATGTACATCCACTTCCTGCTGATTCAGATCAACATGAGGAATCAGAAGTATGAAGAGAGAGATCCAGAGAAACTCCTGCA
1:57527757-57529632_1071	TCAGATCAACATGAGGAATCAGAAGTATGAAGAGAGAGATCCAGAGAAACTCCTGCAGTCCAACAGAGAAGTGATTGTCAAACTTGCTGAAGTGGCTTTCAGACAGCTGATGAAGGGCAA
1:57527757-57529632_1134	CAGAGAAGTGATTGTCAAACTTGCTGAAGTGGCTTTCAGACAGCTGATGAAGGGCAATGTGATGTTCTATGAGGAGGACCTGATTGAGAGCGGCATCGACATCTGTGAGGCCTCAGTGTG
1:57527757-57529632_1197	GTTCTATGAGGAGGACCTGATTGAGAGCGGCATCGACATCTGTGAGGCCTCAGTGTGTACCGGGATTTGCACTGAGATCTTTAAGGAAGAATCTGTGATTCAGCAGAGGAAAGTCTACAG
1:57527757-57529632_1260	GATTTGCACTGAGATCTTTAAGGAAGAATCTGTGATTCAGCAGAGGAAAGTCTACAGCTTCATCCATCTGAGTGTTCAGGAGTTTCTCGCTGCTTTCTATGTGTTTTACTACCACATAAG
1:57527757-57529632_1323	CCATCTGAGTGTTCAGGAGTTTCTCGCTGCTTTCTATGTGTTTTACTACCACATAAGCAACACTTCTATAGCATGTTTTGATTCACTGCATAAACTCCATAAAAGAGTAGTTGATGAAGC
1:57531988-57532524_0	GTTCAGATGCCGTTAATCTCACACTGGATCCAAACACAGCACACACTCAGCTCATCCTGTCTGATGAAAACAAAACAGTAAGATGTGTGAAAGATCCTCAGCTGTATCCTGATCATCCAG
1:57531988-57532524_60	CTGATGAAAACAAAACAGTAAGATGTGTGAAAGATCCTCAGCTGTATCCTGATCATCCAGACAGATTTAAGACCAATGAGCAGGTTCTGTGTAAAGAGACTCTGACTGGACGCTGTTACT
1:57531988-57532524_120	ACAGATTTAAGACCAATGAGCAGGTTCTGTGTAAAGAGACTCTGACTGGACGCTGTTACTGGGAGGTGAAATGGAGCGGCTCTGGTCATATTGGGGTGGCTTATTATGGCATCGACAGGA
1:57531988-57532524_180	GGGAGGTGAAATGGAGCGGCTCTGGTCATATTGGGGTGGCTTATTATGGCATCGACAGGAAAAGTGGGCTTGAATCTTGGTTTGGACTCAATGAAAACTCTTGGAGTCTGTACTGCAGTG
1:57531988-57532524_240	AAAGTGGGCTTGAATCTTGGTTTGGACTCAATGAAAACTCTTGGAGTCTGTACTGCAGTGATACAGTTTACACCGCCTGGTACAACAATGAGAGCGCTGATATTATTGCTCCTTCAGCTT
1:57531988-57532524_300	ATACAGTTTACACCGCCTGGTACAACAATGAGAGCGCTGATATTATTGCTCCTTCAGCTTGTATTAATAGAGTAGGAGTGTATGTGGACGTGCCGTCTGACACTCTGTCCTTCTACAGTG
1:57531988-57532524_360	GTATTAATAGAGTAGGAGTGTATGTGGACGTGCCGTCTGACACTCTGTCCTTCTACAGTGTCTCTGATGCAAACACACTCACACTCATACACACATTCAACACCACATTCACTGAACCCC
1:57531988-57532524_416	AGTGTCTCTGATGCAAACACACTCACACTCATACACACATTCAACACCACATTCACTGAACCCCTCTACACAGGATTTAGCATTTATCCTGAATCTTCGGTGACTCTGTGTCAGATTTAA
1:57546767-57548527_0	AAACACAAGATTGAAAACATGCAGAGAGTCAAAGACAAGCACAAAGCCATCATGAGGAACAAGTATGATAGATTATATGAAGGAATCAAACTACAAGAGACCGAAACCCTCCTAAACCGG
1:57546767-57548527_64	ATGATAGATTATATGAAGGAATCAAACTACAAGAGACCGAAACCCTCCTAAACCGGATCTACACCCAGCTGTACATCATAGATGGAGAGAGTGGAGGAGTAAATGAAGAACATGAGGTTT
1:57546767-57548527_128	CCAGCTGTACATCATAGATGGAGAGAGTGGAGGAGTAAATGAAGAACATGAGGTTTTACAGATGGAGAAAACAGCCAGAACAAAACACTCCCAACACACTCCAATCTACTGCAATGACAT
1:57546767-57548527_192	GAGAAAACAGCCAGAACAAAACACTCCCAACACACTCCAATCTACTGCAATGACATCTTTAAAGAGGAGAAAGAGCAAATCAAGACTGTTCTTACTAAAGGCATCGCTGGAATCGGAAAA
1:57546767-57548527_256	AGGAGAAAGAGCAAATCAAGACTGTTCTTACTAAAGGCATCGCTGGAATCGGAAAAACCGTCTCTGTGCAGAAGTTCATTCTGGACTGGGCCGAGGGAAAAGCCAATCAGGATGTAGATT
1:57546767-57548527_320	TGTGCAGAAGTTCATTCTGGACTGGGCCGAGGGAAAAGCCAATCAGGATGTAGATTTCATGTTTGTGCTTCCATTTCGAGAGCTGAACTTGATCAGAGATCATCAGTACAGTCTTCACAC
1:57546767-57548527_384	GTGCTTCCATTTCGAGAGCTGAACTTGATCAGAGATCATCAGTACAGTCTTCACACACTTCTGCTGGACTTTCATCCTGAACTTGAAGATCTGGAGCCCAAGATTTATGAGGAGTGTAAA
1:57546767-57548527_448	TGGACTTTCATCCTGAACTTGAAGATCTGGAGCCCAAGATTTATGAGGAGTGTAAAGTTGTGTTCATCTTTGATGGTCTGGATGAAAGCAGAATCACACTGATGTTTTCAGACGCTCAGA
1:57546767-57548527_512	CATCTTTGATGGTCTGGATGAAAGCAGAATCACACTGATGTTTTCAGACGCTCAGAAAGTTTGTGATGTGACTGAGACTTCATCAGTGGCTGTGTTGATGTCAAAGCTGATGAAAGGAGA
1:57546767-57548527_576	GATGTGACTGAGACTTCATCAGTGGCTGTGTTGATGTCAAAGCTGATGAAAGGAGAGCTGCTTCCCTCTGCTCTCATCTGGATCACCTCCAGACCAGCAGCAGCCAATCAGATCCCCTCC
1:57546767-57548527_640	CCTCTGCTCTCATCTGGATCACCTCCAGACCAGCAGCAGCCAATCAGATCCCCTCCAAATACATCAAGCGTCTGACAGAAATTCAGGGATTCACTGAGCCTCAGAAGGAGGAATATTTCA
1:57546767-57548527_704	CAAGCGTCTGACAGAAATTCAGGGATTCACTGAGCCTCAGAAGGAGGAATATTTCAGGAAGAGAATCAGTGAGCAGCATCAAGCCAGCAGAATCATCTCACACATCAGAAGAGCAAGAAG
1:57546767-57548527_768	ATCAGTGAGCAGCATCAAGCCAGCAGAATCATCTCACACATCAGAAGAGCAAGAAGCCTCCACATCATGTGCCACATACCCGTCTTCTGCTGGATCTCATCCACTGTGCTTCAGAAGCTC
1:57546767-57548527_832	TCATGTGCCACATACCCGTCTTCTGCTGGATCTCATCCACTGTGCTTCAGAAGCTCCTGGAAGAAGATCTGAGTGCAGAAATCCCTCAAACTCTGACTGAAATGTACATCCACTTCCTGC
1:57546767-57548527_896	AGATCTGAGTGCAGAAATCCCTCAAACTCTGACTGAAATGTACATCCACTTCCTGCTGATTCAGATCAACATGAGGAATCAGAAGTATGAAGAGAGAGATCCAGAGAAACTCCTGCAGTC
1:57546767-57548527_960	ATCAACATGAGGAATCAGAAGTATGAAGAGAGAGATCCAGAGAAACTCCTGCAGTCCAACAGAGAAGTGATTGTCAAACTTGCTGAAGTGGCTTTCAGACAGCTGATGAAGGGCAATGTG
1:57546767-57548527_1024	AAGTGATTGTCAAACTTGCTGAAGTGGCTTTCAGACAGCTGATGAAGGGCAATGTGATGTTCTATGAGGAGGACCTGATTGAGAGCGGTGTAGATGCAGCTCACACCTCAATATATTCTG
1:57546767-57548527_1088	TGAGGAGGACCTGATTGAGAGCGGTGTAGATGCAGCTCACACCTCAATATATTCTGGGATTTGCACTGAGATCTTTAAGGAGGAATCTGTGATTCAGCAGAGGAAAGTCTACAGCTTCAT
1:57546767-57548527_1152	ACTGAGATCTTTAAGGAGGAATCTGTGATTCAGCAGAGGAAAGTCTACAGCTTCATCCATCTGAGTGTTCAGGAGTTTCTGGCTGCTTTCTATGTGTTTTATTACTTCATAAGCAACACC
1:57546767-57548527_1216	GTGTTCAGGAGTTTCTGGCTGCTTTCTATGTGTTTTATTACTTCATAAGCAACACCACAGAGCCATTTTTAGATTCATTGCATAATTTACATAAGAGAGCAGTAGAAAAAACCATTGAGA
1:57549267-57549793_0	TGCAGTAGATCTCACTCTGGATCCAAACACTGCAAACACTAACATCATCCTGTCTGAGGACAACAGAAAGGCAACATACACAGAAGAGCCACAGCCGTATCCTGATCACCCAGAGAGATT
1:57549267-57549793_58	GACAACAGAAAGGCAACATACACAGAAGAGCCACAGCCGTATCCTGATCACCCAGAGAGATTTGTTGGTGGTGAACGGGTTCTGTGCCAAGAGAAACTAACTGGGCGCTGTTACTGGGAG
1:57549267-57549793_116	GATTTGTTGGTGGTGAACGGGTTCTGTGCCAAGAGAAACTAACTGGGCGCTGTTACTGGGAGGTGAAATGGAGTGGATGGGGTCATGCAGCGGTGACGTATAGAGGAATCAGGAGGAAGG
1:57549267-57549793_174	GGAGGTGAAATGGAGTGGATGGGGTCATGCAGCGGTGACGTATAGAGGAATCAGGAGGAAGGGAGGCAGCTACTGCAGGTTTGGGTACAATGACAAATCCTGGAGTCTGGATTACTCTGA
1:57549267-57549793_232	AAGGGAGGCAGCTACTGCAGGTTTGGGTACAATGACAAATCCTGGAGTCTGGATTACTCTGATGACAGATTCACTGTCTGGCACAATAAAAAGAGAATCGACATACCAGCCCTTTCACCT
1:57549267-57549793_290	CTGATGACAGATTCACTGTCTGGCACAATAAAAAGAGAATCGACATACCAGCCCTTTCACCTCAGTCTAATAGAGTAGGGGTGTATGTGGACGTGCCGTCCGGCTCTCTGTCCTTCTACA
1:57549267-57549793_348	ACCTCAGTCTAATAGAGTAGGGGTGTATGTGGACGTGCCGTCCGGCTCTCTGTCCTTCTACAGCATTTCTGACACACACACACTCACACACTTACACACATACAACACCACATTCACTGA
1:57549267-57549793_406	TACAGCATTTCTGACACACACACACTCACACACTTACACACATACAACACCACATTCACTGAACCCCTCTATGCTGGGTTCAGAGTTTATGAGTCTGAACTGTCTTTGTGCCAGATATAA
1:57557934-57559733_0	TTTGATCAGGAGATCATTGAACCAGTTTTTCAAACACAAGCTTTGGAGACTGGAGACCTGCAGAGAATCAAAGACCAGTACAAAACCAGCATGAAGAAGAAGTATGAGAGATTATTTGAG
1:57557934-57559733_63	AGAATCAAAGACCAGTACAAAACCAGCATGAAGAAGAAGTATGAGAGATTATTTGAGGGAAACAAACTCCAAGAGACTGGAACCCACCTGAACCGCATCTACACCCAGCTGTACATCATA
1:57557934-57559733_126	AAACTCCAAGAGACTGGAACCCACCTGAACCGCATCTACACCCAGCTGTACATCATAGAGGGAGAGAGTGAAGGAGTGAATGAAGAACATGAGGTTTTACAGATGGAGAAAACAGCCAGA
1:57557934-57559733_189	GAGAGTGAAGGAGTGAATGAAGAACATGAGGTTTTACAGATGGAGAAAACAGCCAGAACAAAACACTCCCAACACACTCCAATCTACTGCAATGACATCTTTAAAGAGGAGAAAGAGCAA
1:57557934-57559733_252	CACTCCCAACACACTCCAATCTACTGCAATGACATCTTTAAAGAGGAGAAAGAGCAAATCAAGACTGTTCTTACTAAAGGCATCGCTGGAATCGGAAAAACCGTCTCTGTGCAGAAGTTC
1:57557934-57559733_315	ACTGTTCTTACTAAAGGCATCGCTGGAATCGGAAAAACCGTCTCTGTGCAGAAGTTCATTCTGGACTGGGCCGAGGGAAAAGCCAATCAGGATGTAGATTTCATGTTTGTGCTTCCATTT
1:57557934-57559733_378	GACTGGGCCGAGGGAAAAGCCAATCAGGATGTAGATTTCATGTTTGTGCTTCCATTTCGAGAGCTGAACTTGATCAGAGATCATCAGTACAGTCTTCACACACTTCTGCTGGACTTTCAT
1:57557934-57559733_441	CTGAACTTGATCAGAGATCATCAGTACAGTCTTCACACACTTCTGCTGGACTTTCATCCTGAACTTGAAGATCTGGAGCCCAAGATTTATGAGGAGTGTAAAGTTGTGTTCATCTTTGAT
1:57557934-57559733_504	CTTGAAGATCTGGAGCCCAAGATTTATGAGGAGTGTAAAGTTGTGTTCATCTTTGATGGTCTGGATGAAAGCAGAATCACACTGATGTTTTCAGACGCTCAGAAAGTTTGTGATGTGACT
1:57557934-57559733_567	GATGAAAGCAGAATCACACTGATGTTTTCAGACGCTCAGAAAGTTTGTGATGTGACTGAGACTTCATCAGTGGCTGTGTTGATGTCAAAGCTGATGAAAGGAGAGCTGCTTCCCTCTGCT
1:57557934-57559733_630	TCATCAGTGGCTGTGTTGATGTCAAAGCTGATGAAAGGAGAGCTGCTTCCCTCTGCTCTCATCTGGATCACCTCCAGACCAGCAGCAGCCAATCAGATCCCCTCCAAATACATCAAGCGT
1:57557934-57559733_693	TGGATCACCTCCAGACCAGCAGCAGCCAATCAGATCCCCTCCAAATACATCAAGCGTCTGACAGAAATTCAGGGATTCACTGAGCCTCAGAAGGAGGAATATTTCAGGAAGAGAATCAGT
1:57557934-57559733_756	GAAATTCAGGGATTCACTGAGCCTCAGAAGGAGGAATATTTCAGGAAGAGAATCAGTGAGCAGCATCAAGCCAGCAGAATCATCTCACACATCAGAAGAGCAAGAAGCCTCCACATCATG
1:57557934-57559733_819	CATCAAGCCAGCAGAATCATCTCACACATCAGAAGAGCAAGAAGCCTCCACATCATGTGCCACATACCCGTCTTCTGCTGGATCTCATCCACTGTGCTTCAGAAGCTCCTGGAAGAAGAT
1:57557934-57559733_882	ATACCCGTCTTCTGCTGGATCTCATCCACTGTGCTTCAGAAGCTCCTGGAAGAAGATCTGAGTGCAGAAATCCCTCAAACTCTGACTGAAATGTACATCCACTTCCTGCTGATTCAGATC
1:57557934-57559733_945	GCAGAAATCCCTCAAACTCTGACTGAAATGTACATCCACTTCCTGCTGATTCAGATCAACATGAGGAATCAGAAGTATGAAGAGAGAGATCCAGAGAAACTCCTGCAGTCCAACAGAGAA
1:57557934-57559733_1008	AGGAATCAGAAGTATGAAGAGAGAGATCCAGAGAAACTCCTGCAGTCCAACAGAGAAGTGATTGTCAAACTTGCTGAAGTGGCTTTCAGACAGCTGATGAAGGGCAATGTGATGTTCTAT
1:57557934-57559733_1071	GTCAAACTTGCTGAAGTGGCTTTCAGACAGCTGATGAAGGGCAATGTGATGTTCTATGAGGAGGACCTGATTGAGAGCGGCGTAGACGTCTCTGACGCCTCAGTGTATTCTGGGATTTGC
1:57557934-57559733_1134	GACCTGATTGAGAGCGGCGTAGACGTCTCTGACGCCTCAGTGTATTCTGGGATTTGCACTGAGATCTTTAAGGAGGAATCTGTGATTCAGCAGAGGAAAGTCTACAGCTTCATCCATCTG
1:57557934-57559733_1197	ATCTTTAAGGAGGAATCTGTGATTCAGCAGAGGAAAGTCTACAGCTTCATCCATCTGAGTGTTCAGGAGTTTCTGGCTGCTTTCTATGTGTTTTACTACCACTCAAGCATAAATAAAGAA
1:57557934-57559733_1260	CAGGAGTTTCTGGCTGCTTTCTATGTGTTTTACTACCACTCAAGCATAAATAAAGAAGCATGTTTCGATGCACTGGAGAGTCTCTATAACAGAGTTATTAATAAAACCATTGAGAGTGAG
1:57561377-57561930_0	TGCCTGTGATCTCACACTGGATCCAAACACAGCACACACTCAACTCATCCTGTCTGAGGGGAACAGAAAGGTGATCCGAGTGAACGATCATCAGCCGTATCCTGATCATCCAGACAGGTT
1:57561377-57561930_62	ACAGAAAGGTGATCCGAGTGAACGATCATCAGCCGTATCCTGATCATCCAGACAGGTTTGCTGATATTCCTCAGATTCTGTGTAGAGAGACTCTGACTGGACGCTGTTACTGGGAGGCTG
1:57561377-57561930_124	GATATTCCTCAGATTCTGTGTAGAGAGACTCTGACTGGACGCTGTTACTGGGAGGCTGAATGGGAAACCTGGACTCGTATAGCAATGGCCTATAGAGGAATCAGCAGAAAAGTAGGAAGT
1:57561377-57561930_186	GGAAACCTGGACTCGTATAGCAATGGCCTATAGAGGAATCAGCAGAAAAGTAGGAAGTGACTGTTGTTTTGGATACAATGAAAAATCTTGGAGTCTTTTCTGCACTGCTAATGGATTCCA
1:57561377-57561930_248	GTTGTTTTGGATACAATGAAAAATCTTGGAGTCTTTTCTGCACTGCTAATGGATTCCATGTCTGGCACAATAATAAGAGCATTGATATATCAGCTCCTTCTTCAGCTAAAAGAGTTGGAG
1:57561377-57561930_310	TGGCACAATAATAAGAGCATTGATATATCAGCTCCTTCTTCAGCTAAAAGAGTTGGAGTGTATGTGGATGTGCCAGCTGGCTCTCTGTCCTTCTACAGTGTCTCTGACACACACACACTC
1:57561377-57561930_372	TGTGGATGTGCCAGCTGGCTCTCTGTCCTTCTACAGTGTCTCTGACACACACACACTCACACACTTACACACATTCAACACCACATTCACTGAAGACCTCTATGCTGGATTTATGGTTTT
1:57561377-57561930_433	CACTTACACACATTCAACACCACATTCACTGAAGACCTCTATGCTGGATTTATGGTTTTTGACTCCTCAGTGTCTTTGTGTCAGAGAGAACAAATGAAACTCTACAACAGAAAAGATTGA
1:57568664-57570605_0	AGAAAGAAAGAAAATCTGAGCCAGAGTCAGTCCAGATGTGGAGTTTCCGAGTCCAGACCCACAGAAGACATTGACTGTCCTCCATGCAGAAAGAGATGCAGATGGGGATCCAGTTTTTCT
1:57568664-57570605_63	GAAGACATTGACTGTCCTCCATGCAGAAAGAGATGCAGATGGGGATCCAGTTTTTCTGGTTCTGCTCACGGCATCACAAGAGCAGACCAGCAGGAGAACCCTGGAATCCTGGAAAAATCT
1:57568664-57570605_126	GCTCACGGCATCACAAGAGCAGACCAGCAGGAGAACCCTGGAATCCTGGAAAAATCTGTACATGATGAAGTACAGAGAGTCAAAGACCAGCACAAAACCAGCATGAAGAATAAATATGAG
1:57568664-57570605_189	GATGAAGTACAGAGAGTCAAAGACCAGCACAAAACCAGCATGAAGAATAAATATGAGAGATTATTTGAGGGAAACAGACTCCAAGAGAACCAAACCCTCCTGAACCGGATCTACACCCAG
1:57568664-57570605_252	TTTGAGGGAAACAGACTCCAAGAGAACCAAACCCTCCTGAACCGGATCTACACCCAGCTGTACATCATAGAGGGAGAGAGTGAAGGAGTGAATGAAGAACATGAGGTTTTACAGATGGAG
1:57568664-57570605_315	ATCATAGAGGGAGAGAGTGAAGGAGTGAATGAAGAACATGAGGTTTTACAGATGGAGAAAACAGCCAGAACAAAACACTCCCAACACACTCCAATCTACTGCAATGACATCTTTAAAGAG
1:57568664-57570605_378	GCCAGAACAAAACACTCCCAACACACTCCAATCTACTGCAATGACATCTTTAAAGAGGAGAAAGAGCAAATCAAGACTGTTCTTACTAAAGGCATCGCTGGAATCGGAAAAACCGTCTCT
1:57568664-57570605_441	GAGCAAATCAAGACTGTTCTTACTAAAGGCATCGCTGGAATCGGAAAAACCGTCTCTGTGCAGAAGTTCATTCTGGACTGGGCCGAGGGAAAAGCCAATCAGGATGTAGATTTCATGTTT
1:57568664-57570605_504	AAGTTCATTCTGGACTGGGCCGAGGGAAAAGCCAATCAGGATGTAGATTTCATGTTTGTGCTTCCATTTCGAGAGCTGAACTTGATCAGAGATCATCAGTACAGTCTTCACACACTTCTG
1:57568664-57570605_567	CCATTTCGAGAGCTGAACTTGATCAGAGATCATCAGTACAGTCTTCACACACTTCTGCTGGACTTTCATCCTGAACTTGAAGATCTGGAGCCCAAGATTTATGAGGAGTGTAAAGTTGTG
1:57568664-57570605_630	TTTCATCCTGAACTTGAAGATCTGGAGCCCAAGATTTATGAGGAGTGTAAAGTTGTGTTCATCTTTGATGGTCTGGATGAAAGCAGAATCACACTGATGTTTTCAGACGCTCAGAAAGTT
1:57568664-57570605_693	TTTGATGGTCTGGATGAAAGCAGAATCACACTGATGTTTTCAGACGCTCAGAAAGTTTGTGATGTGACTGAGACTTCATCAGTGACTGTGTTGATGTCAAAGCTGATGAAAGGAGAGCTG
1:57568664-57570605_756	GTGACTGAGACTTCATCAGTGACTGTGTTGATGTCAAAGCTGATGAAAGGAGAGCTGCTTCCCTCTGCTCTCATCTGGATCACCTCCAGACCAGCAGCAGCCAATCAGATCCCCTCCAAA
1:57568664-57570605_819	TCTGCTCTCATCTGGATCACCTCCAGACCAGCAGCAGCCAATCAGATCCCCTCCAAATACATCAAGCGTCTGACAGAAATTCAGGGATTCACTGAGCCTCAGAAGGAGGAATATTTCAGG
1:57568664-57570605_882	AAGCGTCTGACAGAAATTCAGGGATTCACTGAGCCTCAGAAGGAGGAATATTTCAGGAAGAGAATCAGTGAGCAGCATCAAGCCAGCAGAATCATCTCACACATCAGAAGAGCAAGAAGC
1:57568664-57570605_945	ATCAGTGAGCAGCATCAAGCCAGCAGAATCATCTCACACATCAGAAGAGCAAGAAGCCTCCACATCATGTGCCACATACCCGTCTTCTGCTGGATCTCATCCACTGTGCTTCAGAAGCTC
1:57568664-57570605_1008	ATCATGTGCCACATACCCGTCTTCTGCTGGATCTCATCCACTGTGCTTCAGAAGCTCCTGGAAGAAGATCTGAGTGCAGAAATCCCTCAAACTCTGACTGAAATGTACATCCACTTCCTG
1:57568664-57570605_1071	GAAGATCTGAGTGCAGAAATCCCTCAAACTCTGACTGAAATGTACATCCACTTCCTGCTGATTCAGATCAACATGAGGAATCAGAAGTATGAAGAGAGAGATCCAGAGAAACTCCTGCAG
1:57568664-57570605_1134	CAGATCAACATGAGGAATCAGAAGTATGAAGAGAGAGATCCAGAGAAACTCCTGCAGTCCAACAGAGAAGTGATTGTCAAACTTGCTGAAGTGGCTTTCAGACAGCTGATGAAGGGCAAT
1:57568664-57570605_1197	AGAGAAGTGATTGTCAAACTTGCTGAAGTGGCTTTCAGACAGCTGATGAAGGGCAATGTGATGTTCTATGAGGAGGACCTGATTGAGAGCGGTGTAGATGCAGCTCACACCTCAATATAT
1:57568664-57570605_1260	TTCTATGAGGAGGACCTGATTGAGAGCGGTGTAGATGCAGCTCACACCTCAATATATTCTGGGATTTGCACTGAGATCTTTAAGGAGGAATCTGTGATTCAGCAGAGGAAAGTCTACAGC
1:57568664-57570605_1323	ATTTGCACTGAGATCTTTAAGGAGGAATCTGTGATTCAGCAGAGGAAAGTCTACAGCTTCATCCATCTGAGTGTTCAGGAGTTCCTCGCTGCTTTATATGTGTTTTACTACCACATAAGC
1:57568664-57570605_1386	CATCTGAGTGTTCAGGAGTTCCTCGCTGCTTTATATGTGTTTTACTACCACATAAGCAACACTGCAGAAGCATGTTTGGATTCACTGCATGATTTACAGAAAAGAGCAGTAGATAAAGCC
1:57573251-57573795_0	TGCATTTGAGCTTACGCTGGATCCAAACACAGCGCACAATCAACTCCAGATATCCGAGGAGAACAGGAAGATCACATATGTGGAGGAGCGTCAGGCATATCCTGATCATCCAGAGAGATT
1:57573251-57573795_61	AACAGGAAGATCACATATGTGGAGGAGCGTCAGGCATATCCTGATCATCCAGAGAGATTTGAGCGCCATCCTCAGGTTCTATGTAGAGAGATTCTGACTGGACGCTGTTACTGGGAGGCT
1:57573251-57573795_122	AGCGCCATCCTCAGGTTCTATGTAGAGAGATTCTGACTGGACGCTGTTACTGGGAGGCTGAATGGAGCAGCTGGGGTCATATAGCACTGTCGTATAAAGAAATGGCCAGAAATGAAGTGA
1:57573251-57573795_183	ATGGAGCAGCTGGGGTCATATAGCACTGTCGTATAAAGAAATGGCCAGAAATGAAGTGACTGATTGTCGGTTTGGATTCAGTGATAAATCCTGGAGTCTGTTCTGCTCTGCTAATGGATT
1:57573251-57573795_244	GATTGTCGGTTTGGATTCAGTGATAAATCCTGGAGTCTGTTCTGCTCTGCTAATGGATTCACTGTTTGGCACAATAATGTGAGCACTAGCATATCTACCTCTACACCACTGTCTAACAGA
1:57573251-57573795_305	CTGTTTGGCACAATAATGTGAGCACTAGCATATCTACCTCTACACCACTGTCTAACAGAGTAGGAGTGTATGTGGACGTGTCGTCCGGCTCTCTCTCCTTCTACAGTGTCTCTGATACAC
1:57573251-57573795_366	AGGAGTGTATGTGGACGTGTCGTCCGGCTCTCTCTCCTTCTACAGTGTCTCTGATACACTCACACACATACACACATTCAACACCACATTCACTGAAGACCTCTACGCTGGGTTCAGAGT
1:57573251-57573795_424	CTCACACACATACACACATTCAACACCACATTCACTGAAGACCTCTACGCTGGGTTCAGAGTGTTTGATTCCTCCCTCGCTCTGTGTCAGATTGAAAAACCAGCTGGGAGAGACGATTGA
1:57577044-57578948_0	ATCAGCAAGAGAAAGGGACAGCGTTTACAGTCTAAAGAGTCCAGCTGTGTGTCTGTAAAGAGTAACCGATCCATCACCCCACCTGAAAACTTTAGAGATGAACCAGCAACCTCCGACTTC
1:57577044-57578948_62	TAACCGATCCATCACCCCACCTGAAAACTTTAGAGATGAACCAGCAACCTCCGACTTCAGGTGGAAGAAAGAAATTGGAGTTAAATCAGAGGATAATATGTTACAGAAAATTAAAAACCA
1:57577044-57578948_124	GGAAGAAAGAAATTGGAGTTAAATCAGAGGATAATATGTTACAGAAAATTAAAAACCAGCACAAAACCAGCATGAAGAACAAATATGAGAGATTATTTGAGGGAAACACACTCCAAGAGA
1:57577044-57578948_186	AAAACCAGCATGAAGAACAAATATGAGAGATTATTTGAGGGAAACACACTCCAAGAGAACCAAACCCTCCTGAACCGGATCTACACCCAGCTGTACATCATAGAGGGAGAGAGTGAAGGA
1:57577044-57578948_248	AACCCTCCTGAACCGGATCTACACCCAGCTGTACATCATAGAGGGAGAGAGTGAAGGAGTGAATGAAGAACATGAGGTTTTACAGATGGAGAAAACAGCCAGAACAAAACACTCCCAACA
1:57577044-57578948_310	ATGAAGAACATGAGGTTTTACAGATGGAGAAAACAGCCAGAACAAAACACTCCCAACACACTCCAATCTACTGCAATGACATCTTTAAAGAGGAGAAAGAGCAAATCAAGACTGTTCTTA
1:57577044-57578948_372	CCAATCTACTGCAATGACATCTTTAAAGAGGAGAAAGAGCAAATCAAGACTGTTCTTACTAAAGGCATCGCTGGAATCGGAAAAACCGTCTCTGTGCAGAAGTTCATTCTGGACTGGGCC
1:57577044-57578948_434	AGGCATCGCTGGAATCGGAAAAACCGTCTCTGTGCAGAAGTTCATTCTGGACTGGGCCGAGGGAAAAGCCAATCAGGATGTAGATTTCATGTTTGTGCTTCCATTTCGAGAGCTGAACTT
1:57577044-57578948_496	GAAAAGCCAATCAGGATGTAGATTTCATGTTTGTGCTTCCATTTCGAGAGCTGAACTTGATCAGAGATCATCAGTACAGTCTTCACACACTTCTGCTGGACTTTCATCCTGAACTTGAAG
1:57577044-57578948_558	AGAGATCATCAGTACAGTCTTCACACACTTCTGCTGGACTTTCATCCTGAACTTGAAGATCTGAAGCCCAAGATTTATGAGGAGTGTAAAGTTGTGTTCATCTTTGATGGTCTGGATGAA
1:57577044-57578948_620	GAAGCCCAAGATTTATGAGGAGTGTAAAGTTGTGTTCATCTTTGATGGTCTGGATGAAAGCAGAATCACACTGATGTTTTCAGACGCTCAGAAAGTTTGTGATGTGACTGAGACTTCATC
1:57577044-57578948_682	GAATCACACTGATGTTTTCAGACGCTCAGAAAGTTTGTGATGTGACTGAGACTTCATCAGTGGCTGTGTTGATGTCAAAGCTGATGAAAGGAGAGCTGCTTCCCTCTGCTCTCATCTGGA
1:57577044-57578948_744	GCTGTGTTGATGTCAAAGCTGATGAAAGGAGAGCTGCTTCCCTCTGCTCTCATCTGGATCACCTCCAGACCAGCAGCAGCCAATCAGATCCCCTCCAAATACATCAAGCGTCTGACAGAA
1:57577044-57578948_806	CTCCAGACCAGCAGCAGCCAATCAGATCCCCTCCAAATACATCAAGCGTCTGACAGAAATTCAGGGATTCACTGAGCCTCAGAAGGAGGAATATTTCAGGAAGAGAATCAGTGAGCAGCA
1:57577044-57578948_868	AGGGATTCACTGAGCCTCAGAAGGAGGAATATTTCAGGAAGAGAATCAGTGAGCAGCATCAAGCCAGCAGAATCATCTCACACATCAGAAGAGCAAGAAGCCTCCACATCATGTGCCACA
1:57577044-57578948_930	GCCAGCAGAATCATCTCACACATCAGAAGAGCAAGAAGCCTCCACATCATGTGCCACATACCCGTCTTCTGCTGGATCTCATCCACTGTGCTTCAGAAGCTCCTGGAAGAAGATCTGAGT
1:57577044-57578948_992	CGTCTTCTGCTGGATCTCATCCACTGTGCTTCAGAAGCTCCTGGAAGAAGATCTGAGTGCAGAAATCCCTCAAACTCTGACTGAAATGTACATCCACTTCCTGCTGATTCAGACCAACAT
1:57577044-57578948_1054	AAATCCCTCAAACTCTGACTGAAATGTACATCCACTTCCTGCTGATTCAGACCAACATGAGGAATCAGAAGTATGAAGAGAGAGATCCAGAGAAACTCCTGCAGTCCAACAGAGAAGTGA
1:57577044-57578948_1116	AATCAGAAGTATGAAGAGAGAGATCCAGAGAAACTCCTGCAGTCCAACAGAGAAGTGATTGTCAAACTTGCTGAAGTGGCTTTCAGACAGCTGATGAAGGGCAATGTGATGTTCTATGAG
1:57577044-57578948_1178	CAAACTTGCTGAAGTGGCTTTCAGACAGCTGATGAAGGGCAATGTGATGTTCTATGAGGAGGACCTGATTGAGAGCGGCGTAGACGTCTTTGACGCCTCAGTGTATTCTGGGATTTGCAC
1:57577044-57578948_1240	ACCTGATTGAGAGCGGCGTAGACGTCTTTGACGCCTCAGTGTATTCTGGGATTTGCACTGAGATCTTTAAGGAGGAATCTGTGATTCAGAAGAGGAAAGTCTACAGCTTCACCCATCTCA
1:57577044-57578948_1302	ATCTTTAAGGAGGAATCTGTGATTCAGAAGAGGAAAGTCTACAGCTTCACCCATCTCAGCATTCAGGAGTTCCTCGCTGCTTTCCATGTGTTTTACTACCACATAACCTGCTCCACAGAG
1:57577044-57578948_1364	TCAGGAGTTCCTCGCTGCTTTCCATGTGTTTTACTACCACATAACCTGCTCCACAGAGGCATGTTTTGATTCACTGCATGATTTACAAAGAAGAGCAGTAGATAAAGCCATTGAGAGTGA
1:57580679-57581229_0	TGCCTGTTTTCTCACACTGGATCCAATCACAGCACATACTCAGCTCCAGCTGTCTGAGGAGAACAGGAAAGCAAGTATTGTGACAGATCCTCAGCCGTATCCTGATCATCCAGACAGATT
1:57580679-57581229_62	ACAGGAAAGCAAGTATTGTGACAGATCCTCAGCCGTATCCTGATCATCCAGACAGATTTGATCAACAGGAGCAGGTTCTGTGTAGAGAGACTCTGACTGGACGCTGTTACTGGGAGGTAA
1:57580679-57581229_124	CAACAGGAGCAGGTTCTGTGTAGAGAGACTCTGACTGGACGCTGTTACTGGGAGGTAAAATGGAGCGGCTCTGGTCTTGTAGCGGTGACTTATAAAGGAATTGGCAGGAAAAGTGGATTT
1:57580679-57581229_186	GAGCGGCTCTGGTCTTGTAGCGGTGACTTATAAAGGAATTGGCAGGAAAAGTGGATTTGACTGTTGTTTTGGACATAATGAACACTCCTGGTGTCTTTACTGCAGTGATGAGGTTTACTC
1:57580679-57581229_248	GTTGTTTTGGACATAATGAACACTCCTGGTGTCTTTACTGCAGTGATGAGGTTTACTCTGTCTGGGACAATAATAAGAGCGTTGATGTATTTGGTCCTTCATCTCGTACTAATAGAGTAG
1:57580679-57581229_310	TGGGACAATAATAAGAGCGTTGATGTATTTGGTCCTTCATCTCGTACTAATAGAGTAGGAGTGTATGTGGACGTGCCGTCCGGCTGTCTGTCTTTCTACAGTGTCTCTGACACAAACACA
1:57580679-57581229_372	GTATGTGGACGTGCCGTCCGGCTGTCTGTCTTTCTACAGTGTCTCTGACACAAACACACTCACACACATACACACATTCAACATCGCATTCACTGAAGAGCTCTATGCTGGATTTAAGGT
1:57580679-57581229_430	CTCACACACATACACACATTCAACATCGCATTCACTGAAGAGCTCTATGCTGGATTTAAGGTTTATCCTGGATCTTCGGTGTCTCTGTGTCCTGTTGAACCTGCTGAAGTTCCTCCCTAA
1:57588298-57590053_0	AATGGATAATATGTTACAGAGAATTAAAAATCAGCACAAAACCAGCCTGAAAAATAAGTATGAGAGATTATTTGAAGGAATCGAAGTAAAAGAGACTGGAACCCACCTGAACCGGATCTA
1:57588298-57590053_63	GAGATTATTTGAAGGAATCGAAGTAAAAGAGACTGGAACCCACCTGAACCGGATCTACACCCAGCTGTACATCCTAGAGGGAGAGAGTGAAGGAGTGAATGAAGAACATGAGGTTTTACA
1:57588298-57590053_126	GCTGTACATCCTAGAGGGAGAGAGTGAAGGAGTGAATGAAGAACATGAGGTTTTACAGATGGAGAAAACAGCCAGAACAAAACACTCCCAACACACTCCAATCTACTGCAATGACATCTT
1:57588298-57590053_189	GAAAACAGCCAGAACAAAACACTCCCAACACACTCCAATCTACTGCAATGACATCTTTAAAGAGGAGAAAGAGCAAATCAAGACTGTTCTTACTAAAGGCATCGCTGGAATCGGAAAAAC
1:57588298-57590053_252	GGAGAAAGAGCAAATCAAGACTGTTCTTACTAAAGGCATCGCTGGAATCGGAAAAACCGTCTCTGTGCAGAAGTTCATTCTGGACTGGGCCGAGGGAAAAGCCAATCAGGATGTAGATTT
1:57588298-57590053_315	TGTGCAGAAGTTCATTCTGGACTGGGCCGAGGGAAAAGCCAATCAGGATGTAGATTTCATGTTTGTGCTTCCATTTCGAGAGCTGAACTTGATCAGAGATCATCAGTACAGTCTTCACAG
1:57588298-57590053_378	TGTGCTTCCATTTCGAGAGCTGAACTTGATCAGAGATCATCAGTACAGTCTTCACAGACTTCTGCTGGACTTTCATCCTGAACTTGAAGATCTGGAGCCCAAGATTTATGAGGAGTGTAA
1:57588298-57590053_441	GCTGGACTTTCATCCTGAACTTGAAGATCTGGAGCCCAAGATTTATGAGGAGTGTAAAGTTGTGTTCATCTTTGATGGTCTGGATGAAAGCAGAATCACACTGATGTTTTCAGACGCTCA
1:57588298-57590053_504	GTTCATCTTTGATGGTCTGGATGAAAGCAGAATCACACTGATGTTTTCAGACGCTCAGAAAGTTTGTGATGTGACTGAGACTTCATCAGTGGCTGTGTTGATGTCAAAGCTGATGAAAGG
1:57588298-57590053_567	TTGTGATGTGACTGAGACTTCATCAGTGGCTGTGTTGATGTCAAAGCTGATGAAAGGAGAGCTGCTTCCCTCTGCTCTCATCTGGATCACCTCCAGACCAGCAGCAGCCAATCAGATCCC
1:57588298-57590053_630	GCTTCCCTCTGCTCTCATCTGGATCACCTCCAGACCAGCAGCAGCCAATCAGATCCCCTCCAAATACATCAAGCGTCTGACAGAAATTCAGGGATTCACTGAGCCTCAGAAGGAGGAATA
1:57588298-57590053_693	ATACATCAAGCGTCTGACAGAAATTCAGGGATTCACTGAGCCTCAGAAGGAGGAATATTTCAGGAAGAGAATCAGTGAGCAGCATCAAGCCAGCAGAATCATCTCACACATCAGAAGAGC
1:57588298-57590053_756	GAAGAGAATCAGTGAGCAGCATCAAGCCAGCAGAATCATCTCACACATCAGAAGAGCAAGAAGCCTCCACATCATGTGCCACATACCCGTCTTCTGCTGGATCTCATCCACTGTGCTTCA
1:57588298-57590053_819	CCTCCACATCATGTGCCACATACCCGTCTTCTGCTGGATCTCATCCACTGTGCTTCAGAAGCTCCTGGAAGAAGATCTGAGTGCAGAAATCCCTCAAACTCTGACTGAAATGTACATCCA
1:57588298-57590053_882	CCTGGAAGAAGATCTGAGTGCAGAAATCCCTCAAACTCTGACTGAAATGTACATCCACTTCCTGCTGATTCAGATCAACATGAGGAATCAGAAGTATGAAGAGAGAGATCCAGAGAATCT
1:57588298-57590053_945	GCTGATTCAGATCAACATGAGGAATCAGAAGTATGAAGAGAGAGATCCAGAGAATCTCCTGCAGTCCAACAGAGAAGTGATTGTCAAACTTGCTGAAGTGGCTTTCAGACAGCTGATGAA
1:57588298-57590053_1008	GTCCAACAGAGAAGTGATTGTCAAACTTGCTGAAGTGGCTTTCAGACAGCTGATGAAGGGCAATGTGATGTTCTATGAGGAGGACCTGATTGAGAGCGGCATAGACGTCTCTGACGCCTC
1:57588298-57590053_1071	TGTGATGTTCTATGAGGAGGACCTGATTGAGAGCGGCATAGACGTCTCTGACGCCTCAGTGTATTCTGGGATTTGCACTGAGATCTTAAAGGAGGAATCTGTGATTCAGCAGAGGAAAGT
1:57588298-57590053_1134	TTCTGGGATTTGCACTGAGATCTTAAAGGAGGAATCTGTGATTCAGCAGAGGAAAGTCTACAGCTTCATCCATCTGAGCTTCCAGGAGTTCCTCGCTGCTTTCCATGTATTTTACCACCA
1:57588298-57590053_1197	CTTCATCCATCTGAGCTTCCAGGAGTTCCTCGCTGCTTTCCATGTATTTTACCACCACATAACCTGCTCCACAGAGGCAAGTTTAGATTCACTGCATGATTTGCAGAAAAGAATTATAAA
1:57590952-57591481_0	TGCCTGTGTTCTCACTCTGGATCCAAACACAGCACACACTCATCTTGTTCTGTCTGAAAAGAACAGACAGGCCAGAAATGTAACAGATCCTCAGCCGTATCCTGATCATCCAGACAGATT
1:57590952-57591481_59	AGAACAGACAGGCCAGAAATGTAACAGATCCTCAGCCGTATCCTGATCATCCAGACAGATTTAAGAACAATGAGCAGGTTCTGTGTAGAGAGACTCTGACTGGACGCTGTTACTGGGAGG
1:57590952-57591481_118	TTTAAGAACAATGAGCAGGTTCTGTGTAGAGAGACTCTGACTGGACGCTGTTACTGGGAGGTGAAATGGAGCGGCTCTGGTCATATTGGGGTGGCTTATAAAGCAATCGACAGGAAAAGT
1:57590952-57591481_177	GGTGAAATGGAGCGGCTCTGGTCATATTGGGGTGGCTTATAAAGCAATCGACAGGAAAAGTGGGCTTGACTCTTGGTTTGGACTCAATGAAAACTCTTGGAGTCTGTACAGCTGTGATAC
1:57590952-57591481_236	GTGGGCTTGACTCTTGGTTTGGACTCAATGAAAACTCTTGGAGTCTGTACAGCTGTGATACGATTTACACAGTCTGGCACAATAATAAGAGCGCTGATATTATTGCTCCTTCAGCTTGTA
1:57590952-57591481_295	ACGATTTACACAGTCTGGCACAATAATAAGAGCGCTGATATTATTGCTCCTTCAGCTTGTACTAATAGAGTAGGAGTGTATGTGGATGTGCCATCTGGCTCTCTGTCTTTTTACAGTGTC
1:57590952-57591481_354	TACTAATAGAGTAGGAGTGTATGTGGATGTGCCATCTGGCTCTCTGTCTTTTTACAGTGTCACTGACACACACACACTCACACTCATACACACATTCAACACCACATTCACTGAAGAGCT
1:57590952-57591481_409	AGTGTCACTGACACACACACACTCACACTCATACACACATTCAACACCACATTCACTGAAGAGCTCTATACAGGATTTGGGATTTATCCTGAAGCTTCAGTGTCTCTGTGTCAGATTTAA
1:57618698-57620528_0	CACTTCTATCAGGAGGTGTGATATACATGAGCGATGTGTGAACATTACACAGAGCAACAGTGGATCACAAACACTGAAGACAAGAGACCTACAGAGAGTCAAAGACCAGCTCAAAACCAG
1:57618698-57620528_62	GATCACAAACACTGAAGACAAGAGACCTACAGAGAGTCAAAGACCAGCTCAAAACCAGCATGAAGAACAAGTATGAGCTGTTATCTGAAGGAATTAAAGTAAAAGAGAATCAAACCCACC
1:57618698-57620528_124	AAGAACAAGTATGAGCTGTTATCTGAAGGAATTAAAGTAAAAGAGAATCAAACCCACCTGAAGCGGATCTACACCCAGCTGTACATCATAGAAGGAGAGAGAGAAGGAGTGAATGAAGAA
1:57618698-57620528_186	GCGGATCTACACCCAGCTGTACATCATAGAAGGAGAGAGAGAAGGAGTGAATGAAGAACATGAGGTTTTACAGATGGAGAAAACAGCCAGAACAAAACACTCCCAACACACTCCAATCTA
1:57618698-57620528_248	AGGTTTTACAGATGGAGAAAACAGCCAGAACAAAACACTCCCAACACACTCCAATCTACTGCAATGACATCTTTAAAGAGGAGAAAGAGCAAATCAAGACTGTTCTTACTAAAGGCATCG
1:57618698-57620528_310	AATGACATCTTTAAAGAGGAGAAAGAGCAAATCAAGACTGTTCTTACTAAAGGCATCGCTGGAATCGGAAAAACCGTCTCTGTGCAGAAGTTCATTCTGGACTGGGCCGAGGGAAAAGCC
1:57618698-57620528_372	AATCGGAAAAACCGTCTCTGTGCAGAAGTTCATTCTGGACTGGGCCGAGGGAAAAGCCAATCAGGATGTAGATTTCATGTTTGTGCTTCCATTTCGAGAGCTGAACTTGATCAGAGATCA
1:57618698-57620528_434	AGGATGTAGATTTCATGTTTGTGCTTCCATTTCGAGAGCTGAACTTGATCAGAGATCATCAGTACAGTCTTCACACACTTCTGCTGGACTTTCATCCTGAACTTGAAGATCTGGAGCCCA
1:57618698-57620528_496	TACAGTCTTCACACACTTCTGCTGGACTTTCATCCTGAACTTGAAGATCTGGAGCCCAAGATTTATGAGGAGTGTAAAGTTGTGTTCATCTTTGATGGTCTGGATGAAAGCAGAATCACA
1:57618698-57620528_558	TTATGAGGAGTGTAAAGTTGTGTTCATCTTTGATGGTCTGGATGAAAGCAGAATCACACTGATGTTTTCAGACGCTCAGAAAGTTTGTGATGTGACTGAGACTTCATCAGTGGCTGTGTT
1:57618698-57620528_620	TGTTTTCAGACGCTCAGAAAGTTTGTGATGTGACTGAGACTTCATCAGTGGCTGTGTTGATGTCAAAGCTGATGAAAGGAGAGCTGCTTCCCTCTGCTCTCATCTGGATCACCTCCAGAC
1:57618698-57620528_682	TCAAAGCTGATGAAAGGAGAGCTGCTTCCCTCTGCTCTCATCTGGATCACCTCCAGACCAGCAGCAGCCAATCAGATCCCCTCCAAATACATCAAGCGTCTGACAGAAATTCAGGGATTC
1:57618698-57620528_744	AGCAGCCAATCAGATCCCCTCCAAATACATCAAGCGTCTGACAGAAATTCAGGGATTCACTGAGCCTCAGAAGGAGGAATATTTCAGGAAGAGAATCAGTGAGCAGCATCAAGCCAGCAG
1:57618698-57620528_806	AGCCTCAGAAGGAGGAATATTTCAGGAAGAGAATCAGTGAGCAGCATCAAGCCAGCAGAATCATCTCACACATCAGAAGAGCAAGAAGCCTCCACATCATGTGCCACATACCCGTCTTCT
1:57618698-57620528_868	ATCTCACACATCAGAAGAGCAAGAAGCCTCCACATCATGTGCCACATACCCGTCTTCTGCTGGATCTCATCCACTGTGCTTCAGAAGCTCCTGGAAGAAGATCTGAGTGCAGAAATCCCT
1:57618698-57620528_930	GATCTCATCCACTGTGCTTCAGAAGCTCCTGGAAGAAGATCTGAGTGCAGAAATCCCTCAAACTCTGACTGAAATGTACATCCACTTCCTGCTGATTCAGATCAACATGAGGAATCAGAA
1:57618698-57620528_992	CTCTGACTGAAATGTACATCCACTTCCTGCTGATTCAGATCAACATGAGGAATCAGAAGTATGAAGAGAGAGATCCAGAGAAACTCCTGCAGTCCAACAGAGAAGTGATTGTCAAACTTG
1:57618698-57620528_1054	GAAGAGAGAGATCCAGAGAAACTCCTGCAGTCCAACAGAGAAGTGATTGTCAAACTTGCTGAAGTGGCTTTCAGACAGCTGATGAAGGGCAATGTGATGTTCTATGAGGAGGACCTGATT
1:57618698-57620528_1116	AGTGGCTTTCAGACAGCTGATGAAGGGCAATGTGATGTTCTATGAGGAGGACCTGATTGAGAGCGGCATCGACATCTGTGAGGCCTCAGTGTATTCTGGGATTTGCACTGAGATCTTTAA
1:57618698-57620528_1178	GCGGCATCGACATCTGTGAGGCCTCAGTGTATTCTGGGATTTGCACTGAGATCTTTAAGGAGGAATCTGTGATTCAGCAGAGGAAAGTCTACAGCTTCATCCATCTGAGTGTTCAGGAGT
1:57618698-57620528_1240	GAATCTGTGATTCAGCAGAGGAAAGTCTACAGCTTCATCCATCTGAGTGTTCAGGAGTTTCTGGCTGCTTTCTATGTTTTTTACATTCATGTAAGCAGCACTACAGAAGCATCTTTTGAT
1:57618698-57620528_1302	GGCTGCTTTCTATGTTTTTTACATTCATGTAAGCAGCACTACAGAAGCATCTTTTGATTCACTAGAAAATCTCCATAAAAGAATCATTAATAAAGCCATTGAGAGTGAGAATGGTCATCT
1:57621728-57622257_0	TGCCTGCTTTCTCACACTGGATCCAAACACAGCACACAATCAACTTCAAGTGTCTGAGGGAAACAGAAAGGCAGTGCATATGAAAGATCCTCAGCCGTACCCTAATCATCCAGACAGATT
1:57621728-57622257_59	GAAACAGAAAGGCAGTGCATATGAAAGATCCTCAGCCGTACCCTAATCATCCAGACAGATTTGAGCTACAGGAGCAGGTTCTGTGTAAAGAGACTCTGACTGGACGCTGTTACTGGGAGT
1:57621728-57622257_118	TTTGAGCTACAGGAGCAGGTTCTGTGTAAAGAGACTCTGACTGGACGCTGTTACTGGGAGTCTAAATGGAGTGGATCTGGTTATGTAGCAGTGGCCTATAAAGCGATCGACAGGAAAGGA
1:57621728-57622257_177	GTCTAAATGGAGTGGATCTGGTTATGTAGCAGTGGCCTATAAAGCGATCGACAGGAAAGGAGGGCTTGAATCTTGGTTTGGACTCAACGAAAGGTCCTGGAGTATTTACTGCTCCAATAT
1:57621728-57622257_236	GAGGGCTTGAATCTTGGTTTGGACTCAACGAAAGGTCCTGGAGTATTTACTGCTCCAATATAAATTACACTGCCTGGCACAATAACGAGGGCACTGATATTATTGCTCCTTCCTCTCGCA
1:57621728-57622257_295	ATAAATTACACTGCCTGGCACAATAACGAGGGCACTGATATTATTGCTCCTTCCTCTCGCAATAATAGAGTAGGAGTGTATGTGGACGTGCCGTCCGGTTCTATGTCCTTCTACAGTGTC
1:57621728-57622257_354	CAATAATAGAGTAGGAGTGTATGTGGACGTGCCGTCCGGTTCTATGTCCTTCTACAGTGTCTCTGACACAAACACACTCACACACTTACACACATTCAACACCACATTCACCGAAGACAT
1:57621728-57622257_409	AGTGTCTCTGACACAAACACACTCACACACTTACACACATTCAACACCACATTCACCGAAGACATCTATGCAGGATTCAGGATATATCCTAAATCTTCAGTGTCTCTGTGTCAGATTTAA
1:57627511-57629331_0	AAATGTCAAAATCAGAGACACATGATCCAGGAGAACACAGAAACAGTCTTACAGAGACAAACATTAGAGACTGGAGACCTGCAGAGAGTCAAAGACCAGCACAAAACCAGCATGAAGAGG
1:57627511-57629331_63	TTAGAGACTGGAGACCTGCAGAGAGTCAAAGACCAGCACAAAACCAGCATGAAGAGGAAGTATGAGAGATTATTTGAGGGAATCACTCTTCAAGAGACTGGAACCCACCTGAGCCAGATC
1:57627511-57629331_126	GAGAGATTATTTGAGGGAATCACTCTTCAAGAGACTGGAACCCACCTGAGCCAGATCTACACCCAGCTGTACATCCTAGAGGGAGAGAGTGAAGGAGTGAATGAAGAACATGAGGTTTTA
1:57627511-57629331_189	CAGCTGTACATCCTAGAGGGAGAGAGTGAAGGAGTGAATGAAGAACATGAGGTTTTACAGATGGAGAAAACAGCCAGAACAAAACACTCCCAACACACTCCAATCTACTGCAATGACATC
1:57627511-57629331_252	GAGAAAACAGCCAGAACAAAACACTCCCAACACACTCCAATCTACTGCAATGACATCTTTAAAGAGGAGAAAGAGCAAATCAAGACTGTTCTTACTAAAGGCATCGCTGGAATCGGAAAA
1:57627511-57629331_315	GAGGAGAAAGAGCAAATCAAGACTGTTCTTACTAAAGGCATCGCTGGAATCGGAAAAACCGTCTCTGTGCAGAAGTTCATTCTGGACTGGGCCGAGGGAAAAGCCAATCAGGATGTAGAT
1:57627511-57629331_378	TCTGTGCAGAAGTTCATTCTGGACTGGGCCGAGGGAAAAGCCAATCAGGATGTAGATTTCATGTTTGTGCTTCCATTTCGAGAGCTGAACTTGATCAGAGATCATCAGTACAGTCTTCAC
1:57627511-57629331_441	TTTGTGCTTCCATTTCGAGAGCTGAACTTGATCAGAGATCATCAGTACAGTCTTCACACACTTCTGCTGGACTTTCATCCTGAACTTGAAGATCTGGAGCCCAAGATTTATGAGGAGTGT
1:57627511-57629331_504	CTGCTGGACTTTCATCCTGAACTTGAAGATCTGGAGCCCAAGATTTATGAGGAGTGTAAAGTTGTGTTCATCTTTGATGGTCTGGATGAAAGCAGAATCACACTGATGTTTTCAGACGCT
1:57627511-57629331_567	GTGTTCATCTTTGATGGTCTGGATGAAAGCAGAATCACACTGATGTTTTCAGACGCTCAGAAAGTTTGTGATGTGACTGAGACTTCATCAGTGGCTGTGTTGATGTCAAAGCTGATGAAA
1:57627511-57629331_630	GTTTGTGATGTGACTGAGACTTCATCAGTGGCTGTGTTGATGTCAAAGCTGATGAAAGGAGAGCTGCTTCCCTCTGCTCTCATCTGGATCACCTCCAGACCAGCAGCAGCCAATCAGATC
1:57627511-57629331_693	CTGCTTCCCTCTGCTCTCATCTGGATCACCTCCAGACCAGCAGCAGCCAATCAGATCCCCTCCAAATACATCAAGCGTCTGACAGAAATTCAGGGATTCACTGAGCCTCAGAAGGAGGAA
1:57627511-57629331_756	AAATACATCAAGCGTCTGACAGAAATTCAGGGATTCACTGAGCCTCAGAAGGAGGAATATTTCAGGAAGAGAATCAGTGAGCAGCATCAAGCCAGCAGAATCATCTCACACATCAGAAGA
1:57627511-57629331_819	AGGAAGAGAATCAGTGAGCAGCATCAAGCCAGCAGAATCATCTCACACATCAGAAGAGCAAGAAGCCTCCACATCATGTGCCACATACCCGTCTTCTGCTGGATCTCATCCACTGTGCTT
1:57627511-57629331_882	AGCCTCCACATCATGTGCCACATACCCGTCTTCTGCTGGATCTCATCCACTGTGCTTCAGAAGCTCCTGGAAGAAGATCTGAGTGCAGAAATCCCTCAAACTCTGACTGAAATGTACATC
1:57627511-57629331_945	CTCCTGGAAGAAGATCTGAGTGCAGAAATCCCTCAAACTCTGACTGAAATGTACATCCACTTCCTGCTGATTCAGATCAACATGAGGAATCAGAAGTATGAAGAGAGAGATCCAGAGAAA
1:57627511-57629331_1008	CTGCTGATTCAGATCAACATGAGGAATCAGAAGTATGAAGAGAGAGATCCAGAGAAACTCCTGCAGTCCAACAGAGAAGTGATTGTCAAACTTGCTGAAGTGGCTTTCAGACAGCTGATG
1:57627511-57629331_1071	CAGTCCAACAGAGAAGTGATTGTCAAACTTGCTGAAGTGGCTTTCAGACAGCTGATGAAGGGCAATGTGATGTTCTATGAGGAGGACCTGATTGAGAGCGGCGTAGACGTCTCTGACGCC
1:57627511-57629331_1134	AATGTGATGTTCTATGAGGAGGACCTGATTGAGAGCGGCGTAGACGTCTCTGACGCCTCAGTGTATTCTGGGATTTGCACTGAGATCTTTAAGGAGGAATCTGTGATTCAGCAGAGGAAA
1:57627511-57629331_1197	TATTCTGGGATTTGCACTGAGATCTTTAAGGAGGAATCTGTGATTCAGCAGAGGAAAGTCTACAGCTTCATCCATCTGAGTGTTCAGGAGTTTCTGGCTGCTTTATATGTGTTTTACTAC
1:57627511-57629331_1260	AGCTTCATCCATCTGAGTGTTCAGGAGTTTCTGGCTGCTTTATATGTGTTTTACTACCACATAAGCAACACTGCAGAAGCATCTTTGGATTCTCTGCATAATTTACAGATAAGAGCAGTA
1:57627511-57629331_1323	AGCAACACTGCAGAAGCATCTTTGGATTCTCTGCATAATTTACAGATAAGAGCAGTAGATAAAGCCATTGAGAGTGAGAATGGTCATCTGGATCTGTTTCTGCGGTTCCTGCTGGGCGTC
1:57630633-57631177_0	TGCTGTTTTTCTCACTCTGGATCCAAACACAGCACACACTCAACTCATCCTGTCTGAGGGAAACAGAAAGGCAGAATTTGTAAAAGAGCATCAGCCGTATCCTGATCATCCAGACAGATT
1:57630633-57631177_61	AACAGAAAGGCAGAATTTGTAAAAGAGCATCAGCCGTATCCTGATCATCCAGACAGATTTGAGCACCATGAGCAGGTTCTGTGTAAAGAGACTCTGACTGGACGCTGTTACTGGGAGGCT
1:57630633-57631177_122	AGCACCATGAGCAGGTTCTGTGTAAAGAGACTCTGACTGGACGCTGTTACTGGGAGGCTGAATGGAGCAGTTGGTCTTATATTGCAGTCACCTATAGAGGAATTAACAGGAAAGGAGGGA
1:57630633-57631177_183	ATGGAGCAGTTGGTCTTATATTGCAGTCACCTATAGAGGAATTAACAGGAAAGGAGGGAGTGACTCTTGGTTTGGGTACAATGATAAATCCTGGAGCATGTACTGCACTGATGACAGATT
1:57630633-57631177_244	GACTCTTGGTTTGGGTACAATGATAAATCCTGGAGCATGTACTGCACTGATGACAGATTCACAGTCTGGCATAATAATAGGAAAACTGACATCCCCGCTCTATCCAAGTCAAAAAGATTA
1:57630633-57631177_305	CAGTCTGGCATAATAATAGGAAAACTGACATCCCCGCTCTATCCAAGTCAAAAAGATTAGGAGTGTATGTGGACGTTCCATCCGGCTCTCTGTCTTTCTACAGTGTCTCTGACACACACA
1:57630633-57631177_366	AGTGTATGTGGACGTTCCATCCGGCTCTCTGTCTTTCTACAGTGTCTCTGACACACACACACTCACACTCATACACACACTCAACACCACATTCACTGAACCCCTCTATGCTGGATTCAG
1:57630633-57631177_424	ACACTCACACTCATACACACACTCAACACCACATTCACTGAACCCCTCTATGCTGGATTCAGAGTGTTTGAAACGACACTGACTCTGTGTCAGATTAAACAACAACACAAAACACAGTGA
1:57657948-57659797_0	TGAACAGATCTGTGGCGTCCTCTTCATCCCACTTTGAGACACACACTGTTCAGGAAAAAACAGACAAAGGCCTGCAGACACAAATATTTGAGACTGAAGAACTGCAGAGAGTCAAAGACC
1:57657948-57659797_62	GACAAAGGCCTGCAGACACAAATATTTGAGACTGAAGAACTGCAGAGAGTCAAAGACCAGCACAAAACTAGCATGAGGAAGAAGTATGAGCTGTTATCTGAGGGAATTAAAGTAAAAGAG
1:57657948-57659797_124	CAAAACTAGCATGAGGAAGAAGTATGAGCTGTTATCTGAGGGAATTAAAGTAAAAGAGACTGGAACCCAACTGAACCGGATCTACACCCAGCTGTACATCATAGAGGGAGAGAGTGAAGG
1:57657948-57659797_186	GAACCCAACTGAACCGGATCTACACCCAGCTGTACATCATAGAGGGAGAGAGTGAAGGAGTGAATGAAGAACATGAGGTTTTACAGATGGAGAAAACAGCCAGAACAAAACACTCCCAAC
1:57657948-57659797_248	AATGAAGAACATGAGGTTTTACAGATGGAGAAAACAGCCAGAACAAAACACTCCCAACACACTCCAATCTACTGCAATGACATCTTTAAAGAGGAGAAAGAGCAAATCAAGACTGTTCTT
1:57657948-57659797_310	TCCAATCTACTGCAATGACATCTTTAAAGAGGAGAAAGAGCAAATCAAGACTGTTCTTACTAAAGGCATCGCTGGAATCGGAAAAACCGTCTCTGTGCAGAAGTTCATTCTGGACTGGGC
1:57657948-57659797_372	AAGGCATCGCTGGAATCGGAAAAACCGTCTCTGTGCAGAAGTTCATTCTGGACTGGGCCGAGGGAAAAGCCAATCAGGATGTAGATTTCATGTTTGTGCTTCCATTTCGAGAGCTGAACT
1:57657948-57659797_434	GGAAAAGCCAATCAGGATGTAGATTTCATGTTTGTGCTTCCATTTCGAGAGCTGAACTTGATCAGAGATCATCAGTACAGTCTTCACACACTTCTGCTGGACTTTCATCCTGAACTTGAA
1:57657948-57659797_496	CAGAGATCATCAGTACAGTCTTCACACACTTCTGCTGGACTTTCATCCTGAACTTGAAGATCTGGAGCCCAAGATTTATGAGGAGTGTAAAGTTGTGTTCATCTTTGATGGTCTGGATGA
1:57657948-57659797_558	TGGAGCCCAAGATTTATGAGGAGTGTAAAGTTGTGTTCATCTTTGATGGTCTGGATGAAAGCAGAATCACACTGATGTTTTCAGACGCTCAGAAAGTTTGTGATGTGACTGAGACTTCAT
1:57657948-57659797_620	AGAATCACACTGATGTTTTCAGACGCTCAGAAAGTTTGTGATGTGACTGAGACTTCATCAGTGGCTGTGTTGATGTCAAAGCTGATGAAAGGAGAGCTGCTTCCCTCTGCTCTCATCTGG
1:57657948-57659797_682	GGCTGTGTTGATGTCAAAGCTGATGAAAGGAGAGCTGCTTCCCTCTGCTCTCATCTGGATCACCTCCAGACCAGCAGCAGCCAATCAGATCCCCTCCAAATACATCAAGCGTCTGACAGA
1:57657948-57659797_744	CCTCCAGACCAGCAGCAGCCAATCAGATCCCCTCCAAATACATCAAGCGTCTGACAGAAATTCAGGGATTCACTGAGCCTCAGAAGGAGGAATATTTCAGGAAGAGAATCAGTGAGCAGC
1:57657948-57659797_806	CAGGGATTCACTGAGCCTCAGAAGGAGGAATATTTCAGGAAGAGAATCAGTGAGCAGCATCAAGCCAGCAGAATCATCTCACACATCAGAAGAGCAAGAAGCCTCCACATCATGTGCCAC
1:57657948-57659797_868	AGCCAGCAGAATCATCTCACACATCAGAAGAGCAAGAAGCCTCCACATCATGTGCCACATACCCGTCTTCTGCTGGATCTCATCCACTGTGCTTCAGAAGCTCCTGGAAGAAGATCTGAG
1:57657948-57659797_930	CCGTCTTCTGCTGGATCTCATCCACTGTGCTTCAGAAGCTCCTGGAAGAAGATCTGAGTGCAGAAATCCCTCAAACTCTGACTGAAATGTACATCCACTTCCTGCTGATTCAGATCAACA
1:57657948-57659797_992	GAAATCCCTCAAACTCTGACTGAAATGTACATCCACTTCCTGCTGATTCAGATCAACATGAGGAATCAGAAGTATGAAGAGAGAGATCCAGAGAAACTCCTGCAGTCCAACAGAGAAGTG
1:57657948-57659797_1054	GAATCAGAAGTATGAAGAGAGAGATCCAGAGAAACTCCTGCAGTCCAACAGAGAAGTGATTGTCAAACTTGCTGAAGTGGCTTTCAGACAGCTGATGAAGGGCAATGTGATGTTCTATGA
1:57657948-57659797_1116	TCAAACTTGCTGAAGTGGCTTTCAGACAGCTGATGAAGGGCAATGTGATGTTCTATGAGGAGGACCTGATTGAGAGCGGCGTAGACGTCTCTGATGCCTCAGTGTATTCTGGGATTTGCA
1:57657948-57659797_1178	GACCTGATTGAGAGCGGCGTAGACGTCTCTGATGCCTCAGTGTATTCTGGGATTTGCACTGAGATCTTTAAGGAGGAATCTGTGATTCAGCAGAGGAAAGTCTACAGCTTCATCCATCTG
1:57657948-57659797_1240	GATCTTTAAGGAGGAATCTGTGATTCAGCAGAGGAAAGTCTACAGCTTCATCCATCTGAGTGTTCAGGAGTTCCTCGCTGCTTTCTATGTGTTTTACTACCATGTGAACACAACTATGAT
1:57657948-57659797_1302	TTCAGGAGTTCCTCGCTGCTTTCTATGTGTTTTACTACCATGTGAACACAACTATGATGGGTCTGAAGACATTTGCTTCATTGCAAAAATTGCTTAAAGGTGCAGTAGATGATGCCATTG
1:57661058-57661587_0	TGCCTGTTTCCTCACACTGGATCCAAACACAGCACATGTTCAAATCCAACTATCTGAGGGAAACAGAGAGGCCAGAAATGTGAAAGATCCTCAGCCGTATCCTGATCATCCAGACAGATT
1:57661058-57661587_59	GAAACAGAGAGGCCAGAAATGTGAAAGATCCTCAGCCGTATCCTGATCATCCAGACAGATTTGATCAACAGGAGCAGGTTCTGTGTAGAGAGACTCTGACTGGACGCTGTTACTGGGAGG
1:57661058-57661587_118	TTTGATCAACAGGAGCAGGTTCTGTGTAGAGAGACTCTGACTGGACGCTGTTACTGGGAGGTGAAATGGAGCGGCTCTGGTCATATTGGGGTGGCTTATAAAGCGATCGACAGGAAAAGT
1:57661058-57661587_177	GGTGAAATGGAGCGGCTCTGGTCATATTGGGGTGGCTTATAAAGCGATCGACAGGAAAAGTGGGCTTGACTCTTGGTTTGGACTCAATGAAAACTCCTGGAGTCTGTACTGCTGTGATAC
1:57661058-57661587_236	GTGGGCTTGACTCTTGGTTTGGACTCAATGAAAACTCCTGGAGTCTGTACTGCTGTGATACGAATTACACAGTCTGGTACAACAACGAGAGCGCTGATATTATTGCTCCTTCAGCTCGTA
1:57661058-57661587_295	ACGAATTACACAGTCTGGTACAACAACGAGAGCGCTGATATTATTGCTCCTTCAGCTCGTACCAATAGAGTAGGAGTGTATCTGGACGTTTCATCCGGCTCTCTGTCCTTCTACACCGTC
1:57661058-57661587_354	TACCAATAGAGTAGGAGTGTATCTGGACGTTTCATCCGGCTCTCTGTCCTTCTACACCGTCTCTGACGCAAACACACTCACACTCATACACACATTCAACACCACATTCACTGAACCCCT
1:57661058-57661587_409	ACCGTCTCTGACGCAAACACACTCACACTCATACACACATTCAACACCACATTCACTGAACCCCTCTACACAGGATTTGGGCTTTATCCTGAGTCTTCAGTGTCTCTGTGTCAGATTTAA
1:57709246-57711120_0	TTTAGCAGTCAAAAGAAACCTAAGGTGGTCGGATCTGTCCAGTCTTCTACATCCAAAAATCAGACTCGTGTCATTCAGGAAAATACAGAAACACCCCTGCAGAGACAAACACTAGAGACT
1:57709246-57711120_63	ACTCGTGTCATTCAGGAAAATACAGAAACACCCCTGCAGAGACAAACACTAGAGACTGGAGACCTGCAGAGAGTCAAAGATCAGCACAAATCCAGCATGAAGAATAAATATGAGAGATTA
1:57709246-57711120_126	CTGCAGAGAGTCAAAGATCAGCACAAATCCAGCATGAAGAATAAATATGAGAGATTACTTGAGGGAAACAAACCCAATCAGAATGAAACCCTCCTGAACCGGATCTACACCCAGCTGTAC
1:57709246-57711120_189	GGAAACAAACCCAATCAGAATGAAACCCTCCTGAACCGGATCTACACCCAGCTGTACATCCTAGAGGGAGAGAGTGAAGGAGTGAATGAAGAACATGAGGTTTTACAGATGGAGAAAACA
1:57709246-57711120_252	GAGGGAGAGAGTGAAGGAGTGAATGAAGAACATGAGGTTTTACAGATGGAGAAAACAGCCAGAACAAAACACTCCCAACACACTCCAATCTACTGCAATGACATCTTTAAAGAGGAGAAA
1:57709246-57711120_315	ACAAAACACTCCCAACACACTCCAATCTACTGCAATGACATCTTTAAAGAGGAGAAAGAGCAAATCAAGACTGTTCTTACTAAAGGCATCGCTGGAATCGGAAAAACCGTCTCTGTGCAG
1:57709246-57711120_378	ATCAAGACTGTTCTTACTAAAGGCATCGCTGGAATCGGAAAAACCGTCTCTGTGCAGAAGTTCATTCTGGACTGGGCCGAGGGAAAAGCCAATCAGGATGTAGATTTCATGTTTGTGCTT
1:57709246-57711120_441	ATTCTGGACTGGGCCGAGGGAAAAGCCAATCAGGATGTAGATTTCATGTTTGTGCTTCCATTTCGAGAGCTGAACTTGATCAGAGATCATCAGTACAGTCTTCACACACTTCTGCTGGAC
1:57709246-57711120_504	CGAGAGCTGAACTTGATCAGAGATCATCAGTACAGTCTTCACACACTTCTGCTGGACTTTCATCCTGAACTTGAAGATCTGGAGCCCAAGATTTATGAGGAGTGTAAAGTTGTGTTCATC
1:57709246-57711120_567	CCTGAACTTGAAGATCTGGAGCCCAAGATTTATGAGGAGTGTAAAGTTGTGTTCATCTTTGATGGTCTGGATGAAAGCAGAATCACACTGATGTTTTCAGACGCTCCGCAAGTTTGTGAT
1:57709246-57711120_630	GGTCTGGATGAAAGCAGAATCACACTGATGTTTTCAGACGCTCCGCAAGTTTGTGATGTGACTGAGACTTCATCAGTGGCTGTGTTGATGTCAAAGCTGATGAAAGGAGAGCTGCTTCCC
1:57709246-57711120_693	GAGACTTCATCAGTGGCTGTGTTGATGTCAAAGCTGATGAAAGGAGAGCTGCTTCCCTCTGCTCTCATCTGGATCACCTCCAGACCAGCAGCAGCCAATCAGATCCCCTCCAAATACATC
1:57709246-57711120_756	CTCATCTGGATCACCTCCAGACCAGCAGCAGCCAATCAGATCCCCTCCAAATACATCAAGCGTCTGACAGAAATTCAGGGATTCACTGAGCCTCAGAAGGAGGAATATTTCAGGAAGAGA
1:57709246-57711120_819	CTGACAGAAATTCAGGGATTCACTGAGCCTCAGAAGGAGGAATATTTCAGGAAGAGAATCAGTGAGCAGCATCAAGCCAGCAGAATCATCTCACACATCAGAAGAGCAAGAAGCCTCCAC
1:57709246-57711120_882	GAGCAGCATCAAGCCAGCAGAATCATCTCACACATCAGAAGAGCAAGAAGCCTCCACATCATGTGCCACATACCCGTCTTCTGCTGGATCTCATCCACTGTGCTTCAGAAGCTCCTGGAA
1:57709246-57711120_945	TGCCACATACCCGTCTTCTGCTGGATCTCATCCACTGTGCTTCAGAAGCTCCTGGAAGAAGATCTGAGTGCAGAAATCCCTCAAACTCTGACTGAAATGTACATCCACTTCCTGCTGATT
1:57709246-57711120_1008	CTGAGTGCAGAAATCCCTCAAACTCTGACTGAAATGTACATCCACTTCCTGCTGATTCAGATCAACATGAGGAATCAGAAGTATGAAGAGAGAGATCCAGAGAAACTCCTGCAGTCCAAC
1:57709246-57711120_1071	AACATGAGGAATCAGAAGTATGAAGAGAGAGATCCAGAGAAACTCCTGCAGTCCAACAGAGAAGTGATTGTCAAACTTGCTGAAGTGGCTTTCAGACAGCTGATGAAGGGCAATGTGATG
1:57709246-57711120_1134	GTGATTGTCAAACTTGCTGAAGTGGCTTTCAGACAGCTGATGAAGGGCAATGTGATGTTCTATGAGGAGGACCTGATTGAGAGCGGCGTAGACGTCTCTGAAGCCTCAGTGTATTCTGGG
1:57709246-57711120_1197	GAGGAGGACCTGATTGAGAGCGGCGTAGACGTCTCTGAAGCCTCAGTGTATTCTGGGATTTGCTCTGAGATCTTTAAGGAGGAATCTGTGATTCAGCAGAGGAAAGTCTACAGCTTCATC
1:57709246-57711120_1260	TCTGAGATCTTTAAGGAGGAATCTGTGATTCAGCAGAGGAAAGTCTACAGCTTCATCCATCTGAGTGTTCAGGAGTTCCTGGCTGCTTTCTATGTGTTTTACTACCATTTGAACACAACC
1:57709246-57711120_1323	AGTGTTCAGGAGTTCCTGGCTGCTTTCTATGTGTTTTACTACCATTTGAACACAACCATGGTGGTACTGAAGAAATTTGCTTCATTGCACAACCTACTTAAAGGTGCAGTAGATGAAGCC
1:57714736-57715265_0	TGCCGTTAATCTCACACTGGATCCAAACACAGCACACACTCAACTCATCCTGTCTGATGAAAACAAAACAGTAAGATGTGTGGCAGATTCTCAGCCGTATCCTGATCATCCAGACAGATT
1:57714736-57715265_59	AAAACAAAACAGTAAGATGTGTGGCAGATTCTCAGCCGTATCCTGATCATCCAGACAGATTTAAGACCAATGAGCAGGTTCTGTGTAGAGAGCCTCTGACTGGACGCTGTTACTGGGAGG
1:57714736-57715265_118	TTTAAGACCAATGAGCAGGTTCTGTGTAGAGAGCCTCTGACTGGACGCTGTTACTGGGAGGTGAAATGGAGCGGCTCTGGTCATATTGGAGTAGCTTATTTTGGCATCGACAGGGAAAAT
1:57714736-57715265_177	GGTGAAATGGAGCGGCTCTGGTCATATTGGAGTAGCTTATTTTGGCATCGACAGGGAAAATGGGCTTGAATCTTGGTTTGGACTCAATGAAAACTCATGGAGTCTGTACTGCAGTGATAG
1:57714736-57715265_236	ATGGGCTTGAATCTTGGTTTGGACTCAATGAAAACTCATGGAGTCTGTACTGCAGTGATAGAAATTACACAGTCTGGCACAGAAATAAGAGCGCTGATATTATTGCTCCTTCATCTAGTA
1:57714736-57715265_295	AGAAATTACACAGTCTGGCACAGAAATAAGAGCGCTGATATTATTGCTCCTTCATCTAGTACTAATAGAGTAGGAGTGTATGTGGACGTGCCAACCGGCTCTCTGTCTTTCTACAGCGTC
1:57714736-57715265_354	TACTAATAGAGTAGGAGTGTATGTGGACGTGCCAACCGGCTCTCTGTCTTTCTACAGCGTCTCTGACACAAACACACCCACACTCATACACACATTCAACACCACATTCTCTGAACCCCT
1:57714736-57715265_409	AGCGTCTCTGACACAAACACACCCACACTCATACACACATTCAACACCACATTCTCTGAACCCCTCTATACAGGATTTAGCATTTATCCTGAATCTTCAGTGACTCTGTGTCAGATTTAA
1:57720812-57722583_0	CCAGCAAACACAAGATTGAAAACATGCAGAGAGTCAAAGACAAGCACAAAGCCATCATGAGGAACAAGTATGATAGATTATATGAAGGAATCAAACTACAAGAGACCGAAACCCTCCTAA
1:57720812-57722583_62	AACAAGTATGATAGATTATATGAAGGAATCAAACTACAAGAGACCGAAACCCTCCTAAACCGTATCTACACCCAGCTGTACATCATAGAGGGAGAGAGTGAAGGAGTGAATGAAGAACAT
1:57720812-57722583_124	TATCTACACCCAGCTGTACATCATAGAGGGAGAGAGTGAAGGAGTGAATGAAGAACATGAGGTTTTACAGATGGAGAAAACAGCCAGAACAAAACACTCCCAACACACTCCAATCTACTG
1:57720812-57722583_186	TTTTACAGATGGAGAAAACAGCCAGAACAAAACACTCCCAACACACTCCAATCTACTGCAATGACATCTTTAAAGAGGAGAAAGAGCAAATCAAGACTGTTCTTACTAAAGGCATCGCTG
1:57720812-57722583_248	GACATCTTTAAAGAGGAGAAAGAGCAAATCAAGACTGTTCTTACTAAAGGCATCGCTGGAATCGGAAAAACCGTCTCTGTGCAGAAGTTCATTCTGGACTGGGCCGAGGGAAAAGCCAAT
1:57720812-57722583_310	CGGAAAAACCGTCTCTGTGCAGAAGTTCATTCTGGACTGGGCCGAGGGAAAAGCCAATCAGGATGTAGATTTCATGTTTGTGCTTCCATTTCGAGAGCTGAACTTGATCAGAGATCATCA
1:57720812-57722583_372	ATGTAGATTTCATGTTTGTGCTTCCATTTCGAGAGCTGAACTTGATCAGAGATCATCAGTACAGTCTTCACACACTTCTGCTGGACTTTCATCCTGAACTTGAAGATCTGGAGCCCAAGA
1:57720812-57722583_434	AGTCTTCACACACTTCTGCTGGACTTTCATCCTGAACTTGAAGATCTGGAGCCCAAGATTTATGAGGAGTGTAAAGTTGTGTTCATCTTTGATGGTCTGGATGAAAGCAGAATCACACTG
1:57720812-57722583_496	TGAGGAGTGTAAAGTTGTGTTCATCTTTGATGGTCTGGATGAAAGCAGAATCACACTGATGTTTTCAGACGCTCAGAAAGTTTGTGATGTGACTGAGACTTCATCAGTGGCTGTGTTGAT
1:57720812-57722583_558	TTTCAGACGCTCAGAAAGTTTGTGATGTGACTGAGACTTCATCAGTGGCTGTGTTGATGTCAAAGCTGATGAAAGGAGAGCTGCTTCCCTCTGCTCTCATCTGGATCACCTCCAGACCAG
1:57720812-57722583_620	AAGCTGATGAAAGGAGAGCTGCTTCCCTCTGCTCTCATCTGGATCACCTCCAGACCAGCAGCAGCCAATCAGATCCCCTCCAAATACATCAAGCGTCTGACAGAAATTCAGGGATTCACT
1:57720812-57722583_682	AGCCAATCAGATCCCCTCCAAATACATCAAGCGTCTGACAGAAATTCAGGGATTCACTGAGCCTCAGAAGGAGGAATATTTCAGGAAGAGAATCAGTGAGCAGCATCAAGCCAGCAGAAT
1:57720812-57722583_744	CTCAGAAGGAGGAATATTTCAGGAAGAGAATCAGTGAGCAGCATCAAGCCAGCAGAATCATCTCACACATCAGAAGAGCAAGAAGCCTCCACATCATGTGCCACATACCCGTCTTCTGCT
1:57720812-57722583_806	TCACACATCAGAAGAGCAAGAAGCCTCCACATCATGTGCCACATACCCGTCTTCTGCTGGATCTCATCCACTGTGCTTCAGAAGCTCCTGGAAGAAGATCTGAGTGCAGAAATCCCTCAA
1:57720812-57722583_868	CTCATCCACTGTGCTTCAGAAGCTCCTGGAAGAAGATCTGAGTGCAGAAATCCCTCAAACTCTGACTGAAATGTACATCCACTTCCTGCTGATTCAGATCAACATGAGGAATCAGAAGTA
1:57720812-57722583_930	TGACTGAAATGTACATCCACTTCCTGCTGATTCAGATCAACATGAGGAATCAGAAGTATGAAGAGAGAGATCCAGAGAAACTCCTGCAGTCCAACAGAGAAGTGATTGTCAAACTTGCTG
1:57720812-57722583_992	GAGAGAGATCCAGAGAAACTCCTGCAGTCCAACAGAGAAGTGATTGTCAAACTTGCTGAAGTGGCTTTCAGACAGCTGATGAAGGGCAATGTGATGTTCTATGAGGAGGACCTGATTGAG
1:57720812-57722583_1054	GGCTTTCAGACAGCTGATGAAGGGCAATGTGATGTTCTATGAGGAGGACCTGATTGAGAGCGGTGTAGATGCAGCTCACACCTCAATATATTCTGGGATTTGCACTGAGATCTTTAAGGA
1:57720812-57722583_1116	GTGTAGATGCAGCTCACACCTCAATATATTCTGGGATTTGCACTGAGATCTTTAAGGAGGAATCTGTGATTCAGCAGAGGAAAGTCTACAGCTTCATCCATCTGAGCGTTCAGGAGTTTC
1:57720812-57722583_1178	TCTGTGATTCAGCAGAGGAAAGTCTACAGCTTCATCCATCTGAGCGTTCAGGAGTTTCTGGCTGCATTTTTTGCCTTTTACTATTATTTAAGTACAATTAGAGAAGGACTGAAAAACTTA
1:57720812-57722583_1240	TGCATTTTTTGCCTTTTACTATTATTTAAGTACAATTAGAGAAGGACTGAAAAACTTACTTTCAGTACAAAGTTTGCTTGAAGGTGCAGTTGATAAAGCCATTGAGAGTGAGAGTGGTCA
1:57723643-57724185_0	TGCCTGTTTTCTCACACTGGATCCAAACAGCGCTCACACTCGTCTGATTCTGTCTGAGGAGAACAGGACAGTGGCTCACGTGGAGGATCATCAGCCGTATCCTGATCATCCAGACAGATT
1:57723643-57724185_61	AACAGGACAGTGGCTCACGTGGAGGATCATCAGCCGTATCCTGATCATCCAGACAGATTTGAGAACTATGAGCAGGTTCTGTGTAGAGAGACTCTGACTGGACGCTGTTACTGGGAGGCT
1:57723643-57724185_122	AGAACTATGAGCAGGTTCTGTGTAGAGAGACTCTGACTGGACGCTGTTACTGGGAGGCTGAATGGAGGGGCAAGGGGGCTGGAATTGCAGTGTCATATAAAGGAATCAGCAGGAAAGGAG
1:57723643-57724185_183	ATGGAGGGGCAAGGGGGCTGGAATTGCAGTGTCATATAAAGGAATCAGCAGGAAAGGAGGGAATGACTGTTGGTTTGGATATAGTGACAAATCCTGGAGTCTGTACTGCACTTCAAGTGG
1:57723643-57724185_244	AATGACTGTTGGTTTGGATATAGTGACAAATCCTGGAGTCTGTACTGCACTTCAAGTGGATTCACTGTTTGGCACAATAATGTGAGCTCTAACATATTGATCTCTGTGCCCCAGTCTAAT
1:57723643-57724185_305	TCACTGTTTGGCACAATAATGTGAGCTCTAACATATTGATCTCTGTGCCCCAGTCTAATAGAGTAGGAGTGTATGTGGACGTGCCGTCCGGCTCTCTGTCCTTCTACAGTGTCTCTGACA
1:57723643-57724185_366	AGTAGGAGTGTATGTGGACGTGCCGTCCGGCTCTCTGTCCTTCTACAGTGTCTCTGACACACACACACTCACACACTTACACACATTCAACACCACATTCACTGAAGACCTCTATGCTGG
1:57723643-57724185_422	ACACACACACACTCACACACTTACACACATTCAACACCACATTCACTGAAGACCTCTATGCTGGATTCAGAGTTTATGAATCCTCCGTGTCTCAGTGCAACATTCAGCAATCATAATTTG
1:57727937-57729838_0	AGTAGAAACAGATCAGAGCCTCCAGAACCCAGTGGTATGTCTGTGAAGAGTAACACATCCATGATTGCAGGAGTCAGCTTCAGTGATAAACACTTGATCTCTGACTTTAGGCTGAATGAC
1:57727937-57729838_62	GATTGCAGGAGTCAGCTTCAGTGATAAACACTTGATCTCTGACTTTAGGCTGAATGACACAAAGAGACAAACTAGAGACAAACCAAAGGTTAATAAACTACAGAGAATTAAAGACCAACA
1:57727937-57729838_124	AGAGACAAACTAGAGACAAACCAAAGGTTAATAAACTACAGAGAATTAAAGACCAACACAAAGCCATCATGAAGAGCAAATATGAGAGTTTATTCGAGGGGATCAAACTCCTGAAGAACC
1:57727937-57729838_186	GCCATCATGAAGAGCAAATATGAGAGTTTATTCGAGGGGATCAAACTCCTGAAGAACCAAACCCTCCTGAACCAGATCTACACCCAGCTGTACATCATAGAGGGAGAGAGTGAAGGAGTG
1:57727937-57729838_248	CCTCCTGAACCAGATCTACACCCAGCTGTACATCATAGAGGGAGAGAGTGAAGGAGTGAATGAAGAACATGAGGTTTTACAGATGGAGAAAACAGCCAGAACAAAACACTCCCAACACAC
1:57727937-57729838_310	AAGAACATGAGGTTTTACAGATGGAGAAAACAGCCAGAACAAAACACTCCCAACACACTCCAATCTACTGCAATGACATCTTTAAAGAGGAGAAAGAGCAAATCAAGACTGTTCTTACTA
1:57727937-57729838_372	ATCTACTGCAATGACATCTTTAAAGAGGAGAAAGAGCAAATCAAGACTGTTCTTACTAAAGGCATCGCTGGAATCGGAAAAACCCTCTCTGTGCAGAAGTTCATTCTGGACTGGGCCGAG
1:57727937-57729838_434	CATCGCTGGAATCGGAAAAACCCTCTCTGTGCAGAAGTTCATTCTGGACTGGGCCGAGGGAAAAACCAATCAGGATGTAGATTTCATGTTTGTGCTTCCATTTCGAGAGCTGAACTTGAT
1:57727937-57729838_496	AAACCAATCAGGATGTAGATTTCATGTTTGTGCTTCCATTTCGAGAGCTGAACTTGATCAGAGATCATCAGTACAGTCTTCACACACTTCTGCTGGACTTTCATCCTGAACTTGAAGATC
1:57727937-57729838_558	GATCATCAGTACAGTCTTCACACACTTCTGCTGGACTTTCATCCTGAACTTGAAGATCTGGAGCCCAAGATTTATGAGGAGTGTAAAGTTGTGTTCATCTTTGATGGTCTGGATGAAAGC
1:57727937-57729838_620	GCCCAAGATTTATGAGGAGTGTAAAGTTGTGTTCATCTTTGATGGTCTGGATGAAAGCAGAATCACACTGATGTTTTCAGACGCTCAGAAAGTTTGTGATGTGACTGAGACTTCATCAGT
1:57727937-57729838_682	TCACACTGATGTTTTCAGACGCTCAGAAAGTTTGTGATGTGACTGAGACTTCATCAGTGGCTGTGTTGATGTCAAAGCTGATGAAAGGAGAGCTGCTTCCCTCTGCTCTCATCTGGATCA
1:57727937-57729838_744	GTGTTGATGTCAAAGCTGATGAAAGGAGAGCTGCTTCCCTCTGCTCTCATCTGGATCACCTCCAGACCAGCAGCAGCCAATCAGATCCCCTCCAAATACATCAAGCGTCTGACAGAAATT
1:57727937-57729838_806	CAGACCAGCAGCAGCCAATCAGATCCCCTCCAAATACATCAAGCGTCTGACAGAAATTCAGGGATTCACTGAGCCTCAGAAGGAGGAATATTTCAGGAAGAGAATCAGTGAGCAGCATCA
1:57727937-57729838_868	GATTCACTGAGCCTCAGAAGGAGGAATATTTCAGGAAGAGAATCAGTGAGCAGCATCAAGCCAGCAGAATCATCTCACACATCAGAAGAGCAAGAAGCCTCCACATCATGTGCCACATAC
1:57727937-57729838_930	AGCAGAATCATCTCACACATCAGAAGAGCAAGAAGCCTCCACATCATGTGCCACATACCCGTCTTCTGCTGGATCTCATCCACTGTGCTTCAGAAGCTCCTGGAAGAAGATCTGAGTGCA
1:57727937-57729838_992	CTTCTGCTGGATCTCATCCACTGTGCTTCAGAAGCTCCTGGAAGAAGATCTGAGTGCAGAAATCCCTCAAACTCTGACTGAAATGTACATCCACTTCCTGCTGATTCAGATCAACATGAG
1:57727937-57729838_1054	TCCCTCAAACTCTGACTGAAATGTACATCCACTTCCTGCTGATTCAGATCAACATGAGGAATCAGAAGTATGAAGAGAGAGATCCAGAGAAACTCCTGCAGTCCAACAGAGAAGTGATTG
1:57727937-57729838_1116	CAGAAGTATGAAGAGAGAGATCCAGAGAAACTCCTGCAGTCCAACAGAGAAGTGATTGTCAAACTTGCTGAAGTGGCTTTCAGACAGCTGATGAAGGGCAATGTGATGTTCTATGAGGAG
1:57727937-57729838_1178	ACTTGCTGAAGTGGCTTTCAGACAGCTGATGAAGGGCAATGTGATGTTCTATGAGGAGGACCTGACTGAGAGCGGCGTAGACGTCTCTGAAGCCTCAGTGTATTCTGGGATTTGCACTGA
1:57727937-57729838_1240	TGACTGAGAGCGGCGTAGACGTCTCTGAAGCCTCAGTGTATTCTGGGATTTGCACTGAGATCTTTAAGGAGGAATCTGTGATTCAGCAGAGGAAAGTCTACAGCTTCATCCATCTGAGTG
1:57727937-57729838_1302	TTTAAGGAGGAATCTGTGATTCAGCAGAGGAAAGTCTACAGCTTCATCCATCTGAGTGTTCAGGAGTTCCTCGCTGCTTTCTATGTGTTTTATTATTTCATAAGCCACACCACAGAGCCA
1:57727937-57729838_1364	GGAGTTCCTCGCTGCTTTCTATGTGTTTTATTATTTCATAAGCCACACCACAGAGCCATTTTTAGATTCATTGCATAATTTACATAAGAGAGCAGTAGATAAATCCATTGAGAGTGAGAA
1:57730578-57731125_0	TGCAGTAGATCTCACTCTGGATCCAAACACTGCAAACACTAACATCATCCTGTCTGAGGACAACAGAAAGGCAACATACACAGAAGAGCCACAGCCGTATCCTGATCACCCAGAGAGATT
1:57730578-57731125_61	AACAGAAAGGCAACATACACAGAAGAGCCACAGCCGTATCCTGATCACCCAGAGAGATTTGTTGGTGGTGAACGGGTTCTGTGCCAAGAGAAACTAACTGGGCGCTGTTACTGGGAGGTG
1:57730578-57731125_122	TTGGTGGTGAACGGGTTCTGTGCCAAGAGAAACTAACTGGGCGCTGTTACTGGGAGGTGAAATGGAGTGGATGGGGTCATGCAGCGGTGACGTATAGAGGAATCAGGAGGAAGGGAGGCA
1:57730578-57731125_183	ATGGAGTGGATGGGGTCATGCAGCGGTGACGTATAGAGGAATCAGGAGGAAGGGAGGCAGCTACTGCAGGTTTGGGTACAATGACAAATCCTGGAGTCTGGATTACTCTGATGACAGATT
1:57730578-57731125_244	TACTGCAGGTTTGGGTACAATGACAAATCCTGGAGTCTGGATTACTCTGATGACAGATTCACTGTCTGGCACAATAAAAAGAGAATCGACATACCAGCCCTGTCACCCCAGTCCAATAGA
1:57730578-57731125_305	CTGTCTGGCACAATAAAAAGAGAATCGACATACCAGCCCTGTCACCCCAGTCCAATAGAGTAGGAGTGTATGTGGACGTGCCGTCAGGCTCTCTGTCCTTCTACAGCATCTCTGACACAC
1:57730578-57731125_366	AGGAGTGTATGTGGACGTGCCGTCAGGCTCTCTGTCCTTCTACAGCATCTCTGACACACACACACTCACACACTTACACACATTCAACACCACATTCACTGAAGACCTCTATGCTGGGTT
1:57730578-57731125_427	ACACTCACACACTTACACACATTCAACACCACATTCACTGAAGACCTCTATGCTGGGTTCAGAGTTTATGAGTCTGAACTGTCTTTGTGCCAGAGTACACCACACAGAGACAAATTTTAA
1:57736571-57738439_0	AACAGAGAAATCCATGAACAGACCAAATTGGTGTCGTCAATTAAATTCAACTTACAAACTCACAAAAAACAGGAGAATCAAGAAACAGTTCTTAAGACACAAGCACAGGAAACTGGAGAC
1:57736571-57738439_63	AAAAAACAGGAGAATCAAGAAACAGTTCTTAAGACACAAGCACAGGAAACTGGAGACCTGCAGAGAGTCAAAGACAAACTCAAAACCAGTTTGAAGAAAAAATATGAGAGATTATTTGAG
1:57736571-57738439_126	AGAGTCAAAGACAAACTCAAAACCAGTTTGAAGAAAAAATATGAGAGATTATTTGAGGGAAACACACTCCAAGAGAACCAAACCCTCCTGAACCGGATCTACACCCAGCTGTACATCATA
1:57736571-57738439_189	ACACTCCAAGAGAACCAAACCCTCCTGAACCGGATCTACACCCAGCTGTACATCATAGAGGGAGAGAGTGAAGGAGTGAATGAAGAACATGAGGTTTTACAGATGGAGAAAACAGCCAGA
1:57736571-57738439_252	GAGAGTGAAGGAGTGAATGAAGAACATGAGGTTTTACAGATGGAGAAAACAGCCAGAACAAAACACTCCCAACACACTCCAATCTACTGCAATGACATCTTTAAAGAGGAGAAAGAGCAA
1:57736571-57738439_315	CACTCCCAACACACTCCAATCTACTGCAATGACATCTTTAAAGAGGAGAAAGAGCAAATCAAGACTGTTCTTACTAAAGGCATCGCTGGAATCGGAAAAACCGTCTCTGTGCAGAAGTTC
1:57736571-57738439_378	ACTGTTCTTACTAAAGGCATCGCTGGAATCGGAAAAACCGTCTCTGTGCAGAAGTTCATTCTGGACTGGGCCGAGGGAAAAGCCAATCAGGATGTAGATTTCATGTTTGTGCTTCCATTT
1:57736571-57738439_441	GACTGGGCCGAGGGAAAAGCCAATCAGGATGTAGATTTCATGTTTGTGCTTCCATTTCGAGAGCTGAACTTGATCAGAGATCATCAGTACAGTCTTCACACACTTCTGCTGGACTTTCAT
1:57736571-57738439_504	CTGAACTTGATCAGAGATCATCAGTACAGTCTTCACACACTTCTGCTGGACTTTCATCCTGAACTTGAAGATCTGGAGCCCAAGATTTATGAGGAGTGTAAAGTTGTGTTCATCTTTGAT
1:57736571-57738439_567	CTTGAAGATCTGGAGCCCAAGATTTATGAGGAGTGTAAAGTTGTGTTCATCTTTGATGGTCTGGATGAAAGCAGAATCACACTGATGTTTTCAGACGCTCAGAAAGTTTGTGATGTGACT
1:57736571-57738439_630	GATGAAAGCAGAATCACACTGATGTTTTCAGACGCTCAGAAAGTTTGTGATGTGACTGAGACTTCATCAGTGGCTGTGTTGATGTCAAAGCTGATGAAAGGAGAGCTGCTTCCCTCTGCT
1:57736571-57738439_693	TCATCAGTGGCTGTGTTGATGTCAAAGCTGATGAAAGGAGAGCTGCTTCCCTCTGCTCTCATCTGGATCACCTCCAGACCAGCAGCAGCCAATCAGATCCCCTCCAAATACATCAAGCGT
1:57736571-57738439_756	TGGATCACCTCCAGACCAGCAGCAGCCAATCAGATCCCCTCCAAATACATCAAGCGTCTGACAGAAATTCAGGGATTCACTGAGCCTCAGAAGGAGGAATATTTCAGGAAGAGAATCAGT
1:57736571-57738439_819	GAAATTCAGGGATTCACTGAGCCTCAGAAGGAGGAATATTTCAGGAAGAGAATCAGTGAGCAGCATCAAGCCAGCAGAATCATCTCACACATCAGAAGAGCAAGAAGCCTCCACATCATG
1:57736571-57738439_882	CATCAAGCCAGCAGAATCATCTCACACATCAGAAGAGCAAGAAGCCTCCACATCATGTGCCACATACCCGTCTTCTGCTGGATCTCATCCACTGTGCTTCAGAAGCTCCTGGAAGAAGAT
1:57736571-57738439_945	ATACCCGTCTTCTGCTGGATCTCATCCACTGTGCTTCAGAAGCTCCTGGAAGAAGATCTGAGTGCAGAAATCCCTCAAACTCTGACTGAAATGTACATCCACTTCCTGCTGATTCAGATC
1:57736571-57738439_1008	GCAGAAATCCCTCAAACTCTGACTGAAATGTACATCCACTTCCTGCTGATTCAGATCAACATGAGGAATCAGAAGTATGAAGAGAGAGATCCAGAGAAACTCCTGCAGTCCAACAGAGAA
1:57736571-57738439_1071	AGGAATCAGAAGTATGAAGAGAGAGATCCAGAGAAACTCCTGCAGTCCAACAGAGAAGTGATTGTCAAACTTGCTGAAGTGGCTTTCAGACAGCTGATGAAGGGCAATGTGATGTTCTAT
1:57736571-57738439_1134	GTCAAACTTGCTGAAGTGGCTTTCAGACAGCTGATGAAGGGCAATGTGATGTTCTATGAGGAGGACCTGATTGAGAGCGGCGTAGACGTCTCTGACGCCTCAGTGTATTCTGGGATTTGC
1:57736571-57738439_1197	GACCTGATTGAGAGCGGCGTAGACGTCTCTGACGCCTCAGTGTATTCTGGGATTTGCACTGAGATCTTTAAGGAGGAATCTGTGATTCAGCAGAGGAAAGTCTACAGCTTCATCCATCTG
1:57736571-57738439_1260	ATCTTTAAGGAGGAATCTGTGATTCAGCAGAGGAAAGTCTACAGCTTCATCCATCTGAGTGTTCAGGAGTTCCTCGCTGCTTTCTATGTGTTTTACTACCATGTGAACACAACTATGGAT
1:57736571-57738439_1323	CAGGAGTTCCTCGCTGCTTTCTATGTGTTTTACTACCATGTGAACACAACTATGGATGGACTGAGGAATTTTGCCTCGGTCGAAAACCTGCTTAAAGGTGCTGTAGATAAAACCATTGAG
1:57739510-57740036_0	TGCAGTTAATATCACACTGGATCCAAACACAGCACACAATCAACTCATCCTGTCTGATGGAAACAAAACAGCAACACATGTGACAGATCCTCAGCCGTATCCTGATCATCCAGACAGATT
1:57739510-57740036_58	GGAAACAAAACAGCAACACATGTGACAGATCCTCAGCCGTATCCTGATCATCCAGACAGATTTGATCAACAGGAGCAGGTTCTGTGTAGAGAGACTCTGACTGGACGCTGTTACTGGGAG
1:57739510-57740036_116	GATTTGATCAACAGGAGCAGGTTCTGTGTAGAGAGACTCTGACTGGACGCTGTTACTGGGAGGTGAAATGGAGCGGCTCTGGTCATGTAGGTGTTGCTTATAAAGCGATCGAGAGAAAAA
1:57739510-57740036_174	GGAGGTGAAATGGAGCGGCTCTGGTCATGTAGGTGTTGCTTATAAAGCGATCGAGAGAAAAAGTGGGAGTAATTGTCGATTTGGACGCAATGAACACTCTTGGAGTCTGTACTGCTGTGA
1:57739510-57740036_232	AAAAGTGGGAGTAATTGTCGATTTGGACGCAATGAACACTCTTGGAGTCTGTACTGCTGTGATGAGGTTTACTGTTCCTGGCACAATAACAAGAGTGATGATATTACTGCTCCTTCATCT
1:57739510-57740036_290	GTGATGAGGTTTACTGTTCCTGGCACAATAACAAGAGTGATGATATTACTGCTCCTTCATCTAAGACTAATAGAGTAGGAGTGTATGTGGATGTGCCGGCCGGTTCTCTGTCCTTCTACA
1:57739510-57740036_348	ATCTAAGACTAATAGAGTAGGAGTGTATGTGGATGTGCCGGCCGGTTCTCTGTCCTTCTACAGTGTCTCTGACACACTCACACTCATACACACATTCAACACCACATTCACTGAAGACAT
1:57739510-57740036_406	TACAGTGTCTCTGACACACTCACACTCATACACACATTCAACACCACATTCACTGAAGACATCTATGCTGGATTTGTGGTTTATCCTGCATCTTCAGTGTCTCTTTTGGATATTTAACAA
1:57986552-57988492_0	AAGAAAAACAATCTGATCCAGAGTCAGTCCAGATGTGGAGTTTCCAAGTCCAGACCTACAGAAGACATTGACTGTCCTCAAAACAGAAAGAAATGCAGATGGGGATCCAGTTCTACTGGT
1:57986552-57988492_63	GACATTGACTGTCCTCAAAACAGAAAGAAATGCAGATGGGGATCCAGTTCTACTGGTTCTGCTGACGGCATCACTACAGCAGACCAGCAGGGGAACCCTGGAATCCTGGAGAAACCTTTA
1:57986552-57988492_126	GACGGCATCACTACAGCAGACCAGCAGGGGAACCCTGGAATCCTGGAGAAACCTTTACATGATGAATTACAGAGAGTTAAAGACCAGCACAAAACCAGCATGAAGAATAAATATGAGAGA
1:57986552-57988492_189	GAATTACAGAGAGTTAAAGACCAGCACAAAACCAGCATGAAGAATAAATATGAGAGATTATTTGAGGGAAACAAACTCCAAGAGAGCCAAACCCTCCTGAACCAGATCTACACCCAGCTG
1:57986552-57988492_252	GAGGGAAACAAACTCCAAGAGAGCCAAACCCTCCTGAACCAGATCTACACCCAGCTGTACATCATAGAGGGAGAGAGTGAAGGAGTGAATGAAGAACATGAGGTTTTACAGATGGAGAAA
1:57986552-57988492_315	ATAGAGGGAGAGAGTGAAGGAGTGAATGAAGAACATGAGGTTTTACAGATGGAGAAAACAGCCAGAACAAAACACTCCCAACACACTCCAATCTACTGCAATGACATCTTTAAAGAGGAG
1:57986552-57988492_378	AGAACAAAACACTCCCAACACACTCCAATCTACTGCAATGACATCTTTAAAGAGGAGAAAGAGCAAATCAAGACTGTTCTTACTAAAGGCATCGCTGGAATCGGAAAAACCGTCTCTGTG
1:57986552-57988492_441	CAAATCAAGACTGTTCTTACTAAAGGCATCGCTGGAATCGGAAAAACCGTCTCTGTGCAGAAGTTCATTCTGGACTGGGCCGAGGGAAAAGCCAATCAGGATGTAGATTTCATGTTTGTG
1:57986552-57988492_504	TTCATTCTGGACTGGGCCGAGGGAAAAGCCAATCAGGATGTAGATTTCATGTTTGTGCTTCCATTTCGAGAGCTGAACTTGATCAGAGATCATCAGTACAGTCTTCACACACTTCTGCTG
1:57986552-57988492_567	TTTCGAGAGCTGAACTTGATCAGAGATCATCAGTACAGTCTTCACACACTTCTGCTGGACTTTCATCCTGAACTTGAAGATCTGGAGCCCAAGATTTATGAGGAGTGTAAAGTTGTGTTC
1:57986552-57988492_630	CATCCTGAACTTGAAGATCTGGAGCCCAAGATTTATGAGGAGTGTAAAGTTGTGTTCATCTTTGATGGTCTGGATGAAAGCAGAATCACACTGATGTTTTCAGACGCTCAGAAAGTTTGT
1:57986552-57988492_693	GATGGTCTGGATGAAAGCAGAATCACACTGATGTTTTCAGACGCTCAGAAAGTTTGTGATGTGACTGAGACTTCATCAGTGGCTGTGTTGATGTCAAAGCTGATGAAAGGAGAGCTGCTT
1:57986552-57988492_756	ACTGAGACTTCATCAGTGGCTGTGTTGATGTCAAAGCTGATGAAAGGAGAGCTGCTTCCCTCTGCTCTCATCTGGATCACCTCCAGACCAGCAGCATCCAATCAGATCCCCTCCAAATAC
1:57986552-57988492_819	GCTCTCATCTGGATCACCTCCAGACCAGCAGCATCCAATCAGATCCCCTCCAAATACATCAAGCGTCTGACAGAAATTCAGGGATTCACTGAGCCTCAGAAGGAGGAATATTTCAGGAAG
1:57986552-57988492_882	CGTCTGACAGAAATTCAGGGATTCACTGAGCCTCAGAAGGAGGAATATTTCAGGAAGAGAATCAGTGAGCAGCATCAAGCCAGCAGAATCATCTCACACATCAGAAGAGCAAGAAGCCTC
1:57986552-57988492_945	AGTGAGCAGCATCAAGCCAGCAGAATCATCTCACACATCAGAAGAGCAAGAAGCCTCCACATCATGTGCCACATACCCGTCTTCTGCTGGATCTCATCCACTGTGCTTCAGAAGCTCCTG
1:57986552-57988492_1008	ATGTGCCACATACCCGTCTTCTGCTGGATCTCATCCACTGTGCTTCAGAAGCTCCTGGAAGAAGATCTGAGTGCAGAAATCCCTCAAACTCTGACTGAAATGTACATCCACTTCCTGCTG
1:57986552-57988492_1071	GATCTGAGTGCAGAAATCCCTCAAACTCTGACTGAAATGTACATCCACTTCCTGCTGATTCAGATCAACATGAGGAATCAGAAGTATGAAGAGAGAGATCCAGAGAAACTCCTGCAGTCC
1:57986552-57988492_1134	ATCAACATGAGGAATCAGAAGTATGAAGAGAGAGATCCAGAGAAACTCCTGCAGTCCAACAGAGAAGTGATTGTCAAACTTGCTGAAGTGGCTTTCAGACAGCTGATGAAGGGCAATGTG
1:57986552-57988492_1197	GAAGTGATTGTCAAACTTGCTGAAGTGGCTTTCAGACAGCTGATGAAGGGCAATGTGATGTTCTATGAGGAGGACCTGATTGAGAGCGGCGTAGACGTCTCTGACGCCTCAGTGTATTCT
1:57986552-57988492_1260	TATGAGGAGGACCTGATTGAGAGCGGCGTAGACGTCTCTGACGCCTCAGTGTATTCTGGGATTTGCTCTGAGATCTTTAAGGAAGAATCTGTGATTCAGCAGAGGAAAGTCTACAGCTTC
1:57986552-57988492_1323	TGCTCTGAGATCTTTAAGGAAGAATCTGTGATTCAGCAGAGGAAAGTCTACAGCTTCATCCATCTGAGCGTTCAGGAGTTCCTCGCTGCTTTCTATGTGTTTTACCATTATATAATTAAA
1:57986552-57988492_1386	CTGAGCGTTCAGGAGTTCCTCGCTGCTTTCTATGTGTTTTACCATTATATAATTAAAAATGTTGACATGCTACACTTTATTGATCTATTGCATAATCTGCATAAGGGAGCAGTAGATAAA
1:57990516-57991001_0	TCACACTGGATCCAAACACAGCGAACGCTCAACTTCAGCTTTCTGAGGGAAACAGGAAAGCCACACATGTGAAAGATCCTCAGCAGTATCCCGATCATCCGGAGCGGTTCGATACCTATC
1:57990516-57991001_61	CACACATGTGAAAGATCCTCAGCAGTATCCCGATCATCCGGAGCGGTTCGATACCTATCCTCAGGTCCTGTGTAAAGAGACTCTGACTGGACGCTGTTACTGGGAGGCTGAATGGAACGG
1:57990516-57991001_122	CAGGTCCTGTGTAAAGAGACTCTGACTGGACGCTGTTACTGGGAGGCTGAATGGAACGGACGGGTGACTGGTATAGCCGTGGCATCTAGAGGAATCAGCAGGAAAGGAGTGAGTGACTGT
1:57990516-57991001_183	GGGTGACTGGTATAGCCGTGGCATCTAGAGGAATCAGCAGGAAAGGAGTGAGTGACTGTGTGTTTGGATGGAATGATAAATCCTGGAGTCTCTTCTGCTCTGATAACAGTTATGTTGTTT
1:57990516-57991001_244	GTTTGGATGGAATGATAAATCCTGGAGTCTCTTCTGCTCTGATAACAGTTATGTTGTTTGTCACAATAACGACAGAACGGATATTACCGCCCCTTCACCGCCCTCTAATAGAGTCGGTGT
1:57990516-57991001_305	CACAATAACGACAGAACGGATATTACCGCCCCTTCACCGCCCTCTAATAGAGTCGGTGTCTTTCTAGACGTGCCGTCCGGCTTTGTGTCCTTCTACAGCGTCTCTGACACACACACACTC
1:57990516-57991001_365	TTTCTAGACGTGCCGTCCGGCTTTGTGTCCTTCTACAGCGTCTCTGACACACACACACTCACACACTTACACACATTCAACACCACATTCACCGAACCCCTCTATGCTGGGTTCAGAGTG
1:58011271-58013068_0	TGCTTAAGGAAACTGGTGACCAGCAGAAACCACTATATAATGTTCTTCAAACAGTCAAAGACCAGCACAAAACCAGCATGAAGAACAAATATGAGAGATTATTTGAGGGAAACAAACTAC
1:58011271-58013068_63	AGCACAAAACCAGCATGAAGAACAAATATGAGAGATTATTTGAGGGAAACAAACTACAAGAGAACCAAACCTTGCTGAACCGCATCTACACCCAGCTGTACATCATAGAGGGAGAGAGTG
1:58011271-58013068_126	ACCAAACCTTGCTGAACCGCATCTACACCCAGCTGTACATCATAGAGGGAGAGAGTGAAGGAGTGAATGAAGAACATGAGGTTTTACAGATGGAGAAAACAGCCAGAACAAAACACTCCC
1:58011271-58013068_189	TGAATGAAGAACATGAGGTTTTACAGATGGAGAAAACAGCCAGAACAAAACACTCCCAACACACTCCAATCTACTGCAATGACATCTTTAAAGAGGAGAAAGAGCAAATCAAGACTGTTC
1:58011271-58013068_252	CTCCAATCTACTGCAATGACATCTTTAAAGAGGAGAAAGAGCAAATCAAGACTGTTCTTACTAAAGGCATCGCTGGAATCGGAAAAACCGTCTCTGTGCAGAAGTTCATTCTGGACTGGG
1:58011271-58013068_315	AAGGCATCGCTGGAATCGGAAAAACCGTCTCTGTGCAGAAGTTCATTCTGGACTGGGCCGAGGGAAAAGACAATCAGGATGTAGATTTCATGTTTGTGCTTCCATTTCGAGAGCTGAACT
1:58011271-58013068_378	GAAAAGACAATCAGGATGTAGATTTCATGTTTGTGCTTCCATTTCGAGAGCTGAACTTGATCAGAGATCATCAGTACAGTCTTCACACACTTCTGCTGGACTTTCATCCTGAACTTGAAG
1:58011271-58013068_441	GAGATCATCAGTACAGTCTTCACACACTTCTGCTGGACTTTCATCCTGAACTTGAAGATCTGGAGCCCAAGATTTATGAGGAGTGTAAAGTTGTGTTCATCTTTGATGGTCTGGATGAAA
1:58011271-58013068_504	AGCCCAAGATTTATGAGGAGTGTAAAGTTGTGTTCATCTTTGATGGTCTGGATGAAAGCAGAATCACACTGATGTTTTCAGACGCTCAGAAAGTTTGTGATGTGACTGAGACTTCATCAG
1:58011271-58013068_567	TCACACTGATGTTTTCAGACGCTCAGAAAGTTTGTGATGTGACTGAGACTTCATCAGTGGCTGTGTTGATGTCAAAGCTGATGAAAGGAGAGCTGCTTCCCTCTGCTCTCATCTGGATCA
1:58011271-58013068_630	TGTTGATGTCAAAGCTGATGAAAGGAGAGCTGCTTCCCTCTGCTCTCATCTGGATCACCTCCAGACCAGCAGCAGCCAATCAGATCCCCTCCAAATACATCAAGCGTCTGACAGAAATTC
1:58011271-58013068_693	GACCAGCAGCAGCCAATCAGATCCCCTCCAAATACATCAAGCGTCTGACAGAAATTCAGGGATTCACTGAGCCTCAGAAGGAGGAATATTTCAGGAAGAGAATCAGTGAGCAGCATCAAG
1:58011271-58013068_756	TCACTGAGCCTCAGAAGGAGGAATATTTCAGGAAGAGAATCAGTGAGCAGCATCAAGCCAGCAGAATCATCTCACACATCAGAAGAGCAAGAAGCCTCCACATCATGTGCCACATACCCG
1:58011271-58013068_819	GAATCATCTCACACATCAGAAGAGCAAGAAGCCTCCACATCATGTGCCACATACCCGTCTTCTGCTGGATCTCATCCACTGTGCTTCAGAAGCTCCTGGAAGAAGATCTGAGTGCAGAAA
1:58011271-58013068_882	GCTGGATCTCATCCACTGTGCTTCAGAAGCTCCTGGAAGAAGATCTGAGTGCAGAAATCCCTCAAACTCTGACTGAAATGTACATCCACTTCCTGCTGATTCAGATCAACATGAGGAATC
1:58011271-58013068_945	AAACTCTGACTGAAATGTACATCCACTTCCTGCTGATTCAGATCAACATGAGGAATCAGAAGTATGAAGAGAGAGATCCAGAGAAACTCCTGCAGTCCAACAGAGAAGTGATTGTCAAAC
1:58011271-58013068_1008	ATGAAGAGAGAGATCCAGAGAAACTCCTGCAGTCCAACAGAGAAGTGATTGTCAAACTTGCTGAAGTGGCTTTCAGACAGCTGATGAAGGGCAATGTGATGTTCTATGAGGAGGACCTGG
1:58011271-58013068_1071	AAGTGGCTTTCAGACAGCTGATGAAGGGCAATGTGATGTTCTATGAGGAGGACCTGGTTGAGAGCGGCGTAGACGTCTCTGACGCCTCAGTGTATTCTGGGATTTGCACTGAGATCTTTA
1:58011271-58013068_1134	GCGGCGTAGACGTCTCTGACGCCTCAGTGTATTCTGGGATTTGCACTGAGATCTTTAAGGAGGAATCTGTGATTCAGCAGAGGAAAGTCTACAGCTTCATCCATCTGAGTGTTCAGGAGT
1:58011271-58013068_1197	AATCTGTGATTCAGCAGAGGAAAGTCTACAGCTTCATCCATCTGAGTGTTCAGGAGTTCCTCGCTGCTTTCCATGTGTTTTACTACTTCATAAACAACACCAATGAGGCACTTTTTGATT
1:58011271-58013068_1260	CTGCTTTCCATGTGTTTTACTACTTCATAAACAACACCAATGAGGCACTTTTTGATTCACTCGAAACTCTTCATAACAGAGTAATTAATAAAGCCATTGAGAGTGAGAGTGGTCATCTGG
1:58015908-58016437_0	TGCAGTTGATCTCACACTGGATCCAAACACCGCAAATGCTAAACTCATCCTATCTGAGGAGAACAGAAAGGCAACTCTAGTAGAAGAGCCACAGACATACCCTGCTCATCCAGACAGGTT
1:58015908-58016437_59	AGAACAGAAAGGCAACTCTAGTAGAAGAGCCACAGACATACCCTGCTCATCCAGACAGGTTTGAGCTCTATGAACAGGTTCTGTGTAAAGAGAGTCTGACTGGACGCTGTTACTGGGAGG
1:58015908-58016437_118	TTTGAGCTCTATGAACAGGTTCTGTGTAAAGAGAGTCTGACTGGACGCTGTTACTGGGAGGCTGAATGGAGTGGATGGGTTGATATAGCAGTGACCTATAGAGCAATCAGCAGGAAAGGA
1:58015908-58016437_177	GGCTGAATGGAGTGGATGGGTTGATATAGCAGTGACCTATAGAGCAATCAGCAGGAAAGGAAGAAGTGATGACTGTGATTATGGACTCAATAAGAAGTCCTGGGCTTTAAGCTGTATTAA
1:58015908-58016437_236	GAAGAAGTGATGACTGTGATTATGGACTCAATAAGAAGTCCTGGGCTTTAAGCTGTATTAAGGGCAGATACACTCTCTGGTATGACAAAGTCAGTGTAGAAATTCCGGTACCTTTTTCAA
1:58015908-58016437_295	AAGGGCAGATACACTCTCTGGTATGACAAAGTCAGTGTAGAAATTCCGGTACCTTTTTCAAAATCTACCAGAGTGGGTGTCTATTTGGATTGGCCGGCTGGCTCTCTGTCTTTCTACAGC
1:58015908-58016437_354	AAAATCTACCAGAGTGGGTGTCTATTTGGATTGGCCGGCTGGCTCTCTGTCTTTCTACAGCGTCTCTGACACAAACACACTCACACACTTACACACATTCAACACCACATTCACTGAACC
1:58015908-58016437_409	TACAGCGTCTCTGACACAAACACACTCACACACTTACACACATTCAACACCACATTCACTGAACCCCTCTACTGTGGGATTGGGGTTTTTTATAATAACTGCTCAGTATATCTGTGTTAG
1:58022500-58023020_0	AGATGCGGTTGATCTCACACTGGATCCAAACACAGCAAATGCTAAACTCCTCTTGTTTGACAGGAACAGAAAGATCACGTATGTGGATAATCCTCAGCCCTATCCTGATCATCCAGACAG
1:58022500-58023020_58	GACAGGAACAGAAAGATCACGTATGTGGATAATCCTCAGCCCTATCCTGATCATCCAGACAGATTTGCTGATGTTCCTCAGGTACTGTGTAGAGAGACTCTGACTGGACGCTGTTACTGG
1:58022500-58023020_116	ACAGATTTGCTGATGTTCCTCAGGTACTGTGTAGAGAGACTCTGACTGGACGCTGTTACTGGGAGGTTGAATGGGGCTCCTGGGCTCGTATAGCAGTGGCCTACAGAGGAATCCTTAAAG
1:58022500-58023020_174	CTGGGAGGTTGAATGGGGCTCCTGGGCTCGTATAGCAGTGGCCTACAGAGGAATCCTTAAAGAGCGAGGGACTGTCTCTAAGTTTGGATACAGCGACAAATCCTGGTGTCTCTTCTGCAC
1:58022500-58023020_232	AAAGAGCGAGGGACTGTCTCTAAGTTTGGATACAGCGACAAATCCTGGTGTCTCTTCTGCACTGGTGATGTATTTGTTCCCTGGCACGATAACAAGAGTAACGTCCCAATACATGTAGCA
1:58022500-58023020_290	GCACTGGTGATGTATTTGTTCCCTGGCACGATAACAAGAGTAACGTCCCAATACATGTAGCACAATCTAAAAGAGTCGGAGTGTATGTGGACGTGCCGTCCGGCTCTCTGTCCTTCTACA
1:58022500-58023020_348	AGCACAATCTAAAAGAGTCGGAGTGTATGTGGACGTGCCGTCCGGCTCTCTGTCCTTCTACAGCATTTCTGACAACCACACACCCACACACATACACACATTCAACACCACATTCACTGA
1:58022500-58023020_400	TCCTTCTACAGCATTTCTGACAACCACACACCCACACACATACACACATTCAACACCACATTCACTGAGCCCCTCTATGCTGGATTTAAGGTGTTTCAGTCTTCACTGTCTCTGTGCCAG
10:25858687-25859240_0	CATTTACAGTTTACTGCTGGTTCACAGAGTTTTACTGCTGATCCAAAATAAACCCTAAAGCCAGGATAGACAGGTTGGGTGAACGTAGTGGGGAATATGTAGATGAGTCTCATTTTGTCA
10:25858687-25859240_62	AGGATAGACAGGTTGGGTGAACGTAGTGGGGAATATGTAGATGAGTCTCATTTTGTCAGAGATGCTGAAGAAGGACACAATTCCGGCGCTATAATCCACATACACTCCTAATCTAGAGGA
10:25858687-25859240_124	TGCTGAAGAAGGACACAATTCCGGCGCTATAATCCACATACACTCCTAATCTAGAGGACTTTATTTTTGAAGTGTTTACGCTGATTTTAGTCTTTTTGTTTTTGTCCCATAATGCATATT
10:25858687-25859240_186	ATTTTTGAAGTGTTTACGCTGATTTTAGTCTTTTTGTTTTTGTCCCATAATGCATATTTGGTAGGAGAGCAGTACAAATTTATAGACTGGTCACTACATCCAAATTTGCTGTCATCACCC
10:25858687-25859240_248	AGGAGAGCAGTACAAATTTATAGACTGGTCACTACATCCAAATTTGCTGTCATCACCCCTTCCCTTCCTGCCAATAGTGTTATAGGACAGCGATAAACCTACGCCAGCACTCCCACTCCA
10:25858687-25859240_310	CCTTCCTGCCAATAGTGTTATAGGACAGCGATAAACCTACGCCAGCACTCCCACTCCACTCGACCTCCCAATATGCACGTCCACACACACTCTCTTTACACAAGACCTGAGGCCAGCAAT
10:25858687-25859240_372	ACCTCCCAATATGCACGTCCACACACACTCTCTTTACACAAGACCTGAGGCCAGCAATCAAATCTCTCTGGATGATCAGGATATCGCTGGACTGTGCCATTATTAGTTGCCACTCTGTTC
10:25858687-25859240_433	ATCTCTCTGGATGATCAGGATATCGCTGGACTGTGCCATTATTAGTTGCCACTCTGTTCCCTGCAGACAGCTGGATTATTCCATTCACAGTGTTTGAGTCCATTGAGAGTTGGTGTGAGT
10:26164201-26164730_0	GCCCCAGAATCTGACTCTAGATTTGGACACTGCTCACCCCTCGTTGGCCATCAGTGACTTTGACACCAAGGTTGAGGAGGGCCGTGTTCGTTCCCAAGAACCTGACATGCCCCAGCGATT
10:26164201-26164730_59	TTGACACCAAGGTTGAGGAGGGCCGTGTTCGTTCCCAAGAACCTGACATGCCCCAGCGATTCACTCGTTTTTTCGGAGTGCTCGCGACCGCCCAGTACGCCAACGGTCAGCATTACTGGG
10:26164201-26164730_118	TTCACTCGTTTTTTCGGAGTGCTCGCGACCGCCCAGTACGCCAACGGTCAGCATTACTGGGAGGTGGATGTGCGGGACAAGGGAGTCTGGTATTTGGGCGTCACCACAGAGTACAGCAAC
10:26164201-26164730_177	GGAGGTGGATGTGCGGGACAAGGGAGTCTGGTATTTGGGCGTCACCACAGAGTACAGCAACCGCAAAGGCTTCGTAAACCTTTCGCCCTCTGCTGGCTACTGGAGCCTGTGTCTCCAAGA
10:26164201-26164730_236	ACCGCAAAGGCTTCGTAAACCTTTCGCCCTCTGCTGGCTACTGGAGCCTGTGTCTCCAAGACAGACTGTACGCCAACGAGGAGGACTCGCGCGTGCCTGTAGCGGATTACTGGAACTCTC
10:26164201-26164730_295	GACAGACTGTACGCCAACGAGGAGGACTCGCGCGTGCCTGTAGCGGATTACTGGAACTCTCCTCGAGTCGGCGTCTTCTTGGATTACGACAGAGGCCATGTTACTTTCTTTGACGCAGTC
10:26164201-26164730_354	TCCTCGAGTCGGCGTCTTCTTGGATTACGACAGAGGCCATGTTACTTTCTTTGACGCAGTCACCATGAAACGCATTTATAACTTCGTCACATACTTTGACGAGCCCGTATCACCCTTCTT
10:26164201-26164730_409	GCAGTCACCATGAAACGCATTTATAACTTCGTCACATACTTTGACGAGCCCGTATCACCCTTCTTCAGCCCAGGAAAAAACGACCCAGGCAGCCGACTACAAATATGTCATTTCTACTGA
10:40929947-40930491_0	TCCCTCTGCCATCACGTTTAACTCCAAAACTGCGAATCCTTGGCTGAGCCTGACCTCTTCCCTGACCTGTGTGAGATACCAGACCTTCAACAGCAGCGTGCAGGACAATCCTCAACGCTT
10:40929947-40930491_61	CTGACCTGTGTGAGATACCAGACCTTCAACAGCAGCGTGCAGGACAATCCTCAACGCTTCAACGCGGCGCTGTCCCTCATGGGCGGCCAGGGCTTCACTAAAGGCCGGCATTACTGGGAG
10:40929947-40930491_122	ACGCGGCGCTGTCCCTCATGGGCGGCCAGGGCTTCACTAAAGGCCGGCATTACTGGGAGGTGGAGGTTTACAGCAGCACTGTCTGGACCGTCGGCGTCGCTCGTGAATCCGTCACCAGGA
10:40929947-40930491_183	GGAGGTTTACAGCAGCACTGTCTGGACCGTCGGCGTCGCTCGTGAATCCGTCACCAGGAAAGGTGTCATCAACACCATGCCTGCAAACGGCTTCTGGACGCTCTCTCTGTCGTATGGAGT
10:40929947-40930491_244	GGTGTCATCAACACCATGCCTGCAAACGGCTTCTGGACGCTCTCTCTGTCGTATGGAGTTCAGTATATGGCTGGGACGTCTCCACCAACGCTGCTGTCCCTGGAGGAGCCGCTGGCCAGG
10:40929947-40930491_305	AGTATATGGCTGGGACGTCTCCACCAACGCTGCTGTCCCTGGAGGAGCCGCTGGCCAGGATTGGGGTCTATCTGGACTATAAGAGGGGCCTGGTGTCGTTTTATAACGCAGAGAGCATGA
10:40929947-40930491_366	TGGGGTCTATCTGGACTATAAGAGGGGCCTGGTGTCGTTTTATAACGCAGAGAGCATGACGCACCTCTATACCTTCAGGGACACCTTCACCGAGACCCTCTTTCCATACTTTAACCTGGG
10:40929947-40930491_424	ACGCACCTCTATACCTTCAGGGACACCTTCACCGAGACCCTCTTTCCATACTTTAACCTGGGCTTCCTGGATAAAGTGCACGAAAATGAGCCTCTTAAAGTGTTCATGCCCAAAATCTGA
10:43992408-43993375_0	CTGTTGTTGATACATGCGTTTTTAAAGTCCAGACTGACCATCGGATGCCCTCTTTTGGATTCTGGAAGGTCGCATAAGACATCGGTTGCTAGCCGAGGAAGGATCGTGTCACTTTTTTCC
10:43992408-43993375_66	AGGTCGCATAAGACATCGGTTGCTAGCCGAGGAAGGATCGTGTCACTTTTTTCCAACCAGAGAATGAAGTCTAAAAGGTTGCACGTGCAGTGGATGGGATTTCTCTGCAGATCGAGTATT
10:43992408-43993375_132	AAGTCTAAAAGGTTGCACGTGCAGTGGATGGGATTTCTCTGCAGATCGAGTATTTGCAGCTGGTGATTGCTGCCAGTTGTGAAGGACGATGCGCCGAGATGCTTCAGCTTGTTGTTGGCA
10:43992408-43993375_198	TTGCTGCCAGTTGTGAAGGACGATGCGCCGAGATGCTTCAGCTTGTTGTTGGCAAAGTTGAGGATCTGAAGGCTTTTGACATTTTCGAGAAAGCTGTACCTTAACTTTGAGATCTGATTA
10:43992408-43993375_264	TGAAGGCTTTTGACATTTTCGAGAAAGCTGTACCTTAACTTTGAGATCTGATTATGGCTCAAGTCTAAGACCTTCAGTGAACGTGTATGCTTTGATAGTTTCCTAGGGACTACCCTCAGT
10:43992408-43993375_330	AAGACCTTCAGTGAACGTGTATGCTTTGATAGTTTCCTAGGGACTACCCTCAGTTTGTTTTTACTCAGATCCAGAGTTTCCAGCTGGGGTAAACTTTGGAGCTGTTCCCACGCAAAATCA
10:43992408-43993375_396	AGATCCAGAGTTTCCAGCTGGGGTAAACTTTGGAGCTGTTCCCACGCAAAATCAGTGAGCGTGTTCCTGCTCATGCTAATATATCTTAGCGTCTTTGGAAAGTAGTCGAAGATGTCGTCT
10:43992408-43993375_462	CTGCTCATGCTAATATATCTTAGCGTCTTTGGAAAGTAGTCGAAGATGTCGTCTGGTATCTCACTAAGCTTGTTATACGATATATCAAGGTATGTAAGATTTGAAAGGGATTTAAAGAGA
10:43992408-43993375_528	AGCTTGTTATACGATATATCAAGGTATGTAAGATTTGAAAGGGATTTAAAGAGACTTTGGTATCCGCGTTGCTTCTTCCACATGATGTCCAATCGATTGCCTTGAAACTGCAGTTCGTTG
10:43992408-43993375_594	CGTTGCTTCTTCCACATGATGTCCAATCGATTGCCTTGAAACTGCAGTTCGTTGAGCGAGTCGCTTTGCAGGGTTTTATTGGTCAGCATGTTGATCTCGTTCCAACTCAGATTGAGTACT
10:43992408-43993375_660	TGCAGGGTTTTATTGGTCAGCATGTTGATCTCGTTCCAACTCAGATTGAGTACTTTGAGAAACTGAAGGTTTTCTAGAAATGTAAGACAGTTTCTGACACCCGCCACTTCAAAATAATGT
10:43992408-43993375_726	AGGTTTTCTAGAAATGTAAGACAGTTTCTGACACCCGCCACTTCAAAATAATGTTGATTGTGACTCAGATCCAGAACTTCTAATGCCTTCAGTTCACTCAAAGCCGAATCTGAATGCATG
10:43992408-43993375_792	AGATCCAGAACTTCTAATGCCTTCAGTTCACTCAAAGCCGAATCTGAATGCATGTAGATTCTGTTGTGAGATAGGTCAAGGTACTTGAGTTTGGGAAAGTGGGCGAACTCTGTGCCGTTG
10:43992408-43993375_847	AGATTCTGTTGTGAGATAGGTCAAGGTACTTGAGTTTGGGAAAGTGGGCGAACTCTGTGCCGTTGAAGTAGGAAACTATGAAATTGGAGGAAAGATTGAGGCAAGTGATGTTCTCCGCTC
10:43996303-43997740_0	TGTGAATAAAGGTGGATTGACGTGGTAAATGTTGTTCCTGCTGAGATCCAAAACTGGTCCAGTTGCAAGACACTCGGCTTTGGTGAATGGAGGATAATGGCGGAACTCTTCATTTGTGTG
10:43996303-43997740_63	TGCAAGACACTCGGCTTTGGTGAATGGAGGATAATGGCGGAACTCTTCATTTGTGTGAATGTAAGGTCCTTCGCGGTGGTCTCCCTGATTATCATCCTTAAAACCACTTTTACTTTGACC
10:43996303-43997740_126	AGGTCCTTCGCGGTGGTCTCCCTGATTATCATCCTTAAAACCACTTTTACTTTGACCCTCCCATCTTCGGATAGGACTTGAGAAAGTTAGCCTGTTGTCAATCAACGAAATTAAAGACAA
10:43996303-43997740_189	TCTTCGGATAGGACTTGAGAAAGTTAGCCTGTTGTCAATCAACGAAATTAAAGACAAGTTGTGAAAGTTCCTGAACACCGATAAGTTGACCTGCTGGAGAAAGTTGACGGCCAGATTTAA
10:43996303-43997740_252	AAAGTTCCTGAACACCGATAAGTTGACCTGCTGGAGAAAGTTGACGGCCAGATTTAAAACGGAGAGATTTCGTAAACTAAATAAAGGTCGGAGGTCGTCTTCGGAGAGCTTGTGGAAAAT
10:43996303-43997740_315	GAGATTTCGTAAACTAAATAAAGGTCGGAGGTCGTCTTCGGAGAGCTTGTGGAAAATATAGCCTTCCAGGTGAAGCGTTTGGAGGGATTCCAATCTGGAGAAACCTTCAGAGAGTTTTAG
10:43996303-43997740_378	TTCCAGGTGAAGCGTTTGGAGGGATTCCAATCTGGAGAAACCTTCAGAGAGTTTTAGTCTCGGGTAAATCCTTTCCGATGGGTTATTGTAGGAGATATCGACAACCTCCACTTGCGGTAG
10:43996303-43997740_441	GTAAATCCTTTCCGATGGGTTATTGTAGGAGATATCGACAACCTCCACTTGCGGTAGGACGCTAAAAAATTGTCCGCTTTCAAATTCGCTTATTAGCGAGTTAAAGGAAAGATATAAGTA
10:43996303-43997740_504	AAAAAATTGTCCGCTTTCAAATTCGCTTATTAGCGAGTTAAAGGAAAGATATAAGTACTTTAAGTTGGTCAGGTTTTGGAACCACATAGAGTTGATGCTTTGTAAAGAATTTCCGGATAG
10:43996303-43997740_567	GTTGGTCAGGTTTTGGAACCACATAGAGTTGATGCTTTGTAAAGAATTTCCGGATAGTCGTAGGTCTTGCAGTTGGGATAGTTTGCTGAATGCATTCGGATGAATCTGTAGAGCGTTATT
10:43996303-43997740_630	GTCTTGCAGTTGGGATAGTTTGCTGAATGCATTCGGATGAATCTGTAGAGCGTTATTGTTTGTCTGACAGCTTGTGCATGGGAAAGGAGTGGTAAAACAAATAGGACAGTTTCCAGATAA
10:43996303-43997740_693	CTGACAGCTTGTGCATGGGAAAGGAGTGGTAAAACAAATAGGACAGTTTCCAGATAAATCAAGAACTTTTAGACGTGTTAGATGGTTTAGATCAGATTCATGAACATGATCAATCCTGTT
10:43996303-43997740_756	AACTTTTAGACGTGTTAGATGGTTTAGATCAGATTCATGAACATGATCAATCCTGTTTAGCAGAAGAGAGAGATTGTGAAGGGTTCTGGGTAAAGCAAACGGCACATTATGCAGTCCATT
10:43996303-43997740_819	AAGAGAGAGATTGTGAAGGGTTCTGGGTAAAGCAAACGGCACATTATGCAGTCCATTTTTGGACAGTTGTAGCTCAGTCAGTTGTAAATGTTGAAACGTCTCATTCTGAATGGTTAATTC
10:43996303-43997740_882	CAGTTGTAGCTCAGTCAGTTGTAAATGTTGAAACGTCTCATTCTGAATGGTTAATTCTGCACTGATGTTATGATAGCAGTTCTTGTTTAGTTTTAAAACCGTGAGTTTAGTCATTCCTTT
10:43996303-43997740_945	GATGTTATGATAGCAGTTCTTGTTTAGTTTTAAAACCGTGAGTTTAGTCATTCCTTTAAAGTCTGACTGTTCAATTGATTTGATGTGGTTGGAATTGAGGCTCAGCCATTGCAGACCTGC
10:43996303-43997740_1008	TGACTGTTCAATTGATTTGATGTGGTTGGAATTGAGGCTCAGCCATTGCAGACCTGCAGGGAGATTTTTGGGTAAAACCGAAATCTTATTATTGTCGAGGAGCAGAGTCTTCAGGTTGGT
10:43996303-43997740_1071	ATTTTTGGGTAAAACCGAAATCTTATTATTGTCGAGGAGCAGAGTCTTCAGGTTGGTCAGTCTTGAGAAAACCCCATTGTCCTTTTCGTGGCATTTTTCAATCTGATTTCTTCTTAGGTC
10:43996303-43997740_1134	TGAGAAAACCCCATTGTCCTTTTCGTGGCATTTTTCAATCTGATTTCTTCTTAGGTCTATCCATGTGACGTTGTTTAAGTTCCAGAAGGCGTCCTTTGAGATGTTATGTATTTTGTTGTT
10:43996303-43997740_1197	TGTGACGTTGTTTAAGTTCCAGAAGGCGTCCTTTGAGATGTTATGTATTTTGTTGTTTGCTAAGTTTAGATTAGTTGTGTTCCAGATCAGGTTTTTGGGGATTTTCTTTAAATATCTTTC
10:43996303-43997740_1260	GTTTAGATTAGTTGTGTTCCAGATCAGGTTTTTGGGGATTTTCTTTAAATATCTTTCTGAGCAGTCCAAGGTGACGGATGTGTTGGAGAGATTCACATCGCAGGGGAGTTTTCTCCAAGC
10:43996303-43997740_1317	TGAGCAGTCCAAGGTGACGGATGTGTTGGAGAGATTCACATCGCAGGGGAGTTTTCTCCAAGCCCAGTTGTAGCCTTCAGATGAGTGGACCGTACATAGCAAAAAGAACGCAACAATCAT
10:45109897-45110394_0	GGTTTGCCTCAATAATAATAAAAAAACCTGTTTGACATGACGATATCCTGAGCCGTCAGACATCCGCTGTTGTAAACCACGTCTACTTCCTCATCAAGGAATTTCCCGCTTCAACAGGAT
10:45109897-45110394_63	CCGCTGTTGTAAACCACGTCTACTTCCTCATCAAGGAATTTCCCGCTTCAACAGGATCATATAAAACACGAGCACGCTTTCACAGCCAGTCATTCAACACACACTTTCACATGAGAAAGC
10:45109897-45110394_126	AAACACGAGCACGCTTTCACAGCCAGTCATTCAACACACACTTTCACATGAGAAAGCAGAGGAACTTAACCAGCTCTGGTATGTGGAGTGCAGATTACATGCATTTTACTATTATTATTA
10:45109897-45110394_189	ACTTAACCAGCTCTGGTATGTGGAGTGCAGATTACATGCATTTTACTATTATTATTATTATCAGTTATATTCATCATTATTATTATTTAGTCATTTCTGCTTCATTTTTATAGAAATGAT
10:45109897-45110394_252	GTTATATTCATCATTATTATTATTTAGTCATTTCTGCTTCATTTTTATAGAAATGATGGCATGCGGGCAATATGAAGTCACCATAGCTCCAAAAAAGTGAGTATTAATGCCGTTTTATAT
10:45109897-45110394_315	CGGGCAATATGAAGTCACCATAGCTCCAAAAAAGTGAGTATTAATGCCGTTTTATATATATATATAATTCATAATATTTGCATATTTGGTCTAAAAAGCTGATATTTTGCAGTTTGTGGG
10:45109897-45110394_377	TATAATTCATAATATTTGCATATTTGGTCTAAAAAGCTGATATTTTGCAGTTTGTGGGAGACAGACAGTGCTGTTTATTCAGATTCTGATGAGATGGACTGTTCAGATCCGCTTGCAATG
10:45111870-45112120_0	TATATATATATAAACATGTCTAACGCTGTCATTTCCCTGCAGAGCTACAGATGCGACATGCATGAGGGCATCAGGCTGGAGATGTGGACTTCGCAGCACAAAATGAAGCAGTTGGTGAAC
10:45111870-45112120_65	GGGCATCAGGCTGGAGATGTGGACTTCGCAGCACAAAATGAAGCAGTTGGTGAACGTCATCATCGCCCTGAACAGAATGAAGCACATCAAACCCCAATCCACAGAGTTTGGAGAAAAAGA
10:45111870-45112120_130	CCCTGAACAGAATGAAGCACATCAAACCCCAATCCACAGAGTTTGGAGAAAAAGAGGTGCTGGACATGCTCATGGCGAACGTCATCCAAGGTACCTACTACCAGGACTGCACTATACACT
10:45113496-45113983_0	GCGTGAAGTGAACGTGGTGGATTCAGTGCCGTCTTACAATAAAACCAAAAACGTCTTGCAATGCACGATTTGCGATCAGTATAAGAAGTCTCTGGTGCTCAGTGGCGGATCTCCACATTT
10:45113496-45113983_62	GCACGATTTGCGATCAGTATAAGAAGTCTCTGGTGCTCAGTGGCGGATCTCCACATTTGCAGGCCGTCACACTGAGAGCCGGAAGCAGCGACTTGAAAGGTAAGCATCAGCATTTACACA
10:45113496-45113983_124	GCCGTCACACTGAGAGCCGGAAGCAGCGACTTGAAAGGTAAGCATCAGCATTTACACACCTGTGGGTTTATTTTACTGTAGAATTTAATTCAATTCAATATTTAAAACAAAAAGCATGAT
10:45113496-45113983_186	TGGGTTTATTTTACTGTAGAATTTAATTCAATTCAATATTTAAAACAAAAAGCATGATGTACATCACACTAGAGGCGTGTGGTAGAGTGTGACCAACACATGACTCTCCTTCAGAAATCT
10:45113496-45113983_248	ATCACACTAGAGGCGTGTGGTAGAGTGTGACCAACACATGACTCTCCTTCAGAAATCTCAGCTTTTCTCCTGAATTTCCCCTGTTTTCACTTCCTCCAGTGCGCTTCAGCATGTCCACGT
10:45113496-45113983_310	TTTTCTCCTGAATTTCCCCTGTTTTCACTTCCTCCAGTGCGCTTCAGCATGTCCACGTATGCGTCGCCCAGTGCTCCGGCTACTTCTGCTCAGCCTGTGTGTTTGGGAATCTCCAAAAGT
10:45113496-45113983_367	TATGCGTCGCCCAGTGCTCCGGCTACTTCTGCTCAGCCTGTGTGTTTGGGAATCTCCAAAAGTAACCTGTACCTGGCCTGCAGCCCCGCCGAAGGCTCCGCTCCACATCTCGTACTCAAG
10:45116101-45117159_0	AGATCAGCGGGTCTCTGGAGACCATTAAAGCTGGAGATCCAAACGGATACGACCAGCTGCTGTTCTTCAGGAAGGAGACCGGCAGCTCCATAAACACCTTCGAGTCCGTCAAATGTCCCG
10:45116101-45117159_63	TCTTCAGGAAGGAGACCGGCAGCTCCATAAACACCTTCGAGTCCGTCAAATGTCCCGGTTGGTTTATCAGCACCGCGTATGAAGATTCGCAGATGGTGGAGATGGACAGGAAAGACACCG
10:45116101-45117159_126	TTATCAGCACCGCGTATGAAGATTCGCAGATGGTGGAGATGGACAGGAAAGACACCGAGCGCATCATTAACTTCGAGCTGCAGGATAAAGTGCGCATCTAGAGTCTCAAAACTGCTGTGC
10:45116101-45117159_189	TCATTAACTTCGAGCTGCAGGATAAAGTGCGCATCTAGAGTCTCAAAACTGCTGTGCTTCCATCCAAAGACGAGAACTACAATCAGCACAACAACAATTCAGATCTGCAGCAATGGAGAG
10:45116101-45117159_315	ACCAACACTACTGACGCAAACACCCTCACACACACACATTTATATCTGATCAGCAGCTATCAGAAACTAAATCACAGCACACACACTGATGCACATCTTGGCGTTACAATTAAGCATTTT
10:45116101-45117159_378	AAACTAAATCACAGCACACACACTGATGCACATCTTGGCGTTACAATTAAGCATTTTTTTAATGCAATAATCCAAGATGTGCATATAAATAGATGGAAGCACGGCTATTCAGAGATGGTT
10:45116101-45117159_441	GCAATAATCCAAGATGTGCATATAAATAGATGGAAGCACGGCTATTCAGAGATGGTTATTAATTATGATTTAAAGAGAGAGTATGTACCATGTACAGCTTACAGGATGATGAGTTCAGCT
10:45116101-45117159_504	TATGATTTAAAGAGAGAGTATGTACCATGTACAGCTTACAGGATGATGAGTTCAGCTCAAGACTGAATTATTTGCAAATATTCCCCAAGTGCTGCTTATTCTTGGATGCATTTTGAGCAA
10:45116101-45117159_567	TGAATTATTTGCAAATATTCCCCAAGTGCTGCTTATTCTTGGATGCATTTTGAGCAATATTAGAGTTAATAACTCGTTTATTTTTGTCTTTGTCGTAATATTTTACTAATTATTTTATTA
10:45116101-45117159_630	AGTTAATAACTCGTTTATTTTTGTCTTTGTCGTAATATTTTACTAATTATTTTATTACGTTTATTTATTAAGGGGTTATTATTGACCACAGCGGTTTTAACTTATGAATATATTTAATTT
10:45116101-45117159_693	TTTATTAAGGGGTTATTATTGACCACAGCGGTTTTAACTTATGAATATATTTAATTTTTATTATTTTAATTGTTTGATCTGAAGGAAATATTCATTTCTCCTGTGTGAAAATATACTGAC
10:45116101-45117159_756	TTTTAATTGTTTGATCTGAAGGAAATATTCATTTCTCCTGTGTGAAAATATACTGACAACTGTTAAACAGCGCTTGGGAAATATGTTAATTTTAATATATTTTCAGCTGTAAGGGTCTGT
10:45116101-45117159_819	TAAACAGCGCTTGGGAAATATGTTAATTTTAATATATTTTCAGCTGTAAGGGTCTGTCAGATCCTGCATTTATTTTTATTTTTATACTATTTTTGGTAATGGTAAATTCACATTGAATAC
10:45116101-45117159_882	CTGCATTTATTTTTATTTTTATACTATTTTTGGTAATGGTAAATTCACATTGAATACGTCAGGTATGCTTCTCTGTTTTGTACTTATATTTAATATTTATTTCAATCATGTTTTAAATCA
10:45116101-45117159_938	CGTCAGGTATGCTTCTCTGTTTTGTACTTATATTTAATATTTATTTCAATCATGTTTTAAATCAGTTGTATTGTTTTCTGCAGTGATTTCTTTGTTATTTAATAAATATTTAACTATATA
11:7212559-7213825_0	TTTAGAATATGAGATGGAGCATGGCTTTCTCAGGACTCAAAGGGATGCATCGGCTGTGCTGTTTTTCCGCGAACTGCCTCGACTTAGTAAAAGAGACTGCAAGAAAAACTTTGCAAAGTT
11:7212559-7213825_64	TTCCGCGAACTGCCTCGACTTAGTAAAAGAGACTGCAAGAAAAACTTTGCAAAGTTTCTGCTGGACGTCACAGCCGACGGCTTGCTGGACACACAAGCCCGGGAGCTCTTGACTGACCTG
11:7212559-7213825_128	ACGTCACAGCCGACGGCTTGCTGGACACACAAGCCCGGGAGCTCTTGACTGACCTGAAGCAACGCATCTGCAACACCGGTCGCCTCCAACCACTCTGTATGGAGCTCAGCAAAGGAGCCA
11:7212559-7213825_192	CATCTGCAACACCGGTCGCCTCCAACCACTCTGTATGGAGCTCAGCAAAGGAGCCATGGACCCAAGCCGCAAAGAACACAAGGAATACCTGGGTAAGCTGTGTGAACAGGTAACATCTCA
11:7212559-7213825_256	AGCCGCAAAGAACACAAGGAATACCTGGGTAAGCTGTGTGAACAGGTAACATCTCAATTGAAGGAACTGATCAGCAGAAATGCTCTGCAAACCTCAGGAACTTCAGTAGATCCAGTATGG
11:7212559-7213825_320	AACTGATCAGCAGAAATGCTCTGCAAACCTCAGGAACTTCAGTAGATCCAGTATGGTCCTGGCTAAAACAGGAGATCTTTCATCATGCCAAGTTGAGTGAGGAGAAGTGTGCTGTGTTTA
11:7212559-7213825_384	AAAACAGGAGATCTTTCATCATGCCAAGTTGAGTGAGGAGAAGTGTGCTGTGTTTAAAGGGAGAGACGACATTCTGGGAAAGATCTCCATCACCCTGTGGGAATCCAATGATGTTTCTCA
11:7212559-7213825_448	GACGACATTCTGGGAAAGATCTCCATCACCCTGTGGGAATCCAATGATGTTTCTCATGGACCTCTTCTAGTCCATGGACCTCCAGGAGTTGGTAAAACAGCTCTGCTTTGCAAACTGGCC
11:7212559-7213825_512	TTCTAGTCCATGGACCTCCAGGAGTTGGTAAAACAGCTCTGCTTTGCAAACTGGCCAAGGAAATGCGAGCAGTTGTTGACAATCGGGGAGTTGTTCTGCTGAGGTTGCTGGGAACATCTC
11:7212559-7213825_576	GCGAGCAGTTGTTGACAATCGGGGAGTTGTTCTGCTGAGGTTGCTGGGAACATCTCTGCTCAGTTCAGATGTCGATTCTGTTCTTCGAGGTGTTTGTCTTCAAGTGTGTGGAGCTCTAGG
11:7212559-7213825_640	TCAGATGTCGATTCTGTTCTTCGAGGTGTTTGTCTTCAAGTGTGTGGAGCTCTAGGGTTGCAGTCCCCATACTCGCATATAGCGTACACGCATGAAGGGCTAGTTCGATTTTTCCATTCC
11:7212559-7213825_704	CCCCATACTCGCATATAGCGTACACGCATGAAGGGCTAGTTCGATTTTTCCATTCCATGCTGGAAGACGTGTCAAAACAAGGAGACACTCTTCTACTCATTCTAGACTCATTGGAGCAGC
11:7212559-7213825_768	AGACGTGTCAAAACAAGGAGACACTCTTCTACTCATTCTAGACTCATTGGAGCAGCTTTTAGAGACAAACAAACTTCATAAACTAGACTGGATACCTAAAATAATTCCACCCAATGTGCA
11:7212559-7213825_832	ACAAACAAACTTCATAAACTAGACTGGATACCTAAAATAATTCCACCCAATGTGCAAATCGTATTCTCAACTTCTAATGAGTGCTTGGACAAATGTAAATCTTTGGTTTCAGCGGAAGAA
11:7212559-7213825_896	TCTCAACTTCTAATGAGTGCTTGGACAAATGTAAATCTTTGGTTTCAGCGGAAGAAAACATCTTTAAATTGGAACTTCTCACGAAAGATCAAGGGAGAGACGTCATTGATGCATATATGA
11:7212559-7213825_960	TAAATTGGAACTTCTCACGAAAGATCAAGGGAGAGACGTCATTGATGCATATATGAGTGCAGCTGAACGCAAGCTGACGGCAGAACAGCAAGACGCAATCTTACGCTACTTTGAGCAAAG
11:7212559-7213825_1024	GAACGCAAGCTGACGGCAGAACAGCAAGACGCAATCTTACGCTACTTTGAGCAAAGTGGAAACCCTTTGCATCTGAAACTCATGCTAGACACTGCCAAACTGTGGTCCTCCTACACCCCC
11:7212559-7213825_1088	CTTTGCATCTGAAACTCATGCTAGACACTGCCAAACTGTGGTCCTCCTACACCCCCATGTCTAGTGTTCACCTGGACAAGTCGGCGGAGGAAGTGATGACACAGTTTGTCGAGTCACTTG
11:7212559-7213825_1146	GTCTAGTGTTCACCTGGACAAGTCGGCGGAGGAAGTGATGACACAGTTTGTCGAGTCACTTGAGGTGAATCATGGGAAGAAGCTAGTCAGTCATGCTCTGAGCTTCATCCTGTTATCAAG
11:39963781-39964331_0	TATAAACGCACTGTGTTTATTCGCAAGGGCTGCACGTTTTTGCCGTTGGCGTGACTTTGACCGGGGCTGAAGTATGGGAAGAGTTTGGCTGGAAACTTCTCTCTGTACGTGTACAGCCAG
11:39963781-39964331_62	GGGGCTGAAGTATGGGAAGAGTTTGGCTGGAAACTTCTCTCTGTACGTGTACAGCCAGGACATGTCGTCAGCGTTGTAGAAAACCAGCAAGCCTTTAGGATAGTCTAAGTAGACGCCCAC
11:39963781-39964331_124	TGTCGTCAGCGTTGTAGAAAACCAGCAAGCCTTTAGGATAGTCTAAGTAGACGCCCACTTTTTCCAGTTTGCTCTTGACGTTGAGGCGCGTCCAGGGCTCTGTGCATGCGCTGTATTGAT
11:39963781-39964331_186	TCCAGTTTGCTCTTGACGTTGAGGCGCGTCCAGGGCTCTGTGCATGCGCTGTATTGATTACCGTCATGCATCACGATGCAGTAGAAGCCTCGGCTGGGCTGAATTTGAATGCTGCCCTTG
11:39963781-39964331_248	GTCATGCATCACGATGCAGTAGAAGCCTCGGCTGGGCTGAATTTGAATGCTGCCCTTGCGGTTGACCGTTTCGTTGGCCACACCAATCATCCACTGGGTTTTTTCGGACACCATTACCTC
11:39963781-39964331_310	TGACCGTTTCGTTGGCCACACCAATCATCCACTGGGTTTTTTCGGACACCATTACCTCCCAGTAGTGGACGCCTCCGGAGAAGCCTTCATCGCCCAGAACGGACACCTCCACGTCGAATC
11:39963781-39964331_372	TAGTGGACGCCTCCGGAGAAGCCTTCATCGCCCAGAACGGACACCTCCACGTCGAATCGGCGCGGTGAATCCTGCAAGGGCTGTGGGTGCAGGTTGCCATACGCCACGATGGTGCAGTCG
11:39963781-39964331_430	GGCGCGGTGAATCCTGCAAGGGCTGTGGGTGCAGGTTGCCATACGCCACGATGGTGCAGTCGTCTGATAAGATGAGCCGCTGGTGAGCAGTGCTGGGGTCCATGGTTAATGCAGCAGGCA
11:40067818-40068368_0	TATAAACGCACTGTGTTTATTCGCAAGGGCTGCACGTTTTTGCCGTTGGCGTGACTTTGACCGGGGCTGAAGTATGGGAAGAGTTTGGCTGGAAACTTCTCTCTGTACGTGTACAGCCAG
11:40067818-40068368_62	GGGGCTGAAGTATGGGAAGAGTTTGGCTGGAAACTTCTCTCTGTACGTGTACAGCCAGGACATGTCGTCAGCGTTGTAGAAAACCAGCAAGCCTTTAGGATAGTCTAAGTAGACGCCCAC
11:40067818-40068368_124	TGTCGTCAGCGTTGTAGAAAACCAGCAAGCCTTTAGGATAGTCTAAGTAGACGCCCACTTTTTCCAGTTTGCTCTTGACGTTGAGGCGCGTCCAGGGCTCTGTGCATGCGCTGTATTGAT
11:40067818-40068368_186	TCCAGTTTGCTCTTGACGTTGAGGCGCGTCCAGGGCTCTGTGCATGCGCTGTATTGATTACCGTCATGCATCACGATGCAGTAGAAGCCTCGGCCGGGCTGGATTTGAATGCTGCCCTTG
11:40067818-40068368_248	GTCATGCATCACGATGCAGTAGAAGCCTCGGCCGGGCTGGATTTGAATGCTGCCCTTGCGGTTGACCGTTTCGTTGGCCACACCAATCATCCACTGGGTTTTTTCGGACACCATTACCTC
11:40067818-40068368_310	TGACCGTTTCGTTGGCCACACCAATCATCCACTGGGTTTTTTCGGACACCATTACCTCCCAGTAGTGGACACCTCCGGAGAAGCCTTCATCGCCCAGAACGGACACCTCTACGTCGAATC
11:40067818-40068368_372	TAGTGGACACCTCCGGAGAAGCCTTCATCGCCCAGAACGGACACCTCTACGTCGAATCGGCGCGGTGAATCCTGCAAGGGCTGCGGGTGCAGGTTGCCATACGCCACGATGGTGCAGTCG
11:40067818-40068368_430	GGCGCGGTGAATCCTGCAAGGGCTGCGGGTGCAGGTTGCCATACGCCACGATGGTGCAGTCGTCTGATAAGATGAGCCGCTGGTGAGCAGTGCTGGGGTCCATGGTTAATGCAGCAGGCA
11:40240899-40241622_0	GGTGATTTATGGTTTATTTGAGATATCTTTTAATAAAAAAGACAAGAACATCAAGGATCAAAAGTGTTTTTGTTTTAAACATGAAGTGTAGGAACTTTAGGTACATCAAGTGATCCCCTT
11:40240899-40241622_61	AAGTGTTTTTGTTTTAAACATGAAGTGTAGGAACTTTAGGTACATCAAGTGATCCCCTTTTACATTTTAGTAAGAAAATGCTAAAGCACTTCATAATGTGCATAGATACATGAGCACATG
11:40240899-40241622_122	ACATTTTAGTAAGAAAATGCTAAAGCACTTCATAATGTGCATAGATACATGAGCACATGCATATAGTGGATGTGAAGTGAATAATGCAACAAAATAATATGCATTTAAATGTGGACATGA
11:40240899-40241622_183	TATAGTGGATGTGAAGTGAATAATGCAACAAAATAATATGCATTTAAATGTGGACATGACTGATTTGAACTCATTTGTATGCAGTGAGATTGTAAGCTACACGTGATGTTTAATTGCTTA
11:40240899-40241622_244	GATTTGAACTCATTTGTATGCAGTGAGATTGTAAGCTACACGTGATGTTTAATTGCTTAATGCATATTAAAAGAAATTTAAAAAAAACTAATCATCACAATTTATGTTCCTCCTAATTTA
11:40240899-40241622_305	GCATATTAAAAGAAATTTAAAAAAAACTAATCATCACAATTTATGTTCCTCCTAATTTATTTCTAGGAAAATAATTATAGAATTAGATTTCACGTAAAAACAAAACAATCCATCCCCAAC
11:40240899-40241622_366	TCTAGGAAAATAATTATAGAATTAGATTTCACGTAAAAACAAAACAATCCATCCCCAACGTCTCAGAAGTCAGCATGCGTATGATTCATACACACACTGATTAATGCCTGTTTATTGTCA
11:40240899-40241622_427	CTCAGAAGTCAGCATGCGTATGATTCATACACACACTGATTAATGCCTGTTTATTGTCATAGATACAAAACAACAATCATTCATAACACAATAACTCATTTCAGTAAACCAAAATAATCA
11:40240899-40241622_488	GATACAAAACAACAATCATTCATAACACAATAACTCATTTCAGTAAACCAAAATAATCATGTGTTGCTCCATATGAAACATAACTTCTGCAATAACATCAGCAAAGAGCATTAGTGAGGC
11:40240899-40241622_549	TGTTGCTCCATATGAAACATAACTTCTGCAATAACATCAGCAAAGAGCATTAGTGAGGCTGTGCGGTTCAGATGTCTTTGGTTCTGAATGCTGAAAGTTATACCGGGGTAAACGAGACAC
11:40240899-40241622_603	GAGGCTGTGCGGTTCAGATGTCTTTGGTTCTGAATGCTGAAAGTTATACCGGGGTAAACGAGACACATTTTGATACTGGTCCGAAAGCTGGCCTTTTGTTCCACTGGGCAAGTAAGAATC
11:40243551-40243800_0	AATAAAAACAATTTTGTAAATTTTATTTGATGCAGACATCAAAATGGGACCAATATTTGACACAAATAACTGTCATGTAAATCTGCTATATAGTCTCACCGGTTTATTGTGAAAACAGGA
11:40243551-40243800_65	ATAACTGTCATGTAAATCTGCTATATAGTCTCACCGGTTTATTGTGAAAACAGGATGATGTTGAATCTCCTGTGGCTGCAGGTTTTGTCATGGAGCTCCGCAGGTCCAGACTGATCATCT
11:40243551-40243800_129	ATCTCCTGTGGCTGCAGGTTTTGTCATGGAGCTCCGCAGGTCCAGACTGATCATCTGAGAGCCCGAGGTCAGCATAGGATTGGACCAGCCGGACAAACAGTGCTAAAAACAAATCATATT
11:40245480-40245720_0	GTCAATGGTGATAATCTCAAAAGCGAAATATGATCTGTATAATAGTTCTGGTCAATTTAGGTGATTTTGATAATTGTTAATTCCAGTTTCCCAATATGAAACTCACAGAAGGTAAACCCA
11:40245480-40245720_60	GTGATTTTGATAATTGTTAATTCCAGTTTCCCAATATGAAACTCACAGAAGGTAAACCCAGGCTGTCAGACGGATCAAAACTGCTGCGGCGATGGGCTTTGTATTTGTGCGCTGGCAGCA
11:40245480-40245720_120	GGCTGTCAGACGGATCAAAACTGCTGCGGCGATGGGCTTTGTATTTGTGCGCTGGCAGCAGGGTCGAGCGAGGTATACTGACTCTAAATAAAACAGAGAGAGTCAGAAAATGAATCAATG
11:40247491-40247807_0	TGATTAAAGCAGGCTCTGTTTCAGTATGAGGGTGTTCAGATTTGGGCTTCTTGCACACTGGACAGGCGGCCTGTGCATCCAGCGGAACCGCAAACAATCGACTGTTTACTCTGTAGCAGA
11:40247491-40247807_66	CGGCCTGTGCATCCAGCGGAACCGCAAACAATCGACTGTTTACTCTGTAGCAGAAAGTGCCTGACAAGCAAAACCCAAATTTCAAATCAACACTTCAATTTCTGGTAGCTTCGTGACATT
11:40247491-40247807_132	AGCAAAACCCAAATTTCAAATCAACACTTCAATTTCTGGTAGCTTCGTGACATTAAAAACCAGCGCTAAAGCGATTCAGCACAAACACAAATCAGCAGATCTCTTACACTGATGCGAATC
11:40247491-40247807_196	GCTAAAGCGATTCAGCACAAACACAAATCAGCAGATCTCTTACACTGATGCGAATCTGCAGGCGGACGCACCTCTTCACTATCAAGAGTTGAAGACGCAAGGTCAGCAACAGATGGAAGT
11:40250822-40251117_0	CTGATAATAAGCTGTGGATGCACTCGTCTCTGTTAACCTGACGGAAGCTGCGGAGATCACTGAAAAACTGCTCAGAACGATCAGCCAGAGAGCTCTCAGCATCCAGAAGGCCTGAAACGA
11:40250822-40251117_59	CTGAAAAACTGCTCAGAACGATCAGCCAGAGAGCTCTCAGCATCCAGAAGGCCTGAAACGAAAACACACTGTAACATCTGTGCATAGAAAACATCATGTAAAATCTAGAGTTAATCATTA
11:40250822-40251117_118	GAAAACACACTGTAACATCTGTGCATAGAAAACATCATGTAAAATCTAGAGTTAATCATTAATACAGCATTTAAATAACTGACCTGCTATCCAGTCATAGCCCAGTAAAGGCTGCATGCG
11:40250822-40251117_175	ATTAATACAGCATTTAAATAACTGACCTGCTATCCAGTCATAGCCCAGTAAAGGCTGCATGCGTCTATCTGATGTAGTCTCCATCTGTAGTCCAGCAGTCGAGGCTCTGTCAGCTTCTCT
11:40252158-40252401_0	AATATGTCACTGTCTGCTGTAAGATCTGCAGATTTGGGCAGCATTAGTCTCACAGTTCGGCATTGTCCTGTCCAGCGACTGTTCCCCGTGTCCTGCAGGAGTGTACCATAGGCGGTCGCT
11:40252158-40252401_62	TTGTCCTGTCCAGCGACTGTTCCCCGTGTCCTGCAGGAGTGTACCATAGGCGGTCGCTTCTGAACTTTGACTGTGTGTGAGTTTATGTAGGTCCAGTGTGCGGTTTTCAAAATCTGCAGG
11:40252158-40252401_123	GAACTTTGACTGTGTGTGAGTTTATGTAGGTCCAGTGTGCGGTTTTCAAAATCTGCAGGAAGCTGTTCATCTAAAGACACAAAGCAAATTCATCAGTAATATGCATATTTACCATGATTT
11:40255283-40255741_0	GCATATTTGGATTGTTTTCCTCGCTGTAGAAGCTGAAGCTCGCGGCGGCTGCTCTCCGTTTTTCTCTTTTAAAGGCGCTCGATTTAAGGTAAATCCTTCGCAGACAGAGCTCAGATTTCT
11:40255283-40255741_57	GTTTTTCTCTTTTAAAGGCGCTCGATTTAAGGTAAATCCTTCGCAGACAGAGCTCAGATTTCTGTCCACCTCCTGAGAGTCGGAGATGATCATTTGATGCAGTTTCTCGCTTTGTTTCTT
11:40255283-40255741_114	ATTTCTGTCCACCTCCTGAGAGTCGGAGATGATCATTTGATGCAGTTTCTCGCTTTGTTTCTTAAGTTTTTCCAACAAATCTCTGTTCTTCTTTCGCAAAGCGTCGAGCTCCTCGAGCGC
11:40255283-40255741_171	TTTCTTAAGTTTTTCCAACAAATCTCTGTTCTTCTTTCGCAAAGCGTCGAGCTCCTCGAGCGCCGCCATTGCGTCGCCATAGCAACCAGTTAAAAGCTAAGTTCGCGATTCATTATTGGC
11:40255283-40255741_228	GAGCGCCGCCATTGCGTCGCCATAGCAACCAGTTAAAAGCTAAGTTCGCGATTCATTATTGGCGGGTCAAACTAAATGGCATACGGTACTTGTACGTATCTGAGGGATAAACGTAACATT
11:40255283-40255741_285	ATTGGCGGGTCAAACTAAATGGCATACGGTACTTGTACGTATCTGAGGGATAAACGTAACATTATTAAACGATGTTGCGGTAAATGTGGTGAAATAAGAGGTATTAGCAGATCGTAAACT
11:40255283-40255741_338	ACGTAACATTATTAAACGATGTTGCGGTAAATGTGGTGAAATAAGAGGTATTAGCAGATCGTAAACTTCCGTCAACACATACAACGGTTGAACTCAAACAATGCGCAGTCCACTGTGATT
11:44066771-44067321_0	CAACCCAACATGGAGCAGTTTTCATTCAAATCAACTGAGCTGTTTGGCTCCTGAATCCTGAACGCAGCGTAAAGCTCTTGGTCCTTCGGGAAATCTGCATCAAACATGTACAAGAGCTGA
11:44066771-44067321_62	CGCAGCGTAAAGCTCTTGGTCCTTCGGGAAATCTGCATCAAACATGTACAAGAGCTGAACCTGTGGGATCATCCTGTAGAAGCAAACAGAACCGGCCTCCTGGTCCACAAACACACCGAG
11:44066771-44067321_124	GTGGGATCATCCTGTAGAAGCAAACAGAACCGGCCTCCTGGTCCACAAACACACCGAGCCTCCGGATGGACTCAGTGGTTTGGACCGATTCCCTCTTCTTGTCATGATAAGCCACACATT
11:44066771-44067321_186	CGGATGGACTCAGTGGTTTGGACCGATTCCCTCTTCTTGTCATGATAAGCCACACATTCAGTTCTGGAGCAACACAAACTCCAAGACATCTTATTGTGTCCCAGACATACTGTAGAACCT
11:44066771-44067321_248	TCTGGAGCAACACAAACTCCAAGACATCTTATTGTGTCCCAGACATACTGTAGAACCTGGCCCCTTCCGCTCAAGTCCCTTACAGGCCACGCCTACATGCACATCTGGCCCAATCACATC
11:44066771-44067321_310	CCTTCCGCTCAAGTCCCTTACAGGCCACGCCTACATGCACATCTGGCCCAATCACATCCACTGTAAAGAAGCAGCGTCCGGTCAGGGGCTGATGGGAAAGGACCTGGTTGCATACGTTAA
11:44066771-44067321_372	GTAAAGAAGCAGCGTCCGGTCAGGGGCTGATGGGAAAGGACCTGGTTGCATACGTTAAATCTCTGCTCATTAGGGGGGAGCTGCAGTTTCTCCTTCTGTCGAGTGGCTAAAGTGTTGTCC
11:44066771-44067321_430	ATCTCTGCTCATTAGGGGGGAGCTGCAGTTTCTCCTTCTGTCGAGTGGCTAAAGTGTTGTCCTCACTCAGGAGGAGATGATCATTAGCCGTCTGAGGGTCAAAGGTGAGCGCCACCGTAT
11:44070046-44071831_0	GAGCCTTTCTGACGTATCTGAAGGCTGAGGAGAGTCTCTGAAACCCTTCTAAGGTGATGCTGTATTTCCTGAGGTCAAACTCAATGTGTTTTTCATCCGAAATCCTCAAGTGGTAAGCCA
11:44070046-44071831_62	TATTTCCTGAGGTCAAACTCAATGTGTTTTTCATCCGAAATCCTCAAGTGGTAAGCCAGAAGTGTGCACTGGAACAGTGTGAGGGGCTCTTTGGATTGTGAGCGTTCAAGCTCTGGCAAA
11:44070046-44071831_124	TGTGCACTGGAACAGTGTGAGGGGCTCTTTGGATTGTGAGCGTTCAAGCTCTGGCAAATTCTGCAAAAAAGACCTGTCCTTGAGCTCAAGGAGGCACCGAATGAGACTAACGCATCGCTC
11:44070046-44071831_186	GCAAAAAAGACCTGTCCTTGAGCTCAAGGAGGCACCGAATGAGACTAACGCATCGCTCAGAGGACAGATCTCTCCTCCTCAGGGACTTAATGTATATGGTCACTTTTTTGTGCTCAGGTG
11:44070046-44071831_248	GACAGATCTCTCCTCCTCAGGGACTTAATGTATATGGTCACTTTTTTGTGCTCAGGTGAACTATTGCCCCTGAATGGAGGCAGGAATGCTTCAAGTAGACGTCTGTTGGAATCACAGGAA
11:44070046-44071831_310	ATTGCCCCTGAATGGAGGCAGGAATGCTTCAAGTAGACGTCTGTTGGAATCACAGGAAATCCCAAAGAGGAAACAAGTGAAAAGGTCCAAGTGTCCACTCTCAGTCTGCAAAACCACATT
11:44070046-44071831_372	CAAAGAGGAAACAAGTGAAAAGGTCCAAGTGTCCACTCTCAGTCTGCAAAACCACATTAGTCACATCTTTGAGGAAATCGCTCAAAGTAGATTTCTCTTTCTTTTTGCCAGTTCCTATTT
11:44070046-44071831_434	ACATCTTTGAGGAAATCGCTCAAAGTAGATTTCTCTTTCTTTTTGCCAGTTCCTATTTTCAGGGAGTCTTCATTGTTTAACAGAAATTGACGGTATGCAAACAAGGCTGCAAAGAATTCC
11:44070046-44071831_496	GGAGTCTTCATTGTTTAACAGAAATTGACGGTATGCAAACAAGGCTGCAAAGAATTCCTGCACCGTGAGATGAACGAAGCTGAAAAACGTGGTCTTGTTGTAAAACATATTTTTGTAGCA
11:44070046-44071831_558	CCGTGAGATGAACGAAGCTGAAAAACGTGGTCTTGTTGTAAAACATATTTTTGTAGCATGAGAGGCAGGTCAGAACGCCAGGATTCTGAGGCACTTCATCTACAGTGATGTTGTACTTCA
11:44070046-44071831_620	AGGCAGGTCAGAACGCCAGGATTCTGAGGCACTTCATCTACAGTGATGTTGTACTTCATCAAATCTTCTTTACTGAAGATGGAGTTCTTTTCTTTCAGCTGCCAGTACGCTAGCTCGGCC
11:44070046-44071831_682	ATCTTCTTTACTGAAGATGGAGTTCTTTTCTTTCAGCTGCCAGTACGCTAGCTCGGCCATATTCATGATCTGTTCGCTGTGCTCCTGGAGAGCATCTTCTTCTGAAAGATCCTCTACCTG
11:44070046-44071831_744	TCATGATCTGTTCGCTGTGCTCCTGGAGAGCATCTTCTTCTGAAAGATCCTCTACCTGATACTTCTTGTGGCTCAACCCAGTCTGAATCAGCAGATAGTGGATGTACAATTCCGTCTGAT
11:44070046-44071831_806	TTCTTGTGGCTCAACCCAGTCTGAATCAGCAGATAGTGGATGTACAATTCCGTCTGATTGGAAGGCATGATTTGATTCTGATTTTGATTTGCAGTGATGTGTTTGAGAACATGAAATGTA
11:44070046-44071831_868	AGGCATGATTTGATTCTGATTTTGATTTGCAGTGATGTGTTTGAGAACATGAAATGTAATCCAAGAAAACAGAGGTATGTGGCACAAAATCCACAGGCTCTTCTGAGACTTCAGGTGACT
11:44070046-44071831_930	AAGAAAACAGAGGTATGTGGCACAAAATCCACAGGCTCTTCTGAGACTTCAGGTGACTGATGACCTTTTGGGAGAGCGCTGGGTCAGCAAATTGGCTCTTGAAGTACTTCTCCTTCTGCT
11:44070046-44071831_992	ACCTTTTGGGAGAGCGCTGGGTCAGCAAATTGGCTCTTGAAGTACTTCTCCTTCTGCTCATCTCTGAATCCCCTGATTTGAGTTTTGTATCCATGTTTGAAGATGTGGGATGGAAGTTGT
11:44070046-44071831_1054	TCTGAATCCCCTGATTTGAGTTTTGTATCCATGTTTGAAGATGTGGGATGGAAGTTGTCCAGCGGCGACGGGTCGGCTGGTGATCCACAGGTGTGCAGATGGAAGCAGTTTTCCCAATAG
11:44070046-44071831_1116	CGGCGACGGGTCGGCTGGTGATCCACAGGTGTGCAGATGGAAGCAGTTTTCCCAATAGGAGGTTTACTAGAAGCACATCAACTGTGGCCTTTTCGGTTTCACTTGACAAAAAGCGGCTTT
11:44070046-44071831_1178	TTTACTAGAAGCACATCAACTGTGGCCTTTTCGGTTTCACTTGACAAAAAGCGGCTTTTAAAGTTCAAGGGCTGACTGTATTCATCCAGACCATCTAAGATGAACAGAACTTTCCTATCC
11:44070046-44071831_1240	GTTCAAGGGCTGACTGTATTCATCCAGACCATCTAAGATGAACAGAACTTTCCTATCCCAGATCCACTCAGAGATCTGTCTTGCCTTTTTTAACATGGGGTAAAAATCAAAAAGCACATC
11:44070046-44071831_1302	TCCACTCAGAGATCTGTCTTGCCTTTTTTAACATGGGGTAAAAATCAAAAAGCACATCTAGAAGACTCTTTTCTCCCTCCAGCAAGTTCAGCTCTCGGAACGGGAGCAGAAACACAAGCT
11:44070046-44071831_1364	AGACTCTTTTCTCCCTCCAGCAAGTTCAGCTCTCGGAACGGGAGCAGAAACACAAGCTCTAGATCCTGATTGGCTTTTCCGTTTGCCCAGTCGAGGATAAACTTCTGAATGGTGACCGTT
11:44070046-44071831_1426	ATCCTGATTGGCTTTTCCGTTTGCCCAGTCGAGGATAAACTTCTGAATGGTGACCGTTTTCCCGATTCCGGCAATTCCTTTGGTTAAAACAATCTTCACAGTCTCAGCTCCATCATCAGG
11:44070046-44071831_1488	CGATTCCGGCAATTCCTTTGGTTAAAACAATCTTCACAGTCTCAGCTCCATCATCAGGCGACTGCAGGATTTGATTATAGGTTACGACGGTTTGCTTTGATGAGTTGAACTCATGTGTTT
11:44070046-44071831_1550	TGCAGGATTTGATTATAGGTTACGACGGTTTGCTTTGATGAGTTGAACTCATGTGTTTTCTCATCCTGCCAGATCTCATGTTCTCTATTGATGGGATCCGAGTCATCGTTGATGATAAAC
11:44070046-44071831_1612	ATCCTGCCAGATCTCATGTTCTCTATTGATGGGATCCGAGTCATCGTTGATGATAAACAGTTCTGTGTACATCTTGTTTAGACAGACAGATTCAGATGCACATCCCTCAAAAGTCCTACC
11:44070046-44071831_1665	TAAACAGTTCTGTGTACATCTTGTTTAGACAGACAGATTCAGATGCACATCCCTCAAAAGTCCTACCAAAGTCTTTCTCCATTATTGTTTTCATCTCATTCTTTAGGTTTTGGAAGATCT
12:4545360-4545610_0	TAGCAGAGCTCCATCATTTGCTCCAGGGAAAGCTGCAGCTCGTCTGACTGCAGTGAAGACGCTCCTTGTTCAACAGCCATAGACTTCAAAAACTCCAGTGCGGTCAGATTAACCTGAGCA
12:4545360-4545610_65	TTGTTCAACAGCCATAGACTTCAAAAACTCCAGTGCGGTCAGATTAACCTGAGCAGATGAGAAAGAAACATGCAAATCAGTCATGATGCACTTTTTACATACAGTTAGAGTTTGTTGGAA
12:4547005-4547255_0	TCAATCATGATGAGTTTCTTCTCCCAAGGCTTCATTTTAGGGTCTGGCCACTTCTCCCCCAGGAAGAAGTAAAGAGTGCAAGAAGGAGATTCACCTCCTGTCTGAATAAACTGCATCAAA
12:4547005-4547255_65	GAAGTAAAGAGTGCAAGAAGGAGATTCACCTCCTGTCTGAATAAACTGCATCAAACCTACAGAACGATACACCATCAGACATCCATGTTTATTGAGATCGACCTCCTTAAAGGGACAGTT
12:4547005-4547255_130	GATACACCATCAGACATCCATGTTTATTGAGATCGACCTCCTTAAAGGGACAGTTCAGCCAAAATATATAATATGTAAGGCAGGGCATGAGTGGGACTCCTTTTTCAGCCCTGGAGTTTC
12:4547830-4548287_57	GTGCCTGATATAAGGATTGGAACAACTTGAGGGTGTGTAAATAGTTGTGATTTTTTGGTGAACTGTGCCTTTAATAATAAGCATGCTGTTTACCTAAATGGGATAAATGTAATATGACCC
12:4547830-4548287_114	GTGAACTGTGCCTTTAATAATAAGCATGCTGTTTACCTAAATGGGATAAATGTAATATGACCCACCTGAAATGTAATCTTTCATGAGGTAAATGGGTTGAGGTGTGTTTTTGGACAGTTC
12:4547830-4548287_171	TGACCCACCTGAAATGTAATCTTTCATGAGGTAAATGGGTTGAGGTGTGTTTTTGGACAGTTCTCTGGGTGTTTGGCTTCTTTCATGCTTGCACAGACCCCAGTAGATCCTGCTGGACCC
12:4547830-4548287_228	CAGTTCTCTGGGTGTTTGGCTTCTTTCATGCTTGCACAGACCCCAGTAGATCCTGCTGGACCCCCAACGGTGACCGTGAATCACTCCGTCTGATCTCCGAATCTCCAGACCACCCAGATT
12:4547830-4548287_285	GGACCCCCAACGGTGACCGTGAATCACTCCGTCTGATCTCCGAATCTCCAGACCACCCAGATTATCCAGAATATCATTAGTAAGCCTGGTCTGCATTTGATCCGGCATTCCTTCAGCTGG
12:4547830-4548287_337	CCACCCAGATTATCCAGAATATCATTAGTAAGCCTGGTCTGCATTTGATCCGGCATTCCTTCAGCTGGAGGAAGAGTGACCACTGGGAGACCCGCACCATCCTGCAGGCCTGACTCATCC
12:4548681-4548930_65	AGGCTAAAGTGTGCCTTCACTATTCATCAAGCATGAGCCTGTGATGTAAATGTAAAGAGCGGTCATAAAATCATGAAAACCAACATGTTTCTGTGGTACATCAGTCTGAAACCAGAGTCG
12:4548681-4548930_129	ATAAAATCATGAAAACCAACATGTTTCTGTGGTACATCAGTCTGAAACCAGAGTCGTTCTCCACCAACTGCTCCATCACCATTTTCCCTTTATAATAAACCTTGATCCGAAAAAATGTCG
12:4552517-4552765_0	CAGATTTGGCTCAGGAATGGCAGTGTGATCAGGTACAGCTCCTAAATGTGGTTGAGTGGCAGTCTGTTGATATTCCCGAGAAATGTGATTGACAGCCATCGCTCCCTCAGTTGGCGAAAT
12:4552517-4552765_64	TGTTGATATTCCCGAGAAATGTGATTGACAGCCATCGCTCCCTCAGTTGGCGAAATCTGTCCCAAACCACCGACAGCACCTTCATCTGAGGAGGATATGGCTTCAATAGGGACCACTGCT
12:4552517-4552765_128	AACCACCGACAGCACCTTCATCTGAGGAGGATATGGCTTCAATAGGGACCACTGCTTGAAAATCGTATATCTGGGTTCCTGGATCCACATATAAGTCATTTGGATTCAAAATGATATGGA
12:4556603-4556850_0	TGCAGAATGAGGATCGGAGGGAAACTGATAGACTTTATGTGGATCGGCGCCATCATTCTTTTTGTCAGATATCATTTTGAAGCCTTTAGCGCGAAGAGCACTGCGAAAGTTTCTCTTCCA
12:4556603-4556850_64	TCAGATATCATTTTGAAGCCTTTAGCGCGAAGAGCACTGCGAAAGTTTCTCTTCCACACAGACGGATCTCCATTCAATCTGCCATCACCAGCAGCGCTAGTCTGAGCCCACGCCTGACGA
12:4556603-4556850_127	GGATCTCCATTCAATCTGCCATCACCAGCAGCGCTAGTCTGAGCCCACGCCTGACGAGAGATACAAAATTGCTTAATATTTTTTTTACTTAAACCTTTATTTTATTAGGAAAGCCTCTTG
12:4558400-4558650_0	TGTTTAATATAGAAAAGTTAAGCATATTTTTACCTTGAATATGAGCACATCGTCGCTGTTGGAGTCCTGTCTCAAAGCGTGTTTCCAGGGAATGCTGAACTGGGTACAGTCTTCATTTTT
12:4558400-4558650_65	CCTGTCTCAAAGCGTGTTTCCAGGGAATGCTGAACTGGGTACAGTCTTCATTTTTCCAGCATACTCCAGGATAACGTCCACTCTGGATTTGTTCATACAACCAGGGCACGAACAGCGGTT
12:4558400-4558650_130	CCAGGATAACGTCCACTCTGGATTTGTTCATACAACCAGGGCACGAACAGCGGTTTTGCTTGAGTCATGATGCAGTCAGACTATACAGCACAACATTCATCAATAGACAGGACCTGTACA
12:4563000-4563250_0	TCAATGGTAACTTACCTTGCAAACAGAAGCGACAGTTGTTTGTGGCCTCGTGTGTTTTCAGCGAGCTCTTCCTCAGATGTAAGAGATGTAAGTAGACAGAACTGCTTGTCAATGTTGTTT
12:4563000-4563250_65	CTCTTCCTCAGATGTAAGAGATGTAAGTAGACAGAACTGCTTGTCAATGTTGTTTTAATACTGAGCTTTATTCAGCAGACTGTGCTTTACGATCAGGTTTTAAACATTACTCGGGAAACC
12:4563000-4563250_130	CTTTATTCAGCAGACTGTGCTTTACGATCAGGTTTTAAACATTACTCGGGAAACCCATATCAGTTTCGATTTCCCCTTTTCGCGTCATTACACACGTCACCGTAAGTTATTTTACCCTGC
12:4876950-4877200_0	AATAAAGGGGAAGCTCCTGTTTTAAACATGAGTGTGGAAGGAGAAGGAGTGCAGCTGATTCATCAAACTGATCACTCGTTTTCTGACCATCTCCCAGCTTCTGCCTCCATCCTGAAAGAG
12:4876950-4877200_65	AACTGATCACTCGTTTTCTGACCATCTCCCAGCTTCTGCCTCCATCCTGAAAGAGGAACACAACAAATCATTTAGATGTTGATTTTTATAGATTTGACATTTTTGTAGCAGCAAACCATC
12:4876950-4877200_130	AATCATTTAGATGTTGATTTTTATAGATTTGACATTTTTGTAGCAGCAAACCATCAAGGAACAGGAAATTGTTTAACCATAACCTCTTGTTTCAGGAATGATTTTTGCTGCTTGTTCAAA
12:4878744-4880109_0	GTGTTCAGCTCTGTCATTCTTCTCAGTCTGTTAAAGTACAGATGCAGCTTCTTGTTCCTCTTCATTTTGTAAGAGCCCTGCACCGAGAAACAAGACGAATGATTATTTCTGACTCTTGAT
12:4878744-4880109_63	ATTTTGTAAGAGCCCTGCACCGAGAAACAAGACGAATGATTATTTCTGACTCTTGATGATATTATGCCCATGAAGACAAACATATTAGCCCTCCTGTCAACTTTTCAATCCCTAACAGAG
12:4878744-4880109_126	ATGCCCATGAAGACAAACATATTAGCCCTCCTGTCAACTTTTCAATCCCTAACAGAGATAATTTGAGTAAAAGACAGGGTGTTTTTTTCAGTGTTAATATATTTGTTATTAAGAAAGTCT
12:4878744-4880109_189	TGAGTAAAAGACAGGGTGTTTTTTTCAGTGTTAATATATTTGTTATTAAGAAAGTCTTATTTTTTTATTTTGTTTGGGATTATTTTTCATTATTTATGAACTGAATACAGAACAAACCAC
12:4878744-4880109_252	TTTATTTTGTTTGGGATTATTTTTCATTATTTATGAACTGAATACAGAACAAACCACTTTTGATCAATAACTTATAAGTTATAAGTAATGGGTAAGTCAAAAGTTAAGTCTTTAAATCAC
12:4878744-4880109_441	ACAAAAGAAACCAGTTATTAGAAATTATAGAAAAATTATTACGTTTAAAAAGACAAATATTGGGAAATATTTGAAAAACACATTTAAAACTGTTATATATGAGGGCTGATAATTTTAGAT
12:4878744-4880109_504	GAAATATTTGAAAAACACATTTAAAACTGTTATATATGAGGGCTGATAATTTTAGATTATCTGTAAATACTCACGCATGAGCGCAGTCCATCAATCTCCTCATGCATGATGTTTAGGAAA
12:4878744-4880109_567	TAAATACTCACGCATGAGCGCAGTCCATCAATCTCCTCATGCATGATGTTTAGGAAATCATCCATTTTTTTAGCATCCCAGGGAACAAGTGCATCGTCGAAGAGGGCAGTGATTTCCACC
12:4878744-4880109_630	ATTTTTTTAGCATCCCAGGGAACAAGTGCATCGTCGAAGAGGGCAGTGATTTCCACCAGAGCCTGAATGACGAACTGGATCTGCTTCTCAGGCTGTAGGAAACATAAAGGTAACACTATA
12:4878744-4880109_945	TAAAATAAAGTGTGACCAAAATATAAATAGACAAATAATGAATATATCAGTCATATTCATACACTGTAAAATAGACAAAAAGTCATGACTACAAATGTTTTTAAGTTACTTTAACTTAGT
12:4878744-4880109_1134	TGATATAAGTTGAAATGACTAGAAAAGTTCATTTGATTCAACTAAAAAAGCAATAAATAAAAAAGTAATAAAGCAAAAAATAAGGCAGAAATCATTTATTTGCAGTGCAGCACATATTAG
12:4878744-4880109_1197	AGTAATAAAGCAAAAAATAAGGCAGAAATCATTTATTTGCAGTGCAGCACATATTAGGGAATCTGTCTGAGTAAAATATGCGTGACTGACCTCTGCCATCCTGTGATTATTGATCAGGTC
12:4878744-4880109_1245	ACATATTAGGGAATCTGTCTGAGTAAAATATGCGTGACTGACCTCTGCCATCCTGTGATTATTGATCAGGTCATATGGGATGGGGTTGAGGTCCTCATTGTCATCATGGACTTTTTCACC
12:4881752-4882012_0	TTACAACAAGAATGATTTGAAGACATTTTAAGTTAACTTTTTTCAGTTTTAGGTGAACTATCCCTTTAAAGACTCTAAGCAGAAAAAAAAACGTTCAACCCCCCTTGGTTCAAACTCACC
12:4881752-4882012_47	TTTAGGTGAACTATCCCTTTAAAGACTCTAAGCAGAAAAAAAAACGTTCAACCCCCCTTGGTTCAAACTCACCATCTTCCTGAGGAGATCCAGAGAGACCCCGTGGTGATGCTGAAGTCT
12:4881752-4882012_94	TCAACCCCCCTTGGTTCAAACTCACCATCTTCCTGAGGAGATCCAGAGAGACCCCGTGGTGATGCTGAAGTCTGTGTTTGACCCAGCGGCAGCCCAGCACAGAGCTGAAACCGACCGACA
12:4881752-4882012_140	AGAGACCCCGTGGTGATGCTGAAGTCTGTGTTTGACCCAGCGGCAGCCCAGCACAGAGCTGAAACCGACCGACAGGAGCACACAGAACTGCGCAGCCGCAAACACCTTCATCCCGCTCTT
12:13245330-13245580_0	AATCCACATTCCAACTCGATCAGTTCTAAAATTGCTTTGACATATTGCAAAATTGGAACTCAAATGAATTAAAGTTCTTATTTTTAATAAACCATTATGAATTTGTGTAAATTAAACAAA
12:13245330-13245580_65	GAATTAAAGTTCTTATTTTTAATAAACCATTATGAATTTGTGTAAATTAAACAAATACATGGTATTTTTTATTGTTACAGGTGTTACAATTATCGTAACTGGAGCTGTCATTGTATGATT
12:13245330-13245580_130	TTTTTATTGTTACAGGTGTTACAATTATCGTAACTGGAGCTGTCATTGTATGATTCTTTTCAGATGGCATCTGGAAGGATACGCTCCACACGCCGTCTGCGTTCATGGATAGTAGAACAG
12:13246316-13246568_0	TTAGATGTTTTTACTGGTTTAAACAGCAAAGTCATGCAATTAATTTCTCGCAAAGCTGTCTAATTCTGCTGTAGTTTGCTGTTGTTGAGTTAGATTTTTATTTTTCATTGTGTGTGCTGT
12:13246316-13246568_66	TGCTGTAGTTTGCTGTTGTTGAGTTAGATTTTTATTTTTCATTGTGTGTGCTGTGGGATGTAGGTGAATAGTGGGAAGTATCTCGGCCTGGTTTGGGACAACCCAGAGAAAACCATGTTT
12:13246316-13246568_132	AATAGTGGGAAGTATCTCGGCCTGGTTTGGGACAACCCAGAGAAAACCATGTTTCGCATCCCATGGAAACATGCAGGAAAACAAGACTTTCGCAGTGAGGAAGATGCAGCTATTTTCAAG
12:13249550-13249800_0	CTTTGAACTAAATAATAATTTAAACTTTTCCAATCATAGGCTTGGGCGGCGTTTAAAGGGAAGCTCATGGAAAATGGAAATTCGGACCCTGCGTCCTGGAAAACACGCCTTCGATGTGCC
12:13249550-13249800_65	CATGGAAAATGGAAATTCGGACCCTGCGTCCTGGAAAACACGCCTTCGATGTGCCCTCAACAAAAGTCCAGAATTTAGTGAGGTCACAGAAAGGTCACAGCTGGATATTTCAGAACCCTA
12:13249550-13249800_130	GTCCAGAATTTAGTGAGGTCACAGAAAGGTCACAGCTGGATATTTCAGAACCCTACAAGGTGTATCGCCTTGTACCACCAGAAGAACAAGGTAGTCAACATGTGCTACACATTCTTTTGT
12:13254325-13254843_0	AGTGGTTAAAGTTAAAAAAGAGAATGGTCAGAAATCAGTGAGAAACAGCAAGAGGAAACACAGCGAATCTGAGAATGAACAGGAGACTGAAGGCAAGAAGATCAAAGAGGAGATTGTTGC
12:13254325-13254843_57	ACACAGCGAATCTGAGAATGAACAGGAGACTGAAGGCAAGAAGATCAAAGAGGAGATTGTTGCACCACAGGCCATCAACATGGTGAGGCATGCCTAACTTATGATGTAGTCATGCAAACC
12:13254325-13254843_114	TGTTGCACCACAGGCCATCAACATGGTGAGGCATGCCTAACTTATGATGTAGTCATGCAAACCAGAAAAACTTACCCTGCGTATGCATAATTTGATCAAGATTGTGCATAAAGATAAATT
12:13254325-13254843_171	CAAACCAGAAAAACTTACCCTGCGTATGCATAATTTGATCAAGATTGTGCATAAAGATAAATTTTGCACTCCACTGCTCAGTTTTTGCTGACTCTAATCTTCCTTTCTGATTTTCACAGA
12:13254325-13254843_228	TAAATTTTGCACTCCACTGCTCAGTTTTTGCTGACTCTAATCTTCCTTTCTGATTTTCACAGAGTGCACAGGAAATCTTCATAAATACAGGAAGTGCAATAACAATTGAAACAGGGATGG
12:13254325-13254843_285	CACAGAGTGCACAGGAAATCTTCATAAATACAGGAAGTGCAATAACAATTGAAACAGGGATGGAGAAGAGTGACAACAGTAATCATCTGATTTGATTCTATAAATTGTAACTGTTCTTTT
12:13254325-13254843_342	GGATGGAGAAGAGTGACAACAGTAATCATCTGATTTGATTCTATAAATTGTAACTGTTCTTTTGTGGTTAATGTTTAAATTAATGCAAAGTTTTATCATTGTTTGATTTTTCTTAGACAC
12:13254325-13254843_398	TTCTTTTGTGGTTAATGTTTAAATTAATGCAAAGTTTTATCATTGTTTGATTTTTCTTAGACACAGAAGATATCCAGTTAAACTTCACCATTGAAGCTGTACCTCTGGTCGAAAAGAGAG
12:13257148-13257552_0	ACTGCACACTTTTCACATAACCGTGCACTACATTGGTCAGGAGGTTTTGCGGCAAGAAGTAATGAGAAACGATGTCCGGATCTCTTACCTACCTCGCTCACCTGTTCCTCCATCTCTACC
12:13257148-13257552_57	AGTAATGAGAAACGATGTCCGGATCTCTTACCTACCTCGCTCACCTGTTCCTCCATCTCTACCATCTCTCAGTGGCTCCAACTTCCATCGAATCTTTCTCCCGGAACCTCCATCAGATAT
12:13257148-13257552_114	TCTACCATCTCTCAGTGGCTCCAACTTCCATCGAATCTTTCTCCCGGAACCTCCATCAGATATAAGCACAGACTCTAGTCTCGCCCCACGCTTGAATGCTCTTAAATCCCTGCTACCCTT
12:13257148-13257552_171	AGATATAAGCACAGACTCTAGTCTCGCCCCACGCTTGAATGCTCTTAAATCCCTGCTACCCTTCATGGAATGGGGAGTAGCGCTGACCTCCTTATCAGGAGGCATCTATGCCAAGCGCTT
12:13257148-13257552_228	ACCCTTCATGGAATGGGGAGTAGCGCTGACCTCCTTATCAGGAGGCATCTATGCCAAGCGCTTCTGCCAGGGACGGGTCTTCTGGAGAGGACCACATAGTTCCACCACAGGACCTTGTAA
12:13257148-13257552_284	AGCGCTTCTGCCAGGGACGGGTCTTCTGGAGAGGACCACATAGTTCCACCACAGGACCTTGTAAAATGGAAAGATCAGGCACGCCAACCCAGCTGTTTAACCGGGAGATATTTCAACAAG
12:13264992-13265244_0	GTTGGAATGTTTCCGCAATGGAGGAAAACAACCTCAAAGTGAGATCATTCTTTGTTTTGGAGAGGAGCTCTTGGAGGGAGATAACATCTCTGATAAACACATCATCATTAAGGTAAATGC
12:13264992-13265244_66	GCTCTTGGAGGGAGATAACATCTCTGATAAACACATCATCATTAAGGTAAATGCGTAATTGATGTACATATATAGATCATTACTACATTTGTCATTTAAGTTAAAGGGCACCAATGATGA
12:13268061-13268580_0	TATCTCTCCCTTGGGCTGAGGCGCAGATAGAAGAGGTCAAGGCCTTCAGAGAGTCCATTGCAATTCTCAAAAGTCTGGCCAGCCAGTCTCCTACAGGGGAAGTGACACTGAATTTTGTTG
12:13268061-13268580_57	TTGCAATTCTCAAAAGTCTGGCCAGCCAGTCTCCTACAGGGGAAGTGACACTGAATTTTGTTGAAGTATCGGAATAACCAGTAACAAACTTCTGAGAAAACACTCACTGCATTCTTGACA
12:13268061-13268580_114	TTGTTGAAGTATCGGAATAACCAGTAACAAACTTCTGAGAAAACACTCACTGCATTCTTGACATTATGGATCAAAATCACAAGCAAAATGACTTGAGACAACTAAAAGTAACATTGTCCA
12:13268061-13268580_171	TTGACATTATGGATCAAAATCACAAGCAAAATGACTTGAGACAACTAAAAGTAACATTGTCCAGTGGTAGTGAGTGTAAATGCTACATTTATTAGCTGCTTCAACTACTATATAAATATA
12:13268061-13268580_228	TGTCCAGTGGTAGTGAGTGTAAATGCTACATTTATTAGCTGCTTCAACTACTATATAAATATATAATCCTATCGCACTATTTATAAGTAGTTCAAAATGTTATTAGTCAGTGTAAGATTG
12:13268061-13268580_285	AATATATAATCCTATCGCACTATTTATAAGTAGTTCAAAATGTTATTAGTCAGTGTAAGATTGTGTTTCACTATTTGTAATTTGTAGCACTGTACAAATCTTGTGCTTTAAGAGATTTAA
12:13268061-13268580_342	AGATTGTGTTTCACTATTTGTAATTTGTAGCACTGTACAAATCTTGTGCTTTAAGAGATTTAATCGCATTAAATGCATTAATAACAATGTACACAATTTACTACAAATGGACTGTTACGT
12:13268061-13268580_399	ATTTAATCGCATTAAATGCATTAATAACAATGTACACAATTTACTACAAATGGACTGTTACGTTAAACGGTACAATTTCATCCAACGCTAATGTATCAATAAATATATCACTCGGCTAAA
12:22495786-22496318_0	TGATGTAAGTCTTGATCCCATGACCAACAACCCTTGGCTTTATGTTTCTGAAGACCACAAGAAGATTCAGGAGGGTCTAATAGAGGCCAATCTGCCTTACAGCTCTCAGCGCTTTGATAG
12:22495786-22496318_59	AGAAGATTCAGGAGGGTCTAATAGAGGCCAATCTGCCTTACAGCTCTCAGCGCTTTGATAGTTTGCCCTGCGTGCTAGGTTGGGAAGGCTACATGAGCGGCCGCCATTACTGGGAAGTGG
12:22495786-22496318_118	AGTTTGCCCTGCGTGCTAGGTTGGGAAGGCTACATGAGCGGCCGCCATTACTGGGAAGTGGAGTTTGCAAATAATGGTTATTGGAGAGTAGGAGTGACTACTGCCTCCTCAAAGAGGCAC
12:22495786-22496318_177	GGAGTTTGCAAATAATGGTTATTGGAGAGTAGGAGTGACTACTGCCTCCTCAAAGAGGCACGGCCGCTTCCCGATGAACCCATCAAGTGGTTATTGGGTCCTGTGGCGGAGCACAAGACA
12:22495786-22496318_236	ACGGCCGCTTCCCGATGAACCCATCAAGTGGTTATTGGGTCCTGTGGCGGAGCACAAGACAGTTCTTCGCCTGCACCAATCCTGAAACCCCCCTGCCACAGGAGCTGGTGCCCCGGAGAA
12:22495786-22496318_295	CAGTTCTTCGCCTGCACCAATCCTGAAACCCCCCTGCCACAGGAGCTGGTGCCCCGGAGAATGGGAATATACATTGACTATGAGGAGGGACAGATCTCTTTCTACAATGCCGACAACAAA
12:22495786-22496318_354	AATGGGAATATACATTGACTATGAGGAGGGACAGATCTCTTTCTACAATGCCGACAACAAATCACACATTTACACTTTCACTGGACACTTTCGCGAAAAGCTGTACCCTTTCTTTTCTCT
12:22495786-22496318_412	AAATCACACATTTACACTTTCACTGGACACTTTCGCGAAAAGCTGTACCCTTTCTTTTCTCTCATGGATGGCAGGACCCTTATGACCTTATGGTCTCCTAAAGAGCATAGCCACTTTTAA
12:22542703-22543301_0	CTCCTGTAATGTGGCGATTGACAATCAGACCTGCCACAAGCAGATCAAGGTGAGCTCAGATGGACGTAGTCTGTGTCTGTCCCCAGAGGAGCGCGGCGTCCCCAATGAGCCTGTGAGGTT
12:22542703-22543301_60	TGGACGTAGTCTGTGTCTGTCCCCAGAGGAGCGCGGCGTCCCCAATGAGCCTGTGAGGTTTGATCAGCTATACTGTGCACTGGGATCTACTGCTATTAAATCTGGCCAGCAGTACTGGGA
12:22542703-22543301_120	TGATCAGCTATACTGTGCACTGGGATCTACTGCTATTAAATCTGGCCAGCAGTACTGGGAGGTGGATGTGCACTGCTGTCCGTCATGGGCTGTGGGCATTACCTACGGCAGCTTGCAGAG
12:22542703-22543301_180	GGTGGATGTGCACTGCTGTCCGTCATGGGCTGTGGGCATTACCTACGGCAGCTTGCAGAGGAGAGGAAGAGACAAAGGAGCCAAACTGGGGCGAAACAGGTGCTCGTGGAGTCTTGAGTT
12:22542703-22543301_240	GAGAGGAAGAGACAAAGGAGCCAAACTGGGGCGAAACAGGTGCTCGTGGAGTCTTGAGTTTCAGAATGGGAATCTGACAGCCTGGCATAATGATCGACACATGCCGCTACCCGTCACTGC
12:22542703-22543301_300	TCAGAATGGGAATCTGACAGCCTGGCATAATGATCGACACATGCCGCTACCCGTCACTGCAGCTCGGGCAGCACCGAACAGAGTCGGGGTGTTTGTGAAGTACCAGAAGGGTCGTGTGGT
12:22542703-22543301_360	AGCTCGGGCAGCACCGAACAGAGTCGGGGTGTTTGTGAAGTACCAGAAGGGTCGTGTGGTGTTCTATGATGCTGAGAGCATGAGGACGCTGCAGGAGTTTTCAGCAGTGCAGACAGCTGT
12:22542703-22543301_420	GTTCTATGATGCTGAGAGCATGAGGACGCTGCAGGAGTTTTCAGCAGTGCAGACAGCTGTGTTTGACAGAGCGCATCATCAGTTTACTGAGCCGCTTTACCCAGCGTTTCGCTTCTTTTC
12:22542703-22543301_478	GTGTTTGACAGAGCGCATCATCAGTTTACTGAGCCGCTTTACCCAGCGTTTCGCTTCTTTTCACCCAAAGATAAGCATACAGGCCATCATCATATGCAAATATGTGACCTTAGTCTTTAA
12:41080750-41081270_0	CAGCTCCAGTGATCCTGAACCCAAACACGGCTGACGTGTGTGTGTCTCTATCCGACGACCTCACCACCATCCGCTACAGTGAAGAAGAGCAGCTCCTGCCTGAAAACCCAGAGCGCTTCA
12:41080750-41081270_58	CCTCACCACCATCCGCTACAGTGAAGAAGAGCAGCTCCTGCCTGAAAACCCAGAGCGCTTCAGCTTCTACGAGTGCGTCCTGGGCTCAGAGGGCTTGGTCTCGGGGCGGCACAGCTGGGA
12:41080750-41081270_116	TTCAGCTTCTACGAGTGCGTCCTGGGCTCAGAGGGCTTGGTCTCGGGGCGGCACAGCTGGGACGTGGAGGTAGGAGACTGCAGCGAATGGGCTTTAGGGGTGGTCAAAGAGAGCGTTCAA
12:41080750-41081270_174	GGGACGTGGAGGTAGGAGACTGCAGCGAATGGGCTTTAGGGGTGGTCAAAGAGAGCGTTCAACGCAAAGAGTGGTTTCCTCCGAGTCCTGAGCGCGGTATGTGGACTGTGGGGCTGTACG
12:41080750-41081270_232	TCAACGCAAAGAGTGGTTTCCTCCGAGTCCTGAGCGCGGTATGTGGACTGTGGGGCTGTACGGAGGAGAGTATCGCGCCCGGACGCCCACCAGCGCTCCTCTCAAACTCAAGAAGAAGCC
12:41080750-41081270_290	TACGGAGGAGAGTATCGCGCCCGGACGCCCACCAGCGCTCCTCTCAAACTCAAGAAGAAGCCGCAGAAGATCCGCGTTCAGCTGGACTGTGAAGCCGGTAGAGTCACGTTCTCCGACGCC
12:41080750-41081270_348	AGCCGCAGAAGATCCGCGTTCAGCTGGACTGTGAAGCCGGTAGAGTCACGTTCTCCGACGCCGCTGATAACTCAATTATATACAAGTATAAGAATAAGTTCACTGAGAAGGTGTTTCCGT
12:41080750-41081270_400	CTCCGACGCCGCTGATAACTCAATTATATACAAGTATAAGAATAAGTTCACTGAGAAGGTGTTTCCGTATTTCTCCAACACTTGTAAAAGGCATCCAATGCATATTTTAGCAGAGAAGGT
12:44856780-44857300_0	ATTTATTTATTTTTATAATTCCCAAGTGACGCTTAACAGAGCAAGGCCTTTTCAGGGGTTTTTTTTTGGACTTGGCTGGAATAAAATCAGTTTCTAATTTTTAAATGTGGGTTTCAAATT
12:44856780-44857300_58	TTTTTTTTTGGACTTGGCTGGAATAAAATCAGTTTCTAATTTTTAAATGTGGGTTTCAAATTTTTTTAATTTTTAAACATGGACATTTTTAAACCTAATTAATTAACAAAAAATTTAAAA
12:44856780-44857300_116	AATTTTTTTAATTTTTAAACATGGACATTTTTAAACCTAATTAATTAACAAAAAATTTAAAAATAAACTGCTCGTTTAATATTATTGCTGTTGTATATATTACTGTTAAGGATTTTAGAA
12:44856780-44857300_174	AAAAATAAACTGCTCGTTTAATATTATTGCTGTTGTATATATTACTGTTAAGGATTTTAGAAAAATAATTTTAAAGGTAAATTCAACTGTTAGTCATACGCTGGATCTGAAGAGCAACAC
12:44856780-44857300_232	AGAAAAATAATTTTAAAGGTAAATTCAACTGTTAGTCATACGCTGGATCTGAAGAGCAACACGGTTACAATTGCCCCATACTATAATATTTCTGAAAACTTCAATCATGAAGACATCTGA
12:44856780-44857300_290	ACACGGTTACAATTGCCCCATACTATAATATTTCTGAAAACTTCAATCATGAAGACATCTGAATAATTCATGATCAAATCCTACCTGCCAGGTGTGGTCGAAGCGGGACTCGTCGGCTGG
12:44856780-44857300_348	CTGAATAATTCATGATCAAATCCTACCTGCCAGGTGTGGTCGAAGCGGGACTCGTCGGCTGGGACAGGGCGGGGTCCTGAGACCAGATGCTCCGCCCTCCTGTTGCTCTGGGAGAGGCGC
12:44856780-44857300_400	CGTCGGCTGGGACAGGGCGGGGTCCTGAGACCAGATGCTCCGCCCTCCTGTTGCTCTGGGAGAGGCGCAGGTGAGCGTTGGCTGTGCGGGGGTCAAAGGTCAGGGCGCAGTGGTCTGGGT
12:46685240-46685823_0	CGTCACTCCTCTGTCTCTGGATGCCAATACGGCGCATGTGTTTCTGCGTCTGACAGAAGAGTGTAAGAAGGTGACCAACACCACACCATGGCAGCACAGCTATCCAGATCTCCCAGAGCG
12:46685240-46685823_58	GAGTGTAAGAAGGTGACCAACACCACACCATGGCAGCACAGCTATCCAGATCTCCCAGAGCGCTTCCAGGACTTCAAGCAGGTGCTGACGCAGGAGAGCTTCTACCTGGGACGCCACTAC
12:46685240-46685823_116	AGCGCTTCCAGGACTTCAAGCAGGTGCTGACGCAGGAGAGCTTCTACCTGGGACGCCACTACTTCGAGGTGGACATGAAGGGTGAAGGGACACATGTGGGTCTGACCTACAAGAGCATCG
12:46685240-46685823_174	CTACTTCGAGGTGGACATGAAGGGTGAAGGGACACATGTGGGTCTGACCTACAAGAGCATCGATCGCAAGGGCTCACAGAGCAACAGCTGCATCGCTGGAAACAACTTCTCCTGGTGTTT
12:46685240-46685823_232	ATCGATCGCAAGGGCTCACAGAGCAACAGCTGCATCGCTGGAAACAACTTCTCCTGGTGTTTGCAGTGGAACGGCCGCAGCTTCTCCGCCTGGCACAGCGATGTGGAGACGCCACTCAGC
12:46685240-46685823_290	GTTTGCAGTGGAACGGCCGCAGCTTCTCCGCCTGGCACAGCGATGTGGAGACGCCACTCAGCTGCCCCAAAACCACCCACATCGGCATCTACGTGGACTATTCTGGAGGCCTTCTGGCTT
12:46685240-46685823_348	CAGCTGCCCCAAAACCACCCACATCGGCATCTACGTGGACTATTCTGGAGGCCTTCTGGCTTTCTATGACGTGGAGAATGGGATGACGCTCATCCACAAGTACCAGGCAGAGTTTCTGGA
12:46685240-46685823_406	GCTTTCTATGACGTGGAGAATGGGATGACGCTCATCCACAAGTACCAGGCAGAGTTTCTGGAGCCGCTTTATCCTGCTTTCTGGCTCCCCAAGAAGGAGAACGTGGTGCTGCTGGAGCCT
12:46685240-46685823_463	CTGGAGCCGCTTTATCCTGCTTTCTGGCTCCCCAAGAAGGAGAACGTGGTGCTGCTGGAGCCTGGAGCTGCGTCTCCTCTGTCTTCTCCATCTCCATCTCCTGATGCTTCCACTAAATAA
13:2704297-2706084_0	CATGTCAAAATCTACAAGTCATTCAAAACAAACATGCTGAAGAAATGTCAGTGTCTGTCTGAGGCAACAGTAATGCAGGGAAACACAACACTGCTGAATGAGATCTACACAGAGCTCTAC
13:2704297-2706084_62	GGCAACAGTAATGCAGGGAAACACAACACTGCTGAATGAGATCTACACAGAGCTCTACATCACAGAGGGAGACAGTGGAGAGGTCAATACTGAACATGAGGTGAGACAGATTGAGGCACA
13:2704297-2706084_124	CAGAGGGAGACAGTGGAGAGGTCAATACTGAACATGAGGTGAGACAGATTGAGGCACAATCCAGGAGTACAGCACCAAAGGACACAGCAATCAAATGTAGAGACATCTTTATACCTTTAC
13:2704297-2706084_186	AGGAGTACAGCACCAAAGGACACAGCAATCAAATGTAGAGACATCTTTATACCTTTACCTGGACAACACAAACCCATCAGAACGATGCTGATGAAGGGAGTCGCTGGCATTGGAAAAACA
13:2704297-2706084_248	ACAACACAAACCCATCAGAACGATGCTGATGAAGGGAGTCGCTGGCATTGGAAAAACAGTCTCTGTGCAGAAGTTCATTGTGGACTGGGCTGAAGGGAAGGAGAATCAGGACATCCAGTT
13:2704297-2706084_310	CTGTGCAGAAGTTCATTGTGGACTGGGCTGAAGGGAAGGAGAATCAGGACATCCAGTTCATATTTCCTCTTCCTTTCAGAGAGATCAACCTGATGAAGGACAAAATACTCAGTCTTGCAG
13:2704297-2706084_372	TTTCCTCTTCCTTTCAGAGAGATCAACCTGATGAAGGACAAAATACTCAGTCTTGCAGATCTTCTTCATCTGTTTTTCCCAGAAACCAAAGAAATGGAGATACCCATTGACAGATATAAA
13:2704297-2706084_434	TCTTCATCTGTTTTTCCCAGAAACCAAAGAAATGGAGATACCCATTGACAGATATAAAGTGTTGTTCATCTTTGATGGTCTGGATGAGTGTCGTCTGTCTCTGGACTTTAAGAGTAATGT
13:2704297-2706084_496	TGTTCATCTTTGATGGTCTGGATGAGTGTCGTCTGTCTCTGGACTTTAAGAGTAATGTGAGACTGCATAATGTCTCTGAATCCGCCTCAATGGATGTGTTGCTGATGAACCTCATTGCAG
13:2704297-2706084_558	CTGCATAATGTCTCTGAATCCGCCTCAATGGATGTGTTGCTGATGAACCTCATTGCAGGGAATCTGCTTCTCTCTGCTCTCATCTGGATCACCTCCAGACCAGCAGCAGCAGATCTCATT
13:2704297-2706084_620	TCTGCTTCTCTCTGCTCTCATCTGGATCACCTCCAGACCAGCAGCAGCAGATCTCATTCCCTCTGAGTTTGTCCATCGATTGACAGAGGTACGAGGCTTTAATGACCCTCAGAAAGAGGA
13:2704297-2706084_682	CTGAGTTTGTCCATCGATTGACAGAGGTACGAGGCTTTAATGACCCTCAGAAAGAGGAATACTTCAGGAAGAAGATCAGAGATCAGAGTCTGGCTAACAAAATCATCTCACACCTGAAGT
13:2704297-2706084_744	TTCAGGAAGAAGATCAGAGATCAGAGTCTGGCTAACAAAATCATCTCACACCTGAAGTCCACCAGGAGTCTCTTCATCATGTGCCACATCCCAGTGTTCTGCTGGATCTCAGCAAGTGTT
13:2704297-2706084_806	CAGGAGTCTCTTCATCATGTGCCACATCCCAGTGTTCTGCTGGATCTCAGCAAGTGTTTTGGAACAGATGATGAGATCACGTAAAGGAGAGATTCCCAGGACTCTCACTGAAATGTACAC
13:2704297-2706084_868	AACAGATGATGAGATCACGTAAAGGAGAGATTCCCAGGACTCTCACTGAAATGTACACGCAGTTCTTGATCATTCAGACCAACATCAAACATAAGAAGCACTATGAGAAGACTGTGGAGG
13:2704297-2706084_930	TTCTTGATCATTCAGACCAACATCAAACATAAGAAGCACTATGAGAAGACTGTGGAGGACGAAGAGATAATCCTCAAACTGGGGAAACTGGCCTTTCTGCAGCTTGTGAAAGGCAACCTG
13:2704297-2706084_992	AGAGATAATCCTCAAACTGGGGAAACTGGCCTTTCTGCAGCTTGTGAAAGGCAACCTGATCTTCTATGAGGAGGACCTGAGAGAGTGTGGCATTGATGTGGCAGAAGCCTCGGTTTACTC
13:2704297-2706084_1054	TCTATGAGGAGGACCTGAGAGAGTGTGGCATTGATGTGGCAGAAGCCTCGGTTTACTCAGGACTGTGCACTCAGATCTTCAGAGAGGAGCTGGGCTGGTATCAGGGAAGAGTTTTCTGCT
13:2704297-2706084_1116	CTGTGCACTCAGATCTTCAGAGAGGAGCTGGGCTGGTATCAGGGAAGAGTTTTCTGCTTTGTTCATCTCAGCATTCAGGAGCATCTCGCAGCTCTACATGTGCTGCTTTCATTCTCGCTG
13:2704297-2706084_1178	TCATCTCAGCATTCAGGAGCATCTCGCAGCTCTACATGTGCTGCTTTCATTCTCGCTGTACAAGAGGGATGTGCTTAATGAAAACCTCAGATCAACACATGCACGTAAATTCACATGTCA
13:2704297-2706084_1240	AGAGGGATGTGCTTAATGAAAACCTCAGATCAACACATGCACGTAAATTCACATGTCACACAATATCTGACCTGCACCAGAGAGCCGTGGACAAAGCTCTGCAGAGTAAAAATGGACATC
13:2704297-2706084_1302	ATATCTGACCTGCACCAGAGAGCCGTGGACAAAGCTCTGCAGAGTAAAAATGGACATCTGGACCTTTTCCTCAGATTTCTTCTGGGTCTTTCACTAGAGTCCAATCAGATGCTCCTGAAA
13:2704297-2706084_1364	CCTTTTCCTCAGATTTCTTCTGGGTCTTTCACTAGAGTCCAATCAGATGCTCCTGAAAGGTCTTCTGACAAATCTTGGAAACATCTCATTCAGTGAAGAGAAATCAACAGAGTACATTAA
13:2704297-2706084_1426	TTCTGACAAATCTTGGAAACATCTCATTCAGTGAAGAGAAATCAACAGAGTACATTAAAACAAGAATAAGAATGAATCCCTCACCGGAAAAATCCATCAATCTGTTCCACTGTTTAAATG
13:2704297-2706084_1488	AGAATAAGAATGAATCCCTCACCGGAAAAATCCATCAATCTGTTCCACTGTTTAAATGAACTCGGTGATCCTTCTCTTGTGAAGGAAGTCCAGCAGTATGTTAGATCTGGATGTCTTTTA
13:2704297-2706084_1550	CGGTGATCCTTCTCTTGTGAAGGAAGTCCAGCAGTATGTTAGATCTGGATGTCTTTTAAACACCAGATTGTCCTCCTCGCAGTGGTCTGCTGTTGTTTTTGTTTTGGTGAACTCTGAGCA
13:2704297-2706084_1612	CCAGATTGTCCTCCTCGCAGTGGTCTGCTGTTGTTTTTGTTTTGGTGAACTCTGAGCAGCTGGATTCTTTTGATTTGAGCAAATATATAAGCAGAGAAAAACATGAAAACGTCATGACAC
13:2704297-2706084_1667	GCAGCTGGATTCTTTTGATTTGAGCAAATATATAAGCAGAGAAAAACATGAAAACGTCATGACACCTGATGAAGTTCTTCAGAAGCTCGTGCCCGTAGTTGAAGCCTCTAGATCGGCTAG
13:18383615-18386695_0	ATTAAACTGAAGGATTTTACATGTCACATGTGAATCACCAGAACCGCAAGCTAACTTGTTTTATTAAAATTTTGATCGAATTTCCCCTTTATTTTAAATGATGGTATTGGTTCCTCATTT
13:18383615-18386695_62	ATTAAAATTTTGATCGAATTTCCCCTTTATTTTAAATGATGGTATTGGTTCCTCATTTGCTCCTCATGTGACCTCAAACATAGTTGGCTACATTTCTTTCATCAGAAAAGTTGTGAGTCT
13:18383615-18386695_124	CTCATGTGACCTCAAACATAGTTGGCTACATTTCTTTCATCAGAAAAGTTGTGAGTCTTGATGGCAGCTCTTAAGATGGGTTTCTATGCTATAAGTGTGTTTTTGATATGTTACTACATA
13:18383615-18386695_186	GGCAGCTCTTAAGATGGGTTTCTATGCTATAAGTGTGTTTTTGATATGTTACTACATAGCTAATGGAGAGCCATGCACTCGAGTAAGTTTTCTGGTTTAAAATGTATTTTGTCTTACTGT
13:18383615-18386695_248	ATGGAGAGCCATGCACTCGAGTAAGTTTTCTGGTTTAAAATGTATTTTGTCTTACTGTTTTATTTACTGTTTTTAAATGATTGGTTTACCTTAGATTATTGAGAATCTTCATTACTCATG
13:18383615-18386695_310	TTTACTGTTTTTAAATGATTGGTTTACCTTAGATTATTGAGAATCTTCATTACTCATGCATGGGAAGAAACCTCAGCAGCATCCCATCCAGTATCCCTTCCTCGGTTCAAACTCTGGACT
13:18383615-18386695_372	GGAAGAAACCTCAGCAGCATCCCATCCAGTATCCCTTCCTCGGTTCAAACTCTGGACTTCAGTTTTAATTTTTTTCCACAATTAAAGAAGACTATTTTCCCAGTTCTGTCTTTTCTGCGA
13:18383615-18386695_434	TTTTAATTTTTTTCCACAATTAAAGAAGACTATTTTCCCAGTTCTGTCTTTTCTGCGAGTTCTTGATCTGTCAAGGTAAGTAATGCCATTACTTTCAAGATTTCCGTTGAGGTATTTTCT
13:18383615-18386695_496	TTGATCTGTCAAGGTAAGTAATGCCATTACTTTCAAGATTTCCGTTGAGGTATTTTCTATAAATAATGTTGAATGTTTTTTATTTAAATTTCAGATGCCACATCAGACAGATTGAAAACG
13:18383615-18386695_558	ATAATGTTGAATGTTTTTTATTTAAATTTCAGATGCCACATCAGACAGATTGAAAACGATGCTTTCTACAATGTGAAGAATTTGACTACTTTGTTTCTTACTGGAAACCCCATTATATAT
13:18383615-18386695_620	TTTCTACAATGTGAAGAATTTGACTACTTTGTTTCTTACTGGAAACCCCATTATATATTTTGCTCCTGGATGCTTGAATACTTTATATAATCTGCAAAGGCTTGTTCTTGTGGATATTGG
13:18383615-18386695_682	CTCCTGGATGCTTGAATACTTTATATAATCTGCAAAGGCTTGTTCTTGTGGATATTGGTCTTGAATCCTTACAGCTTAATATTAATAACCTTACCAAGCTACAGGAACTCAATGTTGGAA
13:18383615-18386695_744	GAATCCTTACAGCTTAATATTAATAACCTTACCAAGCTACAGGAACTCAATGTTGGAACAAATTACATCCAGTCTATGACTCTTCCTCCATTCATGACCACCTTCAAAAACTTCAGTTTA
13:18383615-18386695_806	TTACATCCAGTCTATGACTCTTCCTCCATTCATGACCACCTTCAAAAACTTCAGTTTACTTGATCTGCATGCCAACAATATATCCATCATCAGAACTAATCACACCGTTGTGCTGCGAGA
13:18383615-18386695_868	ATCTGCATGCCAACAATATATCCATCATCAGAACTAATCACACCGTTGTGCTGCGAGAGATCGGAAGAAACATGACGTTGATTCTGACTTGGAATCCATTACTACACATTGAACCAGGAG
13:18383615-18386695_930	GGAAGAAACATGACGTTGATTCTGACTTGGAATCCATTACTACACATTGAACCAGGAGCTTTCAAAGATGTTTATCTCAGACAGCTGGATATTCGATCTGCTTTTGTTTCATTTTCTGCT
13:18383615-18386695_992	CAAAGATGTTTATCTCAGACAGCTGGATATTCGATCTGCTTTTGTTTCATTTTCTGCTCAAAAAGCAGCTCTAAAAGCCCTGCATGGTCTTAATGTCAAAAGGTTAATTTTTGGAAAGTA
13:18383615-18386695_1054	AAGCAGCTCTAAAAGCCCTGCATGGTCTTAATGTCAAAAGGTTAATTTTTGGAAAGTACAGGGAAGATAACGGCTTTCATTTCGTGGACAATGATGTTTTAGATGGCCTTTGCTGTTTTA
13:18383615-18386695_1116	GAAGATAACGGCTTTCATTTCGTGGACAATGATGTTTTAGATGGCCTTTGCTGTTTTAATTTTCAGGAGGTATCTTACTATGTTTTGGAAAGTGCTAAAACAACAATTGCTATCTTTCGC
13:18383615-18386695_1178	TCAGGAGGTATCTTACTATGTTTTGGAAAGTGCTAAAACAACAATTGCTATCTTTCGCTGTATGATCAATGCAACACGTATAACAGTAAAAGGAGGTAATATTTATGAAATGGAGACTGT
13:18383615-18386695_1240	TGATCAATGCAACACGTATAACAGTAAAAGGAGGTAATATTTATGAAATGGAGACTGTGCATTTTCATAAAACCAAGGAGCTTTATTTGATCAACAATGGCTTGGGTACTTTGCCAACTA
13:18383615-18386695_1302	TTTCATAAAACCAAGGAGCTTTATTTGATCAACAATGGCTTGGGTACTTTGCCAACTAAACAACTTTCACATCTCCATACATTAGAAAAACTGGAAATTACACACAACAGTGAACCTATT
13:18383615-18386695_1364	ACTTTCACATCTCCATACATTAGAAAAACTGGAAATTACACACAACAGTGAACCTATTTTTGCAGAGCCCTTCACAGACCTGCCTAAACTGCAGTATGTAGATTTAAGTGACAACCAATT
13:18383615-18386695_1426	CAGAGCCCTTCACAGACCTGCCTAAACTGCAGTATGTAGATTTAAGTGACAACCAATTGAAAATAAAACATTGCTGCTCTACACTTTTATCCGGCACTCCTCAAATCAACTATTTGAATT
13:18383615-18386695_1488	ATAAAACATTGCTGCTCTACACTTTTATCCGGCACTCCTCAAATCAACTATTTGAATTTGAGCCTAAACTCAGAAATTTCTGTTGATGTGGGAGGATTTGAAGGACTTGATTCGCTTGAG
13:18383615-18386695_1550	CCTAAACTCAGAAATTTCTGTTGATGTGGGAGGATTTGAAGGACTTGATTCGCTTGAGATTCTAGATTTTTCCTATACAAGGGTTGTACGCATTGGATACCTTTCTGTTTTATCCAACCT
13:18383615-18386695_1612	TAGATTTTTCCTATACAAGGGTTGTACGCATTGGATACCTTTCTGTTTTATCCAACCTAAAGAATCTGAGGTATCTGGATGTTTCCTATTCAAGTGTAACATTTAGTAACATATTTTGCT
13:18383615-18386695_1674	AATCTGAGGTATCTGGATGTTTCCTATTCAAGTGTAACATTTAGTAACATATTTTGCTTTCTTGGACTCAGCAGTCTTAATGTTCTCAAAATGGCTGGTAATAATTTTCAAGGTAATGTA
13:18383615-18386695_1736	TGGACTCAGCAGTCTTAATGTTCTCAAAATGGCTGGTAATAATTTTCAAGGTAATGTAGCAAAATATGTATTTAATAATCTCACGTTATTGGAGCACCTTGACATGTCATTCTGTCATTT
13:18383615-18386695_1798	AATATGTATTTAATAATCTCACGTTATTGGAGCACCTTGACATGTCATTCTGTCATTTGGTAGAGTTACACACAAGCTCTTTTAAATATCTTCAGAGGCTTAGACATTTGAATGTGAAAG
13:18383615-18386695_1860	GAGTTACACACAAGCTCTTTTAAATATCTTCAGAGGCTTAGACATTTGAATGTGAAAGGAAACTATTTAATTAAGATAGATTTTCTGACTCACCCAAATCTGAAACAGTTAACTTCATTT
13:18383615-18386695_1922	CTATTTAATTAAGATAGATTTTCTGACTCACCCAAATCTGAAACAGTTAACTTCATTTTATGTTGAGAAAAACAGCATTACTGCCATTCCACTTCATGTTCTCAAAAATTTGCCCATGAA
13:18383615-18386695_1984	TTGAGAAAAACAGCATTACTGCCATTCCACTTCATGTTCTCAAAAATTTGCCCATGAACCTTTCAGAGTTTGATTTGTCTTTTAACCCAATTGATTGCTCCTGCTCTCAGACTGATTTTA
13:18383615-18386695_2046	TCAGAGTTTGATTTGTCTTTTAACCCAATTGATTGCTCCTGCTCTCAGACTGATTTTATGTTGTGGATTATCAATAATCAGAAAGTTTTGAAGCAGCCAGAAAATATTTTGTGCAAAACT
13:18383615-18386695_2108	GTGGATTATCAATAATCAGAAAGTTTTGAAGCAGCCAGAAAATATTTTGTGCAAAACTATTTCACCAAACTCAGATTTTAGAGTAACAGACTTTGACATTGACCACTGTGTCTACAAGAA
13:18383615-18386695_2170	CACCAAACTCAGATTTTAGAGTAACAGACTTTGACATTGACCACTGTGTCTACAAGAAAAAACTCATAATTGTTTTACCAGTATTTTGTGTAGTGTTTATAGTTGTGTTATCAATCTTGG
13:18383615-18386695_2232	CTCATAATTGTTTTACCAGTATTTTGTGTAGTGTTTATAGTTGTGTTATCAATCTTGGTTTACAGGTTTCAATTTTATTTGCGTTATTGTTGGATTTTACTAAGAGGCTACAGATCACCT
13:18383615-18386695_2294	CAGGTTTCAATTTTATTTGCGTTATTGTTGGATTTTACTAAGAGGCTACAGATCACCTGGACAGCAAGAATGTTCTTATGACGCATTTGTGATATTCTCCAGCTATGATGAAGCTTGGGT
13:18383615-18386695_2356	AGCAAGAATGTTCTTATGACGCATTTGTGATATTCTCCAGCTATGATGAAGCTTGGGTCATGAATGAACTGATGGAGAATTTGGAGAACGGTGTGCCACCTATTCAGCTTTGCCTTCACA
13:18383615-18386695_2418	AATGAACTGATGGAGAATTTGGAGAACGGTGTGCCACCTATTCAGCTTTGCCTTCACATGCGGGACTTTCAAGCCGGGAAGTCAATCGCCTCCAACATTATAGATGAAGGAATAATGGGC
13:18383615-18386695_2480	GGACTTTCAAGCCGGGAAGTCAATCGCCTCCAACATTATAGATGAAGGAATAATGGGCAGCCGTAAGATCATTGTGGTCGTGTCTCAACACTTCATTGATAGTGCCTGGTGTCGCTTTGA
13:18383615-18386695_2542	GTAAGATCATTGTGGTCGTGTCTCAACACTTCATTGATAGTGCCTGGTGTCGCTTTGAGTTTGAATTAGCTCAGTCTCGGTTTTTGATGGAACGCAATGCCAACATCATCATCATTATTC
13:18383615-18386695_2604	GAATTAGCTCAGTCTCGGTTTTTGATGGAACGCAATGCCAACATCATCATCATTATTCTGGAAGATGTTGCGGAGAGGAAAACTAAGAAAATACTAGGTCTTCATAAGCATCTGAAGAAG
13:18383615-18386695_2666	AGATGTTGCGGAGAGGAAAACTAAGAAAATACTAGGTCTTCATAAGCATCTGAAGAAGAACACTTACCTGAAGTGGAGCAGAGACCCTTTGAGCAACATGAGATTCTGGATACGACTCAG
13:18383615-18386695_2728	CTTACCTGAAGTGGAGCAGAGACCCTTTGAGCAACATGAGATTCTGGATACGACTCAGGAAAGCAATTGTTGCTACAAAACAATGATATAGTTTAGGCCACAAATAGTTTGCATGTCTTA
13:18383615-18386695_2790	GCAATTGTTGCTACAAAACAATGATATAGTTTAGGCCACAAATAGTTTGCATGTCTTACTTGAATAGTTTATCAGCATACAATGCAACAACAGTATTAATACCTTTGGTCTGATAATTTA
13:18383615-18386695_2852	AATAGTTTATCAGCATACAATGCAACAACAGTATTAATACCTTTGGTCTGATAATTTATGCATATTTTGATTGAATAAAGTGATGCCTTAATTTTGCGTTTTGCATTCACAGAAAAAAAA
13:18383615-18386695_2914	TATTTTGATTGAATAAAGTGATGCCTTAATTTTGCGTTTTGCATTCACAGAAAAAAAAAAATTTCTGTCATAATCAACATATTCATTTGACAACACAGTTATTGTTTGTAAATTGCCTGA
13:18383615-18386695_2960	ACAGAAAAAAAAAAATTTCTGTCATAATCAACATATTCATTTGACAACACAGTTATTGTTTGTAAATTGCCTGATGTAAACAGCATACTTCGTTTTTTAAATATTTTATTATGATGCCTG
13:18389746-18392386_0	GAACAGTTGAGATCACACAAGATGAATTTCTTTACTATAAGTGCTTTCATAATATATTTTCCAATAGGTGCTGGACAATCATGCACAGAAGTAAGTTTCTAAATTTAAATACATTTTTTC
13:18389746-18392386_62	AATAGGTGCTGGACAATCATGCACAGAAGTAAGTTTCTAAATTTAAATACATTTTTTCAATACTTATATAAAATTATTTGTTTATATAAATACATTTTTTTTTTAAATTTTAGATTATTG
13:18389746-18392386_124	CTTATATAAAATTATTTGTTTATATAAATACATTTTTTTTTTAAATTTTAGATTATTGAAAATCTTCATTATTCATGCATGGGAAGAAACCTAAGCTACATACCATCCAGAATTCCTTCC
13:18389746-18392386_186	TCTTCATTATTCATGCATGGGAAGAAACCTAAGCTACATACCATCCAGAATTCCTTCCTCAGTTCAAACTCTTGATTTTAGTTTTAATGACCTGAAATGGTTAAAGAAAACTGTATTCCC
13:18389746-18392386_248	TTCAAACTCTTGATTTTAGTTTTAATGACCTGAAATGGTTAAAGAAAACTGTATTCCCAGTTTTCACTTTTCTGAGAGTTCTTGATCTGTCAAGGTAAGCACATTTGTGTTTCCGTCTCA
13:18389746-18392386_310	TTCACTTTTCTGAGAGTTCTTGATCTGTCAAGGTAAGCACATTTGTGTTTCCGTCTCAGTTGTTTTCAGTTGGTATTGTCTATAAATAATGTTAAATACATATATTTCTATTCAGATGCC
13:18389746-18392386_372	TTTTCAGTTGGTATTGTCTATAAATAATGTTAAATACATATATTTCTATTCAGATGCCACATCAGACAGATTGAAAACGATGCTTTCTACAATGTGAAGAATTTGACTACTTTGTTCCTT
13:18389746-18392386_434	CAGACAGATTGAAAACGATGCTTTCTACAATGTGAAGAATTTGACTACTTTGTTCCTTACTGGAAACCCTATTATATATTTTGCTCCTGGATGCTTGAATACTTTATATAATCTGCAAAG
13:18389746-18392386_496	GAAACCCTATTATATATTTTGCTCCTGGATGCTTGAATACTTTATATAATCTGCAAAGGCTAGTTCTTGTGGATATTGGTCTTGAATCCTTACAGCTTAATATTAATAACCTTACCAAGC
13:18389746-18392386_558	GTTCTTGTGGATATTGGTCTTGAATCCTTACAGCTTAATATTAATAACCTTACCAAGCTACAGGAACTCAATGTTGGAACAAATTACATCCAGTCTATGACTCTTCCTCCATTCATGAGC
13:18389746-18392386_620	GGAACTCAATGTTGGAACAAATTACATCCAGTCTATGACTCTTCCTCCATTCATGAGCACCTTCAAAGACTTCAGTTTACTTGATCTACATGCCAACAATATATCCATCATCAGAACTAA
13:18389746-18392386_682	TCAAAGACTTCAGTTTACTTGATCTACATGCCAACAATATATCCATCATCAGAACTAATCACACCGTTGTGCTTCGAGAGATTGGAAAAAACATGACATTGATTCTCTCTAGGAATCCAT
13:18389746-18392386_744	ACCGTTGTGCTTCGAGAGATTGGAAAAAACATGACATTGATTCTCTCTAGGAATCCATTACTACACATTGAACCAGGGTCTTTTAAAGGGGTTCATCTTGTAGAGCTGGACATCCGATCC
13:18389746-18392386_806	ACACATTGAACCAGGGTCTTTTAAAGGGGTTCATCTTGTAGAGCTGGACATCCGATCCACATTTGTTTCGTTTGCTTCAAAGAAACAGGGTCTAAATGGTCTGCATGGCCTTAATGTCAC
13:18389746-18392386_868	TTGTTTCGTTTGCTTCAAAGAAACAGGGTCTAAATGGTCTGCATGGCCTTAATGTCACAAGGCTGATGTTTGGAATGTATAAAGATGATCCCAAACTTTACCCATCAGATCTAGACTATT
13:18389746-18392386_930	CTGATGTTTGGAATGTATAAAGATGATCCCAAACTTTACCCATCAGATCTAGACTATTTCGATGGTCTTTGCTCTATTCATTTTTATGAGGCATATTATTACATGAAGGAAAGACTTGAC
13:18389746-18392386_992	TGGTCTTTGCTCTATTCATTTTTATGAGGCATATTATTACATGAAGGAAAGACTTGACTGGAAAATGAATATCTTTCGCTGTATGATTAATGCCACAGTTGTAGTTGTTAAGGGTGGTGT
13:18389746-18392386_1054	AAATGAATATCTTTCGCTGTATGATTAATGCCACAGTTGTAGTTGTTAAGGGTGGTGTAATTCGTGTCATTGGGTATGTGCCTTTTCATAAAATCAAGGAGCTTTACTTGATTAACACTC
13:18389746-18392386_1116	CGTGTCATTGGGTATGTGCCTTTTCATAAAATCAAGGAGCTTTACTTGATTAACACTCAGTTATATACTGTGCCAGGTAAACAACTTTCACACATTCGTACTTTAGAAAAATTTGTATTT
13:18389746-18392386_1178	ATATACTGTGCCAGGTAAACAACTTTCACACATTCGTACTTTAGAAAAATTTGTATTTACACACAACAGTGCAACTCAAGTTGAAAAATTCTTAGACATGCCGAAACTTCAGTATGTGGA
13:18389746-18392386_1240	ACAACAGTGCAACTCAAGTTGAAAAATTCTTAGACATGCCGAAACTTCAGTATGTGGATCTTAATTCAAACCAAATTACTCTACAATCATGCTGCATAGATGTTTTATCTGGTACTCCTC
13:18389746-18392386_1302	AATTCAAACCAAATTACTCTACAATCATGCTGCATAGATGTTTTATCTGGTACTCCTCAAATCAGATATTTAAATTTGAGCTTAAATCCACAAATTTCTCTTGATAAAGGAGGATTTGAA
13:18389746-18392386_1364	CAGATATTTAAATTTGAGCTTAAATCCACAAATTTCTCTTGATAAAGGAGGATTTGAAGGACTTGAATCCCTAGAAATTTTAGATTTTCATCATACAAAGCTTTTAGGTATAGGATCTTT
13:18389746-18392386_1426	TTGAATCCCTAGAAATTTTAGATTTTCATCATACAAAGCTTTTAGGTATAGGATCTTTTACACTTTTGTCTAATTTAAAAAATCTGAGGTATCTGGATATTTCTTATTCAAGCGTAACCT
13:18389746-18392386_1488	CTTTTGTCTAATTTAAAAAATCTGAGGTATCTGGATATTTCTTATTCAAGCGTAACCTTTGTTAACGTATATTGCTTTTATGGACTGAGCAGTCTTAAAGTTCTCAAGATGGCTGGCAAT
13:18389746-18392386_1550	TAACGTATATTGCTTTTATGGACTGAGCAGTCTTAAAGTTCTCAAGATGGCTGGCAATAGTTTTCAAGGTGATGTAGCAAATTATTTATTTAACAATCTTACATTTTTAGAGCACCTTGA
13:18389746-18392386_1612	TTCAAGGTGATGTAGCAAATTATTTATTTAACAATCTTACATTTTTAGAGCACCTTGATATTTCATACTGTCATGTGATAGAAATACATTTAACGTCATTTAAAAACCTTCAAAGACTTA
13:18389746-18392386_1674	TCATACTGTCATGTGATAGAAATACATTTAACGTCATTTAAAAACCTTCAAAGACTTAGACATTTGAATCTCAGAGGAAACAATTTAATGAGTATAGATTTTCTCACCGACCCAAACCTT
13:18389746-18392386_1736	TTTGAATCTCAGAGGAAACAATTTAATGAGTATAGATTTTCTCACCGACCCAAACCTTAAACAATTAACAACATTTTATGTCAATAAAAACAGTATAACCACCATCCCACTTGACATTCT
13:18389746-18392386_1798	AATTAACAACATTTTATGTCAATAAAAACAGTATAACCACCATCCCACTTGACATTCTCCAAAAGTTGCCCATGAACCTTTCAGAGTTTGATTTGTCTTTTAACCCAATTGATTGCTCCT
13:18389746-18392386_1860	AAGTTGCCCATGAACCTTTCAGAGTTTGATTTGTCTTTTAACCCAATTGATTGCTCCTGCTCTCAGACTGATTTTATGTTGTGGATTATCAATAATCAGAGAGTTTTGAAACAGCCAGAA
13:18389746-18392386_1922	TCAGACTGATTTTATGTTGTGGATTATCAATAATCAGAGAGTTTTGAAACAGCCAGAAAATATTTTGTGCAAAACTATTTCACCAAACTCAGATTTTAGAGTAACAGACTTTGACATTGA
13:18389746-18392386_1984	TTTTGTGCAAAACTATTTCACCAAACTCAGATTTTAGAGTAACAGACTTTGACATTGACCACTGTGTCTACAAGAAAAAACTCATAATTGCTTTATTGGTATTCTGTGTAGTGTTTATAG
13:18389746-18392386_2046	TGTGTCTACAAGAAAAAACTCATAATTGCTTTATTGGTATTCTGTGTAGTGTTTATAGTTGTGTTATCAATCTTGGTTTACAGGTTTCAATTTTATTTGCGTTATTGTTGGATTTTACTA
13:18389746-18392386_2108	GTTATCAATCTTGGTTTACAGGTTTCAATTTTATTTGCGTTATTGTTGGATTTTACTAAGAGGCTACAGATCACCTGGACAGCAAGAATGTTCTTATGACGCATTTGTGATATTCTCCAG
13:18389746-18392386_2170	GCTACAGATCACCTGGACAGCAAGAATGTTCTTATGACGCATTTGTGATATTCTCCAGCTATGATGAAGCTTGGGTCATGAATGAACTTATGGAGAATCTGGAGAACGGTGTGCCACCTA
13:18389746-18392386_2232	GATGAAGCTTGGGTCATGAATGAACTTATGGAGAATCTGGAGAACGGTGTGCCACCTATTCAGCTTTGCCTTCACATGCGGGACTTTCAAGCCGGGAAGTCAATCGCCTCCAACATTATA
13:18389746-18392386_2294	GCTTTGCCTTCACATGCGGGACTTTCAAGCCGGGAAGTCAATCGCCTCCAACATTATAGATGAAGGAATAATGGGCAGCCGTAAGATCATTGTGGTCGTGTCTCAACACTTCATTGATAG
13:18389746-18392386_2356	AAGGAATAATGGGCAGCCGTAAGATCATTGTGGTCGTGTCTCAACACTTCATTGATAGTGCCTGGTGTCGTTTTGAGTTTGAATTAGCTCAGTCTCGGTTTGTGGTGGAACGCAATGCCA
13:18389746-18392386_2418	TGGTGTCGTTTTGAGTTTGAATTAGCTCAGTCTCGGTTTGTGGTGGAACGCAATGCCAATATCATCATCATTATTCTGGAAGATGTTGCGGAGAGGAAAACTAAGAAAGTGCTTGGTCTT
13:18389746-18392386_2480	CATCATCATTATTCTGGAAGATGTTGCGGAGAGGAAAACTAAGAAAGTGCTTGGTCTTCATAAGCATCTGAAGAAGAACACATACCTGAAGTGGAGCAGAGACCCTTTGAGCAACATGAG
13:18389746-18392386_2520	AAGAAAGTGCTTGGTCTTCATAAGCATCTGAAGAAGAACACATACCTGAAGTGGAGCAGAGACCCTTTGAGCAACATGAGATTCTGGATACGACTCAGGAAAGCAATTGTTGCTACATAG
13:18392669-18392944_0	TTTTAGATGAGAGCTTACTGCTTCACATCCACCGATGAGTGAGTTTGTTAAGTAATATTCCAGATGCCGTGATAAAAGAGCTGTTATCGTGTTAGTAAATTTGTATTTGAATTTGCTGAC
13:18392669-18392944_52	TAATATTCCAGATGCCGTGATAAAAGAGCTGTTATCGTGTTAGTAAATTTGTATTTGAATTTGCTGACAATTTTGTTTTGTTTTTTTAACGTTAAGTTTACCATATATCTTAACTTAAGT
13:18392669-18392944_104	ATTTGAATTTGCTGACAATTTTGTTTTGTTTTTTTAACGTTAAGTTTACCATATATCTTAACTTAAGTAAGATAATTTTGAACAATGATCATGTCAAATGGGGAACGGATGATTTTCCTA
13:18392669-18392944_155	TATATCTTAACTTAAGTAAGATAATTTTGAACAATGATCATGTCAAATGGGGAACGGATGATTTTCCTAAGTTCAATCTTTATTCTTGTGAATGCTGGACAAGGACAGGAATGTACCGAG
13:18395328-18397870_0	TGATAAAGAATAAGGAATATTCATGTTCTGGAAGGAATCTGACTTGTATTCCTGGTAGTCTTCCCTTCTCTGTGGCATCTCTGGATTTCAGTTTCAATTTCTTGACCTCATTACATAAGC
13:18395328-18397870_63	CCTTCTCTGTGGCATCTCTGGATTTCAGTTTCAATTTCTTGACCTCATTACATAAGCGTGTATTTCCTGTGATGTTGAATTTACAACTCCTGGATCTCACAAGGTAAATCAGTACTATTC
13:18395328-18397870_126	TTCCTGTGATGTTGAATTTACAACTCCTGGATCTCACAAGGTAAATCAGTACTATTCTTCAGTGTGTTACAATTTAAACATGATTGTGTTCTATGTTTTTATTTTTATGTTGTGTCCTTT
13:18395328-18397870_189	GTGTTACAATTTAAACATGATTGTGTTCTATGTTTTTATTTTTATGTTGTGTCCTTTCAGATGCTACATCAGACAGATTGAAAAAGATGCTTTCTACAATGTGAAAAATTTGATGACATT
13:18395328-18397870_252	CTACATCAGACAGATTGAAAAAGATGCTTTCTACAATGTGAAAAATTTGATGACATTGATTCTTACTGGAAACCCTATAACATATTTAGCACCTGAATGCTTGAATTCTTTATACAAGCT
13:18395328-18397870_315	TACTGGAAACCCTATAACATATTTAGCACCTGAATGCTTGAATTCTTTATACAAGCTGCAAAGACTAGTTCTTGTGGATGTTCGTCTTGAATCCTTACAACTTCAAATTAATAACCTTAC
13:18395328-18397870_378	ACTAGTTCTTGTGGATGTTCGTCTTGAATCCTTACAACTTCAAATTAATAACCTTACCAAGCTACAGGACCTTAAAGTCGGAACAAATTGCATCCAGTCCATGACTCTTCCTTCATTCAT
13:18395328-18397870_441	ACAGGACCTTAAAGTCGGAACAAATTGCATCCAGTCCATGACTCTTCCTTCATTCATGAGCACCTTCAAAGACTTCAGTTTACTTGATCTACATGCCAATAATATATCCATCATCAGAAT
13:18395328-18397870_504	CTTCAAAGACTTCAGTTTACTTGATCTACATGCCAATAATATATCCATCATCAGAATGGATCACACTGCTGTGTTGCGAGAGATTGGAAGAAATATGACGTTGATTCTGTCTAGGAATCC
13:18395328-18397870_567	CACTGCTGTGTTGCGAGAGATTGGAAGAAATATGACGTTGATTCTGTCTAGGAATCCATTAATACACATTGAACCAGGAGCTTTCAAGGATGTCATTCTCAGAGAGCTTCATCTGCTAGC
13:18395328-18397870_630	ACACATTGAACCAGGAGCTTTCAAGGATGTCATTCTCAGAGAGCTTCATCTGCTAGCTGCCTTCATTTCGTTTAATGCACAAAAAGAGTGTCACAAAGCTCTCACTGGCCTCACCGTGGA
13:18395328-18397870_693	CATTTCGTTTAATGCACAAAAAGAGTGTCACAAAGCTCTCACTGGCCTCACCGTGGATAAGTTGTTTGTGGGACGTTACAGAATGGACGAAAAAATCAAAGTGTCAGTTCCAGATTATCT
13:18395328-18397870_756	GTTTGTGGGACGTTACAGAATGGACGAAAAAATCAAAGTGTCAGTTCCAGATTATCTTGAAGGTCTATGTTCAATTAATTTTAACGAAATTTATCTTGTTCAAAAAGAATGGTCTGACTC
13:18395328-18397870_819	TCTATGTTCAATTAATTTTAACGAAATTTATCTTGTTCAAAAAGAATGGTCTGACTCAGAAATGCACTTGTTTCGTTGTATGGTCAATGCAACAAAAATCACAATAAAAAAAGCATATAT
13:18395328-18397870_882	GCACTTGTTTCGTTGTATGGTCAATGCAACAAAAATCACAATAAAAAAAGCATATATGAACAGTATGAAACATATTCCATTCCACCGTCTTAAGGAACTGTATTTAAGTGACACTGGATT
13:18395328-18397870_945	TATGAAACATATTCCATTCCACCGTCTTAAGGAACTGTATTTAAGTGACACTGGATTATCTGTTGTACCATTTATTTCACACATTCCAAGCTTGGAAAAACTGGTGATGAAGAGTCCCTT
13:18395328-18397870_1008	TGTACCATTTATTTCACACATTCCAAGCTTGGAAAAACTGGTGATGAAGAGTCCCTTTCCTATTACCTTCACTGGAGTCAGTGACCTTCCCCTGCTTCAATATGTAGACTTGAGTGGAAA
13:18395328-18397870_1071	TACCTTCACTGGAGTCAGTGACCTTCCCCTGCTTCAATATGTAGACTTGAGTGGAAACATGTTGATTTTGCATGAATGCTGTTCCATTCTTTTTCCAAGGACACCAAATATTCAATACTT
13:18395328-18397870_1134	GATTTTGCATGAATGCTGTTCCATTCTTTTTCCAAGGACACCAAATATTCAATACTTGAATCTTAGTCAAAACTCAGAAATAACATTTGTTAATGAGCCATTTTCTGCACTTGACTTGCT
13:18395328-18397870_1197	TAGTCAAAACTCAGAAATAACATTTGTTAATGAGCCATTTTCTGCACTTGACTTGCTTGAAGTGTTGGACTTCCACCATACAAAACTAGTCATAGTTTTTTACTTTGGATTCTTCAAACA
13:18395328-18397870_1260	GTTGGACTTCCACCATACAAAACTAGTCATAGTTTTTTACTTTGGATTCTTCAAACATCTGAGAAATTTAAAGTATTTGGATATTTCTTATACACGTGTTCATTTCAATACCTTGACTTT
13:18395328-18397870_1323	AAATTTAAAGTATTTGGATATTTCTTATACACGTGTTCATTTCAATACCTTGACTTTTCAGGACCTGCATAATTTGACTGTTCTTAAAATGGCAGGAAACAGTTTTAGTGGAGATAAATT
13:18395328-18397870_1386	CCTGCATAATTTGACTGTTCTTAAAATGGCAGGAAACAGTTTTAGTGGAGATAAATTGAGTTACTTCTTACAAAACCTAACAAGCTTGGAGGTTCTTGACATTTCACAGTGTGGCATTGA
13:18395328-18397870_1449	CTTCTTACAAAACCTAACAAGCTTGGAGGTTCTTGACATTTCACAGTGTGGCATTGAGAAAGTCTCCATGAGATCTTTTACTGGCACGCAGAAACTACGACATTTATATTTAAGTCGAAA
13:18395328-18397870_1512	CTCCATGAGATCTTTTACTGGCACGCAGAAACTACGACATTTATATTTAAGTCGAAACAAATTGATGGTTTTGGACTTTTTAACTCAACCAGAGCTGACACATCTTACATCAGTGTATAT
13:18395328-18397870_1575	GATGGTTTTGGACTTTTTAACTCAACCAGAGCTGACACATCTTACATCAGTGTATATTGATAAAAACAGTATAACCACCATCCCACTTGATGTTCTACAAAAGTTGCCCATGAACCTTTC
13:18395328-18397870_1638	AAACAGTATAACCACCATCCCACTTGATGTTCTACAAAAGTTGCCCATGAACCTTTCTGAGTTTGATTTGTCCTCTAACTCCATCGATTGCTCCTGCTCTCAGACTGATTTTATTTTGTG
13:18395328-18397870_1701	TGATTTGTCCTCTAACTCCATCGATTGCTCCTGCTCTCAGACTGATTTTATTTTGTGGATTATTCAAAAACAAAACATTTTAAAACAACTGGAAAACATTCGGTGTAAAACTTTTTCTGC
13:18395328-18397870_1764	TCAAAAACAAAACATTTTAAAACAACTGGAAAACATTCGGTGTAAAACTTTTTCTGCAAATACAGATTTCAAAGCAATAGACTTTGACATTGACTACTGTGTGCACAAGAAAAGACTCAC
13:18395328-18397870_1827	AGATTTCAAAGCAATAGACTTTGACATTGACTACTGTGTGCACAAGAAAAGACTCACAATTGTTTTATCAGTAATTTGTGTTACGTTTGTAGTTGTGTTAGCAATTTTGCTTTATAAATT
13:18395328-18397870_1890	TTTATCAGTAATTTGTGTTACGTTTGTAGTTGTGTTAGCAATTTTGCTTTATAAATTCTGGTTCTATGTTCAGTATTGTTTTATTTTATTCAGTGGCTACAGATCACCTGGACAGCAAGA
13:18395328-18397870_1953	CTATGTTCAGTATTGTTTTATTTTATTCAGTGGCTACAGATCACCTGGACAGCAAGAATGTTCTTATGACGCATTTGTGATTTTCTCCAGCTATGATGAAGCTTGGGTCATGAATGAACT
13:18395328-18397870_2016	TTATGACGCATTTGTGATTTTCTCCAGCTATGATGAAGCTTGGGTCATGAATGAACTTATGGAGAATCTGGAGAACGGTGTGCCACCTATTCAGCTTTGCCTTCACATGCGGGACTTTCA
13:18395328-18397870_2079	GAATCTGGAGAACGGTGTGCCACCTATTCAGCTTTGCCTTCACATGCGGGACTTTCAAGCCGGGAAGTCAATCGCCTCCAACATTATAGATGAAGGAATAATGGGCAGCCGTAAGATCAT
13:18395328-18397870_2142	GAAGTCAATCGCCTCCAACATTATAGATGAAGGAATAATGGGCAGCCGTAAGATCATTGTGGTTGTGTCTCAACACTTCATTGATAGTTCCTGGTGTCGCTTTGAGTTTGAATTAGCTCA
13:18395328-18397870_2205	TGTGTCTCAACACTTCATTGATAGTTCCTGGTGTCGCTTTGAGTTTGAATTAGCTCAGTCTCGGTTTTTGATGGAACGCAATGCCAATATCATCATCATTATTCTGGAAGATGTGGCGGA
13:18395328-18397870_2268	GTTTTTGATGGAACGCAATGCCAATATCATCATCATTATTCTGGAAGATGTGGCGGAGAGAAAAACCAAGAAAGTGTTTGGTCTACATAAGCATCTGAAGAAGAACACATACCTGAAGTG
13:18395328-18397870_2331	AACCAAGAAAGTGTTTGGTCTACATAAGCATCTGAAGAAGAACACATACCTGAAGTGGAGCAGAGACCCTTTGAGCAACATGAGATTCTGGATACGACTCAGGAAAGCAATTTTACAGAA
13:18395328-18397870_2394	AGACCCTTTGAGCAACATGAGATTCTGGATACGACTCAGGAAAGCAATTTTACAGAAATAATCAATGCACTAAACATGTTTTTTTTTTTTTTAACTGAATGTAATTTGGTCAAATAAAAC
13:18395328-18397870_2422	ATACGACTCAGGAAAGCAATTTTACAGAAATAATCAATGCACTAAACATGTTTTTTTTTTTTTTAACTGAATGTAATTTGGTCAAATAAAACAATGCATTGCACATTCTTCACATGACAA
13:18408630-18409136_0	TATCAATAGATCCTTTAACAGCCCATCCAAACCTGGTCCTGTCAGACAGAAACACTGTGGTGCAGATGAGCAATGAGCCCAGACCGTACCCAGATCATCCTGACCGCTTCGACTATTGGC
13:18408630-18409136_65	ATGAGCAATGAGCCCAGACCGTACCCAGATCATCCTGACCGCTTCGACTATTGGCAACAGGCACTGTGTAAGCCGGGTCTGGCAGGAGGACGATATTACTGGGAGCTGGACTGGAGAGGC
13:18408630-18409136_130	GTGTAAGCCGGGTCTGGCAGGAGGACGATATTACTGGGAGCTGGACTGGAGAGGCACTGAAGTGGACATTGCTGTCACCTACAAAGGGATCCAGAGGAAAGGAAATGACAAACCTGGCAG
13:18408630-18409136_195	ACATTGCTGTCACCTACAAAGGGATCCAGAGGAAAGGAAATGACAAACCTGGCAGCTTCGGAAGGAATGACAAGTCTTGGAGTTTGTACTGCTCTGAATCCGAATACTCGTTTATGCACA
13:18408630-18409136_260	AATGACAAGTCTTGGAGTTTGTACTGCTCTGAATCCGAATACTCGTTTATGCACAACAGCAAAAGCACGGCTGTATCTGTGCCCAGGTCCTCAAGGATTGGGGTTTATGTTGACTATGAG
13:18408630-18409136_325	CACGGCTGTATCTGTGCCCAGGTCCTCAAGGATTGGGGTTTATGTTGACTATGAGTCTGGGACACTGGCATTTTATAGTGTTTCTGACAAAATGACACTGCTGTACAAGGTGCAAACTAA
13:18408630-18409136_386	ACACTGGCATTTTATAGTGTTTCTGACAAAATGACACTGCTGTACAAGGTGCAAACTAAATTTACTGAGCCTCTTTACCCTGGCATTGGAGTTTGGGGATACGGGACAACAGTGCGACTG
13:19746559-19747047_0	TGGTCCTGGACCCTTCCACTGCTCATCCCAAGTTAATCGTTTCATCTAAAGGGGACTGCGCCACTTTCACAGATGAATGGCAGGACGTCCCGGAGCACGAGGGACGCTTCGACACCACTC
13:19746559-19747047_62	ACTTTCACAGATGAATGGCAGGACGTCCCGGAGCACGAGGGACGCTTCGACACCACTCTGAATGTCTTGAGCATCCAGTGCTGGAACTCTGGACACCATTATTGGGAGATTGATGTGAGT
13:19746559-19747047_124	TGTCTTGAGCATCCAGTGCTGGAACTCTGGACACCATTATTGGGAGATTGATGTGAGTGGGAAGATCTACTGGGAGCTGGGTCTCACTTATTCATCTATCCCAAGAAGAGGCCAAAAGGA
13:19746559-19747047_186	AGATCTACTGGGAGCTGGGTCTCACTTATTCATCTATCCCAAGAAGAGGCCAAAAGGAGAACTGCTGGTTGGGCCGCCATGCTGAATCTTGGTGTCTGGAGTATTTTGATGGAGACTACA
13:19746559-19747047_248	TGCTGGTTGGGCCGCCATGCTGAATCTTGGTGTCTGGAGTATTTTGATGGAGACTACAATGCATGGCATGGAGGTATATCTCATCCCTTGCCAATCTCTAAGTGTTTTAGTCGGATAGGG
13:19746559-19747047_310	ATGGCATGGAGGTATATCTCATCCCTTGCCAATCTCTAAGTGTTTTAGTCGGATAGGGATTTTCTGCAGCTTTCCTGGAGGTTTGGTGACATTTTTAGGGGTGGATAGTATGACACCGCT
13:19746559-19747047_368	ATTTTCTGCAGCTTTCCTGGAGGTTTGGTGACATTTTTAGGGGTGGATAGTATGACACCGCTATACTCATTCTGTGTTGGGACATTTACAGATGCTTTATACTTGGCTCTTTGTCCTGGT
13:22586916-22587607_0	AACAGAGCGATCAATTTGTGAACGGATCCAGGCGAATACAGCGTTGATTACATGCTCTGGATTCACTGGATAAACGATGTTTTGTTTATGGTCTTCAAACCTGTGAAAATTTATTAACAG
13:22586916-22587607_64	ACTGGATAAACGATGTTTTGTTTATGGTCTTCAAACCTGTGAAAATTTATTAACAGTGTTTAGTTGACTCGACGACTTGTAAAAACAACCCGACAACTAGTAAACAAGACGCAAGGTTAG
13:22586916-22587607_128	TGACTCGACGACTTGTAAAAACAACCCGACAACTAGTAAACAAGACGCAAGGTTAGTTTGATATGCAATCATGCCAAATATATATTTGCATTAGTACCGTAGATTTTTGTTGTAGAGCAT
13:22586916-22587607_192	GCAATCATGCCAAATATATATTTGCATTAGTACCGTAGATTTTTGTTGTAGAGCATGCCTCTTTTTAAACAGCATGAAAATAGTCTACTTTCTGTTTTGGAAATAAGGATTTAGTTTCTT
13:22586916-22587607_256	TTAAACAGCATGAAAATAGTCTACTTTCTGTTTTGGAAATAAGGATTTAGTTTCTTAGTGCATCTATTTTAAGCTTGTTTTGAAAACGTTACAATGCAGAGATGCTGTACAGTTCATATG
13:22586916-22587607_320	TATTTTAAGCTTGTTTTGAAAACGTTACAATGCAGAGATGCTGTACAGTTCATATGATGTCGAAGGTATAGCTAACGTTACAGTGATACTGCAAATGCATAATTAACAATTATACAACAA
13:22586916-22587607_384	GGTATAGCTAACGTTACAGTGATACTGCAAATGCATAATTAACAATTATACAACAATGGTTAGTAATATCAGTTATGTGTTTTGAGTACTGCACAAGATTTGTCCCATATGTTTTACTGC
13:22586916-22587607_448	AATATCAGTTATGTGTTTTGAGTACTGCACAAGATTTGTCCCATATGTTTTACTGCTGTTCGTGTTAGTCTGTGGGAAATTCCCATCAAAAGTCAGATGTACTTTTTGGATCTGACTTGC
13:22586916-22587607_512	TTAGTCTGTGGGAAATTCCCATCAAAAGTCAGATGTACTTTTTGGATCTGACTTGCAGGGGAATCACAACCCCATCATACAGCGTGTAATCACTCATCAGATCCATCTTTTTCGGTCTGA
13:22586916-22587607_571	GGAATCACAACCCCATCATACAGCGTGTAATCACTCATCAGATCCATCTTTTTCGGTCTGACAGGAGCCCAGGTTCGGTTCGGATGATCCTGGAGAGCACAGAATGGCTGGAGCACTAAG
13:22589339-22589720_0	AGCGAGCCAGAGAGAGGGAGGGAGACATAATGCACATATCCGAGAAAGTGAAACAAACTCAGTTTTTTTGAGCCCTTTGTGTAAAACCGAGAGCTTCTGTCTCTACATTTGTTTGTCAGA
13:22589339-22589720_66	TTTGAGCCCTTTGTGTAAAACCGAGAGCTTCTGTCTCTACATTTGTTTGTCAGACAGGGTAAGCGTCTGTCTTTTTCTGTGTAGGTCACATCACTGCCGTGGGGGAAAAACTGGGGAAAT
13:22589339-22589720_132	CTGTCTTTTTCTGTGTAGGTCACATCACTGCCGTGGGGGAAAAACTGGGGAAATGAAATGCATGTGTCGGGGTTTGCAGCTCAGTTGATGTTTTGATTCAGCACACTGACTATTTTAGCG
13:22589339-22589720_198	TCGGGGTTTGCAGCTCAGTTGATGTTTTGATTCAGCACACTGACTATTTTAGCGACGGGCCTTGTGGGTTTTTAGCAATTCTGGATTGGTGTCTGTGTGAGACAGTCTCAACAACAGTTT
13:22589339-22589720_261	GTGGGTTTTTAGCAATTCTGGATTGGTGTCTGTGTGAGACAGTCTCAACAACAGTTTTCTGTTTTTCCACATTACAGGATGGATGATACACATTATCAAATTGGATTTGTGGTCAATGAG
13:22591019-22591548_0	CTATGACGTTTCCTTCAGCCTATGACGATCTTCCATATATGCCTGAAGCTTTTGAGGTGAAGCATGAGCCCTTTGTGCAAGAGACAGGTAAGCTAACAACGTGCTTTATTAATGCTTTTT
13:22591019-22591548_59	AAGCATGAGCCCTTTGTGCAAGAGACAGGTAAGCTAACAACGTGCTTTATTAATGCTTTTTATGTCTTGCTTTGCGTTGTTCTTTTAATTTAATTGGAGAAAAGTCTTATTGCTAAGTGC
13:22591019-22591548_118	TTATGTCTTGCTTTGCGTTGTTCTTTTAATTTAATTGGAGAAAAGTCTTATTGCTAAGTGCTGTCTTTGTTTTTTCAGTTGATGGCCCTTACATACAGATAATTGAGGAGCCAAAGCAGG
13:22591019-22591548_177	GCTGTCTTTGTTTTTTCAGTTGATGGCCCTTACATACAGATAATTGAGGAGCCAAAGCAGGTGGGACCTTCCAAACTATCTTCAAATGTTAAAAGTGATCAAATAATGTACAGTACAAGT
13:22591019-22591548_236	GGTGGGACCTTCCAAACTATCTTCAAATGTTAAAAGTGATCAAATAATGTACAGTACAAGTCATTTTGTAAGCATGTGTCACTATATGTGCATATAATGTGGGATAATTCCAGAATGTAT
13:22591019-22591548_295	GTCATTTTGTAAGCATGTGTCACTATATGTGCATATAATGTGGGATAATTCCAGAATGTATGCAATGGAATTCCCCAAATAGAGTTTTTTTTATCAGTGAGGAAGGTGTTATGTAAATAA
13:22591019-22591548_354	ATGCAATGGAATTCCCCAAATAGAGTTTTTTTTATCAGTGAGGAAGGTGTTATGTAAATAACATTGTGTGTTTCAGAGAGGATTCAGATTTCGTTATGAATGTGAGGGCCCATCCCACGG
13:22591019-22591548_409	AAATAACATTGTGTGTTTCAGAGAGGATTCAGATTTCGTTATGAATGTGAGGGCCCATCCCACGGTGGCCTACCAGGGGCCTCCAGTGAAAGGAACAGGAGGACGTATCCCACTGTCAAG
13:22593110-22593761_0	TGTTAAACTTTGTGGGCAATGCTCGTGTGGAGGTTCAGCTGGTGACACACACAGACCCTCCACGAGTTCACGCACACAGCCTTGTGGGTCGACACTGTAATGAAAGCGGGGTCTGCAGTG
13:22593110-22593761_59	CCACGAGTTCACGCACACAGCCTTGTGGGTCGACACTGTAATGAAAGCGGGGTCTGCAGTGTTGATGTCGGGCCTAGTGATTTCACAGCACAGTGAGTGAACGCGATTACTGCTCGTATG
13:22593110-22593761_118	TGTTGATGTCGGGCCTAGTGATTTCACAGCACAGTGAGTGAACGCGATTACTGCTCGTATGATCTTTTTCCTTGTTATTATGATTAAGCTAGATTGTCTGTGCAACTTTGTCATGTGCTG
13:22593110-22593761_177	TGATCTTTTTCCTTGTTATTATGATTAAGCTAGATTGTCTGTGCAACTTTGTCATGTGCTGTTTGTGTGTTTATTGTGCAATCTGTGCCTAGATTCAGTAACTTAGGCATCCTGCATGTC
13:22593110-22593761_236	TGTTTGTGTGTTTATTGTGCAATCTGTGCCTAGATTCAGTAACTTAGGCATCCTGCATGTCACAAAGAGAGGAGTGGTAGAAGTCTTAACGAAAAGGCTGAAAGAAGAGAAGAGGAAGGT
13:22593110-22593761_295	TCACAAAGAGAGGAGTGGTAGAAGTCTTAACGAAAAGGCTGAAAGAAGAGAAGAGGAAGGTGAAAGGGCCTGGATATAAGTTTAGTGGTGAGAGTTATACTATATCGTATATATATATAT
13:22593110-22593761_354	GTGAAAGGGCCTGGATATAAGTTTAGTGGTGAGAGTTATACTATATCGTATATATATATATACGATAACTATTGAATTGTCTTTTTGCTGCTTGTGTCTTCTTCTGATGTAATGTTTCTT
13:22593110-22593761_413	ATACGATAACTATTGAATTGTCTTTTTGCTGCTTGTGTCTTCTTCTGATGTAATGTTTCTTGTTTTCTCACTCTTGCAGATGCAGAGGAAAATGCTCTTATGCAAGAAGCCAAAGAGTTA
13:22593110-22593761_472	TTGTTTTCTCACTCTTGCAGATGCAGAGGAAAATGCTCTTATGCAAGAAGCCAAAGAGTTAGGCAAAAACATGGATCTGAACATTGTACGTTTAAAGTTCACTGCCTACCTGCAGGACAG
13:22593110-22593761_531	TAGGCAAAAACATGGATCTGAACATTGTACGTTTAAAGTTCACTGCCTACCTGCAGGACAGCAATGGGAGTTACACCAGAGCATTGAAGCCTGTTGTGTCCAATCCTATATATGACAGCA
13:22594904-22595560_0	ATCACCAAACGCTTCCAATCTGAAGATCTCTCGTATGGATAAAACCTCTGGGTCAGTGCTGGGAGGAGAAGAGGTCTTTCTGCTCTGTGATAAAGTTCAAAAAGGTTATTAGCTTTTTTA
13:22594904-22595560_60	GGGAGGAGAAGAGGTCTTTCTGCTCTGTGATAAAGTTCAAAAAGGTTATTAGCTTTTTTATTGTGATTATGATCATTTTACTAAGATATTCTACAACAGTTTAGATCAAATGCTGTTTCT
13:22594904-22595560_120	TTGTGATTATGATCATTTTACTAAGATATTCTACAACAGTTTAGATCAAATGCTGTTTCTGCTCCTTTGTTCTCCAGATGATATTGACATCCGCTTTTATGAGGAGGAAGATGAATGGGA
13:22594904-22595560_180	GCTCCTTTGTTCTCCAGATGATATTGACATCCGCTTTTATGAGGAGGAAGATGAATGGGAGGCATTAGGAGACTTTTCCCCCACTGATGTCCACAAACAGGTGTGTTTTACAAATTAATG
13:22594904-22595560_240	GGCATTAGGAGACTTTTCCCCCACTGATGTCCACAAACAGGTGTGTTTTACAAATTAATGCATTTATTTTGGATTGAGTTTATATATATAAATATATATAGTAGTGAATGTTTAAAGTGG
13:22594904-22595560_300	CATTTATTTTGGATTGAGTTTATATATATAAATATATATAGTAGTGAATGTTTAAAGTGGATCAAACCCTTTTATCAAAGTCCTACTTAAACTATACAACGACACCCAATCTTGTCTTAG
13:22594904-22595560_420	GGCAATTTTGAAAAAGTTTTTTGATCCACATCAAATGTTGATTACTTTTAGATCCAACCTTTACTTAAACAGTGTTTTGTGTGTGTGTGTCTGTCAGTATGCGATCGTGTTTAAGACGCC
13:22594904-22595560_480	TTACTTAAACAGTGTTTTGTGTGTGTGTGTCTGTCAGTATGCGATCGTGTTTAAGACGCCTCCGTACCGCTGCACCAACATCGATCGACCTGTCACAGTGTTTCTGCAGCTTAAGAGAAA
13:22594904-22595560_536	CGCCTCCGTACCGCTGCACCAACATCGATCGACCTGTCACAGTGTTTCTGCAGCTTAAGAGAAAGAAGGGCGGCGACTGTAGCGAACCAAAGCAGTTCACATATGTCCCACACAATCAAG
13:22596832-22597231_0	CAAAGAAGAGGTTCAGAGGAAGAGGATGAAGGCTCTTCCAGATCATTATGGTGGCTGGCGTGGAGGACCCCAGGGTGGAGCAGGGGGGTTTGGAGGACCTGGATCTGGAACAGGAGGAGG
13:22596832-22597231_56	GGCGTGGAGGACCCCAGGGTGGAGCAGGGGGGTTTGGAGGACCTGGATCTGGAACAGGAGGAGGAGGAGGAATGGGAGGAGGTGAGACATTCCACAAACTCGAAGGCTATGCAGGTTTTC
13:22596832-22597231_112	GGAGGAGGAGGAGGAATGGGAGGAGGTGAGACATTCCACAAACTCGAAGGCTATGCAGGTTTTCAGTTCAATTCATTATTTTATCTTTCAGCAGTAGTGCTCATATATTTATCTTTTGAT
13:22596832-22597231_168	AGGTTTTCAGTTCAATTCATTATTTTATCTTTCAGCAGTAGTGCTCATATATTTATCTTTTGATGCCTGCAGGTTTCCCTTTTAATCCGATGGATAATTCAAGTTTTTTTGTTGGTGGAT
13:22596832-22597231_224	CTTTTGATGCCTGCAGGTTTCCCTTTTAATCCGATGGATAATTCAAGTTTTTTTGTTGGTGGATGTGGAGGATTTGGTGGGGGTGCACAAATGTCTGACTCCCCTCCTCAAACTGATGGA
13:22596832-22597231_279	TTGGTGGATGTGGAGGATTTGGTGGGGGTGCACAAATGTCTGACTCCCCTCCTCAAACTGATGGAGCAAACACACAGTCTCAGTCGAACTCACAAATACGACAACAGCTCATTCAGATTG
13:22597617-22598730_0	TCTACACAATCGTGCTAATTTGGCGGCAAAATGCAATGCTCGTGCTTTATTACAGTACAGCAGCACAGGTGATGCGCGCCCCCTGCTGGCGCTGCAGAGACATCTGTGTGGAGTGCAAGA
13:22597617-22598730_63	CACAGGTGATGCGCGCCCCCTGCTGGCGCTGCAGAGACATCTGTGTGGAGTGCAAGATGAGAACGGAGACACGTATGTCTTTTCCACATCTCTGCTTTTTAGCTTGTATATGCTCTCTGT
13:22597617-22598730_126	CGGAGACACGTATGTCTTTTCCACATCTCTGCTTTTTAGCTTGTATATGCTCTCTGTGATTTAATATCTTGATTTATATTAAAGTAAAGTTTGCTGTTTTGGATTAATTTATCTGCTAAA
13:22597617-22598730_189	ATATCTTGATTTATATTAAAGTAAAGTTTGCTGTTTTGGATTAATTTATCTGCTAAATGCATCTAAAGTCAATTGTTACAATATAGTGAGTTTAATTTGAATATACATTTGTACTTTAGT
13:22597617-22598730_252	TAAAGTCAATTGTTACAATATAGTGAGTTTAATTTGAATATACATTTGTACTTTAGTAATTAGAGTTTGTTTTAAACTATTATATTTAATTTCCAATAGGCCTCTTCACTTGGCCATTAT
13:22597617-22598730_315	AGTTTGTTTTAAACTATTATATTTAATTTCCAATAGGCCTCTTCACTTGGCCATTATTCACCAGAAAACTGTTGTGGCGGAACAGCTTATTAAGGCCTTGAACAGCAGCCCACAGCAGAA
13:22597617-22598730_378	GAAAACTGTTGTGGCGGAACAGCTTATTAAGGCCTTGAACAGCAGCCCACAGCAGAAGTTCTTTAACAAACTCAACAAGCTCAGTCAGGTAATTTACAATAAATATATTGTAGAAATACT
13:22597617-22598730_441	TAACAAACTCAACAAGCTCAGTCAGGTAATTTACAATAAATATATTGTAGAAATACTTTTAAAATGCATAATCTGATGATTTTATTTTATTATTCATATGTTATATATTCATGTAAATAC
13:22597617-22598730_504	ATGCATAATCTGATGATTTTATTTTATTATTCATATGTTATATATTCATGTAAATACATACATACATACATATATGTATGTAGCATTTTATTATTATTATTTTTTTTTACATTCTATTTT
13:22597617-22598730_567	ACATACATATATGTATGTAGCATTTTATTATTATTATTTTTTTTTACATTCTATTTTCTTTCATCTCCAGGCTCCTCTGCATCTGGCTGTGATCACCAAGCAACCCAAGTTAGTAGAGAT
13:22597617-22598730_630	TCTCCAGGCTCCTCTGCATCTGGCTGTGATCACCAAGCAACCCAAGTTAGTAGAGATGTTGATGAAATCGGGTGCAGACCCGAGTCTGCTGGACCGAGAGGGCCGGACAGTGCTTCACTT
13:22597617-22598730_693	GAAATCGGGTGCAGACCCGAGTCTGCTGGACCGAGAGGGCCGGACAGTGCTTCACTTGGCCGCACATACTGGTGATGATGTCATACTAAGACTGGTCCTGAGCCTGCTAGGAGAGCATCA
13:22597617-22598730_756	ACATACTGGTGATGATGTCATACTAAGACTGGTCCTGAGCCTGCTAGGAGAGCATCACTCCCATTTAATAAACAGTGCTGACTTCACAGGTGAGACGAGACACACACCTTCTGTTAAAAT
13:22597617-22598730_819	TTTAATAAACAGTGCTGACTTCACAGGTGAGACGAGACACACACCTTCTGTTAAAATGTCACTTATGGTTGCATGGAATTTTACAGCACATATTAAGTTTTTTTTTTTTTTTCACTGTTT
13:22597617-22598730_882	TATGGTTGCATGGAATTTTACAGCACATATTAAGTTTTTTTTTTTTTTTCACTGTTTACAGGTCAGTATCCAGTCCATCTCGCTGTGAAGAAAGATGGAGAGCGTTGTTTGCGATTGCTG
13:22597617-22598730_945	CAGTATCCAGTCCATCTCGCTGTGAAGAAAGATGGAGAGCGTTGTTTGCGATTGCTGGTAGAAGCAGGAGCAAAGATTAACATGCCAGAGCAGAAAAGTGGCTGCACTGCACTGCACCTG
13:22597617-22598730_993	CGATTGCTGGTAGAAGCAGGAGCAAAGATTAACATGCCAGAGCAGAAAAGTGGCTGCACTGCACTGCACCTGGCAGTGAGGGACAACCTGTTGAAACTGGCCTGTAATCTCATCACTGAG
13:22599150-22599400_0	TCAGTACACGGCTAATGTTCTCCTATATTTAGTACAGAAAACAGCCACCACCAATGTTTTGTTCTCAAAGTTAAATGTTTGTTCTGTTACAGCTGAAGGCTGATGTGAATGCCTGTACCT
13:22599150-22599400_65	CAAAGTTAAATGTTTGTTCTGTTACAGCTGAAGGCTGATGTGAATGCCTGTACCTACGGGGGCAACAGTCCTCTTCATTTAGCTGCCAGTCAGGGCTCTCCACATCTCTGCTCCATGCTG
13:22599150-22599400_130	CAGTCCTCTTCATTTAGCTGCCAGTCAGGGCTCTCCACATCTCTGCTCCATGCTGATCGCTGCAGGTATTTTACAAACTTCCTTTTTTTATGAATGTAATTCAAATATCAGATACTTCCA
13:22600441-22601069_0	TGCTGATAAACGCATAGAGAATGACGAGCCTCTTTTCCTGAGCTCGTCTTCCTCAGATGAAGATGAAGAGAGCGAGAAGAAGCTTTCAGAAGACATGGTTCAGCAAGTTCACTGCTTGTC
13:22600441-22601069_64	GAAGAGAGCGAGAAGAAGCTTTCAGAAGACATGGTTCAGCAAGTTCACTGCTTGTCGATATCATCCGAGAGAGGAGTGTTTAACCCACGGAAGAGACCTGCTGCTGGACACACTCCCTTT
13:22600441-22601069_128	CCGAGAGAGGAGTGTTTAACCCACGGAAGAGACCTGCTGCTGGACACACTCCCTTTGACCTGGCCAAATCCCAAAAGGTTTGCATTAACGTATTTATCATACAGTGGGCAGGTGGATGAC
13:22600441-22601069_192	CAAATCCCAAAAGGTTTGCATTAACGTATTTATCATACAGTGGGCAGGTGGATGACTAAATGCATGTCACAGGTTTAACCTTTAAATCTCTATCGTCTTCCATAGGTTAGAGATTTATTA
13:22600441-22601069_256	TGTCACAGGTTTAACCTTTAAATCTCTATCGTCTTCCATAGGTTAGAGATTTATTAGATGGCAGGAAAGGCCCCAAGCCCAATTCGCTCAGCCCTAAGAGGACCAAAATAAGCACAGAAG
13:22600441-22601069_320	GAAAGGCCCCAAGCCCAATTCGCTCAGCCCTAAGAGGACCAAAATAAGCACAGAAGAAGGTAATACACTCAGATAGCATTCTATATGTGCTCACATGCTCATGCTTCTAGCATATGTGGC
13:22600441-22601069_384	ACACTCAGATAGCATTCTATATGTGCTCACATGCTCATGCTTCTAGCATATGTGGCTGATATGGACTTGTCTTGCTGCAGTGAACCAGGATTTGGACAACGAGGTGCTGAGCAAGCTGTG
13:22600441-22601069_448	ACTTGTCTTGCTGCAGTGAACCAGGATTTGGACAACGAGGTGCTGAGCAAGCTGTGTGGGATTCTAATTCATGACGATGTACCTTGGAGGGAACTGGCTGAAAAACTGGGTATGCTGACA
13:22600441-22601069_508	ATTCTAATTCATGACGATGTACCTTGGAGGGAACTGGCTGAAAAACTGGGTATGCTGACACTCACCCATCTGTACCAGGACAGCGCTTCACCCTGTCAGAAGCTTCTTGAAAGCTATCAG
13:22602540-22603215_0	TGAGTGGTGGTCCTGTGGATGGCCTGGTGGAGGCGCTGCAGGCTCTGGGTGTGAGGGAAGGAGTGAGGCTGCTGAGAGATAGTCAACCCAGAGAAGACAAACAGAGCTCAGGTACACACA
13:22602540-22603215_62	GTGAGGCTGCTGAGAGATAGTCAACCCAGAGAAGACAAACAGAGCTCAGGTACACACACAAATCAACACATGTAACAAACTAAACACTTTAACACTTCTAAATCAGACAGATCTCTGTGC
13:22602540-22603215_124	TCAACACATGTAACAAACTAAACACTTTAACACTTCTAAATCAGACAGATCTCTGTGCACTCGAATATCGGAGCATATTGTTTCCTCAAGCCAAATCCATCTTATTGCTACCACCCTATA
13:22602540-22603215_186	GAATATCGGAGCATATTGTTTCCTCAAGCCAAATCCATCTTATTGCTACCACCCTATAATTGTGTACACACACACACACACACAATTGTCTTTAAGCCATACATTCATACAGAAACATCC
13:22602540-22603215_248	TGTACACACACACACACACACAATTGTCTTTAAGCCATACATTCATACAGAAACATCCTTAAGGCACAAAAGAAAACTTGTGCTGGTTTGTGCATCTTTTGTGGCTTTAATAAGAAGCAA
13:22602540-22603215_310	GGCACAAAAGAAAACTTGTGCTGGTTTGTGCATCTTTTGTGGCTTTAATAAGAAGCAAATTAAGTTCAGTTCTTTCAGTGAAGAAGCATACAGCAGTTTGATTTGTATATTGTATTCTAT
13:22602540-22603215_372	AGTTCAGTTCTTTCAGTGAAGAAGCATACAGCAGTTTGATTTGTATATTGTATTCTATTGCTTTTTTCATTATTTTGAGGACTTTGTTTTTACTTGGTTTTTACTTTGTACATTCTACCA
13:22602540-22603215_434	TTTTTCATTATTTTGAGGACTTTGTTTTTACTTGGTTTTTACTTTGTACATTCTACCATGGTATTGACCTTATTCTTCACGTACGAGTGAGCACAGCTATTGGAATTTTGTGGCTTGAGA
13:22602540-22603215_496	ATTGACCTTATTCTTCACGTACGAGTGAGCACAGCTATTGGAATTTTGTGGCTTGAGATTTGACTATAAGACTTTTCATGCACTTCTATTGATTTTTAGAGGTTAAAAAGAGCTCGATCT
13:22604491-22605097_0	CTCCACAGAGGACAGTGGCTTCGGCAGTCAGTCTATTGGAGAGGAGATGGCAAATCCTGCAGTGGGCAATCACTGATCATCAGTATCCATTCAATAAGGACAACTTAGCACTTTATTAGT
13:22604491-22605097_61	GTGGGCAATCACTGATCATCAGTATCCATTCAATAAGGACAACTTAGCACTTTATTAGTTTACTGGTTCTTCAGGTGCAAACCGTTGGACTGTACATCATCTCAAATAGGAAATGCAGCA
13:22604491-22605097_122	ACTGGTTCTTCAGGTGCAAACCGTTGGACTGTACATCATCTCAAATAGGAAATGCAGCACACCAGAGAAAGGATTAAAAAGAGCAGTTTTGAGGTCAAAATCTCTCAATGGTATTACATA
13:22604491-22605097_183	CCAGAGAAAGGATTAAAAAGAGCAGTTTTGAGGTCAAAATCTCTCAATGGTATTACATAACAATAAGACATGACAGGAATCGGTTGCTTTAAGATTCTCAAATCTCTGCGGTATGGAGTG
13:22604491-22605097_244	AATAAGACATGACAGGAATCGGTTGCTTTAAGATTCTCAAATCTCTGCGGTATGGAGTGAAGCTGCTTTTCTGCAGGCATTTCAGTGCTTGTATCTTATCCCCACATGAGCAACAAAACC
13:22604491-22605097_305	GCTGCTTTTCTGCAGGCATTTCAGTGCTTGTATCTTATCCCCACATGAGCAACAAAACCCATCTGACTTCACGGTAATTTAACAATAATGCGACTGTCGTTTTTTAGCACAGCTGTAACC
13:22604491-22605097_366	TCTGACTTCACGGTAATTTAACAATAATGCGACTGTCGTTTTTTAGCACAGCTGTAACCTTAACATGTTTGTAGAATGTACTGATATGAATAATTCTTGTCAGCTGTCGTTTGATATGAT
13:22604491-22605097_427	AACATGTTTGTAGAATGTACTGATATGAATAATTCTTGTCAGCTGTCGTTTGATATGATATGCAAACTTAAGAATATTTTCTGATACATCTAAAGACTTATGCTGTTTATTTATGTACAT
13:22604491-22605097_486	ATGCAAACTTAAGAATATTTTCTGATACATCTAAAGACTTATGCTGTTTATTTATGTACATTTTTATGTTGCAGTTGTGTGTTTCTTGGATGCAGAAATAAATAAGTTTGTTTTATTAAA
13:22684473-22684983_0	CATTTATGTCAATACAAGGATTAAAAACAGGATAAACTGGGGCCGAAAGTTCAACGCAGAATGAGTGGAGCAAATCCAAAGTATCTGCATCATAGAAAGACACGTCTCCTTTCTGGACAT
13:22684473-22684983_65	TGGAGCAAATCCAAAGTATCTGCATCATAGAAAGACACGTCTCCTTTCTGGACATCTACCCTAACTCCAAGTTTGTGGATGGTTTTCCTTACTGCCAGTGGCTTTTCATTTGTGTCCTGA
13:22684473-22684983_130	TCCAAGTTTGTGGATGGTTTTCCTTACTGCCAGTGGCTTTTCATTTGTGTCCTGACAAACGAGATATCTTCCGTTACCATGATAGATGTAGCAGAAAGCATTATTAAAGTCTCCACTGCA
13:22684473-22684983_195	ATCTTCCGTTACCATGATAGATGTAGCAGAAAGCATTATTAAAGTCTCCACTGCAGTGCTCTAACTCCTGATCTCCCGTGGCTGGCCCATATGACAGACCAATCAGCCAATAGGGTTTCC
13:22684473-22684983_260	TCCTGATCTCCCGTGGCTGGCCCATATGACAGACCAATCAGCCAATAGGGTTTCCTCCAAACAGCCACTTCCCAGTAGTGGAGGCCAGAGCAGAATCTCTCTTTGGCCCGTACGCTGTAC
13:22684473-22684983_325	CACTTCCCAGTAGTGGAGGCCAGAGCAGAATCTCTCTTTGGCCCGTACGCTGTACTGAGAGCAGATATTTGCTTTCTCTTTTCTCTTGGGGGTTGTTTTCTTATTCCAGTGAACCTCCAG
13:22684473-22684983_390	TATTTGCTTTCTCTTTTCTCTTGGGGGTTGTTTTCTTATTCCAGTGAACCTCCAGCTGGTCTCCTGAAACCTCCAACTCTGGGTGTGCAGTCTCTGGGTCTAAACTCACTGATCTGAGAC
13:25665061-25666324_0	TTTTTTTTTTTTTTTTTTTTTGTGGATCAGCACATTTTCTCTTGTCAGCAATCATTTCCATGATTTCTCATGGCATCTATAGGGTCAAATAGTGATGTACTGTAATCTCTTTTGATTGTC
13:25665061-25666324_64	TTCTCATGGCATCTATAGGGTCAAATAGTGATGTACTGTAATCTCTTTTGATTGTCCTGTCTGTATATCGTCATCTATCAGTGCGGTGTGAATCAGCATTTACAGTAATCCCTACACAAC
13:25665061-25666324_128	ATATCGTCATCTATCAGTGCGGTGTGAATCAGCATTTACAGTAATCCCTACACAACAAACCCTCCAGATCTTTAATCAAAAATACATTCAGTGAACATAAACCGTGGCCTACGCTTAAAG
13:25665061-25666324_192	CAGATCTTTAATCAAAAATACATTCAGTGAACATAAACCGTGGCCTACGCTTAAAGACCGAGAAAAATCTTCAACTCTATTCGGGAAAGTGCCAGGTGTAATGCTCAAGATGGCTCTCCT
13:25665061-25666324_256	AAATCTTCAACTCTATTCGGGAAAGTGCCAGGTGTAATGCTCAAGATGGCTCTCCTGCCCCATATTTCCAGAAGGATACTGTATCTGCGAGACCCTCTGATTGGCGCCATTGGGGTCTAT
13:25665061-25666324_320	TTTCCAGAAGGATACTGTATCTGCGAGACCCTCTGATTGGCGCCATTGGGGTCTATTTGTCTCATGTGTTCTGGAGTACTTCCATTGTTGCAGTTTAGGAGGGCTGTGAAGGACTGTACA
13:25665061-25666324_384	TGTGTTCTGGAGTACTTCCATTGTTGCAGTTTAGGAGGGCTGTGAAGGACTGTACACAATCCGAGTTGACCAATGGAGCCATGTTGCTCAGCCCTTGAGGTTCCTGTTTCAACTGGATGC
13:25665061-25666324_448	GTTGACCAATGGAGCCATGTTGCTCAGCCCTTGAGGTTCCTGTTTCAACTGGATGCCTGGTTGATGATTACCCATGAGACTTTGCAAGATATCATCCTCTAAGCCGCTTGTAAACTGGTA
13:25665061-25666324_512	TGATTACCCATGAGACTTTGCAAGATATCATCCTCTAAGCCGCTTGTAAACTGGTAGCCCGTTGCTAGTGACCCACTAGCGCCTGATGCTCCATTTTGTGTGTTTTGAGGCTGTTGGGAG
13:25665061-25666324_576	CTAGTGACCCACTAGCGCCTGATGCTCCATTTTGTGTGTTTTGAGGCTGTTGGGAGCTGTAGTTATACCAGGCTCCTTCCTGTCCTTGTCTTTGTGGTGGCTGTTGGGATTGCTGAACCT
13:25665061-25666324_640	ATACCAGGCTCCTTCCTGTCCTTGTCTTTGTGGTGGCTGTTGGGATTGCTGAACCTGCTGGTTTAGTAGGTCCTGTCGAGGCTGGTTGCCGGTTGGTCCGTTGGGTTGAAGAATCTCCAG
13:25665061-25666324_704	AGTAGGTCCTGTCGAGGCTGGTTGCCGGTTGGTCCGTTGGGTTGAAGAATCTCCAGATCCATCGAGGTCAACAGAGGAAGGCTGTTTCCATTTTCCCCTGCACTTGGCATGTTGGGACTT
13:25665061-25666324_768	AGGTCAACAGAGGAAGGCTGTTTCCATTTTCCCCTGCACTTGGCATGTTGGGACTTGGGTTCACCTGCTGTAGACTTACAACATTATTGGGCACAGAAGTGTTGGTGACTTGACTGGTCC
13:25665061-25666324_832	CTGCTGTAGACTTACAACATTATTGGGCACAGAAGTGTTGGTGACTTGACTGGTCCACTGGCTTAGAGCTCCTTGTGTCGTGGTTTCTGATGGATGTGGCATCATAGGGCAGGACCGAAG
13:25665061-25666324_896	AGAGCTCCTTGTGTCGTGGTTTCTGATGGATGTGGCATCATAGGGCAGGACCGAAGGCCTTTGTTATAATAGACTGGCTGATTTTGGCGGGCCACCCCTTGGTTTGGTGGGCGATAAAAA
13:25665061-25666324_960	TATAATAGACTGGCTGATTTTGGCGGGCCACCCCTTGGTTTGGTGGGCGATAAAAATTTGGTGGCTCTGCAAGAAGATTTTGTCATGTTATATAGTGATATTGTTTGTATGAAGAGTGTG
13:25665061-25666324_1024	CTCTGCAAGAAGATTTTGTCATGTTATATAGTGATATTGTTTGTATGAAGAGTGTGTGCAGTTATTTGGTAATGGCTGTTGTGTTGTCTCACCGGTTTTGATTCTCTGATTCATCAAGTT
13:25665061-25666324_1088	TTTGGTAATGGCTGTTGTGTTGTCTCACCGGTTTTGATTCTCTGATTCATCAAGTTGGTTGAAGACACGGCTTTTGTTCTGTTCATGAAGCTCATGGCTTCCTGGGAGAAGCTTGGGAAG
13:25665061-25666324_1143	TGGTTGAAGACACGGCTTTTGTTCTGTTCATGAAGCTCATGGCTTCCTGGGAGAAGCTTGGGAAGGAGGATTTCATCTGCATGTCGATTTTACGTTTCTTCTCACGACAGCCGTAGGGAT
13:25667900-25668150_0	ATTCTTCTTATTATTATTTACCTTTGTCATCAGGCAGGTATCTGAACTCCATGGGCTCACTGACCTCCTGGTCTGTGGGTCGGCGCAGCTGCATGCGCACAGTGACCGGAGCAGTGATGC
13:25667900-25668150_65	TCCTGGTCTGTGGGTCGGCGCAGCTGCATGCGCACAGTGACCGGAGCAGTGATGCTGGTGTCACAGTAAGCAGGGGTCTTGAACACTATGGCCACTTGTCTGTGCACATCTGCCTGAGAG
13:25667900-25668150_130	GTAAGCAGGGGTCTTGAACACTATGGCCACTTGTCTGTGCACATCTGCCTGAGAGAAAGAGCCTTTGGCCTCCCAGGTCTGAGTGAAGAACCGCACCTCGATGTCATCTAGAGTAAGATC
13:25669500-25669750_0	CAAAATGACTGAAATGCCTTCAAGCGCCTCAAGTTACTCCAAAGACTTAAAAGCGTACCTTTCTGCACTTTATCGCAGAGCAGGAAAATCTCATCGCCTCCCTTTACACTGCCGCTATTC
13:25669500-25669750_65	CACTTTATCGCAGAGCAGGAAAATCTCATCGCCTCCCTTTACACTGCCGCTATTCTTGTTCACCCGGCAGATCCGCAGTTCGGCTGTGTTCGGGGCCCCTGAAAAACAGCACAAGCCAAT
13:25669500-25669750_130	GGCAGATCCGCAGTTCGGCTGTGTTCGGGGCCCCTGAAAAACAGCACAAGCCAATCAGATTGAAGATTAGAAAGTCTTAAGCAACTTGAAACACAGACAAAATGCGCCTGAGGAAATAAT
13:25672950-25673200_0	TATTGTATTGGAGCACACTAGCTTAAGGAAAACATTGAGACAATCCTAATGATACAAACACTCAGAAAAATGTGATTTTGATCCTTAATACTGTGTGCCAACTCACTGTTGTCATAGATG
13:25672950-25673200_65	AAAAATGTGATTTTGATCCTTAATACTGTGTGCCAACTCACTGTTGTCATAGATGGGGTTGGAAACGATGGGAGGCAGCATGGTGCTGTACATCCCGCTCTCATCCTGCAGGTAAATCTG
13:25672950-25673200_130	CGATGGGAGGCAGCATGGTGCTGTACATCCCGCTCTCATCCTGCAGGTAAATCTGGAAGCACAGACGCACCACATTCAGATCATACTCTTCAGTCTGTAGCAGCTGCTCACGGGGAACTG
13:25685919-25686644_0	ATTGAAGGGGTTGATTCCTCGTGTCACCCTCTGCATGATGGCATCCTTCACTTCTCTTCTCCGCACACACTGGATGCCCAGATTCTGAAAACTGTTTAAAGAAAAAGAAACAAATAAAAG
13:25685919-25686644_61	CGCACACACTGGATGCCCAGATTCTGAAAACTGTTTAAAGAAAAAGAAACAAATAAAAGAATCTGTTAACGTATGCATTCTGATTTTGCACCTCCAGCTTTGTTTAGTACTTTATACTGT
13:25685919-25686644_122	TCTGTTAACGTATGCATTCTGATTTTGCACCTCCAGCTTTGTTTAGTACTTTATACTGTCCGACTTGAATGACTAATCCCAAAAACTAAAGCTAACAGGGAGAGTGAGGTTAGAATTAAC
13:25685919-25686644_183	GACTTGAATGACTAATCCCAAAAACTAAAGCTAACAGGGAGAGTGAGGTTAGAATTAACCATACAGACAAATCAAGGGCAAGCTGGAGCTCTCATTTTGCATACCGGGGAATCCCCTGCA
13:25685919-25686644_244	TACAGACAAATCAAGGGCAAGCTGGAGCTCTCATTTTGCATACCGGGGAATCCCCTGCATGGCTCCCTATTCTAAAACAACATGCTTCTTTAACATAAAAAAAAAAGTAGAAGAATGGAC
13:25685919-25686644_305	GCTCCCTATTCTAAAACAACATGCTTCTTTAACATAAAAAAAAAAGTAGAAGAATGGACAGCCCTTCGGAAGAGAAATGTGGTCGTGTGTGGGCTGAGTAAAGGGAAAAGCACACAGGAA
13:25685919-25686644_366	CCCTTCGGAAGAGAAATGTGGTCGTGTGTGGGCTGAGTAAAGGGAAAAGCACACAGGAATGACTTGGATGTGGGGCACAGCAACGTTTCGTTTCATTAAGAGGAAAATGGTAACAGGACC
13:25685919-25686644_427	ACTTGGATGTGGGGCACAGCAACGTTTCGTTTCATTAAGAGGAAAATGGTAACAGGACCAAACAGGATTACAGCAAAATTTAAAGATAATGAAGATTTTTTCTTCTTCTCGTGAGTGACA
13:25685919-25686644_488	ACAGGATTACAGCAAAATTTAAAGATAATGAAGATTTTTTCTTCTTCTCGTGAGTGACAGTGTTCAGATTTTAAAAGATTGAACTTACGCAATGGCCCTTCGTTCAGGTCCAAACTCTGC
13:25685919-25686644_549	GTTCAGATTTTAAAAGATTGAACTTACGCAATGGCCCTTCGTTCAGGTCCAAACTCTGCCTCGTAATATCCATCCTTGCAGTCTTTTCCCACTAGGTCATGGGGATGGGGTTTGTAAGGT
13:25685919-25686644_605	TGCCTCGTAATATCCATCCTTGCAGTCTTTTCCCACTAGGTCATGGGGATGGGGTTTGTAAGGTTCACTTTTGGTCACCAAAGTAACACGCACTTTTCCTTTGCCAGTGACATTAAGAAT
13:25687750-25688000_0	AATACCTGAATGCTTGGGTAGGTTCTGTTATTGTCAGAGCTTCTTTCTCCTGGTATGCTGCCCGCAGAACGACCTTCGCATTTATATCTGAAACGCATGCCTCTCTGTTTGGGCTGCTCG
13:25687750-25688000_65	AGAACGACCTTCGCATTTATATCTGAAACGCATGCCTCTCTGTTTGGGCTGCTCGAAAATCTGAACACATGGCTCTCCCACTGCACAAAAAAAAAAAAAAAAAAACAGGTCAAATTATTC
13:25687750-25688000_130	CACATGGCTCTCCCACTGCACAAAAAAAAAAAAAAAAAAACAGGTCAAATTATTCCGTCAGTTCATTTTAACATTTTTAACACATTTAAAATTCTCAAATGAGTCTTATTAATCATTAAA
13:25689125-25689375_0	TTAAAGATTTAATTGTCTGTCTAAACTTTTTAAGAACCTCCGTTGTGTTCTGATTCGACTCACGGTATGAATGGGTCGCATGATTCAATTAAACCCAGTAAAGAGTAAGAAAAGTAACGT
13:25689125-25689375_65	TATGAATGGGTCGCATGATTCAATTAAACCCAGTAAAGAGTAAGAAAAGTAACGTACAAAGACATGATGAATTGATTAACTGTATAAATACTCGTACTCACCATCCATAACACCAGTGTC
13:25689125-25689375_130	GATGAATTGATTAACTGTATAAATACTCGTACTCACCATCCATAACACCAGTGTCGTAGGTTTGTTATACGTCCGAACTCCAAGAGCTGAACAGATATTCAGAAACACTTCTACTACATA
13:33327908-33328414_0	TCAGATACATACCAGAATTATACATACCAGGTATTGTGTAATGAAAGTCTGTCTGGACGCTGTTATTTTGAAGTTCAGTGGGCAGGAAAAGGTTGTTCTATTGCATTCTCATATGACCAG
13:33327908-33328414_65	TTTTGAAGTTCAGTGGGCAGGAAAAGGTTGTTCTATTGCATTCTCATATGACCAGTTTCTGCAAGGAGGGGGAACTTGTAGATTTGGCTCTGACAACAGGTCCTGGAAATGTGACTTTCC
13:33327908-33328414_130	GAGGGGGAACTTGTAGATTTGGCTCTGACAACAGGTCCTGGAAATGTGACTTTCCAACAGCAAATGTTCTTGTATGCCATGATAACCGACAGACTAGCATTTCATGGGTCTCTAAAATTG
13:33327908-33328414_195	GTTCTTGTATGCCATGATAACCGACAGACTAGCATTTCATGGGTCTCTAAAATTGGAGTGTTTCTGGATCAGGAAGTAGGAACTGTGTTCTTTTACAATGTCTCTGATAAAATGACCCTC
13:33327908-33328414_260	GGATCAGGAAGTAGGAACTGTGTTCTTTTACAATGTCTCTGATAAAATGACCCTCCTGCACCAAATCCAGACCACATTCACTGAGCCCCTCTACGCTGGGTTTTCTTTTCAGGACTGGGA
13:33327908-33328414_325	TCCAGACCACATTCACTGAGCCCCTCTACGCTGGGTTTTCTTTTCAGGACTGGGAAGATTACTCATCTGTAACCATTTGTGATCTGCCATCTGAATTGCAAAAATAGTAAATCTCAGTAT
13:33327908-33328414_386	CTCATCTGTAACCATTTGTGATCTGCCATCTGAATTGCAAAAATAGTAAATCTCAGTATTAAACAAGTCATGGCTAGTGAAAGTTAGTAAACACATAATGGTTTCATTACCAGAAAAAGG
13:36748430-36748950_0	ACGAGTAAGGTGTACCTAATAAAGGGGTCGGTAAGTGTACTTTGCAATTATAGTATTTACTGTATTTGTGTAACAGATACTATTAAAAGTACTCATGCAGCATTGTTTGGCAAGTAATGG
13:36748430-36748950_116	ATGGTTCTTTTACTTGTGTATGACTTTTCAGTACTCTTCCCACCACTGCAAGTATGTAGAGATAGAGATGTAAACAAACAGTTTATCATACCGGTTGGTGTGTGAGTTGTTATGCATGAA
13:36748430-36748950_174	GAGATAGAGATGTAAACAAACAGTTTATCATACCGGTTGGTGTGTGAGTTGTTATGCATGAACCAGGAGCGGTTGTTGTCCACATACATGGCCCATGCTTTATCATCCTTGCCCAGCATC
13:36748430-36748950_232	TGAACCAGGAGCGGTTGTTGTCCACATACATGGCCCATGCTTTATCATCCTTGCCCAGCATCACATCCTTCATCACATCGGCCCGGGCGACGCCAAACGCTGGGTCAGGGTGGTTATCAT
13:36748430-36748950_290	CATCACATCCTTCATCACATCGGCCCGGGCGACGCCAAACGCTGGGTCAGGGTGGTTATCATAGCGATCGATGGTCATCTCCCAGTAATGCACGCCACGAGAAAAGCCAGTGTTTCCCAT
13:36748430-36748950_348	TCATAGCGATCGATGGTCATCTCCCAGTAATGCACGCCACGAGAAAAGCCAGTGTTTCCCATGACCACGCGGTCGTCGTAGCTGTTACACGTCACCGTGAGGTTGTCATTGGACAAGATG
13:36748430-36748950_400	TGTTTCCCATGACCACGCGGTCGTCGTAGCTGTTACACGTCACCGTGAGGTTGTCATTGGACAAGATGATGTCAGGATGAGCCGATGCGGAGTCAAAGGTGAACCAGGCTACTGTAAACA
13:47520077-47520482_0	TCAACTCTTTCTGTTGCAGAATAGTAAAAGACTAAACGTTCTGAATTGTTTACCTGTCCATGTTATGATGATGTGTGGATACAGCAGAAGAGTTAACAGAGATGCTCGGACAGTGAACAC
13:47520077-47520482_57	CCATGTTATGATGATGTGTGGATACAGCAGAAGAGTTAACAGAGATGCTCGGACAGTGAACACTTCCATGTCTGTCGTTGAAAAGACTCGTCTTAAAGCTGTATAAAGAACAATTAGTTC
13:47520077-47520482_114	GAACACTTCCATGTCTGTCGTTGAAAAGACTCGTCTTAAAGCTGTATAAAGAACAATTAGTTCCGTTGTGCTGGTAAAAAGTGGTCTGTTTCAACCCAAACTGTAGATCCGCTTTCACTT
13:47520077-47520482_171	TAGTTCCGTTGTGCTGGTAAAAAGTGGTCTGTTTCAACCCAAACTGTAGATCCGCTTTCACTTTTGTTTTTACTGCTGGGCTATCGTCTTACAGGACCAGCAGGATTTTTGTTGTTGTTG
13:47520077-47520482_228	TCACTTTTGTTTTTACTGCTGGGCTATCGTCTTACAGGACCAGCAGGATTTTTGTTGTTGTTGTAACTTGTTTCATTTTTAGCTTTTGGATAAAGCAAAGCATACGCGGAAGGTGCCTGA
13:47520077-47520482_285	TTGTTGTAACTTGTTTCATTTTTAGCTTTTGGATAAAGCAAAGCATACGCGGAAGGTGCCTGAACAAAATGCTGGCTTTTCTCTTGATTGTTTCTTTTCATGAAGTCATCCTTGGCGCAG
13:47521626-47521895_0	CGAACATGCATTCCAGCAGTTCATTGAGTGTGCGTTTAACAGCCAAGGGCAAGTAGACCGCTCATGGAGATATGGGTATGATGGCAAAGACGTCATGCATGTGGATTTGGCGACTGAAAC
13:47521626-47521895_50	AAGTAGACCGCTCATGGAGATATGGGTATGATGGCAAAGACGTCATGCATGTGGATTTGGCGACTGAAACTGTGGTCGGGACCAGTGAACCTGGCAAACGTTTAGCAGAAGAACGAAAAA
13:47521626-47521895_100	GTGGATTTGGCGACTGAAACTGTGGTCGGGACCAGTGAACCTGGCAAACGTTTAGCAGAAGAACGAAAAAGCACAGAGTACATTAGGAGGAAAGAAGAAAAACTAAAGATTGTGTGCTCT
13:47521626-47521895_149	GTTTAGCAGAAGAACGAAAAAGCACAGAGTACATTAGGAGGAAAGAAGAAAAACTAAAGATTGTGTGCTCTGCTGTGAAAACGGTCTTCCTAAAGTCTAACAATACACTGTCCAGGGCAG
13:47523824-47524096_0	AAAACCAACAGTGCTTTTATTGTCTAATGGAGGTCAGGGTCAGGAATATCTCAAGTGTGTTGTGCGTGGCTTCTATCCAAATGTCATCCGAGTGCGTTGGACCCAAAAGGGAAAGCCAAT
13:47523824-47524096_51	CAAGTGTGTTGTGCGTGGCTTCTATCCAAATGTCATCCGAGTGCGTTGGACCCAAAAGGGAAAGCCAATCTTTTTCGGTGTGTCGACTACTGGAACACTTCCTCACACTGACGGCACGTT
13:47523824-47524096_102	CCAAAAGGGAAAGCCAATCTTTTTCGGTGTGTCGACTACTGGAACACTTCCTCACACTGACGGCACGTTTCAGATGACCTCCTATCTCAGCCTCGGTAATATGACAGCCCATGGTGTTAC
13:47523824-47524096_152	CTCACACTGACGGCACGTTTCAGATGACCTCCTATCTCAGCCTCGGTAATATGACAGCCCATGGTGTTACCTGTGAGATTGAACACTTGAGCATTGATGGGAAACTGAGGAAAAACTATG
13:47524493-47524857_0	GGATAATCCATGGATTCTGTCACAAATCACAGTGGCAGTGGTTGCTTTTATTCTTGGATTTGTGTGCACAATTGCGGTAATATTTGTTTGGAAAAGGCACCAAACAACAAAATCACATGA
13:47524493-47524857_61	GTGTGCACAATTGCGGTAATATTTGTTTGGAAAAGGCACCAAACAACAAAATCACATGATGATGAGACAAATGGCGCAAGTGACGAATCAGAAGCATCTTTATCTTTGAATGTAATGAAT
13:47524493-47524857_122	ATGAGACAAATGGCGCAAGTGACGAATCAGAAGCATCTTTATCTTTGAATGTAATGAATATTTCTCAGGAAACATAAACAATTCTTCTTTTTCTTCTGATTATGGGCACAAACAGACTTT
13:47524493-47524857_183	TTCTCAGGAAACATAAACAATTCTTCTTTTTCTTCTGATTATGGGCACAAACAGACTTTATTTTTATAGATGTGTATTAAGATACACCTGATTTGTTTCTCAGTGAGCAATAAAATACTA
13:47524493-47524857_244	TTTTATAGATGTGTATTAAGATACACCTGATTTGTTTCTCAGTGAGCAATAAAATACTATTGTGATGCCTGAGCTTGTGGATCACTGCTTTGGGAGTTATGTTGTGGAAATTTATTGTGC
14:713482-716719_0	TAATCACATCTACAAAATCATTTATTAATCTCAGGTAATGCAATCAAATAAAATAAAAAGCCACTTCTTTAAATAAATATCTGTTTGGCAATTTGAATCTAAGGGGCTGTTCACACGACA
14:713482-716719_62	ACTTCTTTAAATAAATATCTGTTTGGCAATTTGAATCTAAGGGGCTGTTCACACGACAATGATTTCAATCAAAAACAGGAGACATCAATATCATGTAAACAACCTAAATTAGGCATATGC
14:713482-716719_124	TTTCAATCAAAAACAGGAGACATCAATATCATGTAAACAACCTAAATTAGGCATATGCACACATACTTTTCAGTCAGCCAGCCAAAGCTCTACTAGTGAACTGTCTTCTTTCCATTACAA
14:713482-716719_558	TAAATAGTCATTTAAAAATTTTACCGGAAGCTTATCGTTAGCTGAAATACACTAGCTGTGCAGATAACCCATTAGCAAATCTCCCAATAGTATCTGGATGCAGCCTTTATGATGCAAGTT
14:713482-716719_806	CAGGTCTGCATCTCTCAAATCTCCTCTAATCACTCTTCTTCTCTGTCTGGCGTATTAGGAAGCTCAGCCTGTAGAGCCGCTCTTAGATTTGCCCAAAACAGTTTCTGCTTGGCTCCCTCT
14:713482-716719_868	CTCAGCCTGTAGAGCCGCTCTTAGATTTGCCCAAAACAGTTTCTGCTTGGCTCCCTCTTGTGGCCACTCCAGGTAAGTGCGTCTGGACATCATGGTCTTGAGCTGGTAGTACTTTGAGGG
14:713482-716719_930	GCCACTCCAGGTAAGTGCGTCTGGACATCATGGTCTTGAGCTGGTAGTACTTTGAGGGAATGAGATACAGTGGCAGAGGCTCCAGAAGAATGAGAAGTATGCTGTCCATCCCTCGCGTTA
14:713482-716719_992	AGATACAGTGGCAGAGGCTCCAGAAGAATGAGAAGTATGCTGTCCATCCCTCGCGTTAGCTTCTGATGGTTGGCGAAGTAGAGTTCATAGTGGCACCATTCGCTCTGGACGAAATGAGAC
14:713482-716719_1054	CTGATGGTTGGCGAAGTAGAGTTCATAGTGGCACCATTCGCTCTGGACGAAATGAGACGACAGCACGAAAACACACCTTCTGCTCTGCTCGATGCATCGGAGGATGTTTTGCACGATGGT
14:713482-716719_1116	GCACGAAAACACACCTTCTGCTCTGCTCGATGCATCGGAGGATGTTTTGCACGATGGTTTTTCCCGGGATGAAGTCCCGCTCGTGGTGACACATGCGCAACCCACAGTCGCCTTCAAGCT
14:713482-716719_1178	CCCGGGATGAAGTCCCGCTCGTGGTGACACATGCGCAACCCACAGTCGCCTTCAAGCTTGGGAAGAAATTGAGATTTGACCCATCCTGCGTTTTTCTGGCTGTATGATACAAAGGCATGG
14:713482-716719_1240	AAGAAATTGAGATTTGACCCATCCTGCGTTTTTCTGGCTGTATGATACAAAGGCATGGAAGCGCAACCTTTCCACGTCCTCCTTTTTAAGCTGCGAGGTTATAGAGTAATGCTTGGCGCG
14:713482-716719_1302	GCAACCTTTCCACGTCCTCCTTTTTAAGCTGCGAGGTTATAGAGTAATGCTTGGCGCGAGTCCACTTCCACATCATCCTGACGTACCACGGTATATCCAAACGATTGCACAGAAGGCTAA
14:713482-716719_1364	CACTTCCACATCATCCTGACGTACCACGGTATATCCAAACGATTGCACAGAAGGCTAACAGCAACAATCAAACTGATCGTCGGGATTAGAATCGTGATAGCCAGAATCCATGCATTGCAG
14:713482-716719_1426	AACAATCAAACTGATCGTCGGGATTAGAATCGTGATAGCCAGAATCCATGCATTGCAGGAGATCTCAGGAAGGTAGAAGTCTTCCAATGTGGAGTTGCTCCAGGATTCAGGGTAACTGCA
14:713482-716719_1488	TCTCAGGAAGGTAGAAGTCTTCCAATGTGGAGTTGCTCCAGGATTCAGGGTAACTGCATCTGTATCCGTCTGGCCAATGTCTGAGAGTTGATCTAAAGGTTTTTATTCCCTGTGCATTGA
14:713482-716719_1550	TATCCGTCTGGCCAATGTCTGAGAGTTGATCTAAAGGTTTTTATTCCCTGTGCATTGATCAGAGAGGCAAAATCACGCAACGCACAAGTGCAAATGAAAGGGTTGTGGCTCAAATCGAGA
14:713482-716719_1612	AGAGGCAAAATCACGCAACGCACAAGTGCAAATGAAAGGGTTGTGGCTCAAATCGAGATCTTGGAGATGTTGACAAGTCTTGAGGGATCCTGGTACAGGAGAATGGATGGAGTTGGATCT
14:713482-716719_1674	GGAGATGTTGACAAGTCTTGAGGGATCCTGGTACAGGAGAATGGATGGAGTTGGATCTTATCAGGAGCTTCTGTAGGCTTGGGAATGATCGGCAGGTGGGAAGATCCAGCAAGCGGTTGA
14:713482-716719_1736	AGGAGCTTCTGTAGGCTTGGGAATGATCGGCAGGTGGGAAGATCCAGCAAGCGGTTGAATGTTAAGTCTATGACTTGCAAGGTATCGAAAGTGTGGATGTCTGCAGGAACTGTGGACACT
14:713482-716719_1798	TAAGTCTATGACTTGCAAGGTATCGAAAGTGTGGATGTCTGCAGGAACTGTGGACACTCGGTTGTGCCGAAGGTTTAGGACTTGCACAGAATCTGGCAAACACTTGAAGACGACTTCGTC
14:713482-716719_1860	TGTGCCGAAGGTTTAGGACTTGCACAGAATCTGGCAAACACTTGAAGACGACTTCGTCGAATCCATTTCTAGACAAGTCTACATGAAGGACTCTGGGAGGCCAGAAACACCTGCCTTGAT
14:713482-716719_1922	CCATTTCTAGACAAGTCTACATGAAGGACTCTGGGAGGCCAGAAACACCTGCCTTGATTCTCCGAATAGGTAAGTGTGTTCTGACTGAGGTCGATGTATTGGAGCGAGTCCATCAGGTTA
14:713482-716719_1984	CGAATAGGTAAGTGTGTTCTGACTGAGGTCGATGTATTGGAGCGAGTCCATCAGGTTAATTCTTGAAGTCAGTGGACTTAGATGCTTTAGGTTGTTGCCCCTCAAAACCAGCCTTGTCAG
14:713482-716719_2046	TTGAAGTCAGTGGACTTAGATGCTTTAGGTTGTTGCCCCTCAAAACCAGCCTTGTCAGGTTTACCAGCGTACCACATTCTGTCTCGGGATTAACCGAGAAGATTTTTTCTGTAAGGGCGC
14:713482-716719_2108	ACCAGCGTACCACATTCTGTCTCGGGATTAACCGAGAAGATTTTTTCTGTAAGGGCGCAATCAGACAAATCCAACTCCTGGATCTTGCTGATCGTCCCAGGACAGGTCATAAAGATTATA
14:713482-716719_2170	AGACAAATCCAACTCCTGGATCTTGCTGATCGTCCCAGGACAGGTCATAAAGATTATAGGCGACTCGGTTAGACTTACTTTCCTCGCAGGTGTGTTTATGAAGAAGTCATACAGCATTTT
14:713482-716719_2232	ACTCGGTTAGACTTACTTTCCTCGCAGGTGTGTTTATGAAGAAGTCATACAGCATTTTTTGGTCAAAGATGAACGTGGTTACTGACGCTCTTTTTGTAGAGAATGACTCCAGTATGTGGG
14:713482-716719_2294	TCAAAGATGAACGTGGTTACTGACGCTCTTTTTGTAGAGAATGACTCCAGTATGTGGGTTGAGGATTGATTAACACCATCCTTCATTTCTGTCAGGGTAAGATCTGTTAAGGAAAGCTCA
14:713482-716719_2356	GGATTGATTAACACCATCCTTCATTTCTGTCAGGGTAAGATCTGTTAAGGAAAGCTCACGAATGGTGGACGATAGTATCGTGTTTACCGAACTTGTCAGAAATTCCCATGTGGTTTTCAC
14:713482-716719_2418	TGGTGGACGATAGTATCGTGTTTACCGAACTTGTCAGAAATTCCCATGTGGTTTTCACATTGGAGATTTCCAATCGAACAGTGTGCATGAGTGCTCGACTGCGCATCTGCTGGACTACCT
14:713482-716719_2480	GAGATTTCCAATCGAACAGTGTGCATGAGTGCTCGACTGCGCATCTGCTGGACTACCTCCATCTTGCCGTCCACCTTAGTGAATTCAACCTCTTTAAAACGTGCAAAAACATCATTAGCG
14:713482-716719_2542	CTTGCCGTCCACCTTAGTGAATTCAACCTCTTTAAAACGTGCAAAAACATCATTAGCGATAGCGATATCCACGTTAGTACTTGAAAGGGCGATGACTGCCTTTTCTGCGTGTACGTCATC
14:713482-716719_2604	CGATATCCACGTTAGTACTTGAAAGGGCGATGACTGCCTTTTCTGCGTGTACGTCATCTAAACTATTCCCCTCATACGTCAATAACCCGTCAGCATTGATGAAGAGTGTTCTCAAGGTGA
14:713482-716719_2666	CTATTCCCCTCATACGTCAATAACCCGTCAGCATTGATGAAGAGTGTTCTCAAGGTGAGATTGGATATATGAGTAAAGTCTTGGATGCTGATTGATTTGGCGCTCAATCCCAACCACTGC
14:713482-716719_2728	GGATATATGAGTAAAGTCTTGGATGCTGATTGATTTGGCGCTCAATCCCAACCACTGCAGGCGTTTTAGCATCGAGAACTCCTTTCCTAAAGCCATGGCTGAAAACCGATTGGATGACAG
14:713482-716719_2790	GTTTTAGCATCGAGAACTCCTTTCCTAAAGCCATGGCTGAAAACCGATTGGATGACAGGTCTAAAAGCTCCAAACATCCCAAATGAAGCAGATACTGCTGTTCGGAGAGGTTCTGGAGTC
14:713482-716719_2852	AAAAGCTCCAAACATCCCAAATGAAGCAGATACTGCTGTTCGGAGAGGTTCTGGAGTCCGTTGTGAGACAAATCCAACATCTCCAGAGCTGGAGTAGATGTGAATGTGTCTCTGTCGATG
14:713482-716719_2914	GTGAGACAAATCCAACATCTCCAGAGCTGGAGTAGATGTGAATGTGTCTCTGTCGATGTTTTCCAGAATATTCCAGGACAGATTGAGGAATCGCAGACGTGGTGTTGTGTTGAAGTCTTT
14:713482-716719_2976	CCAGAATATTCCAGGACAGATTGAGGAATCGCAGACGTGGTGTTGTGTTGAAGTCTTTGCAGTTTAGTGACTGGATGTGGTTTAGCGACAGATCCAGGTCCTCGGTGGATGGTTTAAGGT
14:713482-716719_3038	TTTAGTGACTGGATGTGGTTTAGCGACAGATCCAGGTCCTCGGTGGATGGTTTAAGGTCATCTGGGACCGAGGACAGATTCTGAGAGGAGTAATTGACTATGATCCTCTGAATGGCGGGA
14:713482-716719_3100	TGGGACCGAGGACAGATTCTGAGAGGAGTAATTGACTATGATCCTCTGAATGGCGGGAATGAGAGACGGATGGAAACATGTGAGATAAACAGACACTAACCACCAGCCTGAAGACGGCTT
14:713482-716719_3117	TCTGAGAGGAGTAATTGACTATGATCCTCTGAATGGCGGGAATGAGAGACGGATGGAAACATGTGAGATAAACAGACACTAACCACCAGCCTGAAGACGGCTTCATCTTTCTGAGGTAAT
14:740030-740550_0	AACAACTAAAATAATATGAAGTTTATAACATAAAAAAAAATAGAATTAAAATAAAAACAAATTAAAAATGTTAAACTACAACAACTTATATAGTAACCTGTGAGTGAGTCCAGGAAGGTC
14:740030-740550_58	AAATTAAAAATGTTAAACTACAACAACTTATATAGTAACCTGTGAGTGAGTCCAGGAAGGTCAGCTTTCCGGCGTCCCAGTCCAGCAGCACCGTGACCCTGCTGACCCTCTGTCGGACCC
14:740030-740550_116	GGTCAGCTTTCCGGCGTCCCAGTCCAGCAGCACCGTGACCCTGCTGACCCTCTGTCGGACCCCCAGCCGGGACAGACTCTCTCCGCAGCAGCCCTGGCCGTACTCCCCACTCTGGAAGCC
14:740030-740550_174	ACCCCCAGCCGGGACAGACTCTCTCCGCAGCAGCCCTGGCCGTACTCCCCACTCTGGAAGCCCAGGATCCACAGTCCAGATTCGGGCAGCTGGTCTTGGGTCTGCAGGGCGGATTCAGAG
14:740030-740550_232	AGCCCAGGATCCACAGTCCAGATTCGGGCAGCTGGTCTTGGGTCTGCAGGGCGGATTCAGAGATCACTCCTAAAGCCCAGACGCTGCTGTCGCCCACATGCACGTCCCAGCGGTGCGACC
14:740030-740550_290	AGAGATCACTCCTAAAGCCCAGACGCTGCTGTCGCCCACATGCACGTCCCAGCGGTGCGACCCGGAGCCCAGAGCCACAGAGCCCAAAACACTGGAGTAACCCTCACGCCCACCTGCAAT
14:740030-740550_348	GACCCGGAGCCCAGAGCCACAGAGCCCAAAACACTGGAGTAACCCTCACGCCCACCTGCAATACACAGAGCTGGAGGACAGCGGCGGCTGAAGCGGAGCGAGCGCAGACCCGCACACACA
14:740030-740550_400	CACCTGCAATACACAGAGCTGGAGGACAGCGGCGGCTGAAGCGGAGCGAGCGCAGACCCGCACACACACGCACGCAAGGGTGAGCAGAGTTCGGGTCCAGCACCACTGGAGCTGCGGAGG
14:15668609-15669143_0	CACTCAAAAGGGAAGTGGAGGATGCGGATGGCTTGGGCTTTTTGGCCGTGTTCACTGACGCATGTGCTGAAAAAGGGGAAGACTTTTCCTCTCGGCCCACTGGAGAAGGAATACAGCAGT
14:15668609-15669143_60	CATGTGCTGAAAAAGGGGAAGACTTTTCCTCTCGGCCCACTGGAGAAGGAATACAGCAGTGTCATGTTATCTGCATTATAAAAGGACACTTTACTTTCCTCGCAATCCAGGAAAATGCCA
14:15668609-15669143_120	GTCATGTTATCTGCATTATAAAAGGACACTTTACTTTCCTCGCAATCCAGGAAAATGCCAATCCTGCAAGGTGAGGTTATCACGGTCAGCCGCGTCCATGGCTGAGTGCCAGCTGAGTAC
14:15668609-15669143_180	ATCCTGCAAGGTGAGGTTATCACGGTCAGCCGCGTCCATGGCTGAGTGCCAGCTGAGTACTGGTTGGCATCACGCAGCCGCAGGGTCCAGTAGCCATTATCAGGACACAGTTTGACTCTG
[truncated: 17,291 more rows]
