# Supplementary material for: Copy number variation and population-specific immune genes in the model vertebrate zebrafish
Source: eLife. 2024 Jun 4;13:e98058. doi: 10.7554/eLife.98058 (PMC11192531; doi:10.7554/eLife.98058)
Supplement: Figure 3—source data 1. [file elife-98058-fig3-data1.xlsx]

## Sheet: fig3_heatmap
Population	Fish	Order	Cluster	Absolute_Reads	Relative_Reads
TU	TU01	1	cluster_3	0	0
TU	TU01	1	cluster_5	5	0.003739
TU	TU01	1	cluster_6	0	0
TU	TU01	1	cluster_24	0	0
TU	TU01	1	cluster_31	1	0.000747
TU	TU01	1	cluster_35	0	0
TU	TU01	1	cluster_36	0	0
TU	TU01	1	cluster_37	0	0
TU	TU01	1	cluster_39	31	0.023186
TU	TU01	1	cluster_40	0	0
TU	TU01	1	cluster_41	0	0
TU	TU01	1	cluster_42	0	0
TU	TU01	1	cluster_43	8	0.005983
TU	TU01	1	cluster_44	4	0.002991
TU	TU01	1	cluster_48	0	0
TU	TU01	1	cluster_52	0	0
TU	TU01	1	cluster_54	0	0
TU	TU01	1	cluster_57	0	0
TU	TU01	1	cluster_59	1	0.000747
TU	TU01	1	cluster_60	0	0
TU	TU01	1	cluster_61	0	0
TU	TU01	1	cluster_62	0	0
TU	TU01	1	cluster_63	0	0
TU	TU01	1	cluster_66	2	0.001495
TU	TU01	1	cluster_71	4	0.002991
TU	TU01	1	cluster_74	0	0
TU	TU01	1	cluster_78	0	0
TU	TU01	1	cluster_79	0	0
TU	TU01	1	cluster_85	5	0.003739
TU	TU01	1	cluster_86	0	0
TU	TU01	1	cluster_91	0	0
TU	TU01	1	cluster_92	0	0
TU	TU01	1	cluster_93	9	0.006731
TU	TU01	1	cluster_95	0	0
TU	TU01	1	cluster_96	0	0
TU	TU01	1	cluster_223	0	0
TU	TU01	1	cluster_225	5	0.003739
TU	TU01	1	cluster_231	0	0
TU	TU01	1	cluster_235	5	0.003739
TU	TU01	1	cluster_241	10	0.007479
TU	TU01	1	cluster_248	0	0
TU	TU01	1	cluster_250	1	0.000747
TU	TU01	1	cluster_259	3	0.002243
TU	TU01	1	cluster_263	0	0
TU	TU01	1	cluster_283	0	0
TU	TU01	1	cluster_285	0	0
TU	TU01	1	cluster_288	0	0
TU	TU01	1	cluster_293	3	0.002243
TU	TU01	1	cluster_298	0	0
TU	TU01	1	cluster_311	3	0.002243
TU	TU01	1	cluster_318	0	0
TU	TU01	1	cluster_325n	0	0
TU	TU01	1	cluster_337	0	0
TU	TU01	1	cluster_338	0	0
TU	TU01	1	cluster_339	0	0
TU	TU01	1	cluster_341	0	0
TU	TU01	1	cluster_353	0	0
TU	TU01	1	cluster_357	0	0
TU	TU01	1	cluster_360	0	0
TU	TU01	1	cluster_372	4	0.002991
TU	TU01	1	cluster_375	0	0
TU	TU01	1	cluster_380	0	0
TU	TU01	1	cluster_387	0	0
TU	TU01	1	cluster_394	0	0
TU	TU01	1	cluster_396	8	0.005983
TU	TU01	1	cluster_397	0	0
TU	TU01	1	cluster_399	0	0
TU	TU01	1	cluster_400	1	0.000747
TU	TU01	1	cluster_403	0	0
TU	TU01	1	cluster_404	0	0
TU	TU01	1	cluster_406	0	0
TU	TU01	1	cluster_411	2	0.001495
TU	TU01	1	cluster_413	16	0.011967
TU	TU01	1	cluster_414	0	0
TU	TU01	1	cluster_416	0	0
TU	TU01	1	cluster_419	0	0
TU	TU01	1	cluster_422	0	0
TU	TU01	1	cluster_423	0	0
TU	TU01	1	cluster_424	3	0.002243
TU	TU01	1	cluster_426	10	0.007479
TU	TU01	1	cluster_427	0	0
TU	TU01	1	cluster_428	0	0
TU	TU01	1	cluster_429	0	0
TU	TU01	1	cluster_431	0	0
TU	TU01	1	cluster_433	0	0
TU	TU01	1	cluster_437	0	0
TU	TU01	1	cluster_443	0	0
TU	TU01	1	cluster_446	0	0
TU	TU01	1	cluster_464	0	0
TU	TU01	1	cluster_469	0	0
TU	TU01	1	cluster_483	3	0.002243
TU	TU01	1	cluster_486	1	0.000747
TU	TU01	1	cluster_490	0	0
TU	TU01	1	cluster_493	25	0.018698
TU	TU01	1	cluster_496	0	0
TU	TU01	1	cluster_510	0	0
TU	TU01	1	cluster_512	0	0
TU	TU01	1	cluster_516	0	0
TU	TU01	1	cluster_544	3	0.002243
TU	TU01	1	cluster_558	2	0.001495
TU	TU01	1	cluster_575	0	0
TU	TU01	1	cluster_576	0	0
TU	TU01	1	cluster_577	3	0.002243
TU	TU01	1	cluster_579	0	0
TU	TU01	1	cluster_587	1	0.000747
TU	TU01	1	cluster_591	0	0
TU	TU01	1	cluster_592	5	0.003739
TU	TU01	1	cluster_601n	0	0
TU	TU01	1	cluster_605	0	0
TU	TU01	1	cluster_608	1	0.000747
TU	TU01	1	cluster_612	0	0
TU	TU01	1	cluster_617	3	0.002243
TU	TU01	1	cluster_623	0	0
TU	TU01	1	cluster_627	7	0.005235
TU	TU01	1	cluster_630	7	0.005235
TU	TU01	1	cluster_632	0	0
TU	TU01	1	cluster_635	0	0
TU	TU01	1	cluster_650	8	0.005983
TU	TU01	1	cluster_651	0	0
TU	TU01	1	cluster_652	0	0
TU	TU01	1	cluster_656	0	0
TU	TU01	1	cluster_661	0	0
TU	TU01	1	cluster_666	0	0
TU	TU01	1	cluster_671	8	0.005983
TU	TU01	1	cluster_681	8	0.005983
TU	TU01	1	cluster_684	0	0
TU	TU01	1	cluster_686	1	0.000747
TU	TU01	1	cluster_691	0	0
TU	TU01	1	cluster_698	8	0.005983
TU	TU01	1	cluster_727	0	0
TU	TU01	1	cluster_744	0	0
TU	TU01	1	cluster_779	0	0
TU	TU01	1	cluster_790	3	0.002243
TU	TU01	1	cluster_796	4	0.002991
TU	TU01	1	cluster_805	20	0.014958
TU	TU01	1	cluster_807	0	0
TU	TU01	1	cluster_809	0	0
TU	TU01	1	cluster_844	0	0
TU	TU01	1	cluster_850	8	0.005983
TU	TU01	1	cluster_862	6	0.004487
TU	TU01	1	cluster_868	0	0
TU	TU01	1	cluster_892	10	0.007479
TU	TU01	1	cluster_904	2	0.001495
TU	TU01	1	cluster_936	0	0
TU	TU01	1	cluster_946	0	0
TU	TU01	1	cluster_949	7	0.005235
TU	TU01	1	cluster_952	26	0.019446
TU	TU01	1	cluster_957	29	0.02169
TU	TU01	1	cluster_961	0	0
TU	TU01	1	cluster_962	0	0
TU	TU01	1	cluster_976	0	0
TU	TU01	1	cluster_980n	4	0.002991
TU	TU01	1	cluster_986	0	0
TU	TU01	1	cluster_1009n	0	0
TU	TU01	1	cluster_1039n	3	0.002243
TU	TU01	1	cluster_1231n	0	0
TU	TU01	1	cluster_1367n	0	0
TU	TU01	1	cluster_2001	0	0
TU	TU01	1	cluster_2003	18	0.013462
TU	TU01	1	cluster_2005	0	0
TU	TU01	1	cluster_2009	0	0
TU	TU01	1	cluster_2023	0	0
TU	TU01	1	cluster_2026	0	0
TU	TU01	1	cluster_2032	0	0
TU	TU01	1	cluster_2034	0	0
TU	TU01	1	cluster_2035	0	0
TU	TU01	1	cluster_2036	0	0
TU	TU01	1	cluster_2041	0	0
TU	TU01	1	cluster_2042	0	0
TU	TU01	1	cluster_2044	0	0
TU	TU01	1	cluster_2045	0	0
TU	TU01	1	cluster_2049	0	0
TU	TU01	1	cluster_2056	0	0
TU	TU01	1	cluster_2057	0	0
TU	TU01	1	cluster_2069	0	0
TU	TU01	1	cluster_2070	0	0
TU	TU01	1	cluster_2076	0	0
TU	TU01	1	cluster_2085	0	0
TU	TU01	1	cluster_2087	0	0
TU	TU01	1	cluster_2090	0	0
TU	TU01	1	cluster_2173n	0	0
TU	TU01	1	cluster_2200	0	0
TU	TU01	1	cluster_2203	0	0
TU	TU01	1	cluster_2208	0	0
TU	TU01	1	cluster_2211	0	0
TU	TU01	1	cluster_2215	0	0
TU	TU01	1	cluster_2223	0	0
TU	TU01	1	cluster_2229	0	0
TU	TU01	1	cluster_2232	0	0
TU	TU01	1	cluster_2239	0	0
TU	TU01	1	cluster_2242	1	0.000747
TU	TU01	1	cluster_2244	0	0
TU	TU01	1	cluster_2255	0	0
TU	TU01	1	cluster_2271	0	0
TU	TU01	1	cluster_2272	0	0
TU	TU01	1	cluster_2276	0	0
TU	TU01	1	cluster_2282	0	0
TU	TU01	1	cluster_2284	0	0
TU	TU01	1	cluster_2287n	0	0
TU	TU01	1	cluster_2289	0	0
TU	TU01	1	cluster_2299	0	0
TU	TU01	1	cluster_2300	0	0
TU	TU01	1	cluster_2304	1	0.000747
TU	TU01	1	cluster_2305	0	0
TU	TU01	1	cluster_2311	0	0
TU	TU01	1	cluster_2312	0	0
TU	TU01	1	cluster_2315	4	0.002991
TU	TU01	1	cluster_2330	0	0
TU	TU01	1	cluster_2333	0	0
TU	TU01	1	cluster_2334	0	0
TU	TU01	1	cluster_2335	0	0
TU	TU01	1	cluster_2339	0	0
TU	TU01	1	cluster_2342	0	0
TU	TU01	1	cluster_2349	0	0
TU	TU01	1	cluster_2354	0	0
TU	TU01	1	cluster_2356	0	0
TU	TU01	1	cluster_2370	0	0
TU	TU01	1	cluster_2391	6	0.004487
TU	TU01	1	cluster_2392	2	0.001495
TU	TU01	1	cluster_2398	3	0.002243
TU	TU01	1	cluster_2400	0	0
TU	TU01	1	cluster_2411	0	0
TU	TU01	1	cluster_2413	0	0
TU	TU01	1	cluster_2417	0	0
TU	TU01	1	cluster_2426	0	0
TU	TU01	1	cluster_2427	0	0
TU	TU01	1	cluster_2434	0	0
TU	TU01	1	cluster_2442	0	0
TU	TU01	1	cluster_2443	0	0
TU	TU01	1	cluster_2445	0	0
TU	TU01	1	cluster_2445n	0	0
TU	TU01	1	cluster_2447	0	0
TU	TU01	1	cluster_2466	0	0
TU	TU01	1	cluster_2471	0	0
TU	TU01	1	cluster_2481	0	0
TU	TU01	1	cluster_2487	1	0.000747
TU	TU01	1	cluster_2493	0	0
TU	TU01	1	cluster_2502	0	0
TU	TU01	1	cluster_2504	4	0.002991
TU	TU01	1	cluster_2530	0	0
TU	TU01	1	cluster_2546	5	0.003739
TU	TU01	1	cluster_2547	0	0
TU	TU01	1	cluster_2548	0	0
TU	TU01	1	cluster_2551	1	0.000747
TU	TU01	1	cluster_2553	0	0
TU	TU01	1	cluster_2560	0	0
TU	TU01	1	cluster_2565	0	0
TU	TU01	1	cluster_2566	0	0
TU	TU01	1	cluster_2572	0	0
TU	TU01	1	cluster_2577	0	0
TU	TU01	1	cluster_2584	0	0
TU	TU01	1	cluster_2589	0	0
TU	TU01	1	cluster_2625	0	0
TU	TU01	1	cluster_2627	0	0
TU	TU01	1	cluster_2628	0	0
TU	TU01	1	cluster_2630	0	0
TU	TU01	1	cluster_2631	0	0
TU	TU01	1	cluster_2632	0	0
TU	TU01	1	cluster_2636	0	0
TU	TU01	1	cluster_2637	0	0
TU	TU01	1	cluster_2648	0	0
TU	TU01	1	cluster_2655	1	0.000747
TU	TU01	1	cluster_2659	0	0
TU	TU01	1	cluster_2673	0	0
TU	TU01	1	cluster_2815	0	0
TU	TU01	1	cluster_2833	14	0.010471
TU	TU01	1	cluster_2866	0	0
TU	TU01	1	cluster_2868	0	0
TU	TU01	1	cluster_2877	0	0
TU	TU01	1	cluster_2878n	0	0
TU	TU01	1	cluster_2879	0	0
TU	TU01	1	cluster_2886	9	0.006731
TU	TU01	1	cluster_2924	0	0
TU	TU01	1	cluster_2934	0	0
TU	TU01	1	cluster_2937	0	0
TU	TU01	1	cluster_2944n	0	0
TU	TU01	1	cluster_2945	0	0
TU	TU01	1	cluster_2992	0	0
TU	TU01	1	cluster_3041n	0	0
TU	TU01	1	cluster_3100	0	0
TU	TU01	1	cluster_3108	0	0
TU	TU01	1	cluster_3125	0	0
TU	TU01	1	cluster_3126	0	0
TU	TU01	1	cluster_3128	0	0
TU	TU01	1	cluster_3149	0	0
TU	TU01	1	cluster_3152	0	0
TU	TU01	1	cluster_3183	5	0.003739
TU	TU01	1	cluster_3331	0	0
TU	TU01	1	cluster_3338	0	0
TU	TU01	1	cluster_3346	0	0
TU	TU01	1	cluster_3347	0	0
TU	TU01	1	cluster_3350	0	0
TU	TU01	1	cluster_3371	0	0
TU	TU01	1	cluster_3382	0	0
TU	TU01	1	cluster_3401	0	0
TU	TU01	1	cluster_3428	0	0
TU	TU01	1	cluster_3429	0	0
TU	TU01	1	cluster_3438	0	0
TU	TU01	1	cluster_3478	12	0.008975
TU	TU01	1	cluster_3479	0	0
TU	TU01	1	cluster_3488	0	0
TU	TU01	1	cluster_3536	0	0
TU	TU01	1	cluster_3546	0	0
TU	TU01	1	cluster_3547	0	0
TU	TU01	1	cluster_3548	0	0
TU	TU01	1	cluster_3553	0	0
TU	TU01	1	cluster_3556	0	0
TU	TU01	1	cluster_3564	0	0
TU	TU01	1	cluster_3566	0	0
TU	TU01	1	cluster_3595	0	0
TU	TU01	1	cluster_3602	0	0
TU	TU01	1	cluster_3605	0	0
TU	TU01	1	cluster_3633	0	0
TU	TU01	1	cluster_3645	0	0
TU	TU01	1	cluster_3662	0	0
TU	TU01	1	cluster_3690	0	0
TU	TU01	1	cluster_3704	0	0
TU	TU01	1	cluster_3718	0	0
TU	TU01	1	cluster_3725	0	0
TU	TU01	1	cluster_3728	1	0.000747
TU	TU01	1	cluster_3733	0	0
TU	TU01	1	cluster_3743	0	0
TU	TU01	1	cluster_3746	0	0
TU	TU01	1	cluster_3750	0	0
TU	TU01	1	cluster_3751	8	0.005983
TU	TU01	1	cluster_3757	0	0
TU	TU01	1	cluster_3795	0	0
TU	TU01	1	cluster_3808	0	0
TU	TU01	1	cluster_3810	0	0
TU	TU01	1	cluster_3844	0	0
TU	TU01	1	cluster_3860	0	0
TU	TU01	1	cluster_3865	0	0
TU	TU01	1	cluster_3877	0	0
TU	TU01	1	cluster_3879	0	0
TU	TU01	1	cluster_3903	0	0
TU	TU01	1	cluster_3931	0	0
TU	TU01	1	cluster_3971	0	0
TU	TU01	1	cluster_3979	0	0
TU	TU01	1	cluster_3981	0	0
TU	TU01	1	cluster_3991	0	0
TU	TU01	1	cluster_4001	0	0
TU	TU01	1	cluster_4013	0	0
TU	TU01	1	cluster_4015	0	0
TU	TU01	1	cluster_4038	0	0
TU	TU01	1	cluster_4040	0	0
TU	TU01	1	cluster_4048	0	0
TU	TU01	1	cluster_4060	0	0
TU	TU01	1	cluster_4061	0	0
TU	TU01	1	cluster_4068	0	0
TU	TU01	1	cluster_4075	0	0
TU	TU01	1	cluster_4078	3	0.002243
TU	TU01	1	cluster_4087	0	0
TU	TU01	1	cluster_4112	0	0
TU	TU01	1	cluster_4127	0	0
TU	TU01	1	cluster_4132	0	0
TU	TU01	1	cluster_4136	0	0
TU	TU01	1	cluster_4144	0	0
TU	TU01	1	cluster_4163	0	0
TU	TU01	1	cluster_4170	0	0
TU	TU01	1	cluster_4174	13	0.009723
TU	TU01	1	cluster_4185	0	0
TU	TU01	1	cluster_4197	0	0
TU	TU01	1	cluster_4198	0	0
TU	TU01	1	cluster_4235	0	0
TU	TU01	1	cluster_4240	0	0
TU	TU01	1	cluster_4242	0	0
TU	TU01	1	cluster_4269	0	0
TU	TU01	1	cluster_4285	2	0.001495
TU	TU01	1	cluster_4293	0	0
TU	TU01	1	cluster_4344	0	0
TU	TU01	1	cluster_4377	0	0
TU	TU01	1	cluster_4397	0	0
TU	TU01	1	cluster_4399	0	0
TU	TU01	1	cluster_4408	6	0.004487
TU	TU01	1	cluster_4439	0	0
TU	TU01	1	cluster_4457	0	0
TU	TU01	1	cluster_4460	0	0
TU	TU01	1	cluster_4466	0	0
TU	TU01	1	cluster_4480	0	0
TU	TU01	1	cluster_4494n	0	0
TU	TU01	1	cluster_4530n	2	0.001495
TU	TU01	1	cluster_4626	0	0
TU	TU01	1	cluster_4642	0	0
TU	TU01	1	cluster_4651n	0	0
TU	TU01	1	cluster_4800	0	0
TU	TU01	1	cluster_4809	0	0
TU	TU01	1	cluster_4820	0	0
TU	TU01	1	cluster_4833	2	0.001495
TU	TU01	1	cluster_4835	3	0.002243
TU	TU01	1	cluster_4864	7	0.005235
TU	TU01	1	cluster_4872	0	0
TU	TU01	1	cluster_4882	0	0
TU	TU01	1	cluster_4914	12	0.008975
TU	TU01	1	cluster_4932	0	0
TU	TU01	1	cluster_4946	0	0
TU	TU01	1	cluster_4968	0	0
TU	TU01	1	cluster_4986	0	0
TU	TU01	1	cluster_5068n	0	0
TU	TU01	1	cluster_5111	0	0
TU	TU01	1	cluster_5122	0	0
TU	TU01	1	cluster_5182	0	0
TU	TU01	1	cluster_5186	0	0
TU	TU01	1	cluster_5228	0	0
TU	TU01	1	cluster_5237	0	0
TU	TU01	1	cluster_5241	0	0
TU	TU01	1	cluster_5249	0	0
TU	TU01	1	cluster_5252	0	0
TU	TU01	1	cluster_5258	0	0
TU	TU01	1	cluster_5265	0	0
TU	TU01	1	cluster_5283	0	0
TU	TU01	1	cluster_5292	0	0
TU	TU01	1	cluster_5312	0	0
TU	TU01	1	cluster_5322	4	0.002991
TU	TU01	1	cluster_5341n	0	0
TU	TU01	1	cluster_5347	0	0
TU	TU01	1	cluster_5367	0	0
TU	TU01	1	cluster_5369	0	0
TU	TU01	1	cluster_5391	0	0
TU	TU01	1	cluster_5401	0	0
TU	TU01	1	cluster_5410	0	0
TU	TU01	1	cluster_5411	0	0
TU	TU01	1	cluster_5413	0	0
TU	TU01	1	cluster_5416	0	0
TU	TU01	1	cluster_5425	0	0
TU	TU01	1	cluster_5444	0	0
TU	TU01	1	cluster_5453	0	0
TU	TU01	1	cluster_5456	0	0
TU	TU01	1	cluster_5463	0	0
TU	TU01	1	cluster_5465	1	0.000747
TU	TU01	1	cluster_5469	0	0
TU	TU01	1	cluster_5492	0	0
TU	TU01	1	cluster_5499	0	0
TU	TU01	1	cluster_5501	0	0
TU	TU01	1	cluster_5525	0	0
TU	TU01	1	cluster_5527	0	0
TU	TU01	1	cluster_5534	0	0
TU	TU01	1	cluster_5537	0	0
TU	TU01	1	cluster_5543	4	0.002991
TU	TU01	1	cluster_5557	0	0
TU	TU01	1	cluster_5558	0	0
TU	TU01	1	cluster_5561	1	0.000747
TU	TU01	1	cluster_5562	0	0
TU	TU01	1	cluster_5571	0	0
TU	TU01	1	cluster_5572	0	0
TU	TU01	1	cluster_5573	0	0
TU	TU01	1	cluster_5579	0	0
TU	TU01	1	cluster_5580	0	0
TU	TU01	1	cluster_5581	7	0.005235
TU	TU01	1	cluster_5582	0	0
TU	TU01	1	cluster_5590	0	0
TU	TU01	1	cluster_5592	0	0
TU	TU01	1	cluster_5595	0	0
TU	TU01	1	cluster_5598	0	0
TU	TU01	1	cluster_5599	0	0
TU	TU01	1	cluster_5600	0	0
TU	TU01	1	cluster_5606	0	0
TU	TU01	1	cluster_5608	0	0
TU	TU01	1	cluster_5610	0	0
TU	TU01	1	cluster_5615	0	0
TU	TU01	1	cluster_5622	3	0.002243
TU	TU01	1	cluster_5624	0	0
TU	TU01	1	cluster_5626	0	0
TU	TU01	1	cluster_5631	0	0
TU	TU01	1	cluster_5638	0	0
TU	TU01	1	cluster_5644	0	0
TU	TU01	1	cluster_5645	0	0
TU	TU01	1	cluster_5646	0	0
TU	TU01	1	cluster_5649	7	0.005235
TU	TU01	1	cluster_5659	0	0
TU	TU01	1	cluster_5661	0	0
TU	TU01	1	cluster_5664	0	0
TU	TU01	1	cluster_5666	0	0
TU	TU01	1	cluster_5668	0	0
TU	TU01	1	cluster_5674	5	0.003739
TU	TU01	1	cluster_5685	0	0
TU	TU01	1	cluster_5687	0	0
TU	TU01	1	cluster_5702	0	0
TU	TU01	1	cluster_5723	0	0
TU	TU01	1	cluster_5725	0	0
TU	TU01	1	cluster_5728	0	0
TU	TU01	1	cluster_5730	0	0
TU	TU01	1	cluster_5731	0	0
TU	TU01	1	cluster_5734	0	0
TU	TU01	1	cluster_5755	0	0
TU	TU01	1	cluster_5764	0	0
TU	TU01	1	cluster_5775	0	0
TU	TU01	1	cluster_5777	0	0
TU	TU01	1	cluster_5779	0	0
TU	TU01	1	cluster_5787	0	0
TU	TU01	1	cluster_5792	0	0
TU	TU01	1	cluster_5806	0	0
TU	TU01	1	cluster_5812	0	0
TU	TU01	1	cluster_5815	7	0.005235
TU	TU01	1	cluster_5817	0	0
TU	TU01	1	cluster_5832	0	0
TU	TU01	1	cluster_5835	0	0
TU	TU01	1	cluster_5836	0	0
TU	TU01	1	cluster_5845	0	0
TU	TU01	1	cluster_5847	0	0
TU	TU01	1	cluster_5862	0	0
TU	TU01	1	cluster_5871	0	0
TU	TU01	1	cluster_5880	0	0
TU	TU01	1	cluster_5901	0	0
TU	TU01	1	cluster_5904	0	0
TU	TU01	1	cluster_5906	0	0
TU	TU01	1	cluster_5914	0	0
TU	TU01	1	cluster_5920	1	0.000747
TU	TU01	1	cluster_5928	0	0
TU	TU01	1	cluster_5958	0	0
TU	TU01	1	cluster_5960	0	0
TU	TU01	1	cluster_6008	4	0.002991
TU	TU01	1	cluster_6011	0	0
TU	TU01	1	cluster_6021	0	0
TU	TU01	1	cluster_6024	0	0
TU	TU01	1	cluster_6040	0	0
TU	TU01	1	cluster_6043	0	0
TU	TU01	1	cluster_6046	0	0
TU	TU01	1	cluster_6048	0	0
TU	TU01	1	cluster_6050	0	0
TU	TU01	1	cluster_6061	0	0
TU	TU01	1	cluster_6066	0	0
TU	TU01	1	cluster_6072	2	0.001495
TU	TU01	1	cluster_6073	3	0.002243
TU	TU01	1	cluster_6077	0	0
TU	TU01	1	cluster_6103	0	0
TU	TU01	1	cluster_6114	0	0
TU	TU01	1	cluster_6140	0	0
TU	TU01	1	cluster_6143	0	0
TU	TU01	1	cluster_6147	0	0
TU	TU01	1	cluster_6149	0	0
TU	TU01	1	cluster_6172	0	0
TU	TU01	1	cluster_6185	0	0
TU	TU01	1	cluster_6192	0	0
TU	TU01	1	cluster_6194	0	0
TU	TU01	1	cluster_6195	0	0
TU	TU01	1	cluster_6196	0	0
TU	TU01	1	cluster_6210	0	0
TU	TU01	1	cluster_6212	4	0.002991
TU	TU01	1	cluster_6213	0	0
TU	TU01	1	cluster_6214	0	0
TU	TU01	1	cluster_6215	6	0.004487
TU	TU01	1	cluster_6216	1	0.000747
TU	TU01	1	cluster_6220	0	0
TU	TU01	1	cluster_6225	4	0.002991
TU	TU01	1	cluster_6226	0	0
TU	TU01	1	cluster_6227	0	0
TU	TU01	1	cluster_6228	0	0
TU	TU01	1	cluster_6231	13	0.009723
TU	TU01	1	cluster_6236	0	0
TU	TU01	1	cluster_6262	0	0
TU	TU01	1	cluster_6266	0	0
TU	TU01	1	cluster_6268	0	0
TU	TU01	1	cluster_6273	0	0
TU	TU01	1	cluster_6276n	0	0
TU	TU01	1	cluster_6280	0	0
TU	TU01	1	cluster_6282	21	0.015706
TU	TU01	1	cluster_6287	0	0
TU	TU01	1	cluster_6296	0	0
TU	TU01	1	cluster_6300	0	0
TU	TU01	1	cluster_6303	0	0
TU	TU01	1	cluster_6308	1	0.000747
TU	TU01	1	cluster_6310	0	0
TU	TU01	1	cluster_6311	0	0
TU	TU01	1	cluster_6317	0	0
TU	TU01	1	cluster_6321	0	0
TU	TU01	1	cluster_6328	0	0
TU	TU01	1	cluster_6329	0	0
TU	TU01	1	cluster_6331n	0	0
TU	TU01	1	cluster_6332	0	0
TU	TU01	1	cluster_6339	0	0
TU	TU01	1	cluster_6341	3	0.002243
TU	TU01	1	cluster_6342	0	0
TU	TU01	1	cluster_6343	0	0
TU	TU01	1	cluster_6347	0	0
TU	TU01	1	cluster_6351	0	0
TU	TU01	1	cluster_6355	0	0
TU	TU01	1	cluster_6369	0	0
TU	TU01	1	cluster_6371	0	0
TU	TU01	1	cluster_6373	2	0.001495
TU	TU01	1	cluster_6374	0	0
TU	TU01	1	cluster_6376	0	0
TU	TU01	1	cluster_6377	0	0
TU	TU01	1	cluster_6379	6	0.004487
TU	TU01	1	cluster_6390	0	0
TU	TU01	1	cluster_6393	0	0
TU	TU01	1	cluster_6394	0	0
TU	TU01	1	cluster_6397	0	0
TU	TU01	1	cluster_6399	0	0
TU	TU01	1	cluster_6500	0	0
TU	TU01	1	cluster_6502	2	0.001495
TU	TU01	1	cluster_6503	7	0.005235
TU	TU01	1	cluster_6504	1	0.000747
TU	TU01	1	cluster_6507	0	0
TU	TU01	1	cluster_6509	4	0.002991
TU	TU01	1	cluster_6510	0	0
TU	TU01	1	cluster_6515	0	0
TU	TU01	1	cluster_6517	0	0
TU	TU01	1	cluster_6525	0	0
TU	TU01	1	cluster_6531	2	0.001495
TU	TU01	1	cluster_6535	0	0
TU	TU01	1	cluster_6540	0	0
TU	TU01	1	cluster_6541	0	0
TU	TU01	1	cluster_6544	0	0
TU	TU01	1	cluster_6561	2	0.001495
TU	TU01	1	cluster_6564	2	0.001495
TU	TU01	1	cluster_6565	0	0
TU	TU01	1	cluster_6575	0	0
TU	TU01	1	cluster_6576	0	0
TU	TU01	1	cluster_6591n	0	0
TU	TU01	1	cluster_6598	0	0
TU	TU01	1	cluster_6599	0	0
TU	TU01	1	cluster_6602	0	0
TU	TU01	1	cluster_6605	0	0
TU	TU01	1	cluster_6617	0	0
TU	TU01	1	cluster_6619	2	0.001495
TU	TU01	1	cluster_6642	0	0
TU	TU01	1	cluster_6643	1	0.000747
TU	TU01	1	cluster_6656	0	0
TU	TU01	1	cluster_6658	4	0.002991
TU	TU01	1	cluster_6662	2	0.001495
TU	TU01	1	cluster_6663	0	0
TU	TU01	1	cluster_6667	0	0
TU	TU01	1	cluster_6667n	0	0
TU	TU01	1	cluster_6669	0	0
TU	TU01	1	cluster_6672	0	0
TU	TU01	1	cluster_6674	0	0
TU	TU01	1	cluster_6676	0	0
TU	TU01	1	cluster_6682	0	0
TU	TU01	1	cluster_6685	0	0
TU	TU01	1	cluster_6689	2	0.001495
TU	TU01	1	cluster_6690	0	0
TU	TU01	1	cluster_6693	0	0
TU	TU01	1	cluster_6694	0	0
TU	TU01	1	cluster_6695	0	0
TU	TU01	1	cluster_6698	1	0.000747
TU	TU01	1	cluster_6699	0	0
TU	TU01	1	cluster_6705	0	0
TU	TU01	1	cluster_6708	0	0
TU	TU01	1	cluster_6712	0	0
TU	TU01	1	cluster_6714	0	0
TU	TU01	1	cluster_6717	0	0
TU	TU01	1	cluster_6718	4	0.002991
TU	TU01	1	cluster_6723	0	0
TU	TU01	1	cluster_6726	3	0.002243
TU	TU01	1	cluster_6730	0	0
TU	TU01	1	cluster_6735	0	0
TU	TU01	1	cluster_6737	0	0
TU	TU01	1	cluster_6738	0	0
TU	TU01	1	cluster_6739	0	0
TU	TU01	1	cluster_6743	0	0
TU	TU01	1	cluster_6744	0	0
TU	TU01	1	cluster_6745	0	0
TU	TU01	1	cluster_6749	0	0
TU	TU01	1	cluster_6750	0	0
TU	TU01	1	cluster_6753	0	0
TU	TU01	1	cluster_6760	10	0.007479
TU	TU01	1	cluster_6767	5	0.003739
TU	TU01	1	cluster_6769	0	0
TU	TU01	1	cluster_6770	0	0
TU	TU01	1	cluster_6779	0	0
TU	TU01	1	cluster_6780	4	0.002991
TU	TU01	1	cluster_6782	0	0
TU	TU01	1	cluster_6784	0	0
TU	TU01	1	cluster_6788	0	0
TU	TU01	1	cluster_6792	2	0.001495
TU	TU01	1	cluster_6793	1	0.000747
TU	TU01	1	cluster_6794	0	0
TU	TU01	1	cluster_6795	0	0
TU	TU01	1	cluster_6799	0	0
TU	TU01	1	cluster_6803	6	0.004487
TU	TU01	1	cluster_6805	0	0
TU	TU01	1	cluster_6815	0	0
TU	TU01	1	cluster_6817	0	0
TU	TU01	1	cluster_6818	0	0
TU	TU01	1	cluster_6827	0	0
TU	TU01	1	cluster_6829	1	0.000747
TU	TU01	1	cluster_6849	11	0.008227
TU	TU01	1	cluster_6855	0	0
TU	TU01	1	cluster_6860	0	0
TU	TU01	1	cluster_6867	0	0
TU	TU01	1	cluster_6874	0	0
TU	TU01	1	cluster_6880	0	0
TU	TU01	1	cluster_6882	0	0
TU	TU01	1	cluster_6889	0	0
TU	TU01	1	cluster_6900	0	0
TU	TU01	1	cluster_6901	0	0
TU	TU01	1	cluster_6902	0	0
TU	TU01	1	cluster_6909	0	0
TU	TU01	1	cluster_6912n	0	0
TU	TU01	1	cluster_6921	0	0
TU	TU01	1	cluster_6935	3	0.002243
TU	TU01	1	cluster_6942	0	0
TU	TU01	1	cluster_6951	0	0
TU	TU01	1	cluster_6978	0	0
TU	TU01	1	cluster_6981	18	0.013462
TU	TU01	1	cluster_6992	0	0
TU	TU01	1	cluster_6997	0	0
TU	TU01	1	cluster_6999	0	0
TU	TU01	1	cluster_7103	0	0
TU	TU01	1	cluster_7107	0	0
TU	TU01	1	cluster_7108	0	0
TU	TU01	1	cluster_7111	0	0
TU	TU01	1	cluster_7117	0	0
TU	TU01	1	cluster_7122	0	0
TU	TU01	1	cluster_7124	0	0
TU	TU01	1	cluster_7132	0	0
TU	TU01	1	cluster_7134	0	0
TU	TU01	1	cluster_7138	1	0.000747
TU	TU01	1	cluster_7156	0	0
TU	TU01	1	cluster_7161	0	0
TU	TU01	1	cluster_7174	0	0
TU	TU01	1	cluster_7194	0	0
TU	TU01	1	cluster_7199	0	0
TU	TU01	1	cluster_7202	0	0
TU	TU01	1	cluster_7204	0	0
TU	TU01	1	cluster_7208	0	0
TU	TU01	1	cluster_7217	0	0
TU	TU01	1	cluster_7222	0	0
TU	TU01	1	cluster_7225	0	0
TU	TU01	1	cluster_7241	1	0.000747
TU	TU01	1	cluster_7242	6	0.004487
TU	TU01	1	cluster_7243	0	0
TU	TU01	1	cluster_7245	11	0.008227
TU	TU01	1	cluster_7246	0	0
TU	TU01	1	cluster_7247	0	0
TU	TU01	1	cluster_7248	0	0
TU	TU01	1	cluster_7250	0	0
TU	TU01	1	cluster_7251	0	0
TU	TU01	1	cluster_7256	11	0.008227
TU	TU01	1	cluster_7257	0	0
TU	TU01	1	cluster_7258	0	0
TU	TU01	1	cluster_7259	0	0
TU	TU01	1	cluster_7260	0	0
TU	TU01	1	cluster_7261	0	0
TU	TU01	1	cluster_7262	6	0.004487
TU	TU01	1	cluster_7268	0	0
TU	TU01	1	cluster_7269	0	0
TU	TU01	1	cluster_7273	0	0
TU	TU01	1	cluster_7279	0	0
TU	TU01	1	cluster_7280	0	0
TU	TU01	1	cluster_7281	2	0.001495
TU	TU01	1	cluster_7282	0	0
TU	TU01	1	cluster_7283	0	0
TU	TU01	1	cluster_7288	0	0
TU	TU01	1	cluster_7289	0	0
TU	TU01	1	cluster_7291	0	0
TU	TU01	1	cluster_7292	0	0
TU	TU01	1	cluster_7297	0	0
TU	TU01	1	cluster_7298	0	0
TU	TU01	1	cluster_7299	0	0
TU	TU01	1	cluster_7305	0	0
TU	TU01	1	cluster_7307	0	0
TU	TU01	1	cluster_7308	0	0
TU	TU01	1	cluster_7311	3	0.002243
TU	TU01	1	cluster_7312	0	0
TU	TU01	1	cluster_7314	0	0
TU	TU01	1	cluster_7315	0	0
TU	TU01	1	cluster_7316	0	0
TU	TU01	1	cluster_7322	0	0
TU	TU01	1	cluster_7326	0	0
TU	TU01	1	cluster_7329	1	0.000747
TU	TU01	1	cluster_7330	0	0
TU	TU01	1	cluster_7331	1	0.000747
TU	TU01	1	cluster_7332	9	0.006731
TU	TU01	1	cluster_7333	0	0
TU	TU01	1	cluster_7337	3	0.002243
TU	TU01	1	cluster_7338	3	0.002243
TU	TU01	1	cluster_7339	0	0
TU	TU01	1	cluster_7340	0	0
TU	TU01	1	cluster_7342	0	0
TU	TU01	1	cluster_7344	3	0.002243
TU	TU01	1	cluster_7347	0	0
TU	TU01	1	cluster_7348	0	0
TU	TU01	1	cluster_7349	0	0
TU	TU01	1	cluster_7351	0	0
TU	TU01	1	cluster_7354	2	0.001495
TU	TU01	1	cluster_7359	0	0
TU	TU01	1	cluster_7362	0	0
TU	TU01	1	cluster_7363	0	0
TU	TU01	1	cluster_7365	0	0
TU	TU01	1	cluster_7367	0	0
TU	TU01	1	cluster_7373	0	0
TU	TU01	1	cluster_7374	0	0
TU	TU01	1	cluster_7375	0	0
TU	TU01	1	cluster_7376	2	0.001495
TU	TU01	1	cluster_7377	6	0.004487
TU	TU01	1	cluster_7382	0	0
TU	TU01	1	cluster_7384	0	0
TU	TU01	1	cluster_7385	5	0.003739
TU	TU01	1	cluster_7388	0	0
TU	TU01	1	cluster_7391	0	0
TU	TU01	1	cluster_7394	0	0
TU	TU01	1	cluster_7397	1	0.000747
TU	TU01	1	cluster_7398	0	0
TU	TU01	1	cluster_7399	0	0
TU	TU01	1	cluster_7411	0	0
TU	TU01	1	cluster_7415	0	0
TU	TU01	1	cluster_7418	0	0
TU	TU01	1	cluster_7420	0	0
TU	TU01	1	cluster_7421	0	0
TU	TU01	1	cluster_7423	0	0
TU	TU01	1	cluster_7433	0	0
TU	TU01	1	cluster_7434	1	0.000747
TU	TU01	1	cluster_7436	2	0.001495
TU	TU01	1	cluster_7438	1	0.000747
TU	TU01	1	cluster_7440	0	0
TU	TU01	1	cluster_7442	0	0
TU	TU01	1	cluster_7446	0	0
TU	TU01	1	cluster_7448	0	0
TU	TU01	1	cluster_7452	0	0
TU	TU01	1	cluster_7455	0	0
TU	TU01	1	cluster_7457	6	0.004487
TU	TU01	1	cluster_7458	1	0.000747
TU	TU01	1	cluster_7463	0	0
TU	TU01	1	cluster_7464	0	0
TU	TU01	1	cluster_7467	0	0
TU	TU01	1	cluster_7470	0	0
TU	TU01	1	cluster_7472	0	0
TU	TU01	1	cluster_7474	2	0.001495
TU	TU01	1	cluster_7477	0	0
TU	TU01	1	cluster_7479	0	0
TU	TU01	1	cluster_7486	0	0
TU	TU01	1	cluster_7488	0	0
TU	TU01	1	cluster_7491	0	0
TU	TU01	1	cluster_7497	24	0.01795
TU	TU01	1	cluster_7505	2	0.001495
TU	TU01	1	cluster_7506	0	0
TU	TU01	1	cluster_7508	0	0
TU	TU01	1	cluster_7511	0	0
TU	TU01	1	cluster_7515	0	0
TU	TU01	1	cluster_7518	4	0.002991
TU	TU01	1	cluster_7520	0	0
TU	TU01	1	cluster_7522	2	0.001495
TU	TU01	1	cluster_7526	0	0
TU	TU01	1	cluster_7531	0	0
TU	TU01	1	cluster_7534	0	0
TU	TU01	1	cluster_7536	0	0
TU	TU01	1	cluster_7539	0	0
TU	TU01	1	cluster_7551	0	0
TU	TU01	1	cluster_7553	0	0
TU	TU01	1	cluster_7554	0	0
TU	TU01	1	cluster_7556	0	0
TU	TU01	1	cluster_7569	0	0
TU	TU01	1	cluster_7570	0	0
TU	TU01	1	cluster_7576	0	0
TU	TU01	1	cluster_7580	0	0
TU	TU01	1	cluster_7581	0	0
TU	TU01	1	cluster_7583	0	0
TU	TU01	1	cluster_7584	0	0
TU	TU01	1	cluster_7585	4	0.002991
TU	TU01	1	cluster_7588	0	0
TU	TU01	1	cluster_7589	0	0
TU	TU01	1	cluster_7594	0	0
TU	TU01	1	cluster_7601	0	0
TU	TU01	1	cluster_7619	0	0
TU	TU01	1	cluster_7624	1	0.000747
TU	TU01	1	cluster_7625	0	0
TU	TU01	1	cluster_7629	0	0
TU	TU01	1	cluster_7630	0	0
TU	TU01	1	cluster_7633	0	0
TU	TU01	1	cluster_7634	2	0.001495
TU	TU01	1	cluster_7639	0	0
TU	TU01	1	cluster_7640	0	0
TU	TU01	1	cluster_7642	0	0
TU	TU01	1	cluster_7644	0	0
TU	TU01	1	cluster_7645	5	0.003739
TU	TU01	1	cluster_7649	0	0
TU	TU01	1	cluster_7665	0	0
TU	TU01	1	cluster_7670	0	0
TU	TU01	1	cluster_7689	0	0
TU	TU01	1	cluster_7698	0	0
TU	TU01	1	cluster_7708	0	0
TU	TU01	1	cluster_7716	0	0
TU	TU01	1	cluster_7718	0	0
TU	TU01	1	cluster_7722	0	0
TU	TU01	1	cluster_7731	0	0
TU	TU01	1	cluster_7738	0	0
TU	TU01	1	cluster_7742	0	0
TU	TU01	1	cluster_7746	0	0
TU	TU01	1	cluster_7757	0	0
TU	TU01	1	cluster_7771	0	0
TU	TU01	1	cluster_7774	0	0
TU	TU01	1	cluster_7776	0	0
TU	TU01	1	cluster_7781	0	0
TU	TU01	1	cluster_7785	0	0
TU	TU01	1	cluster_7790	0	0
TU	TU01	1	cluster_7804	0	0
TU	TU01	1	cluster_7806	1	0.000747
TU	TU01	1	cluster_7826	0	0
TU	TU01	1	cluster_7834	1	0.000747
TU	TU01	1	cluster_7838	0	0
TU	TU01	1	cluster_7847	0	0
TU	TU01	1	cluster_7851	2	0.001495
TU	TU01	1	cluster_7867	0	0
TU	TU01	1	cluster_7873	0	0
TU	TU01	1	cluster_7890	0	0
TU	TU01	1	cluster_7897	5	0.003739
TU	TU01	1	cluster_7903	0	0
TU	TU01	1	cluster_7906	0	0
TU	TU01	1	cluster_7908	0	0
TU	TU01	1	cluster_7919	0	0
TU	TU01	1	cluster_7926	0	0
TU	TU01	1	cluster_7940	1	0.000747
TU	TU01	1	cluster_7941	7	0.005235
TU	TU01	1	cluster_7942	0	0
TU	TU01	1	cluster_7959	3	0.002243
TU	TU01	1	cluster_7994	0	0
TU	TU01	1	cluster_7996	0	0
TU	TU01	1	cluster_7997	28	0.020942
TU	TU01	1	cluster_8001	0	0
TU	TU01	1	cluster_8002	2	0.001495
TU	TU01	1	cluster_8007	0	0
TU	TU01	1	cluster_8012	0	0
TU	TU01	1	cluster_8020	0	0
TU	TU01	1	cluster_8021	0	0
TU	TU01	1	cluster_8023	0	0
TU	TU01	1	cluster_8036	0	0
TU	TU01	1	cluster_8038	0	0
TU	TU01	1	cluster_8053	0	0
TU	TU01	1	cluster_8069	0	0
TU	TU01	1	cluster_8070	0	0
TU	TU01	1	cluster_8073	0	0
TU	TU01	1	cluster_8075	0	0
TU	TU01	1	cluster_8089	0	0
TU	TU01	1	cluster_8094	0	0
TU	TU01	1	cluster_8095	0	0
TU	TU01	1	cluster_8313n	0	0
TU	TU01	1	cluster_8320	0	0
TU	TU01	1	cluster_8331	0	0
TU	TU01	1	cluster_8339	5	0.003739
TU	TU01	1	cluster_8344	0	0
TU	TU01	1	cluster_8360	4	0.002991
TU	TU01	1	cluster_8364	0	0
TU	TU01	1	cluster_8376	0	0
TU	TU01	1	cluster_8386	0	0
TU	TU01	1	cluster_8390	0	0
TU	TU01	1	cluster_8394	0	0
TU	TU01	1	cluster_8397	0	0
TU	TU01	1	cluster_8414	0	0
TU	TU01	1	cluster_8416	0	0
TU	TU01	1	cluster_8428	8	0.005983
TU	TU01	1	cluster_8448	0	0
TU	TU01	1	cluster_8450	0	0
TU	TU01	1	cluster_8457	0	0
TU	TU01	1	cluster_8465	0	0
TU	TU01	1	cluster_8471	0	0
TU	TU01	1	cluster_8479	0	0
TU	TU01	1	cluster_8481	0	0
TU	TU01	1	cluster_8485	0	0
TU	TU01	1	cluster_8486	0	0
TU	TU01	1	cluster_8487	5	0.003739
TU	TU01	1	cluster_8491n	0	0
TU	TU01	1	cluster_8512	0	0
TU	TU01	1	cluster_8513	12	0.008975
TU	TU01	1	cluster_8518	15	0.011219
TU	TU01	1	cluster_8527	2	0.001495
TU	TU01	1	cluster_8536	0	0
TU	TU01	1	cluster_8538	0	0
TU	TU01	1	cluster_8565	0	0
TU	TU01	1	cluster_8567	0	0
TU	TU01	1	cluster_8591	0	0
TU	TU01	1	cluster_8593	0	0
TU	TU01	1	cluster_8622n	0	0
TU	TU01	1	cluster_8625	0	0
TU	TU01	1	cluster_8644	0	0
TU	TU01	1	cluster_8663	0	0
TU	TU01	1	cluster_8669	0	0
TU	TU01	1	cluster_8688n	0	0
TU	TU01	1	cluster_8696	0	0
TU	TU01	1	cluster_8721	0	0
TU	TU01	1	cluster_8744	0	0
TU	TU01	1	cluster_8746	0	0
TU	TU01	1	cluster_8754	0	0
TU	TU01	1	cluster_8760	0	0
TU	TU01	1	cluster_8763	0	0
TU	TU01	1	cluster_8771	0	0
TU	TU01	1	cluster_8791	0	0
TU	TU01	1	cluster_8792	0	0
TU	TU01	1	cluster_8901	0	0
TU	TU01	1	cluster_8922	0	0
TU	TU01	1	cluster_8942	4	0.002991
TU	TU01	1	cluster_8945	0	0
TU	TU01	1	cluster_8948	0	0
TU	TU01	1	cluster_8999	0	0
TU	TU01	1	cluster_9016	0	0
TU	TU01	1	cluster_9044n	0	0
TU	TU01	1	cluster_9052	1	0.000747
TU	TU01	1	cluster_9101	0	0
TU	TU01	1	cluster_9102	0	0
TU	TU01	1	cluster_9110	0	0
TU	TU01	1	cluster_9112	0	0
TU	TU01	1	cluster_9130	0	0
TU	TU01	1	cluster_9137	0	0
TU	TU01	1	cluster_9163	0	0
TU	TU01	1	cluster_9174	0	0
TU	TU01	1	cluster_9195	0	0
TU	TU01	1	cluster_9213	0	0
TU	TU01	1	cluster_9255	0	0
TU	TU01	1	cluster_9259	0	0
TU	TU01	1	cluster_9267	4	0.002991
TU	TU01	1	cluster_9269	0	0
TU	TU01	1	cluster_9279	0	0
TU	TU01	1	cluster_9293	0	0
TU	TU01	1	cluster_9304	0	0
TU	TU01	1	cluster_9316	0	0
TU	TU01	1	cluster_9342	0	0
TU	TU01	1	cluster_9343n	0	0
TU	TU01	1	cluster_9346	0	0
TU	TU01	1	cluster_9360n	0	0
TU	TU01	1	cluster_9368	0	0
TU	TU01	1	cluster_9374	12	0.008975
TU	TU01	1	cluster_9376	0	0
TU	TU01	1	cluster_9380	0	0
TU	TU01	1	cluster_9394	0	0
TU	TU01	1	cluster_9395	1	0.000747
TU	TU01	1	cluster_9399	0	0
TU	TU01	1	cluster_9427	0	0
TU	TU01	1	cluster_9429	8	0.005983
TU	TU01	1	cluster_9440	0	0
TU	TU01	1	cluster_9447	0	0
TU	TU01	1	cluster_9462	0	0
TU	TU01	1	cluster_9465	0	0
TU	TU01	1	cluster_9475	0	0
TU	TU01	1	cluster_9476	0	0
TU	TU01	1	cluster_9487n	0	0
TU	TU01	1	cluster_9509	0	0
TU	TU01	1	cluster_9511	0	0
TU	TU01	1	cluster_9513n	0	0
TU	TU01	1	cluster_9524	0	0
TU	TU01	1	cluster_9526	3	0.002243
TU	TU01	1	cluster_9529	0	0
TU	TU01	1	cluster_9530	0	0
TU	TU01	1	cluster_9566	0	0
TU	TU01	1	cluster_9571	0	0
TU	TU01	1	cluster_9587n	0	0
TU	TU01	1	cluster_9606	0	0
TU	TU01	1	cluster_9615	2	0.001495
TU	TU01	1	cluster_9628	6	0.004487
TU	TU01	1	cluster_9659	0	0
TU	TU01	1	cluster_9698	0	0
TU	TU01	1	cluster_9704	0	0
TU	TU01	1	cluster_9709	0	0
TU	TU01	1	cluster_9726	0	0
TU	TU01	1	cluster_9733	0	0
TU	TU01	1	cluster_9741	0	0
TU	TU01	1	cluster_9758	0	0
TU	TU01	1	cluster_9759	0	0
TU	TU01	1	cluster_9762	14	0.010471
TU	TU01	1	cluster_9789n	0	0
TU	TU01	1	cluster_9793	0	0
TU	TU01	1	cluster_9800	0	0
TU	TU01	1	cluster_9818	0	0
TU	TU01	1	cluster_9830	0	0
TU	TU01	1	cluster_9867	0	0
TU	TU01	1	cluster_9899	0	0
TU	TU01	1	cluster_10304n	0	0
TU	TU01	1	cluster_10564n	0	0
TU	TU01	1	cluster_10832n	0	0
TU	TU01	1	cluster_10885n	0	0
TU	TU01	1	cluster_10972n	0	0
TU	TU01	1	cluster_11100n	0	0
TU	TU01	1	cluster_11343n	0	0
TU	TU01	1	cluster_11928n	0	0
TU	TU01	1	cluster_12382n	0	0
TU	TU01	1	cluster_12488n	0	0
TU	TU01	1	cluster_12665n	12	0.008975
TU	TU01	1	cluster_12888n	0	0
TU	TU01	1	cluster_13935n	18	0.013462
TU	TU01	1	cluster_14033n	0	0
TU	TU01	1	cluster_14232n	0	0
TU	TU01	1	cluster_14521n	19	0.01421
TU	TU01	1	cluster_14594n	0	0
TU	TU01	1	cluster_14678n	0	0
TU	TU01	1	cluster_14782n	0	0
TU	TU01	1	cluster_14830n	0	0
TU	TU01	1	cluster_15435n	0	0
TU	TU01	1	cluster_15445n	1	0.000747
TU	TU01	1	cluster_15796n	0	0
TU	TU01	1	cluster_16163n	0	0
TU	TU01	1	cluster_16200n	0	0
TU	TU01	1	cluster_16261n	0	0
TU	TU01	1	cluster_16304n	0	0
TU	TU01	1	cluster_16352n	0	0
TU	TU01	1	cluster_16494n	0	0
TU	TU01	1	cluster_16521n	0	0
TU	TU01	1	cluster_16568n	0	0
TU	TU01	1	cluster_16657n	0	0
TU	TU01	1	cluster_16704n	0	0
TU	TU01	1	cluster_16803n	0	0
TU	TU01	1	cluster_17071n	0	0
TU	TU01	1	cluster_17091n	0	0
TU	TU01	1	cluster_17119n	0	0
TU	TU01	1	cluster_17204n	0	0
TU	TU01	1	cluster_17318n	0	0
TU	TU01	1	cluster_17431n	0	0
TU	TU01	1	cluster_17652n	12	0.008975
TU	TU01	1	cluster_17716n	2	0.001495
TU	TU01	1	cluster_17903n	6	0.004487
TU	TU01	1	cluster_18015n	0	0
TU	TU01	1	cluster_18381n	0	0
TU	TU01	1	cluster_18614n	0	0
TU	TU01	1	cluster_18676n	0	0
TU	TU01	1	cluster_18718n	0	0
TU	TU01	1	cluster_19158n	0	0
TU	TU01	1	cluster_19392n	0	0
TU	TU01	1	cluster_19499n	15	0.011219
TU	TU01	1	cluster_19600n	0	0
TU	TU01	1	cluster_20106n	0	0
TU	TU01	1	cluster_20333n	1	0.000747
TU	TU01	1	cluster_20405n	0	0
TU	TU01	1	cluster_20433n	0	0
TU	TU01	1	cluster_21045n	0	0
TU	TU01	1	cluster_21278n	21	0.015706
TU	TU01	1	cluster_21365n	11	0.008227
TU	TU01	1	cluster_21656n	0	0
TU	TU01	1	cluster_21910n	0	0
TU	TU01	1	cluster_22177n	0	0
TU	TU01	1	cluster_22212n	0	0
TU	TU01	1	cluster_22565n	0	0
TU	TU01	1	cluster_22800n	0	0
TU	TU01	1	cluster_22814n	0	0
TU	TU01	1	cluster_23097n	0	0
TU	TU01	1	cluster_23166n	0	0
TU	TU01	1	cluster_23194n	0	0
TU	TU01	1	cluster_23270n	15	0.011219
TU	TU01	1	cluster_23583n	0	0
TU	TU01	1	cluster_24371n	0	0
TU	TU01	1	cluster_24588n	0	0
TU	TU01	1	cluster_24818n	0	0
TU	TU01	1	cluster_24883n	0	0
TU	TU01	1	cluster_24922n	0	0
TU	TU01	1	cluster_25009n	0	0
TU	TU01	1	cluster_25120n	0	0
TU	TU01	1	cluster_25340n	0	0
TU	TU01	1	cluster_25517n	4	0.002991
TU	TU01	1	cluster_25831n	6	0.004487
TU	TU01	1	cluster_25881n	0	0
TU	TU01	1	cluster_25957n	1	0.000747
TU	TU01	1	cluster_26319n	19	0.01421
TU	TU01	1	cluster_27008n	0	0
TU	TU01	1	cluster_27052n	10	0.007479
TU	TU01	1	cluster_27398n	0	0
TU	TU01	1	cluster_27558n	0	0
TU	TU01	1	cluster_27880n	0	0
TU	TU01	1	cluster_28838n	0	0
TU	TU01	1	cluster_28864n	0	0
TU	TU01	1	cluster_28973n	0	0
TU	TU01	1	cluster_29195n	0	0
TU	TU01	1	cluster_29278n	0	0
TU	TU01	1	cluster_29341n	0	0
TU	TU01	1	cluster_29354n	0	0
TU	TU01	1	cluster_29366n	0	0
TU	TU01	1	cluster_29533n	0	0
TU	TU01	1	cluster_29552n	0	0
TU	TU01	1	cluster_30010n	2	0.001495
TU	TU01	1	cluster_30265n	0	0
TU	TU01	1	cluster_30267n	0	0
TU	TU01	1	cluster_30424n	0	0
TU	TU01	1	cluster_30459n	6	0.004487
TU	TU01	1	cluster_30760n	0	0
TU	TU01	1	cluster_30845n	0	0
TU	TU01	1	cluster_31045n	0	0
TU	TU01	1	cluster_31105n	0	0
TU	TU01	1	cluster_31171n	0	0
TU	TU01	1	cluster_31189n	24	0.01795
TU	TU01	1	cluster_31229n	0	0
TU	TU01	1	cluster_31305n	0	0
TU	TU01	1	cluster_31337n	0	0
TU	TU01	1	cluster_31600n	0	0
TU	TU01	1	cluster_31637n	0	0
TU	TU01	1	cluster_31694n	0	0
TU	TU01	1	cluster_31954n	0	0
TU	TU01	1	cluster_32090n	0	0
TU	TU01	1	cluster_32109n	0	0
TU	TU01	1	cluster_32154nn	0	0
TU	TU01	1	cluster_32425n	0	0
TU	TU01	1	cluster_32700n	0	0
TU	TU01	1	cluster_32817n	0	0
TU	TU01	1	cluster_32974n	0	0
TU	TU01	1	cluster_33121n	6	0.004487
TU	TU01	1	cluster_33292n	0	0
TU	TU01	1	cluster_33392n	0	0
TU	TU01	1	cluster_33566n	0	0
TU	TU01	1	cluster_34099n	8	0.005983
TU	TU01	1	cluster_34245n	0	0
TU	TU01	1	cluster_34378n	0	0
TU	TU01	1	cluster_34475n	0	0
TU	TU01	1	cluster_34649nn	0	0
TU	TU01	1	cluster_34811n	11	0.008227
TU	TU01	1	cluster_35237n	16	0.011967
TU	TU01	1	cluster_35628n	3	0.002243
TU	TU01	1	cluster_36156n	0	0
TU	TU01	1	cluster_37405n	24	0.01795
TU	TU01	1	cluster_37510n	21	0.015706
TU	TU01	1	cluster_37623n	21	0.015706
TU	TU01	1	cluster_39169n	0	0
TU	TU01	1	cluster_41420n	0	0
TU	TU01	1	cluster_42451n	0	0
TU	TU01	1	cluster_48037nn	0	0
TU	TU01	1	cluster_51788n	15	0.011219
TU	TU01	1	cluster_52104n	0	0
TU	TU01	1	cluster_53250nn	1	0.000747
TU	TU01	1	cluster_56330n	0	0
TU	TU01	1	cluster_62513nn	0	0
TU	TU02	2	cluster_3	0	0
TU	TU02	2	cluster_5	7	0.005663
TU	TU02	2	cluster_6	0	0
TU	TU02	2	cluster_24	0	0
TU	TU02	2	cluster_31	2	0.001618
TU	TU02	2	cluster_35	3	0.002427
TU	TU02	2	cluster_36	1	0.000809
TU	TU02	2	cluster_37	0	0
TU	TU02	2	cluster_39	14	0.011326
TU	TU02	2	cluster_40	0	0
TU	TU02	2	cluster_41	0	0
TU	TU02	2	cluster_42	0	0
TU	TU02	2	cluster_43	8	0.006472
TU	TU02	2	cluster_44	4	0.003236
TU	TU02	2	cluster_48	0	0
TU	TU02	2	cluster_52	0	0
TU	TU02	2	cluster_54	0	0
TU	TU02	2	cluster_57	0	0
TU	TU02	2	cluster_59	0	0
TU	TU02	2	cluster_60	0	0
TU	TU02	2	cluster_61	0	0
TU	TU02	2	cluster_62	0	0
TU	TU02	2	cluster_63	0	0
TU	TU02	2	cluster_66	0	0
TU	TU02	2	cluster_71	12	0.009708
TU	TU02	2	cluster_74	0	0
TU	TU02	2	cluster_78	0	0
TU	TU02	2	cluster_79	0	0
TU	TU02	2	cluster_85	12	0.009708
TU	TU02	2	cluster_86	0	0
TU	TU02	2	cluster_91	0	0
TU	TU02	2	cluster_92	0	0
TU	TU02	2	cluster_93	5	0.004045
TU	TU02	2	cluster_95	0	0
TU	TU02	2	cluster_96	0	0
TU	TU02	2	cluster_223	0	0
TU	TU02	2	cluster_225	6	0.004854
TU	TU02	2	cluster_231	0	0
TU	TU02	2	cluster_235	5	0.004045
TU	TU02	2	cluster_241	4	0.003236
TU	TU02	2	cluster_248	0	0
TU	TU02	2	cluster_250	0	0
TU	TU02	2	cluster_259	0	0
TU	TU02	2	cluster_263	0	0
TU	TU02	2	cluster_283	0	0
TU	TU02	2	cluster_285	1	0.000809
TU	TU02	2	cluster_288	0	0
TU	TU02	2	cluster_293	3	0.002427
TU	TU02	2	cluster_298	0	0
TU	TU02	2	cluster_311	0	0
TU	TU02	2	cluster_318	0	0
TU	TU02	2	cluster_325n	0	0
TU	TU02	2	cluster_337	0	0
TU	TU02	2	cluster_338	0	0
TU	TU02	2	cluster_339	0	0
TU	TU02	2	cluster_341	0	0
TU	TU02	2	cluster_353	0	0
TU	TU02	2	cluster_357	0	0
TU	TU02	2	cluster_360	0	0
TU	TU02	2	cluster_372	3	0.002427
TU	TU02	2	cluster_375	0	0
TU	TU02	2	cluster_380	0	0
TU	TU02	2	cluster_387	0	0
TU	TU02	2	cluster_394	0	0
TU	TU02	2	cluster_396	8	0.006472
TU	TU02	2	cluster_397	0	0
TU	TU02	2	cluster_399	0	0
TU	TU02	2	cluster_400	0	0
TU	TU02	2	cluster_403	0	0
TU	TU02	2	cluster_404	2	0.001618
TU	TU02	2	cluster_406	0	0
TU	TU02	2	cluster_411	2	0.001618
TU	TU02	2	cluster_413	9	0.007281
TU	TU02	2	cluster_414	0	0
TU	TU02	2	cluster_416	0	0
TU	TU02	2	cluster_419	0	0
TU	TU02	2	cluster_422	0	0
TU	TU02	2	cluster_423	0	0
TU	TU02	2	cluster_424	5	0.004045
TU	TU02	2	cluster_426	7	0.005663
TU	TU02	2	cluster_427	0	0
TU	TU02	2	cluster_428	0	0
TU	TU02	2	cluster_429	0	0
TU	TU02	2	cluster_431	0	0
TU	TU02	2	cluster_433	0	0
TU	TU02	2	cluster_437	0	0
TU	TU02	2	cluster_443	0	0
TU	TU02	2	cluster_446	0	0
TU	TU02	2	cluster_464	0	0
TU	TU02	2	cluster_469	0	0
TU	TU02	2	cluster_483	6	0.004854
TU	TU02	2	cluster_486	0	0
TU	TU02	2	cluster_490	0	0
TU	TU02	2	cluster_493	16	0.012944
TU	TU02	2	cluster_496	0	0
TU	TU02	2	cluster_510	3	0.002427
TU	TU02	2	cluster_512	0	0
TU	TU02	2	cluster_516	0	0
TU	TU02	2	cluster_544	7	0.005663
TU	TU02	2	cluster_558	0	0
TU	TU02	2	cluster_575	0	0
TU	TU02	2	cluster_576	0	0
TU	TU02	2	cluster_577	3	0.002427
TU	TU02	2	cluster_579	0	0
TU	TU02	2	cluster_587	0	0
TU	TU02	2	cluster_591	0	0
TU	TU02	2	cluster_592	16	0.012944
TU	TU02	2	cluster_601n	0	0
TU	TU02	2	cluster_605	0	0
TU	TU02	2	cluster_608	0	0
TU	TU02	2	cluster_612	0	0
TU	TU02	2	cluster_617	6	0.004854
TU	TU02	2	cluster_623	0	0
TU	TU02	2	cluster_627	14	0.011326
TU	TU02	2	cluster_630	11	0.008899
TU	TU02	2	cluster_632	0	0
TU	TU02	2	cluster_635	0	0
TU	TU02	2	cluster_650	0	0
TU	TU02	2	cluster_651	0	0
TU	TU02	2	cluster_652	0	0
TU	TU02	2	cluster_656	0	0
TU	TU02	2	cluster_661	0	0
TU	TU02	2	cluster_666	0	0
TU	TU02	2	cluster_671	22	0.017799
TU	TU02	2	cluster_681	12	0.009708
TU	TU02	2	cluster_684	0	0
TU	TU02	2	cluster_686	0	0
TU	TU02	2	cluster_691	0	0
TU	TU02	2	cluster_698	16	0.012944
TU	TU02	2	cluster_727	0	0
TU	TU02	2	cluster_744	0	0
TU	TU02	2	cluster_779	0	0
TU	TU02	2	cluster_790	3	0.002427
TU	TU02	2	cluster_796	7	0.005663
TU	TU02	2	cluster_805	15	0.012135
TU	TU02	2	cluster_807	0	0
TU	TU02	2	cluster_809	0	0
TU	TU02	2	cluster_844	1	0.000809
TU	TU02	2	cluster_850	5	0.004045
TU	TU02	2	cluster_862	6	0.004854
TU	TU02	2	cluster_868	0	0
TU	TU02	2	cluster_892	2	0.001618
TU	TU02	2	cluster_904	5	0.004045
TU	TU02	2	cluster_936	0	0
TU	TU02	2	cluster_946	0	0
TU	TU02	2	cluster_949	4	0.003236
TU	TU02	2	cluster_952	21	0.01699
TU	TU02	2	cluster_957	26	0.021035
TU	TU02	2	cluster_961	0	0
TU	TU02	2	cluster_962	0	0
TU	TU02	2	cluster_976	1	0.000809
TU	TU02	2	cluster_980n	18	0.014563
TU	TU02	2	cluster_986	0	0
TU	TU02	2	cluster_1009n	0	0
TU	TU02	2	cluster_1039n	4	0.003236
TU	TU02	2	cluster_1231n	0	0
TU	TU02	2	cluster_1367n	0	0
TU	TU02	2	cluster_2001	0	0
TU	TU02	2	cluster_2003	13	0.010517
TU	TU02	2	cluster_2005	0	0
TU	TU02	2	cluster_2009	0	0
TU	TU02	2	cluster_2023	0	0
TU	TU02	2	cluster_2026	0	0
TU	TU02	2	cluster_2032	0	0
TU	TU02	2	cluster_2034	0	0
TU	TU02	2	cluster_2035	0	0
TU	TU02	2	cluster_2036	0	0
TU	TU02	2	cluster_2041	0	0
TU	TU02	2	cluster_2042	0	0
TU	TU02	2	cluster_2044	0	0
TU	TU02	2	cluster_2045	0	0
TU	TU02	2	cluster_2049	0	0
TU	TU02	2	cluster_2056	0	0
TU	TU02	2	cluster_2057	0	0
TU	TU02	2	cluster_2069	0	0
TU	TU02	2	cluster_2070	0	0
TU	TU02	2	cluster_2076	0	0
TU	TU02	2	cluster_2085	0	0
TU	TU02	2	cluster_2087	0	0
TU	TU02	2	cluster_2090	0	0
TU	TU02	2	cluster_2173n	0	0
TU	TU02	2	cluster_2200	0	0
TU	TU02	2	cluster_2203	0	0
TU	TU02	2	cluster_2208	4	0.003236
TU	TU02	2	cluster_2211	0	0
TU	TU02	2	cluster_2215	0	0
TU	TU02	2	cluster_2223	0	0
TU	TU02	2	cluster_2229	0	0
TU	TU02	2	cluster_2232	0	0
TU	TU02	2	cluster_2239	2	0.001618
TU	TU02	2	cluster_2242	4	0.003236
TU	TU02	2	cluster_2244	0	0
TU	TU02	2	cluster_2255	0	0
TU	TU02	2	cluster_2271	0	0
TU	TU02	2	cluster_2272	0	0
TU	TU02	2	cluster_2276	0	0
TU	TU02	2	cluster_2282	0	0
TU	TU02	2	cluster_2284	0	0
TU	TU02	2	cluster_2287n	0	0
TU	TU02	2	cluster_2289	3	0.002427
TU	TU02	2	cluster_2299	0	0
TU	TU02	2	cluster_2300	0	0
TU	TU02	2	cluster_2304	2	0.001618
TU	TU02	2	cluster_2305	0	0
TU	TU02	2	cluster_2311	2	0.001618
TU	TU02	2	cluster_2312	0	0
TU	TU02	2	cluster_2315	7	0.005663
TU	TU02	2	cluster_2330	1	0.000809
TU	TU02	2	cluster_2333	0	0
TU	TU02	2	cluster_2334	0	0
TU	TU02	2	cluster_2335	0	0
TU	TU02	2	cluster_2339	0	0
TU	TU02	2	cluster_2342	0	0
TU	TU02	2	cluster_2349	0	0
TU	TU02	2	cluster_2354	0	0
TU	TU02	2	cluster_2356	0	0
TU	TU02	2	cluster_2370	0	0
TU	TU02	2	cluster_2391	0	0
TU	TU02	2	cluster_2392	4	0.003236
TU	TU02	2	cluster_2398	0	0
TU	TU02	2	cluster_2400	0	0
TU	TU02	2	cluster_2411	0	0
TU	TU02	2	cluster_2413	0	0
TU	TU02	2	cluster_2417	0	0
TU	TU02	2	cluster_2426	0	0
TU	TU02	2	cluster_2427	0	0
TU	TU02	2	cluster_2434	0	0
TU	TU02	2	cluster_2442	0	0
TU	TU02	2	cluster_2443	0	0
TU	TU02	2	cluster_2445	0	0
TU	TU02	2	cluster_2445n	0	0
TU	TU02	2	cluster_2447	0	0
TU	TU02	2	cluster_2466	0	0
TU	TU02	2	cluster_2471	0	0
TU	TU02	2	cluster_2481	0	0
TU	TU02	2	cluster_2487	1	0.000809
TU	TU02	2	cluster_2493	0	0
TU	TU02	2	cluster_2502	0	0
TU	TU02	2	cluster_2504	4	0.003236
TU	TU02	2	cluster_2530	0	0
TU	TU02	2	cluster_2546	1	0.000809
TU	TU02	2	cluster_2547	0	0
TU	TU02	2	cluster_2548	0	0
TU	TU02	2	cluster_2551	0	0
TU	TU02	2	cluster_2553	0	0
TU	TU02	2	cluster_2560	0	0
TU	TU02	2	cluster_2565	0	0
TU	TU02	2	cluster_2566	0	0
TU	TU02	2	cluster_2572	0	0
TU	TU02	2	cluster_2577	0	0
TU	TU02	2	cluster_2584	0	0
TU	TU02	2	cluster_2589	0	0
TU	TU02	2	cluster_2625	0	0
TU	TU02	2	cluster_2627	0	0
TU	TU02	2	cluster_2628	0	0
TU	TU02	2	cluster_2630	0	0
TU	TU02	2	cluster_2631	1	0.000809
TU	TU02	2	cluster_2632	0	0
TU	TU02	2	cluster_2636	0	0
TU	TU02	2	cluster_2637	0	0
TU	TU02	2	cluster_2648	0	0
TU	TU02	2	cluster_2655	0	0
TU	TU02	2	cluster_2659	0	0
TU	TU02	2	cluster_2673	0	0
TU	TU02	2	cluster_2815	0	0
TU	TU02	2	cluster_2833	15	0.012135
TU	TU02	2	cluster_2866	0	0
TU	TU02	2	cluster_2868	0	0
TU	TU02	2	cluster_2877	0	0
TU	TU02	2	cluster_2878n	0	0
TU	TU02	2	cluster_2879	0	0
TU	TU02	2	cluster_2886	1	0.000809
TU	TU02	2	cluster_2924	0	0
TU	TU02	2	cluster_2934	0	0
TU	TU02	2	cluster_2937	0	0
TU	TU02	2	cluster_2944n	0	0
TU	TU02	2	cluster_2945	0	0
TU	TU02	2	cluster_2992	0	0
TU	TU02	2	cluster_3041n	1	0.000809
TU	TU02	2	cluster_3100	0	0
TU	TU02	2	cluster_3108	1	0.000809
TU	TU02	2	cluster_3125	0	0
TU	TU02	2	cluster_3126	0	0
TU	TU02	2	cluster_3128	0	0
TU	TU02	2	cluster_3149	0	0
TU	TU02	2	cluster_3152	0	0
TU	TU02	2	cluster_3183	3	0.002427
TU	TU02	2	cluster_3331	0	0
TU	TU02	2	cluster_3338	0	0
TU	TU02	2	cluster_3346	0	0
TU	TU02	2	cluster_3347	0	0
TU	TU02	2	cluster_3350	0	0
TU	TU02	2	cluster_3371	0	0
TU	TU02	2	cluster_3382	0	0
TU	TU02	2	cluster_3401	0	0
TU	TU02	2	cluster_3428	0	0
TU	TU02	2	cluster_3429	0	0
TU	TU02	2	cluster_3438	0	0
TU	TU02	2	cluster_3478	8	0.006472
TU	TU02	2	cluster_3479	0	0
TU	TU02	2	cluster_3488	0	0
TU	TU02	2	cluster_3536	0	0
TU	TU02	2	cluster_3546	0	0
TU	TU02	2	cluster_3547	0	0
TU	TU02	2	cluster_3548	5	0.004045
TU	TU02	2	cluster_3553	0	0
TU	TU02	2	cluster_3556	0	0
TU	TU02	2	cluster_3564	0	0
TU	TU02	2	cluster_3566	0	0
TU	TU02	2	cluster_3595	0	0
TU	TU02	2	cluster_3602	0	0
TU	TU02	2	cluster_3605	0	0
TU	TU02	2	cluster_3633	0	0
TU	TU02	2	cluster_3645	0	0
TU	TU02	2	cluster_3662	0	0
TU	TU02	2	cluster_3690	1	0.000809
TU	TU02	2	cluster_3704	0	0
TU	TU02	2	cluster_3718	0	0
TU	TU02	2	cluster_3725	0	0
TU	TU02	2	cluster_3728	0	0
TU	TU02	2	cluster_3733	0	0
TU	TU02	2	cluster_3743	0	0
TU	TU02	2	cluster_3746	0	0
TU	TU02	2	cluster_3750	0	0
TU	TU02	2	cluster_3751	6	0.004854
TU	TU02	2	cluster_3757	0	0
TU	TU02	2	cluster_3795	0	0
TU	TU02	2	cluster_3808	0	0
TU	TU02	2	cluster_3810	0	0
TU	TU02	2	cluster_3844	0	0
TU	TU02	2	cluster_3860	0	0
TU	TU02	2	cluster_3865	0	0
TU	TU02	2	cluster_3877	0	0
TU	TU02	2	cluster_3879	0	0
TU	TU02	2	cluster_3903	0	0
TU	TU02	2	cluster_3931	3	0.002427
TU	TU02	2	cluster_3971	0	0
TU	TU02	2	cluster_3979	0	0
TU	TU02	2	cluster_3981	0	0
TU	TU02	2	cluster_3991	0	0
TU	TU02	2	cluster_4001	0	0
TU	TU02	2	cluster_4013	0	0
TU	TU02	2	cluster_4015	0	0
TU	TU02	2	cluster_4038	0	0
TU	TU02	2	cluster_4040	0	0
TU	TU02	2	cluster_4048	0	0
TU	TU02	2	cluster_4060	0	0
TU	TU02	2	cluster_4061	0	0
TU	TU02	2	cluster_4068	0	0
TU	TU02	2	cluster_4075	0	0
TU	TU02	2	cluster_4078	1	0.000809
TU	TU02	2	cluster_4087	0	0
TU	TU02	2	cluster_4112	0	0
TU	TU02	2	cluster_4127	0	0
TU	TU02	2	cluster_4132	0	0
TU	TU02	2	cluster_4136	0	0
TU	TU02	2	cluster_4144	0	0
TU	TU02	2	cluster_4163	0	0
TU	TU02	2	cluster_4170	0	0
TU	TU02	2	cluster_4174	15	0.012135
TU	TU02	2	cluster_4185	0	0
TU	TU02	2	cluster_4197	0	0
TU	TU02	2	cluster_4198	0	0
TU	TU02	2	cluster_4235	0	0
TU	TU02	2	cluster_4240	0	0
TU	TU02	2	cluster_4242	0	0
TU	TU02	2	cluster_4269	0	0
TU	TU02	2	cluster_4285	4	0.003236
TU	TU02	2	cluster_4293	0	0
TU	TU02	2	cluster_4344	0	0
TU	TU02	2	cluster_4377	0	0
TU	TU02	2	cluster_4397	0	0
TU	TU02	2	cluster_4399	0	0
TU	TU02	2	cluster_4408	0	0
TU	TU02	2	cluster_4439	0	0
TU	TU02	2	cluster_4457	0	0
TU	TU02	2	cluster_4460	0	0
TU	TU02	2	cluster_4466	0	0
TU	TU02	2	cluster_4480	0	0
TU	TU02	2	cluster_4494n	0	0
TU	TU02	2	cluster_4530n	2	0.001618
TU	TU02	2	cluster_4626	0	0
TU	TU02	2	cluster_4642	1	0.000809
TU	TU02	2	cluster_4651n	1	0.000809
TU	TU02	2	cluster_4800	0	0
TU	TU02	2	cluster_4809	0	0
TU	TU02	2	cluster_4820	0	0
TU	TU02	2	cluster_4833	4	0.003236
TU	TU02	2	cluster_4835	6	0.004854
TU	TU02	2	cluster_4864	9	0.007281
TU	TU02	2	cluster_4872	0	0
TU	TU02	2	cluster_4882	0	0
TU	TU02	2	cluster_4914	5	0.004045
TU	TU02	2	cluster_4932	0	0
TU	TU02	2	cluster_4946	0	0
TU	TU02	2	cluster_4968	0	0
TU	TU02	2	cluster_4986	0	0
TU	TU02	2	cluster_5068n	0	0
TU	TU02	2	cluster_5111	0	0
TU	TU02	2	cluster_5122	0	0
TU	TU02	2	cluster_5182	0	0
TU	TU02	2	cluster_5186	0	0
TU	TU02	2	cluster_5228	0	0
TU	TU02	2	cluster_5237	0	0
TU	TU02	2	cluster_5241	0	0
TU	TU02	2	cluster_5249	0	0
TU	TU02	2	cluster_5252	0	0
TU	TU02	2	cluster_5258	0	0
TU	TU02	2	cluster_5265	0	0
TU	TU02	2	cluster_5283	0	0
TU	TU02	2	cluster_5292	0	0
TU	TU02	2	cluster_5312	0	0
TU	TU02	2	cluster_5322	4	0.003236
TU	TU02	2	cluster_5341n	0	0
TU	TU02	2	cluster_5347	0	0
TU	TU02	2	cluster_5367	0	0
TU	TU02	2	cluster_5369	0	0
TU	TU02	2	cluster_5391	0	0
TU	TU02	2	cluster_5401	2	0.001618
TU	TU02	2	cluster_5410	1	0.000809
TU	TU02	2	cluster_5411	0	0
TU	TU02	2	cluster_5413	0	0
TU	TU02	2	cluster_5416	0	0
TU	TU02	2	cluster_5425	0	0
TU	TU02	2	cluster_5444	0	0
TU	TU02	2	cluster_5453	0	0
TU	TU02	2	cluster_5456	0	0
TU	TU02	2	cluster_5463	0	0
TU	TU02	2	cluster_5465	1	0.000809
TU	TU02	2	cluster_5469	1	0.000809
TU	TU02	2	cluster_5492	0	0
TU	TU02	2	cluster_5499	0	0
TU	TU02	2	cluster_5501	0	0
TU	TU02	2	cluster_5525	0	0
TU	TU02	2	cluster_5527	0	0
TU	TU02	2	cluster_5534	0	0
TU	TU02	2	cluster_5537	0	0
TU	TU02	2	cluster_5543	11	0.008899
TU	TU02	2	cluster_5557	0	0
TU	TU02	2	cluster_5558	0	0
TU	TU02	2	cluster_5561	0	0
TU	TU02	2	cluster_5562	1	0.000809
TU	TU02	2	cluster_5571	0	0
TU	TU02	2	cluster_5572	0	0
TU	TU02	2	cluster_5573	0	0
TU	TU02	2	cluster_5579	0	0
TU	TU02	2	cluster_5580	0	0
TU	TU02	2	cluster_5581	11	0.008899
TU	TU02	2	cluster_5582	0	0
TU	TU02	2	cluster_5590	0	0
TU	TU02	2	cluster_5592	0	0
TU	TU02	2	cluster_5595	0	0
TU	TU02	2	cluster_5598	0	0
TU	TU02	2	cluster_5599	0	0
TU	TU02	2	cluster_5600	0	0
TU	TU02	2	cluster_5606	0	0
TU	TU02	2	cluster_5608	0	0
TU	TU02	2	cluster_5610	0	0
TU	TU02	2	cluster_5615	0	0
TU	TU02	2	cluster_5622	6	0.004854
TU	TU02	2	cluster_5624	0	0
TU	TU02	2	cluster_5626	0	0
TU	TU02	2	cluster_5631	0	0
TU	TU02	2	cluster_5638	0	0
TU	TU02	2	cluster_5644	0	0
TU	TU02	2	cluster_5645	0	0
TU	TU02	2	cluster_5646	0	0
TU	TU02	2	cluster_5649	4	0.003236
TU	TU02	2	cluster_5659	0	0
TU	TU02	2	cluster_5661	1	0.000809
TU	TU02	2	cluster_5664	0	0
TU	TU02	2	cluster_5666	0	0
TU	TU02	2	cluster_5668	0	0
TU	TU02	2	cluster_5674	1	0.000809
TU	TU02	2	cluster_5685	0	0
TU	TU02	2	cluster_5687	0	0
TU	TU02	2	cluster_5702	0	0
TU	TU02	2	cluster_5723	0	0
TU	TU02	2	cluster_5725	0	0
TU	TU02	2	cluster_5728	2	0.001618
TU	TU02	2	cluster_5730	0	0
TU	TU02	2	cluster_5731	0	0
TU	TU02	2	cluster_5734	0	0
TU	TU02	2	cluster_5755	0	0
TU	TU02	2	cluster_5764	0	0
TU	TU02	2	cluster_5775	0	0
TU	TU02	2	cluster_5777	0	0
TU	TU02	2	cluster_5779	0	0
TU	TU02	2	cluster_5787	0	0
TU	TU02	2	cluster_5792	0	0
TU	TU02	2	cluster_5806	0	0
TU	TU02	2	cluster_5812	1	0.000809
TU	TU02	2	cluster_5815	10	0.00809
TU	TU02	2	cluster_5817	0	0
TU	TU02	2	cluster_5832	0	0
TU	TU02	2	cluster_5835	0	0
TU	TU02	2	cluster_5836	0	0
TU	TU02	2	cluster_5845	0	0
TU	TU02	2	cluster_5847	0	0
TU	TU02	2	cluster_5862	0	0
TU	TU02	2	cluster_5871	0	0
TU	TU02	2	cluster_5880	0	0
TU	TU02	2	cluster_5901	0	0
TU	TU02	2	cluster_5904	0	0
TU	TU02	2	cluster_5906	0	0
TU	TU02	2	cluster_5914	0	0
TU	TU02	2	cluster_5920	2	0.001618
TU	TU02	2	cluster_5928	0	0
TU	TU02	2	cluster_5958	0	0
TU	TU02	2	cluster_5960	1	0.000809
TU	TU02	2	cluster_6008	0	0
TU	TU02	2	cluster_6011	0	0
TU	TU02	2	cluster_6021	0	0
TU	TU02	2	cluster_6024	0	0
TU	TU02	2	cluster_6040	0	0
TU	TU02	2	cluster_6043	0	0
TU	TU02	2	cluster_6046	0	0
TU	TU02	2	cluster_6048	0	0
TU	TU02	2	cluster_6050	0	0
TU	TU02	2	cluster_6061	0	0
TU	TU02	2	cluster_6066	0	0
TU	TU02	2	cluster_6072	0	0
TU	TU02	2	cluster_6073	2	0.001618
TU	TU02	2	cluster_6077	0	0
TU	TU02	2	cluster_6103	0	0
TU	TU02	2	cluster_6114	0	0
TU	TU02	2	cluster_6140	0	0
TU	TU02	2	cluster_6143	0	0
TU	TU02	2	cluster_6147	0	0
TU	TU02	2	cluster_6149	0	0
TU	TU02	2	cluster_6172	0	0
TU	TU02	2	cluster_6185	0	0
TU	TU02	2	cluster_6192	0	0
TU	TU02	2	cluster_6194	0	0
TU	TU02	2	cluster_6195	0	0
TU	TU02	2	cluster_6196	0	0
TU	TU02	2	cluster_6210	0	0
TU	TU02	2	cluster_6212	10	0.00809
TU	TU02	2	cluster_6213	0	0
TU	TU02	2	cluster_6214	0	0
TU	TU02	2	cluster_6215	3	0.002427
TU	TU02	2	cluster_6216	1	0.000809
TU	TU02	2	cluster_6220	0	0
TU	TU02	2	cluster_6225	4	0.003236
TU	TU02	2	cluster_6226	0	0
TU	TU02	2	cluster_6227	0	0
TU	TU02	2	cluster_6228	0	0
TU	TU02	2	cluster_6231	2	0.001618
TU	TU02	2	cluster_6236	0	0
TU	TU02	2	cluster_6262	0	0
TU	TU02	2	cluster_6266	0	0
TU	TU02	2	cluster_6268	0	0
TU	TU02	2	cluster_6273	0	0
TU	TU02	2	cluster_6276n	0	0
TU	TU02	2	cluster_6280	0	0
TU	TU02	2	cluster_6282	8	0.006472
TU	TU02	2	cluster_6287	0	0
TU	TU02	2	cluster_6296	0	0
TU	TU02	2	cluster_6300	0	0
TU	TU02	2	cluster_6303	1	0.000809
TU	TU02	2	cluster_6308	0	0
TU	TU02	2	cluster_6310	0	0
TU	TU02	2	cluster_6311	0	0
TU	TU02	2	cluster_6317	0	0
TU	TU02	2	cluster_6321	0	0
TU	TU02	2	cluster_6328	0	0
TU	TU02	2	cluster_6329	0	0
TU	TU02	2	cluster_6331n	0	0
TU	TU02	2	cluster_6332	0	0
TU	TU02	2	cluster_6339	0	0
TU	TU02	2	cluster_6341	1	0.000809
TU	TU02	2	cluster_6342	0	0
TU	TU02	2	cluster_6343	0	0
TU	TU02	2	cluster_6347	0	0
TU	TU02	2	cluster_6351	0	0
TU	TU02	2	cluster_6355	0	0
TU	TU02	2	cluster_6369	0	0
TU	TU02	2	cluster_6371	0	0
TU	TU02	2	cluster_6373	4	0.003236
TU	TU02	2	cluster_6374	0	0
TU	TU02	2	cluster_6376	0	0
TU	TU02	2	cluster_6377	0	0
TU	TU02	2	cluster_6379	4	0.003236
TU	TU02	2	cluster_6390	0	0
TU	TU02	2	cluster_6393	0	0
TU	TU02	2	cluster_6394	0	0
TU	TU02	2	cluster_6397	0	0
TU	TU02	2	cluster_6399	0	0
TU	TU02	2	cluster_6500	0	0
TU	TU02	2	cluster_6502	2	0.001618
TU	TU02	2	cluster_6503	5	0.004045
TU	TU02	2	cluster_6504	2	0.001618
TU	TU02	2	cluster_6507	0	0
TU	TU02	2	cluster_6509	7	0.005663
TU	TU02	2	cluster_6510	0	0
TU	TU02	2	cluster_6515	0	0
TU	TU02	2	cluster_6517	0	0
TU	TU02	2	cluster_6525	0	0
TU	TU02	2	cluster_6531	1	0.000809
TU	TU02	2	cluster_6535	0	0
TU	TU02	2	cluster_6540	0	0
TU	TU02	2	cluster_6541	0	0
TU	TU02	2	cluster_6544	1	0.000809
TU	TU02	2	cluster_6561	6	0.004854
TU	TU02	2	cluster_6564	1	0.000809
TU	TU02	2	cluster_6565	0	0
TU	TU02	2	cluster_6575	0	0
TU	TU02	2	cluster_6576	0	0
TU	TU02	2	cluster_6591n	0	0
TU	TU02	2	cluster_6598	0	0
TU	TU02	2	cluster_6599	0	0
TU	TU02	2	cluster_6602	0	0
TU	TU02	2	cluster_6605	0	0
TU	TU02	2	cluster_6617	0	0
TU	TU02	2	cluster_6619	1	0.000809
TU	TU02	2	cluster_6642	0	0
TU	TU02	2	cluster_6643	0	0
TU	TU02	2	cluster_6656	2	0.001618
TU	TU02	2	cluster_6658	3	0.002427
TU	TU02	2	cluster_6662	0	0
TU	TU02	2	cluster_6663	0	0
TU	TU02	2	cluster_6667	0	0
TU	TU02	2	cluster_6667n	0	0
TU	TU02	2	cluster_6669	0	0
TU	TU02	2	cluster_6672	0	0
TU	TU02	2	cluster_6674	0	0
TU	TU02	2	cluster_6676	2	0.001618
TU	TU02	2	cluster_6682	0	0
TU	TU02	2	cluster_6685	0	0
TU	TU02	2	cluster_6689	1	0.000809
TU	TU02	2	cluster_6690	0	0
TU	TU02	2	cluster_6693	0	0
TU	TU02	2	cluster_6694	0	0
TU	TU02	2	cluster_6695	0	0
TU	TU02	2	cluster_6698	1	0.000809
TU	TU02	2	cluster_6699	0	0
TU	TU02	2	cluster_6705	0	0
TU	TU02	2	cluster_6708	0	0
TU	TU02	2	cluster_6712	0	0
TU	TU02	2	cluster_6714	0	0
TU	TU02	2	cluster_6717	0	0
TU	TU02	2	cluster_6718	8	0.006472
TU	TU02	2	cluster_6723	0	0
TU	TU02	2	cluster_6726	4	0.003236
TU	TU02	2	cluster_6730	0	0
TU	TU02	2	cluster_6735	0	0
TU	TU02	2	cluster_6737	0	0
TU	TU02	2	cluster_6738	0	0
TU	TU02	2	cluster_6739	0	0
TU	TU02	2	cluster_6743	0	0
TU	TU02	2	cluster_6744	0	0
TU	TU02	2	cluster_6745	0	0
TU	TU02	2	cluster_6749	0	0
TU	TU02	2	cluster_6750	0	0
TU	TU02	2	cluster_6753	0	0
TU	TU02	2	cluster_6760	0	0
TU	TU02	2	cluster_6767	1	0.000809
TU	TU02	2	cluster_6769	0	0
TU	TU02	2	cluster_6770	0	0
TU	TU02	2	cluster_6779	0	0
TU	TU02	2	cluster_6780	0	0
TU	TU02	2	cluster_6782	0	0
TU	TU02	2	cluster_6784	0	0
TU	TU02	2	cluster_6788	0	0
TU	TU02	2	cluster_6792	1	0.000809
TU	TU02	2	cluster_6793	0	0
TU	TU02	2	cluster_6794	0	0
TU	TU02	2	cluster_6795	0	0
TU	TU02	2	cluster_6799	0	0
TU	TU02	2	cluster_6803	12	0.009708
TU	TU02	2	cluster_6805	0	0
TU	TU02	2	cluster_6815	1	0.000809
TU	TU02	2	cluster_6817	0	0
TU	TU02	2	cluster_6818	0	0
TU	TU02	2	cluster_6827	0	0
TU	TU02	2	cluster_6829	0	0
TU	TU02	2	cluster_6849	7	0.005663
TU	TU02	2	cluster_6855	1	0.000809
TU	TU02	2	cluster_6860	0	0
TU	TU02	2	cluster_6867	0	0
TU	TU02	2	cluster_6874	0	0
TU	TU02	2	cluster_6880	0	0
TU	TU02	2	cluster_6882	0	0
TU	TU02	2	cluster_6889	0	0
TU	TU02	2	cluster_6900	0	0
TU	TU02	2	cluster_6901	0	0
TU	TU02	2	cluster_6902	0	0
TU	TU02	2	cluster_6909	0	0
TU	TU02	2	cluster_6912n	0	0
TU	TU02	2	cluster_6921	3	0.002427
TU	TU02	2	cluster_6935	3	0.002427
TU	TU02	2	cluster_6942	0	0
TU	TU02	2	cluster_6951	0	0
TU	TU02	2	cluster_6978	0	0
TU	TU02	2	cluster_6981	17	0.013754
TU	TU02	2	cluster_6992	0	0
TU	TU02	2	cluster_6997	0	0
TU	TU02	2	cluster_6999	0	0
TU	TU02	2	cluster_7103	0	0
TU	TU02	2	cluster_7107	0	0
TU	TU02	2	cluster_7108	0	0
TU	TU02	2	cluster_7111	0	0
TU	TU02	2	cluster_7117	0	0
TU	TU02	2	cluster_7122	0	0
TU	TU02	2	cluster_7124	0	0
TU	TU02	2	cluster_7132	0	0
TU	TU02	2	cluster_7134	0	0
TU	TU02	2	cluster_7138	1	0.000809
TU	TU02	2	cluster_7156	0	0
TU	TU02	2	cluster_7161	0	0
TU	TU02	2	cluster_7174	0	0
TU	TU02	2	cluster_7194	0	0
TU	TU02	2	cluster_7199	0	0
TU	TU02	2	cluster_7202	0	0
TU	TU02	2	cluster_7204	0	0
TU	TU02	2	cluster_7208	0	0
TU	TU02	2	cluster_7217	0	0
TU	TU02	2	cluster_7222	0	0
TU	TU02	2	cluster_7225	0	0
TU	TU02	2	cluster_7241	5	0.004045
TU	TU02	2	cluster_7242	5	0.004045
TU	TU02	2	cluster_7243	0	0
TU	TU02	2	cluster_7245	14	0.011326
TU	TU02	2	cluster_7246	0	0
TU	TU02	2	cluster_7247	0	0
TU	TU02	2	cluster_7248	0	0
TU	TU02	2	cluster_7250	0	0
TU	TU02	2	cluster_7251	0	0
TU	TU02	2	cluster_7256	7	0.005663
TU	TU02	2	cluster_7257	0	0
TU	TU02	2	cluster_7258	0	0
TU	TU02	2	cluster_7259	0	0
TU	TU02	2	cluster_7260	0	0
TU	TU02	2	cluster_7261	4	0.003236
TU	TU02	2	cluster_7262	11	0.008899
TU	TU02	2	cluster_7268	0	0
TU	TU02	2	cluster_7269	0	0
TU	TU02	2	cluster_7273	0	0
TU	TU02	2	cluster_7279	0	0
TU	TU02	2	cluster_7280	0	0
TU	TU02	2	cluster_7281	2	0.001618
TU	TU02	2	cluster_7282	0	0
TU	TU02	2	cluster_7283	0	0
TU	TU02	2	cluster_7288	0	0
TU	TU02	2	cluster_7289	1	0.000809
TU	TU02	2	cluster_7291	0	0
TU	TU02	2	cluster_7292	0	0
TU	TU02	2	cluster_7297	0	0
TU	TU02	2	cluster_7298	0	0
TU	TU02	2	cluster_7299	0	0
TU	TU02	2	cluster_7305	0	0
TU	TU02	2	cluster_7307	0	0
TU	TU02	2	cluster_7308	0	0
TU	TU02	2	cluster_7311	2	0.001618
TU	TU02	2	cluster_7312	0	0
TU	TU02	2	cluster_7314	0	0
TU	TU02	2	cluster_7315	0	0
TU	TU02	2	cluster_7316	0	0
TU	TU02	2	cluster_7322	0	0
TU	TU02	2	cluster_7326	0	0
TU	TU02	2	cluster_7329	4	0.003236
TU	TU02	2	cluster_7330	0	0
TU	TU02	2	cluster_7331	2	0.001618
TU	TU02	2	cluster_7332	6	0.004854
TU	TU02	2	cluster_7333	0	0
TU	TU02	2	cluster_7337	4	0.003236
TU	TU02	2	cluster_7338	4	0.003236
TU	TU02	2	cluster_7339	0	0
TU	TU02	2	cluster_7340	0	0
TU	TU02	2	cluster_7342	1	0.000809
TU	TU02	2	cluster_7344	6	0.004854
TU	TU02	2	cluster_7347	0	0
TU	TU02	2	cluster_7348	0	0
TU	TU02	2	cluster_7349	0	0
TU	TU02	2	cluster_7351	0	0
TU	TU02	2	cluster_7354	0	0
TU	TU02	2	cluster_7359	0	0
TU	TU02	2	cluster_7362	0	0
TU	TU02	2	cluster_7363	0	0
TU	TU02	2	cluster_7365	0	0
TU	TU02	2	cluster_7367	0	0
TU	TU02	2	cluster_7373	0	0
TU	TU02	2	cluster_7374	0	0
TU	TU02	2	cluster_7375	0	0
TU	TU02	2	cluster_7376	1	0.000809
TU	TU02	2	cluster_7377	9	0.007281
TU	TU02	2	cluster_7382	0	0
TU	TU02	2	cluster_7384	0	0
TU	TU02	2	cluster_7385	4	0.003236
TU	TU02	2	cluster_7388	0	0
TU	TU02	2	cluster_7391	0	0
TU	TU02	2	cluster_7394	0	0
TU	TU02	2	cluster_7397	0	0
TU	TU02	2	cluster_7398	0	0
TU	TU02	2	cluster_7399	0	0
[truncated: 63,536 more rows]

## Sheet: fig3_3wild_Ocluster_presence
orthoclusters_found	percentage_of_fish
79	0.0175439
66	0.0350877
71	0.0526316
67	0.0701754
72	0.0877193
68	0.105263
63	0.122807
56	0.140351
58	0.157895
66	0.175439
47	0.192982
52	0.210526
44	0.22807
46	0.245614
34	0.263158
48	0.280702
39	0.298246
35	0.315789
33	0.333333
33	0.350877
26	0.368421
16	0.385965
22	0.403509
24	0.421053
20	0.438596
28	0.45614
11	0.473684
16	0.491228
12	0.508772
20	0.526316
9	0.54386
21	0.561404
10	0.578947
14	0.596491
17	0.614035
17	0.631579
11	0.649123
8	0.666667
10	0.684211
8	0.701754
5	0.719298
7	0.736842
9	0.754386
8	0.77193
6	0.789474
8	0.807018
4	0.824561
3	0.842105
5	0.859649
8	0.877193
2	0.894737
7	0.912281
3	0.929825
8	0.947368
6	0.964912
2	0.982456
2	1

## Sheet: fig3_FISNACHT_presence
Population	Fish	Orthocluster	Present
TU	TU01	cluster_2	no
TU	TU02	cluster_2	no
TU	TU03	cluster_2	no
TU	TU06	cluster_2	no
TU	TU08	cluster_2	no
TU	TU10	cluster_2	no
TU	TU12	cluster_2	no
TU	TU14	cluster_2	no
CGN	CGN1	cluster_2	no
CGN	CGN2	cluster_2	no
CGN	CGN3	cluster_2	no
CGN	CGN4	cluster_2	no
CGN	CGN5	cluster_2	no
CGN	CGN6	cluster_2	no
CGN	CGN7	cluster_2	no
CGN	CGN8	cluster_2	no
DP	DP03	cluster_2	no
DP	DP05	cluster_2	no
DP	DP07	cluster_2	no
DP	DP09	cluster_2	no
DP	DP10	cluster_2	no
DP	DP12	cluster_2	no
DP	DP13	cluster_2	no
DP	DP15	cluster_2	no
DP	DP16	cluster_2	no
DP	DP20	cluster_2	no
DP	DP21	cluster_2	no
DP	DP23	cluster_2	no
DP	DP24	cluster_2	no
DP	DP25	cluster_2	no
DP	DP28	cluster_2	no
DP	DP29	cluster_2	no
DP	DP31	cluster_2	no
DP	DP32	cluster_2	no
DP	DP33	cluster_2	no
DP	DP34	cluster_2	no
KG	KG03	cluster_2	no
KG	KG05	cluster_2	no
KG	KG07	cluster_2	no
KG	KG12	cluster_2	no
KG	KG14	cluster_2	yes
KG	KG15	cluster_2	no
KG	KG18	cluster_2	no
KG	KG19	cluster_2	no
KG	KG20	cluster_2	no
KG	KG22	cluster_2	no
KG	KG24	cluster_2	no
KG	KG26	cluster_2	no
KG	KG29	cluster_2	no
KG	KG32	cluster_2	no
KG	KG33	cluster_2	no
KG	KG35	cluster_2	no
KG	KG41	cluster_2	no
KG	KG42	cluster_2	no
KG	KG43	cluster_2	no
KG	KG44	cluster_2	no
SN	SN03	cluster_2	no
SN	SN04	cluster_2	no
SN	SN08	cluster_2	no
SN	SN09	cluster_2	no
SN	SN10	cluster_2	no
SN	SN11	cluster_2	no
SN	SN12	cluster_2	no
SN	SN13	cluster_2	no
SN	SN14	cluster_2	no
SN	SN15	cluster_2	no
SN	SN16	cluster_2	no
SN	SN17	cluster_2	no
SN	SN18	cluster_2	no
SN	SN19	cluster_2	no
SN	SN20	cluster_2	no
SN	SN21	cluster_2	no
SN	SN23	cluster_2	no
SN	SN24	cluster_2	no
SN	SN26	cluster_2	no
CHT	CHT01	cluster_2	no
CHT	CHT02	cluster_2	no
CHT	CHT03	cluster_2	no
CHT	CHT04	cluster_2	no
CHT	CHT05	cluster_2	no
CHT	CHT06	cluster_2	no
CHT	CHT07	cluster_2	no
CHT	CHT08	cluster_2	no
CHT	CHT10	cluster_2	no
CHT	CHT11	cluster_2	no
CHT	CHT12	cluster_2	no
CHT	CHT14	cluster_2	no
CHT	CHT15	cluster_2	no
CHT	CHT16	cluster_2	no
CHT	CHT19	cluster_2	no
CHT	CHT23	cluster_2	no
CHT	CHT26	cluster_2	no
CHT	CHT28	cluster_2	no
TU	TU01	cluster_3	no
TU	TU02	cluster_3	no
TU	TU03	cluster_3	no
TU	TU06	cluster_3	no
TU	TU08	cluster_3	no
TU	TU10	cluster_3	no
TU	TU12	cluster_3	no
TU	TU14	cluster_3	no
CGN	CGN1	cluster_3	yes
CGN	CGN2	cluster_3	yes
CGN	CGN3	cluster_3	no
CGN	CGN4	cluster_3	yes
CGN	CGN5	cluster_3	yes
CGN	CGN6	cluster_3	yes
CGN	CGN7	cluster_3	yes
CGN	CGN8	cluster_3	yes
DP	DP03	cluster_3	no
DP	DP05	cluster_3	no
DP	DP07	cluster_3	no
DP	DP09	cluster_3	no
DP	DP10	cluster_3	no
DP	DP12	cluster_3	no
DP	DP13	cluster_3	no
DP	DP15	cluster_3	no
DP	DP16	cluster_3	no
DP	DP20	cluster_3	no
DP	DP21	cluster_3	no
DP	DP23	cluster_3	no
DP	DP24	cluster_3	no
DP	DP25	cluster_3	no
DP	DP28	cluster_3	no
DP	DP29	cluster_3	no
DP	DP31	cluster_3	no
DP	DP32	cluster_3	no
DP	DP33	cluster_3	no
DP	DP34	cluster_3	no
KG	KG03	cluster_3	no
KG	KG05	cluster_3	no
KG	KG07	cluster_3	no
KG	KG12	cluster_3	yes
KG	KG14	cluster_3	no
KG	KG15	cluster_3	yes
KG	KG18	cluster_3	no
KG	KG19	cluster_3	no
KG	KG20	cluster_3	no
KG	KG22	cluster_3	yes
KG	KG24	cluster_3	no
KG	KG26	cluster_3	no
KG	KG29	cluster_3	no
KG	KG32	cluster_3	no
KG	KG33	cluster_3	no
KG	KG35	cluster_3	no
KG	KG41	cluster_3	no
KG	KG42	cluster_3	no
KG	KG43	cluster_3	no
KG	KG44	cluster_3	no
SN	SN03	cluster_3	no
SN	SN04	cluster_3	no
SN	SN08	cluster_3	no
SN	SN09	cluster_3	yes
SN	SN10	cluster_3	no
SN	SN11	cluster_3	no
SN	SN12	cluster_3	no
SN	SN13	cluster_3	no
SN	SN14	cluster_3	no
SN	SN15	cluster_3	no
SN	SN16	cluster_3	no
SN	SN17	cluster_3	no
SN	SN18	cluster_3	no
SN	SN19	cluster_3	no
SN	SN20	cluster_3	no
SN	SN21	cluster_3	no
SN	SN23	cluster_3	no
SN	SN24	cluster_3	no
SN	SN26	cluster_3	no
CHT	CHT01	cluster_3	no
CHT	CHT02	cluster_3	no
CHT	CHT03	cluster_3	no
CHT	CHT04	cluster_3	no
CHT	CHT05	cluster_3	no
CHT	CHT06	cluster_3	no
CHT	CHT07	cluster_3	no
CHT	CHT08	cluster_3	no
CHT	CHT10	cluster_3	yes
CHT	CHT11	cluster_3	no
CHT	CHT12	cluster_3	no
CHT	CHT14	cluster_3	no
CHT	CHT15	cluster_3	no
CHT	CHT16	cluster_3	no
CHT	CHT19	cluster_3	no
CHT	CHT23	cluster_3	no
CHT	CHT26	cluster_3	no
CHT	CHT28	cluster_3	no
TU	TU01	cluster_5	yes
TU	TU02	cluster_5	yes
TU	TU03	cluster_5	yes
TU	TU06	cluster_5	yes
TU	TU08	cluster_5	yes
TU	TU10	cluster_5	yes
TU	TU12	cluster_5	no
TU	TU14	cluster_5	yes
CGN	CGN1	cluster_5	yes
CGN	CGN2	cluster_5	yes
CGN	CGN3	cluster_5	yes
CGN	CGN4	cluster_5	yes
CGN	CGN5	cluster_5	yes
CGN	CGN6	cluster_5	yes
CGN	CGN7	cluster_5	yes
CGN	CGN8	cluster_5	yes
DP	DP03	cluster_5	yes
DP	DP05	cluster_5	no
DP	DP07	cluster_5	yes
DP	DP09	cluster_5	yes
DP	DP10	cluster_5	no
DP	DP12	cluster_5	yes
DP	DP13	cluster_5	no
DP	DP15	cluster_5	yes
DP	DP16	cluster_5	yes
DP	DP20	cluster_5	no
DP	DP21	cluster_5	no
DP	DP23	cluster_5	yes
DP	DP24	cluster_5	yes
DP	DP25	cluster_5	yes
DP	DP28	cluster_5	yes
DP	DP29	cluster_5	yes
DP	DP31	cluster_5	yes
DP	DP32	cluster_5	yes
DP	DP33	cluster_5	yes
DP	DP34	cluster_5	no
KG	KG03	cluster_5	yes
KG	KG05	cluster_5	yes
KG	KG07	cluster_5	yes
KG	KG12	cluster_5	yes
KG	KG14	cluster_5	yes
KG	KG15	cluster_5	yes
KG	KG18	cluster_5	yes
KG	KG19	cluster_5	yes
KG	KG20	cluster_5	yes
KG	KG22	cluster_5	yes
KG	KG24	cluster_5	yes
KG	KG26	cluster_5	yes
KG	KG29	cluster_5	yes
KG	KG32	cluster_5	yes
KG	KG33	cluster_5	yes
KG	KG35	cluster_5	yes
KG	KG41	cluster_5	yes
KG	KG42	cluster_5	no
KG	KG43	cluster_5	yes
KG	KG44	cluster_5	yes
SN	SN03	cluster_5	yes
SN	SN04	cluster_5	yes
SN	SN08	cluster_5	yes
SN	SN09	cluster_5	yes
SN	SN10	cluster_5	yes
SN	SN11	cluster_5	yes
SN	SN12	cluster_5	yes
SN	SN13	cluster_5	yes
SN	SN14	cluster_5	yes
SN	SN15	cluster_5	yes
SN	SN16	cluster_5	yes
SN	SN17	cluster_5	yes
SN	SN18	cluster_5	yes
SN	SN19	cluster_5	yes
SN	SN20	cluster_5	yes
SN	SN21	cluster_5	yes
SN	SN23	cluster_5	yes
SN	SN24	cluster_5	yes
SN	SN26	cluster_5	yes
CHT	CHT01	cluster_5	yes
CHT	CHT02	cluster_5	yes
CHT	CHT03	cluster_5	no
CHT	CHT04	cluster_5	yes
CHT	CHT05	cluster_5	yes
CHT	CHT06	cluster_5	yes
CHT	CHT07	cluster_5	yes
CHT	CHT08	cluster_5	yes
CHT	CHT10	cluster_5	yes
CHT	CHT11	cluster_5	yes
CHT	CHT12	cluster_5	yes
CHT	CHT14	cluster_5	yes
CHT	CHT15	cluster_5	yes
CHT	CHT16	cluster_5	yes
CHT	CHT19	cluster_5	yes
CHT	CHT23	cluster_5	yes
CHT	CHT26	cluster_5	yes
CHT	CHT28	cluster_5	yes
TU	TU01	cluster_6	no
TU	TU02	cluster_6	no
TU	TU03	cluster_6	no
TU	TU06	cluster_6	no
TU	TU08	cluster_6	yes
TU	TU10	cluster_6	no
TU	TU12	cluster_6	no
TU	TU14	cluster_6	no
CGN	CGN1	cluster_6	yes
CGN	CGN2	cluster_6	yes
CGN	CGN3	cluster_6	yes
CGN	CGN4	cluster_6	yes
CGN	CGN5	cluster_6	yes
CGN	CGN6	cluster_6	yes
CGN	CGN7	cluster_6	yes
CGN	CGN8	cluster_6	yes
DP	DP03	cluster_6	no
DP	DP05	cluster_6	no
DP	DP07	cluster_6	no
DP	DP09	cluster_6	no
DP	DP10	cluster_6	no
DP	DP12	cluster_6	no
DP	DP13	cluster_6	no
DP	DP15	cluster_6	no
DP	DP16	cluster_6	no
DP	DP20	cluster_6	no
DP	DP21	cluster_6	no
DP	DP23	cluster_6	no
DP	DP24	cluster_6	no
DP	DP25	cluster_6	no
DP	DP28	cluster_6	no
DP	DP29	cluster_6	no
DP	DP31	cluster_6	no
DP	DP32	cluster_6	no
DP	DP33	cluster_6	no
DP	DP34	cluster_6	no
KG	KG03	cluster_6	no
KG	KG05	cluster_6	no
KG	KG07	cluster_6	no
KG	KG12	cluster_6	no
KG	KG14	cluster_6	no
KG	KG15	cluster_6	no
KG	KG18	cluster_6	no
KG	KG19	cluster_6	no
KG	KG20	cluster_6	no
KG	KG22	cluster_6	no
KG	KG24	cluster_6	no
KG	KG26	cluster_6	no
KG	KG29	cluster_6	no
KG	KG32	cluster_6	no
KG	KG33	cluster_6	no
KG	KG35	cluster_6	no
KG	KG41	cluster_6	no
KG	KG42	cluster_6	no
KG	KG43	cluster_6	no
KG	KG44	cluster_6	no
SN	SN03	cluster_6	no
SN	SN04	cluster_6	no
SN	SN08	cluster_6	no
SN	SN09	cluster_6	no
SN	SN10	cluster_6	no
SN	SN11	cluster_6	no
SN	SN12	cluster_6	no
SN	SN13	cluster_6	no
SN	SN14	cluster_6	no
SN	SN15	cluster_6	no
SN	SN16	cluster_6	yes
SN	SN17	cluster_6	no
SN	SN18	cluster_6	no
SN	SN19	cluster_6	no
SN	SN20	cluster_6	no
SN	SN21	cluster_6	no
SN	SN23	cluster_6	no
SN	SN24	cluster_6	no
SN	SN26	cluster_6	yes
CHT	CHT01	cluster_6	no
CHT	CHT02	cluster_6	no
CHT	CHT03	cluster_6	no
CHT	CHT04	cluster_6	no
CHT	CHT05	cluster_6	no
CHT	CHT06	cluster_6	no
CHT	CHT07	cluster_6	no
CHT	CHT08	cluster_6	no
CHT	CHT10	cluster_6	no
CHT	CHT11	cluster_6	no
CHT	CHT12	cluster_6	no
CHT	CHT14	cluster_6	no
CHT	CHT15	cluster_6	no
CHT	CHT16	cluster_6	no
CHT	CHT19	cluster_6	no
CHT	CHT23	cluster_6	no
CHT	CHT26	cluster_6	no
CHT	CHT28	cluster_6	no
TU	TU01	cluster_8	no
TU	TU02	cluster_8	no
TU	TU03	cluster_8	no
TU	TU06	cluster_8	no
TU	TU08	cluster_8	no
TU	TU10	cluster_8	no
TU	TU12	cluster_8	no
TU	TU14	cluster_8	no
CGN	CGN1	cluster_8	no
CGN	CGN2	cluster_8	no
CGN	CGN3	cluster_8	no
CGN	CGN4	cluster_8	no
CGN	CGN5	cluster_8	no
CGN	CGN6	cluster_8	no
CGN	CGN7	cluster_8	no
CGN	CGN8	cluster_8	no
DP	DP03	cluster_8	no
DP	DP05	cluster_8	no
DP	DP07	cluster_8	no
DP	DP09	cluster_8	no
DP	DP10	cluster_8	no
DP	DP12	cluster_8	no
DP	DP13	cluster_8	no
DP	DP15	cluster_8	no
DP	DP16	cluster_8	no
DP	DP20	cluster_8	no
DP	DP21	cluster_8	no
DP	DP23	cluster_8	no
DP	DP24	cluster_8	no
DP	DP25	cluster_8	no
DP	DP28	cluster_8	no
DP	DP29	cluster_8	no
DP	DP31	cluster_8	no
DP	DP32	cluster_8	no
DP	DP33	cluster_8	no
DP	DP34	cluster_8	no
KG	KG03	cluster_8	no
KG	KG05	cluster_8	no
KG	KG07	cluster_8	no
KG	KG12	cluster_8	no
KG	KG14	cluster_8	no
KG	KG15	cluster_8	no
KG	KG18	cluster_8	no
KG	KG19	cluster_8	no
KG	KG20	cluster_8	no
KG	KG22	cluster_8	no
KG	KG24	cluster_8	no
KG	KG26	cluster_8	no
KG	KG29	cluster_8	no
KG	KG32	cluster_8	no
KG	KG33	cluster_8	no
KG	KG35	cluster_8	no
KG	KG41	cluster_8	no
KG	KG42	cluster_8	no
KG	KG43	cluster_8	no
KG	KG44	cluster_8	no
SN	SN03	cluster_8	no
SN	SN04	cluster_8	no
SN	SN08	cluster_8	no
SN	SN09	cluster_8	no
SN	SN10	cluster_8	no
SN	SN11	cluster_8	no
SN	SN12	cluster_8	no
SN	SN13	cluster_8	no
SN	SN14	cluster_8	no
SN	SN15	cluster_8	no
SN	SN16	cluster_8	no
SN	SN17	cluster_8	yes
SN	SN18	cluster_8	no
SN	SN19	cluster_8	no
SN	SN20	cluster_8	no
SN	SN21	cluster_8	no
SN	SN23	cluster_8	no
SN	SN24	cluster_8	yes
SN	SN26	cluster_8	no
CHT	CHT01	cluster_8	no
CHT	CHT02	cluster_8	no
CHT	CHT03	cluster_8	no
CHT	CHT04	cluster_8	no
CHT	CHT05	cluster_8	no
CHT	CHT06	cluster_8	no
CHT	CHT07	cluster_8	no
CHT	CHT08	cluster_8	no
CHT	CHT10	cluster_8	no
CHT	CHT11	cluster_8	no
CHT	CHT12	cluster_8	no
CHT	CHT14	cluster_8	no
CHT	CHT15	cluster_8	no
CHT	CHT16	cluster_8	no
CHT	CHT19	cluster_8	no
CHT	CHT23	cluster_8	no
CHT	CHT26	cluster_8	no
CHT	CHT28	cluster_8	no
TU	TU01	cluster_24	no
TU	TU02	cluster_24	no
TU	TU03	cluster_24	no
TU	TU06	cluster_24	no
TU	TU08	cluster_24	no
TU	TU10	cluster_24	no
TU	TU12	cluster_24	no
TU	TU14	cluster_24	no
CGN	CGN1	cluster_24	yes
CGN	CGN2	cluster_24	yes
CGN	CGN3	cluster_24	yes
CGN	CGN4	cluster_24	yes
CGN	CGN5	cluster_24	yes
CGN	CGN6	cluster_24	yes
CGN	CGN7	cluster_24	yes
CGN	CGN8	cluster_24	yes
DP	DP03	cluster_24	yes
DP	DP05	cluster_24	yes
DP	DP07	cluster_24	yes
DP	DP09	cluster_24	yes
DP	DP10	cluster_24	yes
DP	DP12	cluster_24	yes
DP	DP13	cluster_24	no
DP	DP15	cluster_24	no
DP	DP16	cluster_24	no
DP	DP20	cluster_24	no
DP	DP21	cluster_24	yes
DP	DP23	cluster_24	no
DP	DP24	cluster_24	yes
DP	DP25	cluster_24	yes
DP	DP28	cluster_24	no
DP	DP29	cluster_24	yes
DP	DP31	cluster_24	yes
DP	DP32	cluster_24	yes
DP	DP33	cluster_24	yes
DP	DP34	cluster_24	yes
KG	KG03	cluster_24	yes
KG	KG05	cluster_24	no
KG	KG07	cluster_24	yes
KG	KG12	cluster_24	yes
KG	KG14	cluster_24	yes
KG	KG15	cluster_24	yes
KG	KG18	cluster_24	yes
KG	KG19	cluster_24	yes
KG	KG20	cluster_24	yes
KG	KG22	cluster_24	no
KG	KG24	cluster_24	yes
KG	KG26	cluster_24	yes
KG	KG29	cluster_24	yes
KG	KG32	cluster_24	yes
KG	KG33	cluster_24	yes
KG	KG35	cluster_24	no
KG	KG41	cluster_24	no
KG	KG42	cluster_24	yes
KG	KG43	cluster_24	no
KG	KG44	cluster_24	yes
SN	SN03	cluster_24	yes
SN	SN04	cluster_24	yes
SN	SN08	cluster_24	yes
SN	SN09	cluster_24	yes
SN	SN10	cluster_24	no
SN	SN11	cluster_24	yes
SN	SN12	cluster_24	yes
SN	SN13	cluster_24	yes
SN	SN14	cluster_24	yes
SN	SN15	cluster_24	yes
SN	SN16	cluster_24	yes
SN	SN17	cluster_24	yes
SN	SN18	cluster_24	no
SN	SN19	cluster_24	yes
SN	SN20	cluster_24	yes
SN	SN21	cluster_24	no
SN	SN23	cluster_24	yes
SN	SN24	cluster_24	yes
SN	SN26	cluster_24	yes
CHT	CHT01	cluster_24	no
CHT	CHT02	cluster_24	no
CHT	CHT03	cluster_24	yes
CHT	CHT04	cluster_24	yes
CHT	CHT05	cluster_24	yes
CHT	CHT06	cluster_24	yes
CHT	CHT07	cluster_24	no
CHT	CHT08	cluster_24	yes
CHT	CHT10	cluster_24	yes
CHT	CHT11	cluster_24	yes
CHT	CHT12	cluster_24	no
CHT	CHT14	cluster_24	no
CHT	CHT15	cluster_24	no
CHT	CHT16	cluster_24	yes
CHT	CHT19	cluster_24	yes
CHT	CHT23	cluster_24	yes
CHT	CHT26	cluster_24	yes
CHT	CHT28	cluster_24	yes
TU	TU01	cluster_25	no
TU	TU02	cluster_25	no
TU	TU03	cluster_25	no
TU	TU06	cluster_25	no
TU	TU08	cluster_25	no
TU	TU10	cluster_25	no
TU	TU12	cluster_25	no
TU	TU14	cluster_25	no
CGN	CGN1	cluster_25	yes
CGN	CGN2	cluster_25	yes
CGN	CGN3	cluster_25	no
CGN	CGN4	cluster_25	yes
CGN	CGN5	cluster_25	yes
CGN	CGN6	cluster_25	yes
CGN	CGN7	cluster_25	yes
CGN	CGN8	cluster_25	yes
DP	DP03	cluster_25	no
DP	DP05	cluster_25	no
DP	DP07	cluster_25	no
DP	DP09	cluster_25	no
DP	DP10	cluster_25	no
DP	DP12	cluster_25	no
DP	DP13	cluster_25	no
DP	DP15	cluster_25	no
DP	DP16	cluster_25	no
DP	DP20	cluster_25	no
DP	DP21	cluster_25	no
DP	DP23	cluster_25	no
DP	DP24	cluster_25	no
DP	DP25	cluster_25	no
DP	DP28	cluster_25	no
DP	DP29	cluster_25	no
DP	DP31	cluster_25	no
DP	DP32	cluster_25	no
DP	DP33	cluster_25	no
DP	DP34	cluster_25	no
KG	KG03	cluster_25	no
KG	KG05	cluster_25	no
KG	KG07	cluster_25	no
KG	KG12	cluster_25	no
KG	KG14	cluster_25	no
KG	KG15	cluster_25	no
KG	KG18	cluster_25	no
KG	KG19	cluster_25	no
KG	KG20	cluster_25	no
KG	KG22	cluster_25	yes
KG	KG24	cluster_25	no
KG	KG26	cluster_25	yes
KG	KG29	cluster_25	no
KG	KG32	cluster_25	no
KG	KG33	cluster_25	no
KG	KG35	cluster_25	no
KG	KG41	cluster_25	no
KG	KG42	cluster_25	no
KG	KG43	cluster_25	no
KG	KG44	cluster_25	no
SN	SN03	cluster_25	no
SN	SN04	cluster_25	no
SN	SN08	cluster_25	no
SN	SN09	cluster_25	no
SN	SN10	cluster_25	no
SN	SN11	cluster_25	no
SN	SN12	cluster_25	no
SN	SN13	cluster_25	no
SN	SN14	cluster_25	no
SN	SN15	cluster_25	no
SN	SN16	cluster_25	no
SN	SN17	cluster_25	yes
SN	SN18	cluster_25	no
SN	SN19	cluster_25	yes
SN	SN20	cluster_25	no
SN	SN21	cluster_25	no
SN	SN23	cluster_25	no
SN	SN24	cluster_25	yes
SN	SN26	cluster_25	no
CHT	CHT01	cluster_25	no
CHT	CHT02	cluster_25	no
CHT	CHT03	cluster_25	no
CHT	CHT04	cluster_25	no
CHT	CHT05	cluster_25	no
CHT	CHT06	cluster_25	no
CHT	CHT07	cluster_25	no
CHT	CHT08	cluster_25	no
CHT	CHT10	cluster_25	no
CHT	CHT11	cluster_25	yes
CHT	CHT12	cluster_25	no
CHT	CHT14	cluster_25	no
CHT	CHT15	cluster_25	no
CHT	CHT16	cluster_25	no
CHT	CHT19	cluster_25	no
CHT	CHT23	cluster_25	no
CHT	CHT26	cluster_25	no
CHT	CHT28	cluster_25	no
TU	TU01	cluster_31	yes
TU	TU02	cluster_31	yes
TU	TU03	cluster_31	yes
TU	TU06	cluster_31	yes
TU	TU08	cluster_31	yes
TU	TU10	cluster_31	no
TU	TU12	cluster_31	no
TU	TU14	cluster_31	no
CGN	CGN1	cluster_31	yes
CGN	CGN2	cluster_31	yes
CGN	CGN3	cluster_31	yes
CGN	CGN4	cluster_31	yes
CGN	CGN5	cluster_31	yes
CGN	CGN6	cluster_31	yes
CGN	CGN7	cluster_31	yes
CGN	CGN8	cluster_31	yes
DP	DP03	cluster_31	yes
DP	DP05	cluster_31	no
DP	DP07	cluster_31	no
DP	DP09	cluster_31	no
DP	DP10	cluster_31	yes
DP	DP12	cluster_31	no
DP	DP13	cluster_31	no
DP	DP15	cluster_31	no
DP	DP16	cluster_31	no
DP	DP20	cluster_31	no
DP	DP21	cluster_31	yes
DP	DP23	cluster_31	yes
DP	DP24	cluster_31	no
DP	DP25	cluster_31	yes
DP	DP28	cluster_31	no
DP	DP29	cluster_31	no
DP	DP31	cluster_31	no
DP	DP32	cluster_31	yes
DP	DP33	cluster_31	no
DP	DP34	cluster_31	no
KG	KG03	cluster_31	no
KG	KG05	cluster_31	no
KG	KG07	cluster_31	no
KG	KG12	cluster_31	no
KG	KG14	cluster_31	yes
KG	KG15	cluster_31	no
KG	KG18	cluster_31	yes
KG	KG19	cluster_31	yes
KG	KG20	cluster_31	no
KG	KG22	cluster_31	no
KG	KG24	cluster_31	yes
KG	KG26	cluster_31	no
KG	KG29	cluster_31	yes
KG	KG32	cluster_31	yes
KG	KG33	cluster_31	yes
KG	KG35	cluster_31	no
KG	KG41	cluster_31	no
KG	KG42	cluster_31	no
KG	KG43	cluster_31	yes
KG	KG44	cluster_31	no
SN	SN03	cluster_31	no
SN	SN04	cluster_31	no
SN	SN08	cluster_31	yes
SN	SN09	cluster_31	no
SN	SN10	cluster_31	no
SN	SN11	cluster_31	no
SN	SN12	cluster_31	no
SN	SN13	cluster_31	yes
SN	SN14	cluster_31	no
SN	SN15	cluster_31	yes
SN	SN16	cluster_31	yes
SN	SN17	cluster_31	no
SN	SN18	cluster_31	yes
SN	SN19	cluster_31	no
SN	SN20	cluster_31	no
SN	SN21	cluster_31	no
SN	SN23	cluster_31	no
SN	SN24	cluster_31	yes
SN	SN26	cluster_31	no
CHT	CHT01	cluster_31	yes
CHT	CHT02	cluster_31	yes
CHT	CHT03	cluster_31	no
CHT	CHT04	cluster_31	no
CHT	CHT05	cluster_31	no
CHT	CHT06	cluster_31	no
CHT	CHT07	cluster_31	no
CHT	CHT08	cluster_31	no
CHT	CHT10	cluster_31	yes
CHT	CHT11	cluster_31	yes
CHT	CHT12	cluster_31	no
CHT	CHT14	cluster_31	no
CHT	CHT15	cluster_31	no
CHT	CHT16	cluster_31	yes
CHT	CHT19	cluster_31	no
CHT	CHT23	cluster_31	no
CHT	CHT26	cluster_31	no
CHT	CHT28	cluster_31	no
TU	TU01	cluster_34	no
TU	TU02	cluster_34	no
TU	TU03	cluster_34	no
TU	TU06	cluster_34	no
TU	TU08	cluster_34	no
TU	TU10	cluster_34	no
TU	TU12	cluster_34	no
TU	TU14	cluster_34	no
CGN	CGN1	cluster_34	yes
CGN	CGN2	cluster_34	no
CGN	CGN3	cluster_34	no
CGN	CGN4	cluster_34	yes
CGN	CGN5	cluster_34	no
CGN	CGN6	cluster_34	no
CGN	CGN7	cluster_34	no
CGN	CGN8	cluster_34	yes
DP	DP03	cluster_34	no
DP	DP05	cluster_34	no
DP	DP07	cluster_34	no
DP	DP09	cluster_34	yes
DP	DP10	cluster_34	no
DP	DP12	cluster_34	no
DP	DP13	cluster_34	no
DP	DP15	cluster_34	no
DP	DP16	cluster_34	no
DP	DP20	cluster_34	no
DP	DP21	cluster_34	yes
DP	DP23	cluster_34	no
DP	DP24	cluster_34	no
DP	DP25	cluster_34	no
DP	DP28	cluster_34	yes
DP	DP29	cluster_34	yes
DP	DP31	cluster_34	no
DP	DP32	cluster_34	no
DP	DP33	cluster_34	yes
DP	DP34	cluster_34	no
KG	KG03	cluster_34	yes
KG	KG05	cluster_34	yes
KG	KG07	cluster_34	yes
KG	KG12	cluster_34	no
KG	KG14	cluster_34	yes
KG	KG15	cluster_34	no
KG	KG18	cluster_34	yes
KG	KG19	cluster_34	no
KG	KG20	cluster_34	no
KG	KG22	cluster_34	yes
KG	KG24	cluster_34	no
KG	KG26	cluster_34	yes
KG	KG29	cluster_34	yes
KG	KG32	cluster_34	yes
KG	KG33	cluster_34	yes
KG	KG35	cluster_34	no
KG	KG41	cluster_34	yes
KG	KG42	cluster_34	no
KG	KG43	cluster_34	no
KG	KG44	cluster_34	no
SN	SN03	cluster_34	yes
SN	SN04	cluster_34	no
SN	SN08	cluster_34	no
SN	SN09	cluster_34	no
SN	SN10	cluster_34	yes
SN	SN11	cluster_34	no
SN	SN12	cluster_34	no
SN	SN13	cluster_34	no
SN	SN14	cluster_34	no
SN	SN15	cluster_34	no
SN	SN16	cluster_34	no
SN	SN17	cluster_34	no
SN	SN18	cluster_34	yes
SN	SN19	cluster_34	no
SN	SN20	cluster_34	no
SN	SN21	cluster_34	yes
SN	SN23	cluster_34	no
SN	SN24	cluster_34	no
SN	SN26	cluster_34	yes
CHT	CHT01	cluster_34	yes
CHT	CHT02	cluster_34	no
CHT	CHT03	cluster_34	no
CHT	CHT04	cluster_34	no
CHT	CHT05	cluster_34	yes
CHT	CHT06	cluster_34	no
CHT	CHT07	cluster_34	no
CHT	CHT08	cluster_34	no
CHT	CHT10	cluster_34	no
CHT	CHT11	cluster_34	no
CHT	CHT12	cluster_34	yes
CHT	CHT14	cluster_34	no
CHT	CHT15	cluster_34	no
CHT	CHT16	cluster_34	no
CHT	CHT19	cluster_34	no
CHT	CHT23	cluster_34	yes
CHT	CHT26	cluster_34	no
CHT	CHT28	cluster_34	no
TU	TU01	cluster_35	no
TU	TU02	cluster_35	yes
TU	TU03	cluster_35	yes
TU	TU06	cluster_35	yes
TU	TU08	cluster_35	no
TU	TU10	cluster_35	no
TU	TU12	cluster_35	no
TU	TU14	cluster_35	no
CGN	CGN1	cluster_35	yes
CGN	CGN2	cluster_35	yes
CGN	CGN3	cluster_35	yes
CGN	CGN4	cluster_35	yes
CGN	CGN5	cluster_35	yes
CGN	CGN6	cluster_35	yes
CGN	CGN7	cluster_35	yes
CGN	CGN8	cluster_35	yes
DP	DP03	cluster_35	no
DP	DP05	cluster_35	yes
DP	DP07	cluster_35	no
DP	DP09	cluster_35	no
DP	DP10	cluster_35	yes
DP	DP12	cluster_35	yes
DP	DP13	cluster_35	yes
DP	DP15	cluster_35	no
DP	DP16	cluster_35	yes
DP	DP20	cluster_35	yes
DP	DP21	cluster_35	yes
DP	DP23	cluster_35	yes
DP	DP24	cluster_35	yes
DP	DP25	cluster_35	no
DP	DP28	cluster_35	yes
DP	DP29	cluster_35	yes
DP	DP31	cluster_35	no
DP	DP32	cluster_35	no
DP	DP33	cluster_35	yes
DP	DP34	cluster_35	yes
KG	KG03	cluster_35	yes
KG	KG05	cluster_35	no
KG	KG07	cluster_35	no
KG	KG12	cluster_35	no
KG	KG14	cluster_35	yes
KG	KG15	cluster_35	no
KG	KG18	cluster_35	yes
KG	KG19	cluster_35	yes
KG	KG20	cluster_35	no
KG	KG22	cluster_35	no
KG	KG24	cluster_35	no
KG	KG26	cluster_35	yes
KG	KG29	cluster_35	no
KG	KG32	cluster_35	no
KG	KG33	cluster_35	no
KG	KG35	cluster_35	no
KG	KG41	cluster_35	no
KG	KG42	cluster_35	no
KG	KG43	cluster_35	yes
KG	KG44	cluster_35	yes
SN	SN03	cluster_35	yes
SN	SN04	cluster_35	no
SN	SN08	cluster_35	yes
SN	SN09	cluster_35	no
SN	SN10	cluster_35	no
SN	SN11	cluster_35	yes
SN	SN12	cluster_35	yes
SN	SN13	cluster_35	yes
SN	SN14	cluster_35	yes
SN	SN15	cluster_35	yes
SN	SN16	cluster_35	yes
SN	SN17	cluster_35	no
SN	SN18	cluster_35	no
SN	SN19	cluster_35	yes
SN	SN20	cluster_35	yes
SN	SN21	cluster_35	no
SN	SN23	cluster_35	no
SN	SN24	cluster_35	no
SN	SN26	cluster_35	yes
CHT	CHT01	cluster_35	no
CHT	CHT02	cluster_35	yes
CHT	CHT03	cluster_35	yes
CHT	CHT04	cluster_35	yes
CHT	CHT05	cluster_35	yes
CHT	CHT06	cluster_35	yes
CHT	CHT07	cluster_35	no
CHT	CHT08	cluster_35	no
CHT	CHT10	cluster_35	yes
CHT	CHT11	cluster_35	yes
CHT	CHT12	cluster_35	yes
CHT	CHT14	cluster_35	no
CHT	CHT15	cluster_35	yes
CHT	CHT16	cluster_35	yes
CHT	CHT19	cluster_35	yes
CHT	CHT23	cluster_35	yes
CHT	CHT26	cluster_35	yes
CHT	CHT28	cluster_35	yes
TU	TU01	cluster_36	no
TU	TU02	cluster_36	yes
TU	TU03	cluster_36	yes
TU	TU06	cluster_36	yes
TU	TU08	cluster_36	no
TU	TU10	cluster_36	no
TU	TU12	cluster_36	no
TU	TU14	cluster_36	no
CGN	CGN1	cluster_36	no
CGN	CGN2	cluster_36	no
CGN	CGN3	cluster_36	no
CGN	CGN4	cluster_36	no
CGN	CGN5	cluster_36	no
CGN	CGN6	cluster_36	no
CGN	CGN7	cluster_36	yes
CGN	CGN8	cluster_36	yes
DP	DP03	cluster_36	no
DP	DP05	cluster_36	no
DP	DP07	cluster_36	no
DP	DP09	cluster_36	no
DP	DP10	cluster_36	no
DP	DP12	cluster_36	no
DP	DP13	cluster_36	no
DP	DP15	cluster_36	no
DP	DP16	cluster_36	no
DP	DP20	cluster_36	no
DP	DP21	cluster_36	yes
DP	DP23	cluster_36	no
DP	DP24	cluster_36	no
DP	DP25	cluster_36	no
DP	DP28	cluster_36	no
DP	DP29	cluster_36	no
DP	DP31	cluster_36	no
DP	DP32	cluster_36	no
DP	DP33	cluster_36	no
DP	DP34	cluster_36	no
KG	KG03	cluster_36	yes
KG	KG05	cluster_36	no
KG	KG07	cluster_36	no
KG	KG12	cluster_36	no
KG	KG14	cluster_36	yes
KG	KG15	cluster_36	no
KG	KG18	cluster_36	no
KG	KG19	cluster_36	no
KG	KG20	cluster_36	no
KG	KG22	cluster_36	no
KG	KG24	cluster_36	no
KG	KG26	cluster_36	no
KG	KG29	cluster_36	no
KG	KG32	cluster_36	no
KG	KG33	cluster_36	no
KG	KG35	cluster_36	no
KG	KG41	cluster_36	no
KG	KG42	cluster_36	no
KG	KG43	cluster_36	no
KG	KG44	cluster_36	no
SN	SN03	cluster_36	yes
SN	SN04	cluster_36	yes
SN	SN08	cluster_36	no
SN	SN09	cluster_36	no
SN	SN10	cluster_36	yes
SN	SN11	cluster_36	yes
SN	SN12	cluster_36	no
SN	SN13	cluster_36	no
SN	SN14	cluster_36	no
SN	SN15	cluster_36	yes
SN	SN16	cluster_36	no
SN	SN17	cluster_36	no
SN	SN18	cluster_36	yes
SN	SN19	cluster_36	no
SN	SN20	cluster_36	no
SN	SN21	cluster_36	no
SN	SN23	cluster_36	no
SN	SN24	cluster_36	no
SN	SN26	cluster_36	yes
CHT	CHT01	cluster_36	no
CHT	CHT02	cluster_36	no
CHT	CHT03	cluster_36	yes
CHT	CHT04	cluster_36	yes
CHT	CHT05	cluster_36	yes
CHT	CHT06	cluster_36	yes
CHT	CHT07	cluster_36	no
CHT	CHT08	cluster_36	yes
CHT	CHT10	cluster_36	no
CHT	CHT11	cluster_36	yes
CHT	CHT12	cluster_36	no
CHT	CHT14	cluster_36	no
CHT	CHT15	cluster_36	no
CHT	CHT16	cluster_36	no
CHT	CHT19	cluster_36	no
CHT	CHT23	cluster_36	no
CHT	CHT26	cluster_36	no
CHT	CHT28	cluster_36	no
TU	TU01	cluster_37	no
TU	TU02	cluster_37	no
TU	TU03	cluster_37	no
TU	TU06	cluster_37	no
TU	TU08	cluster_37	no
TU	TU10	cluster_37	no
TU	TU12	cluster_37	no
TU	TU14	cluster_37	no
CGN	CGN1	cluster_37	yes
CGN	CGN2	cluster_37	yes
CGN	CGN3	cluster_37	yes
CGN	CGN4	cluster_37	yes
CGN	CGN5	cluster_37	yes
CGN	CGN6	cluster_37	yes
CGN	CGN7	cluster_37	yes
CGN	CGN8	cluster_37	yes
DP	DP03	cluster_37	no
DP	DP05	cluster_37	no
DP	DP07	cluster_37	no
DP	DP09	cluster_37	no
DP	DP10	cluster_37	no
DP	DP12	cluster_37	no
DP	DP13	cluster_37	yes
DP	DP15	cluster_37	no
DP	DP16	cluster_37	no
DP	DP20	cluster_37	no
DP	DP21	cluster_37	yes
DP	DP23	cluster_37	no
DP	DP24	cluster_37	no
DP	DP25	cluster_37	no
DP	DP28	cluster_37	yes
DP	DP29	cluster_37	no
DP	DP31	cluster_37	no
DP	DP32	cluster_37	yes
DP	DP33	cluster_37	no
DP	DP34	cluster_37	no
KG	KG03	cluster_37	yes
KG	KG05	cluster_37	no
KG	KG07	cluster_37	no
KG	KG12	cluster_37	no
KG	KG14	cluster_37	yes
KG	KG15	cluster_37	no
KG	KG18	cluster_37	no
KG	KG19	cluster_37	yes
KG	KG20	cluster_37	no
KG	KG22	cluster_37	no
KG	KG24	cluster_37	no
KG	KG26	cluster_37	no
KG	KG29	cluster_37	yes
KG	KG32	cluster_37	no
KG	KG33	cluster_37	yes
KG	KG35	cluster_37	yes
KG	KG41	cluster_37	no
KG	KG42	cluster_37	no
KG	KG43	cluster_37	no
KG	KG44	cluster_37	no
SN	SN03	cluster_37	no
SN	SN04	cluster_37	no
SN	SN08	cluster_37	no
SN	SN09	cluster_37	no
SN	SN10	cluster_37	no
SN	SN11	cluster_37	yes
SN	SN12	cluster_37	no
SN	SN13	cluster_37	no
SN	SN14	cluster_37	no
SN	SN15	cluster_37	no
SN	SN16	cluster_37	no
SN	SN17	cluster_37	no
SN	SN18	cluster_37	no
SN	SN19	cluster_37	no
SN	SN20	cluster_37	no
SN	SN21	cluster_37	no
SN	SN23	cluster_37	no
SN	SN24	cluster_37	no
SN	SN26	cluster_37	no
CHT	CHT01	cluster_37	no
CHT	CHT02	cluster_37	yes
CHT	CHT03	cluster_37	no
CHT	CHT04	cluster_37	no
CHT	CHT05	cluster_37	no
CHT	CHT06	cluster_37	no
CHT	CHT07	cluster_37	no
CHT	CHT08	cluster_37	no
CHT	CHT10	cluster_37	no
CHT	CHT11	cluster_37	no
CHT	CHT12	cluster_37	no
CHT	CHT14	cluster_37	no
CHT	CHT15	cluster_37	no
CHT	CHT16	cluster_37	yes
CHT	CHT19	cluster_37	no
CHT	CHT23	cluster_37	no
CHT	CHT26	cluster_37	no
CHT	CHT28	cluster_37	no
TU	TU01	cluster_39	yes
TU	TU02	cluster_39	yes
TU	TU03	cluster_39	yes
TU	TU06	cluster_39	yes
TU	TU08	cluster_39	yes
TU	TU10	cluster_39	no
TU	TU12	cluster_39	yes
TU	TU14	cluster_39	yes
CGN	CGN1	cluster_39	yes
CGN	CGN2	cluster_39	yes
CGN	CGN3	cluster_39	no
CGN	CGN4	cluster_39	no
CGN	CGN5	cluster_39	yes
CGN	CGN6	cluster_39	yes
CGN	CGN7	cluster_39	yes
CGN	CGN8	cluster_39	yes
DP	DP03	cluster_39	no
DP	DP05	cluster_39	no
DP	DP07	cluster_39	no
DP	DP09	cluster_39	no
DP	DP10	cluster_39	no
DP	DP12	cluster_39	yes
DP	DP13	cluster_39	no
DP	DP15	cluster_39	no
DP	DP16	cluster_39	yes
DP	DP20	cluster_39	no
DP	DP21	cluster_39	yes
DP	DP23	cluster_39	no
DP	DP24	cluster_39	no
DP	DP25	cluster_39	no
DP	DP28	cluster_39	no
DP	DP29	cluster_39	no
DP	DP31	cluster_39	no
DP	DP32	cluster_39	no
DP	DP33	cluster_39	no
DP	DP34	cluster_39	no
KG	KG03	cluster_39	no
KG	KG05	cluster_39	no
KG	KG07	cluster_39	no
KG	KG12	cluster_39	no
KG	KG14	cluster_39	no
KG	KG15	cluster_39	no
KG	KG18	cluster_39	no
KG	KG19	cluster_39	yes
KG	KG20	cluster_39	no
KG	KG22	cluster_39	no
KG	KG24	cluster_39	no
KG	KG26	cluster_39	yes
KG	KG29	cluster_39	no
KG	KG32	cluster_39	no
KG	KG33	cluster_39	no
KG	KG35	cluster_39	no
KG	KG41	cluster_39	no
KG	KG42	cluster_39	yes
KG	KG43	cluster_39	no
KG	KG44	cluster_39	no
SN	SN03	cluster_39	no
SN	SN04	cluster_39	no
SN	SN08	cluster_39	no
SN	SN09	cluster_39	no
SN	SN10	cluster_39	no
SN	SN11	cluster_39	yes
SN	SN12	cluster_39	no
SN	SN13	cluster_39	no
SN	SN14	cluster_39	no
SN	SN15	cluster_39	yes
SN	SN16	cluster_39	no
SN	SN17	cluster_39	no
SN	SN18	cluster_39	no
SN	SN19	cluster_39	no
SN	SN20	cluster_39	no
SN	SN21	cluster_39	no
SN	SN23	cluster_39	no
SN	SN24	cluster_39	yes
SN	SN26	cluster_39	no
CHT	CHT01	cluster_39	no
CHT	CHT02	cluster_39	no
CHT	CHT03	cluster_39	no
CHT	CHT04	cluster_39	no
CHT	CHT05	cluster_39	yes
CHT	CHT06	cluster_39	no
CHT	CHT07	cluster_39	no
CHT	CHT08	cluster_39	no
CHT	CHT10	cluster_39	no
CHT	CHT11	cluster_39	no
CHT	CHT12	cluster_39	no
CHT	CHT14	cluster_39	no
CHT	CHT15	cluster_39	no
CHT	CHT16	cluster_39	yes
CHT	CHT19	cluster_39	no
CHT	CHT23	cluster_39	no
CHT	CHT26	cluster_39	yes
CHT	CHT28	cluster_39	no
TU	TU01	cluster_40	no
TU	TU02	cluster_40	no
TU	TU03	cluster_40	no
TU	TU06	cluster_40	no
TU	TU08	cluster_40	no
TU	TU10	cluster_40	no
TU	TU12	cluster_40	no
TU	TU14	cluster_40	no
CGN	CGN1	cluster_40	yes
CGN	CGN2	cluster_40	yes
CGN	CGN3	cluster_40	no
CGN	CGN4	cluster_40	yes
CGN	CGN5	cluster_40	yes
CGN	CGN6	cluster_40	yes
CGN	CGN7	cluster_40	yes
CGN	CGN8	cluster_40	yes
DP	DP03	cluster_40	no
DP	DP05	cluster_40	no
DP	DP07	cluster_40	no
DP	DP09	cluster_40	no
DP	DP10	cluster_40	no
DP	DP12	cluster_40	no
DP	DP13	cluster_40	no
DP	DP15	cluster_40	no
DP	DP16	cluster_40	no
DP	DP20	cluster_40	no
DP	DP21	cluster_40	no
DP	DP23	cluster_40	no
DP	DP24	cluster_40	no
DP	DP25	cluster_40	no
DP	DP28	cluster_40	no
DP	DP29	cluster_40	yes
DP	DP31	cluster_40	no
DP	DP32	cluster_40	no
DP	DP33	cluster_40	no
DP	DP34	cluster_40	no
KG	KG03	cluster_40	no
KG	KG05	cluster_40	no
KG	KG07	cluster_40	yes
KG	KG12	cluster_40	no
KG	KG14	cluster_40	yes
KG	KG15	cluster_40	no
KG	KG18	cluster_40	no
KG	KG19	cluster_40	yes
KG	KG20	cluster_40	no
KG	KG22	cluster_40	no
KG	KG24	cluster_40	no
KG	KG26	cluster_40	no
KG	KG29	cluster_40	no
KG	KG32	cluster_40	no
KG	KG33	cluster_40	no
KG	KG35	cluster_40	no
KG	KG41	cluster_40	no
KG	KG42	cluster_40	yes
KG	KG43	cluster_40	yes
KG	KG44	cluster_40	no
SN	SN03	cluster_40	no
SN	SN04	cluster_40	yes
SN	SN08	cluster_40	no
SN	SN09	cluster_40	no
SN	SN10	cluster_40	no
SN	SN11	cluster_40	yes
SN	SN12	cluster_40	no
SN	SN13	cluster_40	yes
SN	SN14	cluster_40	no
SN	SN15	cluster_40	yes
SN	SN16	cluster_40	yes
SN	SN17	cluster_40	no
SN	SN18	cluster_40	yes
SN	SN19	cluster_40	no
SN	SN20	cluster_40	no
SN	SN21	cluster_40	no
SN	SN23	cluster_40	yes
SN	SN24	cluster_40	yes
SN	SN26	cluster_40	yes
CHT	CHT01	cluster_40	no
CHT	CHT02	cluster_40	yes
CHT	CHT03	cluster_40	yes
CHT	CHT04	cluster_40	no
CHT	CHT05	cluster_40	no
CHT	CHT06	cluster_40	no
CHT	CHT07	cluster_40	no
CHT	CHT08	cluster_40	no
CHT	CHT10	cluster_40	no
CHT	CHT11	cluster_40	no
CHT	CHT12	cluster_40	no
CHT	CHT14	cluster_40	no
CHT	CHT15	cluster_40	no
CHT	CHT16	cluster_40	no
CHT	CHT19	cluster_40	yes
CHT	CHT23	cluster_40	no
CHT	CHT26	cluster_40	no
CHT	CHT28	cluster_40	no
TU	TU01	cluster_41	no
TU	TU02	cluster_41	no
TU	TU03	cluster_41	no
TU	TU06	cluster_41	no
TU	TU08	cluster_41	no
TU	TU10	cluster_41	no
TU	TU12	cluster_41	no
TU	TU14	cluster_41	no
CGN	CGN1	cluster_41	yes
CGN	CGN2	cluster_41	yes
CGN	CGN3	cluster_41	yes
CGN	CGN4	cluster_41	yes
CGN	CGN5	cluster_41	yes
CGN	CGN6	cluster_41	yes
CGN	CGN7	cluster_41	yes
CGN	CGN8	cluster_41	yes
DP	DP03	cluster_41	no
DP	DP05	cluster_41	yes
DP	DP07	cluster_41	no
DP	DP09	cluster_41	no
DP	DP10	cluster_41	no
DP	DP12	cluster_41	no
DP	DP13	cluster_41	no
DP	DP15	cluster_41	no
DP	DP16	cluster_41	no
DP	DP20	cluster_41	no
DP	DP21	cluster_41	no
DP	DP23	cluster_41	no
DP	DP24	cluster_41	no
DP	DP25	cluster_41	no
DP	DP28	cluster_41	no
DP	DP29	cluster_41	no
DP	DP31	cluster_41	no
DP	DP32	cluster_41	no
DP	DP33	cluster_41	no
DP	DP34	cluster_41	no
KG	KG03	cluster_41	yes
KG	KG05	cluster_41	yes
KG	KG07	cluster_41	yes
KG	KG12	cluster_41	yes
KG	KG14	cluster_41	no
KG	KG15	cluster_41	yes
KG	KG18	cluster_41	no
KG	KG19	cluster_41	yes
KG	KG20	cluster_41	yes
KG	KG22	cluster_41	yes
KG	KG24	cluster_41	yes
KG	KG26	cluster_41	yes
KG	KG29	cluster_41	yes
KG	KG32	cluster_41	yes
KG	KG33	cluster_41	yes
KG	KG35	cluster_41	yes
KG	KG41	cluster_41	yes
KG	KG42	cluster_41	no
KG	KG43	cluster_41	no
KG	KG44	cluster_41	yes
SN	SN03	cluster_41	yes
SN	SN04	cluster_41	no
SN	SN08	cluster_41	no
SN	SN09	cluster_41	yes
SN	SN10	cluster_41	no
SN	SN11	cluster_41	yes
SN	SN12	cluster_41	yes
SN	SN13	cluster_41	no
SN	SN14	cluster_41	no
SN	SN15	cluster_41	yes
SN	SN16	cluster_41	no
SN	SN17	cluster_41	no
SN	SN18	cluster_41	no
SN	SN19	cluster_41	no
SN	SN20	cluster_41	yes
SN	SN21	cluster_41	yes
SN	SN23	cluster_41	yes
SN	SN24	cluster_41	no
SN	SN26	cluster_41	yes
CHT	CHT01	cluster_41	no
CHT	CHT02	cluster_41	yes
CHT	CHT03	cluster_41	no
CHT	CHT04	cluster_41	yes
CHT	CHT05	cluster_41	yes
CHT	CHT06	cluster_41	no
CHT	CHT07	cluster_41	no
CHT	CHT08	cluster_41	yes
CHT	CHT10	cluster_41	no
CHT	CHT11	cluster_41	no
CHT	CHT12	cluster_41	yes
CHT	CHT14	cluster_41	no
CHT	CHT15	cluster_41	no
CHT	CHT16	cluster_41	no
CHT	CHT19	cluster_41	no
CHT	CHT23	cluster_41	no
CHT	CHT26	cluster_41	yes
CHT	CHT28	cluster_41	yes
TU	TU01	cluster_42	no
TU	TU02	cluster_42	no
TU	TU03	cluster_42	no
TU	TU06	cluster_42	no
TU	TU08	cluster_42	no
TU	TU10	cluster_42	no
TU	TU12	cluster_42	no
TU	TU14	cluster_42	no
CGN	CGN1	cluster_42	yes
CGN	CGN2	cluster_42	yes
CGN	CGN3	cluster_42	no
CGN	CGN4	cluster_42	yes
CGN	CGN5	cluster_42	yes
CGN	CGN6	cluster_42	yes
CGN	CGN7	cluster_42	yes
CGN	CGN8	cluster_42	yes
DP	DP03	cluster_42	no
DP	DP05	cluster_42	yes
DP	DP07	cluster_42	no
DP	DP09	cluster_42	yes
DP	DP10	cluster_42	no
DP	DP12	cluster_42	no
DP	DP13	cluster_42	no
DP	DP15	cluster_42	no
DP	DP16	cluster_42	no
DP	DP20	cluster_42	no
DP	DP21	cluster_42	no
DP	DP23	cluster_42	no
DP	DP24	cluster_42	no
DP	DP25	cluster_42	no
DP	DP28	cluster_42	no
DP	DP29	cluster_42	no
DP	DP31	cluster_42	no
DP	DP32	cluster_42	no
DP	DP33	cluster_42	no
DP	DP34	cluster_42	no
KG	KG03	cluster_42	no
KG	KG05	cluster_42	no
KG	KG07	cluster_42	yes
KG	KG12	cluster_42	no
KG	KG14	cluster_42	no
KG	KG15	cluster_42	no
KG	KG18	cluster_42	no
KG	KG19	cluster_42	no
KG	KG20	cluster_42	no
KG	KG22	cluster_42	no
KG	KG24	cluster_42	no
KG	KG26	cluster_42	no
KG	KG29	cluster_42	no
KG	KG32	cluster_42	no
KG	KG33	cluster_42	no
KG	KG35	cluster_42	no
KG	KG41	cluster_42	no
KG	KG42	cluster_42	no
KG	KG43	cluster_42	no
KG	KG44	cluster_42	yes
SN	SN03	cluster_42	no
SN	SN04	cluster_42	no
SN	SN08	cluster_42	no
SN	SN09	cluster_42	no
SN	SN10	cluster_42	yes
SN	SN11	cluster_42	yes
SN	SN12	cluster_42	yes
SN	SN13	cluster_42	yes
SN	SN14	cluster_42	no
SN	SN15	cluster_42	yes
SN	SN16	cluster_42	no
SN	SN17	cluster_42	yes
SN	SN18	cluster_42	no
SN	SN19	cluster_42	yes
SN	SN20	cluster_42	yes
SN	SN21	cluster_42	yes
SN	SN23	cluster_42	no
SN	SN24	cluster_42	no
SN	SN26	cluster_42	yes
CHT	CHT01	cluster_42	no
CHT	CHT02	cluster_42	no
CHT	CHT03	cluster_42	no
CHT	CHT04	cluster_42	yes
CHT	CHT05	cluster_42	no
CHT	CHT06	cluster_42	yes
CHT	CHT07	cluster_42	no
CHT	CHT08	cluster_42	no
CHT	CHT10	cluster_42	yes
CHT	CHT11	cluster_42	yes
CHT	CHT12	cluster_42	no
CHT	CHT14	cluster_42	no
CHT	CHT15	cluster_42	no
CHT	CHT16	cluster_42	no
CHT	CHT19	cluster_42	yes
CHT	CHT23	cluster_42	no
CHT	CHT26	cluster_42	no
CHT	CHT28	cluster_42	no
TU	TU01	cluster_43	yes
TU	TU02	cluster_43	yes
TU	TU03	cluster_43	yes
TU	TU06	cluster_43	yes
TU	TU08	cluster_43	no
TU	TU10	cluster_43	yes
TU	TU12	cluster_43	yes
TU	TU14	cluster_43	yes
CGN	CGN1	cluster_43	yes
CGN	CGN2	cluster_43	yes
CGN	CGN3	cluster_43	yes
CGN	CGN4	cluster_43	yes
CGN	CGN5	cluster_43	yes
CGN	CGN6	cluster_43	yes
CGN	CGN7	cluster_43	yes
CGN	CGN8	cluster_43	yes
DP	DP03	cluster_43	no
DP	DP05	cluster_43	no
DP	DP07	cluster_43	no
DP	DP09	cluster_43	no
DP	DP10	cluster_43	no
DP	DP12	cluster_43	no
DP	DP13	cluster_43	yes
DP	DP15	cluster_43	no
DP	DP16	cluster_43	no
DP	DP20	cluster_43	no
DP	DP21	cluster_43	no
DP	DP23	cluster_43	no
DP	DP24	cluster_43	no
DP	DP25	cluster_43	no
DP	DP28	cluster_43	no
DP	DP29	cluster_43	no
DP	DP31	cluster_43	no
DP	DP32	cluster_43	no
DP	DP33	cluster_43	no
DP	DP34	cluster_43	no
KG	KG03	cluster_43	no
KG	KG05	cluster_43	no
KG	KG07	cluster_43	no
KG	KG12	cluster_43	no
KG	KG14	cluster_43	no
KG	KG15	cluster_43	no
KG	KG18	cluster_43	no
KG	KG19	cluster_43	yes
KG	KG20	cluster_43	no
KG	KG22	cluster_43	no
KG	KG24	cluster_43	no
KG	KG26	cluster_43	no
KG	KG29	cluster_43	yes
KG	KG32	cluster_43	no
KG	KG33	cluster_43	no
KG	KG35	cluster_43	no
KG	KG41	cluster_43	no
KG	KG42	cluster_43	no
KG	KG43	cluster_43	no
KG	KG44	cluster_43	yes
SN	SN03	cluster_43	no
SN	SN04	cluster_43	no
SN	SN08	cluster_43	yes
SN	SN09	cluster_43	no
SN	SN10	cluster_43	no
SN	SN11	cluster_43	no
SN	SN12	cluster_43	no
SN	SN13	cluster_43	no
SN	SN14	cluster_43	yes
SN	SN15	cluster_43	no
SN	SN16	cluster_43	no
SN	SN17	cluster_43	no
SN	SN18	cluster_43	yes
SN	SN19	cluster_43	no
SN	SN20	cluster_43	no
SN	SN21	cluster_43	no
SN	SN23	cluster_43	no
SN	SN24	cluster_43	no
SN	SN26	cluster_43	no
CHT	CHT01	cluster_43	yes
CHT	CHT02	cluster_43	no
CHT	CHT03	cluster_43	no
CHT	CHT04	cluster_43	no
CHT	CHT05	cluster_43	no
CHT	CHT06	cluster_43	no
CHT	CHT07	cluster_43	yes
CHT	CHT08	cluster_43	no
CHT	CHT10	cluster_43	no
CHT	CHT11	cluster_43	no
CHT	CHT12	cluster_43	no
CHT	CHT14	cluster_43	no
CHT	CHT15	cluster_43	yes
CHT	CHT16	cluster_43	yes
CHT	CHT19	cluster_43	no
CHT	CHT23	cluster_43	yes
CHT	CHT26	cluster_43	yes
CHT	CHT28	cluster_43	yes
TU	TU01	cluster_44	yes
TU	TU02	cluster_44	yes
TU	TU03	cluster_44	yes
TU	TU06	cluster_44	yes
TU	TU08	cluster_44	yes
TU	TU10	cluster_44	yes
TU	TU12	cluster_44	no
TU	TU14	cluster_44	yes
CGN	CGN1	cluster_44	yes
CGN	CGN2	cluster_44	yes
CGN	CGN3	cluster_44	yes
CGN	CGN4	cluster_44	yes
CGN	CGN5	cluster_44	yes
CGN	CGN6	cluster_44	yes
CGN	CGN7	cluster_44	yes
CGN	CGN8	cluster_44	yes
DP	DP03	cluster_44	no
DP	DP05	cluster_44	yes
DP	DP07	cluster_44	yes
DP	DP09	cluster_44	no
DP	DP10	cluster_44	no
DP	DP12	cluster_44	no
DP	DP13	cluster_44	no
DP	DP15	cluster_44	no
DP	DP16	cluster_44	no
DP	DP20	cluster_44	no
DP	DP21	cluster_44	no
DP	DP23	cluster_44	no
DP	DP24	cluster_44	no
DP	DP25	cluster_44	no
DP	DP28	cluster_44	no
DP	DP29	cluster_44	no
DP	DP31	cluster_44	no
DP	DP32	cluster_44	no
DP	DP33	cluster_44	no
DP	DP34	cluster_44	no
KG	KG03	cluster_44	no
KG	KG05	cluster_44	no
KG	KG07	cluster_44	no
KG	KG12	cluster_44	yes
KG	KG14	cluster_44	no
KG	KG15	cluster_44	no
KG	KG18	cluster_44	no
KG	KG19	cluster_44	no
KG	KG20	cluster_44	no
KG	KG22	cluster_44	no
KG	KG24	cluster_44	no
KG	KG26	cluster_44	no
KG	KG29	cluster_44	no
KG	KG32	cluster_44	no
KG	KG33	cluster_44	no
KG	KG35	cluster_44	no
KG	KG41	cluster_44	no
KG	KG42	cluster_44	no
KG	KG43	cluster_44	no
KG	KG44	cluster_44	no
SN	SN03	cluster_44	no
SN	SN04	cluster_44	no
SN	SN08	cluster_44	yes
SN	SN09	cluster_44	yes
SN	SN10	cluster_44	no
SN	SN11	cluster_44	no
SN	SN12	cluster_44	yes
SN	SN13	cluster_44	no
SN	SN14	cluster_44	no
SN	SN15	cluster_44	yes
SN	SN16	cluster_44	no
SN	SN17	cluster_44	yes
SN	SN18	cluster_44	no
SN	SN19	cluster_44	yes
SN	SN20	cluster_44	no
SN	SN21	cluster_44	no
SN	SN23	cluster_44	no
SN	SN24	cluster_44	no
SN	SN26	cluster_44	no
CHT	CHT01	cluster_44	yes
CHT	CHT02	cluster_44	no
CHT	CHT03	cluster_44	no
CHT	CHT04	cluster_44	no
CHT	CHT05	cluster_44	no
CHT	CHT06	cluster_44	no
CHT	CHT07	cluster_44	yes
CHT	CHT08	cluster_44	no
CHT	CHT10	cluster_44	yes
CHT	CHT11	cluster_44	yes
CHT	CHT12	cluster_44	no
CHT	CHT14	cluster_44	no
CHT	CHT15	cluster_44	no
CHT	CHT16	cluster_44	yes
CHT	CHT19	cluster_44	no
CHT	CHT23	cluster_44	no
CHT	CHT26	cluster_44	no
CHT	CHT28	cluster_44	no
TU	TU01	cluster_48	no
TU	TU02	cluster_48	no
TU	TU03	cluster_48	no
TU	TU06	cluster_48	no
TU	TU08	cluster_48	no
TU	TU10	cluster_48	no
TU	TU12	cluster_48	no
TU	TU14	cluster_48	no
CGN	CGN1	cluster_48	yes
CGN	CGN2	cluster_48	yes
CGN	CGN3	cluster_48	yes
CGN	CGN4	cluster_48	yes
CGN	CGN5	cluster_48	yes
CGN	CGN6	cluster_48	yes
CGN	CGN7	cluster_48	yes
CGN	CGN8	cluster_48	yes
DP	DP03	cluster_48	no
DP	DP05	cluster_48	no
DP	DP07	cluster_48	no
DP	DP09	cluster_48	no
DP	DP10	cluster_48	no
DP	DP12	cluster_48	no
DP	DP13	cluster_48	no
DP	DP15	cluster_48	no
DP	DP16	cluster_48	no
DP	DP20	cluster_48	no
DP	DP21	cluster_48	no
DP	DP23	cluster_48	yes
DP	DP24	cluster_48	no
DP	DP25	cluster_48	no
DP	DP28	cluster_48	no
DP	DP29	cluster_48	no
DP	DP31	cluster_48	no
DP	DP32	cluster_48	no
DP	DP33	cluster_48	no
DP	DP34	cluster_48	no
KG	KG03	cluster_48	yes
KG	KG05	cluster_48	no
KG	KG07	cluster_48	yes
KG	KG12	cluster_48	no
KG	KG14	cluster_48	yes
KG	KG15	cluster_48	no
KG	KG18	cluster_48	no
KG	KG19	cluster_48	no
KG	KG20	cluster_48	yes
KG	KG22	cluster_48	no
KG	KG24	cluster_48	yes
KG	KG26	cluster_48	no
KG	KG29	cluster_48	yes
KG	KG32	cluster_48	no
KG	KG33	cluster_48	no
KG	KG35	cluster_48	no
KG	KG41	cluster_48	no
KG	KG42	cluster_48	no
KG	KG43	cluster_48	no
KG	KG44	cluster_48	no
SN	SN03	cluster_48	no
SN	SN04	cluster_48	no
SN	SN08	cluster_48	no
SN	SN09	cluster_48	yes
SN	SN10	cluster_48	no
SN	SN11	cluster_48	no
SN	SN12	cluster_48	no
SN	SN13	cluster_48	yes
SN	SN14	cluster_48	no
SN	SN15	cluster_48	yes
SN	SN16	cluster_48	no
SN	SN17	cluster_48	no
SN	SN18	cluster_48	yes
SN	SN19	cluster_48	no
SN	SN20	cluster_48	yes
SN	SN21	cluster_48	no
SN	SN23	cluster_48	no
SN	SN24	cluster_48	no
SN	SN26	cluster_48	no
CHT	CHT01	cluster_48	no
CHT	CHT02	cluster_48	no
CHT	CHT03	cluster_48	no
CHT	CHT04	cluster_48	no
CHT	CHT05	cluster_48	no
CHT	CHT06	cluster_48	no
CHT	CHT07	cluster_48	no
CHT	CHT08	cluster_48	no
CHT	CHT10	cluster_48	no
CHT	CHT11	cluster_48	no
CHT	CHT12	cluster_48	no
CHT	CHT14	cluster_48	no
CHT	CHT15	cluster_48	no
CHT	CHT16	cluster_48	no
CHT	CHT19	cluster_48	no
CHT	CHT23	cluster_48	no
CHT	CHT26	cluster_48	no
CHT	CHT28	cluster_48	no
TU	TU01	cluster_51	no
TU	TU02	cluster_51	no
TU	TU03	cluster_51	no
TU	TU06	cluster_51	no
TU	TU08	cluster_51	no
TU	TU10	cluster_51	no
TU	TU12	cluster_51	no
TU	TU14	cluster_51	no
CGN	CGN1	cluster_51	no
CGN	CGN2	cluster_51	no
CGN	CGN3	cluster_51	no
CGN	CGN4	cluster_51	no
CGN	CGN5	cluster_51	no
CGN	CGN6	cluster_51	no
CGN	CGN7	cluster_51	no
CGN	CGN8	cluster_51	no
DP	DP03	cluster_51	no
DP	DP05	cluster_51	no
DP	DP07	cluster_51	no
DP	DP09	cluster_51	no
DP	DP10	cluster_51	no
DP	DP12	cluster_51	no
DP	DP13	cluster_51	no
DP	DP15	cluster_51	no
DP	DP16	cluster_51	no
DP	DP20	cluster_51	no
DP	DP21	cluster_51	no
DP	DP23	cluster_51	no
DP	DP24	cluster_51	no
DP	DP25	cluster_51	no
DP	DP28	cluster_51	no
DP	DP29	cluster_51	no
DP	DP31	cluster_51	no
DP	DP32	cluster_51	no
DP	DP33	cluster_51	no
DP	DP34	cluster_51	no
KG	KG03	cluster_51	no
KG	KG05	cluster_51	no
KG	KG07	cluster_51	no
KG	KG12	cluster_51	no
KG	KG14	cluster_51	no
KG	KG15	cluster_51	no
KG	KG18	cluster_51	no
KG	KG19	cluster_51	no
KG	KG20	cluster_51	no
KG	KG22	cluster_51	no
KG	KG24	cluster_51	no
KG	KG26	cluster_51	no
KG	KG29	cluster_51	no
KG	KG32	cluster_51	no
KG	KG33	cluster_51	no
KG	KG35	cluster_51	no
KG	KG41	cluster_51	no
KG	KG42	cluster_51	no
KG	KG43	cluster_51	no
KG	KG44	cluster_51	no
SN	SN03	cluster_51	no
SN	SN04	cluster_51	no
SN	SN08	cluster_51	yes
SN	SN09	cluster_51	no
SN	SN10	cluster_51	no
SN	SN11	cluster_51	no
SN	SN12	cluster_51	no
SN	SN13	cluster_51	no
SN	SN14	cluster_51	no
SN	SN15	cluster_51	no
SN	SN16	cluster_51	no
SN	SN17	cluster_51	no
SN	SN18	cluster_51	no
SN	SN19	cluster_51	no
SN	SN20	cluster_51	yes
SN	SN21	cluster_51	no
SN	SN23	cluster_51	no
SN	SN24	cluster_51	yes
SN	SN26	cluster_51	no
CHT	CHT01	cluster_51	no
CHT	CHT02	cluster_51	no
CHT	CHT03	cluster_51	no
CHT	CHT04	cluster_51	no
CHT	CHT05	cluster_51	no
CHT	CHT06	cluster_51	no
CHT	CHT07	cluster_51	no
CHT	CHT08	cluster_51	no
CHT	CHT10	cluster_51	no
CHT	CHT11	cluster_51	yes
CHT	CHT12	cluster_51	no
CHT	CHT14	cluster_51	no
CHT	CHT15	cluster_51	yes
CHT	CHT16	cluster_51	no
CHT	CHT19	cluster_51	no
CHT	CHT23	cluster_51	no
CHT	CHT26	cluster_51	no
CHT	CHT28	cluster_51	no
TU	TU01	cluster_52	no
TU	TU02	cluster_52	no
TU	TU03	cluster_52	no
TU	TU06	cluster_52	no
TU	TU08	cluster_52	no
TU	TU10	cluster_52	no
TU	TU12	cluster_52	no
TU	TU14	cluster_52	yes
CGN	CGN1	cluster_52	yes
CGN	CGN2	cluster_52	yes
CGN	CGN3	cluster_52	yes
CGN	CGN4	cluster_52	yes
CGN	CGN5	cluster_52	yes
CGN	CGN6	cluster_52	yes
CGN	CGN7	cluster_52	yes
CGN	CGN8	cluster_52	yes
DP	DP03	cluster_52	no
DP	DP05	cluster_52	no
DP	DP07	cluster_52	no
DP	DP09	cluster_52	no
DP	DP10	cluster_52	no
DP	DP12	cluster_52	no
DP	DP13	cluster_52	no
DP	DP15	cluster_52	no
DP	DP16	cluster_52	no
DP	DP20	cluster_52	no
DP	DP21	cluster_52	no
DP	DP23	cluster_52	no
DP	DP24	cluster_52	no
DP	DP25	cluster_52	no
DP	DP28	cluster_52	no
DP	DP29	cluster_52	no
DP	DP31	cluster_52	no
DP	DP32	cluster_52	no
DP	DP33	cluster_52	yes
DP	DP34	cluster_52	no
KG	KG03	cluster_52	no
KG	KG05	cluster_52	no
KG	KG07	cluster_52	yes
KG	KG12	cluster_52	yes
KG	KG14	cluster_52	no
KG	KG15	cluster_52	yes
KG	KG18	cluster_52	yes
KG	KG19	cluster_52	no
KG	KG20	cluster_52	no
KG	KG22	cluster_52	no
KG	KG24	cluster_52	yes
KG	KG26	cluster_52	yes
KG	KG29	cluster_52	no
KG	KG32	cluster_52	no
KG	KG33	cluster_52	yes
KG	KG35	cluster_52	yes
KG	KG41	cluster_52	yes
KG	KG42	cluster_52	no
KG	KG43	cluster_52	no
KG	KG44	cluster_52	yes
SN	SN03	cluster_52	no
SN	SN04	cluster_52	no
SN	SN08	cluster_52	yes
SN	SN09	cluster_52	no
SN	SN10	cluster_52	no
SN	SN11	cluster_52	yes
SN	SN12	cluster_52	yes
SN	SN13	cluster_52	no
SN	SN14	cluster_52	yes
SN	SN15	cluster_52	no
SN	SN16	cluster_52	yes
SN	SN17	cluster_52	no
SN	SN18	cluster_52	yes
SN	SN19	cluster_52	no
SN	SN20	cluster_52	yes
SN	SN21	cluster_52	yes
SN	SN23	cluster_52	yes
SN	SN24	cluster_52	yes
SN	SN26	cluster_52	no
CHT	CHT01	cluster_52	no
CHT	CHT02	cluster_52	no
CHT	CHT03	cluster_52	no
CHT	CHT04	cluster_52	no
CHT	CHT05	cluster_52	no
CHT	CHT06	cluster_52	no
CHT	CHT07	cluster_52	no
CHT	CHT08	cluster_52	no
CHT	CHT10	cluster_52	no
CHT	CHT11	cluster_52	yes
CHT	CHT12	cluster_52	no
CHT	CHT14	cluster_52	yes
CHT	CHT15	cluster_52	no
CHT	CHT16	cluster_52	yes
CHT	CHT19	cluster_52	no
CHT	CHT23	cluster_52	no
CHT	CHT26	cluster_52	no
CHT	CHT28	cluster_52	no
TU	TU01	cluster_54	no
TU	TU02	cluster_54	no
TU	TU03	cluster_54	no
TU	TU06	cluster_54	no
TU	TU08	cluster_54	no
TU	TU10	cluster_54	no
TU	TU12	cluster_54	no
TU	TU14	cluster_54	no
CGN	CGN1	cluster_54	yes
CGN	CGN2	cluster_54	yes
CGN	CGN3	cluster_54	no
CGN	CGN4	cluster_54	yes
CGN	CGN5	cluster_54	yes
CGN	CGN6	cluster_54	yes
CGN	CGN7	cluster_54	yes
CGN	CGN8	cluster_54	yes
DP	DP03	cluster_54	no
DP	DP05	cluster_54	no
DP	DP07	cluster_54	yes
DP	DP09	cluster_54	no
DP	DP10	cluster_54	no
DP	DP12	cluster_54	no
DP	DP13	cluster_54	no
DP	DP15	cluster_54	no
DP	DP16	cluster_54	no
DP	DP20	cluster_54	no
DP	DP21	cluster_54	no
DP	DP23	cluster_54	no
DP	DP24	cluster_54	no
DP	DP25	cluster_54	no
DP	DP28	cluster_54	no
DP	DP29	cluster_54	no
DP	DP31	cluster_54	no
DP	DP32	cluster_54	no
DP	DP33	cluster_54	yes
DP	DP34	cluster_54	no
KG	KG03	cluster_54	no
KG	KG05	cluster_54	yes
KG	KG07	cluster_54	no
KG	KG12	cluster_54	yes
KG	KG14	cluster_54	no
KG	KG15	cluster_54	yes
KG	KG18	cluster_54	no
KG	KG19	cluster_54	no
KG	KG20	cluster_54	no
KG	KG22	cluster_54	yes
[truncated: 63,536 more rows]

## Sheet: fig3S1_B30.2_presence
Population	Fish	Orthocluster	Present	NLR
TU	TU01	cluster_4	no	no
TU	TU02	cluster_4	no	no
TU	TU03	cluster_4	no	no
TU	TU06	cluster_4	no	no
TU	TU08	cluster_4	no	no
TU	TU10	cluster_4	no	no
TU	TU12	cluster_4	no	no
TU	TU14	cluster_4	no	no
CGN	CGN1	cluster_4	yes	no
CGN	CGN2	cluster_4	no	no
CGN	CGN3	cluster_4	yes	no
CGN	CGN4	cluster_4	no	no
CGN	CGN5	cluster_4	yes	no
CGN	CGN6	cluster_4	yes	no
CGN	CGN7	cluster_4	yes	no
CGN	CGN8	cluster_4	no	no
DP	DP03	cluster_4	no	no
DP	DP05	cluster_4	no	no
DP	DP07	cluster_4	no	no
DP	DP09	cluster_4	no	no
DP	DP10	cluster_4	no	no
DP	DP12	cluster_4	no	no
DP	DP13	cluster_4	no	no
DP	DP15	cluster_4	no	no
DP	DP16	cluster_4	no	no
DP	DP20	cluster_4	yes	no
DP	DP21	cluster_4	no	no
DP	DP23	cluster_4	no	no
DP	DP24	cluster_4	no	no
DP	DP25	cluster_4	yes	no
DP	DP28	cluster_4	no	no
DP	DP29	cluster_4	no	no
DP	DP31	cluster_4	no	no
DP	DP32	cluster_4	no	no
DP	DP33	cluster_4	no	no
DP	DP34	cluster_4	no	no
KG	KG03	cluster_4	yes	no
KG	KG05	cluster_4	yes	no
KG	KG07	cluster_4	yes	no
KG	KG12	cluster_4	yes	no
KG	KG14	cluster_4	yes	no
KG	KG15	cluster_4	yes	no
KG	KG18	cluster_4	yes	no
KG	KG19	cluster_4	yes	no
KG	KG20	cluster_4	yes	no
KG	KG22	cluster_4	yes	no
KG	KG24	cluster_4	yes	no
KG	KG26	cluster_4	no	no
KG	KG29	cluster_4	no	no
KG	KG32	cluster_4	yes	no
KG	KG33	cluster_4	yes	no
KG	KG35	cluster_4	yes	no
KG	KG41	cluster_4	no	no
KG	KG42	cluster_4	yes	no
KG	KG43	cluster_4	yes	no
KG	KG44	cluster_4	no	no
SN	SN03	cluster_4	no	no
SN	SN04	cluster_4	yes	no
SN	SN08	cluster_4	yes	no
SN	SN09	cluster_4	yes	no
SN	SN10	cluster_4	yes	no
SN	SN11	cluster_4	yes	no
SN	SN12	cluster_4	yes	no
SN	SN13	cluster_4	no	no
SN	SN14	cluster_4	yes	no
SN	SN15	cluster_4	yes	no
SN	SN16	cluster_4	no	no
SN	SN17	cluster_4	yes	no
SN	SN18	cluster_4	yes	no
SN	SN19	cluster_4	yes	no
SN	SN20	cluster_4	yes	no
SN	SN21	cluster_4	no	no
SN	SN23	cluster_4	yes	no
SN	SN24	cluster_4	yes	no
SN	SN26	cluster_4	no	no
CHT	CHT01	cluster_4	no	no
CHT	CHT02	cluster_4	no	no
CHT	CHT03	cluster_4	no	no
CHT	CHT04	cluster_4	no	no
CHT	CHT05	cluster_4	no	no
CHT	CHT06	cluster_4	no	no
CHT	CHT07	cluster_4	no	no
CHT	CHT08	cluster_4	no	no
CHT	CHT10	cluster_4	no	no
CHT	CHT11	cluster_4	no	no
CHT	CHT12	cluster_4	no	no
CHT	CHT14	cluster_4	no	no
CHT	CHT15	cluster_4	no	no
CHT	CHT16	cluster_4	no	no
CHT	CHT19	cluster_4	no	no
CHT	CHT23	cluster_4	no	no
CHT	CHT26	cluster_4	no	no
CHT	CHT28	cluster_4	no	no
TU	TU01	cluster_6	no	no
TU	TU02	cluster_6	yes	no
TU	TU03	cluster_6	no	no
TU	TU06	cluster_6	yes	no
TU	TU08	cluster_6	no	no
TU	TU10	cluster_6	yes	no
TU	TU12	cluster_6	no	no
TU	TU14	cluster_6	no	no
CGN	CGN1	cluster_6	yes	no
CGN	CGN2	cluster_6	yes	no
CGN	CGN3	cluster_6	yes	no
CGN	CGN4	cluster_6	yes	no
CGN	CGN5	cluster_6	yes	no
CGN	CGN6	cluster_6	yes	no
CGN	CGN7	cluster_6	yes	no
CGN	CGN8	cluster_6	yes	no
DP	DP03	cluster_6	no	no
DP	DP05	cluster_6	yes	no
DP	DP07	cluster_6	yes	no
DP	DP09	cluster_6	yes	no
DP	DP10	cluster_6	yes	no
DP	DP12	cluster_6	yes	no
DP	DP13	cluster_6	yes	no
DP	DP15	cluster_6	yes	no
DP	DP16	cluster_6	yes	no
DP	DP20	cluster_6	yes	no
DP	DP21	cluster_6	yes	no
DP	DP23	cluster_6	yes	no
DP	DP24	cluster_6	yes	no
DP	DP25	cluster_6	yes	no
DP	DP28	cluster_6	yes	no
DP	DP29	cluster_6	yes	no
DP	DP31	cluster_6	yes	no
DP	DP32	cluster_6	yes	no
DP	DP33	cluster_6	yes	no
DP	DP34	cluster_6	yes	no
KG	KG03	cluster_6	yes	no
KG	KG05	cluster_6	yes	no
KG	KG07	cluster_6	yes	no
KG	KG12	cluster_6	yes	no
KG	KG14	cluster_6	yes	no
KG	KG15	cluster_6	yes	no
KG	KG18	cluster_6	yes	no
KG	KG19	cluster_6	yes	no
KG	KG20	cluster_6	yes	no
KG	KG22	cluster_6	yes	no
KG	KG24	cluster_6	yes	no
KG	KG26	cluster_6	yes	no
KG	KG29	cluster_6	yes	no
KG	KG32	cluster_6	yes	no
KG	KG33	cluster_6	yes	no
KG	KG35	cluster_6	yes	no
KG	KG41	cluster_6	yes	no
KG	KG42	cluster_6	yes	no
KG	KG43	cluster_6	yes	no
KG	KG44	cluster_6	yes	no
SN	SN03	cluster_6	yes	no
SN	SN04	cluster_6	yes	no
SN	SN08	cluster_6	yes	no
SN	SN09	cluster_6	yes	no
SN	SN10	cluster_6	yes	no
SN	SN11	cluster_6	yes	no
SN	SN12	cluster_6	yes	no
SN	SN13	cluster_6	yes	no
SN	SN14	cluster_6	yes	no
SN	SN15	cluster_6	yes	no
SN	SN16	cluster_6	yes	no
SN	SN17	cluster_6	yes	no
SN	SN18	cluster_6	yes	no
SN	SN19	cluster_6	yes	no
SN	SN20	cluster_6	yes	no
SN	SN21	cluster_6	yes	no
SN	SN23	cluster_6	yes	no
SN	SN24	cluster_6	yes	no
SN	SN26	cluster_6	yes	no
CHT	CHT01	cluster_6	yes	no
CHT	CHT02	cluster_6	yes	no
CHT	CHT03	cluster_6	yes	no
CHT	CHT04	cluster_6	yes	no
CHT	CHT05	cluster_6	yes	no
CHT	CHT06	cluster_6	yes	no
CHT	CHT07	cluster_6	yes	no
CHT	CHT08	cluster_6	yes	no
CHT	CHT10	cluster_6	yes	no
CHT	CHT11	cluster_6	yes	no
CHT	CHT12	cluster_6	yes	no
CHT	CHT14	cluster_6	no	no
CHT	CHT15	cluster_6	yes	no
CHT	CHT16	cluster_6	yes	no
CHT	CHT19	cluster_6	yes	no
CHT	CHT23	cluster_6	yes	no
CHT	CHT26	cluster_6	yes	no
CHT	CHT28	cluster_6	yes	no
TU	TU01	cluster_40	yes	yes
TU	TU02	cluster_40	yes	yes
TU	TU03	cluster_40	yes	yes
TU	TU06	cluster_40	yes	yes
TU	TU08	cluster_40	yes	yes
TU	TU10	cluster_40	no	yes
TU	TU12	cluster_40	yes	yes
TU	TU14	cluster_40	no	yes
CGN	CGN1	cluster_40	yes	yes
CGN	CGN2	cluster_40	yes	yes
CGN	CGN3	cluster_40	yes	yes
CGN	CGN4	cluster_40	yes	yes
CGN	CGN5	cluster_40	yes	yes
CGN	CGN6	cluster_40	yes	yes
CGN	CGN7	cluster_40	yes	yes
CGN	CGN8	cluster_40	yes	yes
DP	DP03	cluster_40	no	yes
DP	DP05	cluster_40	no	yes
DP	DP07	cluster_40	no	yes
DP	DP09	cluster_40	no	yes
DP	DP10	cluster_40	no	yes
DP	DP12	cluster_40	no	yes
DP	DP13	cluster_40	no	yes
DP	DP15	cluster_40	no	yes
DP	DP16	cluster_40	no	yes
DP	DP20	cluster_40	no	yes
DP	DP21	cluster_40	no	yes
DP	DP23	cluster_40	no	yes
DP	DP24	cluster_40	no	yes
DP	DP25	cluster_40	no	yes
DP	DP28	cluster_40	no	yes
DP	DP29	cluster_40	no	yes
DP	DP31	cluster_40	no	yes
DP	DP32	cluster_40	yes	yes
DP	DP33	cluster_40	no	yes
DP	DP34	cluster_40	no	yes
KG	KG03	cluster_40	yes	yes
KG	KG05	cluster_40	yes	yes
KG	KG07	cluster_40	yes	yes
KG	KG12	cluster_40	yes	yes
KG	KG14	cluster_40	no	yes
KG	KG15	cluster_40	yes	yes
KG	KG18	cluster_40	no	yes
KG	KG19	cluster_40	no	yes
KG	KG20	cluster_40	no	yes
KG	KG22	cluster_40	no	yes
KG	KG24	cluster_40	yes	yes
KG	KG26	cluster_40	no	yes
KG	KG29	cluster_40	yes	yes
KG	KG32	cluster_40	yes	yes
KG	KG33	cluster_40	no	yes
KG	KG35	cluster_40	no	yes
KG	KG41	cluster_40	no	yes
KG	KG42	cluster_40	no	yes
KG	KG43	cluster_40	no	yes
KG	KG44	cluster_40	no	yes
SN	SN03	cluster_40	yes	yes
SN	SN04	cluster_40	yes	yes
SN	SN08	cluster_40	yes	yes
SN	SN09	cluster_40	no	yes
SN	SN10	cluster_40	yes	yes
SN	SN11	cluster_40	no	yes
SN	SN12	cluster_40	yes	yes
SN	SN13	cluster_40	yes	yes
SN	SN14	cluster_40	no	yes
SN	SN15	cluster_40	no	yes
SN	SN16	cluster_40	no	yes
SN	SN17	cluster_40	yes	yes
SN	SN18	cluster_40	yes	yes
SN	SN19	cluster_40	no	yes
SN	SN20	cluster_40	no	yes
SN	SN21	cluster_40	no	yes
SN	SN23	cluster_40	no	yes
SN	SN24	cluster_40	no	yes
SN	SN26	cluster_40	no	yes
CHT	CHT01	cluster_40	no	yes
CHT	CHT02	cluster_40	yes	yes
CHT	CHT03	cluster_40	no	yes
CHT	CHT04	cluster_40	no	yes
CHT	CHT05	cluster_40	no	yes
CHT	CHT06	cluster_40	no	yes
CHT	CHT07	cluster_40	no	yes
CHT	CHT08	cluster_40	no	yes
CHT	CHT10	cluster_40	no	yes
CHT	CHT11	cluster_40	no	yes
CHT	CHT12	cluster_40	no	yes
CHT	CHT14	cluster_40	no	yes
CHT	CHT15	cluster_40	no	yes
CHT	CHT16	cluster_40	no	yes
CHT	CHT19	cluster_40	no	yes
CHT	CHT23	cluster_40	no	yes
CHT	CHT26	cluster_40	no	yes
CHT	CHT28	cluster_40	no	yes
TU	TU01	cluster_42	yes	no
TU	TU02	cluster_42	yes	no
TU	TU03	cluster_42	yes	no
TU	TU06	cluster_42	yes	no
TU	TU08	cluster_42	yes	no
TU	TU10	cluster_42	yes	no
TU	TU12	cluster_42	yes	no
TU	TU14	cluster_42	no	no
CGN	CGN1	cluster_42	yes	no
CGN	CGN2	cluster_42	no	no
CGN	CGN3	cluster_42	yes	no
CGN	CGN4	cluster_42	yes	no
CGN	CGN5	cluster_42	yes	no
CGN	CGN6	cluster_42	yes	no
CGN	CGN7	cluster_42	no	no
CGN	CGN8	cluster_42	yes	no
DP	DP03	cluster_42	no	no
DP	DP05	cluster_42	no	no
DP	DP07	cluster_42	no	no
DP	DP09	cluster_42	no	no
DP	DP10	cluster_42	no	no
DP	DP12	cluster_42	no	no
DP	DP13	cluster_42	no	no
DP	DP15	cluster_42	no	no
DP	DP16	cluster_42	yes	no
DP	DP20	cluster_42	no	no
DP	DP21	cluster_42	no	no
DP	DP23	cluster_42	no	no
DP	DP24	cluster_42	no	no
DP	DP25	cluster_42	no	no
DP	DP28	cluster_42	no	no
DP	DP29	cluster_42	no	no
DP	DP31	cluster_42	no	no
DP	DP32	cluster_42	no	no
DP	DP33	cluster_42	no	no
DP	DP34	cluster_42	no	no
KG	KG03	cluster_42	no	no
KG	KG05	cluster_42	no	no
KG	KG07	cluster_42	no	no
KG	KG12	cluster_42	no	no
KG	KG14	cluster_42	no	no
KG	KG15	cluster_42	no	no
KG	KG18	cluster_42	no	no
KG	KG19	cluster_42	no	no
KG	KG20	cluster_42	no	no
KG	KG22	cluster_42	yes	no
KG	KG24	cluster_42	no	no
KG	KG26	cluster_42	no	no
KG	KG29	cluster_42	no	no
KG	KG32	cluster_42	no	no
KG	KG33	cluster_42	no	no
KG	KG35	cluster_42	no	no
KG	KG41	cluster_42	no	no
KG	KG42	cluster_42	no	no
KG	KG43	cluster_42	no	no
KG	KG44	cluster_42	no	no
SN	SN03	cluster_42	no	no
SN	SN04	cluster_42	no	no
SN	SN08	cluster_42	no	no
SN	SN09	cluster_42	no	no
SN	SN10	cluster_42	no	no
SN	SN11	cluster_42	no	no
SN	SN12	cluster_42	no	no
SN	SN13	cluster_42	no	no
SN	SN14	cluster_42	no	no
SN	SN15	cluster_42	no	no
SN	SN16	cluster_42	no	no
SN	SN17	cluster_42	no	no
SN	SN18	cluster_42	no	no
SN	SN19	cluster_42	no	no
SN	SN20	cluster_42	no	no
SN	SN21	cluster_42	no	no
SN	SN23	cluster_42	no	no
SN	SN24	cluster_42	no	no
SN	SN26	cluster_42	no	no
CHT	CHT01	cluster_42	no	no
CHT	CHT02	cluster_42	no	no
CHT	CHT03	cluster_42	no	no
CHT	CHT04	cluster_42	no	no
CHT	CHT05	cluster_42	no	no
CHT	CHT06	cluster_42	no	no
CHT	CHT07	cluster_42	no	no
CHT	CHT08	cluster_42	no	no
CHT	CHT10	cluster_42	no	no
CHT	CHT11	cluster_42	no	no
CHT	CHT12	cluster_42	no	no
CHT	CHT14	cluster_42	no	no
CHT	CHT15	cluster_42	yes	no
CHT	CHT16	cluster_42	no	no
CHT	CHT19	cluster_42	no	no
CHT	CHT23	cluster_42	no	no
CHT	CHT26	cluster_42	no	no
CHT	CHT28	cluster_42	no	no
TU	TU01	cluster_44	yes	no
TU	TU02	cluster_44	yes	no
TU	TU03	cluster_44	no	no
TU	TU06	cluster_44	yes	no
TU	TU08	cluster_44	no	no
TU	TU10	cluster_44	no	no
TU	TU12	cluster_44	no	no
TU	TU14	cluster_44	no	no
CGN	CGN1	cluster_44	yes	no
CGN	CGN2	cluster_44	no	no
CGN	CGN3	cluster_44	no	no
CGN	CGN4	cluster_44	no	no
CGN	CGN5	cluster_44	no	no
CGN	CGN6	cluster_44	no	no
CGN	CGN7	cluster_44	yes	no
CGN	CGN8	cluster_44	yes	no
DP	DP03	cluster_44	no	no
DP	DP05	cluster_44	yes	no
DP	DP07	cluster_44	no	no
DP	DP09	cluster_44	no	no
DP	DP10	cluster_44	no	no
DP	DP12	cluster_44	no	no
DP	DP13	cluster_44	no	no
DP	DP15	cluster_44	no	no
DP	DP16	cluster_44	yes	no
DP	DP20	cluster_44	yes	no
DP	DP21	cluster_44	no	no
DP	DP23	cluster_44	no	no
DP	DP24	cluster_44	no	no
DP	DP25	cluster_44	yes	no
DP	DP28	cluster_44	yes	no
DP	DP29	cluster_44	no	no
DP	DP31	cluster_44	no	no
DP	DP32	cluster_44	no	no
DP	DP33	cluster_44	yes	no
DP	DP34	cluster_44	no	no
KG	KG03	cluster_44	yes	no
KG	KG05	cluster_44	yes	no
KG	KG07	cluster_44	yes	no
KG	KG12	cluster_44	yes	no
KG	KG14	cluster_44	yes	no
KG	KG15	cluster_44	yes	no
KG	KG18	cluster_44	yes	no
KG	KG19	cluster_44	yes	no
KG	KG20	cluster_44	yes	no
KG	KG22	cluster_44	yes	no
KG	KG24	cluster_44	yes	no
KG	KG26	cluster_44	yes	no
KG	KG29	cluster_44	yes	no
KG	KG32	cluster_44	yes	no
KG	KG33	cluster_44	yes	no
KG	KG35	cluster_44	no	no
KG	KG41	cluster_44	no	no
KG	KG42	cluster_44	no	no
KG	KG43	cluster_44	no	no
KG	KG44	cluster_44	yes	no
SN	SN03	cluster_44	yes	no
SN	SN04	cluster_44	yes	no
SN	SN08	cluster_44	yes	no
SN	SN09	cluster_44	yes	no
SN	SN10	cluster_44	yes	no
SN	SN11	cluster_44	no	no
SN	SN12	cluster_44	yes	no
SN	SN13	cluster_44	yes	no
SN	SN14	cluster_44	yes	no
SN	SN15	cluster_44	yes	no
SN	SN16	cluster_44	yes	no
SN	SN17	cluster_44	yes	no
SN	SN18	cluster_44	no	no
SN	SN19	cluster_44	no	no
SN	SN20	cluster_44	yes	no
SN	SN21	cluster_44	yes	no
SN	SN23	cluster_44	yes	no
SN	SN24	cluster_44	yes	no
SN	SN26	cluster_44	yes	no
CHT	CHT01	cluster_44	no	no
CHT	CHT02	cluster_44	yes	no
CHT	CHT03	cluster_44	no	no
CHT	CHT04	cluster_44	no	no
CHT	CHT05	cluster_44	no	no
CHT	CHT06	cluster_44	no	no
CHT	CHT07	cluster_44	no	no
CHT	CHT08	cluster_44	no	no
CHT	CHT10	cluster_44	no	no
CHT	CHT11	cluster_44	no	no
CHT	CHT12	cluster_44	yes	no
CHT	CHT14	cluster_44	no	no
CHT	CHT15	cluster_44	no	no
CHT	CHT16	cluster_44	no	no
CHT	CHT19	cluster_44	no	no
CHT	CHT23	cluster_44	no	no
CHT	CHT26	cluster_44	no	no
CHT	CHT28	cluster_44	no	no
TU	TU01	cluster_48	no	yes
TU	TU02	cluster_48	no	yes
TU	TU03	cluster_48	no	yes
TU	TU06	cluster_48	no	yes
TU	TU08	cluster_48	no	yes
TU	TU10	cluster_48	no	yes
TU	TU12	cluster_48	no	yes
TU	TU14	cluster_48	no	yes
CGN	CGN1	cluster_48	yes	yes
CGN	CGN2	cluster_48	yes	yes
CGN	CGN3	cluster_48	yes	yes
CGN	CGN4	cluster_48	no	yes
CGN	CGN5	cluster_48	yes	yes
CGN	CGN6	cluster_48	no	yes
CGN	CGN7	cluster_48	yes	yes
CGN	CGN8	cluster_48	yes	yes
DP	DP03	cluster_48	no	yes
DP	DP05	cluster_48	no	yes
DP	DP07	cluster_48	no	yes
DP	DP09	cluster_48	no	yes
DP	DP10	cluster_48	no	yes
DP	DP12	cluster_48	no	yes
DP	DP13	cluster_48	no	yes
DP	DP15	cluster_48	no	yes
DP	DP16	cluster_48	no	yes
DP	DP20	cluster_48	no	yes
DP	DP21	cluster_48	no	yes
DP	DP23	cluster_48	no	yes
DP	DP24	cluster_48	no	yes
DP	DP25	cluster_48	no	yes
DP	DP28	cluster_48	no	yes
DP	DP29	cluster_48	no	yes
DP	DP31	cluster_48	no	yes
DP	DP32	cluster_48	no	yes
DP	DP33	cluster_48	no	yes
DP	DP34	cluster_48	no	yes
KG	KG03	cluster_48	no	yes
KG	KG05	cluster_48	no	yes
KG	KG07	cluster_48	no	yes
KG	KG12	cluster_48	no	yes
KG	KG14	cluster_48	no	yes
KG	KG15	cluster_48	yes	yes
KG	KG18	cluster_48	no	yes
KG	KG19	cluster_48	no	yes
KG	KG20	cluster_48	no	yes
KG	KG22	cluster_48	no	yes
KG	KG24	cluster_48	no	yes
KG	KG26	cluster_48	no	yes
KG	KG29	cluster_48	no	yes
KG	KG32	cluster_48	no	yes
KG	KG33	cluster_48	no	yes
KG	KG35	cluster_48	no	yes
KG	KG41	cluster_48	no	yes
KG	KG42	cluster_48	no	yes
KG	KG43	cluster_48	no	yes
KG	KG44	cluster_48	no	yes
SN	SN03	cluster_48	no	yes
SN	SN04	cluster_48	no	yes
SN	SN08	cluster_48	no	yes
SN	SN09	cluster_48	no	yes
SN	SN10	cluster_48	no	yes
SN	SN11	cluster_48	no	yes
SN	SN12	cluster_48	no	yes
SN	SN13	cluster_48	no	yes
SN	SN14	cluster_48	no	yes
SN	SN15	cluster_48	no	yes
SN	SN16	cluster_48	no	yes
SN	SN17	cluster_48	no	yes
SN	SN18	cluster_48	no	yes
SN	SN19	cluster_48	no	yes
SN	SN20	cluster_48	no	yes
SN	SN21	cluster_48	no	yes
SN	SN23	cluster_48	no	yes
SN	SN24	cluster_48	no	yes
SN	SN26	cluster_48	no	yes
CHT	CHT01	cluster_48	no	yes
CHT	CHT02	cluster_48	no	yes
CHT	CHT03	cluster_48	no	yes
CHT	CHT04	cluster_48	no	yes
CHT	CHT05	cluster_48	yes	yes
CHT	CHT06	cluster_48	no	yes
CHT	CHT07	cluster_48	no	yes
CHT	CHT08	cluster_48	no	yes
CHT	CHT10	cluster_48	no	yes
CHT	CHT11	cluster_48	no	yes
CHT	CHT12	cluster_48	no	yes
CHT	CHT14	cluster_48	no	yes
CHT	CHT15	cluster_48	no	yes
CHT	CHT16	cluster_48	no	yes
CHT	CHT19	cluster_48	no	yes
CHT	CHT23	cluster_48	no	yes
CHT	CHT26	cluster_48	no	yes
CHT	CHT28	cluster_48	no	yes
TU	TU01	cluster_49	yes	no
TU	TU02	cluster_49	no	no
TU	TU03	cluster_49	no	no
TU	TU06	cluster_49	no	no
TU	TU08	cluster_49	no	no
TU	TU10	cluster_49	no	no
TU	TU12	cluster_49	no	no
TU	TU14	cluster_49	no	no
CGN	CGN1	cluster_49	yes	no
CGN	CGN2	cluster_49	no	no
CGN	CGN3	cluster_49	no	no
CGN	CGN4	cluster_49	no	no
CGN	CGN5	cluster_49	no	no
CGN	CGN6	cluster_49	yes	no
CGN	CGN7	cluster_49	no	no
CGN	CGN8	cluster_49	no	no
DP	DP03	cluster_49	no	no
DP	DP05	cluster_49	yes	no
DP	DP07	cluster_49	no	no
DP	DP09	cluster_49	no	no
DP	DP10	cluster_49	yes	no
DP	DP12	cluster_49	no	no
DP	DP13	cluster_49	no	no
DP	DP15	cluster_49	no	no
DP	DP16	cluster_49	no	no
DP	DP20	cluster_49	yes	no
DP	DP21	cluster_49	yes	no
DP	DP23	cluster_49	no	no
DP	DP24	cluster_49	no	no
DP	DP25	cluster_49	no	no
DP	DP28	cluster_49	no	no
DP	DP29	cluster_49	no	no
DP	DP31	cluster_49	no	no
DP	DP32	cluster_49	no	no
DP	DP33	cluster_49	no	no
DP	DP34	cluster_49	yes	no
KG	KG03	cluster_49	yes	no
KG	KG05	cluster_49	yes	no
KG	KG07	cluster_49	yes	no
KG	KG12	cluster_49	yes	no
KG	KG14	cluster_49	yes	no
KG	KG15	cluster_49	yes	no
KG	KG18	cluster_49	yes	no
KG	KG19	cluster_49	yes	no
KG	KG20	cluster_49	yes	no
KG	KG22	cluster_49	yes	no
KG	KG24	cluster_49	yes	no
KG	KG26	cluster_49	yes	no
KG	KG29	cluster_49	yes	no
KG	KG32	cluster_49	yes	no
KG	KG33	cluster_49	yes	no
KG	KG35	cluster_49	no	no
KG	KG41	cluster_49	yes	no
KG	KG42	cluster_49	no	no
KG	KG43	cluster_49	no	no
KG	KG44	cluster_49	yes	no
SN	SN03	cluster_49	yes	no
SN	SN04	cluster_49	yes	no
SN	SN08	cluster_49	yes	no
SN	SN09	cluster_49	yes	no
SN	SN10	cluster_49	yes	no
SN	SN11	cluster_49	yes	no
SN	SN12	cluster_49	yes	no
SN	SN13	cluster_49	yes	no
SN	SN14	cluster_49	yes	no
SN	SN15	cluster_49	yes	no
SN	SN16	cluster_49	yes	no
SN	SN17	cluster_49	yes	no
SN	SN18	cluster_49	yes	no
SN	SN19	cluster_49	yes	no
SN	SN20	cluster_49	yes	no
SN	SN21	cluster_49	yes	no
SN	SN23	cluster_49	yes	no
SN	SN24	cluster_49	yes	no
SN	SN26	cluster_49	yes	no
CHT	CHT01	cluster_49	yes	no
CHT	CHT02	cluster_49	yes	no
CHT	CHT03	cluster_49	yes	no
CHT	CHT04	cluster_49	yes	no
CHT	CHT05	cluster_49	yes	no
CHT	CHT06	cluster_49	yes	no
CHT	CHT07	cluster_49	yes	no
CHT	CHT08	cluster_49	yes	no
CHT	CHT10	cluster_49	yes	no
CHT	CHT11	cluster_49	yes	no
CHT	CHT12	cluster_49	yes	no
CHT	CHT14	cluster_49	yes	no
CHT	CHT15	cluster_49	yes	no
CHT	CHT16	cluster_49	yes	no
CHT	CHT19	cluster_49	yes	no
CHT	CHT23	cluster_49	yes	no
CHT	CHT26	cluster_49	yes	no
CHT	CHT28	cluster_49	no	no
TU	TU01	cluster_60	yes	no
TU	TU02	cluster_60	yes	no
TU	TU03	cluster_60	yes	no
TU	TU06	cluster_60	yes	no
TU	TU08	cluster_60	no	no
TU	TU10	cluster_60	no	no
TU	TU12	cluster_60	yes	no
TU	TU14	cluster_60	yes	no
CGN	CGN1	cluster_60	yes	no
CGN	CGN2	cluster_60	no	no
CGN	CGN3	cluster_60	yes	no
CGN	CGN4	cluster_60	yes	no
CGN	CGN5	cluster_60	yes	no
CGN	CGN6	cluster_60	yes	no
CGN	CGN7	cluster_60	yes	no
CGN	CGN8	cluster_60	yes	no
DP	DP03	cluster_60	no	no
DP	DP05	cluster_60	no	no
DP	DP07	cluster_60	yes	no
DP	DP09	cluster_60	no	no
DP	DP10	cluster_60	no	no
DP	DP12	cluster_60	yes	no
DP	DP13	cluster_60	yes	no
DP	DP15	cluster_60	no	no
DP	DP16	cluster_60	no	no
DP	DP20	cluster_60	yes	no
DP	DP21	cluster_60	yes	no
DP	DP23	cluster_60	no	no
DP	DP24	cluster_60	no	no
DP	DP25	cluster_60	no	no
DP	DP28	cluster_60	yes	no
DP	DP29	cluster_60	yes	no
DP	DP31	cluster_60	yes	no
DP	DP32	cluster_60	no	no
DP	DP33	cluster_60	no	no
DP	DP34	cluster_60	no	no
KG	KG03	cluster_60	yes	no
KG	KG05	cluster_60	yes	no
KG	KG07	cluster_60	yes	no
KG	KG12	cluster_60	yes	no
KG	KG14	cluster_60	no	no
KG	KG15	cluster_60	yes	no
KG	KG18	cluster_60	yes	no
KG	KG19	cluster_60	yes	no
KG	KG20	cluster_60	yes	no
KG	KG22	cluster_60	yes	no
KG	KG24	cluster_60	yes	no
KG	KG26	cluster_60	yes	no
KG	KG29	cluster_60	yes	no
KG	KG32	cluster_60	yes	no
KG	KG33	cluster_60	yes	no
KG	KG35	cluster_60	no	no
KG	KG41	cluster_60	no	no
KG	KG42	cluster_60	yes	no
KG	KG43	cluster_60	no	no
KG	KG44	cluster_60	yes	no
SN	SN03	cluster_60	yes	no
SN	SN04	cluster_60	yes	no
SN	SN08	cluster_60	yes	no
SN	SN09	cluster_60	yes	no
SN	SN10	cluster_60	yes	no
SN	SN11	cluster_60	yes	no
SN	SN12	cluster_60	yes	no
SN	SN13	cluster_60	yes	no
SN	SN14	cluster_60	yes	no
SN	SN15	cluster_60	yes	no
SN	SN16	cluster_60	yes	no
SN	SN17	cluster_60	yes	no
SN	SN18	cluster_60	yes	no
SN	SN19	cluster_60	yes	no
SN	SN20	cluster_60	yes	no
SN	SN21	cluster_60	yes	no
SN	SN23	cluster_60	yes	no
SN	SN24	cluster_60	yes	no
SN	SN26	cluster_60	yes	no
CHT	CHT01	cluster_60	yes	no
CHT	CHT02	cluster_60	yes	no
CHT	CHT03	cluster_60	yes	no
CHT	CHT04	cluster_60	yes	no
CHT	CHT05	cluster_60	yes	no
CHT	CHT06	cluster_60	yes	no
CHT	CHT07	cluster_60	yes	no
CHT	CHT08	cluster_60	yes	no
CHT	CHT10	cluster_60	yes	no
CHT	CHT11	cluster_60	yes	no
CHT	CHT12	cluster_60	yes	no
CHT	CHT14	cluster_60	no	no
CHT	CHT15	cluster_60	yes	no
CHT	CHT16	cluster_60	yes	no
CHT	CHT19	cluster_60	yes	no
CHT	CHT23	cluster_60	yes	no
CHT	CHT26	cluster_60	yes	no
CHT	CHT28	cluster_60	yes	no
TU	TU01	cluster_63	no	yes
TU	TU02	cluster_63	no	yes
TU	TU03	cluster_63	no	yes
TU	TU06	cluster_63	no	yes
TU	TU08	cluster_63	no	yes
TU	TU10	cluster_63	no	yes
TU	TU12	cluster_63	no	yes
TU	TU14	cluster_63	no	yes
CGN	CGN1	cluster_63	yes	yes
CGN	CGN2	cluster_63	no	yes
CGN	CGN3	cluster_63	yes	yes
CGN	CGN4	cluster_63	no	yes
CGN	CGN5	cluster_63	no	yes
CGN	CGN6	cluster_63	no	yes
CGN	CGN7	cluster_63	no	yes
CGN	CGN8	cluster_63	no	yes
DP	DP03	cluster_63	no	yes
DP	DP05	cluster_63	no	yes
DP	DP07	cluster_63	no	yes
DP	DP09	cluster_63	no	yes
DP	DP10	cluster_63	no	yes
DP	DP12	cluster_63	no	yes
DP	DP13	cluster_63	yes	yes
DP	DP15	cluster_63	no	yes
DP	DP16	cluster_63	no	yes
DP	DP20	cluster_63	no	yes
DP	DP21	cluster_63	no	yes
DP	DP23	cluster_63	no	yes
DP	DP24	cluster_63	no	yes
DP	DP25	cluster_63	no	yes
DP	DP28	cluster_63	no	yes
DP	DP29	cluster_63	no	yes
DP	DP31	cluster_63	no	yes
DP	DP32	cluster_63	no	yes
DP	DP33	cluster_63	no	yes
DP	DP34	cluster_63	no	yes
KG	KG03	cluster_63	yes	yes
KG	KG05	cluster_63	yes	yes
KG	KG07	cluster_63	yes	yes
KG	KG12	cluster_63	no	yes
KG	KG14	cluster_63	no	yes
KG	KG15	cluster_63	no	yes
KG	KG18	cluster_63	yes	yes
KG	KG19	cluster_63	no	yes
KG	KG20	cluster_63	yes	yes
KG	KG22	cluster_63	yes	yes
KG	KG24	cluster_63	yes	yes
KG	KG26	cluster_63	no	yes
KG	KG29	cluster_63	yes	yes
KG	KG32	cluster_63	no	yes
KG	KG33	cluster_63	yes	yes
KG	KG35	cluster_63	yes	yes
KG	KG41	cluster_63	no	yes
KG	KG42	cluster_63	no	yes
KG	KG43	cluster_63	no	yes
KG	KG44	cluster_63	no	yes
SN	SN03	cluster_63	no	yes
SN	SN04	cluster_63	no	yes
SN	SN08	cluster_63	no	yes
SN	SN09	cluster_63	no	yes
SN	SN10	cluster_63	yes	yes
SN	SN11	cluster_63	yes	yes
SN	SN12	cluster_63	no	yes
SN	SN13	cluster_63	yes	yes
SN	SN14	cluster_63	no	yes
SN	SN15	cluster_63	yes	yes
SN	SN16	cluster_63	yes	yes
SN	SN17	cluster_63	yes	yes
SN	SN18	cluster_63	no	yes
SN	SN19	cluster_63	no	yes
SN	SN20	cluster_63	yes	yes
SN	SN21	cluster_63	no	yes
SN	SN23	cluster_63	no	yes
SN	SN24	cluster_63	no	yes
SN	SN26	cluster_63	no	yes
CHT	CHT01	cluster_63	yes	yes
CHT	CHT02	cluster_63	no	yes
CHT	CHT03	cluster_63	no	yes
CHT	CHT04	cluster_63	no	yes
CHT	CHT05	cluster_63	no	yes
CHT	CHT06	cluster_63	no	yes
CHT	CHT07	cluster_63	yes	yes
CHT	CHT08	cluster_63	no	yes
CHT	CHT10	cluster_63	no	yes
CHT	CHT11	cluster_63	no	yes
CHT	CHT12	cluster_63	no	yes
CHT	CHT14	cluster_63	yes	yes
CHT	CHT15	cluster_63	no	yes
CHT	CHT16	cluster_63	no	yes
CHT	CHT19	cluster_63	no	yes
CHT	CHT23	cluster_63	no	yes
CHT	CHT26	cluster_63	no	yes
CHT	CHT28	cluster_63	no	yes
TU	TU01	cluster_65	no	no
TU	TU02	cluster_65	no	no
TU	TU03	cluster_65	no	no
TU	TU06	cluster_65	no	no
TU	TU08	cluster_65	no	no
TU	TU10	cluster_65	no	no
TU	TU12	cluster_65	no	no
TU	TU14	cluster_65	no	no
CGN	CGN1	cluster_65	yes	no
CGN	CGN2	cluster_65	no	no
CGN	CGN3	cluster_65	yes	no
CGN	CGN4	cluster_65	yes	no
CGN	CGN5	cluster_65	no	no
CGN	CGN6	cluster_65	yes	no
CGN	CGN7	cluster_65	no	no
CGN	CGN8	cluster_65	yes	no
DP	DP03	cluster_65	no	no
DP	DP05	cluster_65	yes	no
DP	DP07	cluster_65	yes	no
DP	DP09	cluster_65	no	no
DP	DP10	cluster_65	yes	no
DP	DP12	cluster_65	no	no
DP	DP13	cluster_65	no	no
DP	DP15	cluster_65	yes	no
DP	DP16	cluster_65	yes	no
DP	DP20	cluster_65	yes	no
DP	DP21	cluster_65	yes	no
DP	DP23	cluster_65	yes	no
DP	DP24	cluster_65	yes	no
DP	DP25	cluster_65	yes	no
DP	DP28	cluster_65	no	no
DP	DP29	cluster_65	no	no
DP	DP31	cluster_65	no	no
DP	DP32	cluster_65	no	no
DP	DP33	cluster_65	yes	no
DP	DP34	cluster_65	no	no
KG	KG03	cluster_65	yes	no
KG	KG05	cluster_65	yes	no
KG	KG07	cluster_65	yes	no
KG	KG12	cluster_65	yes	no
KG	KG14	cluster_65	yes	no
KG	KG15	cluster_65	no	no
KG	KG18	cluster_65	yes	no
KG	KG19	cluster_65	no	no
KG	KG20	cluster_65	yes	no
KG	KG22	cluster_65	yes	no
KG	KG24	cluster_65	yes	no
KG	KG26	cluster_65	no	no
KG	KG29	cluster_65	yes	no
KG	KG32	cluster_65	yes	no
KG	KG33	cluster_65	yes	no
KG	KG35	cluster_65	yes	no
KG	KG41	cluster_65	yes	no
KG	KG42	cluster_65	no	no
KG	KG43	cluster_65	yes	no
KG	KG44	cluster_65	yes	no
SN	SN03	cluster_65	yes	no
SN	SN04	cluster_65	yes	no
SN	SN08	cluster_65	yes	no
SN	SN09	cluster_65	yes	no
SN	SN10	cluster_65	yes	no
SN	SN11	cluster_65	yes	no
SN	SN12	cluster_65	no	no
SN	SN13	cluster_65	yes	no
SN	SN14	cluster_65	yes	no
SN	SN15	cluster_65	yes	no
SN	SN16	cluster_65	yes	no
SN	SN17	cluster_65	yes	no
SN	SN18	cluster_65	yes	no
SN	SN19	cluster_65	yes	no
SN	SN20	cluster_65	yes	no
SN	SN21	cluster_65	yes	no
SN	SN23	cluster_65	yes	no
SN	SN24	cluster_65	yes	no
SN	SN26	cluster_65	yes	no
CHT	CHT01	cluster_65	yes	no
CHT	CHT02	cluster_65	yes	no
CHT	CHT03	cluster_65	yes	no
CHT	CHT04	cluster_65	yes	no
CHT	CHT05	cluster_65	yes	no
CHT	CHT06	cluster_65	yes	no
CHT	CHT07	cluster_65	yes	no
CHT	CHT08	cluster_65	yes	no
CHT	CHT10	cluster_65	no	no
CHT	CHT11	cluster_65	yes	no
CHT	CHT12	cluster_65	yes	no
CHT	CHT14	cluster_65	no	no
CHT	CHT15	cluster_65	yes	no
CHT	CHT16	cluster_65	no	no
CHT	CHT19	cluster_65	no	no
CHT	CHT23	cluster_65	yes	no
CHT	CHT26	cluster_65	yes	no
CHT	CHT28	cluster_65	yes	no
TU	TU01	cluster_67	yes	no
TU	TU02	cluster_67	yes	no
TU	TU03	cluster_67	yes	no
TU	TU06	cluster_67	yes	no
TU	TU08	cluster_67	no	no
TU	TU10	cluster_67	yes	no
TU	TU12	cluster_67	no	no
TU	TU14	cluster_67	no	no
CGN	CGN1	cluster_67	yes	no
CGN	CGN2	cluster_67	yes	no
CGN	CGN3	cluster_67	yes	no
CGN	CGN4	cluster_67	yes	no
CGN	CGN5	cluster_67	yes	no
CGN	CGN6	cluster_67	yes	no
CGN	CGN7	cluster_67	no	no
CGN	CGN8	cluster_67	yes	no
DP	DP03	cluster_67	no	no
DP	DP05	cluster_67	no	no
DP	DP07	cluster_67	yes	no
DP	DP09	cluster_67	yes	no
DP	DP10	cluster_67	no	no
DP	DP12	cluster_67	no	no
DP	DP13	cluster_67	no	no
DP	DP15	cluster_67	no	no
DP	DP16	cluster_67	no	no
DP	DP20	cluster_67	no	no
DP	DP21	cluster_67	no	no
DP	DP23	cluster_67	yes	no
DP	DP24	cluster_67	no	no
DP	DP25	cluster_67	no	no
DP	DP28	cluster_67	no	no
DP	DP29	cluster_67	yes	no
DP	DP31	cluster_67	no	no
DP	DP32	cluster_67	no	no
DP	DP33	cluster_67	yes	no
DP	DP34	cluster_67	no	no
KG	KG03	cluster_67	no	no
KG	KG05	cluster_67	yes	no
KG	KG07	cluster_67	no	no
KG	KG12	cluster_67	yes	no
KG	KG14	cluster_67	no	no
KG	KG15	cluster_67	yes	no
KG	KG18	cluster_67	yes	no
KG	KG19	cluster_67	no	no
KG	KG20	cluster_67	no	no
KG	KG22	cluster_67	yes	no
KG	KG24	cluster_67	no	no
KG	KG26	cluster_67	yes	no
KG	KG29	cluster_67	no	no
KG	KG32	cluster_67	yes	no
KG	KG33	cluster_67	yes	no
KG	KG35	cluster_67	no	no
KG	KG41	cluster_67	no	no
KG	KG42	cluster_67	yes	no
KG	KG43	cluster_67	no	no
KG	KG44	cluster_67	yes	no
SN	SN03	cluster_67	no	no
SN	SN04	cluster_67	yes	no
SN	SN08	cluster_67	yes	no
SN	SN09	cluster_67	no	no
SN	SN10	cluster_67	yes	no
SN	SN11	cluster_67	yes	no
SN	SN12	cluster_67	no	no
SN	SN13	cluster_67	yes	no
SN	SN14	cluster_67	no	no
SN	SN15	cluster_67	yes	no
SN	SN16	cluster_67	yes	no
SN	SN17	cluster_67	no	no
SN	SN18	cluster_67	no	no
SN	SN19	cluster_67	no	no
SN	SN20	cluster_67	yes	no
SN	SN21	cluster_67	yes	no
SN	SN23	cluster_67	no	no
SN	SN24	cluster_67	yes	no
SN	SN26	cluster_67	no	no
CHT	CHT01	cluster_67	no	no
CHT	CHT02	cluster_67	no	no
CHT	CHT03	cluster_67	no	no
CHT	CHT04	cluster_67	no	no
CHT	CHT05	cluster_67	no	no
CHT	CHT06	cluster_67	yes	no
CHT	CHT07	cluster_67	no	no
CHT	CHT08	cluster_67	no	no
CHT	CHT10	cluster_67	yes	no
CHT	CHT11	cluster_67	no	no
CHT	CHT12	cluster_67	no	no
CHT	CHT14	cluster_67	no	no
CHT	CHT15	cluster_67	no	no
CHT	CHT16	cluster_67	no	no
CHT	CHT19	cluster_67	no	no
CHT	CHT23	cluster_67	yes	no
CHT	CHT26	cluster_67	no	no
CHT	CHT28	cluster_67	no	no
TU	TU01	cluster_80	yes	no
TU	TU02	cluster_80	yes	no
TU	TU03	cluster_80	yes	no
TU	TU06	cluster_80	yes	no
TU	TU08	cluster_80	yes	no
TU	TU10	cluster_80	yes	no
TU	TU12	cluster_80	yes	no
TU	TU14	cluster_80	yes	no
CGN	CGN1	cluster_80	yes	no
CGN	CGN2	cluster_80	yes	no
CGN	CGN3	cluster_80	yes	no
CGN	CGN4	cluster_80	yes	no
CGN	CGN5	cluster_80	yes	no
CGN	CGN6	cluster_80	yes	no
CGN	CGN7	cluster_80	yes	no
CGN	CGN8	cluster_80	yes	no
DP	DP03	cluster_80	yes	no
DP	DP05	cluster_80	no	no
DP	DP07	cluster_80	yes	no
DP	DP09	cluster_80	no	no
DP	DP10	cluster_80	yes	no
DP	DP12	cluster_80	yes	no
DP	DP13	cluster_80	yes	no
DP	DP15	cluster_80	no	no
DP	DP16	cluster_80	yes	no
DP	DP20	cluster_80	yes	no
DP	DP21	cluster_80	yes	no
DP	DP23	cluster_80	yes	no
DP	DP24	cluster_80	yes	no
DP	DP25	cluster_80	no	no
DP	DP28	cluster_80	yes	no
DP	DP29	cluster_80	yes	no
DP	DP31	cluster_80	yes	no
DP	DP32	cluster_80	yes	no
DP	DP33	cluster_80	yes	no
DP	DP34	cluster_80	no	no
KG	KG03	cluster_80	yes	no
KG	KG05	cluster_80	yes	no
KG	KG07	cluster_80	yes	no
KG	KG12	cluster_80	yes	no
KG	KG14	cluster_80	yes	no
KG	KG15	cluster_80	yes	no
KG	KG18	cluster_80	yes	no
KG	KG19	cluster_80	yes	no
KG	KG20	cluster_80	yes	no
KG	KG22	cluster_80	yes	no
KG	KG24	cluster_80	yes	no
KG	KG26	cluster_80	yes	no
KG	KG29	cluster_80	yes	no
KG	KG32	cluster_80	yes	no
KG	KG33	cluster_80	yes	no
KG	KG35	cluster_80	yes	no
KG	KG41	cluster_80	no	no
KG	KG42	cluster_80	yes	no
KG	KG43	cluster_80	yes	no
KG	KG44	cluster_80	yes	no
SN	SN03	cluster_80	yes	no
SN	SN04	cluster_80	yes	no
SN	SN08	cluster_80	yes	no
SN	SN09	cluster_80	yes	no
SN	SN10	cluster_80	yes	no
SN	SN11	cluster_80	yes	no
SN	SN12	cluster_80	yes	no
SN	SN13	cluster_80	yes	no
SN	SN14	cluster_80	yes	no
SN	SN15	cluster_80	yes	no
SN	SN16	cluster_80	yes	no
SN	SN17	cluster_80	yes	no
SN	SN18	cluster_80	yes	no
SN	SN19	cluster_80	yes	no
SN	SN20	cluster_80	yes	no
SN	SN21	cluster_80	yes	no
SN	SN23	cluster_80	yes	no
SN	SN24	cluster_80	yes	no
SN	SN26	cluster_80	yes	no
CHT	CHT01	cluster_80	yes	no
CHT	CHT02	cluster_80	yes	no
CHT	CHT03	cluster_80	yes	no
CHT	CHT04	cluster_80	yes	no
CHT	CHT05	cluster_80	yes	no
CHT	CHT06	cluster_80	yes	no
CHT	CHT07	cluster_80	yes	no
CHT	CHT08	cluster_80	yes	no
CHT	CHT10	cluster_80	yes	no
CHT	CHT11	cluster_80	yes	no
CHT	CHT12	cluster_80	yes	no
CHT	CHT14	cluster_80	no	no
CHT	CHT15	cluster_80	yes	no
CHT	CHT16	cluster_80	yes	no
CHT	CHT19	cluster_80	yes	no
CHT	CHT23	cluster_80	yes	no
CHT	CHT26	cluster_80	yes	no
CHT	CHT28	cluster_80	yes	no
TU	TU01	cluster_82	no	no
TU	TU02	cluster_82	no	no
TU	TU03	cluster_82	no	no
TU	TU06	cluster_82	no	no
TU	TU08	cluster_82	no	no
TU	TU10	cluster_82	no	no
TU	TU12	cluster_82	no	no
TU	TU14	cluster_82	no	no
CGN	CGN1	cluster_82	yes	no
CGN	CGN2	cluster_82	no	no
CGN	CGN3	cluster_82	yes	no
CGN	CGN4	cluster_82	yes	no
CGN	CGN5	cluster_82	yes	no
CGN	CGN6	cluster_82	yes	no
CGN	CGN7	cluster_82	yes	no
CGN	CGN8	cluster_82	yes	no
DP	DP03	cluster_82	no	no
DP	DP05	cluster_82	yes	no
DP	DP07	cluster_82	no	no
DP	DP09	cluster_82	no	no
DP	DP10	cluster_82	no	no
DP	DP12	cluster_82	no	no
DP	DP13	cluster_82	no	no
DP	DP15	cluster_82	no	no
DP	DP16	cluster_82	no	no
DP	DP20	cluster_82	no	no
DP	DP21	cluster_82	no	no
DP	DP23	cluster_82	yes	no
DP	DP24	cluster_82	no	no
DP	DP25	cluster_82	no	no
DP	DP28	cluster_82	no	no
DP	DP29	cluster_82	no	no
DP	DP31	cluster_82	no	no
DP	DP32	cluster_82	no	no
DP	DP33	cluster_82	no	no
DP	DP34	cluster_82	no	no
KG	KG03	cluster_82	yes	no
KG	KG05	cluster_82	no	no
KG	KG07	cluster_82	no	no
KG	KG12	cluster_82	no	no
KG	KG14	cluster_82	yes	no
KG	KG15	cluster_82	no	no
KG	KG18	cluster_82	no	no
KG	KG19	cluster_82	no	no
KG	KG20	cluster_82	no	no
KG	KG22	cluster_82	no	no
KG	KG24	cluster_82	no	no
KG	KG26	cluster_82	no	no
KG	KG29	cluster_82	yes	no
KG	KG32	cluster_82	no	no
KG	KG33	cluster_82	no	no
KG	KG35	cluster_82	no	no
KG	KG41	cluster_82	no	no
KG	KG42	cluster_82	yes	no
KG	KG43	cluster_82	no	no
KG	KG44	cluster_82	no	no
SN	SN03	cluster_82	no	no
SN	SN04	cluster_82	no	no
SN	SN08	cluster_82	no	no
SN	SN09	cluster_82	no	no
SN	SN10	cluster_82	no	no
SN	SN11	cluster_82	no	no
SN	SN12	cluster_82	no	no
SN	SN13	cluster_82	no	no
SN	SN14	cluster_82	no	no
SN	SN15	cluster_82	no	no
SN	SN16	cluster_82	no	no
SN	SN17	cluster_82	no	no
SN	SN18	cluster_82	no	no
SN	SN19	cluster_82	no	no
SN	SN20	cluster_82	no	no
SN	SN21	cluster_82	no	no
SN	SN23	cluster_82	no	no
SN	SN24	cluster_82	no	no
SN	SN26	cluster_82	no	no
CHT	CHT01	cluster_82	no	no
CHT	CHT02	cluster_82	yes	no
CHT	CHT03	cluster_82	no	no
CHT	CHT04	cluster_82	no	no
CHT	CHT05	cluster_82	no	no
CHT	CHT06	cluster_82	no	no
CHT	CHT07	cluster_82	no	no
CHT	CHT08	cluster_82	no	no
CHT	CHT10	cluster_82	no	no
CHT	CHT11	cluster_82	no	no
CHT	CHT12	cluster_82	no	no
CHT	CHT14	cluster_82	no	no
CHT	CHT15	cluster_82	no	no
CHT	CHT16	cluster_82	no	no
CHT	CHT19	cluster_82	no	no
CHT	CHT23	cluster_82	no	no
CHT	CHT26	cluster_82	no	no
CHT	CHT28	cluster_82	no	no
TU	TU01	cluster_84	yes	yes
TU	TU02	cluster_84	yes	yes
TU	TU03	cluster_84	yes	yes
TU	TU06	cluster_84	yes	yes
TU	TU08	cluster_84	no	yes
TU	TU10	cluster_84	yes	yes
TU	TU12	cluster_84	yes	yes
TU	TU14	cluster_84	yes	yes
CGN	CGN1	cluster_84	yes	yes
CGN	CGN2	cluster_84	yes	yes
CGN	CGN3	cluster_84	yes	yes
CGN	CGN4	cluster_84	yes	yes
CGN	CGN5	cluster_84	yes	yes
CGN	CGN6	cluster_84	yes	yes
CGN	CGN7	cluster_84	yes	yes
CGN	CGN8	cluster_84	yes	yes
DP	DP03	cluster_84	no	yes
DP	DP05	cluster_84	no	yes
DP	DP07	cluster_84	no	yes
DP	DP09	cluster_84	no	yes
DP	DP10	cluster_84	no	yes
DP	DP12	cluster_84	no	yes
DP	DP13	cluster_84	yes	yes
DP	DP15	cluster_84	no	yes
DP	DP16	cluster_84	yes	yes
DP	DP20	cluster_84	yes	yes
DP	DP21	cluster_84	no	yes
DP	DP23	cluster_84	no	yes
DP	DP24	cluster_84	no	yes
DP	DP25	cluster_84	no	yes
DP	DP28	cluster_84	no	yes
DP	DP29	cluster_84	no	yes
DP	DP31	cluster_84	no	yes
DP	DP32	cluster_84	no	yes
DP	DP33	cluster_84	yes	yes
DP	DP34	cluster_84	no	yes
KG	KG03	cluster_84	no	yes
KG	KG05	cluster_84	yes	yes
KG	KG07	cluster_84	yes	yes
KG	KG12	cluster_84	yes	yes
KG	KG14	cluster_84	yes	yes
KG	KG15	cluster_84	yes	yes
KG	KG18	cluster_84	yes	yes
KG	KG19	cluster_84	no	yes
KG	KG20	cluster_84	yes	yes
KG	KG22	cluster_84	yes	yes
KG	KG24	cluster_84	yes	yes
KG	KG26	cluster_84	yes	yes
KG	KG29	cluster_84	yes	yes
KG	KG32	cluster_84	yes	yes
KG	KG33	cluster_84	yes	yes
KG	KG35	cluster_84	no	yes
KG	KG41	cluster_84	no	yes
KG	KG42	cluster_84	no	yes
KG	KG43	cluster_84	no	yes
KG	KG44	cluster_84	yes	yes
SN	SN03	cluster_84	yes	yes
SN	SN04	cluster_84	yes	yes
SN	SN08	cluster_84	yes	yes
SN	SN09	cluster_84	yes	yes
SN	SN10	cluster_84	no	yes
SN	SN11	cluster_84	yes	yes
SN	SN12	cluster_84	no	yes
SN	SN13	cluster_84	yes	yes
SN	SN14	cluster_84	yes	yes
SN	SN15	cluster_84	no	yes
SN	SN16	cluster_84	yes	yes
SN	SN17	cluster_84	yes	yes
SN	SN18	cluster_84	yes	yes
SN	SN19	cluster_84	no	yes
SN	SN20	cluster_84	no	yes
SN	SN21	cluster_84	no	yes
SN	SN23	cluster_84	no	yes
SN	SN24	cluster_84	yes	yes
SN	SN26	cluster_84	no	yes
CHT	CHT01	cluster_84	yes	yes
CHT	CHT02	cluster_84	yes	yes
CHT	CHT03	cluster_84	yes	yes
CHT	CHT04	cluster_84	yes	yes
CHT	CHT05	cluster_84	yes	yes
CHT	CHT06	cluster_84	yes	yes
CHT	CHT07	cluster_84	no	yes
CHT	CHT08	cluster_84	yes	yes
CHT	CHT10	cluster_84	yes	yes
CHT	CHT11	cluster_84	yes	yes
CHT	CHT12	cluster_84	no	yes
CHT	CHT14	cluster_84	yes	yes
CHT	CHT15	cluster_84	no	yes
CHT	CHT16	cluster_84	yes	yes
CHT	CHT19	cluster_84	no	yes
CHT	CHT23	cluster_84	no	yes
CHT	CHT26	cluster_84	yes	yes
CHT	CHT28	cluster_84	yes	yes
TU	TU01	cluster_88	yes	yes
TU	TU02	cluster_88	yes	yes
TU	TU03	cluster_88	yes	yes
TU	TU06	cluster_88	no	yes
TU	TU08	cluster_88	yes	yes
TU	TU10	cluster_88	no	yes
TU	TU12	cluster_88	yes	yes
TU	TU14	cluster_88	no	yes
CGN	CGN1	cluster_88	yes	yes
CGN	CGN2	cluster_88	yes	yes
CGN	CGN3	cluster_88	yes	yes
CGN	CGN4	cluster_88	no	yes
CGN	CGN5	cluster_88	yes	yes
CGN	CGN6	cluster_88	no	yes
CGN	CGN7	cluster_88	yes	yes
CGN	CGN8	cluster_88	yes	yes
DP	DP03	cluster_88	no	yes
DP	DP05	cluster_88	yes	yes
DP	DP07	cluster_88	yes	yes
DP	DP09	cluster_88	no	yes
DP	DP10	cluster_88	yes	yes
DP	DP12	cluster_88	no	yes
DP	DP13	cluster_88	yes	yes
DP	DP15	cluster_88	yes	yes
DP	DP16	cluster_88	no	yes
DP	DP20	cluster_88	yes	yes
DP	DP21	cluster_88	yes	yes
DP	DP23	cluster_88	yes	yes
DP	DP24	cluster_88	no	yes
DP	DP25	cluster_88	yes	yes
DP	DP28	cluster_88	yes	yes
DP	DP29	cluster_88	yes	yes
DP	DP31	cluster_88	no	yes
DP	DP32	cluster_88	yes	yes
DP	DP33	cluster_88	no	yes
DP	DP34	cluster_88	no	yes
KG	KG03	cluster_88	yes	yes
KG	KG05	cluster_88	yes	yes
KG	KG07	cluster_88	yes	yes
KG	KG12	cluster_88	yes	yes
KG	KG14	cluster_88	yes	yes
KG	KG15	cluster_88	yes	yes
KG	KG18	cluster_88	yes	yes
KG	KG19	cluster_88	no	yes
KG	KG20	cluster_88	yes	yes
KG	KG22	cluster_88	yes	yes
KG	KG24	cluster_88	yes	yes
KG	KG26	cluster_88	yes	yes
KG	KG29	cluster_88	yes	yes
KG	KG32	cluster_88	yes	yes
KG	KG33	cluster_88	yes	yes
KG	KG35	cluster_88	no	yes
KG	KG41	cluster_88	yes	yes
KG	KG42	cluster_88	yes	yes
KG	KG43	cluster_88	yes	yes
KG	KG44	cluster_88	yes	yes
SN	SN03	cluster_88	yes	yes
SN	SN04	cluster_88	yes	yes
SN	SN08	cluster_88	yes	yes
SN	SN09	cluster_88	yes	yes
SN	SN10	cluster_88	yes	yes
SN	SN11	cluster_88	yes	yes
SN	SN12	cluster_88	yes	yes
SN	SN13	cluster_88	yes	yes
SN	SN14	cluster_88	yes	yes
SN	SN15	cluster_88	yes	yes
SN	SN16	cluster_88	yes	yes
SN	SN17	cluster_88	yes	yes
SN	SN18	cluster_88	yes	yes
SN	SN19	cluster_88	yes	yes
SN	SN20	cluster_88	yes	yes
SN	SN21	cluster_88	yes	yes
SN	SN23	cluster_88	yes	yes
SN	SN24	cluster_88	yes	yes
SN	SN26	cluster_88	yes	yes
CHT	CHT01	cluster_88	yes	yes
CHT	CHT02	cluster_88	yes	yes
CHT	CHT03	cluster_88	yes	yes
CHT	CHT04	cluster_88	yes	yes
CHT	CHT05	cluster_88	yes	yes
CHT	CHT06	cluster_88	yes	yes
CHT	CHT07	cluster_88	yes	yes
CHT	CHT08	cluster_88	yes	yes
CHT	CHT10	cluster_88	yes	yes
CHT	CHT11	cluster_88	yes	yes
CHT	CHT12	cluster_88	yes	yes
CHT	CHT14	cluster_88	no	yes
CHT	CHT15	cluster_88	yes	yes
CHT	CHT16	cluster_88	yes	yes
CHT	CHT19	cluster_88	yes	yes
CHT	CHT23	cluster_88	yes	yes
CHT	CHT26	cluster_88	yes	yes
CHT	CHT28	cluster_88	yes	yes
TU	TU01	cluster_89	no	yes
TU	TU02	cluster_89	no	yes
TU	TU03	cluster_89	no	yes
TU	TU06	cluster_89	yes	yes
TU	TU08	cluster_89	no	yes
TU	TU10	cluster_89	yes	yes
TU	TU12	cluster_89	no	yes
TU	TU14	cluster_89	no	yes
CGN	CGN1	cluster_89	yes	yes
CGN	CGN2	cluster_89	yes	yes
CGN	CGN3	cluster_89	yes	yes
CGN	CGN4	cluster_89	yes	yes
CGN	CGN5	cluster_89	yes	yes
CGN	CGN6	cluster_89	yes	yes
CGN	CGN7	cluster_89	yes	yes
CGN	CGN8	cluster_89	yes	yes
DP	DP03	cluster_89	no	yes
DP	DP05	cluster_89	no	yes
DP	DP07	cluster_89	no	yes
DP	DP09	cluster_89	no	yes
DP	DP10	cluster_89	no	yes
DP	DP12	cluster_89	yes	yes
DP	DP13	cluster_89	no	yes
DP	DP15	cluster_89	no	yes
DP	DP16	cluster_89	yes	yes
DP	DP20	cluster_89	yes	yes
DP	DP21	cluster_89	no	yes
DP	DP23	cluster_89	no	yes
DP	DP24	cluster_89	no	yes
DP	DP25	cluster_89	no	yes
DP	DP28	cluster_89	no	yes
DP	DP29	cluster_89	no	yes
DP	DP31	cluster_89	no	yes
DP	DP32	cluster_89	no	yes
DP	DP33	cluster_89	no	yes
DP	DP34	cluster_89	no	yes
KG	KG03	cluster_89	yes	yes
KG	KG05	cluster_89	no	yes
KG	KG07	cluster_89	yes	yes
KG	KG12	cluster_89	no	yes
KG	KG14	cluster_89	no	yes
KG	KG15	cluster_89	no	yes
KG	KG18	cluster_89	no	yes
KG	KG19	cluster_89	no	yes
KG	KG20	cluster_89	yes	yes
KG	KG22	cluster_89	no	yes
KG	KG24	cluster_89	yes	yes
KG	KG26	cluster_89	yes	yes
KG	KG29	cluster_89	yes	yes
KG	KG32	cluster_89	no	yes
KG	KG33	cluster_89	no	yes
KG	KG35	cluster_89	yes	yes
KG	KG41	cluster_89	yes	yes
KG	KG42	cluster_89	yes	yes
KG	KG43	cluster_89	no	yes
KG	KG44	cluster_89	no	yes
SN	SN03	cluster_89	yes	yes
SN	SN04	cluster_89	no	yes
SN	SN08	cluster_89	no	yes
SN	SN09	cluster_89	no	yes
SN	SN10	cluster_89	no	yes
SN	SN11	cluster_89	no	yes
SN	SN12	cluster_89	yes	yes
SN	SN13	cluster_89	no	yes
SN	SN14	cluster_89	yes	yes
SN	SN15	cluster_89	yes	yes
SN	SN16	cluster_89	no	yes
SN	SN17	cluster_89	yes	yes
SN	SN18	cluster_89	no	yes
SN	SN19	cluster_89	yes	yes
SN	SN20	cluster_89	yes	yes
SN	SN21	cluster_89	no	yes
SN	SN23	cluster_89	yes	yes
SN	SN24	cluster_89	yes	yes
SN	SN26	cluster_89	no	yes
CHT	CHT01	cluster_89	yes	yes
CHT	CHT02	cluster_89	yes	yes
CHT	CHT03	cluster_89	yes	yes
CHT	CHT04	cluster_89	yes	yes
CHT	CHT05	cluster_89	yes	yes
CHT	CHT06	cluster_89	no	yes
CHT	CHT07	cluster_89	no	yes
CHT	CHT08	cluster_89	no	yes
CHT	CHT10	cluster_89	yes	yes
CHT	CHT11	cluster_89	yes	yes
CHT	CHT12	cluster_89	yes	yes
CHT	CHT14	cluster_89	no	yes
CHT	CHT15	cluster_89	no	yes
CHT	CHT16	cluster_89	yes	yes
CHT	CHT19	cluster_89	no	yes
CHT	CHT23	cluster_89	yes	yes
CHT	CHT26	cluster_89	no	yes
CHT	CHT28	cluster_89	yes	yes
TU	TU01	cluster_95	no	yes
TU	TU02	cluster_95	no	yes
TU	TU03	cluster_95	no	yes
TU	TU06	cluster_95	no	yes
TU	TU08	cluster_95	no	yes
TU	TU10	cluster_95	no	yes
TU	TU12	cluster_95	no	yes
TU	TU14	cluster_95	no	yes
CGN	CGN1	cluster_95	yes	yes
CGN	CGN2	cluster_95	yes	yes
CGN	CGN3	cluster_95	yes	yes
CGN	CGN4	cluster_95	yes	yes
CGN	CGN5	cluster_95	yes	yes
CGN	CGN6	cluster_95	yes	yes
CGN	CGN7	cluster_95	yes	yes
CGN	CGN8	cluster_95	yes	yes
DP	DP03	cluster_95	no	yes
DP	DP05	cluster_95	yes	yes
DP	DP07	cluster_95	no	yes
DP	DP09	cluster_95	no	yes
DP	DP10	cluster_95	no	yes
DP	DP12	cluster_95	no	yes
DP	DP13	cluster_95	yes	yes
DP	DP15	cluster_95	no	yes
DP	DP16	cluster_95	no	yes
DP	DP20	cluster_95	yes	yes
DP	DP21	cluster_95	no	yes
DP	DP23	cluster_95	no	yes
DP	DP24	cluster_95	no	yes
DP	DP25	cluster_95	no	yes
DP	DP28	cluster_95	yes	yes
DP	DP29	cluster_95	no	yes
DP	DP31	cluster_95	yes	yes
DP	DP32	cluster_95	no	yes
DP	DP33	cluster_95	yes	yes
DP	DP34	cluster_95	no	yes
KG	KG03	cluster_95	yes	yes
KG	KG05	cluster_95	yes	yes
KG	KG07	cluster_95	no	yes
KG	KG12	cluster_95	yes	yes
KG	KG14	cluster_95	yes	yes
KG	KG15	cluster_95	yes	yes
KG	KG18	cluster_95	no	yes
KG	KG19	cluster_95	no	yes
KG	KG20	cluster_95	no	yes
KG	KG22	cluster_95	yes	yes
KG	KG24	cluster_95	no	yes
KG	KG26	cluster_95	yes	yes
KG	KG29	cluster_95	yes	yes
KG	KG32	cluster_95	yes	yes
KG	KG33	cluster_95	yes	yes
KG	KG35	cluster_95	no	yes
KG	KG41	cluster_95	no	yes
KG	KG42	cluster_95	yes	yes
KG	KG43	cluster_95	yes	yes
KG	KG44	cluster_95	no	yes
SN	SN03	cluster_95	no	yes
SN	SN04	cluster_95	no	yes
SN	SN08	cluster_95	yes	yes
SN	SN09	cluster_95	yes	yes
SN	SN10	cluster_95	no	yes
SN	SN11	cluster_95	no	yes
SN	SN12	cluster_95	yes	yes
SN	SN13	cluster_95	yes	yes
SN	SN14	cluster_95	no	yes
SN	SN15	cluster_95	yes	yes
SN	SN16	cluster_95	yes	yes
SN	SN17	cluster_95	yes	yes
SN	SN18	cluster_95	no	yes
SN	SN19	cluster_95	yes	yes
SN	SN20	cluster_95	no	yes
SN	SN21	cluster_95	no	yes
SN	SN23	cluster_95	no	yes
SN	SN24	cluster_95	yes	yes
SN	SN26	cluster_95	yes	yes
CHT	CHT01	cluster_95	yes	yes
CHT	CHT02	cluster_95	yes	yes
CHT	CHT03	cluster_95	yes	yes
CHT	CHT04	cluster_95	yes	yes
CHT	CHT05	cluster_95	yes	yes
CHT	CHT06	cluster_95	no	yes
CHT	CHT07	cluster_95	no	yes
CHT	CHT08	cluster_95	yes	yes
CHT	CHT10	cluster_95	yes	yes
CHT	CHT11	cluster_95	yes	yes
CHT	CHT12	cluster_95	no	yes
CHT	CHT14	cluster_95	no	yes
CHT	CHT15	cluster_95	yes	yes
CHT	CHT16	cluster_95	yes	yes
CHT	CHT19	cluster_95	yes	yes
CHT	CHT23	cluster_95	yes	yes
CHT	CHT26	cluster_95	yes	yes
CHT	CHT28	cluster_95	yes	yes
TU	TU01	cluster_98	no	no
TU	TU02	cluster_98	no	no
TU	TU03	cluster_98	no	no
TU	TU06	cluster_98	no	no
TU	TU08	cluster_98	no	no
TU	TU10	cluster_98	no	no
TU	TU12	cluster_98	no	no
TU	TU14	cluster_98	no	no
CGN	CGN1	cluster_98	yes	no
CGN	CGN2	cluster_98	yes	no
CGN	CGN3	cluster_98	yes	no
CGN	CGN4	cluster_98	no	no
CGN	CGN5	cluster_98	yes	no
CGN	CGN6	cluster_98	no	no
CGN	CGN7	cluster_98	yes	no
CGN	CGN8	cluster_98	yes	no
DP	DP03	cluster_98	no	no
DP	DP05	cluster_98	yes	no
DP	DP07	cluster_98	no	no
DP	DP09	cluster_98	no	no
DP	DP10	cluster_98	no	no
DP	DP12	cluster_98	no	no
DP	DP13	cluster_98	yes	no
DP	DP15	cluster_98	no	no
DP	DP16	cluster_98	no	no
DP	DP20	cluster_98	no	no
DP	DP21	cluster_98	no	no
DP	DP23	cluster_98	no	no
DP	DP24	cluster_98	no	no
DP	DP25	cluster_98	no	no
DP	DP28	cluster_98	no	no
DP	DP29	cluster_98	no	no
DP	DP31	cluster_98	no	no
DP	DP32	cluster_98	no	no
DP	DP33	cluster_98	no	no
DP	DP34	cluster_98	no	no
KG	KG03	cluster_98	no	no
KG	KG05	cluster_98	yes	no
KG	KG07	cluster_98	no	no
KG	KG12	cluster_98	no	no
KG	KG14	cluster_98	no	no
KG	KG15	cluster_98	no	no
KG	KG18	cluster_98	no	no
KG	KG19	cluster_98	yes	no
KG	KG20	cluster_98	yes	no
KG	KG22	cluster_98	no	no
KG	KG24	cluster_98	yes	no
KG	KG26	cluster_98	yes	no
KG	KG29	cluster_98	no	no
KG	KG32	cluster_98	no	no
KG	KG33	cluster_98	no	no
KG	KG35	cluster_98	no	no
KG	KG41	cluster_98	no	no
KG	KG42	cluster_98	no	no
KG	KG43	cluster_98	yes	no
KG	KG44	cluster_98	no	no
SN	SN03	cluster_98	yes	no
SN	SN04	cluster_98	no	no
SN	SN08	cluster_98	no	no
SN	SN09	cluster_98	no	no
SN	SN10	cluster_98	no	no
SN	SN11	cluster_98	no	no
SN	SN12	cluster_98	no	no
SN	SN13	cluster_98	no	no
SN	SN14	cluster_98	no	no
SN	SN15	cluster_98	yes	no
SN	SN16	cluster_98	yes	no
SN	SN17	cluster_98	no	no
SN	SN18	cluster_98	yes	no
SN	SN19	cluster_98	no	no
SN	SN20	cluster_98	no	no
SN	SN21	cluster_98	no	no
SN	SN23	cluster_98	yes	no
SN	SN24	cluster_98	yes	no
SN	SN26	cluster_98	no	no
CHT	CHT01	cluster_98	no	no
CHT	CHT02	cluster_98	no	no
CHT	CHT03	cluster_98	no	no
CHT	CHT04	cluster_98	no	no
CHT	CHT05	cluster_98	no	no
CHT	CHT06	cluster_98	no	no
CHT	CHT07	cluster_98	no	no
CHT	CHT08	cluster_98	no	no
CHT	CHT10	cluster_98	no	no
CHT	CHT11	cluster_98	no	no
CHT	CHT12	cluster_98	no	no
CHT	CHT14	cluster_98	no	no
CHT	CHT15	cluster_98	no	no
CHT	CHT16	cluster_98	no	no
CHT	CHT19	cluster_98	no	no
CHT	CHT23	cluster_98	no	no
CHT	CHT26	cluster_98	no	no
CHT	CHT28	cluster_98	no	no
TU	TU01	cluster_403	no	no
TU	TU02	cluster_403	no	no
TU	TU03	cluster_403	no	no
TU	TU06	cluster_403	no	no
TU	TU08	cluster_403	no	no
TU	TU10	cluster_403	no	no
TU	TU12	cluster_403	no	no
TU	TU14	cluster_403	no	no
CGN	CGN1	cluster_403	no	no
CGN	CGN2	cluster_403	no	no
CGN	CGN3	cluster_403	no	no
CGN	CGN4	cluster_403	yes	no
CGN	CGN5	cluster_403	yes	no
CGN	CGN6	cluster_403	yes	no
CGN	CGN7	cluster_403	no	no
CGN	CGN8	cluster_403	no	no
DP	DP03	cluster_403	no	no
DP	DP05	cluster_403	no	no
DP	DP07	cluster_403	no	no
DP	DP09	cluster_403	no	no
DP	DP10	cluster_403	no	no
DP	DP12	cluster_403	no	no
DP	DP13	cluster_403	no	no
DP	DP15	cluster_403	no	no
DP	DP16	cluster_403	no	no
DP	DP20	cluster_403	yes	no
DP	DP21	cluster_403	yes	no
DP	DP23	cluster_403	no	no
DP	DP24	cluster_403	no	no
DP	DP25	cluster_403	no	no
DP	DP28	cluster_403	no	no
DP	DP29	cluster_403	no	no
DP	DP31	cluster_403	no	no
DP	DP32	cluster_403	no	no
DP	DP33	cluster_403	no	no
DP	DP34	cluster_403	no	no
KG	KG03	cluster_403	no	no
KG	KG05	cluster_403	no	no
KG	KG07	cluster_403	no	no
KG	KG12	cluster_403	no	no
KG	KG14	cluster_403	no	no
KG	KG15	cluster_403	no	no
KG	KG18	cluster_403	no	no
KG	KG19	cluster_403	no	no
KG	KG20	cluster_403	yes	no
KG	KG22	cluster_403	no	no
KG	KG24	cluster_403	no	no
KG	KG26	cluster_403	no	no
KG	KG29	cluster_403	no	no
KG	KG32	cluster_403	no	no
KG	KG33	cluster_403	yes	no
KG	KG35	cluster_403	no	no
KG	KG41	cluster_403	no	no
KG	KG42	cluster_403	no	no
KG	KG43	cluster_403	no	no
KG	KG44	cluster_403	no	no
SN	SN03	cluster_403	no	no
SN	SN04	cluster_403	no	no
SN	SN08	cluster_403	no	no
SN	SN09	cluster_403	no	no
SN	SN10	cluster_403	no	no
SN	SN11	cluster_403	no	no
SN	SN12	cluster_403	no	no
SN	SN13	cluster_403	no	no
SN	SN14	cluster_403	yes	no
SN	SN15	cluster_403	no	no
SN	SN16	cluster_403	no	no
SN	SN17	cluster_403	no	no
SN	SN18	cluster_403	no	no
SN	SN19	cluster_403	yes	no
SN	SN20	cluster_403	no	no
SN	SN21	cluster_403	no	no
SN	SN23	cluster_403	no	no
SN	SN24	cluster_403	no	no
SN	SN26	cluster_403	no	no
CHT	CHT01	cluster_403	no	no
CHT	CHT02	cluster_403	no	no
CHT	CHT03	cluster_403	no	no
CHT	CHT04	cluster_403	no	no
CHT	CHT05	cluster_403	no	no
CHT	CHT06	cluster_403	no	no
CHT	CHT07	cluster_403	no	no
CHT	CHT08	cluster_403	no	no
CHT	CHT10	cluster_403	no	no
CHT	CHT11	cluster_403	no	no
CHT	CHT12	cluster_403	yes	no
CHT	CHT14	cluster_403	no	no
CHT	CHT15	cluster_403	no	no
CHT	CHT16	cluster_403	yes	no
CHT	CHT19	cluster_403	no	no
CHT	CHT23	cluster_403	no	no
CHT	CHT26	cluster_403	yes	no
CHT	CHT28	cluster_403	yes	no
TU	TU01	cluster_405	no	no
TU	TU02	cluster_405	no	no
TU	TU03	cluster_405	no	no
TU	TU06	cluster_405	no	no
TU	TU08	cluster_405	no	no
TU	TU10	cluster_405	no	no
TU	TU12	cluster_405	no	no
TU	TU14	cluster_405	no	no
CGN	CGN1	cluster_405	no	no
CGN	CGN2	cluster_405	no	no
CGN	CGN3	cluster_405	no	no
CGN	CGN4	cluster_405	no	no
CGN	CGN5	cluster_405	yes	no
CGN	CGN6	cluster_405	yes	no
CGN	CGN7	cluster_405	no	no
CGN	CGN8	cluster_405	no	no
DP	DP03	cluster_405	no	no
DP	DP05	cluster_405	yes	no
DP	DP07	cluster_405	no	no
DP	DP09	cluster_405	no	no
DP	DP10	cluster_405	no	no
DP	DP12	cluster_405	no	no
DP	DP13	cluster_405	no	no
DP	DP15	cluster_405	no	no
DP	DP16	cluster_405	no	no
DP	DP20	cluster_405	no	no
DP	DP21	cluster_405	no	no
DP	DP23	cluster_405	no	no
DP	DP24	cluster_405	no	no
DP	DP25	cluster_405	no	no
DP	DP28	cluster_405	no	no
DP	DP29	cluster_405	no	no
DP	DP31	cluster_405	no	no
DP	DP32	cluster_405	no	no
DP	DP33	cluster_405	no	no
DP	DP34	cluster_405	no	no
KG	KG03	cluster_405	no	no
KG	KG05	cluster_405	no	no
KG	KG07	cluster_405	no	no
KG	KG12	cluster_405	no	no
KG	KG14	cluster_405	no	no
KG	KG15	cluster_405	no	no
KG	KG18	cluster_405	no	no
KG	KG19	cluster_405	no	no
KG	KG20	cluster_405	no	no
KG	KG22	cluster_405	no	no
KG	KG24	cluster_405	no	no
KG	KG26	cluster_405	no	no
KG	KG29	cluster_405	no	no
KG	KG32	cluster_405	no	no
KG	KG33	cluster_405	no	no
KG	KG35	cluster_405	no	no
KG	KG41	cluster_405	no	no
KG	KG42	cluster_405	no	no
KG	KG43	cluster_405	no	no
KG	KG44	cluster_405	no	no
SN	SN03	cluster_405	no	no
SN	SN04	cluster_405	no	no
SN	SN08	cluster_405	no	no
SN	SN09	cluster_405	no	no
SN	SN10	cluster_405	no	no
SN	SN11	cluster_405	no	no
SN	SN12	cluster_405	no	no
SN	SN13	cluster_405	no	no
SN	SN14	cluster_405	no	no
SN	SN15	cluster_405	no	no
SN	SN16	cluster_405	no	no
SN	SN17	cluster_405	no	no
SN	SN18	cluster_405	yes	no
SN	SN19	cluster_405	no	no
SN	SN20	cluster_405	no	no
SN	SN21	cluster_405	no	no
SN	SN23	cluster_405	yes	no
SN	SN24	cluster_405	no	no
SN	SN26	cluster_405	no	no
CHT	CHT01	cluster_405	no	no
CHT	CHT02	cluster_405	no	no
CHT	CHT03	cluster_405	no	no
CHT	CHT04	cluster_405	no	no
CHT	CHT05	cluster_405	no	no
CHT	CHT06	cluster_405	no	no
CHT	CHT07	cluster_405	no	no
CHT	CHT08	cluster_405	no	no
CHT	CHT10	cluster_405	no	no
CHT	CHT11	cluster_405	no	no
CHT	CHT12	cluster_405	no	no
CHT	CHT14	cluster_405	no	no
CHT	CHT15	cluster_405	no	no
CHT	CHT16	cluster_405	no	no
CHT	CHT19	cluster_405	no	no
CHT	CHT23	cluster_405	no	no
CHT	CHT26	cluster_405	no	no
CHT	CHT28	cluster_405	no	no
TU	TU01	cluster_416	no	yes
TU	TU02	cluster_416	no	yes
TU	TU03	cluster_416	no	yes
TU	TU06	cluster_416	no	yes
TU	TU08	cluster_416	no	yes
TU	TU10	cluster_416	no	yes
TU	TU12	cluster_416	no	yes
TU	TU14	cluster_416	no	yes
CGN	CGN1	cluster_416	yes	yes
CGN	CGN2	cluster_416	yes	yes
CGN	CGN3	cluster_416	yes	yes
CGN	CGN4	cluster_416	yes	yes
CGN	CGN5	cluster_416	yes	yes
CGN	CGN6	cluster_416	yes	yes
CGN	CGN7	cluster_416	yes	yes
CGN	CGN8	cluster_416	yes	yes
DP	DP03	cluster_416	no	yes
DP	DP05	cluster_416	no	yes
DP	DP07	cluster_416	yes	yes
DP	DP09	cluster_416	no	yes
DP	DP10	cluster_416	no	yes
DP	DP12	cluster_416	no	yes
DP	DP13	cluster_416	no	yes
DP	DP15	cluster_416	no	yes
DP	DP16	cluster_416	no	yes
DP	DP20	cluster_416	no	yes
DP	DP21	cluster_416	no	yes
DP	DP23	cluster_416	no	yes
DP	DP24	cluster_416	no	yes
DP	DP25	cluster_416	no	yes
DP	DP28	cluster_416	no	yes
DP	DP29	cluster_416	no	yes
DP	DP31	cluster_416	no	yes
DP	DP32	cluster_416	no	yes
DP	DP33	cluster_416	no	yes
DP	DP34	cluster_416	no	yes
KG	KG03	cluster_416	no	yes
KG	KG05	cluster_416	no	yes
KG	KG07	cluster_416	no	yes
KG	KG12	cluster_416	no	yes
KG	KG14	cluster_416	yes	yes
KG	KG15	cluster_416	no	yes
KG	KG18	cluster_416	yes	yes
KG	KG19	cluster_416	yes	yes
KG	KG20	cluster_416	no	yes
KG	KG22	cluster_416	no	yes
KG	KG24	cluster_416	yes	yes
KG	KG26	cluster_416	no	yes
KG	KG29	cluster_416	no	yes
KG	KG32	cluster_416	yes	yes
KG	KG33	cluster_416	no	yes
KG	KG35	cluster_416	no	yes
KG	KG41	cluster_416	no	yes
KG	KG42	cluster_416	no	yes
KG	KG43	cluster_416	no	yes
KG	KG44	cluster_416	no	yes
SN	SN03	cluster_416	no	yes
SN	SN04	cluster_416	no	yes
SN	SN08	cluster_416	yes	yes
SN	SN09	cluster_416	no	yes
SN	SN10	cluster_416	no	yes
SN	SN11	cluster_416	no	yes
SN	SN12	cluster_416	no	yes
SN	SN13	cluster_416	no	yes
SN	SN14	cluster_416	no	yes
SN	SN15	cluster_416	yes	yes
SN	SN16	cluster_416	yes	yes
SN	SN17	cluster_416	yes	yes
SN	SN18	cluster_416	no	yes
SN	SN19	cluster_416	no	yes
SN	SN20	cluster_416	yes	yes
SN	SN21	cluster_416	no	yes
SN	SN23	cluster_416	no	yes
SN	SN24	cluster_416	yes	yes
SN	SN26	cluster_416	no	yes
CHT	CHT01	cluster_416	no	yes
CHT	CHT02	cluster_416	no	yes
CHT	CHT03	cluster_416	no	yes
CHT	CHT04	cluster_416	no	yes
CHT	CHT05	cluster_416	no	yes
CHT	CHT06	cluster_416	no	yes
CHT	CHT07	cluster_416	no	yes
CHT	CHT08	cluster_416	no	yes
CHT	CHT10	cluster_416	no	yes
CHT	CHT11	cluster_416	no	yes
CHT	CHT12	cluster_416	no	yes
CHT	CHT14	cluster_416	no	yes
CHT	CHT15	cluster_416	no	yes
CHT	CHT16	cluster_416	no	yes
CHT	CHT19	cluster_416	no	yes
CHT	CHT23	cluster_416	no	yes
CHT	CHT26	cluster_416	no	yes
CHT	CHT28	cluster_416	no	yes
TU	TU01	cluster_417	no	no
TU	TU02	cluster_417	no	no
TU	TU03	cluster_417	no	no
TU	TU06	cluster_417	no	no
TU	TU08	cluster_417	no	no
TU	TU10	cluster_417	no	no
TU	TU12	cluster_417	no	no
TU	TU14	cluster_417	no	no
CGN	CGN1	cluster_417	no	no
CGN	CGN2	cluster_417	no	no
CGN	CGN3	cluster_417	no	no
CGN	CGN4	cluster_417	no	no
CGN	CGN5	cluster_417	no	no
CGN	CGN6	cluster_417	no	no
CGN	CGN7	cluster_417	no	no
CGN	CGN8	cluster_417	no	no
DP	DP03	cluster_417	no	no
DP	DP05	cluster_417	no	no
DP	DP07	cluster_417	no	no
DP	DP09	cluster_417	no	no
DP	DP10	cluster_417	no	no
DP	DP12	cluster_417	no	no
DP	DP13	cluster_417	no	no
DP	DP15	cluster_417	no	no
DP	DP16	cluster_417	no	no
DP	DP20	cluster_417	no	no
DP	DP21	cluster_417	no	no
DP	DP23	cluster_417	no	no
DP	DP24	cluster_417	no	no
DP	DP25	cluster_417	no	no
DP	DP28	cluster_417	no	no
DP	DP29	cluster_417	no	no
DP	DP31	cluster_417	no	no
DP	DP32	cluster_417	no	no
DP	DP33	cluster_417	no	no
DP	DP34	cluster_417	no	no
KG	KG03	cluster_417	no	no
KG	KG05	cluster_417	no	no
KG	KG07	cluster_417	no	no
KG	KG12	cluster_417	no	no
KG	KG14	cluster_417	no	no
KG	KG15	cluster_417	no	no
KG	KG18	cluster_417	no	no
KG	KG19	cluster_417	no	no
KG	KG20	cluster_417	no	no
KG	KG22	cluster_417	no	no
[truncated: 63,536 more rows]

## Sheet: fig3S1_FISNACHT_venndata
Cluster	Walker_A	NACHT_Group	CGN1	CGN2	CGN3	CGN4	CGN5	CGN6	CGN7	CGN8	CHT01	CHT02	CHT03	CHT04	CHT05	CHT06	CHT07	CHT08	CHT10	CHT11	CHT12	CHT14	CHT15	CHT16	CHT19	CHT23	CHT26	CHT28	DP03	DP05	DP07	DP09	DP10	DP12	DP13	DP15	DP16	DP20	DP21	DP23	DP24	DP25	DP28	DP29	DP31	DP32	DP33	DP34	KG03
cluster_266	GIAGIGKT	3	0	1	1	0	1	0	0	0	0	0	0	0	0	0	0	0	0	0	0	0	0	0	0	0	0	2	0	0	0	0	0	0	0	0	1	0	2	0	0	0	1	0	0	0	0	0	0
cluster_311	GIAGIGKT	3	5	4	2	10	12	5	5	6	0	0	0	0	0	0	0	0	0	0	0	0	0	0	0	0	0	0	0	0	0	0	0	0	0	0	0	0	0	0	0	0	0	0	0	0	0	0	0
cluster_315	GIAGIGKT	3	4	6	0	0	0	0	0	2	0	0	0	0	0	0	0	0	0	0	0	0	0	0	0	0	0	0	0	0	0	0	0	0	0	0	0	0	1	0	0	0	0	0	0	0	0	0	0
cluster_360	GIAGVGKT	1	0	0	18	0	0	0	0	0	27	1	0	25	0	23	0	0	17	0	0	0	0	0	0	17	16	20	0	0	0	0	0	1	0	0	0	4	0	0	0	0	0	0	0	0	0	0	1
cluster_375	GIAGVGKT	1	0	0	8	0	0	0	0	0	0	4	0	0	0	0	0	13	0	0	0	0	0	0	0	0	3	2	0	0	2	0	0	3	0	2	0	0	0	4	0	0	0	0	0	0	0	0	4
cluster_406	GVAGIGKS	2	0	0	4	0	0	0	5	0	0	0	0	0	0	0	0	0	0	0	0	0	0	0	1	2	0	0	0	0	0	0	0	0	0	0	0	33	0	0	0	0	0	0	0	1	0	0	0
cluster_414	GVAGIGKS	2	0	0	18	0	0	0	0	0	0	0	25	0	20	0	0	14	0	0	0	0	0	0	0	0	15	16	0	0	0	2	0	0	0	0	0	0	0	0	0	0	0	0	0	0	0	0	4
cluster_416	GVAGIGKS	2	0	0	12	0	0	0	25	0	0	0	0	1	2	0	0	0	0	0	1	0	0	0	0	0	0	0	0	0	0	0	0	0	0	0	0	0	0	0	0	0	0	0	0	0	0	0	0
cluster_427	GVAGIGKS	2	0	0	14	0	0	0	0	0	0	0	0	1	0	2	0	0	0	0	0	0	0	0	0	0	0	0	0	0	0	0	0	0	0	0	0	0	0	0	0	0	0	0	0	0	0	0	0
cluster_443	GVAGIGKS	2	0	0	11	0	0	0	0	0	0	0	0	0	0	0	0	0	0	0	0	0	0	0	0	0	0	0	0	0	0	0	0	0	0	0	0	0	0	0	0	0	0	0	0	0	0	0	0
cluster_446	GVAGIGKS	2	0	0	21	0	0	0	0	0	0	0	0	0	0	0	0	0	0	0	0	0	0	0	0	0	0	0	0	0	0	1	1	1	0	0	0	0	0	0	2	0	0	0	0	0	0	0	1
cluster_490	GIAGIGKT	3	0	6	12	0	0	0	0	0	0	1	1	0	0	0	0	0	0	0	0	0	0	0	0	2	0	1	0	0	0	0	0	0	0	0	0	0	1	0	0	0	0	0	0	0	0	0	0
cluster_516	GIAGIGKT	3	0	0	15	0	0	0	0	0	0	0	0	0	0	0	0	0	0	0	0	0	0	0	0	0	0	0	0	1	2	0	1	0	0	0	0	0	0	0	0	0	0	0	0	0	0	0	1
cluster_577	GIAGVGKT	1	3	6	0	3	6	5	3	2	0	0	0	0	0	0	1	5	0	6	0	0	3	2	0	2	6	3	0	0	0	0	1	1	1	0	0	2	1	0	0	1	1	1	1	0	0	0	3
cluster_592	GVAGIGKS	2	0	4	8	14	0	0	0	0	0	0	0	0	0	0	2	0	4	0	0	0	0	1	0	0	0	0	0	0	0	0	0	0	0	0	0	0	0	0	0	0	0	0	0	0	0	0	0
cluster_613	GVAGIGKS	2	0	0	1	1	0	0	0	0	0	0	0	0	0	0	0	0	0	0	0	0	0	0	0	0	0	0	0	0	0	0	0	0	0	0	0	0	0	0	0	0	0	0	0	0	0	0	0
cluster_650	GIAGIGKT	3	8	0	0	13	0	0	0	31	0	0	0	0	0	1	0	0	0	0	0	0	0	0	0	0	0	0	1	1	0	1	0	2	0	0	0	10	0	1	0	1	0	0	0	0	0	0	0
cluster_671	GIAGIGKT	3	2	14	8	30	5	3	14	7	1	1	0	0	0	0	1	0	1	2	0	0	0	0	1	1	0	0	0	0	9	0	0	0	0	1	0	7	0	2	0	1	0	0	0	0	1	0	0
cluster_677	GIAGIGKT	3	1	0	0	2	1	0	0	0	0	0	0	0	0	0	0	0	0	0	0	0	0	0	0	0	0	0	0	0	0	0	0	0	0	0	0	0	0	0	0	0	0	0	0	0	0	0	0
cluster_749	GVAGIGKT	4	0	0	0	1	0	0	0	0	0	0	0	0	0	0	0	0	0	0	0	0	0	0	0	0	0	0	0	0	0	0	0	0	0	0	0	0	0	0	0	0	0	0	0	0	0	0	0
cluster_892	GIAGIGKT	3	19	17	7	17	27	24	19	13	32	35	42	26	14	18	13	42	23	31	26	0	7	29	7	16	1	3	0	0	4	3	0	0	1	2	2	0	0	0	0	0	1	0	0	0	1	0	9
cluster_936	GIAGIGKT	3	13	4	1	2	8	15	8	1	0	0	0	1	0	0	0	0	0	0	0	0	0	0	0	0	0	0	0	0	0	0	0	0	0	0	0	0	0	0	0	0	0	0	0	0	0	0	0
cluster_946	GIAGIGKT	3	25	11	9	0	27	7	11	18	9	13	16	16	22	17	0	11	12	22	12	1	6	14	0	11	7	10	0	1	4	1	0	0	0	0	0	20	0	0	0	1	9	0	0	0	2	1	0
cluster_961	GVAGIGKT	4	6	6	5	7	13	15	8	8	0	0	0	0	0	0	0	0	0	0	0	0	0	0	0	0	0	0	0	0	0	0	0	0	0	0	0	0	0	0	0	0	0	0	0	0	0	0	0
cluster_976	GIAGVGKT	1	16	8	10	3	14	21	13	22	11	5	4	11	5	14	3	7	5	3	6	0	6	4	0	0	5	10	0	7	8	2	4	1	6	0	7	97	0	8	3	2	5	3	0	8	1	1	5
cluster_986	GIAGVGKT	1	2	5	4	2	4	20	7	10	0	0	0	0	0	0	0	0	0	0	0	0	0	0	0	0	0	0	0	0	0	0	0	0	0	0	1	0	0	0	0	0	0	1	0	0	0	0	0
cluster_2005	GIAGVGKT	1	0	0	0	0	0	0	0	0	0	41	0	0	0	0	0	0	0	0	0	0	0	0	0	0	0	0	0	0	0	0	0	0	0	0	0	0	0	0	0	0	0	0	0	0	0	0	1
cluster_2041	GVAGIGKS	2	0	0	0	0	0	0	0	0	0	12	0	0	0	0	0	0	0	0	0	0	0	0	0	0	0	0	0	0	0	0	4	0	0	0	0	0	0	0	0	0	0	0	0	0	0	0	0
cluster_2045	GVAGIGKS	2	0	0	0	0	0	0	0	0	3	19	11	7	0	0	0	0	0	0	0	0	3	0	0	1	0	0	0	0	1	0	0	0	0	0	0	0	0	0	0	0	0	0	0	0	0	0	1
cluster_2050	GVAGIGKS	2	0	0	0	0	0	0	0	0	0	5	0	0	0	0	0	0	0	0	0	0	0	0	0	0	0	0	0	0	0	0	0	0	0	0	0	0	0	0	0	0	0	0	0	0	0	0	0
cluster_2070	GVAGIGKS	2	3	0	0	3	2	1	2	3	0	15	9	0	0	10	0	8	2	10	2	0	3	8	0	0	0	0	0	0	0	0	0	0	0	0	0	7	0	1	0	1	3	0	0	0	0	0	2
cluster_2215	GIAGIGKT	3	0	0	0	0	0	0	0	0	13	42	0	15	15	19	0	0	6	0	15	1	0	0	0	0	0	0	0	0	0	0	0	0	0	0	0	0	0	0	0	0	0	0	0	0	0	0	0
cluster_2223	GIAGIGKT	3	0	0	0	0	0	0	0	0	0	19	0	3	0	25	40	17	0	0	15	0	0	11	0	1	1	1	0	0	0	0	0	0	0	0	0	0	0	0	0	0	0	0	0	0	0	0	0
cluster_2260	GIAGIGKT	3	0	0	0	0	0	0	0	3	3	9	0	4	5	1	3	5	3	4	0	0	3	6	2	2	2	6	0	0	0	0	0	0	0	0	0	0	0	0	0	0	0	0	0	0	0	0	1
cluster_2272	GIAGIGKT	3	13	5	8	9	12	9	12	11	12	48	2	0	0	4	3	0	0	0	0	0	0	7	3	8	0	0	0	0	0	0	1	2	0	0	0	0	0	1	0	0	0	0	0	0	0	0	3
cluster_2284	GIAGIGKT	3	0	0	0	0	0	0	0	0	4	12	0	0	0	0	0	0	0	0	0	0	0	0	0	0	0	0	0	0	0	0	0	0	0	0	0	0	0	0	0	0	0	0	0	0	0	0	0
cluster_2315	GVAGIGKT	4	7	4	1	4	7	8	2	5	39	100	53	53	29	36	38	39	45	35	33	5	15	61	15	17	25	35	0	3	1	6	1	2	0	4	3	23	2	2	1	2	4	1	1	2	0	1	26
cluster_2339	GVAGIGKT	4	0	0	0	0	0	0	0	0	0	22	0	0	0	0	0	0	0	0	0	0	0	0	0	0	0	0	0	0	0	0	0	0	0	0	0	0	0	0	0	0	0	0	0	0	0	0	0
cluster_2354	GIAGVGKT	1	0	0	0	0	0	1	1	0	1	6	96	1	12	0	0	6	1	8	1	0	1	3	0	5	3	4	0	1	0	0	0	0	0	0	0	0	0	0	0	0	1	0	0	0	0	0	3
cluster_2356	GIAGVGKT	1	3	1	7	3	15	12	14	12	30	47	39	17	16	30	27	30	22	27	14	1	5	13	16	30	14	10	2	4	3	2	8	7	5	2	3	101	0	6	8	7	7	5	4	10	0	1	5
cluster_2391	GIAGVGKT	1	0	0	0	0	0	0	0	0	0	1	66	65	0	44	42	1	0	0	66	5	0	0	0	0	0	0	0	0	1	0	0	6	0	0	0	0	7	0	0	0	12	0	0	0	0	0	0
cluster_2411	GVAGIGKS	2	0	0	0	0	0	0	0	0	0	1	35	0	1	0	0	0	5	0	0	0	0	0	0	0	0	0	0	0	0	0	2	0	0	0	0	0	0	0	0	0	0	0	0	5	0	0	0
cluster_2417	GVAGIGKS	2	0	0	0	0	0	0	0	0	0	27	34	6	6	6	1	2	0	0	0	0	0	27	0	13	0	0	0	0	0	0	0	0	0	0	0	0	0	0	0	0	0	0	0	0	0	0	3
cluster_2445	GVAGIGKS	2	0	0	0	0	0	0	0	0	0	0	14	0	0	0	0	0	0	0	0	0	12	0	0	0	0	0	0	0	0	0	0	0	0	0	0	0	0	0	0	1	0	0	0	0	0	0	0
cluster_2504	GVAGIGKS	2	0	0	0	0	0	0	0	0	0	20	28	0	29	0	17	0	0	23	0	0	0	0	0	0	0	0	0	0	0	0	0	0	0	0	0	0	0	0	0	1	0	0	0	0	0	0	4
cluster_2551	GIAGIGKT	3	0	0	0	0	3	0	1	0	1	6	35	2	1	0	0	1	0	0	1	0	1	2	0	0	3	2	0	0	0	0	0	0	0	0	0	3	0	0	0	0	0	0	0	0	0	0	14
cluster_2566	GIAGIGKT	3	0	0	0	0	0	0	0	0	0	0	26	0	21	0	0	0	14	0	0	0	0	16	0	13	0	0	0	3	0	0	0	0	0	0	0	0	0	0	0	0	0	0	0	0	0	0	0
cluster_2584	GIAGIGKT	3	0	0	0	0	0	0	0	0	1	19	50	0	24	0	21	16	27	0	17	1	0	0	11	12	0	0	0	0	0	0	0	0	0	0	1	0	0	0	0	0	0	0	0	0	0	0	0
cluster_2627	GIAGIGKT	3	0	0	0	0	0	0	0	0	12	13	24	4	22	10	17	4	0	4	17	1	15	7	4	4	2	2	0	0	3	1	0	1	0	0	0	2	0	0	0	0	0	0	0	1	1	0	0
cluster_2628	GIAGIGKT	3	6	2	0	0	0	0	0	4	0	4	46	31	0	19	0	6	0	3	0	0	18	2	0	0	0	0	0	1	0	3	0	0	0	0	2	0	0	1	0	0	0	0	2	0	2	0	4
cluster_2631	GIAGIGKT	3	0	2	1	2	0	0	0	0	11	6	83	0	3	0	0	0	5	2	4	1	0	5	6	0	11	16	0	0	0	0	0	0	0	0	0	0	4	0	1	0	0	0	0	1	0	0	1
cluster_2632	GIAGIGKT	3	0	0	0	0	0	0	0	0	2	8	27	0	3	0	10	14	3	1	1	0	0	13	0	0	0	0	0	0	0	0	0	0	0	0	0	0	0	0	0	0	0	0	0	0	0	0	0
cluster_2636	GIAGIGKT	3	0	0	0	0	0	0	0	0	0	0	13	0	0	0	2	0	0	0	0	0	0	0	4	0	0	0	0	0	0	0	0	0	0	0	2	0	0	0	0	0	0	0	0	0	0	0	7
cluster_2648	GIAGIGKT	3	0	0	0	0	0	0	0	0	0	0	39	0	0	0	0	0	0	0	0	0	0	0	0	0	0	0	0	0	0	0	0	0	0	0	0	0	0	0	0	0	0	0	0	0	0	0	0
cluster_2655	GIAGIGKT	3	0	0	0	0	0	0	0	0	0	0	12	0	0	0	0	0	0	0	0	0	0	0	0	0	18	12	0	0	0	0	0	0	0	0	0	0	0	0	0	0	1	0	0	0	0	0	0
cluster_3128	GVAGIGKS	2	0	0	0	0	0	0	0	0	0	7	0	0	20	0	0	0	0	10	0	0	0	8	0	0	0	0	0	0	0	0	0	0	0	0	0	0	0	0	0	0	0	0	0	0	0	0	0
cluster_3331	GVAGIGKT	4	0	0	0	0	0	0	0	0	12	19	1	8	12	4	0	0	8	0	8	0	4	0	0	7	14	10	0	0	0	0	0	0	0	0	0	0	0	0	0	0	0	0	0	0	0	0	0
cluster_3401	GIAGVGKT	1	0	0	0	0	0	0	0	0	0	0	0	0	0	21	0	0	0	0	0	0	0	0	0	0	13	14	0	0	0	0	0	0	0	0	0	0	0	0	0	0	0	0	0	0	0	0	0
cluster_3438	GVAGIGKS	2	0	0	0	0	0	0	0	0	0	0	0	10	0	12	0	0	0	0	0	0	0	0	0	0	1	0	0	0	0	0	0	0	0	0	0	0	0	0	0	0	0	0	0	0	0	0	0
cluster_3488	GVAGIGKS	2	0	0	0	0	0	0	0	0	0	0	0	0	0	32	0	0	0	19	0	1	0	0	0	0	0	0	0	0	0	0	0	0	0	0	0	0	0	0	0	0	0	0	0	0	0	0	0
cluster_3531	GIAGIGKT	3	0	0	0	0	0	0	0	0	0	0	0	0	0	1	0	0	0	0	0	0	0	0	0	0	0	0	0	0	0	0	0	0	0	0	0	0	0	0	0	0	0	0	0	0	0	0	0
cluster_3548	GIAGIGKT	3	1	0	0	0	0	0	0	1	5	12	33	23	19	26	30	24	8	19	0	1	8	16	4	5	4	10	0	0	0	0	0	0	0	0	0	0	0	0	0	0	0	0	0	0	0	0	0
cluster_3566	GIAGIGKT	3	0	0	0	0	0	0	0	0	0	0	0	0	0	19	17	7	0	0	9	0	0	5	0	0	0	0	0	0	0	0	0	0	0	0	0	0	0	0	0	0	0	0	0	0	0	0	0
cluster_3602	GIAGIGKT	3	0	0	0	0	0	0	0	0	0	0	0	0	0	22	0	0	0	0	0	0	0	0	0	0	0	0	0	0	0	0	0	0	0	0	0	0	0	0	0	0	0	0	0	0	0	0	0
cluster_3605	GIAGIGKT	3	0	0	0	0	0	0	0	0	0	5	0	10	0	6	0	6	3	5	0	0	0	0	0	0	4	5	0	0	1	0	1	0	0	0	1	0	0	0	1	0	1	0	1	0	0	1	0
cluster_3690	GVAGIGKT	4	2	0	0	1	4	0	1	3	70	27	0	40	13	58	14	1	21	60	12	0	0	26	14	6	0	0	0	0	0	0	0	0	0	3	0	0	0	0	0	0	0	0	0	0	0	2	0
cluster_3704	GIAGVGKT	1	0	0	0	0	0	0	0	0	0	2	1	24	3	17	24	5	0	6	19	0	2	4	0	3	0	3	0	0	0	3	0	0	0	0	2	0	0	0	0	0	0	0	1	0	0	0	0
cluster_3746	GVAGIGKS	2	0	0	0	0	0	0	0	0	0	0	10	0	0	0	28	0	6	0	0	0	0	21	0	2	0	0	0	0	0	0	0	0	0	0	0	0	0	0	0	0	0	0	0	0	0	0	0
cluster_3750	GVAGIGKS	2	0	0	0	0	0	0	0	0	0	0	0	0	1	0	15	0	0	0	0	1	0	0	0	0	0	0	0	0	0	0	0	0	0	0	0	0	0	0	0	0	0	0	0	0	0	0	0
cluster_3757	GVAGIGKS	2	0	0	0	0	0	0	0	0	0	1	0	52	9	22	44	1	5	5	3	0	2	0	5	0	4	5	0	0	0	0	0	0	0	0	0	0	0	0	0	0	0	0	0	0	0	0	0
cluster_3810	GIAGIGKT	3	0	0	0	0	0	0	0	0	1	2	7	1	0	13	11	4	2	0	5	2	2	4	0	2	2	2	0	0	0	3	0	0	0	0	0	0	0	2	0	0	0	0	0	0	0	0	0
cluster_3844	GIAGIGKT	3	0	0	0	0	0	0	0	0	0	0	0	0	0	0	15	2	10	0	0	0	0	0	0	0	0	0	0	0	0	0	0	0	0	0	0	0	0	0	0	0	0	0	0	0	0	0	0
cluster_3860	GIAGIGKT	3	0	0	0	0	0	0	0	0	0	7	0	18	0	41	32	7	0	0	13	0	0	10	0	0	4	4	0	0	0	0	0	0	0	0	0	6	0	0	0	0	0	0	0	0	0	0	2
cluster_3865	GIAGIGKT	3	0	0	2	0	0	0	0	0	3	0	0	5	0	8	29	1	0	4	0	0	0	1	0	1	18	13	0	0	0	0	0	0	0	0	0	0	0	0	0	0	1	0	0	0	0	0	0
cluster_3969	GVAGIGKS	2	0	0	0	0	0	0	0	0	0	0	0	2	0	4	4	2	0	0	0	0	0	1	0	0	0	0	0	0	0	0	0	0	0	0	0	0	0	0	0	0	0	0	0	0	0	0	0
cluster_4001	GVAGIGKS	2	0	0	0	0	0	0	0	0	0	1	0	0	36	0	0	31	0	0	0	0	0	0	0	0	0	0	0	0	0	0	0	0	3	0	0	0	0	0	0	2	0	0	0	0	0	0	1
cluster_4015	GVAGIGKS	2	0	0	0	0	0	0	0	0	0	0	0	0	0	2	0	27	0	2	1	0	2	12	0	0	0	1	0	0	0	0	0	0	0	0	0	0	1	0	0	0	0	0	0	0	0	0	0
cluster_4060	GIAGIGKT	3	0	0	0	0	0	0	0	0	0	0	0	0	0	0	0	12	0	0	0	0	0	4	0	0	0	0	0	0	0	0	0	0	0	0	0	0	0	0	0	0	0	0	0	0	0	0	0
cluster_4075	GIAGIGKT	3	0	0	0	0	0	0	0	0	0	0	0	0	0	0	0	23	0	0	0	0	0	9	0	0	17	22	0	0	0	0	0	0	0	0	0	0	0	0	0	0	0	0	0	0	0	0	0
cluster_4132	GIAGVGKT	1	0	0	0	0	0	0	0	0	0	0	0	0	1	1	0	2	22	0	0	0	1	0	0	0	0	0	0	0	0	0	0	0	0	0	0	0	0	0	0	0	0	0	0	0	0	0	0
cluster_4173	GVAGIGKS	2	0	0	0	0	0	0	0	0	0	0	0	0	0	0	0	0	1	0	0	0	0	0	0	0	0	0	0	0	0	0	0	0	0	0	0	0	0	0	0	0	0	0	0	0	0	0	0
cluster_4185	GVAGIGKS	2	0	0	3	0	0	0	0	0	1	0	0	0	0	1	9	0	24	0	1	2	4	0	0	0	0	0	0	0	0	0	0	0	0	0	0	0	0	0	0	0	0	0	0	0	0	0	7
cluster_4197	GVAGIGKS	2	0	0	0	0	0	0	0	0	23	0	0	0	0	1	0	0	36	3	0	0	0	5	0	0	0	0	0	0	0	0	0	0	0	0	0	0	0	3	0	0	0	0	0	0	0	0	0
cluster_4240	GIAGIGKT	3	0	0	0	0	0	0	0	0	0	3	0	1	27	0	0	0	27	5	3	0	3	12	0	16	0	0	0	0	0	0	0	0	0	0	0	0	0	0	0	0	0	0	0	0	0	0	0
cluster_4344	GVAGIGKT	4	0	0	0	0	0	0	0	0	0	0	0	0	3	0	0	0	20	0	0	0	0	0	0	0	0	0	0	0	0	0	0	0	0	0	0	0	0	0	0	0	0	0	0	0	0	0	0
cluster_4397	GIAGVGKT	1	0	0	0	0	0	0	0	0	0	7	0	3	0	0	0	0	0	38	0	0	1	8	0	0	0	0	0	0	0	0	0	0	0	0	0	0	0	0	0	0	0	0	0	0	0	0	0
cluster_4399	GIAGVGKT	1	0	0	0	0	0	0	0	0	0	0	23	0	0	0	0	0	12	22	0	0	0	0	0	0	0	0	0	0	0	0	0	3	0	0	0	0	0	0	0	0	1	0	0	0	0	0	0
cluster_4408	GVAGIGKS	2	0	0	0	0	0	0	0	0	0	0	1	0	35	0	0	0	0	28	0	0	0	0	0	0	0	0	0	0	0	0	0	0	0	0	0	0	1	0	0	0	0	0	0	4	0	0	0
cluster_4457	GVAGIGKS	2	3	3	2	6	6	9	14	14	7	11	10	7	0	0	11	0	15	13	7	2	6	0	5	18	0	1	0	0	6	0	0	5	0	1	0	0	0	2	1	0	0	2	0	0	0	0	0
cluster_4460	GVAGIGKS	2	0	0	0	0	0	0	0	0	0	0	0	0	0	0	0	0	0	19	0	0	0	1	0	0	0	0	0	0	0	0	0	0	0	0	0	0	0	0	0	0	0	0	0	0	0	0	0
cluster_4626	GIAGVGKT	1	0	0	0	0	0	0	0	0	0	1	11	0	1	0	0	0	0	0	54	0	0	0	0	3	0	0	0	1	0	2	2	0	0	4	0	0	0	0	0	0	0	0	0	0	0	0	0
cluster_4642	GIAGVGKT	1	0	0	0	0	1	0	0	0	5	8	8	9	7	7	2	10	2	12	8	0	2	20	1	0	9	9	0	0	2	0	1	0	0	0	0	1	0	0	0	0	0	0	0	1	0	0	0
cluster_4658	GVAGIGKS	2	0	0	0	0	0	0	0	0	0	4	5	0	3	1	1	1	0	0	1	1	0	0	0	0	0	0	0	0	0	0	0	1	0	0	0	4	0	0	0	0	0	0	0	0	0	0	0
cluster_4835	GIAGIGKT	3	0	0	0	0	1	3	0	4	31	28	0	48	35	2	1	32	18	24	0	3	18	17	0	3	30	8	0	0	0	0	0	0	0	0	0	0	0	0	0	0	0	0	0	0	0	0	3
cluster_4864	GIAGVGKT	1	2	1	0	1	1	0	1	1	0	12	0	17	0	8	0	0	0	7	12	0	21	4	0	5	0	0	0	0	1	0	0	0	0	0	0	3	0	0	0	0	0	0	0	1	0	1	5
cluster_4932	GVAGIGKS	2	0	0	0	0	0	0	0	0	20	10	25	0	0	0	15	12	0	17	0	0	12	10	4	11	0	0	0	0	0	0	0	0	1	0	0	0	0	0	2	0	5	3	0	0	2	0	2
cluster_4986	GIAGIGKT	3	2	3	2	0	10	0	4	5	0	5	14	0	6	0	0	0	0	0	0	0	9	6	2	0	0	0	0	0	0	0	0	0	0	0	0	0	0	0	0	0	0	0	0	0	0	0	0
cluster_5111	GVAGIGKS	2	0	0	0	0	0	0	0	0	0	0	0	0	10	0	0	33	0	0	0	0	1	3	1	1	0	0	0	0	0	0	0	0	0	0	0	0	0	0	0	0	0	0	0	0	0	0	0
cluster_5241	GIAGIGKT	3	0	0	0	0	0	0	0	0	0	16	30	0	37	0	0	0	0	0	0	0	16	9	2	0	0	0	0	0	0	0	0	0	0	0	0	0	0	0	0	0	0	0	0	0	0	0	0
cluster_5258	GIAGIGKT	3	0	0	0	0	0	0	0	0	0	0	0	0	0	0	7	0	0	0	0	0	0	17	0	0	0	0	0	0	0	0	0	0	0	0	0	0	0	0	0	0	0	0	0	0	0	0	0
cluster_5265	GIAGIGKT	3	0	0	0	0	0	0	0	0	3	1	4	2	1	0	0	1	6	3	2	0	4	9	0	0	0	0	0	0	0	0	0	0	0	0	0	0	0	0	0	0	0	0	0	0	0	0	2
cluster_5294	GIAGIGKT	3	0	0	0	0	0	0	0	0	0	0	0	0	0	0	5	0	0	0	0	0	0	2	0	0	0	0	0	0	0	0	0	0	0	0	0	0	0	0	0	0	0	0	0	0	0	0	0
cluster_5317	GIAGIGKT	3	0	0	0	0	0	0	0	0	0	0	2	0	0	0	0	0	0	0	0	0	0	7	0	0	0	0	0	0	0	0	0	0	0	0	0	0	0	0	0	0	0	0	0	0	0	0	0
cluster_5369	GVAGIGKT	4	0	0	0	0	0	0	0	0	0	16	0	0	0	0	0	0	0	0	0	0	0	15	0	0	0	0	0	0	0	0	0	0	0	0	2	0	1	2	0	0	0	0	0	0	0	0	0
cluster_5391	multiple	multiple	13	12	0	12	18	13	15	19	22	0	39	7	21	17	31	0	12	0	0	1	22	1	12	2	36	32	0	0	0	0	0	0	0	0	0	0	0	0	0	3	0	0	0	0	0	0	13
cluster_5399	GIAGVGKT	1	0	0	0	0	0	0	0	0	0	0	0	0	0	0	0	0	0	0	0	0	0	0	1	0	0	0	0	0	0	0	0	0	0	0	0	0	0	0	0	0	0	0	0	0	0	0	0
cluster_5401	multiple	multiple	1	0	0	3	0	0	1	0	0	7	12	7	3	1	1	2	1	1	4	0	4	3	7	0	16	4	0	0	0	0	0	0	0	0	0	0	1	0	0	0	2	0	0	0	0	0	1
cluster_5403	GVAGIGKS	2	0	0	0	0	0	0	0	0	0	0	0	0	0	0	0	0	0	0	0	0	0	0	1	0	0	0	0	0	0	0	0	0	0	0	0	0	0	0	0	0	0	0	0	0	0	0	0
cluster_5405	GVAGIGKS	2	0	0	0	0	0	0	0	0	0	0	0	0	0	0	1	0	0	0	0	0	0	1	6	1	1	0	0	0	0	0	0	0	0	0	0	0	0	0	0	0	0	0	0	0	0	0	0
cluster_5413	GVAGIGKS	2	0	0	0	0	0	0	0	0	4	0	0	0	0	0	0	0	0	16	1	0	0	1	6	0	0	0	0	0	0	0	0	0	0	1	0	0	0	0	0	0	0	0	0	0	0	0	0
cluster_5421	GVAGIGKS	2	0	0	0	0	0	0	0	0	0	0	0	0	0	0	0	0	0	1	0	0	0	0	9	0	0	0	0	0	0	0	0	0	0	0	0	0	0	0	0	0	0	0	0	0	0	0	0
cluster_5423	GVAGIGKS	2	0	0	0	0	0	0	0	0	0	0	0	0	1	0	0	0	0	0	0	0	0	0	3	0	0	0	0	0	0	0	0	0	0	0	0	0	0	0	0	0	0	0	0	0	0	0	0
cluster_5441	GVAGIGKS	2	0	0	0	0	0	0	0	0	0	3	0	0	0	0	0	0	0	2	0	0	0	0	5	0	0	0	0	0	0	0	0	0	0	0	0	0	0	0	0	0	0	0	0	0	0	0	0
cluster_5442	GVAGIGKS	2	0	0	0	0	0	0	0	0	0	0	0	0	0	0	0	0	0	0	0	0	0	0	2	0	0	0	0	0	0	0	0	0	0	0	0	0	0	0	0	0	0	0	0	0	0	0	0
cluster_5448	GVAGIGKS	2	0	0	0	0	0	0	0	0	1	0	0	0	0	0	0	0	0	0	0	0	0	0	4	0	0	0	0	0	0	0	0	0	0	0	0	0	0	0	0	0	0	0	0	0	0	0	0
cluster_5453	GVAGIGKS	2	0	0	0	0	0	0	0	0	42	0	0	23	0	68	23	35	0	0	0	0	0	2	9	0	0	0	0	0	0	0	0	0	0	0	0	0	0	0	0	0	0	0	0	0	0	0	0
cluster_5463	GIAGIGKT	3	0	0	0	0	0	0	0	0	0	1	9	15	0	0	0	10	0	2	0	0	0	0	1	0	3	1	0	0	0	0	0	0	0	0	0	0	0	0	0	0	0	0	0	0	0	0	0
cluster_5469	GIAGIGKT	3	0	0	0	0	0	0	0	0	15	36	29	26	21	33	21	24	17	38	11	0	23	26	5	6	21	20	0	0	1	1	1	0	0	2	1	14	0	0	0	0	3	0	0	0	0	0	1
cluster_5492	GIAGIGKT	3	0	0	0	0	0	0	0	0	0	0	0	0	0	0	0	0	0	0	0	0	0	0	3	0	0	0	0	0	0	0	0	0	0	0	0	0	0	0	0	0	0	0	0	0	0	0	0
cluster_5525	GVAGIGKT	4	0	0	0	0	0	0	0	0	39	105	101	3	88	52	39	79	16	57	75	5	37	52	14	1	70	63	0	0	0	0	0	0	0	0	0	0	0	0	0	0	0	0	0	1	0	0	0
cluster_5528	GVAGIGKT	4	0	0	0	0	0	0	0	0	0	0	0	0	0	0	0	0	0	0	0	0	0	0	8	0	0	2	0	1	0	0	0	0	0	0	0	0	0	0	0	0	0	0	0	0	0	0	0
cluster_5534	GVAGIGKT	4	0	0	0	0	0	0	0	0	0	0	0	36	0	0	0	0	0	0	0	0	0	29	12	0	0	0	0	0	1	0	0	0	0	0	0	0	0	0	0	0	0	0	0	0	0	0	0
cluster_5537	GVAGIGKT	4	0	0	0	0	0	0	0	0	0	0	0	0	0	0	0	0	0	21	0	0	0	0	10	0	0	0	0	0	0	0	1	0	0	1	3	0	0	0	0	0	0	0	0	0	0	1	0
cluster_5543	GIAGVGKT	1	0	15	4	10	0	0	0	0	0	0	0	0	0	0	1	1	4	0	0	0	0	0	0	30	0	0	0	0	0	0	0	0	5	1	1	0	16	0	0	0	0	7	0	3	0	1	2
cluster_5556	GIAGVGKT	1	0	0	0	0	0	0	0	0	0	0	5	0	0	0	0	0	0	0	0	0	0	0	0	5	6	8	0	0	0	0	0	0	0	0	0	0	0	0	0	0	0	0	0	0	0	0	0
cluster_5558	GIAGVGKT	1	0	1	0	0	0	0	0	0	0	0	0	0	0	0	0	0	10	0	0	0	0	0	0	14	0	0	0	0	0	0	0	0	0	0	0	0	0	0	0	0	0	0	0	0	0	0	0
cluster_5561	GIAGVGKT	1	0	0	0	0	0	0	0	0	3	4	0	12	0	7	1	6	23	6	2	1	0	8	1	29	0	1	0	0	0	0	0	0	0	0	0	7	0	0	0	0	3	0	0	0	0	0	0
cluster_5562	GIAGVGKT	1	0	0	0	0	0	0	0	0	0	0	3	5	0	6	2	1	4	1	0	0	2	5	0	14	1	0	0	0	0	0	0	0	0	1	0	0	0	0	0	0	0	0	0	0	0	0	0
cluster_5572	GVAGIGKS	2	0	0	0	0	0	0	0	0	1	0	16	0	0	0	0	0	1	7	8	0	2	0	0	12	1	2	0	0	0	0	1	0	0	0	0	0	0	0	0	0	0	0	0	0	0	0	1
cluster_5595	GVAGIGKS	2	0	0	0	0	0	0	0	0	5	0	0	0	0	0	0	0	0	0	0	0	7	9	0	11	0	0	0	0	0	0	0	0	0	0	0	0	0	0	0	0	0	0	0	0	0	0	0
cluster_5606	GVAGIGKS	2	0	0	0	0	0	0	0	0	21	48	11	37	24	4	1	28	15	14	23	0	14	2	4	16	19	39	0	0	0	0	0	0	0	0	0	0	0	0	0	0	0	0	0	1	0	0	0
cluster_5608	GVAGIGKS	2	0	0	0	0	0	0	0	0	0	0	0	0	0	0	0	0	0	0	0	0	0	0	0	12	0	0	0	0	0	0	0	0	0	0	0	0	0	0	0	0	0	0	0	0	0	0	0
cluster_5610	GVAGIGKS	2	0	0	0	0	0	0	0	0	0	0	0	0	0	0	0	1	0	0	15	0	15	0	0	19	0	0	0	0	0	0	0	0	0	0	0	0	0	0	0	0	0	0	0	0	0	0	0
cluster_5615	GVAGIGKS	2	0	0	0	0	0	0	0	0	14	27	0	1	8	0	1	3	19	1	1	0	2	4	0	10	0	0	0	0	0	0	0	1	0	0	0	0	0	0	0	0	0	0	0	0	0	0	1
cluster_5624	GVAGIGKS	2	0	0	4	0	0	0	0	0	0	35	2	2	0	3	47	5	12	22	3	0	8	23	8	12	16	15	0	5	7	0	2	1	1	1	0	2	0	0	2	0	8	3	1	1	1	1	15
cluster_5626	GVAGIGKS	2	0	0	0	0	0	0	0	0	17	39	48	22	8	11	8	12	9	13	21	0	7	11	0	14	2	5	0	0	1	0	0	0	5	0	1	1	0	0	0	0	0	2	2	4	0	0	3
cluster_5631	GVAGIGKS	2	0	0	0	0	0	0	0	0	0	0	0	0	24	0	0	1	21	0	19	0	0	0	0	15	0	0	0	0	0	0	0	0	0	0	0	0	0	0	0	0	0	0	0	0	0	0	0
cluster_5638	GVAGIGKS	2	0	0	0	0	0	0	0	0	1	1	4	9	0	10	0	1	13	1	0	1	7	0	0	7	1	3	0	0	0	0	0	0	0	0	0	0	0	0	0	0	0	0	0	0	0	0	0
cluster_5644	GIAGIGKT	3	0	0	0	0	0	0	0	0	0	8	1	6	0	1	0	0	3	4	2	0	3	2	1	31	0	1	0	0	0	0	0	0	0	0	2	0	0	0	0	0	0	0	0	0	0	0	0
cluster_5647	GIAGIGKT	3	0	0	0	0	0	0	0	0	0	0	0	0	0	0	0	2	0	0	0	0	0	0	0	4	0	0	0	0	0	0	0	0	0	0	0	0	0	0	0	0	0	0	0	0	0	0	0
cluster_5649	GIAGIGKT	3	3	2	1	0	6	0	3	6	0	27	15	14	16	0	1	16	15	35	9	0	12	7	3	17	18	10	0	0	1	2	2	0	0	0	0	0	1	2	0	1	2	1	0	1	0	0	11
cluster_5659	GIAGIGKT	3	0	0	0	0	0	0	0	0	10	0	18	0	3	0	0	0	0	0	1	0	0	0	0	17	2	1	0	0	0	0	0	0	0	0	0	0	0	0	0	0	0	0	0	0	0	1	0
cluster_5664	GIAGIGKT	3	0	0	0	0	0	0	0	0	0	0	0	0	0	0	0	0	0	0	0	0	0	0	0	29	0	0	0	0	0	0	0	0	0	0	0	0	0	0	0	0	0	0	0	0	0	0	4
cluster_5682	GIAGIGKT	3	0	0	0	0	0	0	0	0	1	0	0	0	0	2	0	0	0	0	0	0	0	1	0	1	0	0	0	0	0	0	0	0	0	0	0	0	0	0	0	0	0	0	0	0	0	0	0
cluster_5697	GIAGIGKT	3	0	0	0	0	0	0	0	0	0	0	0	1	0	0	0	0	0	0	0	0	0	4	0	1	0	0	0	0	0	0	0	0	0	0	0	0	0	0	0	0	0	0	0	0	0	0	0
cluster_5723	GVAGIGKT	4	0	0	0	0	0	0	2	0	0	0	0	0	35	0	11	0	0	14	13	1	0	8	10	9	4	16	0	0	0	0	0	3	0	0	0	0	0	0	0	0	0	0	0	0	0	0	2
cluster_5725	GVAGIGKT	4	0	0	0	0	0	0	0	1	16	2	3	3	0	3	0	0	5	7	4	0	0	0	4	20	1	3	0	0	0	1	0	0	0	0	0	0	0	0	0	0	0	0	0	0	0	0	0
cluster_5731	GVAGIGKT	4	0	0	0	0	0	0	0	0	0	17	15	3	7	7	10	5	5	9	0	1	11	21	3	11	21	19	0	0	0	0	0	0	0	0	0	0	0	0	0	0	0	0	0	0	0	0	0
cluster_5759	GIAGVGKT	1	0	0	0	0	0	0	0	0	0	0	0	0	0	1	0	0	0	0	0	0	0	0	0	0	1	0	0	0	0	0	0	0	0	0	0	0	0	0	0	0	0	0	0	0	0	0	0
cluster_5775	GIAGVGKT	1	5	2	0	1	2	4	3	3	0	0	24	36	1	2	0	1	0	1	0	0	0	0	0	0	17	18	0	0	0	0	2	0	0	0	0	0	0	0	0	0	0	0	0	0	0	0	0
cluster_5777	GVAGIGKS	2	0	0	0	0	0	0	0	0	0	0	24	0	0	0	0	0	0	0	0	0	0	0	0	10	17	31	0	0	0	0	0	0	0	0	0	0	0	1	0	0	0	0	0	0	0	0	2
cluster_5779	GVAGIGKS	2	0	0	0	0	0	0	0	0	0	1	0	0	0	0	10	0	0	11	0	0	0	0	0	0	26	29	0	0	0	0	0	0	0	0	0	0	0	0	0	0	0	0	0	0	0	0	3
cluster_5787	GVAGIGKS	2	0	0	0	0	0	0	0	0	0	0	16	0	19	0	0	0	0	0	0	0	0	0	2	0	9	3	0	0	1	0	0	0	0	0	0	0	0	0	0	0	0	0	0	0	0	0	0
cluster_5796	GVAGIGKS	2	0	0	0	0	0	0	0	0	0	0	0	0	0	0	0	0	0	0	0	0	0	0	0	0	2	1	0	0	0	0	0	0	0	0	0	0	0	0	0	0	0	0	0	0	0	0	0
cluster_5806	GVAGIGKS	2	0	0	0	0	0	0	0	0	0	0	0	0	0	0	0	0	0	0	0	0	0	0	0	0	17	16	0	0	0	0	0	0	0	0	0	0	0	0	0	0	0	0	0	0	0	0	0
cluster_5813	GVAGIGKS	2	0	0	0	0	0	0	0	0	0	0	0	1	0	0	1	0	0	1	0	0	1	1	0	0	1	0	0	0	0	0	0	0	0	0	0	0	0	0	0	0	0	0	0	0	0	0	0
cluster_5835	GVAGIGKS	2	0	0	0	0	0	0	0	0	0	0	0	0	0	0	0	0	0	0	0	1	0	0	3	0	14	11	0	0	0	0	0	0	0	0	0	0	0	0	0	0	0	0	0	0	0	0	0
cluster_5852	GIAGIGKT	3	0	0	0	0	0	0	0	0	1	0	4	5	1	5	0	5	2	1	0	0	1	2	0	0	1	0	0	0	0	0	0	0	0	0	0	0	0	0	0	0	0	0	0	0	0	0	0
cluster_5867	GIAGIGKT	3	0	0	0	0	0	0	0	0	2	2	1	6	3	2	3	3	2	1	4	1	2	2	0	0	1	0	0	0	0	0	0	0	0	0	0	0	0	0	0	0	0	0	0	0	0	0	0
cluster_5868	GIAGIGKT	3	0	0	0	0	0	0	0	0	0	0	0	0	0	0	0	0	0	1	0	0	0	1	0	0	5	2	0	0	0	0	0	0	0	0	0	0	0	0	0	0	0	0	0	0	0	0	0
cluster_5880	GIAGIGKT	3	0	0	0	0	0	2	3	1	0	3	29	34	9	4	3	0	3	4	1	0	3	4	0	4	24	18	0	0	0	0	0	1	0	0	0	1	0	1	0	0	0	0	0	0	0	0	0
cluster_5901	GIAGIGKT	3	0	0	0	0	0	0	0	0	0	0	0	0	0	0	0	0	0	0	0	0	0	0	0	0	20	7	0	0	0	0	0	0	0	0	0	0	0	0	0	0	0	0	0	0	0	0	0
cluster_5914	GIAGIGKT	3	0	0	0	0	0	0	0	0	0	0	2	0	3	1	0	0	0	0	0	1	15	2	1	0	18	28	0	0	0	0	0	0	0	0	0	0	0	0	0	0	0	0	0	0	2	0	0
cluster_5945	GVAGIGKT	4	0	0	0	0	0	0	0	0	0	0	0	0	0	0	0	0	0	0	0	0	0	0	0	0	1	0	0	0	0	0	0	0	0	0	0	0	0	0	0	0	0	0	0	0	0	0	0
cluster_5960	GIAGVGKT	1	0	0	0	0	0	0	0	0	4	10	9	11	5	7	4	5	12	8	5	0	6	18	2	0	2	2	0	0	0	0	0	0	1	0	0	0	0	0	0	0	0	0	0	0	0	0	2
cluster_5985	GVAGIGKS	2	0	0	0	0	0	0	0	0	0	0	0	0	0	0	0	0	0	0	0	0	1	1	0	7	7	9	0	0	0	0	0	0	0	0	0	0	0	0	0	0	0	0	0	0	0	0	0
cluster_6011	GVAGIGKS	2	0	0	0	0	0	0	0	0	0	0	9	48	0	18	15	1	19	3	0	0	0	23	14	0	18	12	0	0	0	0	0	0	0	0	0	0	0	0	0	0	0	0	0	0	0	0	0
cluster_6024	GVAGIGKS	2	0	0	0	0	0	0	0	0	0	0	57	31	0	0	0	0	0	0	0	0	0	2	0	5	44	49	0	0	0	0	0	0	0	0	0	0	0	1	0	0	0	0	0	0	0	0	1
cluster_6041	GVAGIGKS	2	0	0	0	0	0	0	0	0	0	0	0	2	0	0	0	0	0	0	0	0	0	0	1	0	3	8	0	0	0	0	0	0	0	0	0	0	0	0	0	0	0	0	0	0	0	0	0
cluster_6043	GVAGIGKS	2	0	0	0	0	0	0	0	0	55	59	41	54	39	51	44	17	34	25	27	3	26	46	10	27	25	38	0	0	3	1	1	3	0	1	1	0	2	0	2	2	2	1	4	1	0	1	0
cluster_6046	GVAGIGKS	2	0	0	0	0	0	0	0	0	0	0	0	0	0	0	0	0	0	21	14	1	0	0	0	0	13	27	0	0	0	0	0	0	0	0	0	0	0	0	0	0	0	0	0	0	0	0	9
cluster_6050	GVAGIGKS	2	0	0	0	0	0	0	0	0	7	1	16	0	0	5	11	7	8	10	9	0	0	8	0	0	24	27	0	1	1	2	0	4	0	1	0	0	1	1	1	0	1	0	2	1	0	0	6
cluster_6077	GIAGIGKT	3	0	0	0	0	0	0	1	1	0	11	14	0	1	0	0	0	16	18	0	0	0	7	0	11	10	15	0	0	0	0	0	0	0	0	0	0	0	0	0	0	0	0	0	0	0	0	0
cluster_6081	GIAGIGKT	3	0	0	0	0	0	0	0	0	0	0	0	0	0	0	0	0	0	1	0	0	0	1	0	0	6	9	0	0	0	0	0	0	0	0	0	0	0	0	0	0	0	0	0	0	0	0	0
cluster_6097	multiple	multiple	0	0	0	0	0	0	0	0	0	0	0	0	0	0	0	0	0	0	0	0	0	0	0	0	0	2	0	0	0	0	0	0	0	0	0	0	0	0	0	0	0	0	0	0	0	0	0
cluster_6103	GIAGIGKT	3	0	0	0	0	0	0	0	0	0	6	0	6	0	12	6	4	0	0	1	0	0	4	0	0	8	6	0	0	0	0	0	0	0	0	0	0	0	0	0	0	0	0	0	0	0	0	0
cluster_6140	GVAGIGKT	4	0	0	0	0	0	0	0	0	0	1	13	0	9	1	0	0	10	0	0	0	0	4	0	0	5	5	0	0	0	0	0	0	0	0	0	0	0	0	1	0	0	0	0	0	0	0	0
cluster_6143	GVAGIGKT	4	0	0	0	0	0	0	0	0	21	34	24	28	22	14	21	25	10	17	22	0	6	20	4	15	27	36	0	0	0	0	0	0	0	0	0	0	0	0	0	0	0	0	0	0	0	0	0
cluster_6171	GIAGVGKT	1	0	0	0	0	0	0	0	0	0	0	0	0	0	0	0	0	0	0	0	0	0	0	0	0	0	0	0	4	0	0	0	0	0	0	0	0	0	0	0	0	0	0	0	0	0	0	0
cluster_6191	GVAGIGKS	2	0	0	0	0	0	0	0	0	0	0	0	0	0	0	0	0	0	0	0	0	0	0	0	0	0	0	0	3	0	0	0	1	0	0	0	0	0	0	0	0	2	0	0	0	0	0	0
cluster_6225	GIAGIGKT	3	6	14	7	11	12	16	6	14	0	1	0	0	0	0	0	0	0	2	0	0	0	0	0	0	0	0	0	7	4	2	5	3	5	3	4	81	7	7	6	4	12	5	5	2	5	2	13
cluster_6226	GIAGIGKT	3	0	0	1	0	0	0	0	0	10	3	0	5	16	0	1	7	0	1	0	0	0	12	0	0	0	0	1	6	4	2	0	0	0	2	1	1	2	0	0	0	0	0	0	3	0	0	2
cluster_6234	GIAGIGKT	3	0	0	0	0	0	0	0	0	0	0	0	0	1	0	0	0	0	0	0	0	0	0	0	0	0	0	0	1	0	0	0	0	0	0	0	0	0	0	0	2	0	0	0	0	0	0	0
cluster_6236	GIAGIGKT	3	0	0	0	0	0	0	0	0	0	0	0	0	0	0	0	0	0	0	0	0	0	0	0	0	0	0	0	3	0	0	0	0	0	0	0	0	0	0	0	0	0	0	0	0	0	0	0
cluster_6268	GIAGVGKT	1	9	4	0	10	17	7	13	13	6	0	30	0	37	0	0	0	0	1	0	0	0	0	0	0	24	22	0	1	14	0	0	0	2	0	1	0	1	0	0	0	0	0	0	4	0	0	6
cluster_6273	GIAGVGKT	1	0	0	0	0	0	0	0	0	0	0	0	0	0	0	0	3	0	0	0	0	0	0	1	0	0	0	0	0	14	6	1	0	1	2	1	75	1	2	4	4	8	2	0	0	1	2	7
cluster_6287	GIAGVGKT	1	0	0	0	0	0	0	0	0	0	0	0	0	0	0	0	0	0	0	0	0	0	0	0	0	0	0	0	3	6	0	0	0	0	0	0	0	0	0	0	0	0	0	0	0	0	0	0
cluster_6290	GIAGVGKT	1	0	0	0	0	0	0	0	0	0	4	1	3	1	1	4	0	2	1	3	0	1	2	0	1	0	4	0	0	1	0	0	0	0	0	0	0	0	0	0	0	0	0	0	0	0	0	3
cluster_6296	GIAGVGKT	1	0	0	0	0	0	0	0	0	0	0	1	0	0	0	0	0	0	0	0	0	0	0	0	0	0	0	0	7	11	1	0	0	0	2	0	0	0	3	0	1	0	4	0	0	0	0	14
cluster_6307	GVAGIGKS	2	0	0	0	0	0	0	0	0	0	0	0	0	0	0	0	0	0	0	0	0	0	0	0	0	0	0	0	0	1	0	0	0	0	0	0	0	0	0	0	0	0	0	0	0	0	0	0
cluster_6308	GVAGIGKS	2	0	0	0	0	0	0	0	0	0	0	0	0	0	0	0	0	0	0	0	0	5	7	0	0	0	0	0	0	5	0	0	3	0	0	0	0	0	0	0	0	0	0	0	0	0	0	0
cluster_6310	GVAGIGKS	2	0	0	0	0	0	0	0	0	0	5	0	25	9	0	1	0	0	0	0	0	0	0	7	17	0	0	0	0	6	7	0	0	0	0	0	0	0	0	0	0	0	0	0	3	0	0	0
cluster_6311	GVAGIGKS	2	0	0	0	0	0	0	0	0	3	17	14	10	5	7	3	12	7	9	14	0	4	3	0	0	0	1	0	0	6	0	0	0	0	0	0	1	0	0	0	0	0	0	1	0	0	0	1
cluster_6318	GVAGIGKS	2	0	0	0	0	0	0	0	0	0	1	1	0	1	0	0	0	0	0	0	0	0	0	0	0	0	0	0	0	3	0	0	0	0	0	0	0	0	0	0	0	0	0	0	0	0	0	0
cluster_6324	GVAGIGKS	2	0	0	0	0	0	0	0	0	0	0	0	0	0	0	0	0	0	0	0	0	0	0	0	0	0	0	0	0	3	3	0	0	0	0	0	0	0	0	0	0	0	0	0	0	0	0	0
cluster_6329	GVAGIGKS	2	0	0	0	0	0	0	0	0	0	0	0	0	0	0	0	0	0	0	0	0	0	0	0	0	0	0	0	3	4	0	0	4	0	0	0	0	0	0	0	0	0	0	0	0	0	0	9
cluster_6341	GVAGIGKS	2	0	0	0	0	0	0	0	0	0	1	2	0	0	0	0	0	0	1	0	0	1	0	5	0	0	0	0	2	11	3	0	1	1	0	0	0	5	0	4	0	0	3	0	1	0	0	2
cluster_6345	GVAGIGKS	2	0	0	0	0	0	0	0	0	0	0	0	0	0	0	0	0	0	0	0	0	0	0	0	0	0	0	0	0	1	0	0	0	0	0	0	0	0	0	0	0	0	0	0	0	0	0	0
cluster_6347	GVAGIGKS	2	0	0	5	0	0	0	0	0	52	0	38	12	0	9	0	8	0	9	21	0	4	1	0	0	22	29	0	3	9	5	0	7	0	2	0	0	0	4	0	0	0	2	0	1	0	0	1
cluster_6351	GIAGIGKT	3	0	0	0	0	0	0	1	1	0	0	1	0	1	0	0	0	11	0	0	0	0	0	0	0	0	0	0	7	17	2	3	0	0	5	2	70	4	0	3	1	3	2	2	1	2	1	0
cluster_6352	GIAGIGKT	3	0	0	0	0	0	0	0	0	4	1	0	0	2	0	2	1	0	2	4	0	0	2	1	6	1	2	0	0	3	0	0	0	0	0	0	2	0	0	0	0	0	0	0	0	0	0	0
cluster_6357	GIAGIGKT	3	0	0	0	0	0	0	0	0	1	0	0	0	0	0	0	0	0	0	0	0	0	1	0	0	0	0	0	0	0	0	0	0	0	0	0	1	0	0	0	0	0	0	0	0	0	0	0
cluster_6358	GIAGIGKT	3	0	0	0	0	0	0	0	0	0	0	0	0	0	0	0	0	0	0	0	0	0	0	0	0	0	0	0	0	5	1	0	0	0	0	2	0	0	0	0	0	0	0	0	0	0	0	0
cluster_6359	GIAGIGKT	3	0	0	0	0	0	0	0	0	0	0	0	0	0	0	0	0	0	0	0	0	0	0	0	0	0	0	0	1	8	0	0	0	0	0	0	0	0	0	0	0	0	0	0	0	0	0	0
cluster_6360	GIAGIGKT	3	0	0	0	0	0	0	0	0	1	0	0	0	1	0	0	0	0	1	0	0	0	0	0	0	0	0	0	0	5	0	0	0	6	0	0	0	0	1	0	0	0	0	0	0	0	0	0
cluster_6373	GIAGIGKT	3	0	0	0	0	0	0	0	0	23	38	23	44	16	41	37	40	28	29	26	2	15	31	0	2	4	2	0	6	11	0	1	4	1	0	0	6	0	1	2	0	4	0	0	1	0	0	3
cluster_6376	GIAGIGKT	3	0	0	0	0	0	0	0	0	0	0	0	0	0	0	0	0	0	0	0	0	0	0	0	0	0	0	0	0	10	0	0	2	0	0	0	0	2	0	0	0	1	0	3	0	0	0	0
cluster_6377	GIAGIGKT	3	0	0	0	0	0	0	0	0	0	0	0	0	0	0	0	0	3	0	0	0	0	0	0	0	0	0	0	0	7	0	0	0	0	0	0	0	0	0	0	0	0	0	0	0	0	0	0
cluster_6379	GIAGIGKT	3	0	0	0	0	0	0	0	0	26	1	26	0	6	0	0	15	0	10	0	0	0	0	0	0	0	0	0	5	9	2	0	1	2	3	1	0	2	0	0	0	4	0	1	0	0	0	20
cluster_6381	GIAGIGKT	3	0	0	0	0	0	0	0	0	0	1	0	0	0	0	0	0	0	1	0	0	0	0	0	0	0	0	0	0	5	3	0	0	0	0	0	0	0	0	0	0	0	0	0	0	0	0	0
cluster_6390	GIAGIGKT	3	5	8	3	11	22	16	7	15	16	2	0	1	23	0	0	0	1	1	20	0	2	0	0	0	0	0	1	8	5	0	7	0	1	0	0	0	0	2	4	0	0	0	0	0	0	0	0
cluster_6504	GIAGIGKT	3	3	2	2	3	12	7	6	5	6	16	9	5	10	2	7	9	4	13	7	0	3	7	6	0	9	6	0	1	4	2	0	3	3	4	1	18	2	1	1	3	3	0	3	3	2	2	5
cluster_6509	GIAGIGKT	3	11	0	3	2	9	8	8	7	2	5	4	2	6	3	8	9	3	3	0	0	4	3	1	5	8	4	2	6	13	15	10	5	4	1	10	125	5	7	2	2	23	7	7	16	13	2	15
cluster_6513	GIAGIGKT	3	0	0	0	0	0	0	0	0	0	2	0	0	2	0	0	0	0	0	0	0	0	0	5	0	0	0	0	0	0	7	0	0	0	0	0	0	0	0	0	0	0	0	0	0	0	0	1
cluster_6514	GIAGIGKT	3	0	0	0	0	0	0	0	0	0	1	0	1	0	1	0	0	0	0	0	0	0	0	0	0	0	0	0	0	0	1	0	0	0	0	0	0	0	0	0	0	0	0	0	0	0	0	0
cluster_6516	GIAGIGKT	3	0	0	0	0	0	0	0	0	0	0	1	0	0	0	0	0	0	0	0	0	0	0	0	0	0	0	0	0	0	1	0	0	0	0	0	2	0	2	0	0	0	0	0	0	0	0	0
cluster_6525	GIAGIGKT	3	0	0	0	0	0	0	0	0	0	0	0	0	0	1	0	0	0	0	0	0	0	0	0	0	0	0	1	0	0	11	11	2	0	7	0	39	11	4	0	0	10	2	2	0	0	0	12
cluster_6535	GIAGIGKT	3	0	0	0	0	0	0	0	0	0	0	0	0	0	0	0	0	0	0	0	0	0	0	0	0	0	0	0	0	0	8	0	7	0	0	0	0	0	3	2	0	0	0	0	0	3	0	0
cluster_6542	GIAGIGKT	3	0	0	0	0	0	0	0	0	0	0	0	0	0	0	0	0	0	0	0	0	0	0	0	0	0	0	0	0	0	8	0	0	0	3	0	0	0	0	0	0	0	0	0	0	0	0	0
cluster_6549	GIAGIGKT	3	0	0	0	0	0	0	0	0	0	0	0	0	0	0	0	0	0	0	0	0	0	0	0	0	0	0	0	0	0	1	0	0	0	0	0	0	0	0	0	0	0	2	0	0	0	0	0
cluster_6565	GVAGIGKT	4	0	0	0	0	0	0	0	0	0	1	0	1	1	2	0	0	0	0	0	0	0	0	0	0	0	0	0	0	1	3	3	0	0	0	0	16	0	0	0	1	0	3	0	3	0	0	0
cluster_6566	GVAGIGKT	4	0	0	0	0	0	0	0	0	0	0	0	0	0	0	0	0	0	0	0	0	0	0	0	0	1	0	0	0	0	1	1	0	0	0	0	0	0	0	0	0	0	0	0	0	0	0	0
cluster_6567	GVAGIGKT	4	0	0	0	0	0	0	0	0	0	0	0	0	0	0	0	0	0	0	0	0	0	0	0	0	0	0	0	0	0	8	0	0	0	0	0	0	0	4	0	0	0	0	0	7	1	0	0
cluster_6576	GIAGVGKT	1	0	0	0	0	0	0	0	0	1	0	0	0	0	0	6	0	0	0	0	0	0	0	5	0	0	0	0	0	0	0	9	0	0	0	0	0	0	0	0	0	0	0	0	0	0	0	0
cluster_6578	multiple	multiple	0	0	0	0	0	0	0	0	0	0	0	0	0	0	0	0	0	0	0	0	0	0	0	0	0	0	0	0	0	0	4	0	0	0	2	6	0	0	0	0	0	2	0	0	0	0	0
cluster_6600	GVAGIGKS	2	0	0	0	0	0	0	0	0	0	0	0	1	0	0	0	1	0	0	0	0	0	0	0	2	2	0	0	1	1	0	2	0	0	0	2	4	0	0	2	0	0	0	0	0	0	0	0
cluster_6605	GVAGIGKS	2	0	0	0	0	0	0	0	0	0	0	0	1	0	0	0	0	0	0	12	2	0	0	0	0	0	0	0	0	0	0	11	0	0	0	0	0	0	0	0	2	0	0	1	0	0	0	0
cluster_6617	GVAGIGKS	2	0	0	0	0	0	0	0	0	0	0	0	5	0	0	0	4	1	0	0	0	0	0	0	4	0	0	0	0	0	0	5	5	0	0	2	0	0	1	3	0	1	0	0	0	0	0	7
cluster_6619	GVAGIGKS	2	0	1	1	1	3	2	0	0	1	0	3	2	0	2	0	0	1	1	0	0	0	0	3	0	0	0	0	2	0	0	5	2	0	0	0	48	0	0	3	0	0	0	0	0	0	0	0
cluster_6642	GIAGIGKT	3	26	20	5	18	35	32	26	36	10	0	0	0	0	0	0	0	0	0	0	0	0	0	3	0	0	0	0	0	0	0	15	13	0	6	0	0	0	0	2	0	0	0	1	0	0	0	7
cluster_6643	GIAGIGKT	3	0	1	0	0	0	0	0	0	0	1	0	0	0	0	0	0	0	0	0	0	0	0	0	0	0	0	0	5	0	2	7	0	0	0	1	0	3	4	0	0	4	0	0	1	0	0	3
cluster_6647	GIAGIGKT	3	0	0	0	0	0	0	0	0	0	0	0	0	0	0	0	0	0	0	0	0	0	0	0	0	0	0	0	0	0	0	8	0	0	0	0	0	0	0	0	0	0	0	0	0	0	0	0
cluster_6648	GIAGIGKT	3	0	0	0	1	0	0	0	0	0	0	1	0	0	0	0	0	0	0	0	0	0	0	0	0	0	0	0	1	0	0	7	0	0	0	0	5	1	0	0	0	1	0	0	1	0	0	0
cluster_6658	GIAGIGKT	3	0	0	5	0	0	0	0	0	8	15	13	11	9	14	5	2	5	10	6	0	6	12	0	13	3	4	0	2	5	6	5	0	0	3	0	64	0	2	3	0	9	5	1	6	8	0	3
cluster_6674	GIAGIGKT	3	0	0	0	0	0	0	0	0	3	4	0	0	0	6	0	0	0	1	0	0	0	0	0	0	0	0	0	0	0	1	4	1	0	0	0	1	0	0	0	0	0	0	0	0	0	0	0
cluster_6682	GVAGIGKT	4	0	0	0	0	0	0	0	0	0	0	0	0	0	0	0	0	0	0	0	0	0	0	0	0	0	0	0	4	0	3	4	0	2	1	3	0	1	0	0	0	0	0	0	0	0	0	0
cluster_6685	GVAGIGKT	4	0	0	0	0	0	0	0	0	3	10	4	3	0	6	0	0	3	6	0	0	0	3	0	0	0	0	0	2	3	0	7	0	1	4	0	0	2	0	0	0	8	0	1	4	1	0	0
cluster_6695	GIAGVGKT	1	0	0	0	0	0	0	0	0	3	16	50	3	10	1	12	23	28	11	9	3	1	11	7	9	3	2	0	1	3	0	1	10	0	0	0	0	0	1	1	3	0	0	0	0	0	0	5
cluster_6705	GIAGVGKT	1	0	0	3	0	0	0	0	0	7	22	41	1	10	0	0	18	6	0	0	0	3	5	0	0	7	6	1	0	2	2	0	9	3	0	31	1	0	0	3	0	9	11	0	0	0	0	12
cluster_6714	GIAGVGKT	1	0	0	0	0	0	0	0	0	0	0	0	0	0	0	0	0	0	0	0	0	0	0	0	0	0	0	0	0	0	0	0	6	0	5	0	0	0	0	0	0	0	0	0	0	0	0	0
cluster_6716	GIAGVGKT	1	1	1	0	1	0	0	0	2	0	0	0	0	0	0	0	0	0	0	0	0	0	0	0	0	0	1	0	0	0	0	0	4	0	0	0	0	0	0	0	0	0	0	0	0	0	0	0
cluster_6717	GIAGVGKT	1	0	0	0	0	0	1	1	0	1	1	2	1	0	3	0	2	2	1	0	0	3	0	0	0	0	0	0	1	0	1	0	1	0	0	0	0	0	0	0	0	0	0	0	2	0	0	0
cluster_6723	GVAGIGKS	2	0	0	0	0	0	0	0	0	0	0	0	0	0	0	0	0	0	0	0	0	0	6	0	0	0	0	0	0	0	0	0	6	0	0	4	0	0	0	5	0	6	2	0	0	0	0	2
cluster_6726	GVAGIGKS	2	0	0	0	0	0	0	0	0	16	50	28	43	6	61	28	107	38	27	29	7	11	53	43	18	8	2	0	0	0	0	0	13	0	0	4	3	1	0	0	8	0	0	3	2	6	0	20
cluster_6735	GVAGIGKS	2	0	0	0	0	0	0	0	0	0	0	0	0	1	0	0	0	0	0	0	0	0	1	0	2	0	0	0	0	0	0	0	16	0	0	5	0	2	0	0	0	0	0	0	0	0	0	1
cluster_6738	GVAGIGKS	2	0	0	0	0	0	0	0	0	0	1	0	0	0	0	0	8	0	0	0	0	0	9	0	0	0	0	0	0	1	0	0	9	0	0	3	0	0	0	0	0	0	0	0	4	0	0	0
cluster_6739	GVAGIGKS	2	0	0	0	0	0	0	0	0	0	0	0	0	0	0	0	0	0	0	0	0	0	0	0	0	0	0	0	0	0	0	0	10	0	0	0	0	0	1	0	1	0	0	0	0	0	0	0
cluster_6749	GVAGIGKS	2	0	0	0	0	0	0	0	0	4	26	20	33	9	19	9	22	9	24	8	2	12	16	2	0	2	0	0	1	0	0	0	10	0	0	0	0	0	0	0	3	0	0	0	2	0	0	1
cluster_6755	multiple	multiple	0	0	0	0	0	0	0	0	0	1	1	2	0	1	0	2	0	0	4	0	2	4	0	0	0	0	0	0	0	3	0	2	3	0	4	0	0	0	0	0	0	0	0	1	0	0	0
cluster_6769	GIAGIGKT	3	0	0	3	5	0	0	0	0	1	1	0	0	0	1	2	0	2	2	0	0	1	0	0	0	0	0	1	0	0	2	1	6	0	0	1	14	1	0	1	0	5	2	0	4	0	1	0
cluster_6780	GIAGIGKT	3	2	1	0	3	8	4	4	10	0	1	0	0	0	0	0	0	0	0	0	0	0	1	0	0	0	0	0	2	4	4	0	9	0	0	3	47	0	1	2	2	4	3	0	2	1	0	0
cluster_6781	GIAGIGKT	3	0	0	0	0	0	0	0	0	0	0	0	0	0	0	0	0	0	0	0	0	0	0	0	0	0	0	0	0	0	0	0	1	0	0	0	0	0	0	0	0	0	0	0	0	0	0	0
cluster_6783	multiple	multiple	0	0	0	0	0	0	0	0	0	0	0	0	0	0	0	0	0	0	0	0	0	0	0	0	0	0	0	0	0	0	0	9	0	0	0	0	0	0	0	0	0	0	0	0	0	0	0
cluster_6784	GIAGIGKT	3	0	0	1	0	0	0	0	0	1	3	1	1	1	0	2	1	4	0	0	0	1	0	0	0	0	0	0	0	0	0	0	8	1	2	0	1	3	0	0	0	0	3	0	0	0	2	0
cluster_6788	GIAGIGKT	3	0	0	0	0	0	0	0	0	7	4	2	3	4	4	7	10	16	5	0	0	9	8	8	0	0	0	0	5	10	2	0	16	0	0	1	15	3	0	3	0	3	0	0	1	0	4	1
cluster_6793	GIAGIGKT	3	0	0	0	0	0	0	0	0	3	1	29	8	4	4	0	1	2	18	0	1	0	9	0	0	0	0	0	1	4	0	3	9	0	0	2	0	0	0	0	0	4	0	1	0	0	0	0
cluster_6799	GIAGIGKT	3	0	0	0	0	0	0	0	0	3	0	1	3	3	0	0	0	1	0	0	0	0	0	1	1	0	3	0	0	0	0	1	3	0	0	1	13	0	0	0	0	0	0	0	0	0	0	0
cluster_6803	GIAGIGKT	3	5	7	10	8	12	12	9	10	3	35	50	37	33	26	37	26	6	15	38	0	28	37	9	20	15	14	0	6	4	5	7	7	1	3	6	39	2	3	2	1	3	1	2	6	4	2	12
cluster_6816	GVAGIGKT	4	0	0	0	0	0	0	3	0	2	1	0	2	0	0	1	3	0	0	0	0	0	0	4	0	2	4	0	0	2	0	0	8	0	0	0	0	0	0	0	0	0	1	0	0	0	0	0
cluster_6829	GIAGVGKT	1	0	0	0	0	0	0	0	0	0	0	0	0	0	0	0	0	0	0	0	0	0	0	0	0	0	0	0	1	3	0	1	0	5	0	0	0	6	0	0	0	0	1	0	0	4	0	2
cluster_6855	GVAGIGKS	2	0	0	0	0	0	0	0	0	0	0	0	0	0	0	0	0	0	0	0	0	0	0	0	0	0	0	0	0	1	0	0	0	4	0	0	0	0	0	0	0	0	0	0	0	0	0	0
cluster_6870	GVAGIGKS	2	0	0	0	0	0	0	0	0	0	0	0	0	0	0	0	0	0	0	0	0	0	0	0	0	0	0	0	0	0	0	0	0	3	0	0	0	0	0	0	0	0	0	0	0	0	0	0
cluster_6874	GVAGIGKS	2	0	0	0	0	0	0	0	0	0	11	17	10	0	24	0	0	12	0	0	0	0	10	0	8	0	0	0	3	5	8	13	0	13	0	3	0	0	2	0	0	0	0	0	9	0	0	0
cluster_6901	GIAGIGKT	3	0	0	0	0	0	0	0	0	0	0	0	0	0	0	0	0	0	0	0	0	0	0	0	0	0	0	0	0	0	0	0	0	7	0	0	0	0	0	0	0	7	0	0	0	0	0	0
cluster_6906	GIAGIGKT	3	0	0	0	0	0	0	0	0	0	0	0	0	0	0	0	0	0	0	0	0	0	0	0	0	0	0	0	0	0	0	0	0	4	0	0	0	0	0	0	0	0	0	0	0	0	0	0
cluster_6992	GVAGIGKS	2	0	0	0	0	0	0	0	0	15	0	0	17	10	35	17	16	3	17	15	0	23	0	0	0	0	0	0	0	0	7	0	6	0	5	1	0	8	4	2	0	0	2	0	0	3	1	0
cluster_6993	GVAGIGKS	2	0	0	0	0	0	0	0	0	0	0	0	0	0	0	0	0	0	0	0	0	0	0	1	0	0	0	0	0	0	0	0	0	0	5	0	0	0	0	0	0	0	0	0	0	0	0	0
cluster_7117	GVAGIGKS	2	0	0	0	0	0	0	0	0	5	11	9	3	0	5	0	0	8	7	0	0	0	5	0	5	0	0	1	0	0	0	0	0	0	0	13	10	0	0	0	0	0	0	0	0	2	0	0
cluster_7122	GVAGIGKS	2	0	0	0	0	0	0	0	0	1	0	1	0	0	0	2	0	0	0	7	0	3	1	0	4	0	0	0	0	1	0	0	0	0	0	10	6	0	0	0	0	2	0	0	1	0	0	2
cluster_7124	GVAGIGKS	2	0	0	0	0	0	0	0	0	0	0	0	0	0	0	0	0	0	0	0	0	0	0	0	0	0	0	0	0	0	0	0	0	0	0	14	0	4	0	0	4	12	0	0	0	2	0	0
cluster_7132	GVAGIGKS	2	0	0	0	0	0	0	0	0	0	0	0	0	0	0	0	0	0	0	0	0	0	4	0	0	0	0	0	0	0	0	0	7	0	0	8	0	1	0	0	1	0	0	4	0	0	0	0
cluster_7149	GVAGIGKS	2	0	0	0	0	0	0	0	0	0	6	0	0	0	0	0	0	0	0	0	0	0	0	0	0	0	0	0	0	0	0	0	0	0	5	5	0	0	0	1	0	5	0	0	0	0	0	0
cluster_7170	GIAGIGKT	3	0	0	0	0	0	0	0	0	0	0	1	0	0	1	0	0	1	0	0	0	0	0	0	0	0	0	0	0	0	0	0	0	0	0	1	0	0	0	0	0	0	0	0	0	0	0	0
cluster_7174	GIAGIGKT	3	0	0	0	0	0	0	0	0	0	0	0	0	0	0	0	0	0	0	0	0	0	0	0	0	0	0	0	0	2	0	0	0	0	5	3	28	3	0	0	0	0	1	2	2	3	2	0
cluster_7240	GVAGIGKT	4	0	0	0	0	0	0	0	0	0	0	0	0	0	0	0	0	0	0	0	0	0	0	0	0	0	0	0	0	0	0	0	0	0	0	0	0	0	0	0	0	0	0	0	0	0	0	0
cluster_7242	GIAGVGKT	1	23	9	1	11	33	22	14	14	26	25	20	19	16	18	14	24	10	9	16	3	2	17	4	10	6	11	2	5	13	25	3	9	8	4	9	246	23	11	5	9	2	6	10	8	14	12	1
cluster_7243	GIAGVGKT	1	1	0	0	0	0	1	0	0	0	1	0	0	0	0	0	0	0	0	0	0	0	1	0	0	0	0	0	0	0	0	1	0	0	0	0	15	0	0	0	0	0	0	0	2	0	0	1
cluster_7246	GIAGVGKT	1	0	0	0	1	0	0	0	0	0	1	0	1	0	0	3	0	1	0	0	0	1	0	0	1	0	0	0	0	0	0	0	0	3	0	0	120	0	9	0	1	0	0	0	0	0	0	0
cluster_7250	GIAGVGKT	1	1	0	0	0	0	0	0	0	0	1	0	0	0	2	3	0	0	0	0	0	0	2	0	2	1	0	0	3	3	8	1	9	0	0	1	101	14	1	2	2	6	1	2	0	3	0	1
cluster_7251	GIAGVGKT	1	0	0	0	0	0	0	0	1	0	0	0	0	0	0	0	0	0	0	0	0	0	0	0	0	0	0	0	0	0	0	0	0	0	0	0	103	0	0	0	0	1	0	0	0	0	0	1
cluster_7257	GIAGVGKT	1	0	0	0	0	0	0	0	0	68	2	3	51	0	125	33	77	0	0	10	2	0	12	16	0	0	0	0	0	0	0	0	0	0	0	0	94	0	0	0	0	0	0	0	0	0	0	0
cluster_7258	GIAGVGKT	1	0	0	0	0	0	0	0	0	0	0	0	0	1	0	0	0	0	3	0	0	0	3	0	0	1	1	0	0	11	0	0	17	0	2	8	91	9	0	3	0	0	5	0	0	0	0	0
cluster_7260	GIAGVGKT	1	0	1	1	1	0	0	0	0	4	18	6	9	3	12	5	4	5	5	9	0	4	10	1	3	3	4	1	0	1	3	1	2	0	1	0	123	2	0	1	0	0	0	0	1	0	1	8
cluster_7262	GIAGVGKT	1	0	5	4	11	0	0	0	0	18	2	1	0	0	0	21	12	10	0	3	0	0	5	0	0	0	0	0	0	0	0	2	0	0	2	0	161	1	8	0	1	0	6	0	6	1	6	0
cluster_7268	GIAGVGKT	1	0	0	0	0	0	3	0	2	0	0	4	0	1	0	0	1	1	0	0	0	0	2	1	0	4	1	0	0	10	0	0	0	0	8	0	134	0	12	1	0	1	6	0	13	0	2	0
cluster_7280	GIAGVGKT	1	1	0	1	3	3	0	2	1	0	2	0	1	0	0	0	0	0	0	0	0	1	0	0	0	0	1	0	0	0	0	0	1	0	0	0	50	0	0	0	0	0	0	0	0	0	0	0
cluster_7282	GIAGVGKT	1	0	0	0	0	0	0	0	0	0	0	0	0	0	0	0	0	0	0	0	0	0	0	0	0	0	0	0	0	0	0	0	0	0	0	0	176	0	0	0	0	0	0	2	0	0	1	0
cluster_7291	GIAGVGKT	1	0	0	0	0	0	0	0	0	0	0	0	0	0	0	0	0	0	0	0	0	0	0	0	0	0	0	0	1	0	2	0	0	0	0	0	11	0	1	0	1	0	1	0	0	0	1	1
cluster_7292	GIAGVGKT	1	0	1	0	0	0	0	0	0	0	1	0	0	2	0	0	0	0	0	0	0	0	1	0	7	0	0	0	4	12	10	0	6	0	1	0	85	3	1	3	4	10	0	0	1	0	2	12
cluster_7298	multiple	multiple	0	0	0	0	0	0	0	0	3	8	5	6	4	0	0	1	0	3	1	0	6	1	1	0	15	10	0	0	0	0	0	0	0	2	0	38	0	2	0	3	0	0	1	0	0	0	0
cluster_7305	GVAGIGKS	2	0	0	0	0	0	0	0	0	0	0	0	0	0	0	0	0	0	0	0	0	0	0	0	0	0	0	0	0	0	0	0	0	0	0	0	30	0	0	0	0	0	0	0	0	0	0	0
cluster_7307	GVAGIGKS	2	9	4	0	6	7	6	9	5	26	23	0	7	33	0	1	0	2	0	2	1	0	10	0	28	0	0	0	0	0	1	0	2	0	2	1	94	0	0	0	0	0	0	0	0	0	2	30
cluster_7311	GVAGIGKS	2	0	0	0	0	0	0	0	0	7	0	0	5	5	3	0	9	0	0	0	0	0	0	0	0	0	0	0	3	0	0	0	0	1	0	0	51	0	0	0	1	0	0	0	2	0	1	2
cluster_7322	GVAGIGKS	2	0	0	0	0	0	0	0	0	1	0	0	0	0	0	0	0	0	0	0	0	2	1	0	0	0	0	0	3	0	7	5	0	0	0	0	121	0	1	0	0	0	0	0	1	0	2	0
cluster_7326	GVAGIGKS	2	0	0	0	0	0	0	0	0	0	0	0	0	0	0	0	0	0	0	0	0	0	0	0	0	0	0	0	0	0	0	0	0	0	1	0	44	0	0	0	0	0	0	0	0	0	1	0
cluster_7330	GVAGIGKS	2	0	0	0	0	0	0	0	0	26	0	0	0	0	0	0	49	0	0	9	0	0	24	2	0	9	27	0	0	9	0	1	0	0	1	0	136	0	5	2	1	3	0	0	7	0	1	0
cluster_7337	GVAGIGKS	2	0	0	0	0	0	0	0	0	0	0	1	0	0	0	0	0	1	0	0	0	0	5	0	3	7	7	0	2	3	1	0	5	0	1	0	128	0	0	0	0	2	2	0	6	0	1	3
cluster_7342	GVAGIGKS	2	0	0	0	0	0	0	0	0	0	0	0	0	0	0	0	0	0	0	0	0	0	0	0	0	0	0	1	0	0	0	8	11	13	0	2	53	0	6	2	0	0	0	0	10	0	1	0
cluster_7348	GVAGIGKS	2	0	0	0	0	0	0	0	0	2	2	0	0	3	0	3	0	0	0	3	0	0	0	0	0	0	0	0	0	0	3	3	1	0	3	0	55	0	0	0	0	1	0	0	2	0	0	1
cluster_7349	GVAGIGKS	2	0	0	0	0	0	0	0	0	0	0	0	0	0	0	0	0	0	0	0	0	0	0	0	0	0	0	0	0	0	2	0	0	0	0	0	33	0	0	0	1	0	1	0	0	0	0	3
cluster_7354	GVAGIGKS	2	0	0	0	0	0	0	0	0	0	0	0	0	0	0	0	0	0	0	0	0	0	0	0	0	2	2	0	0	0	0	0	0	0	0	0	81	0	2	0	0	1	0	1	13	0	0	2
cluster_7359	GVAGIGKS	2	0	0	0	0	0	0	0	0	18	4	0	6	15	6	18	3	10	0	0	0	9	0	6	0	0	0	0	1	0	0	0	0	0	0	0	202	0	2	0	7	0	0	7	0	0	0	16
cluster_7363	GVAGIGKS	2	0	0	0	0	0	0	0	0	0	0	0	0	0	0	0	0	0	0	0	0	0	0	0	0	0	0	0	5	9	0	0	0	0	0	0	87	0	0	4	0	0	0	0	0	0	0	0
cluster_7365	GVAGIGKS	2	0	0	0	0	0	0	0	0	0	0	0	0	0	0	0	0	0	0	0	0	0	0	0	0	0	0	0	0	0	0	1	0	0	0	0	73	0	0	0	0	0	2	1	0	1	0	0
cluster_7374	GVAGIGKS	2	0	0	0	0	0	0	0	0	0	0	0	0	0	0	0	0	0	0	0	0	0	0	0	0	0	0	0	0	0	0	0	0	0	0	0	91	0	0	0	2	1	1	1	0	0	2	0
cluster_7375	GVAGIGKS	2	0	0	0	0	0	0	0	0	0	0	0	0	0	14	0	0	0	0	0	0	0	0	0	0	0	0	0	0	0	0	0	0	0	0	0	78	0	0	0	0	0	0	0	1	0	1	0
cluster_7376	GVAGIGKS	2	0	0	0	0	0	0	0	0	9	0	0	2	5	0	0	0	6	0	0	1	0	0	0	0	0	0	0	3	8	11	0	0	0	0	6	98	0	1	4	2	12	1	0	0	0	0	0
cluster_7377	GVAGIGKS	2	6	3	9	14	7	6	13	7	7	0	0	0	0	0	0	0	4	2	5	0	0	0	0	0	0	0	0	0	0	4	2	5	2	0	0	36	0	1	1	0	3	2	1	0	0	0	0
cluster_7384	GVAGIGKS	2	0	0	0	0	0	0	0	0	3	0	0	0	0	0	11	0	7	0	0	0	0	0	0	0	0	0	0	0	0	0	0	0	0	0	0	55	0	1	0	0	0	0	0	0	0	0	0
cluster_7385	GVAGIGKS	2	1	0	0	0	9	10	5	4	4	3	2	1	4	1	1	0	0	1	0	0	3	3	0	4	4	8	0	4	2	1	2	0	0	1	0	90	4	3	1	0	5	1	1	6	2	0	0
cluster_7388	GVAGIGKS	2	0	0	0	0	0	0	0	0	0	0	0	0	0	0	0	0	0	0	0	0	1	0	0	0	0	0	0	0	0	0	0	0	0	0	0	42	0	0	0	0	0	0	0	0	0	0	0
cluster_7391	GVAGIGKS	2	0	0	0	0	0	0	0	0	0	0	0	0	0	0	0	0	0	0	0	0	0	0	0	0	0	0	0	0	0	0	0	0	0	0	0	55	0	0	0	0	0	0	0	0	0	0	0
cluster_7397	GVAGIGKS	2	0	0	1	1	0	0	0	0	7	4	6	11	4	15	12	6	2	3	4	0	1	9	5	0	7	2	0	0	4	5	0	0	1	0	1	70	0	0	0	1	1	0	1	2	0	0	1
cluster_7399	GVAGIGKS	2	0	0	0	0	0	0	0	0	0	0	0	0	0	0	0	0	0	0	0	0	0	0	0	0	0	0	0	0	0	0	0	0	3	1	0	88	0	0	3	0	8	0	2	0	0	1	0
cluster_7415	GVAGIGKS	2	5	9	8	14	0	0	0	6	1	4	2	47	1	4	0	5	1	1	1	0	1	0	2	0	0	0	0	0	7	0	0	1	0	0	0	110	0	2	0	0	0	0	0	0	0	0	8
cluster_7421	GVAGIGKS	2	0	0	2	0	0	0	0	0	9	5	0	0	11	0	15	0	7	11	0	0	0	6	0	22	2	6	0	1	0	1	1	0	1	1	4	80	0	0	3	2	1	2	1	2	2	2	3
cluster_7423	GVAGIGKS	2	0	0	0	0	0	0	0	0	0	0	0	0	0	0	0	1	0	0	0	0	0	0	0	0	0	0	0	3	10	3	0	3	1	0	0	83	0	9	3	0	8	2	0	8	0	2	0
cluster_7433	GIAGIGKT	3	0	0	0	0	0	0	0	0	0	0	0	0	0	0	0	0	0	0	0	0	3	0	0	0	0	0	0	0	5	0	4	6	7	1	6	91	0	7	0	1	4	0	0	0	0	1	0
cluster_7434	GIAGIGKT	3	0	3	0	2	1	0	0	0	49	26	43	33	37	54	28	1	19	5	34	1	23	40	11	16	22	18	2	8	14	0	3	1	4	4	3	174	11	1	3	0	6	18	3	6	5	1	7
cluster_7436	GIAGIGKT	3	5	2	4	1	3	12	4	3	2	8	3	4	4	0	2	3	3	1	3	0	2	5	0	2	4	3	0	1	2	6	3	4	1	1	2	63	1	2	1	1	1	0	2	2	6	0	8
cluster_7438	GIAGIGKT	3	3	0	1	1	6	0	2	2	1	5	1	11	0	4	1	0	5	11	0	0	0	4	0	1	1	4	0	0	1	4	4	3	1	4	1	59	1	0	4	1	0	1	1	4	1	2	2
cluster_7457	GIAGIGKT	3	0	4	1	2	0	0	0	0	5	5	0	3	0	2	2	6	0	1	5	2	3	8	9	2	1	4	1	0	0	0	0	0	0	1	0	77	0	1	0	0	0	0	0	4	0	0	4
cluster_7464	GIAGIGKT	3	0	0	0	0	0	0	0	0	0	0	0	0	0	0	0	0	0	0	0	0	0	0	0	0	0	0	0	0	0	0	6	0	0	0	0	70	0	1	0	1	0	14	0	0	5	0	0
cluster_7467	GIAGIGKT	3	0	0	0	0	0	0	0	0	0	0	2	0	1	0	0	0	1	0	0	0	0	0	0	0	0	0	0	2	0	0	0	0	0	2	5	162	0	0	2	0	4	0	6	0	3	2	0
cluster_7470	GIAGIGKT	3	0	0	0	0	0	0	0	0	0	4	3	0	1	0	0	0	0	1	0	0	0	0	0	0	0	2	0	2	0	0	0	0	0	0	2	74	1	0	0	1	1	3	0	2	0	0	0
cluster_7479	GIAGIGKT	3	0	0	0	0	0	0	0	0	0	0	0	0	0	0	0	0	0	0	0	0	0	0	0	0	0	0	0	0	0	0	0	0	0	0	0	12	0	0	0	0	0	0	0	0	0	0	0
cluster_7488	GIAGIGKT	3	0	0	0	0	1	0	0	1	0	0	0	0	0	0	0	0	0	0	0	0	0	0	0	0	0	0	0	0	1	0	0	0	2	0	1	57	0	3	0	0	0	4	0	0	0	0	1
cluster_7491	GIAGIGKT	3	0	0	0	0	0	0	0	0	0	0	0	0	0	1	0	0	0	0	1	0	0	0	0	0	0	0	0	0	0	0	0	0	0	6	0	59	0	0	0	0	0	0	1	0	0	1	14
cluster_7505	GIAGIGKT	3	1	0	0	0	2	3	1	0	0	0	0	0	0	0	0	0	0	0	0	0	0	0	0	0	0	0	0	2	1	5	1	2	1	1	0	18	4	0	0	2	2	1	0	0	0	1	0
cluster_7506	GIAGIGKT	3	0	0	0	0	0	0	0	0	0	0	0	0	0	0	5	0	0	0	0	0	0	0	0	0	0	0	0	0	0	0	0	0	0	0	0	53	0	0	0	0	0	0	1	0	0	2	0
cluster_7508	GIAGIGKT	3	0	0	0	0	0	0	0	0	0	2	0	0	0	0	0	0	1	4	0	0	1	0	0	0	2	5	0	1	0	0	0	0	0	3	2	67	5	3	0	0	3	0	1	0	0	0	3
cluster_7522	GIAGIGKT	3	0	0	0	0	0	0	0	0	0	1	0	0	0	0	0	0	1	0	0	0	0	0	0	0	0	0	0	0	6	0	0	0	0	0	0	145	0	0	0	0	0	0	1	0	3	0	2
cluster_7526	GIAGIGKT	3	0	1	4	2	0	0	0	0	0	2	6	6	0	0	1	0	1	1	0	0	1	2	4	0	0	0	0	1	0	0	0	0	0	0	1	25	0	1	0	1	0	0	0	0	0	0	4
cluster_7576	GIAGIGKT	3	0	0	0	0	0	0	0	0	0	0	0	0	0	0	0	0	0	0	0	0	0	0	0	0	0	0	0	0	0	0	0	0	0	0	0	35	1	0	0	0	0	0	0	0	0	0	0
cluster_7580	GIAGIGKT	3	0	0	0	1	3	5	5	4	0	0	0	0	2	0	0	1	0	0	2	0	0	1	0	0	0	0	0	1	0	3	0	0	0	0	0	43	0	0	0	1	0	0	0	1	1	0	11
cluster_7584	GIAGIGKT	3	0	0	0	0	0	0	0	0	2	0	0	0	0	0	0	0	0	0	0	0	0	0	0	0	0	0	0	0	2	6	1	0	0	0	6	85	4	0	5	0	0	0	3	0	3	0	0
cluster_7585	GIAGIGKT	3	8	2	2	10	12	20	12	7	0	0	0	1	0	0	0	0	0	0	0	0	0	0	0	0	0	0	1	0	17	3	7	2	6	6	3	81	11	1	2	1	14	5	1	8	4	2	4
cluster_7589	GIAGIGKT	3	0	0	0	0	0	0	0	0	0	0	0	0	0	0	0	0	0	0	0	0	0	0	0	4	0	0	1	1	9	8	4	9	0	1	0	86	0	2	6	0	7	0	0	2	0	0	7
cluster_7594	GIAGIGKT	3	0	0	0	0	0	0	0	0	0	0	0	0	1	0	0	0	0	0	0	0	0	0	0	0	0	0	0	0	2	2	1	3	0	0	0	19	0	0	0	0	0	0	1	0	0	0	0
cluster_7624	GIAGIGKT	3	0	0	0	0	0	0	0	0	0	4	1	2	0	0	0	0	16	0	6	0	5	0	5	1	0	0	0	0	0	1	0	1	1	1	0	21	3	0	0	0	8	0	3	0	1	0	15
cluster_7625	GIAGIGKT	3	0	0	0	0	0	0	0	0	0	2	1	0	0	2	1	0	0	1	1	0	0	0	0	0	1	0	0	0	0	0	0	0	0	0	0	14	2	0	0	0	0	0	0	0	0	0	0
cluster_7629	GVAGIGKT	4	0	1	0	2	2	0	0	0	0	0	1	1	0	0	1	0	1	0	1	0	0	0	0	3	0	0	1	0	2	0	0	2	1	1	0	10	1	0	2	0	2	0	1	0	0	2	0
cluster_7633	GVAGIGKT	4	0	0	0	0	0	0	0	0	4	1	3	12	3	0	14	4	8	9	11	0	5	10	0	3	6	7	0	2	0	0	0	6	0	0	2	66	0	0	0	0	0	0	0	5	0	1	4
cluster_7638	GVAGIGKT	4	0	0	0	0	0	0	0	0	0	0	0	0	0	0	0	0	0	0	0	0	0	0	0	0	0	0	0	0	0	0	0	0	0	0	0	9	0	0	0	0	0	0	0	0	0	0	0
cluster_7639	GVAGIGKT	4	0	0	0	0	1	2	0	0	0	0	0	0	0	0	0	0	0	0	0	0	0	0	0	0	0	0	0	0	0	0	1	1	0	0	0	11	1	0	0	1	1	2	0	1	0	0	0
cluster_7644	GVAGIGKT	4	0	0	0	0	1	0	2	0	1	0	0	19	0	1	4	0	0	2	0	0	0	2	0	11	0	0	0	0	7	4	4	0	1	4	10	156	0	3	0	0	1	4	0	0	0	0	0
cluster_7649	GVAGIGKT	4	0	0	0	0	0	0	0	0	0	0	0	0	0	0	0	0	0	0	0	0	0	0	0	0	0	0	0	1	0	0	0	0	0	0	5	22	0	0	3	0	0	0	0	1	1	0	0
cluster_7689	GIAGVGKT	1	0	0	0	0	0	0	0	0	0	0	0	0	0	0	2	0	0	0	0	0	0	0	0	0	0	0	0	4	0	0	0	11	0	0	0	0	6	0	0	0	0	4	0	0	0	0	0
cluster_7708	GVAGIGKS	2	3	0	0	0	0	2	1	0	0	0	0	0	0	0	0	0	0	0	0	0	0	0	1	0	0	0	1	0	4	0	0	0	0	5	0	1	6	2	1	4	0	0	0	0	0	0	1
cluster_7716	GVAGIGKS	2	0	0	0	0	0	0	0	0	0	0	0	53	0	33	0	0	0	0	0	0	0	0	0	0	0	0	0	5	0	0	8	3	11	9	5	93	14	4	9	0	31	6	0	7	0	0	0
cluster_7732	GVAGIGKS	2	0	0	0	0	0	0	0	0	0	0	0	0	0	0	9	0	0	0	0	0	0	0	0	0	0	0	0	0	0	0	3	0	2	0	0	0	8	0	0	0	0	0	0	0	0	0	0
cluster_7741	GVAGIGKS	2	0	0	0	0	0	0	0	0	0	0	0	0	0	0	0	0	0	0	0	0	0	0	0	0	0	0	0	0	0	0	0	0	0	0	0	0	1	0	0	0	0	0	0	0	0	0	0
cluster_7748	GVAGIGKS	2	0	0	0	0	0	0	0	0	0	0	0	0	0	0	0	0	0	0	0	0	0	0	0	1	0	0	0	0	0	0	0	0	5	0	0	0	9	0	0	0	0	0	0	0	1	0	0
cluster_7749	GVAGIGKS	2	1	2	0	1	0	2	1	1	0	0	0	0	0	0	0	0	0	0	0	0	0	0	0	0	0	0	0	0	0	0	0	0	0	0	0	0	1	0	0	0	0	0	0	0	0	0	0
cluster_7752	GVAGIGKS	2	0	0	0	0	0	0	0	0	0	0	0	0	0	0	0	0	0	0	1	0	0	0	0	0	0	0	0	0	0	0	0	2	0	0	0	0	8	0	0	3	0	0	3	0	1	0	0
cluster_7771	GVAGIGKS	2	0	0	0	0	0	0	0	0	0	0	0	0	1	0	1	0	0	0	0	0	0	1	0	0	0	0	0	0	0	0	0	0	1	0	3	0	6	0	0	0	0	0	0	0	0	0	6
cluster_7776	GIAGIGKT	3	0	0	6	0	0	0	0	0	0	0	0	0	0	0	0	0	0	0	0	0	0	0	3	0	4	1	0	0	0	0	0	0	0	1	0	0	7	0	0	0	0	3	0	0	2	1	0
cluster_7873	GIAGVGKT	1	0	0	0	0	0	0	0	0	0	0	0	0	0	0	0	1	0	0	13	2	0	16	3	0	0	0	0	0	1	0	0	0	1	0	0	0	0	9	0	0	0	0	0	1	0	0	0
cluster_7883	GVAGIGKS	2	0	0	0	0	0	0	0	0	0	0	0	0	0	0	0	0	0	3	0	0	2	1	0	0	0	0	0	0	0	0	0	0	0	0	0	0	0	6	0	0	0	0	0	0	0	0	0
cluster_7911	GIAGIGKT	3	0	0	0	0	0	0	0	0	0	0	0	0	0	0	0	0	0	0	0	0	0	0	0	0	0	0	0	0	0	0	0	0	1	0	0	0	0	3	0	0	0	0	0	0	0	0	0
cluster_7938	GVAGIGKT	4	0	0	0	0	0	0	0	0	0	0	0	0	0	0	0	0	0	0	0	0	0	0	0	0	0	0	0	0	0	0	7	0	1	0	4	2	4	4	0	0	0	0	4	0	0	0	0
cluster_7999	GIAGIGKT	3	0	0	0	0	0	0	0	0	0	0	0	0	0	0	0	0	0	0	0	0	0	0	0	0	0	0	0	0	0	0	0	0	5	0	0	1	0	2	6	0	0	0	0	0	0	0	0
cluster_8001	GIAGIGKT	3	0	0	0	0	0	0	0	0	0	0	0	0	0	13	0	0	1	0	17	4	19	8	0	3	0	0	0	0	0	0	0	2	0	0	2	7	0	0	4	0	0	0	0	4	0	1	0
cluster_8002	GIAGIGKT	3	0	0	2	0	0	0	0	1	0	4	0	0	0	0	0	0	2	0	0	0	0	1	0	0	2	2	0	0	0	0	6	0	0	0	0	1	0	0	6	1	0	0	0	0	0	0	1
cluster_8007	GIAGIGKT	3	0	0	0	0	0	0	0	0	8	0	0	0	3	0	6	0	6	0	0	0	5	0	3	0	0	0	0	0	0	0	0	0	0	0	15	84	0	1	7	0	0	0	0	0	0	0	0
cluster_8020	GVAGIGKT	4	0	0	0	0	0	0	0	0	0	10	14	0	32	0	0	1	12	9	0	0	0	10	5	0	14	12	0	0	0	0	0	0	0	0	0	0	0	0	6	0	0	0	0	0	0	0	0
cluster_8038	GIAGVGKT	1	0	0	0	0	0	0	0	0	0	1	0	0	0	1	0	0	0	0	0	0	0	0	0	0	0	0	0	0	0	0	0	0	0	0	0	0	12	0	0	7	0	0	0	0	0	0	0
cluster_8069	GVAGIGKS	2	0	0	0	0	0	0	0	0	0	0	0	0	0	0	0	0	0	0	0	0	0	0	0	0	0	0	0	3	1	5	0	0	0	0	0	0	0	0	2	5	0	0	2	0	0	0	0
cluster_8075	GVAGIGKS	2	0	0	0	0	0	0	0	0	0	0	0	0	0	0	0	0	0	11	0	0	0	0	0	0	0	0	0	0	0	4	0	0	0	0	0	0	0	0	2	3	9	3	3	4	0	0	0
cluster_8079	GIAGIGKT	3	0	0	0	0	0	0	0	0	0	0	0	0	0	0	0	0	0	0	0	0	0	0	0	0	0	0	0	0	0	0	0	0	0	0	0	1	0	0	0	7	0	0	3	0	0	0	0
cluster_8303	GIAGIGKT	3	0	0	0	0	0	0	0	0	0	1	5	1	1	0	1	5	1	1	4	0	1	0	0	0	0	0	0	0	0	0	0	0	0	0	0	0	0	0	0	0	4	0	0	0	0	0	0
cluster_8331	GIAGVGKT	1	0	0	0	0	0	0	0	0	0	0	0	0	0	0	0	0	0	0	0	0	0	0	0	0	0	0	0	0	0	0	0	0	0	0	0	0	0	0	0	0	0	12	0	0	0	0	0
cluster_8336	GIAGVGKT	1	0	0	0	0	0	0	0	0	0	0	0	0	0	0	0	0	0	0	0	0	0	0	0	0	0	0	0	0	0	0	2	0	0	0	1	0	0	0	0	0	0	2	0	0	0	0	0
cluster_8339	GIAGVGKT	1	0	0	0	0	0	0	0	0	0	0	0	0	0	0	0	0	0	0	0	0	0	0	0	0	0	0	0	0	0	0	2	0	4	0	0	0	8	1	0	0	4	5	0	9	0	7	0
cluster_8364	GVAGIGKS	2	0	0	0	0	0	0	0	0	0	0	0	0	0	0	0	0	0	0	0	0	0	0	2	2	2	2	0	0	0	0	5	0	0	0	2	0	0	0	0	3	0	9	1	0	1	0	0
cluster_8404	GVAGIGKS	2	0	0	0	0	0	0	0	0	0	0	0	0	0	0	2	0	0	0	0	0	0	0	0	0	0	0	0	0	0	0	0	0	0	0	0	0	0	0	0	0	0	2	0	0	0	0	0
cluster_8412	GVAGIGKS	2	0	0	0	0	0	0	0	0	0	0	0	0	0	0	0	0	0	0	0	0	0	0	0	0	0	0	0	0	0	0	0	0	0	0	1	0	0	0	0	0	0	3	0	0	0	0	0
cluster_8417	GVAGIGKS	2	0	0	0	0	0	0	0	0	0	0	0	0	0	0	0	0	0	0	0	0	0	0	0	0	0	0	0	0	0	0	0	0	0	0	0	0	0	0	0	0	0	0	0	0	0	0	0
cluster_8430	GIAGIGKT	3	0	0	0	0	0	0	0	0	0	0	0	0	0	0	0	0	0	0	0	0	0	0	0	0	0	0	0	0	0	0	0	0	0	2	0	0	0	0	0	0	0	4	0	0	1	3	0
cluster_8448	GIAGIGKT	3	0	0	0	0	0	0	0	0	0	0	0	0	0	0	0	0	0	0	0	0	0	0	0	0	0	0	0	0	0	0	0	0	0	0	0	0	0	0	0	1	0	11	4	0	0	0	0
cluster_8455	GIAGIGKT	3	0	0	0	0	0	0	0	0	0	0	0	0	0	0	0	0	0	0	0	0	0	0	0	0	0	0	0	0	1	0	1	0	0	2	0	0	5	1	0	0	0	5	0	0	0	0	0
cluster_8487	GVAGIGKT	4	3	5	2	13	17	9	8	10	11	13	15	2	4	11	2	6	8	6	11	0	2	7	5	12	14	12	0	3	0	0	1	0	0	0	3	0	1	1	0	0	1	5	1	11	0	0	8
cluster_8491	GVAGIGKT	4	0	0	0	0	0	0	0	0	0	0	0	0	0	0	0	0	0	0	0	0	0	0	0	0	0	0	0	0	0	0	0	0	0	0	0	0	0	0	0	0	0	8	8	0	0	0	0
cluster_8493	GVAGIGKT	4	0	0	0	0	0	0	0	0	0	0	0	0	0	0	0	0	0	0	0	0	0	0	0	0	0	0	0	0	0	0	0	0	0	0	0	0	0	0	0	0	0	5	3	0	0	0	0
cluster_8527	GVAGIGKS	2	0	0	0	0	0	0	0	0	3	2	0	2	0	3	0	1	0	2	1	0	0	1	0	0	0	0	0	4	2	0	0	0	2	1	2	0	0	0	0	0	0	0	7	1	0	0	1
cluster_8536	GVAGIGKS	2	0	0	0	0	1	2	0	2	0	1	1	0	0	0	0	0	0	0	0	0	0	0	0	0	0	0	0	0	1	1	1	0	1	0	0	19	0	0	0	0	0	0	2	0	1	0	0
cluster_8567	GVAGIGKT	4	0	0	0	0	0	0	0	0	18	0	15	0	0	0	12	8	0	0	7	0	11	2	0	0	0	0	0	0	0	0	0	0	6	2	0	0	0	1	0	0	0	0	8	0	0	1	4
cluster_8575	GVAGIGKT	4	0	0	0	0	0	0	0	0	0	0	0	0	0	0	0	0	0	0	9	0	3	0	0	0	0	0	0	0	0	0	0	0	0	0	0	0	0	0	0	0	0	0	7	0	0	1	0
cluster_8591	GIAGVGKT	1	0	1	1	1	0	0	1	0	0	0	0	0	0	0	0	2	0	0	0	0	0	0	0	0	0	0	0	0	0	1	0	0	0	4	0	0	2	1	0	0	0	0	0	9	0	0	0
cluster_8593	GIAGVGKT	1	0	0	0	0	0	0	0	0	0	0	0	0	1	1	4	1	0	0	0	0	0	5	0	0	0	0	0	1	0	0	0	0	0	0	0	0	0	0	0	0	0	0	0	14	0	0	1
cluster_8603	GIAGVGKT	1	2	0	0	1	0	0	0	2	1	1	0	1	1	0	4	0	1	1	0	0	0	0	0	3	0	3	0	0	2	3	0	0	0	0	0	2	0	0	0	0	0	0	0	4	0	0	1
cluster_8626	GVAGIGKS	2	0	0	0	0	0	0	0	0	0	0	0	0	0	0	0	0	0	0	0	0	0	0	0	0	0	0	0	0	0	0	0	0	0	0	0	0	0	0	0	0	0	0	0	5	0	0	0
cluster_8640	GVAGIGKS	2	0	0	0	0	0	0	0	0	0	0	0	3	0	1	0	0	0	0	1	0	0	0	0	0	0	0	0	0	0	0	0	2	0	0	0	0	0	0	0	0	0	2	0	5	0	0	0
cluster_8654	GVAGIGKS	2	0	0	0	0	0	0	0	0	0	0	0	0	0	0	0	0	0	0	0	0	0	0	0	0	0	0	0	0	0	0	0	0	0	0	0	0	0	1	0	1	0	0	0	3	0	0	0
cluster_8661	GVAGIGKS	2	0	0	0	0	0	0	0	0	7	0	0	0	0	0	0	0	0	0	2	1	0	3	0	0	0	0	1	0	0	0	0	0	3	0	0	0	0	0	0	0	0	3	0	8	0	0	0
cluster_8746	GIAGVGKT	1	0	0	11	0	0	0	0	0	24	145	182	54	111	36	170	217	202	106	65	4	39	64	71	70	6	8	0	7	33	34	4	12	0	1	27	1	8	3	3	0	3	9	0	14	7	1	48
cluster_8754	GVAGIGKS	2	0	0	0	0	0	0	0	0	0	0	0	0	33	0	0	0	0	0	0	0	0	10	0	0	23	31	0	0	0	0	11	0	0	0	0	0	10	0	0	0	0	0	0	0	6	0	0
cluster_8791	GIAGIGKT	3	0	0	0	0	0	0	0	0	0	1	9	0	0	0	7	6	1	11	0	1	0	0	0	0	0	0	0	0	0	0	0	0	0	0	0	2	1	0	0	0	2	0	2	0	5	0	5
cluster_8792	GIAGIGKT	3	0	0	0	0	0	0	0	0	0	0	0	0	0	0	0	0	0	0	0	0	0	0	0	0	0	0	0	0	0	0	0	0	0	0	0	0	0	0	0	0	0	0	0	1	6	0	3
cluster_8939	GVAGIGKS	2	0	0	0	0	0	0	0	0	0	0	0	0	0	0	0	0	0	0	0	0	0	0	0	0	0	0	0	0	0	0	0	0	0	1	0	0	0	1	0	0	4	1	0	0	0	0	7
cluster_8945	GVAGIGKS	2	0	0	0	0	0	0	0	0	0	0	0	0	0	0	0	0	0	0	0	0	0	0	0	0	0	0	0	0	0	0	0	0	0	0	0	0	0	0	0	0	0	0	0	0	0	0	18
cluster_8948	GVAGIGKS	2	0	0	0	0	0	0	0	0	0	0	0	0	0	0	0	0	0	0	0	0	0	0	0	0	0	0	0	0	0	0	0	0	0	0	0	0	0	0	0	0	0	0	0	0	0	0	13
cluster_8974	multiple	multiple	0	0	0	0	0	0	0	0	0	0	0	0	0	0	0	0	0	0	0	0	0	0	0	0	0	0	0	0	0	0	0	0	0	0	0	0	0	0	0	0	0	0	0	0	0	0	4
cluster_8979	GVAGIGKS	2	0	0	0	0	0	0	0	0	0	0	0	0	0	0	0	0	0	0	0	0	0	0	0	0	0	0	0	0	0	0	0	0	0	0	0	0	0	0	0	0	0	0	0	0	0	0	3
cluster_9023	GIAGIGKT	3	0	0	0	0	0	0	0	0	0	0	0	0	0	0	0	0	0	0	0	0	0	0	0	0	0	0	0	0	0	1	0	0	0	1	0	0	0	0	0	0	0	0	0	0	0	0	9
cluster_9088	GIAGIGKT	3	0	0	0	0	0	0	0	0	0	0	0	0	0	0	0	0	0	0	0	0	0	0	0	0	0	0	0	0	0	0	0	0	0	0	0	0	0	0	0	0	0	0	0	0	0	0	2
cluster_9112	GIAGIGKT	3	0	0	0	0	0	0	0	0	0	0	0	5	3	0	0	0	0	0	0	0	0	2	0	0	0	0	0	0	0	0	0	0	0	0	0	0	0	0	0	0	0	0	0	0	0	0	5
cluster_9170	GVAGIGKT	4	0	0	0	0	0	0	0	0	0	0	0	0	0	0	0	0	0	0	0	0	0	0	0	0	0	0	0	0	0	0	0	0	0	0	0	0	0	0	0	0	0	0	0	0	0	0	6
cluster_9271	GVAGIGKS	2	0	0	0	0	0	0	0	0	0	0	0	0	0	0	0	0	0	0	0	0	0	0	0	0	0	0	0	0	0	0	0	0	0	0	0	0	0	0	0	1	0	0	0	0	3	0	0
cluster_9279	GVAGIGKS	2	0	0	0	0	0	0	0	0	0	4	0	0	5	0	0	0	0	0	0	0	0	0	0	0	6	6	0	0	0	0	0	0	0	0	0	0	0	0	0	0	0	0	0	1	0	0	0
cluster_9310	GIAGIGKT	3	0	0	0	0	0	0	0	0	0	0	0	0	0	0	0	0	0	0	0	0	0	0	0	0	0	0	0	0	0	0	0	0	0	0	0	0	0	0	0	0	0	0	0	0	0	0	0
cluster_9376	GIAGIGKT	3	0	0	0	0	0	0	0	0	0	0	0	0	0	0	0	0	0	0	0	0	0	0	0	0	0	0	0	0	0	0	0	0	0	0	0	1	0	0	0	0	0	0	0	0	0	0	10
cluster_9380	GIAGIGKT	3	0	0	0	0	0	0	0	0	0	0	0	1	0	0	0	0	1	3	0	0	0	0	0	0	0	0	0	0	0	0	1	0	0	0	0	0	0	0	0	0	0	0	0	0	4	0	0
cluster_9394	GIAGIGKT	3	0	0	0	0	0	0	0	0	0	0	0	0	2	0	0	0	0	0	0	0	0	1	0	0	0	0	0	0	0	0	0	0	0	0	0	0	0	0	0	0	0	0	0	0	0	0	0
cluster_9399	GIAGIGKT	3	0	0	0	0	0	0	0	0	0	0	0	0	0	0	7	0	0	1	0	0	0	1	0	0	0	0	0	0	0	0	0	0	0	0	0	0	0	0	0	0	0	0	0	0	0	0	0
cluster_9423	GVAGIGKT	4	0	0	0	0	0	0	0	0	0	0	0	0	0	0	0	0	0	0	0	0	0	0	0	0	0	0	0	0	0	0	0	0	0	0	0	0	0	0	0	0	0	0	0	0	0	0	0
cluster_9447	GIAGVGKT	1	0	0	0	0	0	0	0	0	0	0	0	0	0	0	0	0	0	0	0	0	0	0	0	0	0	0	0	0	0	0	0	0	0	0	0	0	0	0	0	0	0	0	0	0	0	0	0
cluster_9465	GIAGVGKT	1	0	0	0	0	0	0	0	0	0	0	0	0	13	0	0	10	3	8	0	0	0	0	0	0	0	0	0	0	0	0	0	0	0	0	0	0	0	0	0	0	0	0	0	0	0	0	2
cluster_9476	GVAGIGKS	2	0	0	0	0	0	0	0	0	0	0	9	0	0	0	0	0	0	0	0	0	2	2	0	0	0	0	0	0	4	11	0	0	0	0	0	0	0	0	0	0	0	0	0	0	0	0	0
cluster_9510	GVAGIGKS	2	0	0	0	0	0	0	0	0	0	0	0	0	0	0	0	0	0	0	0	0	0	0	0	0	0	0	0	0	0	0	0	0	0	0	0	0	0	0	0	0	0	0	0	0	0	0	0
cluster_9535	GVAGIGKS	2	0	0	0	0	0	0	0	0	0	0	0	0	0	0	0	0	0	0	0	0	0	0	0	0	0	0	0	0	0	0	0	0	0	0	0	0	0	0	0	0	0	0	0	0	0	0	0
cluster_9547	GVAGIGKS	2	0	0	0	0	0	0	0	0	0	0	0	0	0	0	0	0	0	0	0	0	0	0	0	0	0	0	0	0	0	0	0	0	0	0	0	0	0	0	0	0	0	0	0	0	0	0	0
cluster_9610	GIAGIGKT	3	0	0	0	0	0	0	0	0	0	0	0	3	0	0	0	0	0	0	0	0	0	0	0	0	0	0	0	0	0	0	0	0	0	0	0	0	0	0	0	0	0	0	0	0	0	0	0
cluster_9641	GIAGIGKT	3	0	0	0	0	0	0	0	0	0	0	0	0	0	0	0	0	0	0	0	0	0	0	0	0	0	0	0	0	0	0	0	0	0	0	0	0	0	0	0	0	0	0	0	0	0	0	0
cluster_9661	GIAGIGKT	3	0	0	0	0	0	0	0	0	0	0	0	0	0	0	0	0	0	0	1	0	0	0	0	0	0	0	0	0	0	0	0	0	0	0	0	0	0	0	0	0	0	0	0	0	0	0	0
cluster_9663	GIAGIGKT	3	0	0	0	0	0	0	0	0	0	0	0	0	0	0	0	0	0	0	0	0	0	0	0	0	0	0	0	0	0	0	0	0	0	0	0	0	0	0	0	0	0	0	0	0	0	0	0
cluster_9726	GIAGVGKT	1	0	0	0	0	0	0	0	0	0	0	0	0	0	0	0	0	0	0	0	0	0	0	0	0	0	0	1	0	0	0	0	3	0	0	0	17	0	1	0	0	0	0	0	0	0	0	0
cluster_9741	multiple	multiple	0	0	0	0	0	0	0	0	0	0	0	0	0	0	0	0	0	0	0	0	0	0	0	0	0	0	0	0	0	1	0	1	0	0	0	0	0	0	2	0	0	0	0	0	0	0	9
cluster_9758	GVAGIGKS	2	0	0	0	0	0	0	0	0	0	0	0	0	0	0	0	26	0	0	0	0	0	0	0	0	0	0	0	0	0	0	0	0	0	0	0	0	0	0	0	0	0	0	0	0	0	0	1
cluster_9759	GVAGIGKS	2	0	0	0	0	0	0	0	0	23	43	20	17	7	18	29	18	15	18	4	1	0	10	16	26	0	1	0	3	0	0	0	2	0	3	0	0	5	0	1	0	0	2	0	0	0	5	0
cluster_9762	GVAGIGKS	2	0	0	0	0	0	0	0	0	10	0	0	0	0	1	8	0	16	0	0	0	0	0	0	0	0	0	0	0	0	0	0	0	0	0	0	0	0	1	0	0	0	0	0	0	0	0	0
cluster_9818	GIAGIGKT	3	0	0	0	0	0	0	0	0	0	0	0	0	0	0	0	0	0	0	0	0	0	0	0	0	0	0	0	0	0	0	0	0	0	0	0	20	0	0	0	0	0	0	0	0	0	0	0
cluster_9899	GIAGVGKT	1	18	20	5	16	39	30	19	24	0	12	4	7	17	9	8	14	8	19	13	0	2	10	3	2	22	34	0	12	23	10	0	12	5	4	4	48	14	9	15	9	6	2	8	2	10	8	3
cluster_2	GIAGVGKT	1	0	0	0	0	0	0	0	0	0	0	0	0	0	0	0	0	0	0	0	0	0	0	0	0	0	0	0	0	0	0	0	0	0	0	0	0	0	0	0	0	0	0	0	0	0	0	0
cluster_3	GIAGVGKT	1	3	1	0	7	6	6	9	4	0	0	0	0	0	0	0	0	1	0	0	0	0	0	0	0	0	0	0	0	0	0	0	0	0	0	0	0	0	0	0	0	0	0	0	0	0	0	0
cluster_4	GIAGVGKT	1	0	0	0	0	0	0	0	0	0	0	0	0	0	0	0	0	0	0	0	0	0	0	0	0	0	0	0	0	0	0	0	0	0	0	0	0	0	0	0	0	0	0	0	0	0	0	0
cluster_5	GIAGVGKT	1	43	23	11	35	63	52	47	42	24	54	0	68	16	17	15	9	7	29	14	2	10	37	12	10	7	12	2	0	5	8	0	9	0	1	3	0	0	4	2	2	20	3	5	3	6	0	6
cluster_6	GIAGVGKT	1	131	44	32	52	179	172	150	168	0	0	0	0	0	0	0	0	0	0	0	0	0	0	0	0	0	0	0	0	0	0	0	0	0	0	0	0	0	0	0	0	0	0	0	0	0	0	0
cluster_7	GIAGVGKT	1	0	0	0	0	0	0	0	0	0	0	0	0	0	0	0	0	0	0	0	0	0	0	0	0	0	0	0	0	0	0	0	0	0	0	0	0	0	0	0	0	0	0	0	0	0	0	0
cluster_8	GIAGVGKT	1	0	0	0	0	0	0	0	0	0	0	0	0	0	0	0	0	0	0	0	0	0	0	0	0	0	0	0	0	0	0	0	0	0	0	0	0	0	0	0	0	0	0	0	0	0	0	0
cluster_9	GIAGVGKT	1	0	0	0	0	0	0	0	0	0	0	0	0	0	0	0	0	0	0	0	0	0	0	0	0	0	0	0	0	0	0	0	0	0	0	0	0	0	0	0	0	0	0	0	0	0	0	0
cluster_20	GIAGVGKT	1	0	0	0	0	0	0	0	0	0	0	0	0	0	0	0	0	0	0	0	0	0	0	0	0	0	0	0	0	0	0	0	0	0	0	0	0	0	0	0	0	0	0	0	0	0	0	0
cluster_23	GIAGVGKT	1	0	0	0	0	0	0	0	0	0	0	0	0	0	0	0	0	0	0	0	0	0	0	0	0	0	0	0	0	0	0	0	0	0	0	0	0	0	0	0	0	0	0	0	0	0	0	0
cluster_24	GIAGVGKT	1	44	32	11	38	50	51	48	43	0	0	208	71	137	1	0	24	48	27	0	0	0	53	19	29	38	35	2	17	13	2	7	15	0	0	0	0	10	0	5	4	0	6	6	5	7	1	22
cluster_25	GIAGVGKT	1	2	1	0	2	1	1	3	1	0	0	0	0	0	0	0	0	0	3	0	0	0	0	0	0	0	0	0	0	0	0	0	0	0	0	0	0	0	0	0	0	0	0	0	0	0	0	0
cluster_26	GIAGVGKT	1	0	0	0	0	0	0	0	0	0	0	0	0	0	0	0	0	0	0	0	0	0	0	0	0	0	0	0	0	0	0	0	0	0	0	0	0	0	0	0	0	0	0	0	0	0	0	0
cluster_28	GVAGIGKS	2	0	0	0	0	0	0	0	0	0	0	0	0	0	0	0	0	0	0	0	0	0	0	0	0	0	0	0	0	0	0	0	0	0	0	0	0	0	0	0	0	0	0	0	0	0	0	0
cluster_29	GVAGIGKS	2	0	0	0	0	0	0	0	0	0	0	0	0	0	0	0	0	0	0	0	0	0	0	0	0	0	0	0	0	0	0	0	0	0	0	0	0	0	0	0	0	0	0	0	0	0	0	0
cluster_31	GVAGIGKS	2	2	7	4	8	6	8	7	6	3	4	0	0	0	0	0	0	1	1	0	0	0	1	0	0	0	0	1	0	0	0	1	0	0	0	0	0	6	1	0	3	0	0	0	1	0	0	0
cluster_33	GVAGIGKS	2	0	0	0	0	0	0	0	0	0	0	0	0	0	0	0	0	0	0	0	0	0	0	0	0	0	0	0	0	0	0	0	0	0	0	0	0	0	0	0	0	0	0	0	0	0	0	0
cluster_34	GVAGIGKS	2	5	0	0	4	0	0	0	5	4	0	0	0	2	0	0	0	0	0	7	0	0	0	0	3	0	0	0	0	0	1	0	0	0	0	0	0	1	0	0	0	3	1	0	0	2	0	1
cluster_35	GVAGIGKS	2	14	7	3	5	37	30	16	25	0	9	7	5	1	2	0	0	1	10	3	0	4	3	10	16	2	4	0	1	0	0	3	5	2	0	2	11	1	1	2	0	4	2	0	0	1	1	3
cluster_36	GVAGIGKS	2	0	0	0	0	0	0	1	1	0	0	2	13	1	3	0	7	0	2	0	0	0	0	0	0	0	0	0	0	0	0	0	0	0	0	0	0	1	0	0	0	0	0	0	0	0	0	2
cluster_37	GVAGIGKS	2	8	9	3	7	20	19	19	21	0	1	0	0	0	0	0	0	0	0	0	0	0	1	0	0	0	0	0	0	0	0	0	0	6	0	0	0	2	0	0	0	6	0	0	2	0	0	1
cluster_38	GVAGIGKS	2	0	0	0	0	0	0	0	0	0	0	0	0	0	0	0	0	0	0	0	0	0	0	0	0	0	0	0	0	0	0	0	0	0	0	0	0	0	0	0	0	0	0	0	0	0	0	0
cluster_39	GVAGIGKS	2	20	12	0	0	36	37	24	24	0	0	0	0	41	0	0	0	0	0	0	0	0	1	0	0	2	0	0	0	0	0	0	23	0	0	18	0	13	0	0	0	0	0	0	0	0	0	0
cluster_40	GVAGIGKS	2	8	7	0	7	11	18	6	4	0	1	2	0	0	0	0	0	0	0	0	0	0	0	1	0	0	0	0	0	0	0	0	0	0	0	0	0	0	0	0	0	0	1	0	0	0	0	0
cluster_41	GVAGIGKS	2	26	12	11	20	41	30	35	33	0	3	0	1	1	0	0	4	0	0	1	0	0	0	0	0	4	4	0	1	0	0	0	0	0	0	0	0	0	0	0	0	0	0	0	0	0	0	4
cluster_42	GVAGIGKS	2	37	19	0	22	49	42	36	34	0	0	0	22	0	24	0	0	17	9	0	0	0	0	5	0	0	0	0	5	0	4	0	0	0	0	0	0	0	0	0	0	0	0	0	0	0	0	0
cluster_43	GVAGIGKS	2	35	23	24	19	41	51	39	40	1	0	0	0	0	0	14	0	0	0	0	0	19	7	0	15	8	9	0	0	0	0	0	0	2	0	0	0	0	0	0	0	0	0	0	0	0	0	0
cluster_44	GVAGIGKS	2	13	8	5	9	8	22	21	20	1	0	0	0	0	0	1	0	2	1	0	0	0	1	0	0	0	0	0	1	1	0	0	0	0	0	0	0	0	0	0	0	0	0	0	0	0	0	0
cluster_46	GVAGIGKS	2	0	0	0	0	0	0	0	0	0	0	0	0	0	0	0	0	0	0	0	0	0	0	0	0	0	0	0	0	0	0	0	0	0	0	0	0	0	0	0	0	0	0	0	0	0	0	0
cluster_48	GVAGIGKS	2	18	10	3	18	22	25	18	15	0	0	0	0	0	0	0	0	0	0	0	0	0	0	0	0	0	0	0	0	0	0	0	0	0	0	0	0	0	1	0	0	0	0	0	0	0	0	3
cluster_49	GVAGIGKS	2	0	0	0	0	0	0	0	0	0	0	0	0	0	0	0	0	0	0	0	0	0	0	0	0	0	0	0	0	0	0	0	0	0	0	0	0	0	0	0	0	0	0	0	0	0	0	0
cluster_51	GVAGIGKS	2	0	0	0	0	0	0	0	0	0	0	0	0	0	0	0	0	0	1	0	0	1	0	0	0	0	0	0	0	0	0	0	0	0	0	0	0	0	0	0	0	0	0	0	0	0	0	0
cluster_52	GVAGIGKS	2	24	10	7	24	37	20	23	28	0	0	0	0	0	0	0	0	0	6	0	1	0	4	0	0	0	0	0	0	0	0	0	0	0	0	0	0	0	0	0	0	0	0	0	0	4	0	0
cluster_53	GVAGIGKS	2	0	0	0	0	0	0	0	0	0	0	0	0	0	0	0	0	0	0	0	0	0	0	0	0	0	0	0	0	0	0	0	0	0	0	0	0	0	0	0	0	0	0	0	0	0	0	0
cluster_54	GVAGIGKS	2	27	14	0	25	37	28	32	42	3	0	0	0	3	5	8	0	5	8	0	2	7	3	2	0	7	10	0	0	2	0	0	0	0	0	0	0	0	0	0	0	0	0	0	0	1	0	0
cluster_55	GVAGIGKS	2	0	0	0	0	0	0	0	0	0	0	0	0	0	0	0	0	0	0	0	0	0	0	0	0	0	0	0	0	0	0	0	0	0	0	0	0	0	0	0	0	0	0	0	0	0	0	0
cluster_56	GVAGIGKS	2	0	0	0	0	0	0	0	0	0	0	0	0	0	0	0	0	0	0	0	0	0	0	0	0	0	0	0	0	0	0	0	0	0	0	0	0	0	0	0	0	0	0	0	0	0	0	0
cluster_57	GVAGIGKS	2	28	21	15	27	41	33	37	34	0	0	0	0	0	0	0	0	0	0	0	0	0	0	0	0	0	0	0	0	0	0	0	0	0	0	0	0	0	0	0	0	0	0	0	2	0	0	0
cluster_58	GVAGIGKS	2	0	0	0	0	0	0	0	0	0	0	0	0	0	0	0	0	0	0	0	0	0	0	0	0	0	0	0	0	0	0	0	0	0	0	0	0	0	0	0	0	0	0	0	0	0	0	0
cluster_59	GVAGIGKS	2	2	3	1	4	4	3	13	4	0	0	0	0	0	0	0	0	0	0	0	0	0	0	0	0	0	0	0	0	0	0	0	0	0	0	0	0	0	0	0	0	0	0	0	0	0	0	0
cluster_60	GVAGIGKS	2	13	7	0	5	14	16	9	8	0	1	0	11	0	5	3	0	1	4	0	0	0	0	0	0	0	0	0	1	0	0	0	0	0	0	0	0	0	0	1	0	2	0	0	0	0	0	0
cluster_61	GVAGIGKS	2	35	10	6	16	26	37	27	25	0	10	0	0	0	0	0	5	7	0	0	0	0	0	5	0	0	0	0	0	0	0	0	0	0	0	0	0	0	0	0	0	0	0	0	0	0	0	0
cluster_62	GVAGIGKS	2	16	10	11	13	21	34	27	20	0	5	0	0	6	0	2	5	0	0	0	0	8	0	0	0	12	16	0	0	7	4	0	7	2	4	0	0	0	0	0	0	0	1	0	1	4	0	5
cluster_63	GVAGIGKS	2	11	4	6	9	20	14	14	12	0	0	11	18	0	9	0	11	0	0	0	0	0	0	0	0	0	0	0	0	0	0	0	0	0	0	0	0	0	0	0	0	0	0	0	0	0	0	0
cluster_65	GVAGIGKS	2	0	0	0	0	0	0	0	0	0	0	0	0	0	0	0	0	0	0	0	0	0	0	0	0	0	0	0	0	0	0	0	0	0	0	0	0	0	0	0	0	0	0	0	0	0	0	0
cluster_66	GVAGIGKS	2	9	4	0	6	14	8	8	8	0	0	13	0	9	1	0	0	0	0	0	0	0	0	0	0	0	1	0	0	0	1	0	0	0	0	1	0	0	0	0	0	3	1	0	0	0	0	2
cluster_67	GVAGIGKS	2	0	0	0	0	0	0	0	0	0	0	0	0	0	0	0	0	0	0	0	0	0	0	0	0	0	0	0	0	0	0	0	0	0	0	0	0	0	0	0	0	0	0	0	0	0	0	0
cluster_68	GVAGIGKS	2	1	1	3	2	0	0	0	2	0	0	0	0	0	0	0	0	0	0	0	0	0	0	0	0	0	0	0	0	0	0	0	0	0	0	1	0	0	0	0	0	0	0	0	0	0	0	0
cluster_69	GVAGIGKS	2	0	0	0	0	0	0	0	0	0	0	0	0	0	0	0	0	0	0	0	0	0	0	0	0	0	0	0	0	0	0	0	0	0	0	0	0	0	0	0	0	0	0	0	0	0	0	0
cluster_71	GVAGIGKS	2	3	5	0	0	21	29	10	11	0	0	0	1	0	0	0	0	0	0	0	0	0	1	0	0	0	0	0	0	0	0	0	0	0	0	0	0	0	0	0	0	0	0	0	0	0	0	0
cluster_72	GVAGIGKS	2	4	1	0	0	8	9	4	7	0	0	0	0	0	0	0	0	0	1	0	0	0	0	0	1	0	0	0	0	1	0	0	0	0	0	0	2	0	0	0	0	0	0	0	0	0	0	1
cluster_73	GVAGIGKS	2	0	0	0	0	0	0	0	0	0	0	0	0	0	0	0	0	0	0	0	0	0	0	0	0	0	0	0	0	0	0	0	0	0	0	0	0	0	0	0	0	0	0	0	0	0	0	0
cluster_74	GVAGIGKS	2	33	21	0	28	39	30	41	43	28	0	0	0	0	0	0	0	0	0	0	0	0	0	0	0	0	0	0	0	0	0	0	0	0	0	0	0	0	0	0	0	0	0	0	0	0	0	1
cluster_75	GVAGIGKS	2	0	0	0	0	0	0	0	0	0	0	0	0	0	0	0	0	0	0	0	0	0	0	0	0	0	0	0	0	0	0	0	0	0	0	0	0	0	0	0	0	0	0	0	0	0	0	0
cluster_76	GVAGIGKS	2	0	0	0	0	0	0	0	0	0	9	1	0	0	0	0	0	0	0	8	0	0	0	0	0	0	0	0	0	0	0	0	0	0	0	0	0	1	1	0	0	1	0	0	0	0	0	0
cluster_77	GVAGIGKS	2	0	0	0	0	0	0	0	0	0	0	0	0	0	0	0	0	0	0	0	0	0	0	0	0	0	0	0	0	0	0	0	0	0	0	0	0	0	0	0	0	0	0	0	0	0	0	0
cluster_78	GVAGIGKS	2	25	19	0	29	41	38	37	41	0	0	0	0	0	0	0	0	0	0	0	1	0	0	0	0	0	0	0	0	0	0	0	0	0	0	0	0	0	0	0	0	0	7	0	0	0	0	0
cluster_79	GVAGIGKS	2	23	0	26	0	0	0	0	0	0	0	1	0	0	0	0	0	1	0	0	0	0	0	0	0	0	0	0	0	0	0	0	0	0	0	0	0	0	0	0	0	9	0	0	0	0	0	16
cluster_80	GVAGIGKS	2	0	0	0	0	0	0	0	0	0	0	0	0	0	0	0	0	0	0	0	0	0	0	0	0	0	0	0	0	0	0	0	0	0	0	0	0	0	0	0	0	0	0	0	0	0	0	0
cluster_83	GIAGIGKT	3	0	0	0	0	0	0	0	0	0	0	0	0	0	0	0	0	0	0	0	0	0	0	0	0	0	0	0	0	0	0	0	0	0	0	0	0	0	0	0	0	0	0	0	0	0	0	0
cluster_84	GIAGIGKT	3	8	2	1	3	3	3	8	8	0	0	0	2	0	0	1	0	0	0	0	1	0	0	0	0	0	0	0	0	0	0	0	0	0	0	0	0	0	0	0	0	0	0	0	0	0	0	0
cluster_85	GIAGIGKT	3	4	5	3	3	9	7	3	7	0	3	0	1	1	0	1	0	0	0	0	0	0	0	1	0	0	2	0	1	6	2	1	1	0	2	1	23	0	0	2	1	1	0	0	0	2	0	0
cluster_86	GIAGIGKT	3	6	6	8	15	7	19	4	9	0	0	0	0	0	0	0	0	0	0	0	0	0	0	0	0	0	0	0	0	0	0	0	0	2	0	0	0	0	0	0	2	6	0	0	0	0	0	0
cluster_87	GIAGIGKT	3	0	0	0	0	0	0	0	0	0	0	0	0	0	0	0	0	0	0	0	0	0	0	0	0	0	0	0	0	0	0	0	0	0	0	0	0	0	0	0	0	0	0	0	0	0	0	0
cluster_89	GIAGIGKT	3	0	0	0	0	0	0	0	0	0	0	0	0	0	0	0	0	0	0	0	0	0	0	0	0	0	0	0	0	0	0	0	0	0	0	0	0	0	0	0	0	0	0	0	0	0	0	0
cluster_90	GIAGIGKT	3	0	0	0	0	0	0	0	0	0	0	0	0	0	0	0	0	0	0	0	0	0	0	0	0	0	0	0	0	0	0	0	0	0	0	0	0	0	0	0	0	0	0	0	0	0	0	0
cluster_91	GIAGIGKT	3	3	3	0	8	10	10	5	5	0	0	0	0	0	0	0	0	0	0	0	0	0	0	0	4	0	0	0	0	0	0	0	0	0	0	0	0	0	0	0	0	0	0	0	0	0	0	0
cluster_92	GIAGIGKT	3	6	3	2	16	17	22	10	14	3	0	0	0	0	0	0	0	0	0	0	0	0	0	0	0	0	0	0	0	0	0	0	0	0	0	0	0	0	0	0	0	0	0	0	0	0	0	0
cluster_93	GIAGIGKT	3	30	17	23	20	34	36	33	31	7	19	5	17	8	12	17	2	7	10	5	0	6	13	11	11	25	15	0	4	13	22	9	6	10	0	8	93	10	4	3	7	11	16	10	6	4	2	14
cluster_95	GIAGIGKT	3	30	15	0	34	36	21	24	37	0	0	0	41	0	39	0	0	0	0	0	0	0	19	0	0	0	0	0	0	0	0	0	0	0	0	0	0	0	0	0	0	0	0	0	0	0	0	0
cluster_96	GIAGIGKT	3	19	9	0	9	23	21	17	19	0	0	0	0	0	0	0	0	0	0	0	0	0	0	0	0	0	0	0	0	0	0	3	0	0	0	0	0	0	0	0	0	0	0	0	0	0	0	0
cluster_97	GIAGIGKT	3	0	0	0	0	0	0	0	0	0	5	0	6	0	0	0	3	2	6	0	0	1	0	0	1	0	0	0	0	0	0	0	0	0	0	0	0	0	0	0	0	0	0	0	0	0	0	0
cluster_98	GIAGIGKT	3	0	0	0	0	0	0	0	0	0	0	0	0	0	0	0	0	0	0	0	0	0	0	0	0	0	0	0	0	0	0	0	0	0	0	0	0	0	0	0	0	0	0	0	0	0	0	0
cluster_200	GIAGVGKT	1	0	1	0	0	0	2	2	0	0	0	0	0	0	0	0	0	0	0	0	0	0	0	0	0	0	0	0	0	0	0	1	0	0	1	0	1	0	0	0	0	0	0	0	0	0	0	0
cluster_208	GIAGVGKT	1	1	1	0	0	2	0	0	1	0	0	0	0	0	0	0	0	0	0	0	0	0	0	0	0	0	0	0	0	0	0	0	0	0	0	0	0	0	0	0	0	0	0	0	0	0	0	0
cluster_220	GVAGIGKS	2	0	1	0	3	1	0	1	0	0	0	0	0	0	0	0	0	0	0	0	0	0	0	0	0	0	0	0	0	0	0	0	0	0	0	0	0	0	0	0	0	0	0	0	0	0	0	0
cluster_223	GVAGIGKS	2	10	3	5	11	0	0	0	24	0	0	0	40	0	1	0	0	0	0	0	0	0	0	0	0	0	0	0	0	0	0	0	0	0	0	0	0	0	0	0	0	0	0	0	0	0	0	0
cluster_225	GVAGIGKS	2	30	26	10	23	24	27	24	33	0	0	2	0	4	0	0	0	1	1	1	0	3	0	0	0	8	18	0	6	6	5	0	0	0	1	3	52	4	0	0	0	8	3	0	9	2	0	8
cluster_227	GVAGIGKS	2	0	0	0	0	0	0	0	0	0	0	0	0	0	0	0	0	0	0	0	0	0	0	0	0	0	0	0	0	0	0	0	0	0	0	0	0	0	0	0	0	0	0	0	0	0	0	0
cluster_231	GVAGIGKS	2	10	6	2	7	16	11	12	11	0	0	0	0	0	0	0	0	0	0	0	0	0	0	0	0	0	0	0	0	0	0	1	0	0	0	0	0	0	0	0	0	0	0	0	0	1	0	0
cluster_235	GVAGIGKS	2	21	12	4	27	28	25	32	20	0	0	0	0	0	0	7	5	0	0	0	0	0	0	0	0	0	0	0	0	0	0	0	0	0	0	0	0	0	0	0	0	0	0	1	0	0	0	1
cluster_236	GVAGIGKS	2	0	0	0	0	0	0	0	0	0	0	0	0	0	0	0	0	0	0	0	0	0	0	0	0	0	0	0	0	0	0	0	0	0	0	0	0	0	0	0	0	0	0	0	0	0	0	0
cluster_237	GVAGIGKS	2	0	1	0	0	0	0	0	0	0	0	2	0	0	0	0	0	0	0	0	0	0	0	0	0	0	0	0	0	0	0	0	0	0	0	0	0	0	0	0	0	0	0	0	0	0	0	0
cluster_241	GVAGIGKS	2	16	27	0	18	38	36	35	28	0	22	68	29	12	1	0	14	22	6	0	1	1	3	4	0	15	11	0	0	0	0	0	0	1	0	2	25	3	0	0	4	0	2	3	2	0	0	10
cluster_243	GVAGIGKS	2	0	0	0	0	0	0	0	0	0	0	0	0	0	0	0	0	0	0	0	0	0	0	0	0	0	0	0	0	0	0	0	0	0	0	0	0	0	0	0	0	0	0	0	0	0	0	0
cluster_245	GVAGIGKS	2	0	1	2	0	0	0	0	0	0	0	0	0	0	0	0	0	0	0	0	0	1	0	0	0	0	0	0	0	0	0	0	0	0	0	0	0	0	0	0	0	0	0	0	0	0	0	0
cluster_248	GVAGIGKS	2	6	5	1	3	17	11	1	15	0	0	0	0	0	0	0	0	0	0	1	0	0	0	0	0	0	0	0	0	0	0	0	0	0	0	0	0	0	0	0	0	0	0	0	0	0	0	0
cluster_250	GVAGIGKS	2	15	2	6	14	38	36	26	36	0	0	0	0	0	0	0	0	0	0	0	0	0	0	0	0	0	0	0	0	0	0	1	0	0	0	0	0	0	0	0	0	0	0	0	0	0	0	0
cluster_254	GVAGIGKS	2	0	0	0	0	0	0	0	0	0	0	0	0	0	0	0	0	0	0	0	0	0	0	0	0	0	0	0	0	0	0	0	0	0	0	0	0	0	0	0	0	0	0	0	0	0	0	0
cluster_255	GVAGIGKS	2	0	0	0	0	0	0	0	0	0	0	0	0	0	0	0	0	0	0	0	0	0	0	0	0	0	0	0	0	0	0	0	0	0	0	0	0	0	0	0	0	0	0	0	0	0	0	0
cluster_259	GVAGIGKS	2	2	0	3	2	2	6	2	3	1	2	0	0	1	1	1	0	0	0	0	0	0	0	0	3	0	2	0	0	0	0	0	0	0	0	0	11	1	1	1	2	0	1	1	1	0	0	0
cluster_262	GVAGIGKS	2	0	0	0	0	0	0	0	0	0	0	0	0	0	0	0	0	0	0	0	0	0	0	0	0	0	0	0	0	0	0	0	0	0	0	0	0	0	0	0	0	0	0	0	0	0	0	0
cluster_263	GVAGIGKS	2	25	25	17	26	54	54	35	39	0	0	0	0	0	0	0	0	0	0	0	0	0	0	0	0	0	0	0	0	0	0	0	0	0	0	0	0	0	0	0	0	0	0	0	0	0	0	0
cluster_264	GVAGIGKS	2	0	0	0	0	0	0	0	0	0	0	0	0	0	0	0	0	0	0	0	0	0	0	0	0	0	0	0	0	0	0	0	0	0	0	0	0	0	0	0	0	0	0	0	0	0	0	0
cluster_268	GIAGIGKT	3	0	0	0	0	0	0	0	0	0	0	0	0	0	0	0	0	0	0	0	0	0	0	0	0	0	0	0	0	0	0	0	0	0	0	0	0	0	0	0	0	0	0	0	0	0	0	0
cluster_281	GIAGIGKT	3	0	0	0	0	0	0	0	0	0	0	0	0	0	0	0	0	0	0	0	0	0	0	0	0	0	0	0	0	0	0	0	0	0	0	0	0	0	0	0	0	0	0	0	0	0	0	0
cluster_282	GIAGIGKT	3	0	0	0	0	0	0	0	0	0	0	0	0	0	0	0	0	0	0	0	0	0	0	0	0	0	0	0	0	0	0	0	0	0	0	0	0	0	0	0	0	0	0	0	0	0	0	0
cluster_283	GIAGIGKT	3	0	17	7	9	13	17	7	5	0	0	0	0	0	0	0	0	0	0	0	0	0	0	0	0	0	0	0	2	5	2	10	3	5	3	5	75	3	5	0	0	5	4	0	2	1	0	6
cluster_285	GIAGIGKT	3	10	10	4	15	19	19	9	21	0	0	0	0	0	0	0	0	0	0	0	0	0	7	0	0	0	0	0	0	0	0	0	0	0	0	1	0	0	0	0	0	0	0	0	0	0	0	12
cluster_288	GIAGIGKT	3	0	0	0	0	0	0	0	0	0	17	0	0	10	0	0	0	0	0	0	0	0	0	0	0	0	0	0	0	0	0	0	0	0	0	0	0	0	0	0	0	0	0	0	0	0	1	4
cluster_293	GIAGIGKT	3	4	8	0	5	10	6	7	11	0	0	0	0	0	0	0	0	0	0	0	0	0	0	0	0	0	0	0	0	0	0	0	0	0	0	0	0	0	0	0	0	0	0	0	0	0	0	0
cluster_298	GIAGIGKT	3	60	42	17	45	66	63	46	55	0	1	0	0	3	0	0	9	0	0	0	0	7	2	0	0	0	0	0	0	1	1	0	6	0	0	10	0	0	1	4	0	10	8	0	0	0	0	0
cluster_312	GIAGIGKT	3	0	0	0	0	0	0	0	0	0	0	0	0	0	0	0	0	0	0	0	0	0	0	0	0	0	0	0	0	0	0	0	0	0	0	0	0	0	0	0	0	0	0	0	0	0	0	0
cluster_318	GIAGIGKT	3	3	1	3	7	3	3	4	4	0	4	4	0	5	0	0	0	0	6	0	0	1	2	0	17	0	0	0	0	0	0	0	0	0	0	0	0	0	0	0	0	2	1	0	0	0	0	2
cluster_332	GIAGIGKT	3	0	0	0	0	0	0	0	0	0	0	0	0	0	0	0	1	0	0	0	0	0	0	0	0	0	0	0	0	0	1	1	1	0	0	3	0	1	0	0	0	0	0	0	2	0	0	3
cluster_334	GIAGIGKT	3	0	0	0	0	0	0	0	0	0	0	0	0	0	0	0	0	0	0	0	0	0	0	0	0	0	0	0	0	0	0	0	0	0	0	0	0	0	0	0	0	0	0	0	0	0	0	0
cluster_335	GIAGIGKT	3	0	0	0	0	0	0	0	0	0	0	0	0	0	0	0	0	0	0	0	0	0	0	0	0	0	0	0	0	0	0	0	0	0	0	0	0	0	0	0	0	0	0	0	0	0	0	0
cluster_337	GIAGIGKT	3	8	13	8	0	15	0	6	9	0	0	0	0	0	0	0	0	0	0	0	0	0	0	0	0	0	0	0	0	0	0	0	0	0	0	0	0	0	0	0	0	0	0	0	0	0	0	0
cluster_338	GIAGIGKT	3	0	20	15	5	0	0	0	0	0	0	0	0	0	0	0	0	0	0	2	0	0	0	0	0	0	0	0	0	0	0	0	0	0	0	0	0	0	0	0	0	0	0	0	0	0	0	0
cluster_339	GVAGIGKT	4	8	13	3	13	18	26	10	10	0	0	0	0	0	0	0	0	0	0	0	0	0	0	0	0	0	0	0	0	0	0	0	0	0	0	0	0	0	0	0	0	0	0	0	0	0	0	0
cluster_341	GVAGIGKT	4	0	2	2	2	7	0	8	11	0	0	0	0	0	0	0	0	0	0	0	0	0	0	0	0	0	0	0	0	0	0	0	0	0	0	0	0	0	0	0	0	0	0	0	0	0	0	0
cluster_343	GVAGIGKT	4	0	1	0	0	0	0	3	5	0	0	0	0	0	0	0	0	0	0	0	0	0	0	0	0	0	0	0	0	0	0	0	0	0	0	0	0	0	0	0	0	0	0	0	0	0	0	0
cluster_344	GVAGIGKT	4	0	0	0	0	0	0	0	0	0	0	0	0	0	0	0	0	0	0	0	0	0	0	0	0	0	0	0	0	0	0	0	0	0	0	0	0	0	0	0	0	0	0	0	0	0	0	0
cluster_346	GVAGIGKT	4	0	0	0	0	0	0	0	0	0	0	0	0	0	0	0	0	0	0	0	0	0	0	0	0	0	0	0	0	0	0	0	0	0	0	0	0	0	0	0	0	0	0	0	0	0	0	0
cluster_348	GVAGIGKT	4	0	0	0	0	0	0	0	0	0	0	0	0	0	0	0	0	0	0	0	0	0	0	0	0	0	0	0	0	0	0	0	0	0	0	0	0	0	0	0	0	0	0	0	0	0	0	0
cluster_350	GVAGIGKT	4	0	2	0	0	2	3	0	0	0	0	0	0	0	0	0	0	0	0	0	0	0	0	0	0	0	0	0	0	0	0	0	0	0	0	0	0	0	0	0	0	0	0	0	0	0	0	0
cluster_353	GVAGIGKT	4	1	3	1	2	1	1	0	1	0	0	0	0	0	0	0	0	0	0	0	0	0	0	0	0	0	0	0	1	2	2	0	1	0	2	2	16	0	1	1	0	4	0	1	3	1	1	1
cluster_354	GVAGIGKT	4	0	0	0	0	0	0	0	0	0	0	0	0	0	0	0	0	0	0	0	0	0	0	0	0	0	0	0	0	0	0	0	0	0	0	0	0	0	0	0	0	0	0	0	0	0	0	0
cluster_357	GVAGIGKT	4	8	2	0	0	17	18	8	12	1	0	0	0	0	0	0	0	0	0	0	0	0	0	0	0	0	0	0	0	0	0	0	0	0	0	0	0	0	0	0	0	0	0	0	0	0	0	0
cluster_363	GIAGVGKT	1	0	0	0	0	0	0	0	0	5	2	1	0	0	0	5	1	3	0	0	0	0	0	0	0	0	0	0	0	0	0	0	0	0	0	0	0	0	0	0	0	0	0	0	0	0	0	0
cluster_369	GIAGVGKT	1	0	0	0	0	0	0	0	0	0	0	0	0	0	0	0	0	0	0	0	0	0	0	0	0	0	0	0	0	0	0	0	0	0	0	0	0	0	0	0	0	0	0	0	0	0	0	0
cluster_370	GIAGVGKT	1	0	0	0	0	0	0	0	0	0	0	0	0	0	0	0	0	0	0	0	0	0	0	0	0	0	0	0	0	0	0	0	0	0	0	0	0	0	0	0	0	0	0	0	0	0	0	0
cluster_371	GIAGVGKT	1	0	1	4	0	1	2	0	0	0	0	1	0	3	2	0	0	0	0	2	0	1	1	0	0	0	0	0	0	0	0	1	0	0	0	0	0	0	0	0	0	0	0	0	0	0	0	0
cluster_372	GIAGVGKT	1	11	6	12	18	28	48	18	29	4	4	12	6	3	0	0	1	0	0	1	0	3	3	0	6	2	3	0	0	0	0	0	0	0	0	0	0	0	0	0	0	0	0	0	1	0	0	0
cluster_373	GIAGVGKT	1	0	0	0	0	0	0	0	0	0	0	0	0	0	0	0	0	0	0	0	0	0	0	0	0	0	0	0	0	0	0	0	0	0	0	0	0	0	0	0	0	0	0	0	0	0	0	0
cluster_379	GIAGVGKT	1	0	0	0	0	0	0	0	0	0	0	0	0	0	0	0	0	0	0	0	0	0	0	0	0	0	0	0	0	0	0	0	0	0	0	0	0	0	0	0	0	0	0	0	0	0	0	0
cluster_380	GIAGVGKT	1	0	0	0	0	0	0	0	0	1	3	14	0	0	0	0	0	14	0	0	0	6	0	0	0	0	0	0	0	0	0	0	0	1	0	0	0	0	0	0	0	0	0	0	0	0	0	0
cluster_381	GIAGVGKT	1	2	3	4	5	2	3	8	3	1	0	0	0	0	0	0	0	0	0	0	0	0	0	0	0	0	0	0	0	2	0	0	1	0	1	0	1	0	0	2	0	0	0	0	0	0	0	0
cluster_386	GIAGVGKT	1	0	0	0	0	0	0	0	0	0	0	0	0	0	0	0	0	0	0	0	0	0	0	0	0	0	0	0	0	0	0	0	0	0	0	0	0	0	0	0	0	0	0	0	0	0	0	0
cluster_387	GVAGIGKS	2	0	0	0	0	0	0	0	0	0	0	0	0	0	0	0	0	0	0	0	0	0	0	0	0	0	0	0	0	0	1	0	0	0	0	0	10	0	1	1	0	1	0	0	0	0	0	0
cluster_389	GVAGIGKS	2	0	0	0	0	0	0	0	0	0	0	0	0	0	0	0	0	0	0	0	0	0	0	0	0	0	0	0	0	0	0	0	0	0	0	0	0	0	0	0	0	0	0	0	0	0	0	0
cluster_390	GVAGIGKS	2	0	0	0	0	0	0	0	0	0	0	0	0	0	0	0	0	0	0	0	0	0	0	0	0	0	0	0	0	0	0	0	0	0	0	0	0	0	0	0	0	0	0	0	0	0	0	0
cluster_394	GVAGIGKS	2	0	0	13	0	0	0	0	0	0	0	0	0	0	0	0	0	0	0	0	0	0	0	0	0	0	0	0	0	0	0	0	0	0	0	0	0	0	0	0	0	0	0	0	0	0	0	0
cluster_395	GVAGIGKS	2	0	0	0	0	0	0	0	0	0	0	0	0	0	0	0	0	0	0	0	0	0	0	0	0	0	0	0	0	0	0	0	0	0	0	0	0	0	0	0	0	0	0	0	0	0	0	0
cluster_396	GVAGIGKS	2	0	0	6	0	0	0	0	0	0	0	0	0	0	1	0	0	0	0	0	0	0	1	0	0	0	0	0	0	0	0	3	0	0	0	0	0	0	0	0	0	0	0	0	0	0	0	1
cluster_397	GVAGIGKS	2	0	0	17	0	0	0	0	0	0	0	0	0	0	0	0	0	0	1	0	0	1	0	0	1	0	0	0	0	0	0	0	0	0	0	0	0	0	0	0	0	0	0	0	0	0	0	0
cluster_398	GVAGIGKS	2	0	0	0	0	0	0	0	0	0	0	0	0	0	0	0	0	0	0	0	0	0	0	0	0	0	0	0	0	0	0	0	0	0	0	0	0	0	0	0	0	0	0	0	0	0	0	0
cluster_399	GVAGIGKS	2	0	0	9	0	0	0	13	0	0	0	0	0	0	0	0	0	0	0	0	0	0	0	0	0	0	0	0	0	0	0	7	0	0	0	0	0	0	0	0	0	9	0	4	0	0	0	0
cluster_400	GVAGIGKS	2	15	3	10	14	31	31	24	28	5	2	1	4	4	2	0	1	0	4	2	0	0	0	0	8	12	7	0	0	0	0	1	0	0	0	0	1	1	0	0	0	1	0	0	0	0	0	11
cluster_403	GVAGIGKS	2	0	0	11	0	0	0	0	0	0	0	1	19	0	18	0	0	0	0	0	0	0	8	8	0	0	0	0	0	0	0	0	0	0	0	0	0	0	0	0	0	0	0	0	0	0	0	0
cluster_404	GVAGIGKS	2	1	3	0	1	2	3	3	2	0	4	0	10	0	11	5	0	2	0	0	0	0	2	4	0	0	0	0	0	0	0	0	0	0	0	0	0	1	0	0	0	0	0	1	0	0	0	0
cluster_407	GVAGIGKS	2	0	0	4	0	0	1	5	0	0	0	0	0	0	0	2	0	0	0	0	0	0	0	0	0	0	0	0	0	4	0	0	0	0	0	0	0	0	0	0	0	0	0	0	0	0	0	0
cluster_411	GVAGIGKS	2	0	2	5	5	0	0	0	0	0	0	3	0	0	0	0	0	0	0	0	0	0	0	1	3	0	0	0	0	1	0	0	0	0	0	0	0	0	0	0	0	0	0	0	0	0	0	0
cluster_413	GVAGIGKS	2	0	3	7	15	0	0	0	0	0	3	0	12	1	5	0	0	1	0	3	0	0	1	0	0	8	12	0	0	0	0	0	0	1	0	2	0	2	0	0	0	0	0	0	0	0	0	2
cluster_418	GVAGIGKS	2	0	0	6	0	0	0	9	0	0	0	0	0	0	0	0	0	0	0	0	0	0	0	0	0	0	0	0	0	3	0	0	0	0	5	0	0	0	0	0	1	0	0	0	0	0	0	0
cluster_419	GVAGIGKS	2	0	0	20	0	0	0	0	0	0	0	0	0	0	0	0	0	0	0	0	0	0	0	0	0	0	0	0	0	0	0	0	0	0	0	0	0	0	0	0	0	0	0	0	0	0	0	0
cluster_420	GVAGIGKS	2	0	0	0	0	0	0	0	0	0	0	0	0	0	0	0	0	0	0	0	0	0	0	0	0	0	0	0	0	0	0	0	0	0	0	0	0	0	0	0	0	0	0	0	0	0	0	0
cluster_422	GVAGIGKS	2	0	0	5	0	0	0	0	0	0	0	27	0	0	1	0	1	11	19	0	0	0	0	0	0	0	0	0	0	0	0	0	0	0	0	0	0	0	0	0	0	0	0	0	0	0	0	0
cluster_423	GVAGIGKS	2	0	0	7	0	0	0	0	0	0	0	0	0	0	0	0	0	0	0	0	0	0	0	0	0	0	0	0	0	2	0	0	7	1	0	3	0	0	0	0	0	0	0	0	0	0	1	0
cluster_424	GVAGIGKS	2	1	1	4	0	11	12	8	6	0	9	14	14	0	0	0	14	8	0	0	0	0	9	5	7	11	8	0	0	5	0	0	0	0	0	0	13	0	1	0	0	2	0	0	0	0	2	5
cluster_426	GVAGIGKS	2	0	0	5	0	0	0	0	1	0	0	0	0	0	0	0	0	0	1	0	0	0	2	0	0	0	0	0	0	0	0	2	0	0	0	0	0	0	0	0	0	0	0	0	0	0	1	0
cluster_428	GVAGIGKS	2	0	0	14	0	0	0	0	0	0	3	12	0	2	4	0	0	16	0	0	0	0	1	0	0	0	0	1	1	0	0	3	7	0	4	0	3	0	0	0	1	10	3	0	1	0	0	1
cluster_429	GVAGIGKS	2	0	0	6	0	0	0	0	0	0	0	27	0	0	0	0	0	0	0	0	0	0	0	0	0	0	0	0	0	0	0	0	0	0	0	0	0	0	2	1	0	0	0	0	0	0	0	9
cluster_431	GVAGIGKS	2	0	0	10	0	0	0	0	0	0	0	0	0	0	0	0	0	0	0	0	0	0	0	0	0	0	0	0	0	0	0	0	0	0	0	0	0	0	0	0	0	0	0	0	0	0	0	0
cluster_432	GVAGIGKS	2	0	0	0	0	0	0	0	0	0	0	0	0	0	0	0	0	0	0	0	0	0	0	0	0	0	0	0	0	0	0	0	0	0	0	0	0	0	0	0	0	0	0	0	0	0	0	0
cluster_433	GVAGIGKS	2	0	0	17	0	0	0	12	0	0	0	0	0	0	0	0	0	0	0	0	0	0	14	0	0	0	0	0	0	0	0	0	0	0	0	0	0	0	0	0	0	0	0	0	0	0	0	0
cluster_434	GVAGIGKS	2	0	0	0	0	0	0	0	0	0	0	0	0	0	0	0	0	0	0	0	0	0	0	0	0	0	0	0	0	0	0	0	0	0	0	0	0	0	0	0	0	0	0	0	0	0	0	0
cluster_437	GVAGIGKS	2	0	0	5	0	0	0	0	0	0	5	0	0	0	0	12	0	2	0	1	0	7	0	0	11	0	0	0	0	0	0	0	0	0	0	0	0	1	0	0	0	0	1	0	0	1	0	0
cluster_438	GVAGIGKS	2	0	0	0	0	0	0	0	0	3	5	1	2	2	3	2	1	1	0	5	0	2	3	0	0	5	3	0	0	0	0	0	0	0	0	0	0	0	0	0	0	0	0	0	0	0	0	1
cluster_442	GVAGIGKS	2	0	0	0	0	0	0	0	0	0	0	0	0	0	0	0	0	0	0	0	0	0	0	0	0	0	0	0	0	0	0	0	0	0	0	0	0	0	0	0	0	0	0	0	0	0	0	0
cluster_449	GVAGIGKS	2	0	0	0	0	0	0	0	0	0	0	0	0	0	0	0	0	0	0	0	0	0	0	0	0	0	0	0	0	0	0	0	0	0	0	0	0	0	0	0	0	0	0	0	0	0	0	0
cluster_460	GIAGIGKT	3	0	0	0	0	0	0	0	0	0	0	0	0	0	0	0	0	0	1	0	0	1	0	0	0	0	0	0	0	0	0	0	0	0	0	0	0	0	0	0	0	0	0	0	0	0	0	0
cluster_464	GIAGIGKT	3	0	13	11	19	9	13	7	17	1	0	0	0	0	0	0	1	0	0	0	0	0	1	0	0	0	0	0	0	0	0	0	0	0	0	0	0	0	0	0	0	0	0	0	0	0	0	0
cluster_466	GIAGIGKT	3	0	3	1	0	5	1	5	2	0	0	0	0	0	0	0	0	0	0	0	0	0	1	0	0	0	0	0	0	0	0	0	0	0	0	0	2	0	0	0	0	0	0	0	0	0	0	0
cluster_469	GIAGIGKT	3	0	10	4	0	0	0	0	0	0	0	0	0	0	0	0	0	0	0	0	0	0	0	0	0	0	0	0	0	0	0	0	0	0	0	0	0	0	0	0	0	0	0	0	0	0	0	0
cluster_483	GIAGIGKT	3	9	11	4	10	15	16	15	21	21	5	17	0	6	1	9	5	15	11	1	0	0	3	2	0	0	0	0	0	2	1	0	1	1	0	3	1	0	0	1	0	1	0	0	3	1	1	2
cluster_486	GIAGIGKT	3	6	2	9	5	9	14	13	7	6	3	7	6	4	0	2	3	0	0	0	0	4	0	1	0	0	0	1	1	2	0	0	1	0	0	1	2	5	1	0	0	2	0	0	0	2	1	0
cluster_488	GIAGIGKT	3	1	0	1	0	0	0	0	1	0	2	2	0	0	1	0	2	0	0	0	0	0	0	0	0	1	0	0	0	0	0	0	0	0	0	0	0	0	0	0	0	0	0	0	0	0	0	1
cluster_493	GIAGIGKT	3	0	1	11	0	0	1	1	3	5	1	19	0	0	0	2	0	0	0	0	0	13	0	0	0	0	0	0	0	0	0	0	0	0	1	2	0	0	0	0	1	0	1	0	0	0	0	11
cluster_496	GIAGIGKT	3	0	0	1	0	0	0	0	0	0	3	0	0	1	0	0	0	1	0	0	0	0	2	0	0	0	4	0	1	0	1	3	0	1	0	0	12	0	0	0	0	0	0	0	0	0	1	3
cluster_510	GIAGIGKT	3	0	0	9	0	0	0	0	0	0	0	0	0	0	0	0	0	0	0	0	0	0	0	0	0	0	0	0	0	0	0	0	0	0	0	2	0	0	0	0	0	0	3	0	0	0	0	0
cluster_512	GIAGIGKT	3	0	0	2	1	0	0	0	0	0	0	0	0	14	16	0	6	6	7	10	1	0	3	0	3	0	0	0	0	0	0	0	0	0	0	0	0	0	0	0	0	0	0	0	0	0	0	1
cluster_517	GIAGIGKT	3	0	0	0	0	0	0	0	0	0	0	0	0	0	0	0	0	0	0	0	0	0	0	0	0	0	0	0	0	0	0	0	0	0	0	0	0	0	0	0	0	0	0	0	0	0	0	0
cluster_528	GIAGIGKT	3	0	0	4	0	4	3	1	1	0	0	1	0	0	0	0	0	0	0	0	0	0	0	0	0	0	0	0	0	0	0	0	0	0	0	0	0	0	0	0	0	0	0	0	0	0	0	2
cluster_534	GVAGIGKT	4	0	0	0	0	0	0	0	0	0	0	9	0	4	6	2	8	0	0	3	0	4	2	0	0	1	1	0	0	0	0	0	0	0	0	0	0	0	0	0	0	0	0	0	0	0	0	0
cluster_539	GVAGIGKT	4	0	0	0	0	0	0	0	0	2	1	2	1	0	1	1	1	0	1	1	0	0	2	0	3	0	2	0	0	0	0	0	0	0	0	0	0	0	0	0	0	0	0	0	0	0	0	0
cluster_541	GVAGIGKT	4	0	0	0	0	0	0	0	0	0	0	1	0	0	0	0	0	0	0	0	0	0	0	0	0	0	0	0	0	0	0	0	0	0	0	0	0	0	0	0	0	0	0	0	0	0	0	0
cluster_542	GVAGIGKT	4	0	0	1	0	0	0	0	0	0	0	0	0	0	0	0	0	0	0	0	0	0	0	0	0	0	0	0	0	0	0	0	0	0	0	0	0	0	0	0	0	0	0	0	0	0	0	0
cluster_544	GVAGIGKT	4	7	4	3	5	0	0	4	0	0	4	6	0	0	0	0	0	2	0	0	0	0	2	0	0	0	0	0	0	0	0	0	0	0	1	0	22	3	0	0	0	0	0	0	1	0	0	2
cluster_558	GIAGVGKT	1	0	0	1	1	2	1	0	2	11	11	10	10	16	7	4	6	3	12	5	0	2	11	0	1	9	7	0	0	0	0	0	1	0	0	1	1	0	2	1	0	1	0	0	0	0	0	7
cluster_561	GIAGVGKT	1	0	0	0	0	0	0	0	0	0	0	0	0	0	0	0	0	0	0	0	0	0	0	0	0	0	0	0	0	0	0	0	0	0	0	0	0	0	0	0	0	0	0	0	0	0	0	0
cluster_562	GIAGVGKT	1	1	0	0	1	0	1	1	0	1	0	0	1	1	0	0	0	0	1	0	0	0	0	0	0	0	0	0	0	0	0	0	0	0	0	0	0	0	0	0	0	0	0	0	0	0	0	0
cluster_564	GIAGVGKT	1	0	0	0	0	1	0	0	0	0	0	0	0	0	0	0	0	0	0	0	0	0	0	0	0	0	0	0	0	0	0	0	0	0	0	0	0	0	0	0	0	0	1	0	0	0	0	0
cluster_575	GIAGVGKT	1	15	6	0	17	22	0	22	17	0	0	0	0	0	0	0	0	0	0	0	0	0	0	0	0	0	0	0	0	0	0	0	0	2	0	0	1	0	0	0	0	0	0	0	0	0	0	0
cluster_576	GIAGVGKT	1	0	5	6	22	0	0	0	0	0	0	0	0	0	0	0	0	0	1	0	0	0	0	0	0	0	1	0	1	0	1	0	0	0	0	3	1	0	0	0	0	0	0	2	0	0	0	6
cluster_579	GIAGVGKT	1	14	12	5	22	29	31	30	28	0	0	0	0	0	0	0	25	0	0	17	2	0	8	0	0	0	0	2	1	0	0	0	0	3	2	1	40	0	0	0	0	5	6	9	12	0	0	0
cluster_580	GIAGVGKT	1	0	0	1	3	0	0	0	0	0	0	0	0	0	0	0	0	0	0	0	0	0	0	0	0	0	0	0	0	0	2	0	1	0	0	1	0	0	0	0	0	0	2	0	0	0	0	0
cluster_583	GIAGVGKT	1	0	0	0	0	0	0	0	0	0	0	0	0	0	0	0	0	0	0	0	0	0	0	0	0	0	0	0	0	0	0	0	0	0	0	0	0	0	0	0	0	0	0	0	0	0	0	0
cluster_587	GVAGIGKS	2	37	25	0	27	50	36	44	37	0	0	0	0	5	0	0	0	1	5	1	0	0	3	0	0	2	4	1	2	1	0	0	0	0	1	0	0	0	2	1	0	1	0	1	0	2	0	3
cluster_590	GVAGIGKS	2	1	0	0	0	3	1	2	0	0	0	0	0	0	0	0	0	0	0	0	0	0	0	0	0	0	0	0	0	0	0	0	0	0	1	0	1	0	0	0	0	1	1	0	0	0	0	0
cluster_591	GVAGIGKS	2	30	15	11	27	37	27	34	48	0	0	0	0	0	0	0	3	1	0	0	0	0	4	0	0	0	2	0	3	2	11	0	5	0	0	0	57	0	1	2	0	0	0	1	0	0	0	0
cluster_596	GVAGIGKS	2	0	2	1	2	0	0	0	0	0	0	0	0	0	0	0	0	0	0	0	0	0	0	0	0	0	0	0	0	0	0	0	0	0	0	0	0	0	0	0	0	0	0	0	0	0	0	0
cluster_600	GVAGIGKS	2	0	0	0	0	0	0	0	0	0	0	0	0	0	0	0	0	0	0	0	0	0	0	0	0	0	0	0	0	0	0	0	0	0	0	0	0	0	0	0	0	0	0	0	0	0	0	0
cluster_605	GVAGIGKS	2	6	16	0	11	26	26	13	13	12	0	0	0	0	0	0	0	0	0	0	0	0	0	0	0	5	7	0	0	0	0	0	0	1	0	0	1	0	0	1	0	0	0	0	0	0	0	5
cluster_608	GVAGIGKS	2	0	4	1	2	0	0	0	0	0	0	4	0	0	0	0	0	0	0	0	0	0	0	1	1	0	0	0	0	0	6	0	0	0	0	0	31	1	0	0	0	4	1	0	0	1	0	3
cluster_612	GVAGIGKS	2	8	0	2	10	9	5	8	7	2	0	0	0	0	0	0	0	0	0	5	0	1	0	0	1	0	1	0	0	0	0	0	0	0	2	0	0	0	1	0	0	0	0	0	0	0	0	0
cluster_617	GVAGIGKS	2	50	27	22	35	71	61	63	59	0	5	0	8	1	2	6	3	0	1	0	0	0	7	0	7	15	19	0	0	3	0	7	0	6	2	2	53	0	4	4	6	10	1	0	5	2	0	8
cluster_623	GVAGIGKS	2	25	18	4	25	25	30	29	34	0	0	0	0	0	0	0	0	0	0	0	0	0	0	0	0	0	0	0	0	0	0	0	0	0	0	0	0	0	0	0	0	0	0	0	0	0	0	0
cluster_627	GVAGIGKS	2	0	8	0	7	0	0	0	0	0	0	0	1	0	0	1	0	0	0	0	0	0	0	0	0	0	0	0	0	0	0	0	0	0	0	0	0	0	0	0	0	0	0	0	0	0	0	0
cluster_630	GVAGIGKS	2	0	2	1	3	0	0	0	0	1	0	1	0	0	1	2	0	0	0	13	0	1	0	0	0	0	0	0	0	0	0	0	0	0	0	0	0	0	0	0	0	0	0	0	0	0	0	0
cluster_632	GVAGIGKS	2	3	0	5	5	11	7	7	0	0	0	0	0	0	0	0	0	0	0	0	0	0	0	0	0	0	0	0	0	0	0	1	0	0	0	0	0	0	0	0	0	0	0	0	0	2	0	0
cluster_635	GVAGIGKS	2	15	20	0	18	25	29	30	35	0	0	0	26	0	15	0	36	0	0	0	0	9	0	0	0	0	0	0	0	0	0	2	0	0	0	0	0	0	0	0	0	0	0	0	0	0	0	0
cluster_651	GIAGIGKT	3	6	11	6	16	18	27	8	5	0	0	0	0	0	0	0	0	0	0	0	0	0	0	0	0	0	0	0	0	0	0	0	0	0	0	0	12	0	0	0	1	0	0	1	0	0	0	0
cluster_652	GIAGIGKT	3	5	4	4	12	16	25	3	8	0	0	1	0	0	0	0	0	0	0	0	0	0	0	0	0	0	0	0	0	3	0	0	0	0	0	0	80	0	0	0	0	0	0	3	0	6	0	0
cluster_656	GIAGIGKT	3	29	9	11	17	43	26	43	32	2	0	0	2	0	0	0	0	0	0	0	0	0	0	0	0	3	4	0	0	0	0	0	1	0	0	0	0	0	1	0	0	0	0	0	0	0	0	0
cluster_661	GIAGIGKT	3	6	6	1	8	12	13	13	16	0	0	1	0	0	0	0	0	1	0	1	0	0	0	0	0	0	0	0	0	3	0	0	0	0	0	0	2	0	0	0	0	0	0	0	0	0	0	0
cluster_666	GIAGIGKT	3	0	0	0	0	0	0	0	0	0	0	0	0	0	0	0	0	0	0	0	0	0	0	0	0	0	0	0	0	0	0	0	1	0	0	0	0	0	0	0	0	0	0	0	0	0	0	4
cluster_673	GIAGIGKT	3	0	0	0	0	0	0	0	0	0	0	0	0	0	0	0	0	0	0	0	0	0	0	0	0	0	0	0	0	0	0	0	0	0	0	0	0	0	0	0	0	0	0	0	0	0	0	0
cluster_681	GIAGIGKT	3	16	11	3	17	19	26	33	26	15	0	0	0	0	0	0	8	6	1	6	0	9	1	0	0	2	0	0	0	0	0	0	0	0	0	0	0	0	0	0	0	0	0	0	0	1	0	6
cluster_684	GIAGIGKT	3	12	10	0	14	29	13	20	22	0	0	0	0	0	0	0	0	0	0	0	0	0	0	0	0	0	0	0	0	0	0	0	0	0	0	0	0	0	0	0	0	0	0	0	0	0	0	0
cluster_686	GIAGIGKT	3	0	0	0	0	0	0	0	0	0	0	5	0	3	0	0	0	2	3	0	0	0	4	0	1	0	0	0	0	0	0	0	0	0	0	0	0	0	0	0	0	0	0	0	0	0	0	0
cluster_687	GIAGIGKT	3	4	0	0	4	1	2	1	0	0	0	0	0	0	0	0	0	0	0	0	0	0	0	0	0	0	0	0	0	0	0	0	0	0	0	0	0	0	0	0	0	0	0	0	0	0	0	0
cluster_691	GIAGIGKT	3	23	14	4	22	25	27	26	29	0	8	0	0	3	0	0	10	0	0	0	0	0	0	0	0	0	0	0	1	1	0	10	10	0	0	0	0	5	0	0	5	0	0	0	0	3	0	4
cluster_694	GIAGIGKT	3	1	4	1	5	3	6	4	7	0	0	0	0	0	0	0	0	0	0	0	0	0	0	0	0	0	0	0	0	0	0	0	0	0	0	0	0	0	0	0	0	0	0	0	0	0	0	0
cluster_698	GIAGIGKT	3	19	12	4	28	27	26	21	24	0	0	0	0	0	0	0	0	0	0	0	0	0	1	0	0	0	0	0	7	14	2	4	7	5	3	9	78	11	7	6	6	20	3	2	8	8	2	7
cluster_717	GIAGIGKT	3	0	0	0	0	0	0	0	0	0	0	0	0	0	0	0	0	0	0	0	0	0	0	0	0	0	0	0	0	0	0	0	0	0	0	0	0	0	0	0	0	0	0	0	0	0	0	0
cluster_723	GIAGIGKT	3	0	0	0	0	0	0	0	0	1	4	0	2	2	2	2	0	3	1	3	0	0	0	0	1	0	0	0	0	0	0	0	0	0	0	0	0	0	0	0	0	0	0	0	0	0	0	0
cluster_727	GIAGIGKT	3	0	1	0	7	3	5	2	5	7	0	0	0	0	0	0	1	9	0	0	0	0	6	0	0	0	0	0	0	0	0	0	0	0	0	0	0	0	0	0	0	0	0	0	0	0	0	3
cluster_744	GVAGIGKT	4	5	0	0	4	0	14	0	0	0	0	0	1	0	2	0	0	0	0	0	0	0	1	0	0	0	0	0	0	7	3	0	0	1	5	0	0	0	0	0	1	8	0	0	0	0	1	0
cluster_745	GVAGIGKT	4	1	2	2	2	1	8	9	4	0	0	0	0	0	0	0	0	0	0	0	0	0	0	0	0	0	0	0	0	0	0	0	0	0	0	0	0	0	0	0	0	0	0	0	0	0	0	0
cluster_772	GIAGVGKT	1	1	2	1	0	3	0	0	1	0	0	0	0	0	0	0	0	0	0	0	0	0	0	0	0	0	0	0	0	0	0	0	1	0	0	0	8	1	0	0	2	2	0	1	0	0	0	0
cluster_779	GIAGVGKT	1	30	9	7	15	30	56	43	41	2	11	8	8	2	6	0	0	4	8	8	0	0	5	6	0	13	9	0	0	0	0	0	0	0	0	0	2	0	0	0	0	1	0	0	0	1	0	1
cluster_790	GVAGIGKS	2	17	8	1	18	25	32	29	33	0	4	3	12	19	8	4	20	3	19	54	1	5	16	2	0	0	0	0	0	1	0	0	0	1	5	0	0	0	0	0	0	0	1	0	0	0	0	11
cluster_796	GVAGIGKS	2	3	1	2	0	14	8	8	8	0	18	9	11	0	0	0	7	15	0	0	0	0	6	4	13	10	13	0	1	7	0	0	0	0	0	0	38	0	0	0	0	7	0	3	1	0	2	2
cluster_805	GVAGIGKS	2	10	10	0	0	36	35	13	23	0	10	1	1	0	0	1	19	0	0	0	0	7	0	7	0	0	0	0	0	0	0	0	0	3	0	0	0	0	0	0	0	0	0	0	0	0	0	0
cluster_806	GVAGIGKS	2	1	0	0	0	0	0	0	0	0	1	0	2	1	0	2	0	0	0	0	0	0	0	0	0	1	2	0	0	2	0	0	1	0	0	0	2	0	0	0	0	0	1	0	0	0	0	1
cluster_807	GVAGIGKS	2	21	17	0	24	50	39	32	33	0	0	0	0	0	0	0	0	0	0	0	0	0	0	0	2	0	0	0	0	0	0	0	0	0	0	0	0	0	0	0	0	0	0	0	0	0	0	0
cluster_809	GVAGIGKS	2	13	3	6	11	23	23	19	24	0	0	0	0	0	0	0	0	0	0	0	0	0	0	0	0	0	0	0	0	0	0	0	0	0	0	0	0	0	0	0	0	0	0	0	0	0	0	0
cluster_832	GVAGIGKS	2	0	0	0	0	0	0	0	0	0	0	0	0	0	0	0	0	0	0	0	0	0	0	0	0	0	0	0	0	0	0	0	0	0	0	0	0	0	0	0	0	0	0	0	0	0	0	0
cluster_838	GVAGIGKS	2	0	0	0	0	0	0	0	0	0	0	0	0	0	0	0	0	0	0	0	0	0	0	0	0	0	0	0	0	0	0	0	0	0	0	0	0	0	0	0	0	0	0	0	0	0	0	0
cluster_843	GVAGIGKS	2	0	0	0	0	0	0	0	0	0	0	0	0	0	0	0	0	0	0	0	0	0	0	0	0	0	0	0	0	0	0	0	0	0	0	0	0	0	0	0	0	0	0	0	0	0	0	0
cluster_844	GVAGIGKS	2	26	9	6	13	35	36	15	20	15	32	15	12	16	12	11	18	2	16	6	3	11	8	2	16	13	9	1	1	10	9	7	1	0	2	2	26	5	1	2	6	14	2	0	4	0	0	7
cluster_850	GVAGIGKS	2	13	5	0	0	6	19	6	4	0	0	0	0	0	0	0	0	0	0	0	0	0	0	0	0	0	0	0	0	0	0	0	0	0	0	0	0	0	0	0	0	0	0	0	0	0	0	0
cluster_862	GIAGIGKT	3	43	19	10	26	45	64	52	62	2	10	0	15	2	1	0	3	1	7	7	1	2	5	2	4	28	19	0	5	2	5	1	0	0	0	2	24	2	1	1	0	5	4	4	0	0	1	8
cluster_868	GIAGIGKT	3	1	0	2	3	4	3	3	5	0	0	0	0	0	0	0	0	0	0	0	0	0	0	0	0	0	0	0	0	0	2	0	1	0	0	0	0	0	0	0	0	0	0	0	0	0	0	0
cluster_904	GIAGIGKT	3	12	0	0	18	35	27	25	16	4	8	2	0	3	0	4	3	3	2	5	0	1	4	3	3	9	4	0	0	7	0	1	0	0	1	1	0	3	0	2	0	5	1	0	2	0	2	0
cluster_949	GVAGIGKT	4	9	0	2	0	6	5	12	7	2	0	0	2	0	0	0	0	1	0	3	0	0	0	0	0	0	0	0	0	0	0	0	0	0	0	0	0	0	0	0	0	0	0	0	0	0	0	1
cluster_952	GVAGIGKT	4	28	17	25	26	45	48	23	37	0	11	7	2	0	1	3	2	0	1	1	0	1	2	0	10	5	6	0	1	6	1	2	3	0	0	0	19	0	2	1	2	0	2	0	0	0	0	8
cluster_954	GVAGIGKT	4	0	3	0	7	8	6	5	9	0	0	0	0	0	0	0	0	0	0	0	0	0	0	0	0	0	0	0	0	0	0	0	0	0	0	0	0	0	0	0	0	0	0	0	0	0	0	0
cluster_956	GVAGIGKT	4	0	0	0	0	0	0	0	1	0	0	0	0	0	0	0	0	0	0	0	0	0	0	0	0	0	0	0	0	0	0	0	0	0	0	0	0	0	0	0	0	0	0	0	0	0	0	0
cluster_957	GVAGIGKT	4	35	29	20	30	54	40	47	43	4	1	50	5	40	1	36	42	3	3	32	0	42	8	1	1	35	34	0	0	0	7	0	0	0	0	0	2	0	0	0	5	0	0	0	10	0	1	13
cluster_962	GVAGIGKT	4	4	6	4	4	6	13	0	4	0	0	0	0	0	0	0	0	0	0	0	0	0	0	0	0	0	0	0	0	0	0	0	0	0	0	0	5	0	0	1	0	0	0	0	0	0	0	0
cluster_2000	GIAGVGKT	1	0	0	0	0	0	0	0	0	0	0	0	0	0	0	0	0	0	0	0	0	0	0	0	0	0	0	0	0	0	0	0	0	0	0	0	0	0	0	0	0	0	0	0	0	0	0	0
cluster_2001	GIAGVGKT	1	0	0	0	0	0	0	0	0	0	34	0	0	0	0	0	0	0	0	0	0	0	0	0	0	0	0	0	0	0	0	0	0	0	0	0	0	0	0	0	0	0	0	0	0	0	0	0
cluster_2003	GIAGVGKT	1	19	9	7	19	11	24	27	19	0	14	0	24	0	10	0	0	0	6	18	0	0	7	0	14	1	0	0	6	12	7	0	0	5	5	0	51	0	0	0	1	0	0	0	0	0	2	8
cluster_2009	GIAGVGKT	1	0	0	0	0	0	0	0	0	47	98	0	3	0	0	29	0	37	1	1	0	0	0	0	0	0	0	0	0	0	0	1	2	2	1	0	5	0	0	2	2	0	0	0	0	0	0	0
cluster_2015	GVAGIGKS	2	0	0	0	0	0	0	0	0	0	0	0	0	0	0	0	0	0	0	0	0	0	0	0	0	0	0	0	0	0	0	0	0	0	0	0	0	0	0	0	0	0	0	0	0	0	0	0
cluster_2016	GVAGIGKS	2	0	0	0	0	0	0	0	0	2	3	0	0	0	0	0	0	0	2	0	0	0	0	0	1	0	0	0	0	0	0	0	0	0	0	0	0	0	0	0	0	0	0	0	0	0	0	0
cluster_2021	GVAGIGKS	2	0	0	0	0	0	0	0	0	0	0	0	0	0	0	0	0	0	0	0	0	0	0	0	0	0	0	0	0	0	0	0	0	0	0	0	0	0	0	0	0	0	0	0	0	0	0	0
cluster_2023	GVAGIGKS	2	6	6	3	7	15	14	11	18	0	13	0	0	0	0	0	1	2	12	0	3	4	6	0	13	0	0	0	0	0	0	3	0	1	0	0	0	0	2	4	0	5	0	2	0	0	1	8
cluster_2025	GVAGIGKS	2	0	0	0	0	0	0	0	0	0	0	0	0	0	0	0	0	0	0	0	0	0	0	0	0	0	0	0	0	0	0	0	0	0	0	0	0	0	0	0	0	0	0	0	0	0	0	0
cluster_2026	GVAGIGKS	2	0	0	0	0	0	0	0	0	0	18	0	0	0	0	0	0	1	0	4	0	7	0	0	0	0	0	0	0	0	1	0	0	0	0	1	0	0	0	0	1	0	2	0	2	0	0	0
cluster_2030	GVAGIGKS	2	0	0	0	0	0	0	0	0	0	0	0	0	0	0	0	0	0	0	0	0	0	0	0	0	0	0	0	0	0	0	0	0	0	0	0	0	0	0	0	0	0	0	0	0	0	0	0
cluster_2032	GVAGIGKS	2	0	0	0	0	0	0	0	0	2	34	42	0	0	0	0	0	0	0	36	1	9	0	0	0	0	0	0	0	0	0	0	0	0	0	0	0	0	0	0	0	0	0	0	0	0	0	0
cluster_2034	GVAGIGKS	2	0	0	0	0	0	0	0	0	0	0	0	0	0	0	0	0	0	0	0	0	0	0	0	0	0	0	0	0	14	4	3	0	0	0	6	50	6	0	0	0	4	0	0	0	2	2	5
cluster_2035	GVAGIGKS	2	0	0	0	0	0	0	0	0	25	23	0	0	0	31	0	0	0	48	0	0	0	29	0	0	0	0	0	0	0	1	4	0	2	0	0	0	0	4	0	0	0	0	0	3	3	1	0
cluster_2036	GVAGIGKS	2	0	0	0	0	0	0	0	0	0	28	0	1	0	0	0	0	0	0	0	0	0	0	0	0	0	0	0	0	0	0	0	1	0	0	1	0	0	0	0	0	7	0	0	0	0	0	0
cluster_2037	GVAGIGKS	2	0	0	0	0	0	0	0	0	0	0	0	0	0	0	0	0	0	0	0	0	0	0	0	0	0	0	0	0	0	0	0	0	0	0	0	0	0	0	0	0	0	0	0	0	0	0	0
cluster_2038	GVAGIGKS	2	0	0	3	0	0	0	0	0	0	1	0	2	0	0	0	0	0	0	0	0	0	0	0	2	0	0	0	0	0	0	0	0	0	0	0	0	0	0	0	0	0	0	0	0	0	0	0
cluster_2039	GVAGIGKS	2	0	0	0	0	0	0	0	0	0	0	0	0	0	0	0	0	0	0	0	0	0	0	0	0	0	0	0	0	0	0	0	0	0	0	0	0	0	0	0	0	0	0	0	0	0	0	0
cluster_2040	GVAGIGKS	2	0	0	0	0	0	0	0	0	0	0	0	0	0	0	0	0	0	0	0	0	0	0	0	0	0	0	0	0	0	0	0	0	0	0	0	0	0	0	0	0	0	0	0	0	0	0	0
cluster_2042	GVAGIGKS	2	0	0	0	0	0	0	0	0	0	90	0	1	7	0	25	1	0	3	22	0	31	0	0	0	20	19	0	0	0	0	2	0	0	0	0	0	0	0	0	0	0	0	0	0	0	0	5
cluster_2044	GVAGIGKS	2	0	0	0	0	0	0	0	0	0	22	0	0	0	0	0	0	0	0	0	0	0	0	0	0	0	0	0	0	0	0	0	0	0	2	0	0	0	1	0	0	0	0	0	0	0	0	0
cluster_2049	GVAGIGKS	2	0	0	5	0	0	0	0	0	0	26	0	37	21	23	0	0	0	0	0	0	0	13	0	0	0	0	0	0	0	0	0	0	0	0	6	66	0	0	0	0	9	0	1	0	0	0	0
cluster_2056	GVAGIGKS	2	0	0	0	0	0	0	0	0	0	15	0	0	0	0	0	0	0	0	11	0	0	0	0	0	0	0	0	0	0	0	0	0	0	0	0	0	0	0	0	0	0	0	0	4	0	0	3
cluster_2057	GVAGIGKS	2	0	0	0	0	0	0	0	0	10	13	15	26	0	27	5	15	0	21	0	0	0	4	12	0	23	13	0	0	0	0	0	2	0	0	0	0	0	0	0	0	0	0	0	0	0	0	2
cluster_2060	GVAGIGKS	2	0	0	0	0	0	0	0	0	0	0	0	0	0	1	0	0	0	0	0	0	0	0	0	0	0	0	0	0	0	0	0	0	0	0	0	0	0	0	0	0	0	0	0	0	0	0	0
cluster_2064	GVAGIGKS	2	0	0	0	0	0	0	0	0	0	0	0	0	0	0	0	0	0	0	0	0	0	0	0	0	0	0	0	0	0	0	0	0	0	0	0	0	0	0	0	0	0	0	0	0	0	0	0
cluster_2067	GVAGIGKS	2	0	0	0	1	0	1	0	0	0	1	0	0	1	0	0	0	0	0	0	0	0	0	0	0	1	1	0	0	0	0	0	0	0	1	0	0	1	0	0	1	0	0	0	0	1	0	0
cluster_2069	GVAGIGKS	2	0	0	1	0	0	0	0	0	7	5	1	3	3	3	3	2	2	1	3	0	0	2	2	3	4	1	0	0	1	0	3	0	0	1	0	15	0	0	0	0	0	0	0	0	0	0	1
cluster_2076	GVAGIGKS	2	1	1	0	2	0	0	0	3	0	9	0	0	7	0	15	3	4	2	6	0	0	6	3	7	2	5	0	2	2	4	0	0	1	0	0	1	0	0	1	1	1	0	0	1	1	1	0
cluster_2085	GVAGIGKS	2	0	0	7	0	0	0	0	0	0	16	26	29	0	0	0	0	0	0	0	0	0	0	0	0	0	0	0	0	0	0	4	0	0	1	5	70	3	2	1	3	8	0	5	0	1	3	0
cluster_2087	GVAGIGKS	2	0	0	0	0	0	0	0	0	0	10	4	0	0	0	0	9	0	0	0	0	0	0	0	3	0	0	0	0	0	0	0	0	0	0	0	0	0	0	0	0	0	0	0	0	0	0	0
cluster_2090	GVAGIGKS	2	0	0	0	0	0	0	0	0	0	24	0	0	0	0	0	0	0	0	0	0	8	0	0	0	0	0	0	0	0	0	0	0	0	0	0	0	0	0	0	0	0	0	0	0	0	0	0
cluster_2095	GVAGIGKS	2	0	0	0	0	0	0	0	0	0	0	0	0	0	0	0	0	0	0	0	0	0	0	0	0	0	0	0	0	0	0	0	0	0	0	0	0	0	0	0	0	0	0	0	0	0	0	0
cluster_2098	GVAGIGKS	2	0	0	0	0	0	0	0	0	0	0	0	0	0	0	0	0	0	0	0	0	0	0	0	0	0	0	0	0	0	0	0	0	0	0	0	0	0	0	0	0	0	0	0	0	0	0	0
cluster_2200	GIAGIGKT	3	0	0	0	0	0	0	0	0	0	5	12	2	2	4	3	0	14	4	0	0	1	3	0	0	0	0	0	0	0	0	0	0	0	0	0	9	0	0	0	0	0	0	0	0	0	0	3
cluster_2203	GIAGIGKT	3	0	0	0	0	0	0	0	0	14	55	26	21	13	0	23	0	0	18	14	0	16	4	14	0	15	14	0	0	0	0	0	0	0	0	2	0	0	0	0	0	0	1	0	0	0	0	0
cluster_2204	GIAGIGKT	3	0	0	0	0	0	0	0	0	0	3	2	3	0	0	0	5	4	1	0	0	2	0	1	0	3	7	0	0	0	0	0	0	0	0	0	0	0	0	0	0	0	0	0	0	0	0	0
cluster_2208	GIAGIGKT	3	0	0	0	0	0	0	0	0	0	29	0	1	0	0	0	0	0	0	0	1	14	1	0	0	0	0	0	0	0	3	0	0	0	0	6	0	0	0	0	0	0	0	0	0	0	0	0
cluster_2211	GIAGIGKT	3	0	0	0	0	0	0	0	0	0	4	18	0	26	0	0	10	14	13	0	0	8	10	2	0	0	0	0	0	0	0	0	0	0	0	0	0	0	0	0	0	0	0	0	0	0	0	0
cluster_2216	GIAGIGKT	3	0	0	0	0	0	0	0	0	0	0	0	0	0	0	0	0	0	0	0	0	0	0	0	0	0	0	0	0	0	0	0	0	0	0	0	0	0	0	0	0	0	0	0	0	0	0	0
cluster_2227	GIAGIGKT	3	0	0	0	0	0	0	0	0	0	0	0	0	0	0	0	0	0	0	0	0	0	0	0	0	0	0	0	0	0	0	0	0	0	0	0	0	0	0	0	0	0	0	0	0	0	0	0
cluster_2229	GIAGIGKT	3	0	0	0	0	0	0	0	0	0	38	26	24	9	0	0	19	14	14	0	0	4	16	2	16	10	13	0	0	0	0	0	0	0	0	0	0	0	0	0	0	0	0	0	0	0	0	0
cluster_2232	GIAGIGKT	3	0	0	0	0	0	0	0	0	0	31	1	18	0	1	0	32	20	23	14	0	0	9	0	7	50	33	0	0	2	1	0	0	1	0	0	0	4	0	0	0	1	0	2	1	0	0	0
cluster_2233	GIAGIGKT	3	0	0	0	0	0	0	0	0	0	0	0	0	0	0	0	0	0	0	0	0	0	0	0	0	0	0	0	0	0	0	0	0	0	0	0	0	0	0	0	0	0	0	0	0	0	0	0
cluster_2235	GIAGIGKT	3	0	0	0	0	0	0	0	0	0	0	0	0	0	0	0	0	0	0	0	0	0	0	0	0	0	0	0	0	0	0	0	0	0	0	0	0	0	0	0	0	0	0	0	0	0	0	0
cluster_2238	GIAGIGKT	3	0	0	0	0	0	0	0	0	0	5	0	0	0	0	0	0	0	0	0	0	0	0	3	0	0	0	0	0	0	0	0	0	0	0	0	0	0	0	0	0	0	0	0	0	0	0	0
cluster_2239	GIAGIGKT	3	0	0	0	0	0	0	0	0	0	16	0	0	0	0	0	1	2	0	0	0	0	0	0	1	0	1	0	0	0	0	0	0	1	0	0	0	0	0	0	0	1	0	0	0	0	0	0
cluster_2242	GIAGIGKT	3	0	0	0	0	0	0	0	0	0	1	4	0	2	0	1	0	2	0	0	0	1	3	0	2	0	0	0	0	0	0	0	0	0	0	0	0	0	0	0	0	0	0	0	0	0	0	4
cluster_2244	GIAGIGKT	3	0	0	0	0	0	0	0	0	0	31	0	0	0	0	0	0	0	0	0	0	0	0	0	0	0	0	0	0	0	0	0	0	0	0	0	0	0	0	0	0	0	0	0	0	0	0	0
cluster_2253	GIAGIGKT	3	0	0	0	0	0	0	0	0	0	0	0	0	0	0	0	0	0	0	0	0	0	0	0	0	0	0	0	0	0	0	0	0	0	0	0	0	0	0	0	0	0	0	0	0	0	0	0
cluster_2255	GIAGIGKT	3	0	0	0	0	0	0	0	0	0	14	27	0	0	0	39	1	17	18	16	3	0	0	15	0	0	0	0	0	0	0	0	0	0	0	0	0	0	0	1	0	4	0	0	0	0	0	0
cluster_2264	GIAGIGKT	3	0	0	0	0	0	0	0	0	0	0	0	0	0	0	0	0	0	0	0	0	0	0	0	0	0	0	0	0	0	0	0	0	0	0	0	0	0	0	0	0	0	0	0	0	0	0	0
cluster_2271	GIAGIGKT	3	0	0	0	0	0	0	0	0	16	28	0	0	0	1	0	0	12	0	0	0	0	0	7	0	0	0	0	0	0	0	0	0	0	0	0	0	0	0	0	0	0	0	0	0	0	0	1
cluster_2276	GIAGIGKT	3	0	0	0	0	0	0	0	0	0	51	0	0	0	0	0	0	0	0	21	0	16	0	0	0	0	0	0	0	0	0	0	0	0	0	0	0	0	0	0	0	0	0	0	0	0	0	0
cluster_2277	GIAGIGKT	3	0	0	0	0	0	0	0	0	1	7	1	0	1	4	0	6	1	4	5	0	4	3	0	1	0	2	0	0	0	0	0	0	0	0	0	0	0	0	0	0	0	0	0	0	0	0	0
cluster_2282	GIAGIGKT	3	0	0	0	0	1	0	0	0	0	19	0	9	0	0	0	0	4	0	0	0	4	8	0	0	16	12	0	0	0	0	0	0	0	0	0	10	0	0	0	0	0	0	1	1	1	0	0
cluster_2289	GIAGIGKT	3	0	0	0	0	0	0	0	0	0	15	8	14	11	0	20	0	0	0	0	2	10	3	0	1	0	0	0	0	0	0	0	0	0	0	0	0	0	0	0	0	0	0	0	0	0	0	7
cluster_2296	GVAGIGKT	4	0	0	0	0	0	0	0	0	2	1	2	0	0	0	0	0	0	0	0	0	0	0	0	0	0	0	0	0	0	0	0	0	0	0	0	0	0	0	0	0	0	0	0	0	0	0	0
cluster_2299	GVAGIGKT	4	0	0	0	0	0	0	0	0	34	27	34	28	0	52	0	0	1	14	0	0	0	8	0	0	0	0	0	0	0	1	1	0	0	0	0	1	1	0	0	0	0	0	0	0	2	0	0
cluster_2300	GVAGIGKT	4	0	0	0	0	0	0	0	0	0	28	0	76	1	26	0	17	0	0	14	3	0	12	0	0	0	0	0	0	0	0	0	0	0	0	0	0	0	0	0	0	0	0	0	0	0	0	0
cluster_2304	GVAGIGKT	4	0	0	0	0	0	0	0	0	0	8	0	0	0	0	6	0	5	6	0	0	0	0	0	0	0	0	0	0	0	0	0	0	0	0	0	0	0	0	1	0	0	1	0	0	0	0	0
cluster_2305	GVAGIGKT	4	0	0	0	0	0	0	0	0	16	37	0	28	17	18	14	0	34	29	16	3	0	3	1	4	26	26	0	0	0	0	0	0	0	0	0	0	0	0	0	0	0	0	0	0	0	0	4
cluster_2308	GVAGIGKT	4	0	0	0	0	0	0	0	0	0	0	0	0	0	0	0	0	0	0	0	0	0	0	0	0	0	0	0	0	0	0	0	0	0	0	0	0	0	0	0	0	0	0	0	0	0	0	0
cluster_2311	GVAGIGKT	4	1	0	1	2	0	0	1	0	0	9	12	0	0	0	0	0	10	0	0	0	0	8	0	0	0	0	0	0	0	0	2	0	0	1	0	0	0	0	1	0	4	0	0	3	2	0	1
cluster_2312	GVAGIGKT	4	0	0	0	0	0	0	0	0	14	33	0	8	8	8	7	6	15	24	8	3	0	10	9	0	21	27	0	1	0	0	0	0	1	1	0	0	0	0	0	0	0	4	10	0	0	0	10
cluster_2318	GVAGIGKT	4	0	0	0	0	0	0	0	0	0	0	0	0	0	0	0	0	0	0	0	0	0	0	0	0	0	0	0	0	0	0	0	0	0	0	0	0	0	0	0	0	0	0	0	0	0	0	0
cluster_2324	GVAGIGKT	4	0	0	0	0	0	0	0	0	2	7	8	0	0	0	0	0	0	0	0	0	1	3	4	0	6	4	0	0	0	0	0	0	0	0	1	0	0	0	0	0	0	0	0	0	0	0	1
cluster_2330	GVAGIGKT	4	0	0	0	0	0	0	0	0	0	6	0	0	0	0	0	0	0	0	0	0	0	0	0	0	0	0	0	0	0	0	0	0	0	0	0	0	0	0	0	0	0	0	0	0	0	0	0
cluster_2332	GVAGIGKT	4	0	0	0	0	0	0	0	0	0	0	0	0	0	0	0	0	0	0	0	0	0	0	0	0	0	0	0	0	0	0	0	0	0	0	0	0	0	0	0	0	0	0	0	0	0	0	0
cluster_2333	GVAGIGKT	4	0	0	0	0	0	0	0	0	2	4	0	0	1	0	1	0	0	4	0	0	0	1	4	1	0	2	0	1	0	0	1	0	3	0	4	13	1	0	0	0	3	6	1	2	0	0	0
cluster_2334	GVAGIGKT	4	0	0	0	0	0	0	0	0	0	1	0	0	0	0	0	0	1	0	0	0	0	0	0	0	0	0	0	0	0	0	0	0	0	0	0	0	0	0	0	0	0	0	0	0	0	0	0
cluster_2335	GVAGIGKT	4	0	0	0	0	0	0	0	0	1	47	40	77	30	0	29	0	0	0	0	3	13	0	0	0	22	20	0	0	0	0	0	0	0	0	0	0	0	0	0	0	0	0	0	1	0	0	0
cluster_2342	GVAGIGKT	4	0	0	0	0	0	0	0	0	12	28	17	15	18	27	6	10	7	12	3	1	3	7	3	1	17	6	0	0	0	0	0	0	0	0	0	0	0	0	0	0	0	0	0	0	0	0	1
cluster_2349	GIAGVGKT	1	0	0	0	0	0	0	0	0	19	50	27	12	36	0	20	9	6	9	16	0	4	30	0	22	18	20	0	0	0	0	0	0	0	0	0	0	0	0	0	0	0	0	0	0	0	0	0
cluster_2370	GIAGVGKT	1	0	0	0	0	0	0	0	0	2	7	27	11	15	9	15	8	6	9	5	0	3	6	0	1	5	1	0	0	0	0	0	0	0	1	0	0	0	0	0	0	0	0	0	0	0	0	0
cluster_2374	GIAGVGKT	1	0	0	0	0	0	0	0	0	0	0	0	0	0	0	0	0	0	0	0	0	0	0	0	0	0	0	0	0	0	0	0	0	0	0	0	0	0	0	0	0	0	0	0	0	0	0	0
cluster_2392	GIAGVGKT	1	2	0	0	0	0	0	0	0	0	0	13	0	15	0	0	10	6	0	0	2	3	4	0	5	0	0	0	0	0	0	0	0	0	0	0	0	0	0	0	0	0	0	0	0	0	0	5
cluster_2398	GIAGVGKT	1	0	0	0	0	0	0	0	0	7	0	60	1	1	0	3	0	0	0	1	0	16	0	0	0	0	0	0	0	0	0	0	0	0	0	0	0	0	0	0	0	0	0	0	0	0	0	0
cluster_2400	GIAGVGKT	1	0	0	0	0	0	0	0	0	22	2	17	45	3	48	16	19	0	0	3	1	0	4	1	0	11	11	0	0	0	0	8	0	5	2	4	68	2	2	0	0	6	2	3	12	0	2	6
cluster_2401	GIAGVGKT	1	0	0	0	0	0	0	0	0	0	0	3	0	0	0	0	0	0	0	0	0	0	0	0	0	0	0	0	0	1	0	0	0	0	0	0	2	0	0	0	1	0	0	0	0	0	0	0
cluster_2405	GIAGVGKT	1	0	0	0	0	0	0	0	0	0	0	0	0	0	0	0	0	0	0	0	0	0	0	0	0	0	0	0	0	1	0	1	0	0	0	1	7	0	0	0	0	2	2	0	0	0	0	1
cluster_2413	GVAGIGKS	2	0	0	0	0	0	0	0	0	0	1	21	1	35	0	12	15	0	15	0	0	0	0	0	0	0	0	0	1	0	0	0	0	1	1	1	28	0	0	0	0	3	0	1	2	0	0	11
cluster_2426	GVAGIGKS	2	0	0	0	0	0	0	0	0	0	1	15	29	0	1	16	13	9	0	0	0	0	0	0	0	0	0	0	0	3	2	0	0	0	0	1	0	4	0	3	0	0	0	0	0	1	3	0
cluster_2427	GVAGIGKS	2	0	0	0	0	0	0	0	0	0	13	0	0	0	0	0	2	5	8	0	0	0	2	0	0	0	0	0	0	0	0	0	0	0	0	0	0	0	0	0	0	0	0	0	0	0	0	0
cluster_2431	GVAGIGKS	2	0	0	0	0	0	0	0	0	0	0	0	0	1	0	0	0	0	0	0	0	0	0	2	1	0	0	0	0	0	0	0	0	0	0	0	0	0	0	0	0	0	0	0	0	0	0	0
cluster_2434	GVAGIGKS	2	0	0	0	0	1	0	0	0	2	7	14	6	7	5	1	10	3	5	3	1	1	6	0	2	1	0	0	0	0	0	0	0	0	0	0	0	0	0	0	0	0	0	0	0	0	0	0
cluster_2442	GVAGIGKS	2	0	0	0	0	0	0	0	0	0	0	22	0	1	0	0	0	0	0	0	0	0	0	0	0	0	0	0	0	0	0	0	0	0	0	0	0	0	0	0	0	0	0	0	0	0	0	0
cluster_2443	GVAGIGKS	2	0	0	0	0	0	0	0	0	0	1	17	22	0	12	7	9	0	8	0	1	12	0	0	0	0	0	0	0	0	0	2	0	0	0	0	0	0	0	3	0	0	0	0	0	0	0	0
cluster_2447	GVAGIGKS	2	0	0	0	0	0	0	0	0	0	0	16	0	0	0	0	0	0	0	0	0	0	0	0	0	0	0	0	0	0	0	0	0	0	0	0	0	0	0	0	0	0	0	0	0	0	0	0
cluster_2450	GVAGIGKS	2	0	0	0	0	0	0	0	0	0	0	0	0	0	0	0	0	0	0	0	0	0	0	0	0	0	0	0	0	0	0	0	0	0	0	0	0	0	0	0	0	0	0	0	0	0	0	0
cluster_2466	GVAGIGKS	2	0	0	0	0	0	0	0	0	0	0	46	0	0	0	0	0	0	0	0	0	0	0	0	0	0	0	0	0	0	0	0	0	0	0	0	0	0	0	0	0	0	0	0	0	0	3	0
cluster_2471	GVAGIGKS	2	0	0	0	0	0	0	0	0	0	0	34	0	0	0	0	0	0	0	0	0	0	0	0	0	0	0	0	3	0	0	0	0	5	0	8	0	0	0	0	0	0	3	4	0	1	0	0
cluster_2481	GVAGIGKS	2	0	0	0	0	0	0	0	0	0	12	42	0	0	0	1	0	15	0	0	0	22	0	0	0	0	0	0	0	0	0	0	0	0	0	0	0	0	0	0	0	0	0	0	0	0	0	0
cluster_2482	GVAGIGKS	2	0	0	0	0	0	0	0	0	0	0	0	0	0	0	0	0	0	0	0	0	0	0	0	0	0	0	0	0	0	0	0	0	0	0	0	0	0	0	0	0	0	0	0	0	0	0	0
cluster_2486	GVAGIGKS	2	0	0	0	0	0	0	0	0	0	0	1	0	0	0	0	0	0	0	0	0	0	0	0	0	0	0	0	0	0	0	2	0	0	1	0	9	0	0	0	0	0	0	0	0	0	0	0
cluster_2487	GVAGIGKS	2	0	0	0	0	0	0	0	0	0	0	39	0	0	0	0	0	0	0	0	0	0	0	0	0	0	0	0	0	0	0	0	0	0	0	0	0	0	0	0	0	0	0	0	0	0	0	2
cluster_2493	GVAGIGKS	2	0	0	0	0	0	0	0	0	0	0	70	1	0	0	0	0	0	0	0	0	0	0	0	0	0	0	0	0	0	0	0	0	0	0	0	0	0	0	0	0	0	0	0	0	0	0	0
cluster_2494	GVAGIGKS	2	0	0	0	0	0	0	0	0	0	0	0	0	0	0	0	0	0	0	0	0	0	0	0	0	0	0	0	0	0	0	0	0	0	0	0	0	0	0	0	0	0	0	0	0	0	0	0
cluster_2502	GVAGIGKS	2	0	0	0	0	0	0	0	0	0	5	27	0	0	0	0	0	16	0	0	0	6	0	0	0	0	0	0	0	0	0	0	0	0	0	0	0	0	0	0	0	0	0	0	0	0	0	0
cluster_2508	GVAGIGKS	2	0	0	0	0	0	0	0	0	0	0	0	0	0	0	0	0	0	0	0	0	0	0	0	0	0	0	0	0	0	0	0	0	0	0	0	0	0	0	0	0	0	0	0	0	0	0	0
cluster_2515	GVAGIGKS	2	0	0	0	0	0	0	0	0	0	0	0	0	0	0	0	0	0	0	0	0	0	0	0	0	0	0	0	0	0	0	0	0	0	0	0	0	0	0	0	0	0	0	0	0	0	0	0
cluster_2523	GVAGIGKS	2	0	0	0	0	0	0	0	0	0	0	0	0	0	0	0	0	0	0	0	0	0	0	0	0	0	0	0	0	0	0	0	0	0	0	0	0	0	0	0	0	0	0	0	0	0	0	0
cluster_2530	GVAGIGKS	2	0	0	0	0	0	0	0	0	0	0	31	0	26	0	0	0	0	0	0	2	0	5	0	0	0	0	0	0	0	0	0	0	1	1	0	24	0	1	0	0	0	1	3	0	0	2	0
cluster_2531	GIAGIGKT	3	0	0	0	0	0	0	0	0	0	1	2	0	5	0	0	0	0	0	0	0	0	0	1	0	0	0	0	0	0	0	0	0	0	0	0	0	0	1	0	0	0	0	0	0	0	0	0
cluster_2543	GIAGIGKT	3	0	0	0	0	0	0	0	0	0	0	0	0	0	0	0	0	0	0	0	0	0	0	0	0	0	0	0	0	0	0	0	0	0	0	0	0	0	0	0	0	0	0	0	0	0	0	0
cluster_2546	GIAGIGKT	3	3	0	2	0	1	0	2	4	0	24	33	0	27	0	0	0	19	0	20	0	0	24	0	8	0	0	0	4	0	2	2	2	2	2	0	0	0	2	1	0	3	1	0	0	2	0	0
cluster_2547	GIAGIGKT	3	0	0	0	0	0	0	0	0	0	6	8	13	19	4	4	4	11	1	8	0	0	6	6	0	0	0	0	1	3	0	1	0	0	0	0	0	0	1	0	0	0	0	0	0	0	0	4
cluster_2548	GIAGIGKT	3	0	0	0	0	0	0	0	0	0	0	0	2	4	0	0	0	0	0	0	0	0	0	0	0	0	0	0	0	0	0	0	0	0	0	0	0	0	0	0	0	0	0	0	0	0	0	0
cluster_2553	GIAGIGKT	3	0	0	0	0	0	0	0	0	5	6	13	8	3	10	6	7	11	8	8	1	2	7	0	1	3	1	0	0	0	0	0	0	0	0	0	0	0	0	0	0	0	0	0	0	0	0	1
cluster_2560	GIAGIGKT	3	0	0	0	0	0	0	0	0	28	41	30	21	43	30	33	15	24	12	26	0	11	25	24	12	14	16	0	0	0	0	0	0	0	0	0	0	0	0	0	0	0	0	0	0	0	0	0
cluster_2565	GIAGIGKT	3	0	0	0	0	0	0	0	0	16	0	28	1	0	15	15	0	0	23	17	1	0	0	0	0	0	0	0	0	0	0	0	0	0	0	0	0	0	0	0	0	0	0	0	0	0	0	0
cluster_2572	GIAGIGKT	3	0	0	0	0	3	2	0	0	6	21	37	0	4	0	4	0	8	2	3	0	6	4	9	15	16	20	0	0	0	0	0	0	0	0	0	0	0	0	0	0	1	0	0	0	0	1	0
cluster_2575	GIAGIGKT	3	0	0	0	0	0	0	0	0	0	0	0	0	0	0	0	0	0	0	0	0	0	0	0	0	0	0	0	0	0	0	0	0	0	0	0	0	0	0	0	0	0	0	0	0	0	0	0
cluster_2577	GIAGIGKT	3	0	0	0	0	0	0	0	0	0	0	16	0	6	0	0	0	0	0	1	0	0	2	0	0	0	0	0	0	0	0	0	0	0	0	0	0	0	0	0	0	0	0	0	0	0	0	0
cluster_2589	GIAGIGKT	3	0	0	0	0	0	0	0	0	0	0	23	0	0	30	24	0	0	0	0	0	0	0	0	0	0	0	0	0	0	0	0	0	0	0	0	0	0	0	0	0	0	0	0	0	0	0	0
cluster_2594	GIAGIGKT	3	0	0	0	0	0	0	0	0	0	0	0	0	0	0	0	0	0	0	0	0	0	0	0	0	0	0	0	0	0	0	0	0	0	0	0	0	0	0	0	0	0	0	0	0	0	0	0
cluster_2625	GIAGIGKT	3	0	0	0	0	0	0	0	0	12	34	38	6	12	13	10	14	13	18	10	1	6	13	3	8	8	9	0	0	0	0	0	0	0	0	0	0	0	0	0	0	0	0	0	0	0	0	0
cluster_2630	GIAGIGKT	3	0	0	0	0	0	0	0	0	0	0	19	0	0	0	0	0	0	0	0	0	0	0	0	0	0	0	0	0	0	0	0	0	0	0	0	0	0	0	0	2	0	0	0	0	0	0	7
cluster_2637	GIAGIGKT	3	0	0	0	0	0	0	0	0	1	0	59	2	0	0	3	0	0	0	0	0	0	0	0	1	4	3	0	0	0	0	0	0	0	0	0	0	0	0	0	0	0	0	0	0	0	0	0
cluster_2659	GIAGIGKT	3	0	0	0	0	0	0	0	0	0	0	13	0	0	0	0	0	0	0	0	0	0	0	0	0	0	0	0	0	0	0	0	0	0	0	0	0	0	0	0	0	0	0	0	0	0	0	0
cluster_2673	GIAGIGKT	3	0	0	0	0	0	0	0	0	0	0	21	0	2	5	0	1	1	0	1	0	0	0	0	0	0	0	0	0	0	0	0	0	0	1	0	0	0	0	0	0	0	0	0	0	1	0	1
cluster_2683	GIAGIGKT	3	0	0	0	0	0	0	0	0	0	0	1	0	0	0	0	0	0	0	0	0	0	0	0	0	0	0	0	0	0	0	0	0	0	0	0	0	0	0	0	0	0	0	0	0	0	0	0
cluster_2687	GVAGIGKT	4	0	0	0	0	0	0	0	0	0	0	0	0	0	0	0	0	0	0	0	0	0	0	0	0	0	0	0	0	0	0	0	0	0	0	0	0	0	0	0	0	0	0	0	0	0	0	0
cluster_2815	GVAGIGKS	2	2	4	0	6	6	9	10	8	0	0	0	22	0	26	25	0	0	0	12	0	0	0	0	0	23	22	0	0	0	0	0	0	0	0	0	53	0	0	0	0	1	0	0	0	3	0	0
cluster_2833	GVAGIGKS	2	0	0	0	0	0	0	0	0	0	0	0	27	0	0	0	0	0	0	0	1	0	0	1	0	0	0	0	0	0	0	0	3	0	0	0	0	0	0	0	0	0	0	0	4	0	0	9
cluster_2843	GVAGIGKS	2	0	0	0	0	0	0	0	0	0	0	0	0	0	0	0	0	0	0	0	0	0	0	0	0	0	0	0	0	0	0	0	0	0	0	0	0	0	0	0	0	0	0	0	0	0	0	0
cluster_2861	GVAGIGKS	2	0	0	0	0	0	0	0	0	0	0	0	0	0	0	0	0	0	0	0	0	0	0	0	0	0	0	0	0	0	0	0	0	0	0	0	0	0	0	0	0	0	0	0	0	0	0	0
cluster_2865	GVAGIGKS	2	0	0	0	0	0	0	0	0	0	0	0	0	0	0	0	0	0	0	0	0	0	0	0	0	0	0	0	0	0	0	0	0	0	0	0	0	0	0	0	0	0	0	0	0	0	0	0
cluster_2866	GVAGIGKS	2	0	0	0	0	0	0	0	0	0	1	0	17	0	0	0	0	0	0	2	0	0	0	0	0	0	0	0	0	0	0	0	0	0	0	0	0	0	0	0	0	0	0	0	0	0	0	1
cluster_2867	GVAGIGKS	2	0	0	0	0	0	0	0	0	0	0	0	0	0	0	0	0	0	0	0	0	0	0	0	0	0	0	0	0	0	0	0	0	0	0	0	0	0	0	0	0	0	0	0	0	0	0	0
cluster_2868	GVAGIGKS	2	0	0	0	0	0	0	0	0	5	0	0	12	0	9	0	0	0	0	0	0	0	1	0	1	0	0	0	0	0	0	0	0	0	0	0	0	0	0	0	0	0	0	0	0	0	0	0
cluster_2874	GVAGIGKS	2	0	0	0	0	0	0	0	0	0	0	0	0	0	0	0	0	0	0	0	0	0	0	0	0	0	0	0	0	0	0	0	0	0	0	0	0	0	0	0	0	0	0	0	0	0	0	0
cluster_2877	GVAGIGKS	2	0	0	0	0	0	0	0	0	0	0	0	31	0	27	0	0	0	0	0	0	0	2	0	0	0	0	0	0	0	0	0	0	0	0	0	0	0	0	0	0	0	0	0	0	0	0	0
cluster_2879	GVAGIGKS	2	0	0	0	0	0	0	0	0	0	0	0	36	24	0	0	0	0	0	0	0	0	0	0	0	0	0	0	0	0	0	0	0	0	0	0	0	0	0	0	0	0	0	0	0	0	0	0
cluster_2886	GVAGIGKS	2	0	0	11	0	0	0	0	0	0	0	0	26	0	0	0	0	0	17	0	0	0	0	0	0	4	5	0	0	0	0	0	2	0	0	2	1	9	1	0	1	4	0	0	0	2	0	0
cluster_2889	GVAGIGKS	2	0	0	0	0	0	0	0	0	0	0	0	0	0	0	0	0	0	0	0	0	0	0	0	0	0	0	0	0	0	0	0	0	0	0	0	0	0	0	0	0	0	0	0	0	0	0	0
cluster_2922	GIAGIGKT	3	7	1	0	0	8	0	2	0	0	0	0	0	0	0	1	0	0	0	0	0	0	2	0	0	1	0	0	0	0	1	0	2	2	0	0	0	2	0	0	1	0	0	0	3	0	0	0
cluster_2924	GIAGIGKT	3	0	0	0	0	0	0	0	0	0	0	0	23	22	51	0	0	0	0	0	0	0	0	0	0	0	0	0	0	0	0	0	0	0	0	0	0	0	0	0	0	0	0	0	0	0	0	0
cluster_2926	GIAGIGKT	3	0	0	0	0	0	0	0	0	0	0	0	0	0	0	0	0	0	0	0	0	0	0	0	0	0	0	0	0	0	0	0	0	0	0	0	0	0	0	0	0	0	0	0	0	0	0	0
cluster_2929	GIAGIGKT	3	0	0	0	0	0	0	0	0	0	0	0	0	0	0	0	0	0	1	0	0	0	1	0	0	0	0	0	0	0	0	0	0	0	0	0	0	0	0	0	0	0	0	0	0	0	0	0
cluster_2934	GIAGIGKT	3	0	0	0	0	0	0	0	0	0	2	0	4	0	0	0	0	0	1	0	0	0	2	1	0	4	1	0	0	0	0	3	6	0	0	1	0	1	0	1	0	0	0	0	0	0	0	0
cluster_2937	GIAGIGKT	3	0	0	0	0	0	0	0	0	12	1	20	31	19	19	21	14	22	26	26	1	10	14	10	17	10	17	0	0	0	0	0	0	0	0	0	0	0	0	0	0	0	0	0	0	0	0	0
cluster_2945	GIAGIGKT	3	0	0	0	0	0	0	0	0	0	3	0	28	0	0	0	0	1	0	0	0	0	0	0	0	14	13	0	0	0	0	0	0	0	0	0	0	0	0	0	0	0	0	0	0	0	0	0
cluster_2946	GIAGIGKT	3	0	0	0	0	0	0	0	0	0	0	0	0	0	0	0	0	0	0	0	0	0	0	0	0	0	0	0	0	0	0	0	0	0	0	0	0	0	0	0	0	0	0	0	0	0	0	0
cluster_2981	GIAGIGKT	3	0	0	0	0	0	0	0	0	0	0	0	0	0	0	0	0	0	0	0	0	0	0	0	0	0	0	0	0	0	0	0	0	0	0	0	0	0	0	0	0	0	0	0	0	0	0	0
cluster_2992	GIAGIGKT	3	0	0	0	0	0	0	0	0	0	16	1	12	2	0	0	1	0	1	12	0	2	0	1	1	1	1	0	0	0	0	0	0	0	0	0	1	0	0	0	0	0	0	0	0	0	0	0
cluster_3100	GVAGIGKS	2	0	0	6	0	0	0	0	0	0	0	0	0	25	0	0	1	0	0	0	0	11	0	0	0	14	14	0	0	0	0	0	0	0	0	0	0	0	0	0	0	0	0	0	0	0	0	0
cluster_3108	GVAGIGKS	2	0	0	0	0	0	0	0	0	0	14	0	0	30	0	0	0	0	7	0	0	0	0	0	0	0	0	0	0	0	0	0	0	0	0	0	0	0	0	0	0	0	0	0	0	0	0	0
cluster_3121	GVAGIGKS	2	0	0	0	0	0	0	0	0	0	0	0	0	1	0	0	0	0	4	0	0	0	0	0	0	0	0	0	0	0	0	0	0	0	0	0	0	0	0	0	0	0	0	0	0	0	0	0
cluster_3124	GVAGIGKS	2	0	0	0	0	0	0	0	0	0	0	0	0	0	0	0	1	0	0	0	0	0	0	0	0	0	0	0	0	0	0	0	0	0	0	0	0	0	0	0	0	0	0	0	0	0	0	0
cluster_3125	GVAGIGKS	2	0	0	0	0	0	0	0	0	1	0	0	0	35	0	0	0	23	26	65	0	17	25	0	0	0	0	0	0	0	0	0	0	0	0	0	0	0	0	0	1	0	0	0	0	0	0	0
cluster_3126	GVAGIGKS	2	0	0	0	0	0	0	0	0	0	0	0	0	11	1	8	0	0	0	32	0	0	0	0	0	0	0	0	0	0	0	0	0	0	0	0	0	0	0	0	0	0	0	0	0	0	0	0
cluster_3145	GVAGIGKS	2	0	0	0	0	0	0	0	0	0	0	0	0	0	0	0	0	0	0	0	0	0	0	0	0	0	0	0	0	0	0	0	0	0	0	0	0	0	0	0	0	0	0	0	0	0	0	0
cluster_3149	GVAGIGKS	2	0	0	0	0	0	0	0	0	0	0	0	0	18	1	19	0	0	0	15	0	13	1	0	0	0	0	0	0	0	0	0	0	0	0	0	0	0	0	0	0	0	0	0	0	0	0	10
cluster_3152	GVAGIGKS	2	0	0	1	6	0	0	0	0	2	14	6	7	14	4	16	4	2	24	1	0	0	3	0	11	10	17	0	0	0	1	3	0	1	1	1	0	0	1	0	0	4	6	0	3	1	0	1
cluster_3170	GVAGIGKS	2	0	0	0	0	0	0	0	0	0	0	0	0	0	0	0	0	0	0	0	0	0	0	0	0	0	0	0	0	0	0	0	0	0	0	0	0	0	0	0	0	0	0	0	0	0	0	0
cluster_3173	GVAGIGKS	2	0	0	0	0	0	0	0	0	0	6	1	0	4	1	0	1	3	1	2	1	0	1	0	0	0	0	0	0	0	0	0	0	0	0	0	0	0	0	0	0	0	0	0	0	0	0	2
cluster_3174	GVAGIGKS	2	0	0	0	0	0	0	0	0	0	0	0	0	0	0	0	0	0	0	0	0	0	0	0	0	0	0	0	0	0	0	0	0	0	0	0	0	0	0	0	0	0	0	0	0	0	0	0
cluster_3177	GVAGIGKS	2	0	0	0	0	0	0	0	0	0	0	0	0	0	0	0	0	0	0	0	0	0	0	0	0	0	0	0	0	0	0	0	0	0	0	0	0	1	0	0	0	0	0	0	0	1	0	0
cluster_3183	GVAGIGKS	2	0	0	2	0	0	0	0	0	0	0	15	0	38	0	2	0	9	3	0	0	5	0	0	0	32	33	0	0	0	2	0	0	0	1	2	0	4	0	0	0	2	0	0	0	0	0	10
cluster_3197	GVAGIGKS	2	0	0	0	0	0	0	0	0	0	0	0	0	3	0	0	0	0	0	0	0	0	0	0	0	0	0	0	0	0	0	0	0	0	0	0	0	0	0	0	0	0	0	0	0	0	0	0
cluster_3199	GVAGIGKS	2	0	0	0	0	0	0	0	0	0	0	0	0	0	0	0	0	0	0	0	0	0	0	0	0	0	0	0	0	0	0	0	0	0	0	0	0	0	0	0	0	0	0	0	0	0	0	0
cluster_3338	GIAGVGKT	1	0	0	0	0	0	0	0	0	0	1	0	42	0	39	33	0	38	1	1	0	1	0	0	0	0	0	0	0	8	0	0	0	0	0	1	0	0	0	0	3	6	0	0	0	1	0	0
cluster_3345	GIAGVGKT	1	0	0	0	0	0	0	0	0	0	1	1	0	0	1	0	0	0	0	1	0	0	0	0	0	0	0	0	0	0	0	0	0	0	0	0	0	0	0	0	0	0	0	0	0	0	0	0
cluster_3346	GIAGVGKT	1	0	0	0	0	0	0	0	0	0	0	0	0	0	11	0	11	0	0	0	0	0	0	0	6	12	22	0	0	0	0	0	0	0	0	0	0	0	0	0	0	0	0	0	0	0	0	0
cluster_3347	GIAGVGKT	1	0	0	0	0	0	0	0	0	106	0	3	74	2	62	44	48	55	57	46	2	20	51	0	1	6	2	0	0	0	0	0	0	0	0	0	4	0	0	0	0	0	0	1	0	0	0	0
cluster_3350	GIAGVGKT	1	0	0	0	0	0	0	0	0	0	1	6	1	9	38	0	0	0	4	31	0	0	0	0	0	32	48	0	2	0	0	0	0	0	0	0	0	0	0	0	0	0	2	0	0	0	0	0
cluster_3362	GIAGVGKT	1	0	0	0	0	0	0	0	0	0	7	0	9	0	1	2	0	0	0	1	0	0	5	0	0	0	0	0	0	0	0	0	0	0	0	0	0	0	0	0	0	0	0	0	0	0	0	0
cluster_3371	GIAGVGKT	1	0	0	0	0	0	0	0	0	66	0	0	0	0	40	0	0	0	0	0	0	0	0	0	0	0	0	0	0	0	0	0	1	0	0	0	0	0	0	0	0	1	0	3	0	0	0	0
cluster_3382	GIAGVGKT	1	0	0	0	0	0	0	0	0	15	26	2	0	6	40	0	8	0	1	6	1	0	1	0	0	0	0	0	0	0	0	0	0	0	0	3	0	0	0	0	0	0	0	2	0	0	0	0
cluster_3428	GVAGIGKS	2	0	0	0	0	0	0	0	0	0	23	0	35	31	58	0	0	0	26	0	0	0	0	12	2	0	2	0	0	0	0	0	0	0	0	0	0	1	0	0	0	0	0	0	0	0	0	0
cluster_3429	GVAGIGKS	2	0	0	0	0	0	0	0	0	0	0	0	33	0	78	46	16	0	5	1	0	6	8	1	0	18	11	0	0	0	0	0	0	0	0	0	5	0	0	0	5	0	0	5	0	0	0	0
cluster_3445	GVAGIGKS	2	0	0	0	0	0	0	0	0	0	0	0	0	0	0	0	0	0	0	0	0	0	0	0	0	0	0	0	0	0	0	0	0	0	0	0	0	0	0	0	0	0	0	0	0	0	0	0
cluster_3455	GVAGIGKS	2	0	0	0	0	0	0	0	0	0	2	0	2	0	4	0	0	0	0	0	0	0	0	1	0	0	0	0	0	0	0	0	0	0	0	1	0	0	0	0	0	0	0	0	0	0	0	0
cluster_3467	GVAGIGKS	2	0	0	0	0	0	0	0	0	0	0	0	0	0	0	0	0	0	0	0	0	0	0	0	0	0	0	0	0	0	0	0	0	0	0	0	0	0	0	0	0	0	0	0	0	0	0	0
cluster_3478	GVAGIGKS	2	0	0	0	0	0	0	0	0	0	3	8	0	2	1	0	0	0	0	0	0	0	2	0	0	0	0	0	0	0	0	1	3	0	0	0	0	0	0	0	0	0	0	0	0	0	0	1
cluster_3479	GVAGIGKS	2	0	0	0	0	0	0	0	0	0	0	0	0	0	19	0	27	9	0	0	0	1	0	4	0	0	0	0	0	0	0	0	0	0	0	0	0	0	0	0	0	0	0	0	0	0	0	0
cluster_3514	GVAGIGKS	2	0	0	0	0	0	0	0	0	0	0	0	0	0	0	0	0	0	0	0	0	0	0	0	0	0	0	0	0	0	0	0	0	0	0	0	0	0	0	0	0	0	0	0	0	0	0	0
cluster_3536	GIAGIGKT	3	0	0	0	0	0	0	0	0	0	0	0	24	0	11	0	0	0	0	0	0	0	0	0	0	0	0	0	2	0	0	0	0	0	0	0	46	0	0	0	0	0	0	0	3	0	0	0
cluster_3546	GIAGIGKT	3	0	0	0	0	0	0	0	0	0	0	0	0	0	52	18	0	0	0	0	0	0	0	0	0	0	0	0	0	0	0	0	0	0	0	0	0	0	0	0	0	0	0	0	0	0	0	0
cluster_3547	GIAGIGKT	3	0	0	0	0	0	0	0	0	0	0	0	10	0	9	0	0	0	0	0	0	0	0	0	0	0	0	0	0	0	0	0	0	0	0	0	0	0	0	0	0	0	0	0	0	0	0	0
cluster_3553	GIAGIGKT	3	0	0	0	0	0	0	0	0	0	0	0	0	0	25	35	0	20	0	0	0	0	0	0	0	0	0	0	0	0	0	0	0	0	0	0	0	0	0	0	0	0	0	0	0	0	0	0
cluster_3556	GIAGIGKT	3	0	0	0	0	0	0	0	0	3	22	0	0	4	40	4	2	2	0	5	0	0	19	0	0	0	0	0	0	0	0	0	0	0	0	0	0	0	0	0	0	0	0	0	0	0	0	0
cluster_3557	GIAGIGKT	3	0	0	0	0	0	0	0	0	0	0	0	0	0	0	0	0	0	0	0	0	0	0	0	0	0	0	0	0	0	0	0	0	0	0	0	0	0	0	0	0	0	0	0	0	0	0	0
cluster_3564	GIAGIGKT	3	0	0	0	0	0	0	0	0	0	1	0	0	1	46	0	0	33	22	2	3	0	0	0	0	0	0	0	0	0	0	0	0	0	0	0	0	0	0	0	0	0	0	0	0	0	0	0
cluster_3572	GIAGIGKT	3	0	0	0	0	0	0	0	0	0	0	0	1	0	0	0	0	0	0	0	0	0	0	0	0	0	0	0	0	0	0	0	0	0	0	0	0	0	0	0	0	0	0	0	0	0	0	0
cluster_3595	GIAGIGKT	3	0	0	0	0	0	0	0	0	0	0	0	0	0	25	31	0	0	0	0	1	0	0	0	0	0	0	0	0	0	0	0	0	0	0	0	0	0	0	0	0	0	0	0	0	0	0	0
cluster_3613	GIAGIGKT	3	0	0	0	0	0	0	0	0	0	0	0	0	0	0	0	0	0	0	0	0	0	0	0	0	0	0	0	0	0	0	0	0	0	0	0	0	0	0	0	0	0	0	0	0	0	0	0
cluster_3633	GIAGIGKT	3	0	0	0	0	0	0	0	0	0	0	0	27	0	25	0	23	0	0	0	0	0	1	0	1	20	17	0	0	0	0	0	0	0	0	0	32	0	0	0	0	0	0	0	0	0	0	0
cluster_3645	GIAGIGKT	3	0	0	0	0	0	0	0	0	18	21	19	2	1	19	25	1	28	40	14	1	1	1	6	11	0	0	0	0	0	0	0	0	0	0	0	0	0	0	0	0	0	0	0	0	0	0	0
cluster_3661	GVAGIGKT	4	0	0	0	0	0	0	0	0	6	5	0	2	2	8	2	5	1	7	0	0	1	0	3	2	1	0	0	0	0	0	0	0	0	0	0	0	0	0	0	0	0	0	0	0	0	0	0
cluster_3662	GVAGIGKT	4	0	0	0	0	0	0	0	0	41	17	0	35	5	21	4	23	0	1	16	0	0	9	0	0	17	24	0	1	3	1	0	0	0	0	0	14	0	0	2	3	8	0	0	1	0	0	1
cluster_3718	GIAGVGKT	1	0	0	0	0	0	0	0	0	0	0	0	0	0	0	56	1	0	0	26	0	0	27	0	0	0	0	0	0	0	0	0	0	0	0	0	0	0	0	0	0	0	0	0	0	0	0	0
cluster_3725	GIAGVGKT	1	0	0	0	0	0	0	0	0	29	12	1	35	15	23	26	22	1	2	1	2	25	9	3	26	2	0	0	0	0	0	0	0	0	0	0	2	0	0	0	0	0	0	0	0	0	0	0
cluster_3728	GIAGVGKT	1	3	0	0	0	1	0	1	6	8	10	6	24	3	27	18	4	17	29	19	0	0	13	5	5	0	0	0	0	0	0	0	0	4	1	10	2	0	2	1	3	9	2	6	1	0	0	1
cluster_3733	GVAGIGKS	2	0	0	0	0	0	0	0	0	0	50	0	0	1	0	31	0	0	0	0	5	20	0	0	0	0	0	0	0	0	0	0	0	0	0	0	0	0	0	0	0	0	0	0	0	0	0	0
cluster_3743	GVAGIGKS	2	0	0	0	0	0	0	0	0	0	0	0	29	0	19	10	0	0	0	0	0	0	0	0	0	13	14	0	0	0	0	0	0	0	0	0	0	0	0	0	0	0	0	0	0	0	0	0
cluster_3751	GVAGIGKS	2	0	0	0	0	0	0	0	0	13	0	1	2	0	0	18	0	0	0	0	1	0	3	0	0	0	0	0	0	1	6	3	0	3	0	0	0	2	1	1	1	11	4	2	5	0	0	9
cluster_3795	GVAGIGKS	2	0	0	0	0	0	0	0	0	0	0	1	22	20	0	28	0	27	7	45	1	0	0	10	0	0	0	0	7	4	6	11	4	1	0	0	0	0	0	3	0	0	1	0	0	0	3	0
cluster_3808	GIAGIGKT	3	0	0	0	0	0	0	0	0	0	0	0	0	0	0	26	1	0	24	0	4	0	0	8	0	0	0	0	0	0	0	0	0	0	0	0	0	0	0	0	0	0	0	0	0	0	0	0
cluster_3817	GIAGIGKT	3	0	0	0	0	0	0	0	0	0	0	0	0	0	0	0	0	0	0	0	0	0	0	0	0	0	0	0	0	0	0	0	0	0	0	0	0	0	0	0	0	0	0	0	0	0	0	0
cluster_3819	GIAGIGKT	3	0	0	0	0	0	0	0	0	0	0	0	0	0	0	6	0	4	0	0	0	0	0	0	0	0	0	0	0	0	0	0	0	0	0	0	0	0	0	0	0	0	0	0	0	0	0	0
cluster_3877	GVAGIGKT	4	0	0	0	0	0	0	0	0	0	0	0	0	0	0	23	0	16	0	0	0	0	0	0	0	0	0	0	0	0	0	0	0	0	0	0	0	0	0	0	0	0	0	0	0	0	0	0
cluster_3879	GVAGIGKT	4	0	0	0	0	0	0	0	0	0	0	4	0	34	0	24	0	0	0	0	0	0	0	0	1	0	0	0	0	0	0	0	0	0	0	0	0	0	0	0	0	0	0	0	0	0	0	0
cluster_3903	GVAGIGKT	4	0	0	0	0	0	0	0	0	0	0	0	0	0	0	17	0	0	0	0	0	0	8	0	12	0	0	0	0	0	0	0	0	0	0	0	0	0	0	0	0	0	0	0	0	0	0	0
cluster_3931	GIAGVGKT	1	1	0	0	0	1	2	2	1	4	5	2	4	3	1	0	9	0	0	2	1	0	0	0	0	12	21	0	0	0	0	1	0	0	0	1	7	0	0	0	0	1	0	2	1	0	0	0
cluster_3950	GVAGIGKS	2	0	0	0	0	0	0	2	0	0	0	0	0	0	0	0	9	0	0	0	0	0	0	0	0	0	0	0	0	0	0	0	0	0	0	0	0	0	0	0	0	0	0	0	0	0	0	0
cluster_3954	GVAGIGKS	2	0	0	0	0	0	0	0	0	0	0	0	0	0	0	0	0	0	0	0	0	0	0	0	0	0	0	0	0	0	0	0	0	0	0	0	0	0	0	0	0	0	0	0	0	0	0	0
cluster_3960	GVAGIGKS	2	0	0	0	0	0	0	0	0	0	0	0	0	0	0	0	3	0	0	0	0	0	0	0	0	0	0	0	0	0	0	0	0	0	0	0	0	0	0	0	0	0	0	0	0	0	0	0
cluster_3971	GVAGIGKS	2	0	0	0	0	0	0	0	0	0	1	0	0	0	0	0	22	0	0	0	1	0	0	7	0	0	0	0	0	0	0	0	0	0	0	0	0	0	0	0	0	0	0	0	0	0	0	0
cluster_3978	GVAGIGKS	2	0	0	0	0	0	0	0	0	0	0	0	0	0	0	0	6	0	0	0	0	0	4	0	0	0	0	0	0	0	0	0	0	0	0	0	0	0	0	0	0	0	0	0	0	0	0	0
cluster_3979	GVAGIGKS	2	0	0	0	0	0	0	0	0	0	11	0	18	0	0	0	21	0	0	4	0	9	0	0	14	0	0	0	0	0	0	0	0	0	0	0	0	0	0	0	0	0	0	0	0	0	0	0
cluster_3981	GVAGIGKS	2	0	0	0	0	0	0	0	0	0	1	0	2	0	2	0	19	0	0	0	0	0	2	0	0	0	0	0	0	1	0	0	0	0	0	0	0	5	0	0	0	1	1	0	0	0	0	0
cluster_3991	GVAGIGKS	2	0	0	0	0	0	0	0	0	5	9	3	8	9	0	0	22	3	1	13	0	8	0	0	0	2	1	0	0	0	0	0	0	0	0	0	0	0	0	0	0	0	0	0	0	0	0	0
cluster_4007	GVAGIGKS	2	0	0	0	0	0	0	0	0	0	0	0	0	0	0	0	0	0	0	0	0	0	0	0	0	0	0	0	0	0	0	0	1	0	0	0	0	0	0	0	0	1	0	0	0	0	0	0
cluster_4013	GVAGIGKS	2	0	0	0	0	0	0	0	0	3	6	0	7	4	1	0	11	0	2	5	1	1	0	0	4	3	8	0	0	0	0	0	0	0	0	0	15	0	0	0	0	0	0	0	0	0	0	0
cluster_4030	GIAGIGKT	3	0	0	0	0	0	0	0	0	0	0	0	0	0	0	0	0	0	0	0	0	0	0	0	0	0	0	0	0	0	0	0	0	0	0	0	0	0	0	0	0	0	0	0	0	0	0	0
cluster_4038	GIAGIGKT	3	0	0	0	0	0	0	0	0	0	0	16	13	0	0	0	14	0	0	0	0	0	0	0	0	0	0	0	0	0	0	0	2	0	0	0	0	3	0	0	0	0	0	0	0	0	0	0
cluster_4040	GIAGIGKT	3	0	0	0	0	0	0	0	0	0	0	0	0	0	0	0	22	0	0	0	0	0	4	0	0	0	0	0	0	0	0	0	0	0	0	0	0	0	0	0	0	0	0	0	0	0	0	0
cluster_4048	GIAGIGKT	3	0	0	0	0	0	0	0	0	0	1	0	2	23	0	18	32	0	0	0	0	0	6	0	8	12	14	0	0	0	0	0	0	0	0	0	0	0	0	0	0	3	0	0	0	0	0	0
cluster_4061	GIAGIGKT	3	0	0	0	1	2	2	1	0	20	14	11	20	5	7	6	24	6	5	5	0	13	16	5	3	11	5	0	0	0	0	0	0	0	0	0	0	0	0	0	0	0	0	0	0	0	0	0
cluster_4065	GIAGIGKT	3	0	0	0	0	0	0	0	0	0	0	0	0	0	0	0	0	0	0	0	0	0	0	0	0	0	0	0	0	0	0	0	0	0	0	0	0	0	0	0	0	0	0	0	0	0	0	0
cluster_4068	GIAGIGKT	3	0	0	0	0	0	0	0	0	0	0	0	0	0	0	8	14	0	0	0	0	0	4	0	0	0	0	0	0	0	0	0	0	0	0	0	0	0	0	0	0	0	0	0	0	0	0	6
cluster_4074	GIAGIGKT	3	0	0	0	0	0	0	0	0	0	0	0	0	0	0	0	6	1	2	0	0	0	0	0	0	0	0	0	0	0	0	0	0	0	0	0	0	0	0	0	0	0	0	0	0	0	0	0
cluster_4078	GIAGIGKT	3	2	0	0	0	3	1	5	0	15	18	8	12	24	0	3	21	5	3	5	1	0	9	4	5	9	11	0	0	0	0	0	0	0	0	0	0	0	0	0	0	2	0	0	0	0	0	0
cluster_4085	GIAGIGKT	3	0	0	0	0	0	0	0	0	0	0	0	0	0	0	0	0	0	0	0	0	0	0	0	0	0	0	0	0	0	0	0	0	0	0	0	0	0	0	0	0	0	0	0	0	0	0	0
cluster_4086	GIAGIGKT	3	0	0	0	0	0	0	0	0	0	1	1	0	0	0	0	1	0	0	0	0	0	2	0	0	1	0	0	0	0	0	0	0	0	0	0	0	0	0	0	0	0	0	0	0	0	0	0
cluster_4087	GIAGIGKT	3	0	0	0	0	0	0	0	0	0	0	0	0	0	0	0	9	0	0	0	0	0	10	0	0	0	0	0	0	0	0	0	0	0	0	0	0	0	0	0	0	0	0	0	0	0	0	0
cluster_4112	GVAGIGKT	4	0	0	0	0	0	0	0	0	0	0	0	0	0	0	0	44	0	0	0	0	0	0	0	0	0	0	0	0	0	0	0	0	0	0	0	0	0	0	0	0	0	0	0	0	0	0	0
cluster_4116	GVAGIGKT	4	0	0	0	0	0	0	0	0	0	0	0	0	0	0	0	3	0	0	0	0	0	0	2	0	0	0	0	0	0	0	0	0	0	0	0	0	0	0	0	0	0	0	0	0	0	0	0
cluster_4127	GIAGVGKT	1	0	0	0	0	0	0	0	0	0	0	0	0	0	0	0	0	11	0	3	0	2	0	0	0	0	0	0	0	0	0	0	0	2	0	0	0	0	0	2	0	0	0	0	0	0	0	2
cluster_4136	GIAGVGKT	1	0	0	0	0	0	0	0	0	0	0	0	0	0	0	0	2	18	0	0	0	0	0	0	0	0	0	0	0	0	0	0	0	0	0	0	0	0	0	0	0	0	0	0	0	0	0	0
cluster_4144	GIAGVGKT	1	0	0	0	0	0	0	0	0	0	44	26	10	39	17	10	13	83	18	49	2	11	12	10	0	2	0	0	0	0	0	0	0	0	0	0	0	0	0	0	0	0	0	0	0	0	0	0
cluster_4145	GIAGVGKT	1	0	0	0	0	0	0	0	0	2	1	0	0	0	0	0	0	3	1	0	0	1	1	0	0	2	4	0	0	0	0	0	0	0	0	0	0	0	0	0	0	0	0	0	0	0	0	0
cluster_4163	GIAGVGKT	1	0	0	0	0	0	0	0	0	30	0	0	0	0	0	0	0	10	2	0	1	0	3	5	0	0	0	0	0	0	0	0	0	0	0	0	0	0	3	0	1	0	0	0	0	0	0	5
cluster_4170	GVAGIGKS	2	0	0	0	0	0	0	0	0	0	0	0	0	15	0	0	0	18	0	39	0	0	13	0	0	0	0	0	0	0	0	0	0	0	0	0	0	0	0	0	0	0	0	0	0	0	0	0
cluster_4174	GVAGIGKS	2	0	0	0	0	0	0	0	0	0	0	0	1	0	0	0	0	21	2	1	0	0	1	0	0	0	0	0	0	0	0	0	0	0	0	0	0	0	0	0	0	0	0	0	0	0	0	0
cluster_4191	GVAGIGKS	2	0	0	0	0	0	0	0	0	0	0	0	0	0	0	0	0	0	0	0	0	0	0	0	0	0	0	0	0	0	0	0	0	0	0	0	0	0	0	0	0	0	0	0	0	0	0	0
cluster_4198	GVAGIGKS	2	0	0	0	0	0	0	0	0	0	12	0	0	0	0	0	0	15	0	0	0	0	0	0	0	0	0	0	0	2	0	0	0	0	0	0	0	0	0	0	0	0	0	0	0	0	0	0
cluster_4202	GVAGIGKS	2	0	0	0	0	0	0	0	0	0	0	0	0	0	0	0	0	0	0	0	0	0	0	0	0	0	0	0	0	0	0	0	0	1	0	0	0	0	0	0	0	0	0	0	0	0	0	0
cluster_4235	GVAGIGKS	2	0	0	0	0	0	0	0	0	0	0	0	0	0	0	0	0	10	0	0	0	0	0	0	0	0	0	0	0	0	0	0	0	0	0	0	0	0	0	0	0	0	0	0	0	0	0	0
cluster_4242	GIAGIGKT	3	0	0	0	0	0	0	0	0	0	0	0	0	5	0	0	0	19	1	0	0	0	0	0	0	0	0	0	0	0	0	0	0	0	0	0	0	0	0	0	0	0	0	0	0	0	0	0
cluster_4269	GIAGIGKT	3	0	0	0	0	0	0	0	0	0	0	0	0	0	0	0	0	0	0	0	0	0	0	0	0	0	0	0	0	0	0	0	0	0	0	0	0	0	0	0	0	0	0	0	0	0	0	0
cluster_4270	GIAGIGKT	3	0	0	0	0	0	0	0	0	0	0	0	0	0	0	0	0	0	0	0	0	0	0	0	0	0	0	0	0	0	0	0	0	0	0	0	0	0	0	0	0	0	0	0	0	0	0	0
cluster_4285	GIAGIGKT	3	1	1	1	0	5	0	4	5	16	0	0	0	17	0	0	0	12	0	0	0	0	4	2	0	0	0	0	1	0	0	0	0	0	0	0	0	0	0	0	0	0	1	0	0	0	0	4
cluster_4290	GIAGIGKT	3	0	0	0	0	0	0	0	0	0	0	0	0	0	0	0	0	0	0	0	0	0	0	0	0	0	0	0	0	0	0	0	0	0	0	0	0	0	0	0	0	0	0	0	0	0	0	0
cluster_4293	GIAGIGKT	3	0	0	0	0	0	0	0	0	0	0	0	0	0	0	0	0	14	0	0	0	0	0	0	0	0	0	0	1	0	0	0	0	0	0	0	0	0	0	0	0	0	0	0	0	0	0	0
cluster_4377	GIAGVGKT	1	0	0	0	0	0	0	0	0	0	0	0	0	0	0	0	1	0	36	44	1	0	14	0	0	44	32	0	2	1	0	0	0	0	0	0	0	0	0	0	0	0	0	1	0	0	0	0
cluster_4431	GVAGIGKS	2	0	0	0	0	0	0	0	0	0	0	0	0	0	0	0	0	0	0	0	0	0	0	0	0	0	0	0	0	0	0	0	0	0	0	0	0	0	0	0	0	0	0	0	0	0	0	0
cluster_4439	GVAGIGKS	2	0	0	0	0	0	0	0	0	0	0	0	0	0	0	0	0	0	13	0	0	0	0	0	0	0	0	0	0	0	0	0	0	0	0	0	0	0	0	0	0	0	0	0	0	0	0	0
cluster_4466	GVAGIGKS	2	0	0	0	0	0	0	0	0	12	0	22	1	0	0	13	0	0	11	0	0	0	0	0	0	0	0	0	0	1	0	2	0	0	2	0	0	0	2	0	0	0	0	0	0	0	0	0
cluster_4480	GVAGIGKS	2	0	0	0	0	0	0	0	0	0	0	0	0	4	0	0	0	0	21	4	0	18	2	0	0	0	0	0	0	0	0	0	0	0	0	0	0	0	0	0	0	0	0	0	0	0	0	0
cluster_4627	GIAGVGKT	1	0	0	0	0	0	0	0	0	0	0	0	0	0	0	0	0	1	0	4	0	1	0	0	0	0	0	0	0	0	0	0	0	0	0	0	0	0	0	0	0	0	0	0	0	0	0	0
cluster_4661	GVAGIGKS	2	0	0	0	0	0	0	0	0	0	0	0	0	0	0	0	0	0	0	0	0	0	0	0	0	0	0	0	0	0	0	0	0	0	0	0	0	0	0	0	0	0	0	0	0	0	0	0
cluster_4673	GVAGIGKS	2	0	0	0	0	0	0	0	0	0	0	0	0	0	0	0	0	0	0	9	0	0	0	0	0	0	0	0	0	0	0	0	0	0	0	0	0	0	0	0	0	0	0	0	0	0	0	0
cluster_4675	GVAGIGKS	2	0	0	0	0	0	0	0	0	0	1	1	0	0	1	1	0	0	0	1	0	1	0	0	0	0	0	0	0	0	0	0	0	0	0	0	0	0	0	0	0	0	0	0	0	0	0	0
cluster_4800	GVAGIGKT	4	0	0	0	0	0	0	0	0	0	0	0	0	0	0	0	0	0	28	11	0	0	0	0	0	34	25	0	0	0	0	0	0	0	0	0	0	0	0	0	0	0	0	0	0	0	0	5
cluster_4809	GVAGIGKT	4	0	0	0	0	0	0	0	0	0	0	0	0	0	0	0	0	0	26	31	0	0	0	0	0	35	39	0	0	0	0	0	0	0	0	0	0	0	0	0	0	0	0	0	0	0	0	14
cluster_4820	GIAGVGKT	1	0	0	0	0	0	0	0	0	0	0	0	41	0	25	0	0	22	0	0	4	0	0	0	8	12	18	0	0	0	0	0	0	0	0	0	0	0	0	0	0	0	0	0	0	0	0	0
cluster_4833	GIAGIGKT	3	0	0	0	0	0	0	0	0	0	0	0	0	0	0	0	0	0	0	0	3	0	0	0	0	0	0	0	0	0	0	0	1	0	0	0	0	0	0	0	0	0	0	0	0	0	0	0
cluster_4859	GIAGVGKT	1	0	0	0	0	0	0	0	0	0	0	0	0	0	0	0	0	0	0	0	0	0	0	0	0	0	0	0	0	0	0	0	0	0	1	0	0	0	0	0	0	0	0	0	0	0	0	0
cluster_4860	GIAGVGKT	1	0	0	0	0	0	0	0	0	0	0	0	0	0	0	0	0	1	0	0	0	2	0	0	0	0	0	0	0	0	0	0	0	0	0	0	0	0	0	0	0	0	0	0	0	0	0	0
cluster_4872	GVAGIGKS	2	0	0	0	0	0	0	0	0	0	0	0	0	0	0	0	0	0	0	0	0	24	0	0	0	0	0	0	0	0	3	5	0	0	0	0	0	0	0	0	0	0	0	0	0	0	0	0
cluster_4873	GVAGIGKS	2	0	0	0	0	0	0	0	0	0	0	0	0	0	0	0	0	0	0	0	0	0	0	0	0	0	0	0	0	0	0	0	0	0	0	0	0	0	0	0	0	0	0	0	0	0	0	0
cluster_4882	GVAGIGKS	2	0	0	13	0	0	0	0	0	43	1	1	1	0	0	15	10	0	1	0	0	12	23	8	10	0	1	0	0	2	0	0	0	4	0	4	0	3	1	0	2	0	1	1	10	0	0	0
cluster_4887	GVAGIGKS	2	0	0	0	0	0	0	0	0	0	0	0	0	0	0	0	0	0	0	0	0	0	0	0	0	0	0	0	0	0	0	0	0	0	0	0	0	0	0	0	0	0	0	0	0	0	0	0
cluster_4914	GVAGIGKS	2	0	0	0	0	0	0	0	0	0	0	1	0	0	0	0	0	0	0	0	0	0	0	0	0	0	0	0	0	0	0	0	0	0	0	0	0	0	0	0	0	0	0	0	0	0	0	0
cluster_4930	GVAGIGKS	2	0	0	0	0	0	0	0	0	0	0	0	0	0	0	0	0	0	0	0	0	0	0	0	0	0	0	0	0	0	0	0	0	0	0	0	0	0	0	0	0	0	0	0	0	0	0	0
cluster_4946	GIAGIGKT	3	0	0	0	0	0	0	0	0	0	0	0	0	0	0	0	0	0	0	0	0	16	0	0	0	0	0	0	0	0	0	0	0	0	0	0	0	0	0	0	0	0	0	0	0	0	0	0
cluster_4951	GIAGIGKT	3	0	0	0	0	0	0	0	0	0	1	0	0	0	0	0	0	0	0	2	0	3	1	0	0	0	0	0	0	0	0	0	0	0	0	0	8	0	0	0	0	0	0	0	0	0	0	0
cluster_4968	GIAGIGKT	3	0	0	0	0	0	0	0	0	1	0	0	24	0	32	19	0	0	0	0	0	9	0	0	0	32	29	0	0	0	0	0	0	0	0	0	0	0	0	0	0	0	0	0	0	0	0	0
cluster_4990	GIAGIGKT	3	0	0	0	0	0	0	0	0	0	0	0	0	0	0	0	0	0	0	0	0	2	0	0	0	0	0	0	0	0	0	0	0	0	0	0	0	0	0	0	0	0	0	0	0	0	0	0
cluster_5122	GVAGIGKS	2	0	0	0	0	0	0	0	0	9	0	0	0	0	0	0	0	0	0	0	0	0	10	0	0	0	0	0	0	0	0	0	0	0	0	0	0	0	0	0	0	0	0	0	0	0	0	0
cluster_5166	GVAGIGKS	2	0	0	0	0	0	0	0	0	0	0	0	0	0	0	0	0	0	0	0	0	0	0	0	0	0	0	0	0	0	0	0	0	0	0	0	0	0	0	0	0	0	0	0	0	0	0	0
cluster_5182	GVAGIGKS	2	0	0	0	0	0	0	0	0	0	0	0	0	0	0	0	0	0	0	0	0	0	0	0	0	0	0	0	0	0	0	0	0	0	0	0	0	4	1	0	0	0	2	0	2	0	0	0
cluster_5186	GVAGIGKS	2	0	0	0	0	0	0	0	0	0	0	15	0	0	0	0	0	0	0	0	0	0	10	0	0	0	0	0	0	0	0	0	0	0	0	0	0	0	0	0	0	0	0	0	0	0	0	0
cluster_5228	multiple	multiple	0	0	0	0	0	0	0	0	4	1	8	5	1	1	1	0	0	1	0	0	0	10	2	0	7	13	0	0	0	0	0	0	0	0	0	0	0	0	0	0	0	0	0	0	0	0	0
cluster_5237	GIAGIGKT	3	0	0	0	0	0	0	0	0	5	0	0	0	0	0	0	0	0	0	0	0	0	3	0	0	0	0	0	0	0	0	1	0	0	0	1	0	0	0	0	0	0	0	0	0	0	0	0
cluster_5249	GIAGIGKT	3	0	0	0	0	0	0	0	0	0	0	0	0	0	0	0	0	0	0	0	0	16	20	0	0	19	17	0	0	0	2	0	7	0	0	0	0	0	0	4	0	0	0	0	9	0	0	0
cluster_5252	GIAGIGKT	3	0	0	0	0	0	0	0	0	0	0	0	3	0	5	16	0	0	0	0	0	0	8	1	0	11	6	0	0	0	0	0	0	0	0	0	0	0	0	0	0	0	0	0	0	0	0	0
cluster_5283	GIAGIGKT	3	0	0	0	0	0	0	0	0	0	1	0	0	0	0	0	1	0	0	2	0	0	13	2	0	5	2	0	0	0	0	0	0	0	0	0	0	0	0	0	0	0	0	0	0	0	0	0
cluster_5287	GIAGIGKT	3	0	0	0	0	0	0	0	0	0	0	0	0	0	0	0	0	0	0	0	0	0	0	0	0	0	0	0	0	0	0	0	0	0	0	0	0	0	0	0	0	0	0	0	0	0	0	0
cluster_5292	GIAGIGKT	3	0	0	0	0	0	0	0	0	0	0	0	0	0	0	0	0	0	0	0	0	0	7	0	0	0	0	0	0	0	5	0	0	1	0	0	10	0	0	0	0	0	0	0	0	0	0	0
cluster_5301	GIAGIGKT	3	0	0	0	0	0	0	0	0	0	0	0	0	0	0	0	0	0	0	0	0	0	6	0	0	0	0	0	0	0	0	0	0	0	0	0	0	0	0	0	0	0	0	0	0	0	0	0
cluster_5312	GIAGIGKT	3	0	0	0	0	0	0	0	0	0	0	0	2	1	2	0	0	0	0	2	0	1	12	0	0	0	0	0	0	0	0	1	0	0	0	0	0	0	0	0	0	0	0	0	0	0	0	0
cluster_5322	GIAGIGKT	3	5	4	4	11	13	12	7	7	0	0	0	0	0	1	0	20	0	0	0	0	1	11	0	0	0	0	0	0	2	0	0	0	0	0	0	12	0	0	0	1	0	0	0	2	0	0	11
cluster_5326	GIAGIGKT	3	0	0	0	0	0	0	0	0	0	0	0	0	0	0	0	0	0	0	0	0	0	1	0	1	1	2	0	0	0	0	0	0	0	0	0	0	0	0	0	0	0	0	0	0	0	0	0
cluster_5347	GVAGIGKT	4	0	0	0	0	0	0	0	0	0	0	0	0	2	0	0	1	0	0	0	0	0	14	0	16	0	0	0	0	0	0	0	0	0	0	0	0	0	0	0	0	0	0	0	0	0	0	0
cluster_5367	GVAGIGKT	4	0	0	0	0	0	0	0	0	0	0	0	0	0	0	11	0	0	0	0	0	0	8	0	13	0	0	0	0	0	0	0	0	0	0	0	0	0	0	0	0	0	0	0	0	0	0	0
cluster_5385	GIAGVGKT	1	0	0	0	0	0	0	0	0	0	0	0	0	0	0	0	0	0	0	0	0	0	0	0	0	0	0	0	0	0	0	0	0	0	0	0	0	0	0	0	0	0	0	0	0	0	0	0
cluster_5410	GVAGIGKS	2	0	0	0	0	0	0	0	0	18	6	4	40	0	1	3	8	4	4	5	3	1	37	25	0	0	0	0	1	0	0	0	0	0	0	0	0	0	0	0	0	0	0	0	0	0	0	3
cluster_5411	GVAGIGKS	2	0	0	2	0	0	0	0	0	0	0	0	52	0	41	0	1	0	0	0	0	0	26	18	0	0	0	0	0	0	0	0	0	0	0	0	0	0	0	0	0	0	0	0	0	0	0	0
cluster_5416	GVAGIGKS	2	0	0	1	0	0	0	0	0	0	0	0	0	0	0	0	2	0	0	0	0	0	1	0	0	0	0	0	0	0	0	9	1	0	1	2	20	0	1	0	0	9	0	0	1	1	0	1
cluster_5425	GVAGIGKS	2	0	0	0	0	0	0	0	0	0	0	0	0	0	0	4	0	0	0	0	0	0	15	10	0	0	0	0	0	0	0	0	0	0	0	0	0	0	0	0	0	0	0	0	0	0	0	0
cluster_5444	GVAGIGKS	2	0	0	0	0	0	0	0	0	4	21	5	23	0	20	0	0	4	15	19	0	3	12	9	0	0	0	0	1	0	1	0	0	1	0	1	0	0	0	0	0	0	0	0	0	1	0	4
cluster_5445	GVAGIGKS	2	0	0	0	0	0	0	0	0	0	0	0	0	0	0	0	0	0	0	0	0	0	0	8	0	0	0	0	0	0	0	0	0	0	0	0	0	0	0	0	0	0	0	0	0	0	0	0
cluster_5451	GVAGIGKS	2	0	0	0	0	0	0	0	0	0	0	1	5	0	2	0	0	0	0	0	0	3	6	2	2	0	0	0	0	0	0	0	0	0	1	1	0	0	0	0	0	1	1	0	2	0	1	0
cluster_5456	GVAGIGKS	2	0	0	0	0	0	0	0	0	41	36	0	55	0	47	2	0	0	42	0	0	0	0	11	22	0	0	0	0	0	0	9	0	0	0	2	0	0	0	5	0	0	3	0	0	0	0	2
cluster_5465	GIAGIGKT	3	4	0	1	2	3	2	21	1	40	70	53	42	55	67	50	42	47	45	44	3	27	41	20	14	26	26	0	2	2	5	1	2	2	2	5	44	4	2	0	2	7	1	4	4	0	0	24
cluster_5499	GIAGIGKT	3	0	0	0	0	0	0	0	0	0	8	0	7	0	11	6	4	0	0	0	1	1	6	8	0	0	0	0	0	0	0	0	0	0	0	0	0	0	0	0	0	0	0	0	1	0	0	0
cluster_5501	GIAGIGKT	3	0	0	0	0	0	0	0	0	11	9	5	9	9	3	10	4	4	3	5	1	7	3	7	9	11	14	0	0	0	0	0	0	0	0	0	0	0	0	0	0	0	0	0	0	0	0	0
cluster_5527	GVAGIGKT	4	0	0	0	0	0	0	0	0	0	0	0	0	0	0	0	0	0	24	0	0	0	9	11	0	0	0	0	0	0	0	0	0	0	0	0	0	0	0	0	0	0	0	0	0	0	0	0
cluster_5538	GVAGIGKT	4	0	0	0	0	0	0	0	0	0	9	0	0	0	0	3	0	3	1	0	0	0	0	2	0	0	0	0	0	0	0	0	0	0	0	0	0	0	0	0	0	0	0	0	0	0	0	0
cluster_5539	GVAGIGKT	4	0	0	0	0	0	0	0	0	0	0	0	0	0	0	0	0	0	0	0	0	0	0	1	0	0	0	0	0	0	0	0	0	0	0	0	0	0	0	0	0	0	0	0	0	0	0	0
cluster_5551	GIAGVGKT	1	0	0	0	0	0	0	0	0	0	0	0	0	0	0	0	0	0	0	0	0	0	0	0	0	0	0	0	0	0	0	0	0	0	0	0	0	0	0	0	0	0	0	0	0	0	0	0
cluster_5557	GIAGVGKT	1	0	0	0	0	0	0	0	0	2	0	0	0	9	0	24	0	0	0	0	0	0	0	0	20	14	5	0	0	0	0	2	0	0	2	0	24	0	0	0	1	1	0	4	0	0	0	0
cluster_5563	GIAGVGKT	1	0	0	0	0	0	0	0	0	2	0	0	0	0	0	0	0	0	0	0	0	0	1	1	1	4	0	0	0	0	0	0	0	0	0	0	0	0	0	0	0	0	0	0	0	0	0	0
cluster_5571	GIAGVGKT	1	0	0	1	0	0	0	0	0	0	0	3	6	0	0	1	0	4	0	0	0	2	1	10	16	1	0	0	0	0	0	0	0	0	0	0	0	0	0	0	0	0	0	0	0	0	0	0
cluster_5573	GVAGIGKS	2	0	0	0	0	0	0	0	0	0	0	0	0	0	0	0	0	0	0	0	0	0	15	0	23	0	0	0	0	0	0	0	0	0	0	0	0	0	0	0	0	0	0	0	0	0	0	0
cluster_5579	GVAGIGKS	2	1	1	0	1	0	0	0	0	7	4	0	1	0	0	0	3	0	0	7	0	0	2	0	19	0	0	0	1	0	0	0	1	0	0	0	3	0	0	1	0	1	1	0	0	0	0	0
cluster_5580	GVAGIGKS	2	0	0	0	0	0	0	0	0	0	17	0	11	0	12	0	0	0	3	0	0	7	0	3	22	0	4	0	0	0	0	0	0	0	0	0	10	0	0	0	3	0	0	0	2	0	0	1
cluster_5581	GVAGIGKS	2	8	0	6	0	0	0	0	0	63	47	82	36	5	21	4	20	31	43	11	0	1	10	19	45	19	18	0	0	4	0	1	2	0	2	0	0	1	0	4	0	0	3	0	1	0	0	4
cluster_5582	GVAGIGKS	2	0	0	0	0	0	0	0	0	18	0	0	23	0	17	1	16	0	0	0	0	0	0	0	35	21	30	0	0	2	3	4	5	9	0	0	0	0	0	0	0	3	0	0	0	0	0	0
cluster_5590	GVAGIGKS	2	0	0	0	0	0	0	0	0	11	12	0	13	0	1	0	14	0	0	9	0	0	6	0	13	0	0	0	0	0	0	0	0	2	0	0	0	0	0	0	0	0	0	0	0	0	0	4
cluster_5592	GVAGIGKS	2	0	0	0	0	0	0	0	0	0	0	0	18	4	20	0	0	0	0	3	2	0	0	0	21	0	0	0	0	0	0	0	0	0	0	0	0	0	0	0	0	0	0	0	0	0	0	0
cluster_5598	GVAGIGKS	2	0	0	0	0	0	0	0	0	0	0	0	0	0	0	0	0	0	0	0	0	0	0	0	30	0	0	0	0	0	2	0	0	0	2	0	1	0	0	2	0	0	0	3	0	0	0	0
cluster_5599	GVAGIGKS	2	0	0	0	0	0	0	0	0	0	0	16	0	0	0	0	0	0	0	0	0	0	0	0	7	11	12	0	0	0	0	0	0	0	0	0	0	0	0	0	0	0	0	0	0	0	0	0
cluster_5600	GVAGIGKS	2	0	0	0	0	0	0	0	0	0	0	0	0	0	0	0	3	5	0	0	1	2	3	1	13	35	31	0	0	0	0	0	0	0	0	0	0	0	0	0	0	0	0	0	0	0	0	0
cluster_5604	GVAGIGKS	2	0	0	0	0	0	0	0	0	0	0	0	0	0	1	0	0	0	0	0	0	0	0	0	2	1	0	0	0	0	0	0	0	0	0	0	0	0	0	0	0	0	0	0	0	0	0	0
cluster_5617	GVAGIGKS	2	0	0	0	0	0	0	0	0	0	0	0	0	0	0	0	0	0	0	0	0	0	0	0	1	0	0	0	0	0	0	0	0	0	0	0	0	0	0	0	0	0	0	0	0	0	0	0
cluster_5622	GVAGIGKS	2	0	0	2	0	0	0	0	0	0	0	0	20	5	0	1	0	0	6	17	0	0	4	0	4	2	6	1	4	6	6	0	0	5	0	0	0	0	3	1	2	0	0	0	4	4	0	8
cluster_5628	GVAGIGKS	2	0	0	0	0	0	0	0	0	0	0	0	0	0	0	0	0	0	0	0	0	0	0	0	2	0	3	0	0	0	0	0	0	0	0	0	0	0	0	0	0	0	0	0	0	0	0	0
cluster_5645	GIAGIGKT	3	0	0	0	0	0	0	0	0	0	0	0	0	1	0	0	0	10	0	0	0	0	0	0	14	0	0	0	0	0	0	0	0	0	0	0	0	0	0	0	0	0	0	0	0	0	0	1
cluster_5646	GIAGIGKT	3	0	0	0	0	0	0	0	0	0	0	0	0	0	0	0	0	0	0	0	1	0	0	0	25	0	0	0	0	0	0	0	0	0	0	0	0	0	0	0	0	0	0	0	0	0	0	0
cluster_5661	GIAGIGKT	3	0	0	0	0	0	0	0	0	0	0	0	0	0	0	0	0	0	0	0	0	0	0	0	10	19	19	0	0	0	0	0	0	0	0	0	0	0	0	0	0	0	0	0	0	0	0	0
cluster_5666	GIAGIGKT	3	0	0	0	0	0	0	0	0	15	66	36	30	18	0	0	25	23	32	15	0	28	8	10	29	15	24	0	0	0	0	0	0	0	0	0	0	0	0	0	0	0	0	0	0	0	0	0
cluster_5668	GIAGIGKT	3	0	0	0	0	0	0	0	0	17	13	0	15	0	4	21	0	0	12	0	0	7	1	0	11	14	16	0	0	0	0	0	0	0	0	0	0	0	0	0	0	0	0	0	0	0	0	0
cluster_5674	GIAGIGKT	3	0	0	0	0	0	0	0	0	1	20	16	15	8	16	17	14	8	0	8	0	9	3	3	23	0	0	0	0	0	0	0	0	1	0	0	0	0	1	0	0	0	0	0	0	0	0	0
cluster_5685	GIAGIGKT	3	0	0	0	0	0	0	0	0	23	12	23	0	0	0	0	1	21	20	0	0	0	5	0	11	0	0	1	0	0	0	0	1	0	0	6	0	4	0	0	2	6	0	0	3	0	1	21
cluster_5687	GIAGIGKT	3	0	0	0	0	0	0	0	0	0	0	0	0	0	0	0	0	0	0	0	0	15	0	0	18	0	0	0	0	0	0	0	0	0	0	0	0	0	0	0	0	0	0	0	1	0	0	0
cluster_5702	GIAGIGKT	3	0	0	0	0	0	0	0	0	0	5	0	0	16	7	4	3	6	0	11	0	0	3	0	11	2	0	0	0	0	3	0	0	0	0	0	0	0	0	0	0	0	0	0	0	0	0	0
cluster_5728	GVAGIGKT	4	4	5	3	0	4	2	2	5	2	1	0	18	5	13	0	0	0	4	8	0	0	6	0	17	9	5	0	1	0	0	0	0	0	0	0	2	0	0	0	0	1	1	1	1	0	0	2
cluster_5730	GVAGIGKT	4	0	0	0	0	0	0	0	0	0	0	0	10	0	2	0	0	0	0	1	0	0	21	4	14	0	0	0	0	0	0	0	0	0	0	0	0	0	0	0	0	0	0	0	0	0	0	0
cluster_5734	GVAGIGKT	4	0	0	0	0	0	0	0	0	0	0	0	0	0	0	0	0	0	0	0	0	0	0	0	19	0	0	0	0	0	0	0	0	0	0	0	0	0	0	0	0	0	0	0	0	0	0	0
cluster_5753	GIAGVGKT	1	0	0	0	0	0	0	0	0	1	4	1	4	3	4	2	4	1	2	3	0	2	0	0	0	3	2	0	0	0	0	0	0	1	0	1	0	0	0	0	0	0	0	0	2	0	0	0
cluster_5755	GIAGVGKT	1	0	0	0	0	0	0	0	0	1	48	0	0	37	0	0	0	0	0	0	0	0	0	0	0	17	24	0	0	0	0	0	0	0	0	0	0	0	0	0	0	0	0	0	0	0	0	0
cluster_5757	GIAGVGKT	1	0	0	0	0	0	0	0	0	0	0	2	0	0	0	0	0	0	0	0	0	0	0	0	0	3	2	0	0	0	0	0	0	0	0	0	0	0	0	0	0	0	0	0	0	0	0	0
cluster_5764	GIAGVGKT	1	0	0	0	0	0	0	0	0	0	0	95	36	65	26	92	27	26	0	42	0	0	25	8	0	33	20	0	0	0	0	0	0	0	0	0	0	0	0	0	0	0	0	0	0	0	0	0
cluster_5792	GVAGIGKS	2	0	0	0	0	0	0	0	0	13	8	0	30	19	15	1	34	5	16	3	0	2	7	5	14	22	31	0	0	0	0	0	0	0	0	0	54	0	1	1	0	1	0	0	0	0	0	1
cluster_5812	GVAGIGKS	2	0	0	0	0	0	0	0	0	0	0	0	11	0	0	0	0	0	0	0	0	2	1	3	0	5	2	0	0	0	1	0	0	0	0	0	2	1	1	0	0	3	0	0	0	0	0	0
cluster_5815	GVAGIGKS	2	0	0	0	0	0	0	0	0	35	53	36	0	0	0	0	16	17	38	1	0	0	0	0	26	42	36	0	0	0	0	4	0	0	3	0	0	0	0	0	1	0	18	0	0	0	0	0
cluster_5817	GVAGIGKS	2	0	0	0	0	0	0	0	0	0	0	0	0	0	0	0	0	0	0	0	0	0	0	0	6	11	12	0	0	0	0	0	0	0	0	0	0	0	0	0	0	0	0	0	0	0	0	0
cluster_5826	GVAGIGKS	2	0	0	0	0	0	0	0	0	0	2	0	3	3	0	0	1	0	0	0	0	0	1	3	0	8	4	0	0	0	0	0	0	0	0	0	0	0	0	0	0	0	0	0	0	0	0	0
cluster_5832	GVAGIGKS	2	0	0	0	0	0	0	0	0	0	24	0	0	1	0	22	0	0	0	0	0	0	1	1	0	46	38	0	0	0	0	0	0	0	0	0	0	0	0	0	0	0	0	0	0	0	0	0
cluster_5836	GVAGIGKS	2	0	0	0	0	0	0	0	0	0	0	0	0	0	0	0	26	0	0	10	0	0	0	0	11	12	15	0	0	0	0	0	0	0	0	0	0	0	0	0	0	0	0	0	0	0	0	1
cluster_5837	GVAGIGKS	2	0	0	0	0	0	0	0	0	0	0	0	0	0	0	0	0	0	0	0	0	0	0	0	0	1	0	0	0	0	0	0	0	0	0	0	0	0	0	0	0	0	0	0	0	0	0	0
cluster_5845	multiple	multiple	0	0	0	0	0	0	0	0	1	0	0	0	0	0	0	0	0	0	0	0	1	0	0	0	31	19	0	0	0	0	0	0	0	0	0	0	0	0	0	0	0	0	0	0	0	0	0
cluster_5847	GIAGIGKT	3	0	0	0	0	0	0	0	0	0	0	0	0	17	0	0	0	0	0	0	0	0	0	0	0	30	19	0	0	0	0	0	0	0	0	0	0	0	0	0	0	2	0	0	0	0	0	0
cluster_5862	GIAGIGKT	3	0	0	0	0	0	0	0	0	13	29	41	27	27	32	27	12	19	22	28	1	4	24	1	10	15	17	0	0	0	0	0	0	0	0	0	0	0	0	0	0	0	0	0	0	0	0	0
cluster_5871	GIAGIGKT	3	0	0	0	0	0	0	0	0	0	0	0	0	0	0	0	0	3	0	0	0	0	0	0	7	11	9	0	0	0	0	0	0	0	0	0	0	0	0	0	0	0	0	0	0	0	0	0
cluster_5904	GIAGIGKT	3	0	0	0	0	0	0	0	0	10	5	9	8	8	5	2	5	4	5	2	0	1	9	1	9	9	7	0	0	2	0	0	0	0	1	0	0	0	0	0	0	2	0	0	0	0	0	8
cluster_5906	GIAGIGKT	3	0	0	0	0	0	0	0	0	0	7	8	24	0	0	4	9	3	22	1	0	7	3	2	1	20	11	0	0	0	0	0	0	0	0	0	0	0	0	0	0	0	0	0	0	0	0	0
cluster_5920	GIAGIGKT	3	4	1	0	6	6	8	5	4	0	0	0	0	0	0	0	0	0	0	0	0	0	0	0	1	26	27	0	0	0	0	0	0	0	0	0	0	0	0	0	0	0	0	0	0	0	0	0
cluster_5921	GVAGIGKT	4	0	0	0	0	0	0	0	0	0	0	0	0	0	0	0	0	0	0	0	0	0	0	0	0	0	0	0	0	0	0	0	0	0	0	0	0	0	0	0	0	0	0	0	0	0	0	0
cluster_5928	GVAGIGKT	4	0	0	0	0	0	0	0	0	3	0	1	0	1	0	0	0	7	10	0	0	0	0	0	1	5	4	0	0	1	0	0	0	0	0	0	3	0	0	0	0	0	0	0	0	0	0	2
cluster_5958	GIAGVGKT	1	0	0	0	0	0	0	0	0	0	0	0	0	0	0	0	0	0	0	0	0	0	0	0	0	3	8	0	0	0	0	0	0	0	1	0	0	2	0	0	0	1	0	0	0	0	0	0
cluster_5968	GIAGVGKT	1	0	0	0	0	0	0	0	0	0	0	0	0	0	0	0	0	0	0	1	0	0	1	0	0	1	3	0	0	0	0	0	0	0	0	0	0	0	0	0	0	0	0	0	0	0	0	0
cluster_6004	GVAGIGKS	2	0	0	0	0	0	0	0	0	0	0	1	0	0	0	0	0	0	0	0	0	0	0	0	0	2	9	0	0	0	0	0	0	1	0	0	0	0	1	0	0	0	0	0	0	1	0	0
cluster_6008	GVAGIGKS	2	0	0	0	0	0	0	0	0	0	0	0	0	0	0	0	0	0	0	17	0	0	0	0	12	19	19	0	0	0	0	0	0	0	0	0	0	0	0	0	0	0	0	0	0	0	3	0
cluster_6021	GVAGIGKS	2	0	0	0	0	0	0	0	0	0	20	1	0	0	0	0	0	0	0	0	0	0	0	0	0	29	22	0	0	0	0	0	0	0	0	0	0	0	0	0	0	0	0	0	0	0	0	0
cluster_6040	GVAGIGKS	2	0	1	2	4	0	0	0	0	20	18	0	0	1	0	0	0	0	0	0	0	0	0	10	0	9	12	0	0	0	0	0	0	0	0	0	0	1	0	0	0	0	1	0	0	0	0	0
cluster_6048	GVAGIGKS	2	0	0	0	0	0	0	0	0	11	0	11	0	9	0	0	0	3	0	6	0	0	0	0	0	11	7	0	0	0	0	0	0	0	0	0	0	0	0	0	0	0	0	0	0	0	0	0
cluster_6061	GIAGIGKT	3	0	0	0	0	0	0	0	0	0	0	0	37	23	30	0	0	0	0	0	0	0	0	0	0	36	26	0	0	0	0	0	0	0	0	0	0	0	0	0	0	0	0	0	0	0	0	0
cluster_6064	GIAGIGKT	3	0	0	0	0	0	0	0	0	2	0	5	1	2	2	0	0	0	1	0	0	0	0	1	0	0	2	0	0	0	0	0	0	0	0	0	0	0	0	0	0	0	0	0	0	0	0	0
cluster_6066	GIAGIGKT	3	0	0	0	0	0	0	0	0	0	0	0	0	1	0	0	0	1	0	0	0	0	0	0	0	1	3	0	3	0	0	1	0	0	0	1	0	3	0	3	0	0	0	0	0	0	0	4
cluster_6072	GIAGIGKT	3	1	0	0	1	1	1	3	1	11	6	8	11	6	12	10	2	7	4	5	1	2	5	0	2	1	12	0	0	0	1	0	0	0	0	0	6	1	0	0	0	0	0	4	0	0	0	2
cluster_6073	GIAGIGKT	3	0	0	0	0	0	0	0	0	10	0	13	6	4	2	0	0	15	0	5	0	3	0	0	0	11	17	0	0	0	0	0	1	0	0	0	0	1	0	0	0	0	0	2	0	0	0	0
cluster_6086	GIAGIGKT	3	0	0	0	0	0	0	0	0	0	0	0	0	0	0	0	0	0	0	0	0	0	0	0	0	0	0	0	0	0	0	0	0	0	0	0	0	0	0	0	0	0	0	0	0	0	0	0
cluster_6109	GIAGIGKT	3	0	0	0	0	0	0	0	0	0	0	0	0	0	0	0	0	0	0	0	0	0	0	0	0	0	0	0	0	0	0	0	0	0	0	0	0	0	0	0	0	0	0	0	0	0	0	0
cluster_6114	GIAGIGKT	3	0	0	0	0	0	0	0	0	0	0	0	35	0	0	0	0	0	0	0	0	0	0	0	0	32	38	0	0	0	0	0	0	0	0	0	0	0	0	0	0	0	0	0	0	0	0	1
cluster_6146	GVAGIGKT	4	0	0	0	0	0	0	0	0	2	4	3	3	2	7	3	3	0	2	4	1	1	1	0	0	4	4	0	0	0	0	0	0	0	0	0	0	0	0	0	0	0	0	0	0	0	0	0
cluster_6147	GVAGIGKT	4	0	0	0	0	0	0	0	0	0	0	0	0	0	15	0	0	0	0	3	0	2	11	0	0	44	32	0	0	0	0	0	0	1	0	0	0	0	0	0	0	0	0	0	0	0	0	0
cluster_6149	GVAGIGKT	4	0	0	0	0	0	0	0	0	0	0	10	1	22	0	10	6	0	0	0	2	2	2	0	0	18	19	0	0	0	0	0	0	0	0	0	0	0	0	0	0	0	0	0	0	0	0	1
cluster_6163	GIAGVGKT	1	0	0	0	0	0	0	0	0	0	0	0	0	0	0	0	0	0	0	0	0	0	0	0	0	0	0	0	4	3	0	0	1	0	0	0	0	0	0	0	0	0	2	0	1	0	0	0
cluster_6172	GIAGVGKT	1	0	0	0	0	0	0	0	0	0	47	1	0	0	0	0	0	5	9	15	0	0	2	4	2	0	0	2	13	5	9	0	0	3	0	2	1	0	2	0	0	1	2	2	11	1	1	45
cluster_6179	GIAGVGKT	1	0	0	0	0	0	0	0	0	0	0	0	0	0	0	0	0	0	0	0	0	0	0	0	0	0	0	0	0	0	0	0	0	0	0	0	0	0	0	0	0	0	0	0	0	0	0	0
cluster_6185	GIAGVGKT	1	0	0	0	0	0	0	0	0	0	0	0	0	0	0	0	0	0	0	0	0	0	0	0	0	0	0	0	5	7	0	0	0	0	3	0	85	0	0	0	0	0	0	0	0	0	0	0
cluster_6192	GVAGIGKS	2	0	0	0	0	0	0	0	0	0	0	0	0	0	0	0	0	0	0	0	0	0	0	0	0	0	0	0	6	7	0	0	7	0	0	4	0	6	0	3	0	8	3	3	9	0	0	0
cluster_6194	GVAGIGKS	2	0	0	0	0	0	0	0	0	0	0	0	0	0	0	0	0	0	0	0	0	0	0	0	0	0	0	0	7	0	8	0	0	0	0	0	0	0	0	0	0	0	0	0	0	0	0	0
cluster_6195	GVAGIGKS	2	0	0	0	0	0	0	0	0	0	0	0	0	0	0	0	0	0	0	0	0	0	0	0	0	0	0	0	3	0	0	2	0	0	0	3	39	2	0	1	0	5	0	2	0	2	1	2
cluster_6196	GVAGIGKS	2	0	0	0	0	0	0	0	0	0	0	0	17	0	22	0	0	0	0	0	0	0	0	0	6	0	0	0	5	0	0	0	0	0	5	2	63	0	0	0	0	5	0	7	0	5	1	0
cluster_6198	GVAGIGKS	2	0	0	0	0	0	0	0	0	0	0	0	0	0	0	0	0	0	0	0	0	0	0	0	0	0	0	0	2	2	0	0	0	0	0	0	0	0	0	0	0	0	0	2	0	0	0	0
cluster_6210	GVAGIGKS	2	0	0	0	0	0	0	0	0	0	0	0	0	0	0	0	0	0	0	0	0	0	0	0	0	0	0	0	1	2	1	3	1	1	0	2	19	0	1	0	1	0	2	0	1	1	0	0
cluster_6212	GVAGIGKS	2	0	1	0	0	0	0	0	0	5	0	0	10	0	0	4	0	0	0	0	2	0	0	0	0	0	0	0	0	0	0	0	3	0	0	3	0	0	0	0	0	0	0	0	0	0	0	8
cluster_6213	GVAGIGKS	2	0	0	0	0	0	0	0	0	0	0	0	0	0	0	2	0	0	0	0	0	0	0	0	0	0	0	0	10	0	0	0	0	0	0	0	0	0	3	0	3	0	0	4	0	5	5	0
cluster_6214	GVAGIGKS	2	0	0	0	0	0	0	0	0	0	0	0	0	0	0	0	0	0	0	0	0	0	0	0	0	0	0	0	3	2	1	1	0	0	0	0	14	0	0	0	1	4	0	4	0	0	1	0
cluster_6215	GIAGIGKT	3	4	0	4	2	5	7	11	3	3	12	9	4	8	4	5	7	5	2	10	0	6	1	2	16	1	3	0	10	7	10	9	0	7	2	3	51	2	2	4	7	12	5	4	0	4	3	1
cluster_6216	GIAGIGKT	3	0	0	11	0	2	1	1	1	0	22	0	10	6	30	4	1	31	3	3	1	3	6	11	0	6	5	0	9	11	2	1	1	1	0	2	12	6	2	0	1	12	4	3	0	1	5	39
cluster_6217	GIAGIGKT	3	0	0	0	0	0	0	0	0	0	0	0	0	0	0	0	0	0	0	0	0	0	0	0	0	0	0	0	0	0	0	0	0	0	0	0	0	0	0	0	0	0	0	0	0	0	0	0
cluster_6220	GIAGIGKT	3	0	0	0	0	0	0	0	0	0	0	0	0	0	0	0	0	0	0	0	0	0	0	0	0	0	0	0	5	0	0	10	3	0	0	6	0	7	0	0	0	7	0	0	0	4	0	3
cluster_6227	GIAGIGKT	3	0	0	0	0	0	0	0	0	0	0	0	0	0	0	0	0	0	0	0	0	0	0	0	0	0	0	0	5	0	0	0	4	0	0	0	14	0	0	2	0	2	0	3	0	0	0	0
cluster_6228	GIAGIGKT	3	0	0	0	0	0	0	0	0	4	0	0	0	1	0	2	0	0	0	0	0	0	0	0	1	0	0	0	1	0	0	8	0	1	0	1	10	3	0	1	1	0	0	0	2	0	0	1
cluster_6231	GIAGIGKT	3	0	0	0	0	0	0	0	0	0	0	0	0	0	0	0	0	0	0	0	0	0	0	0	0	0	0	0	5	0	6	0	0	0	0	1	0	2	1	0	0	0	0	0	0	0	3	0
cluster_6262	GVAGIGKT	4	0	0	0	0	0	0	0	0	0	0	7	0	10	0	0	0	0	0	0	0	0	0	0	0	0	0	0	6	0	0	0	0	0	0	0	0	0	0	0	4	0	0	0	0	0	0	0
cluster_6266	GIAGVGKT	1	0	0	0	0	0	0	0	0	0	0	0	0	0	0	0	0	0	0	0	0	0	0	0	0	0	0	0	1	7	6	0	0	0	0	0	0	0	0	0	0	7	0	0	0	0	2	0
cluster_6280	GIAGVGKT	1	0	0	0	0	0	0	0	0	0	0	1	22	5	13	0	0	0	0	0	0	0	0	0	0	10	11	0	1	7	0	0	0	5	0	0	0	2	0	5	4	0	0	0	0	0	0	0
cluster_6282	GIAGVGKT	1	0	0	0	0	0	0	0	0	1	2	0	1	1	0	2	1	0	1	1	0	1	1	1	0	0	0	0	4	7	0	7	0	0	0	0	0	0	1	4	2	0	0	5	6	0	0	15
cluster_6284	GIAGVGKT	1	0	0	0	0	0	0	0	0	0	0	0	0	0	0	0	0	0	0	0	0	0	0	0	0	0	0	0	0	3	0	0	1	2	2	0	0	0	0	2	0	0	3	0	0	0	0	0
cluster_6286	multiple	multiple	0	0	0	0	0	0	0	0	0	0	0	0	0	0	0	0	0	0	0	0	0	0	0	0	0	0	0	0	1	0	0	0	0	0	0	0	0	0	0	0	0	0	0	0	0	0	0
cluster_6300	GVAGIGKS	2	0	0	0	0	0	0	0	0	0	0	0	0	0	0	0	1	18	0	0	1	0	0	0	0	0	0	0	0	6	0	0	8	0	0	7	0	7	0	0	0	7	0	1	0	0	0	3
cluster_6303	GVAGIGKS	2	0	0	0	0	1	0	0	0	21	29	23	22	26	18	16	33	14	13	26	4	22	17	4	13	6	7	0	7	19	12	0	0	1	0	0	1	0	0	0	0	0	2	0	1	1	0	5
cluster_6313	GVAGIGKS	2	0	0	0	0	0	0	0	0	0	0	0	0	0	0	0	0	0	0	0	0	0	0	0	0	0	0	0	0	1	0	0	0	0	0	0	6	0	0	0	0	0	0	0	0	0	0	0
cluster_6316	GVAGIGKS	2	0	0	0	0	0	0	2	0	0	0	0	0	0	0	0	0	0	0	0	0	0	0	0	0	0	0	0	0	1	0	0	0	0	0	0	0	0	0	0	2	0	0	0	0	0	0	0
cluster_6317	GVAGIGKS	2	0	0	0	0	0	0	0	0	2	0	0	0	0	0	0	0	0	0	0	0	0	0	0	0	0	0	0	2	10	6	0	0	0	0	4	0	0	0	0	0	6	0	0	3	0	0	0
cluster_6319	GVAGIGKS	2	0	0	0	1	0	0	2	0	0	0	1	0	0	0	0	0	0	0	0	0	0	0	0	0	0	0	0	0	3	0	0	0	0	0	0	0	1	0	0	0	0	0	0	0	0	0	0
cluster_6321	GVAGIGKS	2	0	0	0	0	0	0	0	0	0	0	0	0	0	0	0	0	0	0	21	0	0	0	0	0	0	0	0	0	2	4	4	0	0	2	0	0	0	0	0	0	0	0	0	0	2	0	1
cluster_6322	GVAGIGKS	2	0	0	0	0	0	0	0	0	0	0	1	0	0	0	0	0	0	0	0	0	0	0	0	0	0	0	0	0	1	0	0	0	0	0	0	0	0	0	0	0	0	0	0	0	0	0	0
cluster_6325	GVAGIGKS	2	0	0	0	0	0	0	0	0	0	0	0	0	0	0	0	0	0	0	0	0	0	0	0	0	0	0	0	0	1	0	0	0	0	0	0	0	0	0	0	0	0	0	0	0	0	0	0
cluster_6328	GVAGIGKS	2	0	0	0	0	0	0	0	0	22	0	0	27	0	30	0	0	1	1	18	0	0	8	0	0	0	0	1	7	10	3	0	2	0	3	0	37	0	0	0	1	0	3	0	2	0	0	0
cluster_6331	GVAGIGKS	2	0	0	0	0	0	0	0	0	0	0	0	0	0	1	1	0	1	0	0	0	0	0	1	0	0	2	0	3	6	0	0	0	0	0	0	1	0	2	2	0	3	0	0	1	0	0	0
cluster_6332	GVAGIGKS	2	0	0	0	0	0	0	0	0	0	20	31	0	0	0	0	1	14	0	16	0	19	1	9	0	0	0	0	4	11	0	3	0	16	0	3	0	0	0	0	0	5	0	3	5	0	0	0
cluster_6333	GVAGIGKS	2	0	0	0	0	0	0	0	0	0	0	0	0	0	0	0	0	0	0	0	0	0	0	0	0	0	0	0	0	0	0	0	0	0	0	0	0	0	0	0	0	0	0	0	0	0	0	0
cluster_6334	GVAGIGKS	2	0	0	0	0	0	0	0	0	0	0	0	0	0	0	0	0	0	0	0	0	0	0	0	0	0	0	0	0	1	0	0	0	0	0	0	0	0	0	0	0	0	0	0	0	0	0	0
cluster_6339	GVAGIGKS	2	0	0	0	0	0	0	3	0	8	6	0	14	3	9	0	1	0	9	8	0	6	4	0	10	0	0	0	3	2	0	0	0	0	0	0	0	1	0	0	0	0	0	0	1	0	0	3
cluster_6342	multiple	multiple	0	0	0	0	0	0	0	0	0	6	0	13	0	19	22	8	0	0	8	1	0	13	2	0	8	8	0	0	9	0	6	0	0	0	0	0	0	0	0	0	0	0	1	0	0	0	0
cluster_6343	GVAGIGKS	2	0	0	0	0	0	0	0	0	0	1	0	0	0	0	0	0	0	0	0	0	0	0	0	0	0	0	0	0	5	2	0	0	0	0	0	0	0	0	0	0	0	0	0	0	0	0	0
cluster_6355	GIAGIGKT	3	0	0	0	0	0	0	0	0	0	2	0	0	0	1	6	2	0	0	1	0	1	0	4	0	0	0	0	0	5	0	1	0	0	0	0	0	0	0	0	0	0	0	1	0	0	0	2
cluster_6368	GIAGIGKT	3	0	0	0	0	0	0	0	0	0	0	0	0	0	0	0	0	0	0	0	0	0	0	0	0	0	0	0	0	7	7	0	0	1	0	0	3	0	0	0	0	0	0	0	0	0	0	0
cluster_6369	GIAGIGKT	3	0	0	0	0	0	0	0	0	0	0	0	0	0	0	8	0	0	0	0	1	0	0	7	0	0	0	0	0	12	0	4	0	0	0	0	0	0	0	0	0	0	0	4	0	0	0	6
cluster_6371	GIAGIGKT	3	0	0	0	0	0	0	0	0	0	0	0	0	0	0	0	0	0	0	0	0	0	0	0	0	0	0	0	1	9	0	0	0	0	0	0	1	0	0	0	0	8	0	0	0	0	0	0
cluster_6374	GIAGIGKT	3	0	0	0	0	0	0	0	0	0	0	0	0	2	0	0	0	3	0	0	0	0	0	0	0	0	0	0	1	2	1	1	1	0	1	0	12	2	1	0	0	0	3	1	0	0	0	0
cluster_6375	GIAGIGKT	3	0	0	0	0	0	0	0	0	0	0	0	0	0	0	0	0	0	0	0	0	0	0	0	0	0	0	0	0	1	0	0	0	0	0	0	0	0	0	0	0	0	0	0	0	0	0	0
cluster_6382	GIAGIGKT	3	0	0	0	0	0	0	0	0	0	0	0	0	0	0	0	0	1	0	0	0	0	0	0	0	0	0	0	0	7	0	0	0	0	0	0	0	0	0	0	0	0	0	0	0	0	0	0
cluster_6391	GIAGIGKT	3	0	0	0	0	0	0	0	0	0	0	0	0	0	0	0	0	0	0	0	0	0	0	0	0	0	0	0	0	6	0	0	0	0	0	0	0	0	0	0	0	0	0	0	0	0	0	0
cluster_6393	GIAGIGKT	3	0	0	0	0	0	0	0	0	0	14	1	0	0	0	0	0	0	0	0	0	8	2	0	0	0	0	0	4	7	0	0	0	0	0	0	0	0	0	0	0	0	2	2	0	0	1	0
cluster_6394	GIAGIGKT	3	0	0	0	0	0	0	0	0	0	5	0	6	0	5	0	0	0	0	0	0	0	0	0	0	0	0	0	0	5	4	0	0	0	0	0	0	0	0	0	0	0	0	0	0	0	0	2
cluster_6397	GIAGIGKT	3	0	0	0	0	0	0	0	0	0	0	0	0	0	0	0	0	0	0	0	0	0	6	0	0	0	0	0	0	5	6	0	0	2	0	0	1	0	0	0	0	3	3	0	11	0	0	0
cluster_6399	GIAGIGKT	3	1	3	0	0	3	0	1	5	1	1	4	3	1	3	2	4	1	0	2	0	0	1	0	0	0	0	0	0	3	0	0	0	0	1	0	7	0	0	0	0	0	0	0	0	0	0	1
cluster_6500	GVAGIGKS	2	0	0	0	0	0	0	0	0	1	0	0	0	0	0	1	0	0	1	1	0	0	1	0	0	0	0	0	1	1	8	5	5	2	1	3	88	0	1	1	0	16	1	3	3	0	0	1
cluster_6502	GIAGIGKT	3	1	1	1	2	4	2	0	3	0	4	0	0	1	0	2	0	0	3	0	0	3	1	1	1	1	2	0	2	1	9	2	2	2	0	0	28	0	2	3	0	5	2	1	1	1	1	1
cluster_6503	GIAGIGKT	3	0	0	0	0	0	0	0	0	0	0	0	0	0	0	0	0	0	0	0	0	0	0	0	0	0	0	0	0	0	10	0	7	0	0	7	0	0	0	0	0	0	0	0	0	0	0	1
cluster_6507	GIAGIGKT	3	0	0	3	0	0	0	0	0	21	5	52	5	5	8	0	0	2	18	1	0	1	38	2	9	0	0	0	4	4	9	0	0	4	1	0	19	1	2	1	2	5	5	10	2	0	0	1
cluster_6510	GIAGIGKT	3	0	0	0	0	0	0	0	0	0	0	0	0	0	0	0	0	0	0	0	0	0	0	0	0	0	0	0	0	4	6	0	0	0	0	0	0	0	0	0	0	0	0	0	0	0	0	0
cluster_6515	GIAGIGKT	3	0	0	0	0	0	0	0	0	2	0	4	1	6	0	0	0	1	0	4	0	0	0	4	0	5	5	0	0	0	1	2	2	2	2	2	15	2	4	1	2	0	0	1	1	2	1	4
cluster_6517	GIAGIGKT	3	0	0	1	0	0	0	0	0	1	0	0	0	0	1	0	0	0	0	2	0	3	3	0	6	0	1	1	3	0	14	1	0	2	3	1	51	2	2	1	0	0	3	1	5	1	0	0
cluster_6522	GIAGIGKT	3	0	0	0	0	0	0	0	0	4	0	0	0	0	0	0	1	2	4	0	0	0	1	0	0	0	0	0	0	0	9	0	0	0	0	0	0	3	2	0	0	1	0	0	1	0	0	0
cluster_6531	GIAGIGKT	3	0	0	0	0	1	0	0	0	0	0	0	0	0	0	0	0	0	0	0	0	0	0	0	1	0	0	0	0	1	0	0	0	0	0	0	0	0	0	1	1	3	0	0	0	3	1	2
cluster_6540	GIAGIGKT	3	10	7	5	7	11	4	6	5	7	1	2	16	1	15	0	7	2	5	4	0	1	19	0	3	6	12	0	1	5	7	0	0	0	4	1	37	0	1	0	2	6	0	0	1	3	0	10
cluster_6541	GIAGIGKT	3	0	0	0	0	0	0	0	0	0	0	1	0	0	0	0	0	0	0	0	0	0	0	0	0	1	0	0	0	0	3	0	0	0	0	0	16	0	0	1	1	0	0	0	2	1	0	0
cluster_6544	GIAGIGKT	3	0	0	0	0	0	0	0	0	0	2	0	0	0	0	1	0	0	0	0	0	0	0	0	0	0	0	0	0	0	10	0	2	0	0	0	0	0	0	0	0	0	0	0	0	0	0	0
cluster_6561	GVAGIGKT	4	6	2	0	5	0	0	5	0	5	8	20	0	9	3	5	9	2	2	9	0	6	4	1	0	16	16	1	1	5	7	0	13	0	5	0	0	15	0	2	5	12	0	5	8	3	1	13
cluster_6563	GVAGIGKT	4	0	0	0	0	0	0	0	0	0	0	0	0	0	0	0	0	0	0	0	0	0	0	0	0	0	0	0	0	0	2	1	7	0	0	0	0	0	1	0	2	0	0	0	0	0	1	0
cluster_6564	GVAGIGKT	4	2	0	3	1	8	12	2	4	0	0	18	0	13	0	12	8	0	0	14	0	14	2	0	8	13	18	0	0	0	0	0	0	0	0	0	0	0	1	0	1	0	0	0	0	0	0	6
cluster_6575	GIAGVGKT	1	0	0	0	0	0	0	0	0	0	0	0	0	0	0	0	0	0	0	0	0	0	0	0	0	0	0	0	0	0	0	5	1	0	2	2	0	0	0	0	0	0	0	0	0	0	0	1
cluster_6591	multiple	multiple	0	0	0	0	0	0	0	0	0	0	0	0	0	0	0	0	0	0	0	0	0	1	0	0	0	0	0	0	0	0	2	0	0	0	0	0	0	0	0	0	2	0	0	0	0	0	0
cluster_6598	GVAGIGKS	2	0	0	0	0	0	0	0	0	0	0	0	0	0	0	0	0	0	0	0	0	8	0	0	0	0	0	0	0	1	0	8	0	0	0	0	0	0	0	0	0	0	0	0	0	0	0	0
cluster_6599	GVAGIGKS	2	0	0	6	0	0	0	6	0	1	0	0	0	0	2	0	0	0	0	0	0	0	0	0	1	0	0	1	0	4	4	7	5	0	0	1	58	0	3	0	2	7	0	2	0	9	0	0
cluster_6602	GVAGIGKS	2	0	0	0	0	0	0	0	0	0	1	0	29	0	18	0	12	19	0	16	0	14	0	7	0	0	0	0	0	0	0	5	0	0	1	0	0	0	0	0	0	0	2	0	4	1	1	6
cluster_6604	GVAGIGKS	2	0	0	0	0	0	0	0	0	0	0	0	0	0	0	0	0	0	0	0	0	0	0	0	0	0	0	0	0	0	0	1	0	0	0	0	0	0	0	0	0	0	0	0	0	0	0	0
cluster_6609	GVAGIGKS	2	0	2	1	0	0	0	0	0	0	1	0	0	0	0	0	0	0	0	0	0	0	0	6	1	0	0	0	0	0	0	4	0	0	2	0	0	0	1	0	1	0	0	0	1	0	0	0
cluster_6611	GVAGIGKS	2	0	0	1	0	0	0	0	0	0	2	0	0	0	1	0	0	0	0	0	0	0	0	0	0	0	0	0	0	0	0	3	0	0	0	2	3	0	0	0	0	1	0	0	1	0	0	0
cluster_6612	GVAGIGKS	2	0	0	0	0	0	0	0	0	1	2	3	0	3	5	1	4	3	6	5	0	1	5	0	0	0	0	0	0	2	1	2	0	1	0	0	1	0	0	0	0	0	1	0	0	2	0	0
cluster_6656	GIAGIGKT	3	0	0	0	0	0	0	0	0	1	0	0	0	0	0	0	0	0	0	0	0	0	0	1	0	0	0	0	0	0	4	19	0	1	0	0	3	1	0	0	0	0	0	0	1	0	0	0
cluster_6662	GIAGIGKT	3	4	4	4	0	4	0	5	11	1	0	1	0	0	0	0	0	0	0	0	0	0	0	0	0	0	0	0	0	0	0	5	0	0	0	0	0	0	1	0	0	0	0	0	0	0	0	8
cluster_6663	GIAGIGKT	3	0	0	0	1	0	0	0	0	0	2	0	0	0	0	0	1	0	3	0	0	4	5	0	0	0	1	0	2	0	5	14	0	2	0	4	0	0	0	3	0	0	0	0	0	0	0	0
cluster_6666	GIAGIGKT	3	0	0	0	0	0	0	0	0	0	0	0	0	0	0	0	0	0	0	0	0	0	0	0	0	0	0	0	0	0	0	1	0	0	0	0	0	0	0	0	0	0	0	0	0	0	0	0
cluster_6667	GIAGIGKT	3	0	0	0	0	0	0	0	0	0	0	0	0	0	0	0	0	0	0	0	0	2	4	0	0	1	0	0	1	0	3	15	0	1	0	3	0	0	0	0	0	0	0	0	0	6	0	0
cluster_6669	GIAGIGKT	3	0	1	0	0	2	1	1	2	0	0	0	0	0	3	1	0	0	0	0	0	0	0	0	0	0	0	0	0	0	0	1	0	0	0	0	0	0	0	0	2	1	0	0	0	0	0	0
cluster_6670	GIAGIGKT	3	0	0	0	0	0	0	0	0	0	0	0	0	0	0	0	0	1	0	0	0	0	0	0	0	0	0	0	0	0	0	4	0	0	0	2	0	0	0	0	0	0	0	0	0	1	1	1
cluster_6672	GIAGIGKT	3	0	0	0	0	0	0	0	0	0	6	0	0	0	0	0	0	0	0	0	0	0	0	0	0	0	0	0	0	0	0	6	0	0	0	0	0	0	0	0	0	0	0	0	0	0	0	1
cluster_6676	GIAGIGKT	3	2	1	1	1	1	4	1	1	0	0	1	0	0	0	0	0	0	0	1	0	0	0	2	5	1	0	0	1	1	1	5	0	2	1	3	8	0	1	0	1	0	6	0	0	1	1	2
cluster_6679	GIAGIGKT	3	0	0	0	0	0	0	0	0	0	0	0	0	0	0	0	0	0	0	0	0	0	0	0	0	0	0	0	0	0	0	4	0	0	0	0	0	3	0	0	0	0	3	0	0	0	0	0
cluster_6680	GIAGIGKT	3	0	0	0	0	0	0	0	0	0	0	0	0	0	0	0	0	0	0	0	0	0	0	0	0	0	0	0	0	0	0	2	0	0	0	0	0	0	0	0	0	0	0	0	0	0	0	0
cluster_6689	GVAGIGKT	4	5	3	2	8	6	9	4	6	95	87	31	65	41	77	12	18	22	47	12	4	7	48	17	32	0	0	0	8	22	3	9	5	2	11	5	27	2	0	2	3	5	15	2	7	4	2	7
cluster_6690	GVAGIGKT	4	0	0	0	0	0	0	0	0	0	0	0	0	0	0	0	0	0	0	0	0	0	0	0	0	0	0	0	0	0	0	7	0	0	0	0	0	0	0	0	0	0	0	0	0	6	0	0
cluster_6693	GVAGIGKT	4	0	0	0	0	0	0	0	0	0	0	0	0	0	0	0	0	0	0	0	0	0	0	0	0	0	0	0	0	0	0	3	0	3	0	0	27	0	0	0	0	0	0	0	0	0	0	0
cluster_6694	GIAGVGKT	1	0	0	0	0	1	0	0	0	0	6	16	57	36	11	9	0	3	0	0	0	0	0	1	0	3	9	0	0	0	0	0	17	8	0	0	0	0	0	5	0	1	0	1	0	0	0	0
cluster_6696	GIAGVGKT	1	0	0	0	0	0	0	0	0	0	0	0	0	0	0	0	0	0	0	0	0	0	0	0	0	0	0	0	5	3	3	3	7	7	0	0	0	0	0	3	0	0	0	4	7	0	0	0
cluster_6698	GIAGVGKT	1	0	0	0	0	0	0	0	0	3	3	23	4	2	21	3	5	2	19	3	0	0	9	0	0	0	0	0	0	1	0	0	13	0	0	0	0	0	1	0	0	0	0	0	0	5	0	0
cluster_6699	GIAGVGKT	1	0	0	0	0	0	0	0	0	0	0	0	0	0	0	0	0	0	0	0	0	0	0	0	0	0	0	0	0	4	0	0	10	13	0	0	0	0	0	0	0	0	0	0	0	0	0	0
cluster_6700	GIAGVGKT	1	0	0	0	0	0	0	0	0	1	4	0	0	0	0	0	2	0	3	0	0	0	1	0	1	0	0	0	0	1	0	0	5	0	2	0	0	0	0	1	0	0	2	0	0	0	0	0
cluster_6702	GIAGVGKT	1	0	0	0	0	0	0	0	0	0	0	0	0	0	0	0	0	0	0	0	0	0	0	0	0	0	0	0	0	0	0	0	1	0	0	0	0	0	0	0	0	0	0	0	0	0	0	0
cluster_6708	GIAGVGKT	1	0	0	0	0	0	0	0	0	0	2	0	1	1	2	0	0	2	0	0	0	0	1	0	0	0	0	0	0	3	0	0	7	0	3	0	5	0	0	1	0	2	1	1	3	0	0	4
cluster_6709	GIAGVGKT	1	0	0	0	0	0	0	0	0	0	0	0	6	0	1	4	0	0	0	0	0	0	0	0	0	2	0	0	1	0	0	1	2	0	1	1	0	1	0	0	0	0	0	0	0	2	0	0
cluster_6710	GIAGVGKT	1	0	0	0	0	0	0	0	0	0	3	1	6	3	9	3	8	4	7	2	0	3	2	0	0	1	1	0	0	0	0	0	5	0	0	0	0	0	0	0	0	0	0	0	0	0	0	0
cluster_6712	GIAGVGKT	1	0	0	3	0	0	1	0	0	6	17	0	21	4	5	3	2	3	2	0	1	4	11	7	3	1	3	0	0	1	0	0	10	0	0	0	0	0	1	1	1	11	0	3	2	0	0	0
cluster_6715	GIAGVGKT	1	0	0	0	0	0	0	0	0	0	0	0	0	0	0	0	0	0	0	0	0	0	0	0	0	0	0	0	1	0	0	0	4	0	0	0	0	2	0	0	0	0	0	3	0	0	0	0
cluster_6718	multiple	multiple	4	1	1	2	4	9	3	5	37	10	0	26	35	19	2	13	10	15	13	0	9	8	7	15	19	32	0	0	0	1	4	9	2	0	3	0	0	1	0	1	1	0	2	3	0	0	1
cluster_6719	GIAGVGKT	1	0	0	0	0	0	0	0	0	1	0	0	9	0	2	1	0	0	0	0	0	0	5	7	0	0	0	0	0	2	0	0	4	0	1	0	0	0	1	1	0	0	3	0	0	0	0	0
cluster_6721	GVAGIGKS	2	0	0	0	0	0	0	0	0	0	2	0	3	0	0	0	0	0	0	0	0	0	0	0	0	0	0	0	0	0	0	0	2	0	0	0	0	0	0	0	0	0	0	0	0	0	0	0
cluster_6729	GVAGIGKS	2	0	0	0	0	0	0	0	0	0	0	0	0	0	0	0	0	0	0	0	0	0	0	0	0	0	0	0	0	0	0	0	0	0	0	0	0	0	0	0	0	0	0	0	0	0	0	0
cluster_6730	GVAGIGKS	2	0	0	0	0	0	0	0	0	46	4	0	34	0	75	6	22	15	14	38	1	0	25	16	0	0	0	0	0	0	0	0	12	0	0	0	0	0	1	1	0	0	0	0	0	0	1	0
cluster_6737	GVAGIGKS	2	0	0	0	0	0	0	0	0	0	0	0	0	0	0	0	0	0	0	0	0	0	0	0	0	0	0	0	0	0	0	1	13	0	0	0	0	7	0	0	0	0	0	0	0	2	0	0
cluster_6740	GVAGIGKS	2	0	0	0	0	0	0	0	0	0	0	0	0	0	0	0	0	0	0	0	0	0	0	0	0	0	0	0	0	1	0	0	1	0	0	0	0	0	0	0	0	0	0	0	0	0	0	0
cluster_6741	GVAGIGKS	2	0	0	0	0	0	0	0	0	0	0	0	0	0	0	0	0	0	0	0	0	0	0	0	0	0	0	0	0	0	0	0	0	0	0	0	0	0	0	0	0	0	0	0	0	0	0	0
cluster_6743	GVAGIGKS	2	0	0	4	0	0	0	0	0	0	0	0	18	1	15	0	7	10	0	5	0	0	17	0	0	0	0	0	0	1	6	0	6	0	0	0	0	0	0	0	0	0	0	0	0	1	0	1
cluster_6744	GVAGIGKS	2	18	11	6	17	10	19	11	20	0	23	35	15	13	0	12	0	0	11	5	1	0	0	0	37	7	15	0	2	0	0	0	5	1	0	0	1	0	0	0	2	0	0	0	3	3	0	4
cluster_6745	GVAGIGKS	2	0	0	0	0	0	0	0	0	0	22	0	0	0	0	0	23	0	0	0	0	23	0	0	0	0	0	0	0	0	0	0	7	0	0	0	0	0	0	0	0	0	0	0	0	0	0	0
cluster_6750	GVAGIGKS	2	0	0	0	0	0	0	0	0	0	0	0	0	0	0	0	0	0	0	0	0	0	0	0	14	0	0	0	0	0	0	0	9	0	0	0	0	0	0	0	5	0	0	9	0	0	0	0
cluster_6753	GVAGIGKS	2	0	0	0	0	0	0	0	0	0	0	0	0	0	0	0	0	0	0	0	0	0	0	0	0	0	0	0	0	0	0	4	2	0	0	1	11	0	0	0	0	0	0	0	0	0	0	0
cluster_6756	GVAGIGKS	2	0	0	0	0	0	0	0	0	0	0	0	0	0	0	0	0	0	0	0	0	0	0	0	0	0	0	0	0	1	1	0	1	0	0	0	0	0	0	0	0	0	0	0	0	0	0	0
cluster_6760	multiple	multiple	0	0	0	0	0	0	0	0	4	0	5	4	7	4	0	0	4	1	3	0	2	1	0	0	15	12	0	0	0	0	0	9	0	0	0	0	2	0	1	0	0	0	4	0	0	0	1
cluster_6767	multiple	multiple	1	0	0	0	4	13	4	9	8	15	3	13	3	2	0	4	14	3	4	1	5	6	5	3	9	3	0	3	4	3	1	5	1	0	0	13	4	1	2	0	1	2	1	2	5	3	17
cluster_6770	GIAGIGKT	3	0	0	0	0	0	0	0	0	1	4	36	0	0	25	0	3	0	0	0	0	0	10	0	0	0	0	0	0	0	0	0	10	2	2	0	3	0	1	6	0	8	9	7	0	0	0	0
cluster_6773	GIAGIGKT	3	0	0	0	0	0	0	0	0	0	0	0	0	0	0	0	0	0	0	0	0	0	0	0	0	0	0	0	0	0	0	0	0	0	0	0	0	0	0	0	0	0	0	0	0	0	0	0
cluster_6778	GIAGIGKT	3	0	0	0	0	0	0	0	0	0	0	0	0	0	0	0	0	0	0	0	0	0	0	0	0	0	0	0	0	0	0	0	1	0	0	0	0	0	0	0	0	0	0	0	0	0	0	0
cluster_6779	GIAGIGKT	3	0	0	0	0	0	0	0	0	0	0	0	0	0	0	0	0	0	0	0	0	0	0	0	0	0	0	0	0	0	3	1	10	1	0	0	0	0	0	0	0	1	0	0	0	0	0	0
cluster_6782	GIAGIGKT	3	0	0	0	0	0	0	0	0	15	1	0	15	0	22	21	13	0	1	0	0	24	15	5	0	0	0	0	5	7	1	0	10	0	0	1	23	6	1	1	3	3	3	2	0	0	0	9
cluster_6789	GIAGIGKT	3	0	0	0	0	0	0	0	0	0	0	0	0	0	0	0	0	0	0	0	0	0	0	0	0	0	0	0	0	0	0	0	1	0	0	0	0	0	0	0	0	0	0	0	0	0	0	0
cluster_6792	GIAGIGKT	3	0	0	0	0	0	0	0	0	4	1	1	0	0	0	0	0	9	4	0	0	0	1	0	0	0	0	0	0	0	0	0	13	0	0	0	0	0	0	0	0	0	0	0	0	0	0	0
cluster_6794	GIAGIGKT	3	0	0	0	0	0	0	0	0	0	0	0	0	32	0	0	0	0	0	0	0	0	8	0	0	32	21	0	1	4	0	3	7	0	0	0	0	0	0	0	0	0	0	0	0	0	0	20
cluster_6795	GIAGIGKT	3	0	0	0	0	0	0	0	0	0	11	1	1	0	0	0	8	1	0	2	0	0	0	0	0	0	0	0	5	0	9	19	13	6	5	0	1	6	5	1	0	0	0	0	4	4	0	7
cluster_6805	GIAGIGKT	3	0	0	0	0	0	0	0	0	0	0	0	0	0	0	1	0	0	0	0	0	0	0	0	0	0	0	0	0	0	0	0	4	0	0	0	0	0	0	0	0	0	0	0	18	0	0	0
cluster_6810	GVAGIGKT	4	0	0	0	0	0	0	0	0	0	0	0	0	0	0	0	0	0	0	0	0	0	0	0	0	0	0	0	0	0	0	0	0	0	0	0	0	0	0	0	0	0	0	0	0	0	0	0
cluster_6815	GVAGIGKT	4	3	5	3	2	0	0	2	0	0	0	0	0	0	1	0	0	1	0	0	0	0	0	0	0	0	0	0	3	2	1	0	5	0	0	0	0	5	0	6	1	6	2	3	4	3	1	14
cluster_6817	GVAGIGKT	4	0	0	0	0	0	0	0	0	0	0	0	0	0	0	0	0	0	0	0	0	0	0	0	0	0	0	0	0	0	0	0	7	0	0	1	0	0	2	0	1	0	0	0	0	0	0	3
cluster_6818	GVAGIGKT	4	0	0	0	0	0	0	0	0	0	0	0	0	0	0	0	0	0	0	0	0	0	0	0	0	0	0	0	0	0	0	0	6	0	0	0	0	8	0	0	0	0	3	5	0	0	0	0
cluster_6827	GIAGVGKT	1	0	0	0	0	0	0	0	0	0	12	0	0	0	0	0	0	0	0	0	1	0	0	0	0	0	0	0	0	0	0	0	0	5	0	0	0	0	0	0	0	7	0	0	24	0	0	0
cluster_6849	GIAGVGKT	1	0	0	0	0	0	0	0	0	0	1	0	1	0	0	0	0	0	0	0	4	0	0	0	0	0	0	0	0	0	0	1	0	4	0	0	0	2	3	0	0	4	4	0	5	0	3	11
cluster_6857	GVAGIGKS	2	0	0	0	0	0	0	0	0	0	0	0	0	0	0	0	0	0	0	0	0	0	0	0	0	0	0	0	0	0	0	0	0	0	0	0	0	0	0	0	0	0	0	0	0	0	0	0
cluster_6860	GVAGIGKS	2	0	0	0	0	0	0	0	0	0	0	0	0	0	0	0	0	0	0	0	0	0	0	0	0	0	0	0	0	0	0	0	0	4	0	0	0	8	0	0	0	0	1	0	0	0	0	0
cluster_6863	GVAGIGKS	2	0	0	0	0	0	0	0	0	0	0	0	0	0	0	0	0	0	0	0	0	0	0	0	0	0	0	0	0	0	1	0	0	7	0	0	0	1	0	0	0	0	1	0	0	0	0	0
cluster_6866	GVAGIGKS	2	0	0	0	0	0	0	0	0	0	0	0	0	0	0	0	0	0	0	0	0	0	0	0	0	0	0	0	0	0	0	0	0	0	0	0	1	0	0	0	0	0	0	0	0	1	0	0
cluster_6867	GVAGIGKS	2	0	0	0	0	0	0	0	0	0	0	0	2	0	0	0	0	0	0	0	0	0	0	0	0	0	0	0	0	0	0	0	0	6	0	0	0	0	0	0	0	0	0	0	0	0	0	0
cluster_6876	GVAGIGKS	2	0	0	0	0	0	0	0	0	0	0	0	0	0	0	0	0	0	0	0	0	0	0	0	0	0	0	0	0	0	0	0	0	2	0	0	0	0	0	0	0	0	0	0	0	0	0	0
cluster_6880	GVAGIGKS	2	0	0	0	0	0	0	0	0	0	0	0	0	0	0	0	0	0	0	0	0	0	0	0	0	0	0	0	0	0	0	0	0	0	0	0	0	0	0	0	0	0	0	0	0	0	0	12
cluster_6882	GVAGIGKS	2	0	0	0	0	0	0	0	0	1	0	0	0	0	0	0	0	0	6	0	0	3	7	0	0	0	0	0	0	0	0	0	0	5	0	4	0	0	0	0	0	0	2	1	0	0	0	0
cluster_6889	GVAGIGKS	2	4	3	1	7	13	13	1	5	0	0	0	0	0	0	0	0	0	0	0	0	0	0	0	0	0	0	0	0	0	0	2	0	2	1	0	0	0	1	0	1	0	3	0	0	0	0	0
cluster_6900	GIAGIGKT	3	0	0	0	0	0	0	0	0	0	0	0	0	0	0	0	0	0	0	0	0	0	0	0	0	0	0	0	0	0	0	0	0	5	0	0	0	0	1	0	0	0	0	0	0	0	0	0
cluster_6902	GIAGIGKT	3	2	0	0	5	7	0	12	7	1	9	0	0	0	0	0	4	0	5	1	0	4	0	2	3	3	4	0	0	0	1	0	0	16	0	0	121	0	0	5	12	0	0	0	6	3	0	1
cluster_6909	GIAGIGKT	3	0	0	0	0	0	0	0	0	22	21	33	1	0	0	6	0	19	50	7	1	2	0	0	16	0	0	0	0	0	0	11	0	7	2	0	32	0	2	0	5	1	1	0	7	0	0	6
cluster_6915	GIAGIGKT	3	0	0	0	0	0	0	0	0	0	0	0	0	0	0	0	0	0	0	0	0	0	0	0	0	0	0	0	0	0	0	0	0	0	0	0	0	0	0	0	0	0	0	0	0	0	0	0
cluster_6920	GIAGIGKT	3	0	0	0	0	0	0	0	0	0	0	0	0	0	0	0	0	0	0	0	0	0	0	0	0	0	0	0	0	0	0	0	0	0	0	0	0	2	0	0	0	0	0	0	1	0	0	0
cluster_6921	GIAGIGKT	3	0	7	2	5	7	12	7	8	6	0	0	0	0	0	6	0	7	1	0	2	0	3	0	0	0	0	0	0	0	0	0	14	8	3	2	19	0	1	1	3	0	2	0	0	1	0	3
cluster_6935	GIAGIGKT	3	0	0	0	0	0	0	0	0	0	0	0	0	4	0	0	0	1	0	0	0	0	0	0	0	0	0	0	0	0	0	0	0	9	0	0	0	0	0	0	0	0	0	0	6	1	0	0
cluster_6942	GIAGIGKT	3	0	0	0	0	0	0	0	0	2	0	0	0	0	0	0	0	0	0	0	0	0	0	0	0	0	0	0	0	0	0	0	0	5	1	1	0	0	0	0	0	6	0	0	7	0	0	2
cluster_6944	GIAGIGKT	3	0	0	0	0	0	0	0	0	0	0	0	0	0	0	0	0	0	0	0	0	0	0	0	0	0	0	0	0	0	0	0	0	1	0	1	0	0	0	0	0	0	0	0	0	0	0	0
cluster_6946	GIAGIGKT	3	0	0	0	0	0	0	0	0	0	0	0	0	0	0	0	0	0	0	0	0	0	0	0	0	0	0	0	0	0	0	0	0	0	0	0	0	0	0	0	0	0	0	0	0	0	0	0
cluster_6949	GIAGIGKT	3	0	0	0	0	0	0	0	0	0	0	0	0	0	0	0	0	0	0	0	0	0	0	0	0	0	0	0	0	0	0	0	0	0	0	0	0	0	0	0	0	0	0	0	0	0	0	0
cluster_6951	GVAGIGKT	4	0	0	0	0	0	0	0	0	0	0	0	0	0	0	0	0	0	1	0	0	0	0	1	0	0	0	0	0	0	0	0	0	5	0	0	0	0	0	0	0	0	0	0	0	1	0	12
cluster_6958	GVAGIGKT	4	0	0	0	0	0	0	0	0	0	0	0	0	0	0	0	0	0	0	0	0	0	0	0	0	0	0	0	0	0	0	0	0	0	0	0	0	0	0	0	0	0	0	0	0	0	0	0
cluster_6962	GVAGIGKT	4	0	0	0	0	0	0	0	0	0	0	0	0	0	0	0	0	0	0	0	0	0	0	0	0	0	0	0	0	0	0	0	0	4	0	0	0	0	0	0	0	0	0	0	0	0	0	0
cluster_6974	GIAGVGKT	1	0	0	0	0	0	0	0	0	0	0	0	0	0	0	0	0	0	0	0	0	0	0	0	0	0	0	0	1	0	0	0	1	0	4	0	0	0	0	0	1	0	0	0	0	0	0	0
cluster_6978	GIAGVGKT	1	0	0	0	0	0	0	0	0	0	0	0	0	0	0	0	0	0	0	0	0	0	0	1	0	0	0	0	0	8	0	0	0	0	6	0	0	0	0	0	2	0	0	0	0	0	0	1
cluster_6981	GIAGVGKT	1	0	0	4	0	0	0	0	0	0	2	0	1	4	4	4	0	0	0	0	0	0	4	7	5	0	0	0	0	4	2	0	3	0	2	3	3	3	0	4	0	21	4	2	0	0	2	0
cluster_6997	GVAGIGKS	2	0	0	2	0	0	0	0	0	0	6	0	0	0	0	0	0	0	0	0	0	0	1	0	0	2	2	0	1	9	5	0	0	5	10	0	0	0	0	0	0	0	0	0	0	0	1	0
cluster_6999	GVAGIGKS	2	0	0	0	0	0	0	0	0	0	0	0	0	0	0	0	0	0	0	0	0	0	0	0	0	0	0	0	2	0	0	0	2	2	7	0	0	0	0	4	1	0	0	0	6	0	0	7
cluster_7103	GIAGVGKT	1	0	0	0	0	0	0	0	0	0	0	0	0	0	0	0	0	0	0	0	0	0	0	0	0	0	0	0	0	0	0	0	0	0	0	5	0	0	0	0	0	0	0	0	0	0	0	0
cluster_7107	GVAGIGKS	2	0	0	0	0	0	0	0	0	1	24	0	0	0	0	0	0	10	0	1	0	0	0	0	0	1	2	0	0	0	0	0	0	0	0	7	0	0	0	1	0	0	0	0	0	1	0	0
cluster_7108	GVAGIGKS	2	0	0	0	0	0	0	0	0	0	0	0	0	0	0	0	0	0	0	0	0	0	0	0	0	0	0	2	0	0	0	0	0	6	0	11	1	9	0	0	0	19	10	0	0	0	2	0
cluster_7111	GVAGIGKS	2	0	0	0	0	0	0	0	0	0	3	21	0	0	0	0	0	0	0	0	0	0	0	0	0	0	0	0	0	0	0	0	0	0	0	6	57	0	0	0	0	10	0	0	0	0	1	9
cluster_7116	GVAGIGKS	2	0	0	0	0	0	0	0	0	0	0	0	0	0	0	0	0	0	0	0	0	0	0	0	0	0	0	0	1	0	0	0	0	0	0	1	0	0	0	0	0	0	0	0	2	0	0	0
cluster_7134	GVAGIGKS	2	0	0	7	0	0	0	27	0	28	27	0	33	0	56	32	39	0	46	32	0	31	22	0	15	0	0	0	0	1	1	0	0	0	0	6	0	0	0	1	2	0	5	0	0	0	1	14
cluster_7138	GVAGIGKS	2	9	6	6	6	19	22	16	13	0	5	0	25	0	8	3	4	7	4	6	0	17	0	0	0	10	7	1	0	0	0	0	1	2	0	11	18	8	0	1	6	7	7	1	6	1	0	9
cluster_7139	GVAGIGKS	2	0	0	0	0	0	0	0	0	0	0	0	0	0	0	0	0	0	0	0	0	0	0	0	0	0	0	0	0	0	0	0	0	0	0	0	0	0	0	0	0	0	0	0	0	0	0	0
cluster_7146	GVAGIGKS	2	0	0	0	0	0	0	0	0	0	1	0	0	1	0	0	0	0	1	1	0	0	1	0	0	0	0	0	0	0	0	0	0	0	0	1	6	0	0	0	0	0	0	0	0	0	0	4
cluster_7156	GVAGIGKS	2	0	0	0	0	0	0	0	0	0	2	0	1	0	0	0	0	0	1	0	0	0	1	0	0	0	0	1	0	0	0	0	4	0	0	11	0	1	1	0	0	0	0	0	0	1	1	0
cluster_7161	GVAGIGKS	2	0	0	0	0	0	0	0	0	0	0	0	0	0	0	0	0	0	0	0	0	0	0	0	0	0	0	0	0	0	0	0	0	0	0	0	0	0	0	0	0	0	0	0	0	0	0	2
cluster_7194	GIAGIGKT	3	0	0	0	0	0	0	0	0	0	0	0	0	0	0	0	0	0	0	0	0	0	0	0	1	0	0	0	2	6	0	0	0	0	0	9	0	0	1	0	1	1	0	3	0	0	0	1
cluster_7199	GIAGIGKT	3	0	1	0	1	1	2	1	0	0	0	0	0	15	0	0	19	0	0	1	0	0	6	0	1	0	0	0	0	0	0	0	0	0	1	9	0	0	0	0	0	0	0	0	0	0	0	0
cluster_7202	GIAGIGKT	3	8	5	1	9	11	7	3	11	12	0	0	0	8	0	0	0	9	0	25	0	0	7	0	0	0	0	0	0	0	0	0	0	0	0	10	75	0	0	0	0	3	0	0	0	0	0	0
cluster_7204	GIAGIGKT	3	0	0	0	0	0	0	0	0	0	0	0	0	0	0	0	0	0	0	0	0	0	0	0	0	0	0	0	4	0	0	0	0	0	0	6	0	0	0	0	0	0	5	0	0	0	0	0
cluster_7208	GIAGIGKT	3	0	0	0	0	0	0	0	0	0	0	0	0	0	0	0	31	0	23	0	0	0	0	0	0	0	0	0	2	0	10	0	4	0	0	5	111	2	0	6	5	4	6	0	4	0	1	9
cluster_7209	GIAGIGKT	3	0	0	0	0	0	0	0	0	0	0	0	0	0	0	0	0	0	0	0	0	0	0	0	0	0	0	0	0	0	0	0	0	0	0	0	0	0	0	0	0	0	0	0	0	0	0	0
cluster_7217	GIAGIGKT	3	0	0	0	0	0	0	0	0	0	0	0	0	0	0	0	0	0	0	0	0	0	0	0	0	0	0	0	0	0	0	0	0	0	0	6	0	1	0	0	0	0	0	0	0	0	0	1
cluster_7219	GIAGIGKT	3	0	0	0	0	0	0	0	0	0	0	0	0	0	0	0	0	0	0	0	0	0	0	0	0	0	0	0	0	0	0	0	0	0	0	0	0	0	0	0	0	0	0	0	0	0	0	0
cluster_7222	GIAGIGKT	3	0	0	0	0	0	0	0	0	0	0	0	0	0	0	0	0	0	14	1	0	0	0	0	0	0	0	0	0	0	0	0	0	1	0	3	0	0	0	0	2	0	1	0	0	0	2	9
cluster_7225	GVAGIGKT	4	0	0	0	0	0	0	0	0	4	0	2	0	3	0	0	0	0	0	0	0	0	0	0	0	0	0	1	2	0	0	0	0	0	0	13	0	0	0	0	0	0	0	0	0	0	0	1
cluster_7241	GIAGVGKT	1	11	3	5	20	24	18	21	18	69	12	0	47	27	67	35	34	13	19	48	3	2	31	12	2	0	3	0	2	5	0	7	3	3	12	4	115	0	3	0	3	19	2	4	2	0	0	6
cluster_7245	GIAGVGKT	1	25	9	0	18	31	24	28	20	24	36	48	58	43	17	19	22	13	23	13	1	11	44	12	10	40	46	1	28	41	15	9	11	5	12	7	244	22	5	22	3	44	1	8	9	9	6	17
cluster_7247	GIAGVGKT	1	0	0	0	0	0	0	0	0	0	2	0	0	0	0	0	0	1	0	0	0	0	0	0	0	0	0	0	0	0	0	0	0	0	18	0	210	0	0	0	0	1	0	14	0	0	2	1
cluster_7248	GIAGVGKT	1	0	0	0	0	0	0	0	0	0	0	0	0	2	0	0	0	0	0	0	0	0	0	0	0	0	2	0	0	0	0	0	0	0	0	0	103	0	0	1	0	28	0	1	0	0	0	28
cluster_7256	GIAGVGKT	1	0	0	0	0	0	0	0	0	0	2	0	3	0	2	2	2	0	0	6	0	0	0	1	0	3	1	0	2	0	0	0	3	2	1	3	137	1	0	0	0	1	0	2	1	2	0	10
cluster_7259	GIAGVGKT	1	0	0	0	0	0	0	0	0	0	0	0	82	0	22	0	0	0	0	0	0	0	0	0	17	0	0	0	0	0	2	0	0	0	0	0	115	0	0	0	1	2	6	0	0	2	0	17
cluster_7261	GIAGVGKT	1	0	0	0	2	1	1	0	0	0	6	0	4	0	5	0	0	0	0	0	0	0	0	0	0	0	0	0	1	0	0	0	0	0	0	0	3	0	0	0	0	0	0	0	0	0	1	2
cluster_7269	GIAGVGKT	1	0	0	0	0	0	0	0	0	0	0	0	23	0	0	0	0	33	0	0	3	0	0	0	0	0	0	0	0	8	9	0	0	2	0	0	54	0	0	2	0	0	0	0	0	0	0	0
cluster_7273	GIAGVGKT	1	0	0	0	0	0	0	0	0	0	0	43	50	0	0	0	0	0	0	36	0	0	0	0	1	33	30	0	0	0	0	0	0	0	0	0	87	0	0	0	0	7	0	0	0	0	0	0
cluster_7279	GIAGVGKT	1	0	0	0	0	0	0	0	0	0	3	4	1	0	0	0	0	1	0	1	0	0	0	0	8	0	0	0	1	4	2	1	3	0	2	1	20	0	5	2	2	1	0	3	0	2	0	0
cluster_7281	GIAGVGKT	1	22	14	8	21	25	27	22	15	43	36	22	26	13	9	15	20	10	12	41	2	8	6	9	13	18	15	0	2	12	10	6	3	2	6	2	136	12	1	7	9	29	4	2	3	17	5	19
cluster_7283	GIAGVGKT	1	1	0	2	0	0	0	0	0	2	32	6	0	8	13	9	0	15	17	8	2	0	7	8	0	0	0	0	0	0	0	0	9	0	0	1	54	1	0	8	2	0	0	0	1	0	0	16
cluster_7288	GIAGVGKT	1	0	0	0	0	0	0	0	0	4	6	8	0	8	0	0	8	0	0	6	0	0	0	0	0	0	0	0	3	6	9	0	1	0	0	3	51	1	4	7	4	6	0	1	8	0	0	0
cluster_7289	GIAGVGKT	1	0	0	0	0	0	0	0	0	0	22	0	38	18	42	22	0	0	1	0	3	0	30	1	0	0	0	0	2	2	7	1	0	2	3	6	179	1	5	0	1	0	5	0	4	0	0	1
cluster_7297	GVAGIGKS	2	0	0	0	0	0	0	0	0	0	0	0	0	0	0	0	0	0	0	0	0	0	0	0	0	0	0	0	0	0	4	5	7	7	1	0	57	7	0	3	0	0	0	6	0	0	0	0
cluster_7299	GVAGIGKS	2	0	0	0	0	0	0	0	0	0	0	0	0	0	0	0	0	0	0	0	0	0	0	4	0	0	0	0	0	0	0	0	0	0	0	0	44	0	0	0	0	1	0	0	0	0	2	0
cluster_7304	GVAGIGKS	2	0	0	0	0	0	0	0	0	0	0	0	0	0	0	0	0	0	0	0	0	0	0	0	0	0	0	0	0	0	0	0	0	0	0	0	0	0	0	0	0	0	0	0	0	0	0	0
cluster_7308	GVAGIGKS	2	0	0	0	0	0	0	0	0	0	0	0	0	0	0	0	0	0	0	0	0	0	0	0	0	0	0	1	0	0	0	0	0	0	0	0	0	0	0	0	0	0	0	0	0	0	0	0
cluster_7312	GVAGIGKS	2	0	0	0	0	0	0	0	0	0	0	0	0	0	0	0	0	0	0	3	0	0	0	0	0	0	0	0	0	0	0	3	0	0	4	0	48	0	2	0	0	1	0	0	0	0	0	3
cluster_7314	GVAGIGKS	2	0	0	0	0	0	0	0	0	2	5	1	3	0	3	0	1	1	0	0	0	0	0	0	1	0	0	0	0	0	0	5	2	0	0	0	42	0	0	0	0	0	0	0	0	0	0	1
cluster_7315	GVAGIGKS	2	0	0	0	0	0	0	0	0	11	0	0	0	0	0	9	0	4	0	0	0	0	0	0	0	0	0	0	0	0	0	0	0	0	0	0	55	0	0	0	0	0	0	0	0	0	1	0
cluster_7316	GVAGIGKS	2	0	0	0	0	0	0	0	0	0	0	0	0	0	0	0	0	0	0	0	0	0	0	0	0	0	0	0	0	0	0	0	0	0	0	0	66	0	1	0	1	0	0	0	0	0	1	2
cluster_7329	GVAGIGKS	2	2	1	0	2	1	4	1	4	2	17	3	6	5	22	1	0	11	11	4	1	0	17	2	0	0	0	0	1	1	3	1	2	3	1	1	87	4	2	5	1	0	2	0	4	0	0	10
cluster_7331	GVAGIGKS	2	0	0	0	0	0	0	0	0	0	0	0	0	0	0	0	0	0	0	0	0	0	0	0	0	1	0	0	0	0	0	0	0	5	3	0	94	0	3	1	0	0	5	2	1	0	0	0
cluster_7332	GVAGIGKS	2	1	8	0	3	7	9	4	10	0	0	0	0	0	0	0	1	0	0	5	0	0	0	5	0	0	0	1	0	0	0	0	0	0	5	0	31	0	0	1	0	5	1	4	4	0	3	0
cluster_7333	GVAGIGKS	2	0	0	4	0	0	0	10	0	0	12	0	43	8	28	7	23	0	0	0	0	1	31	3	0	20	18	0	0	0	0	0	0	11	0	0	107	8	14	0	0	21	5	0	0	11	0	0
cluster_7338	GVAGIGKS	2	4	7	6	8	6	4	8	8	4	0	0	2	0	1	0	17	0	0	2	0	1	1	0	0	0	0	0	0	3	1	3	0	0	11	0	63	0	1	2	0	0	2	0	1	0	0	0
cluster_7339	GVAGIGKS	2	0	0	0	0	0	0	0	0	30	25	34	13	21	0	6	0	0	0	5	0	14	7	0	0	0	0	0	0	2	4	3	20	1	0	6	107	1	1	2	1	5	2	0	0	0	3	9
cluster_7340	GVAGIGKS	2	0	0	0	0	0	0	0	0	0	0	0	0	0	0	0	0	0	0	0	0	0	0	0	0	0	0	0	0	0	0	0	0	4	1	0	46	8	0	0	0	0	0	1	0	0	3	0
cluster_7344	GVAGIGKS	2	29	13	20	15	44	28	35	22	0	63	80	26	26	10	0	2	0	16	0	0	3	19	18	0	0	0	0	5	10	8	0	9	10	10	3	264	7	1	0	6	5	11	8	10	0	6	7
cluster_7347	GVAGIGKS	2	0	0	0	0	0	0	0	0	0	0	0	0	0	0	0	0	0	0	0	0	0	0	0	0	2	1	0	0	0	0	0	0	0	0	0	55	0	0	0	0	0	0	0	0	7	0	0
cluster_7351	GVAGIGKS	2	0	0	0	0	0	0	0	0	0	0	0	0	0	0	12	0	0	0	0	0	4	0	0	0	0	0	0	0	0	0	0	0	0	0	0	48	0	1	0	0	0	3	0	0	0	0	0
cluster_7362	GVAGIGKS	2	0	0	0	0	0	0	0	0	0	0	0	0	0	0	0	0	0	0	0	0	0	0	0	0	0	0	0	0	0	0	0	0	0	0	0	41	0	0	0	0	0	0	1	0	0	0	0
cluster_7367	GVAGIGKS	2	0	0	0	0	0	0	0	0	0	0	0	0	0	0	0	0	0	0	0	0	0	0	0	0	0	0	0	0	0	0	0	0	0	0	0	11	0	0	0	0	0	0	0	0	0	0	0
cluster_7373	GVAGIGKS	2	0	0	0	0	0	0	0	0	0	0	0	0	0	0	0	0	0	0	0	0	0	0	0	0	0	0	0	5	7	0	5	0	0	0	0	80	0	0	0	0	0	0	0	0	0	0	0
cluster_7382	GVAGIGKS	2	0	0	0	0	0	0	0	0	1	0	0	33	0	26	0	0	0	0	0	0	0	0	0	0	0	0	0	3	5	3	0	0	0	1	0	77	0	1	1	0	0	1	0	8	0	1	8
cluster_7394	GVAGIGKS	2	0	0	0	0	0	0	0	0	0	0	0	0	0	0	0	0	0	0	0	0	0	0	0	0	0	0	0	0	6	7	0	0	0	0	0	65	0	0	0	0	0	0	0	0	0	0	0
cluster_7395	GVAGIGKS	2	0	0	0	0	0	0	0	0	0	0	0	0	0	0	0	0	0	0	0	0	0	0	0	0	0	0	0	0	0	0	0	0	0	0	0	1	0	0	0	0	0	0	0	0	0	0	0
cluster_7398	GVAGIGKS	2	0	0	1	0	0	0	0	0	0	0	0	0	0	0	0	0	0	0	0	0	0	8	0	0	0	0	0	0	1	0	1	0	0	0	2	88	0	1	6	1	1	0	0	0	1	0	10
cluster_7411	GVAGIGKS	2	0	0	0	0	0	0	0	0	14	0	0	1	0	0	0	35	0	0	0	0	13	18	17	0	0	0	0	0	0	5	0	0	0	0	0	70	0	0	0	0	0	0	0	0	0	2	3
cluster_7418	GVAGIGKS	2	0	0	0	0	0	0	0	0	0	0	0	18	16	0	0	0	4	0	12	0	10	0	0	0	0	0	0	14	13	13	0	6	0	0	0	83	18	5	1	5	13	6	3	6	5	2	21
cluster_7420	GVAGIGKS	2	0	0	0	0	0	0	1	0	0	0	0	0	0	0	0	0	0	0	0	0	3	0	0	0	0	0	0	0	0	0	0	0	5	0	0	79	0	1	0	0	0	0	0	0	0	0	0
cluster_7440	GIAGIGKT	3	0	0	0	0	0	0	0	0	5	0	0	0	0	0	0	0	0	0	0	0	0	0	0	0	0	0	0	0	0	0	0	3	0	0	0	75	0	0	1	2	0	0	1	0	0	0	0
cluster_7442	GIAGIGKT	3	2	0	1	1	2	2	0	6	1	0	0	1	0	0	0	1	0	0	0	0	0	0	0	4	0	1	0	1	2	0	1	0	1	1	0	169	1	0	1	1	2	0	6	1	3	1	1
cluster_7446	GIAGIGKT	3	5	3	1	3	6	11	10	3	20	6	18	0	17	6	0	5	0	5	13	0	2	24	4	0	19	28	0	3	1	0	0	0	5	0	11	54	4	0	1	0	10	1	1	7	1	1	0
cluster_7448	GIAGIGKT	3	0	0	2	0	0	0	0	0	4	5	0	0	2	0	3	5	3	0	0	0	2	0	6	0	0	0	0	0	0	0	0	0	0	0	2	100	0	0	0	0	2	10	0	0	0	0	0
cluster_7451	GIAGIGKT	3	0	0	0	0	0	0	0	0	0	0	0	0	0	0	0	0	0	0	0	0	0	0	0	0	0	0	0	0	0	0	0	0	0	0	0	0	0	0	0	0	0	0	0	0	0	0	0
cluster_7452	GIAGIGKT	3	0	0	0	0	0	0	0	0	0	0	0	3	0	4	5	2	0	0	0	0	0	0	0	0	0	0	0	3	0	8	0	1	0	0	1	49	1	0	1	1	3	2	0	0	0	0	0
cluster_7455	GIAGIGKT	3	0	0	0	0	0	0	0	0	0	3	0	13	3	0	0	6	0	0	0	0	0	4	0	0	0	0	1	4	16	8	10	3	2	3	4	78	11	0	5	8	8	0	0	1	0	6	0
cluster_7458	GIAGIGKT	3	0	0	22	0	0	0	0	0	7	9	1	9	2	0	9	0	0	20	0	0	0	5	0	4	3	1	0	0	3	4	5	0	0	0	2	119	1	0	4	0	10	0	0	0	2	5	9
cluster_7463	GIAGIGKT	3	1	0	0	0	0	0	0	1	0	1	0	0	0	0	0	0	0	0	0	0	0	0	0	0	0	0	0	0	0	0	1	0	2	0	0	77	0	2	3	5	11	0	0	6	13	1	0
cluster_7472	GIAGIGKT	3	0	0	0	0	0	0	0	0	0	1	1	0	1	0	0	0	0	0	0	0	0	0	0	0	0	0	1	3	14	11	1	4	8	3	9	75	2	4	4	7	14	3	4	10	8	2	3
cluster_7474	GIAGIGKT	3	0	0	0	0	0	0	0	0	0	0	0	0	0	0	0	0	0	0	0	0	0	0	0	0	9	7	1	0	0	0	0	0	5	1	0	171	0	6	4	0	0	0	1	0	0	0	0
cluster_7477	GIAGIGKT	3	0	0	0	0	0	0	0	0	0	0	0	0	0	0	0	0	0	0	0	0	2	0	0	0	0	0	0	0	0	0	0	0	0	0	0	71	0	1	0	0	0	0	0	0	0	0	0
cluster_7486	GIAGIGKT	3	0	0	0	0	0	0	0	0	0	0	0	0	0	0	0	0	0	5	0	0	0	0	0	0	0	0	0	1	2	0	0	0	0	0	0	55	0	2	1	0	0	0	0	0	0	0	7
cluster_7487	GIAGIGKT	3	2	0	0	0	0	1	0	3	0	0	0	0	0	0	0	0	0	0	0	0	0	0	0	0	0	0	0	1	2	0	0	0	0	0	0	6	0	0	0	0	0	1	0	0	0	1	0
cluster_7497	GIAGIGKT	3	19	16	3	30	29	29	21	43	59	86	23	88	0	42	1	1	18	94	53	1	16	21	15	36	0	0	2	4	0	0	0	0	1	0	18	112	4	0	2	0	10	2	0	7	4	1	6
cluster_7511	GIAGIGKT	3	0	0	0	0	0	0	0	0	0	0	0	0	0	0	0	0	0	0	0	0	0	0	0	0	0	0	0	1	0	0	0	0	4	0	1	74	0	0	0	0	1	0	0	0	1	0	0
cluster_7515	GIAGIGKT	3	3	1	0	1	2	3	2	0	0	0	0	1	0	0	0	0	0	0	0	0	0	0	0	3	0	0	0	5	3	6	5	2	0	5	0	59	10	3	2	4	0	6	2	2	1	0	0
cluster_7518	GIAGIGKT	3	18	7	3	10	13	15	14	18	17	5	5	3	4	0	5	12	6	10	0	2	0	16	14	9	11	10	0	0	7	0	3	5	7	4	1	240	5	2	3	3	3	0	6	8	1	0	16
cluster_7520	GIAGIGKT	3	0	0	0	0	0	0	0	0	0	0	0	0	0	0	0	0	0	0	0	0	0	0	0	0	0	0	0	1	0	0	0	0	0	0	0	9	4	0	0	0	0	0	0	0	0	0	0
cluster_7531	GIAGIGKT	3	0	0	2	0	0	0	0	0	0	0	3	1	0	3	1	0	0	0	0	0	0	1	0	1	0	0	0	0	0	0	0	0	0	0	0	102	0	1	1	0	0	0	0	0	0	0	0
cluster_7534	GIAGIGKT	3	0	0	0	0	0	0	0	0	0	0	0	0	0	0	0	0	0	0	0	0	0	0	0	0	1	0	0	0	0	0	0	0	0	0	0	99	0	1	0	1	2	1	3	0	6	0	2
cluster_7536	GIAGIGKT	3	0	0	0	0	0	0	0	0	0	0	0	0	0	0	0	0	0	0	0	0	0	1	0	0	0	0	0	0	0	0	0	0	0	0	0	47	0	0	0	0	0	0	0	0	0	0	1
cluster_7539	GIAGIGKT	3	0	0	0	0	0	0	0	0	0	0	0	0	1	1	0	0	0	0	0	0	0	1	0	0	0	1	0	3	0	0	0	0	0	0	1	87	0	0	0	0	0	0	6	0	0	0	0
cluster_7551	GIAGIGKT	3	0	0	0	0	0	0	0	0	0	0	0	0	0	0	0	0	0	0	1	0	0	0	0	0	0	0	0	0	10	0	0	0	0	2	10	205	9	1	0	1	3	0	5	4	8	1	0
cluster_7553	GIAGIGKT	3	0	0	0	0	0	0	0	0	0	0	0	0	0	0	0	0	0	7	0	0	0	0	5	0	0	0	0	0	4	2	0	0	0	1	0	37	0	0	0	1	0	0	0	0	2	0	0
cluster_7554	GIAGIGKT	3	0	0	0	0	0	0	0	0	0	0	0	0	0	0	0	0	0	0	0	0	0	0	0	0	0	0	0	1	0	0	0	0	0	0	0	20	0	0	0	0	0	0	0	1	0	0	0
cluster_7556	GIAGIGKT	3	0	0	0	0	0	0	0	0	0	0	0	0	20	0	0	0	0	0	17	0	0	16	0	0	0	0	0	0	0	0	0	0	0	0	0	152	0	1	0	4	0	0	5	0	0	0	0
cluster_7569	GIAGIGKT	3	0	0	0	0	0	0	0	0	2	10	0	6	3	3	17	0	2	0	6	0	0	7	0	0	0	0	0	0	0	0	0	0	0	0	0	50	0	0	0	0	1	0	0	0	0	0	0
cluster_7570	GIAGIGKT	3	0	0	0	0	0	0	0	0	23	1	1	0	24	0	0	0	0	0	0	0	0	4	2	0	11	11	0	5	8	8	0	0	8	0	0	84	0	1	0	0	0	9	3	1	0	1	0
cluster_7581	GIAGIGKT	3	0	0	0	0	0	0	0	0	0	0	0	0	0	0	0	0	0	0	0	0	0	0	0	0	0	0	0	0	0	0	0	0	0	0	0	73	8	0	1	0	1	8	2	5	0	0	0
cluster_7583	GIAGIGKT	3	0	0	0	0	0	0	0	0	0	0	0	0	0	0	0	0	0	0	0	0	0	0	0	0	0	0	0	0	0	0	0	0	4	0	0	56	0	0	0	0	0	0	3	0	0	0	0
cluster_7588	GIAGIGKT	3	0	0	0	0	0	0	0	0	4	4	0	0	9	0	3	3	8	0	7	0	5	4	0	0	0	0	0	0	0	9	0	0	0	0	0	80	0	0	0	0	1	1	0	0	2	0	2
cluster_7601	GIAGIGKT	3	0	0	0	0	0	0	0	0	0	0	0	0	0	0	0	0	0	0	0	0	0	0	0	0	0	0	0	0	0	0	0	0	0	0	0	60	0	0	0	0	0	0	0	0	0	0	0
cluster_7613	GIAGIGKT	3	0	0	0	0	0	0	0	0	0	0	0	0	0	0	0	0	0	0	0	0	0	0	0	0	0	0	0	0	0	0	0	0	0	0	0	1	0	0	0	0	0	0	0	0	0	0	0
cluster_7619	GIAGIGKT	3	0	0	0	0	0	0	0	0	0	0	0	0	0	0	0	0	0	0	0	0	0	0	0	0	0	0	0	0	0	0	0	0	0	5	0	82	0	0	5	0	0	3	0	0	0	1	1
cluster_7630	GVAGIGKT	4	0	0	0	0	0	0	0	0	0	0	0	0	0	0	0	0	0	0	0	0	0	0	0	0	0	0	0	0	0	1	1	0	2	0	1	18	0	4	0	0	0	0	0	0	0	0	0
cluster_7634	GVAGIGKT	4	3	3	2	5	6	10	8	6	0	0	0	0	0	0	0	0	0	0	4	0	0	0	2	0	0	0	0	1	12	6	0	0	1	3	6	50	11	2	2	6	5	1	4	4	5	0	5
cluster_7640	GVAGIGKT	4	2	5	3	3	5	7	3	3	0	1	0	0	0	0	0	1	0	0	0	0	0	0	0	1	0	0	0	4	4	4	1	0	0	3	0	98	3	0	0	3	6	3	0	2	2	0	2
cluster_7642	GVAGIGKT	4	0	0	0	0	0	0	0	0	0	16	8	0	0	14	0	0	0	0	0	0	0	0	0	13	0	0	0	0	0	1	0	0	0	0	0	40	0	0	0	0	1	0	0	0	0	0	4
cluster_7645	GVAGIGKT	4	3	2	1	1	2	5	1	2	3	4	6	13	17	10	10	10	12	7	7	1	13	12	2	5	1	0	0	2	8	2	7	3	4	1	1	104	7	1	1	2	0	3	5	4	4	0	12
cluster_7665	GVAGIGKT	4	0	0	0	0	0	0	0	0	1	10	0	3	0	0	0	0	4	1	1	0	0	6	2	0	12	16	0	0	0	0	7	10	4	0	8	77	10	0	1	0	15	7	4	6	1	2	3
cluster_7670	GVAGIGKT	4	0	0	0	0	0	0	0	0	0	0	0	0	0	0	0	0	0	0	0	0	0	0	0	0	0	0	0	0	0	0	0	0	0	0	0	19	0	0	0	0	0	3	0	0	0	0	0
cluster_7688	GIAGVGKT	1	0	0	2	0	0	0	0	0	0	0	0	0	0	0	5	0	0	0	2	0	0	0	0	0	0	0	0	0	0	0	0	0	0	0	0	0	9	0	0	0	0	0	0	0	5	0	0
cluster_7698	GIAGVGKT	1	0	0	0	0	0	0	0	0	0	0	0	0	0	0	0	0	0	0	0	0	0	0	0	0	0	0	0	0	0	0	0	0	0	0	0	0	16	0	0	0	0	0	0	8	0	0	0
cluster_7709	GVAGIGKS	2	0	0	0	0	0	0	0	0	0	0	0	0	0	0	0	0	0	0	0	0	0	0	0	0	0	0	0	0	0	8	0	0	0	0	0	1	8	5	0	0	0	0	0	0	9	4	0
cluster_7718	GVAGIGKS	2	0	0	10	0	0	0	12	0	0	3	0	0	0	5	0	0	0	6	2	0	1	3	0	1	0	0	0	5	0	8	0	0	0	0	0	12	14	0	3	1	1	0	0	16	0	0	1
cluster_7722	GVAGIGKS	2	0	0	0	0	0	0	0	0	0	0	0	0	0	0	0	0	0	0	0	0	0	0	0	0	0	0	0	0	0	0	0	0	0	0	0	0	21	0	0	0	0	5	0	0	1	0	0
cluster_7731	GVAGIGKS	2	0	0	0	0	0	0	0	0	0	0	0	0	0	0	0	0	0	0	0	0	0	0	0	0	0	0	0	0	0	0	0	0	0	0	0	0	8	0	0	0	0	0	0	0	9	0	0
cluster_7738	GVAGIGKS	2	0	0	0	0	0	0	0	0	3	0	0	0	0	0	8	11	9	0	0	0	6	20	0	0	0	0	1	0	0	0	0	2	0	0	0	0	2	0	0	0	0	0	0	0	2	0	0
cluster_7739	GVAGIGKS	2	0	0	0	0	0	0	0	0	0	0	0	0	0	0	0	0	0	1	1	0	0	0	0	0	0	0	0	0	0	0	0	0	0	0	0	0	4	0	0	0	0	0	0	0	0	0	0
cluster_7740	GVAGIGKS	2	0	0	0	0	0	0	0	0	0	0	0	0	0	0	0	0	0	0	0	0	0	0	0	0	0	0	0	0	0	0	0	0	0	0	0	0	0	0	0	0	0	0	0	0	0	0	0
cluster_7742	GVAGIGKS	2	0	0	0	0	0	0	0	0	0	0	0	0	0	0	0	0	11	0	0	0	0	0	0	0	0	0	0	0	6	0	0	9	0	0	7	0	27	0	1	0	9	0	3	0	0	0	1
cluster_7746	GVAGIGKS	2	0	0	0	0	0	0	0	0	0	0	0	0	0	0	0	0	0	0	0	0	0	0	0	0	0	0	0	0	5	7	5	0	3	0	0	0	9	0	0	0	7	0	0	0	0	0	8
cluster_7757	GVAGIGKS	2	0	0	0	0	0	0	0	0	0	0	0	0	0	0	0	0	0	0	0	0	0	0	0	0	0	0	1	0	0	0	0	2	0	0	0	0	11	0	0	0	0	0	3	0	0	0	0
cluster_7772	GVAGIGKS	2	0	0	4	0	0	0	0	0	0	0	0	1	1	1	0	0	1	0	0	0	0	0	0	0	1	0	0	0	0	0	0	0	0	0	0	0	1	0	0	0	0	0	1	0	0	0	0
cluster_7774	GIAGIGKT	3	0	0	0	0	0	0	0	0	0	0	0	0	0	0	0	0	0	0	0	0	0	0	0	0	0	0	0	2	0	2	0	0	1	0	0	32	8	0	0	0	0	0	5	0	1	0	2
cluster_7781	GIAGIGKT	3	0	0	0	0	0	0	0	0	0	0	0	0	0	1	0	0	0	0	0	0	0	0	0	0	0	0	0	0	0	0	0	0	0	0	0	0	1	0	0	0	0	0	0	0	0	0	7
cluster_7785	GIAGIGKT	3	0	0	0	0	0	0	0	0	0	0	0	0	0	0	0	0	0	0	0	0	0	0	0	0	0	0	0	0	0	0	0	0	0	0	5	1	7	0	1	0	1	0	0	0	0	2	0
cluster_7790	GIAGIGKT	3	0	0	0	0	0	0	0	0	0	0	0	0	0	0	0	0	0	0	0	0	0	0	0	0	0	0	0	0	0	0	0	0	0	0	0	0	8	0	0	0	0	0	0	1	0	0	0
cluster_7795	GIAGIGKT	3	0	0	0	0	0	0	0	0	0	0	0	0	0	0	0	0	0	0	0	0	0	0	0	0	0	0	0	0	0	0	0	0	0	0	0	0	5	0	0	0	0	0	4	5	0	0	0
cluster_7804	GIAGIGKT	3	0	0	4	0	0	0	0	0	0	10	0	0	0	0	0	0	0	0	0	1	0	0	6	0	0	0	0	0	0	0	0	0	0	3	0	0	5	0	0	0	0	0	0	2	0	0	0
cluster_7806	GIAGIGKT	3	3	1	5	3	11	7	6	5	0	0	0	0	0	0	0	0	0	0	6	0	0	0	0	0	0	0	0	5	6	0	1	1	0	1	1	24	8	0	0	3	8	0	0	5	5	1	9
cluster_7808	GIAGIGKT	3	0	0	0	0	0	0	0	0	0	0	0	0	0	0	0	0	0	0	0	0	0	0	0	0	0	0	0	1	1	0	3	0	0	0	0	0	0	1	1	0	0	1	0	0	0	0	0
cluster_7818	GIAGIGKT	3	0	0	0	0	0	0	0	0	0	0	0	0	0	0	0	0	0	0	0	0	0	0	0	0	0	0	0	0	0	0	0	0	0	0	0	0	3	0	0	0	0	0	0	0	0	0	0
cluster_7824	GIAGIGKT	3	0	0	0	0	0	0	0	0	0	0	0	0	0	0	0	0	0	0	0	0	0	0	0	0	0	0	0	0	0	0	0	0	0	0	0	0	6	0	0	0	0	0	0	0	0	0	0
cluster_7826	GIAGIGKT	3	0	0	0	0	0	0	0	0	0	1	1	2	1	3	1	0	3	0	1	0	0	1	2	0	0	1	0	0	0	0	0	0	0	0	1	0	11	0	0	0	0	0	0	1	0	0	0
cluster_7834	GVAGIGKT	4	0	0	0	0	0	0	0	0	19	53	7	21	14	21	16	2	41	8	19	0	0	6	0	8	17	16	0	0	0	0	1	0	1	5	10	27	17	3	3	1	6	4	5	3	8	1	11
cluster_7838	GVAGIGKT	4	0	0	0	0	0	0	0	0	0	0	0	0	0	0	0	0	0	0	0	0	0	0	0	0	0	0	0	0	4	0	0	0	0	0	0	0	11	0	6	0	0	2	0	0	0	2	1
cluster_7839	GVAGIGKT	4	0	0	0	0	0	0	0	0	0	0	0	0	0	0	0	0	0	0	0	0	0	0	0	0	0	0	0	0	0	0	0	0	0	0	0	0	0	0	0	0	0	0	0	0	0	0	0
cluster_7847	GVAGIGKT	4	0	0	0	0	0	0	0	0	0	0	0	0	0	0	0	0	0	0	0	0	0	0	0	0	0	0	0	0	0	0	0	0	0	0	5	0	5	1	0	0	0	0	1	0	2	2	0
cluster_7851	GVAGIGKT	4	5	1	0	0	0	0	0	0	0	0	0	0	0	0	0	0	0	0	3	0	0	0	0	0	0	0	0	0	0	0	0	0	0	0	0	0	3	0	0	0	0	0	0	0	0	0	1
cluster_7867	GIAGVGKT	1	0	0	0	0	0	0	0	0	0	0	0	0	7	0	0	0	0	0	0	0	0	0	0	0	0	0	0	0	0	0	0	0	0	0	0	0	0	2	0	0	0	0	0	0	0	0	0
cluster_7875	GVAGIGKS	2	0	0	0	0	0	0	0	0	0	0	0	0	0	0	0	0	0	0	0	0	0	0	0	0	0	0	0	0	0	0	0	0	0	0	0	0	0	5	0	0	0	0	0	0	0	0	0
cluster_7890	GVAGIGKS	2	0	0	0	0	0	0	0	0	0	0	0	4	0	3	0	5	0	9	0	0	0	1	0	11	6	4	0	2	12	0	4	0	0	0	1	23	0	1	1	0	0	0	0	0	0	0	2
cluster_7897	GVAGIGKS	2	0	0	3	0	0	0	0	0	10	24	16	0	4	3	0	4	10	8	12	0	6	7	0	0	11	15	0	0	1	0	0	0	5	1	2	13	0	6	0	1	3	0	1	1	0	0	15
cluster_7903	GVAGIGKS	2	0	0	0	0	0	0	0	0	33	0	0	0	0	1	0	0	0	0	3	0	0	0	0	3	0	0	0	0	0	17	0	0	0	0	0	1	0	10	3	0	19	1	1	8	3	4	0
cluster_7906	GVAGIGKS	2	0	0	0	0	0	0	0	0	24	0	0	31	0	24	0	0	0	14	0	0	0	0	0	0	0	0	0	5	8	11	2	6	2	0	1	1	0	6	1	0	11	9	0	4	5	0	0
cluster_7908	GVAGIGKS	2	0	0	0	0	0	0	0	0	0	0	0	0	0	0	0	0	0	0	0	0	0	0	0	0	0	0	0	0	4	1	0	0	0	0	0	0	0	5	0	0	0	0	1	0	0	0	0
cluster_7909	GVAGIGKS	2	0	0	0	0	0	0	0	0	0	0	0	0	0	0	0	0	0	0	0	0	0	0	0	0	0	0	0	0	0	0	0	0	0	0	0	0	0	0	0	0	0	0	0	0	0	0	0
cluster_7913	GIAGIGKT	3	0	0	0	0	0	0	0	0	0	0	0	0	0	0	0	0	0	0	0	0	0	0	0	0	0	0	0	0	0	0	0	0	0	0	0	3	0	1	0	0	0	0	0	0	0	0	0
cluster_7919	GIAGIGKT	3	0	0	0	0	0	0	0	0	0	1	0	0	0	0	0	0	2	1	0	0	1	1	2	0	0	0	0	0	0	0	0	0	0	0	0	1	0	2	0	2	0	0	0	0	0	0	0
cluster_7926	GIAGIGKT	3	0	0	0	0	0	0	0	0	0	0	0	1	0	2	0	0	1	1	1	0	0	0	0	2	0	0	0	0	0	0	0	0	0	0	0	0	0	3	0	0	0	0	0	0	0	0	4
cluster_7939	GVAGIGKT	4	0	0	0	0	0	0	0	0	0	0	0	0	0	0	0	0	0	0	0	0	0	0	0	0	0	0	0	0	0	0	0	0	0	0	0	0	0	0	0	0	0	0	0	0	0	0	0
cluster_7940	GVAGIGKT	4	0	0	0	0	0	0	0	0	0	0	0	0	0	0	0	0	0	0	0	0	0	0	0	0	0	0	0	0	0	0	0	0	0	0	2	0	3	6	0	0	0	0	6	0	2	1	0
cluster_7941	GVAGIGKT	4	5	1	0	2	1	13	0	0	11	8	0	23	15	16	1	0	1	8	21	1	1	24	2	0	15	12	0	6	15	2	4	3	3	4	9	46	2	6	7	3	6	5	3	3	4	4	20
cluster_7942	GVAGIGKT	4	0	0	0	0	0	0	1	0	8	18	4	9	4	14	16	8	10	4	8	1	0	8	3	2	9	8	0	2	0	0	0	5	5	0	4	24	2	10	2	1	8	5	3	5	12	8	6
cluster_7959	GIAGVGKT	1	0	0	0	0	0	0	0	0	4	7	0	16	3	5	1	1	6	10	4	0	7	25	0	2	1	3	0	0	2	0	0	1	1	3	0	0	1	0	0	0	0	2	1	0	0	0	1
cluster_7994	GIAGIGKT	3	0	0	0	0	0	0	0	0	0	0	1	0	3	3	0	1	1	0	1	0	0	0	0	0	0	0	0	0	1	0	0	0	0	0	0	6	0	0	6	0	0	0	0	0	0	0	4
cluster_7996	GIAGIGKT	3	0	0	0	0	0	0	0	0	0	0	0	0	0	0	0	1	13	0	0	0	0	0	0	0	14	9	0	0	0	0	0	0	0	1	0	28	0	0	6	1	0	0	0	0	0	4	0
cluster_7997	GIAGIGKT	3	0	0	0	0	0	0	0	0	0	1	0	1	0	0	0	6	0	0	0	1	1	1	0	0	0	0	0	0	0	0	17	0	0	0	3	0	0	1	9	0	0	0	7	0	7	4	1
cluster_8012	GIAGIGKT	3	0	5	1	0	1	1	2	2	0	0	0	0	0	0	0	0	0	0	1	0	0	0	1	0	0	0	0	1	1	4	1	5	3	0	3	19	4	0	5	3	1	1	0	0	0	1	0
cluster_8021	GVAGIGKT	4	0	0	0	0	0	0	0	0	0	0	0	0	0	0	0	0	0	0	0	0	0	0	0	0	0	0	0	1	0	0	0	2	1	0	0	0	0	0	3	0	7	0	1	0	5	1	26
cluster_8023	GVAGIGKT	4	0	0	0	0	0	0	0	0	0	0	0	0	0	0	0	3	0	0	0	0	0	0	0	0	0	0	0	0	0	0	0	0	0	0	0	0	0	0	4	0	0	6	1	1	1	0	1
cluster_8026	GVAGIGKT	4	2	2	1	4	0	0	3	0	0	0	0	0	0	0	0	0	0	0	0	0	0	0	0	0	0	0	0	0	0	0	0	0	0	0	0	0	0	0	3	0	0	0	0	2	0	0	0
cluster_8036	GIAGVGKT	1	0	0	0	0	0	0	0	0	0	0	0	0	0	0	0	0	0	0	0	0	0	0	0	0	0	0	0	0	0	0	0	7	0	0	0	0	0	0	0	9	9	0	1	0	0	0	0
cluster_8053	GVAGIGKS	2	0	0	0	0	0	0	0	0	0	0	0	0	0	0	0	0	0	0	0	0	8	0	0	0	0	0	0	0	0	0	0	4	0	0	0	0	0	0	4	4	0	0	1	0	0	0	0
cluster_8057	GVAGIGKS	2	0	0	0	0	0	0	0	0	0	0	0	0	0	0	1	0	0	0	0	0	0	0	0	0	0	0	0	0	0	0	0	0	0	0	0	1	0	0	0	3	0	0	0	0	0	0	0
cluster_8063	GVAGIGKS	2	0	0	0	0	0	0	0	0	0	0	0	0	0	0	0	0	0	0	0	0	0	0	0	0	0	0	0	0	0	0	0	0	0	0	0	0	0	0	0	0	0	0	0	0	0	0	0
cluster_8070	GVAGIGKS	2	0	0	0	0	0	0	0	0	0	0	0	0	0	0	0	0	0	0	0	0	0	0	0	0	0	0	0	0	0	0	0	0	0	0	0	0	0	0	0	1	0	0	0	0	0	0	0
cluster_8073	GVAGIGKS	2	0	0	0	0	0	0	0	0	0	0	0	0	0	0	0	0	0	0	0	0	0	0	0	0	0	0	0	0	6	0	0	0	0	0	0	0	0	2	0	6	0	0	0	0	0	0	0
cluster_8076	GIAGIGKT	3	0	1	0	0	0	0	0	0	0	0	0	0	0	0	0	0	0	0	0	0	0	0	0	0	0	0	0	0	0	0	1	0	0	0	0	0	0	1	0	6	0	0	0	0	0	0	1
cluster_8081	GIAGIGKT	3	0	0	0	0	0	0	0	0	2	1	1	2	0	0	2	0	0	1	1	0	0	5	0	0	0	0	1	0	0	0	0	0	0	0	4	1	2	3	0	5	4	0	0	2	0	0	0
cluster_8089	GIAGIGKT	3	1	0	0	0	1	0	0	0	0	0	0	0	1	0	0	0	0	0	0	0	0	0	0	0	0	0	0	0	3	0	0	0	0	0	0	2	7	0	0	5	7	0	0	4	0	6	0
cluster_8094	GIAGIGKT	3	0	0	0	0	0	0	0	0	0	0	14	0	0	0	0	0	1	0	0	0	0	33	0	0	0	0	0	0	0	3	0	0	0	0	0	0	0	0	0	4	0	0	6	0	0	0	0
cluster_8095	GIAGIGKT	3	0	0	0	0	0	0	0	0	0	0	0	0	0	0	0	0	0	0	0	0	0	1	0	0	0	0	0	0	0	3	7	4	2	0	0	73	0	1	0	11	4	5	2	8	0	3	0
cluster_8320	GVAGIGKT	4	0	0	0	0	0	0	0	0	0	1	1	0	0	1	0	0	0	0	0	0	0	4	0	0	2	2	0	0	0	0	0	0	5	0	0	0	0	0	0	0	14	0	0	0	5	1	2
cluster_8332	GIAGVGKT	1	0	0	0	0	0	0	0	0	0	0	0	0	0	0	0	0	0	0	0	0	0	0	0	0	0	0	0	0	0	0	0	0	0	0	0	0	0	0	0	0	0	0	0	0	0	0	0
cluster_8344	GIAGVGKT	1	0	0	0	0	0	0	0	0	1	1	3	25	1	0	13	15	2	0	0	0	0	10	0	0	1	0	0	0	0	0	0	0	0	2	4	0	0	0	4	0	0	4	0	0	0	0	3
cluster_8360	GIAGVGKT	1	0	0	0	0	0	0	0	0	2	11	3	1	7	2	2	0	1	1	0	1	1	2	4	3	3	6	0	3	7	4	0	4	2	0	2	0	0	0	0	0	5	4	0	4	0	0	1
cluster_8368	GVAGIGKS	2	0	0	0	0	0	0	0	0	0	0	0	1	0	1	0	1	0	0	0	0	0	0	0	0	0	0	0	0	0	0	0	0	0	0	0	0	3	0	0	0	0	3	0	0	0	0	0
cluster_8376	GVAGIGKS	2	0	0	0	0	0	0	0	0	0	0	0	0	0	0	0	0	0	0	0	0	0	0	0	0	0	0	1	2	0	0	0	5	3	0	4	0	5	2	0	5	3	9	0	0	0	2	0
cluster_8382	GVAGIGKS	2	0	0	0	0	0	0	0	0	0	0	0	0	0	0	0	0	0	0	0	0	0	0	0	0	0	0	0	0	0	0	0	0	0	0	0	0	0	0	0	0	0	1	0	0	0	0	0
cluster_8386	GVAGIGKS	2	0	0	0	0	0	0	0	0	0	0	0	0	0	0	0	0	0	0	1	0	14	10	0	0	0	0	0	2	8	0	0	0	0	1	1	1	0	0	0	7	15	5	0	1	0	0	0
cluster_8390	GVAGIGKS	2	0	0	0	0	0	0	0	0	0	0	0	0	0	0	0	0	0	0	0	0	0	0	0	0	0	0	0	0	0	0	0	0	4	0	0	0	6	2	0	0	0	6	0	1	0	0	3
cluster_8394	GVAGIGKS	2	13	7	5	5	12	19	13	17	0	0	0	0	0	0	9	0	1	11	0	0	0	0	3	0	0	0	0	1	0	0	0	0	0	0	0	0	3	2	0	1	0	5	0	0	1	3	7
cluster_8395	GVAGIGKS	2	0	0	1	0	0	0	0	0	0	5	0	0	0	0	0	0	0	3	9	1	9	0	1	0	0	0	0	0	0	0	0	0	0	0	0	0	0	0	0	0	0	7	0	0	0	0	0
cluster_8397	GVAGIGKS	2	0	0	0	0	0	0	0	0	1	10	0	27	17	32	8	0	0	11	0	0	0	12	0	0	1	1	0	0	0	0	0	0	0	0	0	2	0	1	2	0	0	4	0	0	0	0	6
cluster_8411	GVAGIGKS	2	0	0	0	0	0	0	0	0	0	0	1	1	0	0	0	0	0	0	0	0	0	0	0	0	0	0	0	0	0	0	0	0	0	0	0	0	0	0	0	0	0	0	0	0	0	0	0
cluster_8414	GVAGIGKS	2	0	0	0	0	0	0	0	0	1	0	1	0	0	0	0	0	0	0	5	0	0	1	6	0	0	0	0	0	0	0	0	0	0	2	0	1	0	0	0	0	0	14	0	0	0	1	0
cluster_8416	GVAGIGKS	2	0	0	0	0	0	0	0	0	0	0	0	0	0	0	7	0	0	0	6	0	0	0	0	8	0	0	1	0	0	0	0	0	0	0	4	11	0	0	0	0	0	9	0	0	1	0	0
cluster_8428	GIAGIGKT	3	0	0	0	0	0	0	0	0	0	0	0	0	0	0	0	0	0	0	1	0	0	0	0	0	0	0	0	0	0	0	5	1	0	0	0	0	0	0	0	0	0	8	0	0	0	0	0
cluster_8436	GIAGIGKT	3	0	0	0	0	0	0	0	0	0	0	0	0	0	0	0	0	0	0	0	0	0	0	0	0	0	0	0	0	0	0	0	0	0	0	0	0	0	0	0	0	0	0	0	0	0	0	0
cluster_8438	GIAGIGKT	3	0	0	0	0	0	0	0	0	0	0	0	0	0	0	0	0	0	0	0	0	0	0	0	0	0	0	1	2	0	1	3	0	0	0	0	0	0	0	0	0	0	5	0	0	1	0	0
cluster_8450	GIAGIGKT	3	0	0	0	0	0	0	0	0	0	0	0	0	0	0	0	0	0	0	0	0	5	0	0	0	0	0	0	0	0	0	0	0	2	0	0	0	0	0	0	0	0	10	1	0	0	0	0
cluster_8457	GIAGIGKT	3	0	0	0	0	0	0	0	0	0	0	0	0	0	0	0	0	0	1	0	0	4	0	0	0	0	0	0	2	0	0	3	0	0	1	0	0	0	0	0	0	0	4	0	0	1	0	0
cluster_8460	GIAGIGKT	3	0	0	0	0	0	0	0	0	0	0	0	0	0	0	0	0	0	0	0	0	0	0	0	0	0	0	0	0	0	0	3	0	0	0	0	0	0	0	0	0	7	4	0	0	0	0	0
cluster_8465	GIAGIGKT	3	0	0	0	0	0	0	0	0	8	3	0	81	0	21	22	0	0	0	0	0	0	0	0	1	4	5	1	0	0	0	0	0	5	0	0	6	0	0	3	0	1	7	0	4	0	0	1
cluster_8471	GIAGIGKT	3	0	0	0	0	0	0	0	0	0	0	0	0	0	0	9	11	0	0	0	0	0	7	0	0	0	0	0	0	0	0	7	0	0	0	0	0	0	0	0	0	0	9	0	6	0	0	0
cluster_8474	GIAGIGKT	3	0	0	0	0	0	0	0	0	0	0	0	0	0	0	0	0	0	0	0	0	0	0	0	0	0	0	0	0	0	0	0	0	0	0	0	0	0	0	0	0	0	5	0	0	0	0	0
cluster_8479	GVAGIGKT	4	0	0	0	0	0	0	0	0	0	0	0	0	0	0	0	0	0	0	0	0	0	0	0	0	0	0	0	0	0	0	0	0	0	0	0	0	0	0	0	0	0	20	7	0	0	0	0
cluster_8481	GVAGIGKT	4	0	0	0	0	0	0	9	0	0	1	0	0	0	0	0	0	0	0	0	0	0	1	1	4	0	0	0	0	0	0	0	0	0	0	0	0	0	0	0	0	0	0	0	0	0	0	0
cluster_8485	GVAGIGKT	4	0	0	0	0	0	0	0	0	0	0	0	0	0	0	0	0	0	0	0	0	0	0	0	0	0	0	0	1	0	0	0	0	0	1	0	0	0	0	0	0	0	13	2	0	0	0	0
cluster_8486	GVAGIGKT	4	0	0	0	0	0	0	0	0	36	0	0	10	0	0	0	0	0	0	0	0	0	8	2	5	1	1	0	3	2	0	0	1	0	1	0	0	0	0	2	2	0	8	3	0	0	1	4
cluster_8512	GIAGVGKT	1	0	0	0	0	0	0	0	0	2	2	4	5	0	10	0	4	3	1	8	0	1	2	0	0	2	1	0	0	0	2	0	0	0	0	0	2	0	0	0	0	0	0	1	0	0	0	0
cluster_8513	GIAGVGKT	1	0	0	0	0	2	2	2	2	0	15	0	1	0	8	4	7	7	10	0	0	2	1	0	2	4	6	0	1	0	8	5	3	0	0	2	42	5	2	0	3	3	10	3	3	6	0	6
cluster_8518	GIAGVGKT	1	0	0	9	0	1	0	0	0	1	8	1	5	13	13	7	5	5	11	0	1	16	15	12	3	2	3	1	10	8	15	3	9	8	11	10	102	0	1	0	5	13	14	4	11	0	2	21
cluster_8538	GVAGIGKS	2	0	0	0	0	0	0	0	0	0	12	0	0	0	0	0	0	0	0	0	0	0	0	0	0	1	4	0	0	0	0	0	0	0	1	0	0	0	0	0	0	0	0	0	0	0	0	0
cluster_8565	GIAGIGKT	3	0	0	0	0	0	0	0	0	0	9	0	0	0	0	0	0	0	0	0	0	0	0	0	0	0	0	0	3	0	2	0	3	1	3	0	0	0	0	1	0	0	4	1	0	2	0	0
cluster_8576	GVAGIGKT	4	0	0	0	0	0	0	0	0	0	0	0	0	0	0	0	0	0	0	0	0	0	0	0	0	0	0	0	0	0	0	0	0	0	0	0	0	0	0	0	0	0	0	7	0	0	3	0
cluster_8625	GVAGIGKS	2	0	0	0	0	0	0	0	0	5	0	0	0	0	2	0	0	0	0	0	0	0	0	0	0	0	0	0	0	0	0	0	0	1	0	0	0	0	0	0	0	0	0	0	7	0	0	4
cluster_8628	GVAGIGKS	2	0	0	0	0	0	0	0	0	0	0	0	0	0	0	0	1	0	0	0	0	0	0	0	0	0	0	0	0	0	0	0	0	0	0	1	0	0	0	0	0	0	0	0	2	0	0	0
cluster_8644	GVAGIGKS	2	0	0	0	0	0	0	0	0	20	10	0	0	22	0	14	24	15	0	0	0	28	6	0	0	0	0	0	2	2	0	4	0	0	0	2	0	3	1	0	0	0	5	0	8	0	0	0
cluster_8648	GVAGIGKS	2	0	0	0	0	0	0	0	0	0	0	0	0	0	0	0	0	0	0	0	0	0	0	0	0	0	0	0	0	0	0	0	0	1	0	0	0	0	0	0	0	0	0	0	2	0	0	0
cluster_8663	GVAGIGKS	2	0	0	0	0	0	0	0	0	0	0	0	0	0	0	0	0	0	0	0	0	0	0	0	0	0	0	0	0	0	0	0	0	0	0	0	0	1	0	0	0	1	0	0	0	1	0	0
cluster_8669	GIAGIGKT	3	11	20	3	17	30	30	18	35	0	0	0	0	0	0	0	0	0	0	0	0	0	0	0	0	0	0	0	0	0	0	6	0	0	0	0	58	0	4	0	3	1	0	0	5	0	0	0
cluster_8696	GIAGIGKT	3	0	0	0	0	0	0	0	0	0	0	0	0	0	0	0	0	0	0	0	0	0	0	0	0	0	0	0	0	0	0	0	0	0	0	0	0	0	0	0	0	0	0	0	0	0	0	0
cluster_8719	GVAGIGKT	4	0	0	0	0	0	0	0	0	0	0	0	0	0	0	0	0	0	0	0	0	0	0	0	0	0	0	0	0	0	0	0	0	0	0	0	0	0	0	0	0	0	0	0	1	0	0	0
cluster_8721	GVAGIGKT	4	0	0	0	0	0	0	0	0	0	0	0	0	0	0	0	0	0	0	0	0	0	0	0	0	0	0	0	0	0	0	0	0	0	0	0	0	0	0	1	0	0	0	0	10	0	0	0
cluster_8744	GIAGVGKT	1	0	0	0	0	0	0	0	0	0	0	0	0	0	0	0	0	0	0	0	0	0	0	0	1	0	0	0	0	0	0	0	0	0	0	0	0	0	0	0	0	0	0	0	0	9	0	0
cluster_8753	GVAGIGKS	2	0	0	0	0	0	0	0	0	0	1	0	0	0	0	1	2	2	0	0	0	0	0	0	0	0	0	0	0	0	0	0	0	0	0	0	0	0	0	0	0	0	0	0	0	2	0	1
cluster_8760	GVAGIGKS	2	0	5	1	3	0	0	0	0	0	0	0	0	0	0	0	0	0	0	0	0	0	0	0	0	0	0	0	2	0	3	0	0	0	0	0	0	0	0	0	0	0	0	0	3	5	0	0
cluster_8763	GVAGIGKS	2	0	0	0	0	0	0	0	0	0	0	0	0	0	0	0	0	0	0	0	0	0	0	0	0	0	0	0	0	0	4	0	0	0	0	0	0	0	0	6	0	0	0	0	0	2	0	1
cluster_8771	GVAGIGKS	2	0	0	0	0	0	0	0	0	0	0	0	0	0	0	0	0	0	0	0	0	0	0	0	0	0	0	0	0	0	0	0	0	0	0	0	0	0	0	0	0	0	0	0	0	7	0	0
cluster_8901	GIAGVGKT	1	0	0	0	0	0	0	0	0	0	4	0	5	4	1	0	1	1	0	0	0	2	0	0	0	0	0	0	0	0	0	0	0	0	0	0	0	0	0	0	0	0	0	0	0	0	0	26
cluster_8905	GIAGVGKT	1	0	0	0	0	0	0	0	0	0	0	0	0	0	0	0	0	0	0	0	0	0	0	0	0	0	0	0	0	0	0	0	0	0	0	0	0	0	0	0	0	0	0	0	0	0	0	0
cluster_8922	GVAGIGKS	2	0	0	0	0	0	0	0	0	0	0	0	0	0	0	0	0	0	0	0	0	0	0	0	0	0	0	0	0	0	0	0	0	0	0	0	0	0	0	0	0	0	0	0	0	0	0	17
cluster_8942	GVAGIGKS	2	0	0	0	0	0	0	0	0	0	0	0	0	0	0	1	0	6	0	0	1	0	1	0	0	0	0	0	0	0	0	0	0	0	0	2	0	0	0	0	0	0	0	0	0	0	0	0
cluster_8965	GVAGIGKS	2	0	0	0	0	0	0	0	0	0	0	0	0	0	0	0	0	8	0	0	0	0	1	0	0	0	0	0	0	0	0	0	2	0	0	0	0	0	0	0	0	0	0	0	0	0	0	4
cluster_8999	GVAGIGKS	2	0	0	0	0	0	0	0	0	0	0	0	0	0	0	0	0	0	0	0	0	0	0	0	0	0	0	0	0	0	0	0	0	0	0	0	0	0	0	0	0	0	0	0	0	0	0	12
cluster_9010	GVAGIGKS	2	0	0	0	0	0	0	0	0	0	0	0	0	0	0	0	0	0	0	0	0	0	0	0	0	0	0	0	0	0	0	0	0	0	0	0	0	0	0	0	0	0	0	0	0	0	0	0
cluster_9016	GVAGIGKS	2	0	0	0	0	0	0	0	0	1	3	1	1	0	0	4	0	0	0	0	1	0	0	2	0	3	2	0	0	0	0	0	0	0	0	2	0	0	0	3	0	1	0	0	1	0	0	15
cluster_9052	GIAGIGKT	3	0	0	0	0	0	0	0	0	0	0	0	1	62	0	0	0	0	0	0	5	0	0	0	0	0	0	0	0	0	0	0	0	0	0	2	0	0	0	1	0	2	0	0	0	2	0	11
cluster_9101	GIAGIGKT	3	0	0	0	0	0	0	0	0	0	0	0	0	0	0	5	0	0	0	0	0	0	0	0	0	0	0	0	0	0	0	0	0	0	0	0	0	0	0	0	0	0	0	0	0	0	0	9
cluster_9102	GIAGIGKT	3	0	0	0	0	0	0	0	0	0	0	0	0	0	0	0	0	0	0	0	0	0	0	0	0	0	0	0	0	0	0	0	0	0	0	0	0	0	0	0	0	0	0	0	0	0	0	8
cluster_9107	GIAGIGKT	3	0	0	0	0	0	0	0	0	0	0	0	0	0	0	0	0	0	0	0	0	0	0	0	0	0	0	0	0	0	0	0	0	0	0	0	0	0	0	0	0	0	0	0	0	0	0	0
cluster_9109	GIAGIGKT	3	0	0	0	0	0	0	0	0	0	0	0	0	0	0	0	0	0	0	0	0	0	0	0	0	0	0	0	0	0	0	0	0	0	0	0	0	0	0	0	0	0	0	0	0	0	0	0
cluster_9110	GIAGIGKT	3	0	0	0	0	0	0	0	0	0	0	0	0	0	0	0	0	0	0	0	0	0	0	0	0	0	0	0	0	0	1	0	1	0	0	0	0	0	0	0	0	0	0	1	0	0	0	11
cluster_9130	GIAGIGKT	3	0	0	0	0	0	0	0	0	0	0	0	0	0	0	0	0	0	0	0	0	0	0	0	2	0	0	0	0	0	0	0	0	0	0	0	0	0	0	0	0	0	0	0	0	0	0	4
cluster_9137	GVAGIGKT	4	0	0	0	0	0	0	0	0	0	0	0	0	0	0	0	0	0	0	0	0	0	0	2	0	0	0	0	0	0	0	0	0	0	0	0	0	0	0	0	0	0	0	0	0	0	0	6
cluster_9139	GVAGIGKT	4	0	0	0	0	0	0	0	0	0	0	0	0	0	0	0	0	0	0	0	0	0	0	0	0	0	0	0	0	0	0	0	0	0	0	0	0	0	0	0	0	0	0	0	0	0	0	0
cluster_9163	GVAGIGKT	4	0	0	0	0	0	0	8	0	2	12	8	1	0	6	0	8	0	0	0	1	0	2	0	0	0	0	0	2	8	0	4	2	0	1	0	0	0	0	0	1	0	4	1	0	0	1	7
cluster_9174	GIAGVGKT	1	0	0	0	0	0	0	0	0	0	0	0	0	0	0	0	0	0	0	0	0	0	0	0	0	0	0	0	0	0	0	0	0	0	0	0	0	0	0	0	0	0	0	0	0	0	0	0
cluster_9195	GIAGVGKT	1	0	0	0	0	0	0	0	0	0	0	0	0	0	0	0	0	0	0	0	0	0	0	0	0	0	0	0	0	0	0	0	0	0	0	0	0	0	0	0	0	0	0	0	0	0	0	0
cluster_9213	GIAGVGKT	1	0	0	0	0	0	0	0	0	1	0	0	0	0	0	0	0	0	0	0	0	0	0	0	0	0	0	0	0	0	0	0	0	0	0	0	0	0	0	0	0	0	0	0	0	0	0	7
cluster_9216	GIAGVGKT	1	0	0	0	0	0	0	0	0	0	0	0	0	0	0	0	0	0	0	0	0	0	0	0	0	0	0	0	0	0	0	0	0	0	0	0	0	0	0	0	0	0	0	0	0	0	0	0
cluster_9241	GVAGIGKS	2	0	0	0	0	0	0	0	0	0	3	0	0	0	0	0	0	0	0	0	0	0	0	0	0	0	0	0	0	0	0	0	0	0	0	0	0	0	0	0	0	0	0	0	0	0	0	0
cluster_9255	GVAGIGKS	2	0	0	0	0	0	0	0	0	0	0	0	0	0	0	0	0	0	0	0	0	0	0	0	0	0	0	0	0	0	0	0	0	0	0	0	0	0	0	0	0	0	0	0	0	0	0	0
cluster_9259	GVAGIGKS	2	0	0	0	0	0	0	0	0	0	0	0	0	0	0	0	0	0	0	0	0	0	0	0	0	0	0	0	0	0	0	0	0	0	0	0	0	0	0	0	0	0	0	0	0	0	0	0
cluster_9267	GVAGIGKS	2	9	5	0	9	15	17	12	13	5	0	0	0	0	0	0	11	0	0	3	0	0	5	0	0	0	0	0	0	0	0	0	0	0	0	0	0	0	0	4	0	0	0	0	0	1	0	10
cluster_9269	GVAGIGKS	2	0	0	0	0	0	0	0	0	0	0	0	0	0	0	0	0	0	0	0	0	0	0	0	0	0	0	0	0	0	0	0	0	0	0	0	0	0	0	0	0	0	0	0	0	0	0	0
cluster_9293	GVAGIGKS	2	0	0	0	0	0	0	0	0	11	0	0	0	0	0	0	0	0	0	0	0	0	0	0	0	0	0	0	0	0	0	0	0	0	0	0	0	0	0	0	2	0	0	0	0	0	4	0
cluster_9304	GVAGIGKS	2	0	0	0	0	0	0	0	0	0	22	0	0	0	0	0	0	0	0	0	0	0	18	0	0	0	0	0	0	0	0	0	0	0	0	0	0	0	0	0	0	0	0	0	0	0	0	0
cluster_9316	GIAGIGKT	3	0	0	0	0	0	0	0	0	0	0	4	16	0	12	0	0	0	0	0	0	0	10	0	0	0	0	0	0	0	0	0	0	1	0	0	0	0	0	0	0	0	0	0	1	0	0	0
cluster_9342	GIAGIGKT	3	0	0	0	0	0	0	0	0	0	0	0	0	0	0	0	0	0	0	0	0	0	0	0	0	0	0	0	0	0	0	0	0	0	0	0	0	0	0	0	0	0	0	0	0	0	0	4
cluster_9346	GIAGIGKT	3	0	0	0	0	0	0	0	0	3	0	0	0	5	0	0	0	0	0	0	2	0	0	2	4	0	0	0	0	0	0	0	0	0	0	0	49	0	0	0	0	0	0	1	0	0	1	0
cluster_9368	GIAGIGKT	3	0	0	0	0	0	0	0	0	0	0	1	1	0	2	0	1	0	2	2	0	0	0	0	0	0	0	0	0	0	0	0	0	0	0	0	0	0	0	0	0	0	0	0	0	0	0	0
cluster_9374	GIAGIGKT	3	0	0	0	0	0	0	0	0	0	0	0	1	0	0	0	0	0	0	0	0	0	0	0	0	0	0	0	0	0	0	0	0	0	0	0	0	0	0	0	0	0	5	0	0	0	0	0
cluster_9379	GIAGIGKT	3	0	0	0	0	0	0	0	0	0	0	0	0	0	0	0	0	0	0	0	0	0	0	0	0	0	0	0	0	0	0	0	0	0	0	0	0	0	0	0	0	0	0	0	0	0	0	0
cluster_9395	GIAGIGKT	3	0	0	0	1	0	0	0	1	0	0	0	0	0	0	0	0	0	0	0	0	0	0	0	0	0	0	0	1	1	0	1	0	0	0	0	0	0	0	0	0	0	0	0	0	0	0	3
cluster_9427	GVAGIGKT	4	0	0	0	0	0	0	0	0	0	0	0	0	0	0	0	0	0	0	0	0	0	0	0	0	0	0	0	0	0	0	0	0	0	0	0	0	0	0	0	0	0	0	0	0	0	0	0
cluster_9429	GVAGIGKT	4	11	8	11	10	0	0	13	0	0	0	0	0	0	0	0	0	0	0	0	0	0	1	0	2	0	0	0	0	0	0	0	0	0	0	0	0	0	0	0	0	0	0	0	0	0	0	0
cluster_9440	GIAGVGKT	1	0	0	0	0	0	0	0	0	0	0	0	0	0	0	0	0	0	0	0	0	0	0	0	0	0	0	0	0	0	0	0	0	0	0	5	0	0	0	0	0	8	0	0	0	0	0	6
cluster_9462	GIAGVGKT	1	0	0	0	0	0	0	0	0	0	24	71	0	24	2	7	2	0	0	0	4	0	3	0	7	1	1	0	4	13	1	5	0	5	6	1	2	0	6	0	0	4	1	0	3	0	0	7
cluster_9473	GIAGVGKT	1	0	0	0	0	0	0	0	0	0	2	0	2	0	2	1	6	2	0	0	0	0	6	0	0	0	0	0	0	0	0	0	0	0	0	0	0	0	0	0	0	0	0	0	0	0	0	1
cluster_9475	GVAGIGKS	2	0	0	0	0	0	0	0	0	0	0	0	0	0	0	0	0	0	0	0	0	0	0	0	0	0	0	0	0	0	0	0	0	0	0	0	0	0	0	0	0	0	0	0	0	0	0	0
cluster_9509	GVAGIGKS	2	0	0	0	0	0	0	0	0	0	0	0	0	0	0	0	0	0	0	0	0	0	0	0	0	0	0	0	0	0	0	0	0	0	0	0	0	0	0	0	0	0	0	0	0	0	0	14
cluster_9511	GVAGIGKS	2	0	0	0	0	0	0	0	0	0	0	0	0	0	0	4	0	0	0	0	0	0	0	0	0	0	0	0	0	0	0	0	0	0	0	0	0	0	0	0	0	0	3	0	0	0	0	4
cluster_9524	GVAGIGKS	2	0	0	0	0	0	0	0	0	0	0	0	0	0	0	0	0	0	0	0	0	0	0	0	0	0	0	0	0	0	0	0	0	0	0	0	0	0	0	0	0	0	0	0	0	0	0	0
cluster_9526	GVAGIGKS	2	6	3	0	0	10	8	3	4	0	0	0	0	0	0	0	19	0	0	0	2	0	0	13	0	0	1	0	6	2	0	0	0	1	0	0	0	0	0	0	0	0	0	0	0	0	0	0
cluster_9529	GVAGIGKS	2	0	0	0	0	0	0	0	0	2	0	0	0	0	0	0	29	0	0	0	0	0	0	0	0	0	0	0	0	0	0	0	0	0	0	0	0	0	0	0	0	0	0	0	0	0	0	0
cluster_9530	GVAGIGKS	2	0	0	0	0	0	0	0	0	0	0	0	0	0	0	0	0	0	0	0	0	0	0	0	0	0	0	0	0	0	0	0	0	0	0	0	0	0	0	0	0	0	0	0	0	0	0	0
cluster_9562	GVAGIGKS	2	0	0	0	0	0	0	0	0	0	1	0	0	0	0	0	0	0	0	0	0	0	0	0	0	1	0	0	0	0	0	0	0	0	0	0	0	0	0	0	0	0	0	0	0	0	0	1
cluster_9566	GIAGIGKT	3	0	0	0	0	0	0	0	0	1	0	0	0	0	0	0	0	0	0	0	0	0	0	0	0	0	0	0	0	0	0	0	0	0	0	0	0	0	0	0	0	0	0	0	0	0	0	0
cluster_9571	GIAGIGKT	3	0	0	0	0	0	0	0	0	0	0	0	0	0	0	0	0	0	0	0	0	0	0	0	0	0	0	0	0	0	0	0	0	0	0	0	0	2	1	0	0	0	0	3	0	0	3	0
cluster_9606	GIAGIGKT	3	0	0	0	0	0	0	0	0	0	0	0	3	0	0	0	0	0	0	0	0	0	0	0	0	0	0	0	0	0	0	0	0	0	0	0	0	0	0	0	0	0	0	0	0	0	0	9
cluster_9615	GIAGIGKT	3	0	0	0	0	0	0	0	3	0	0	0	0	0	0	0	0	0	0	0	0	0	0	0	0	0	0	0	0	0	0	0	0	0	0	0	0	0	0	0	0	0	0	0	0	0	0	2
cluster_9628	GIAGIGKT	3	0	0	0	0	0	0	0	0	0	17	0	18	25	0	10	0	0	0	0	0	0	0	0	0	0	0	0	0	0	0	0	0	0	0	0	0	0	0	0	0	0	0	0	0	0	0	16
cluster_9659	GIAGIGKT	3	0	0	0	0	0	0	0	0	0	0	0	0	0	0	0	0	0	0	0	0	0	0	0	0	0	0	0	0	0	0	0	0	0	0	0	0	0	1	2	0	0	0	1	2	0	0	0
cluster_9698	GVAGIGKT	4	0	0	0	0	0	0	0	0	0	0	0	0	0	0	0	0	0	0	0	0	0	0	0	3	0	0	0	0	0	0	0	0	0	0	0	0	0	0	0	2	0	0	0	0	0	0	0
cluster_9704	GIAGVGKT	1	0	0	0	0	0	0	0	0	0	0	0	0	0	6	0	1	1	15	0	0	9	0	0	3	0	0	0	0	0	0	0	0	0	0	0	0	0	0	0	0	0	0	0	0	0	0	5
cluster_9709	GIAGVGKT	1	0	0	0	0	0	0	0	0	0	6	0	0	0	0	0	0	0	0	0	1	3	1	0	0	0	0	0	0	0	0	0	0	0	0	0	21	0	0	0	0	0	0	0	0	0	0	8
cluster_9733	GIAGVGKT	1	0	0	0	0	0	0	0	0	0	0	0	0	0	0	0	0	0	0	0	0	0	0	0	0	0	0	0	0	0	3	0	0	0	0	0	0	0	0	0	0	0	0	0	0	0	0	0
cluster_9793	GVAGIGKS	2	0	0	0	0	0	0	0	0	3	0	0	0	0	10	7	0	0	0	0	0	0	2	0	0	7	8	0	0	0	0	0	0	0	0	0	0	0	0	0	0	0	0	0	0	0	0	0
cluster_9800	GIAGIGKT	3	0	0	0	0	0	0	0	0	0	0	0	0	0	0	0	0	0	0	0	0	0	0	0	0	0	1	0	0	0	0	0	0	0	0	0	0	0	0	0	0	0	0	0	0	0	0	0
cluster_9830	GIAGIGKT	3	0	0	0	0	0	0	0	0	0	0	0	0	0	0	0	0	0	0	0	0	0	0	0	0	0	0	0	0	0	0	1	0	0	0	0	0	0	0	0	0	5	0	0	0	1	0	0
cluster_9867	GIAGIGKT	3	0	0	0	0	0	0	0	0	0	0	0	0	0	0	0	0	0	0	0	0	0	0	0	0	0	0	0	0	0	0	0	0	0	0	0	0	0	0	0	0	0	0	0	0	0	0	0
cluster_1006n	GIAGIGKT	3	0	0	0	0	0	0	0	0	0	0	0	0	0	0	0	0	0	0	0	0	0	0	0	0	0	0	0	0	0	0	0	0	0	0	0	0	0	0	0	0	0	0	0	0	0	0	0
cluster_1009n	GIAGIGKT	3	0	15	9	18	0	0	0	0	0	0	2	0	0	0	0	1	0	0	1	0	1	0	0	1	0	0	0	0	0	0	0	0	0	0	0	0	0	4	0	0	0	0	0	0	0	0	0
cluster_10304n	GVAGIGKS	2	0	0	0	0	0	0	0	0	0	47	0	0	0	0	0	0	11	0	0	0	0	0	0	0	1	1	0	0	10	0	0	5	0	0	1	0	0	0	0	0	8	0	3	4	0	0	3
cluster_1037n	GIAGIGKT	3	0	0	0	0	0	0	0	0	0	0	0	0	0	0	0	0	0	0	0	0	0	0	0	0	0	0	0	0	0	0	0	0	0	0	0	0	0	0	0	0	0	0	0	0	0	0	0
cluster_1039n	GVAGIGKS	2	12	17	14	20	29	14	8	39	17	15	15	8	10	12	1	0	1	6	0	0	0	12	4	1	0	1	1	0	0	0	0	1	1	0	0	2	0	1	0	0	0	1	0	0	1	0	0
cluster_10564n	GVAGIGKT	4	0	0	0	0	0	0	0	0	1	0	39	0	33	0	0	0	0	0	0	0	0	0	0	0	0	0	0	5	0	0	0	0	0	0	17	0	0	0	0	0	0	0	0	1	0	0	0
cluster_10724n	GIAGVGKT	1	0	0	0	0	0	0	0	0	0	0	3	0	0	0	0	0	0	0	0	0	0	0	0	0	0	0	0	0	1	1	0	0	0	0	0	8	0	0	0	1	0	1	0	0	0	0	0
cluster_10757n	GVAGIGKT	4	0	0	0	0	0	0	0	0	0	0	0	0	0	0	0	0	0	0	0	0	0	0	0	0	0	0	0	0	0	0	0	0	0	0	0	0	0	0	0	0	0	0	0	0	0	0	0
cluster_10832n	GVAGIGKS	2	0	0	0	0	0	0	0	0	0	0	8	0	7	0	0	0	0	0	0	0	0	0	0	0	0	0	0	0	0	0	0	0	0	0	0	0	0	0	0	0	0	0	0	0	0	0	0
cluster_10837n	multiple	multiple	0	0	0	0	0	0	0	0	0	0	0	0	0	0	0	0	0	0	0	0	0	0	0	0	0	0	0	0	0	0	0	0	0	0	0	0	0	0	0	0	0	0	0	0	0	0	0
cluster_10885n	GVAGIGKS	2	28	15	10	44	41	35	33	31	0	0	0	0	0	0	0	0	0	0	0	0	0	0	0	0	0	0	0	0	0	0	0	0	0	0	0	0	0	0	0	0	0	0	0	0	0	0	6
cluster_10972n	GVAGIGKS	2	0	0	0	0	0	0	0	0	3	0	6	3	0	0	0	0	0	0	0	0	1	0	0	0	5	3	0	5	0	0	1	3	0	4	0	24	0	4	4	3	0	0	6	0	1	0	0
cluster_11049n	GVAGIGKS	2	0	0	0	0	0	0	0	1	1	0	0	0	0	0	0	0	0	4	0	0	0	0	0	0	0	0	0	0	0	0	0	0	0	0	0	0	0	0	0	0	0	0	0	0	0	0	0
cluster_11100n	GVAGIGKT	4	0	0	0	0	0	0	0	0	60	16	0	1	1	32	0	0	0	26	1	0	0	7	0	0	0	0	0	0	0	0	0	0	0	0	0	0	0	0	0	1	0	0	0	2	0	0	0
cluster_11240n	GIAGVGKT	1	0	0	0	0	0	0	0	0	0	0	0	0	0	0	0	0	0	0	0	0	0	0	0	0	0	0	0	0	0	0	0	0	0	0	0	0	0	0	0	0	0	0	0	0	0	0	0
cluster_11292n	multiple	multiple	0	0	0	0	0	0	0	0	0	0	0	0	0	0	0	0	0	0	0	0	0	0	0	0	1	0	0	0	0	0	0	0	0	0	0	0	0	0	0	0	0	0	0	0	0	0	1
cluster_11343n	GIAGIGKT	3	10	12	4	8	10	21	13	13	2	0	0	0	0	0	0	0	0	0	0	0	0	0	0	0	0	0	0	0	0	0	0	0	0	0	0	0	0	0	0	0	0	0	0	0	0	0	9
cluster_11453n	GVAGIGKS	2	0	0	0	0	0	0	0	0	0	0	0	0	0	0	0	0	0	0	0	0	0	0	0	0	0	0	0	0	0	0	0	0	0	0	0	0	0	0	0	0	0	0	0	0	0	0	0
cluster_11470n	GIAGIGKT	3	0	0	0	0	0	0	0	0	0	0	0	0	0	0	0	0	0	0	0	0	0	0	0	0	0	0	0	0	0	0	0	0	0	0	0	0	0	0	0	0	0	0	0	0	0	0	0
cluster_11716n	GVAGIGKS	2	0	0	0	0	0	0	0	0	0	0	0	0	0	0	0	0	0	0	0	0	0	0	0	0	0	0	0	0	0	0	0	0	0	0	0	0	0	0	0	0	0	0	0	0	0	0	0
cluster_11753n	GVAGIGKT	4	0	0	0	0	0	0	0	0	0	0	0	0	0	0	0	0	0	0	0	0	0	0	0	0	0	0	0	0	0	0	0	0	0	0	0	0	0	0	0	0	0	0	0	0	0	0	0
cluster_11928n	GIAGIGKT	3	0	0	0	0	0	0	0	0	0	6	0	6	0	0	1	1	3	5	1	0	1	0	0	4	8	3	0	0	0	0	0	0	0	0	0	0	0	0	0	0	0	0	0	0	0	0	0
cluster_12083n	GVAGIGKS	2	0	0	0	0	0	0	0	0	0	0	0	0	0	0	0	0	0	0	0	0	0	0	0	0	0	0	0	0	0	0	0	0	0	0	0	0	0	0	0	0	0	0	0	0	0	0	0
cluster_1211n	multiple	multiple	0	0	0	0	0	0	0	0	0	0	0	0	0	0	0	0	0	0	0	0	0	0	0	0	0	0	0	0	0	0	0	0	0	0	0	0	0	0	0	0	0	0	0	0	0	0	0
cluster_12133n	multiple	multiple	0	0	0	0	0	0	0	0	0	0	0	0	0	0	0	0	0	0	0	0	0	0	0	0	0	0	0	0	0	0	0	0	0	0	0	0	0	0	0	0	0	0	0	0	0	0	0
cluster_1231n	GIAGIGKT	3	8	8	5	18	17	35	11	11	0	0	0	0	0	0	0	0	5	0	0	0	0	8	0	0	0	0	0	0	0	0	0	0	0	0	0	0	0	0	0	0	0	0	0	0	0	0	7
cluster_123376n	GIAGIGKT	3	0	0	0	0	0	0	0	0	0	0	0	0	0	0	0	0	0	0	0	0	0	0	0	0	0	0	0	0	0	0	0	0	0	0	0	0	0	0	0	0	0	0	0	0	0	0	0
cluster_12382n	GIAGIGKT	3	0	0	0	0	0	0	0	0	0	0	8	0	0	0	0	0	0	0	0	0	0	15	0	0	0	0	0	0	0	0	0	0	0	1	0	0	0	0	0	0	7	0	0	0	0	1	2
cluster_12488n	GVAGIGKS	2	0	0	0	0	0	0	0	0	0	0	11	0	19	0	2	10	0	0	14	0	0	4	4	0	0	0	0	1	0	0	2	0	0	4	0	25	0	0	0	1	0	0	1	0	0	0	7
cluster_12596n	GVAGIGKS	2	0	0	0	0	0	0	0	0	0	0	0	0	0	0	0	0	0	0	0	0	0	0	0	0	0	0	0	0	0	0	0	0	0	0	0	0	0	0	0	0	0	0	0	0	0	0	0
cluster_12665n	GIAGIGKT	3	9	0	0	6	29	25	30	0	0	0	0	1	0	1	1	0	0	1	0	0	0	0	0	0	0	0	0	7	7	5	3	0	0	4	10	0	10	0	0	1	11	0	0	7	0	0	25
cluster_12888n	GVAGIGKT	4	0	0	0	0	0	0	0	0	0	10	0	0	6	0	0	0	0	9	0	0	0	0	0	0	0	0	0	0	0	0	0	0	0	0	0	0	0	0	0	0	0	0	0	0	0	0	1
cluster_1288n	GVAGIGKT	4	1	4	3	2	1	3	4	5	0	0	2	0	0	0	1	1	0	0	0	0	0	0	0	0	0	0	0	0	0	0	0	0	0	0	0	0	0	0	0	0	0	0	0	0	0	0	0
cluster_12974n	multiple	multiple	0	0	0	0	0	0	0	0	0	0	0	0	0	0	0	0	0	0	0	0	0	0	0	0	0	0	0	0	0	0	0	0	0	0	0	0	0	0	0	0	0	0	0	0	0	0	0
cluster_13229n	GVAGIGKT	4	0	0	0	0	0	0	0	0	0	0	0	0	0	0	0	0	0	0	0	0	0	0	0	0	0	0	0	0	1	0	0	1	0	0	0	0	0	0	0	0	2	0	0	0	0	0	0
cluster_13274n	GVAGIGKT	4	0	0	0	0	0	0	0	0	0	0	0	0	0	0	0	0	0	0	0	0	0	0	0	0	0	0	0	0	0	0	0	0	0	0	0	0	0	0	0	0	0	0	0	0	0	0	0
cluster_13326n	GVAGIGKT	4	0	0	0	0	0	0	0	0	0	0	0	0	0	0	0	0	0	0	0	0	0	0	0	0	0	0	0	0	0	0	0	0	0	0	0	0	0	0	0	0	0	0	0	0	0	0	0
cluster_13566n	GVAGIGKS	2	0	0	0	0	0	0	0	0	0	0	0	0	0	0	0	0	0	0	0	0	0	0	0	0	0	0	0	0	0	0	0	0	0	0	0	0	0	0	0	0	0	0	0	0	0	0	0
cluster_13583n	multiple	multiple	0	0	0	0	0	0	0	0	3	0	2	0	0	0	3	0	0	0	0	0	0	1	0	1	0	0	0	0	0	0	0	0	0	0	0	0	0	0	0	0	0	0	0	0	0	0	0
cluster_13676n	multiple	multiple	0	0	0	0	0	0	0	0	0	0	0	0	0	0	0	0	0	0	0	0	0	0	0	0	0	0	0	0	0	0	0	0	0	0	0	0	0	0	0	0	0	0	0	0	0	0	0
cluster_1367n	GIAGVGKT	1	76	27	18	34	90	90	79	75	0	2	1	0	0	0	0	2	0	0	0	0	0	0	0	2	1	0	0	2	4	1	4	0	0	0	0	4	3	1	1	2	4	6	2	5	0	1	2
cluster_13847n	GIAGIGKT	3	0	0	0	0	0	0	0	0	0	0	0	0	0	0	0	0	0	0	0	0	0	0	0	0	0	0	0	0	0	0	0	0	0	0	0	0	0	0	0	0	0	0	0	0	0	0	0
cluster_13935n	GIAGIGKT	3	0	0	0	0	0	0	0	0	16	19	1	54	0	0	29	29	10	0	0	1	18	26	0	10	0	0	0	0	6	3	0	0	0	0	2	0	0	0	1	2	1	0	4	0	0	2	13
cluster_14033n	GIAGIGKT	3	0	0	0	0	0	0	0	0	0	0	0	6	3	3	0	0	0	0	0	0	0	4	0	1	0	0	0	2	7	7	5	1	0	0	4	45	0	0	1	0	7	5	0	12	4	0	0
cluster_1419n	GIAGIGKT	3	0	0	0	0	0	0	0	0	0	0	0	0	0	0	0	0	0	0	0	0	0	0	0	0	0	0	0	0	0	0	0	0	0	0	0	0	0	0	0	0	0	0	0	0	0	0	0
cluster_14232n	GVAGIGKS	2	2	0	0	0	7	10	1	3	0	0	0	0	0	0	0	0	0	0	0	0	0	0	0	0	0	0	0	0	0	0	0	0	0	0	0	0	0	0	0	0	0	0	0	0	0	0	0
cluster_14299n	GVAGIGKS	2	0	0	0	0	0	0	0	0	0	0	0	0	0	0	0	0	0	0	0	0	0	0	0	0	0	0	0	0	0	0	0	0	0	0	0	0	0	0	0	0	0	0	0	0	0	0	0
cluster_14408n	multiple	multiple	0	0	0	0	0	0	0	0	0	0	0	0	0	0	0	0	0	0	0	0	0	0	0	0	0	0	0	0	0	0	0	0	0	0	0	0	0	0	0	0	0	0	0	0	0	0	0
cluster_1449n	GIAGIGKT	3	2	1	4	0	7	3	2	1	0	0	0	0	1	0	0	0	0	1	0	0	0	0	0	1	0	0	0	0	0	0	0	0	0	0	0	0	0	0	0	0	0	0	0	0	0	0	0
cluster_14507n	GVAGIGKS	2	0	0	0	0	0	0	0	0	0	0	0	0	0	0	0	0	0	0	0	0	0	0	0	0	0	0	0	0	0	0	0	0	0	0	0	0	0	0	0	0	0	0	0	0	0	0	0
cluster_14521n	GIAGIGKT	3	0	0	11	0	0	0	0	0	0	1	0	1	1	0	0	2	24	0	25	0	0	19	8	36	57	66	0	0	14	11	1	0	5	0	0	0	9	0	0	0	0	0	0	0	2	0	10
cluster_14594n	GIAGIGKT	3	0	0	0	0	0	0	0	0	0	23	0	0	1	0	20	0	0	0	0	0	0	0	2	0	0	1	0	0	0	0	0	2	0	0	0	0	0	2	0	3	0	0	0	0	0	0	1
cluster_14615n	multiple	multiple	0	0	0	0	0	0	0	0	0	0	0	0	0	0	0	0	0	0	0	0	0	0	0	0	0	0	0	0	0	0	0	0	0	0	0	0	0	0	0	0	0	0	0	0	0	0	0
cluster_14633n	GIAGIGKT	3	0	0	0	0	0	0	0	0	0	0	0	0	0	0	0	0	0	0	0	0	0	0	0	0	0	0	0	0	0	0	0	0	0	0	0	0	0	0	0	0	0	0	0	0	0	0	0
cluster_14678n	GVAGIGKS	2	0	0	0	0	0	0	0	0	0	1	0	17	0	0	0	0	0	0	0	2	0	5	0	0	0	0	0	2	2	0	0	0	4	3	0	77	3	2	1	1	0	0	0	0	1	0	0
cluster_14731n	GIAGIGKT	3	0	0	0	0	0	0	0	0	0	0	0	0	0	0	0	0	0	0	0	0	0	0	0	0	0	0	0	0	0	0	0	0	0	0	0	0	0	0	0	0	0	0	0	0	0	0	0
cluster_14782n	GVAGIGKS	2	0	0	0	0	0	0	0	0	0	0	0	0	0	0	0	0	0	0	0	0	0	0	0	0	0	0	0	0	9	0	12	0	0	0	8	0	0	0	1	0	16	0	0	0	0	0	6
cluster_14830n	GVAGIGKS	2	0	0	0	0	0	0	0	0	0	0	0	0	0	0	0	0	0	0	0	0	0	0	0	0	0	0	0	0	0	0	6	0	0	0	5	0	0	0	0	0	13	0	0	0	0	0	0
cluster_14854n	GVAGIGKS	2	0	0	0	0	0	0	0	0	0	0	0	0	0	0	0	0	0	0	0	0	0	0	0	0	0	0	0	0	0	0	0	0	0	0	0	0	0	0	0	0	0	0	0	0	0	0	0
cluster_1488n	GIAGIGKT	3	2	0	0	0	0	0	0	0	0	0	0	0	0	0	0	0	0	0	0	0	0	0	0	0	0	0	0	0	0	0	0	0	0	0	0	0	0	0	0	0	0	0	0	0	0	0	0
cluster_14907n	GVAGIGKT	4	0	0	0	0	0	0	0	0	0	0	0	0	0	0	0	0	0	0	0	0	0	0	0	0	0	0	0	0	0	0	0	0	0	0	0	0	0	0	0	0	0	0	0	0	0	0	0
cluster_15079n	GVAGIGKT	4	0	0	0	0	0	0	0	0	0	0	0	0	0	0	0	0	0	0	0	0	0	0	0	0	0	0	0	0	0	0	0	0	0	0	0	0	0	0	0	0	0	0	0	0	0	0	0
cluster_15163n	GVAGIGKS	2	0	0	0	0	0	0	0	0	0	0	0	0	0	0	0	0	0	0	0	0	0	0	0	0	0	0	0	0	0	0	0	0	0	0	0	0	0	0	0	0	0	0	0	0	0	0	0
cluster_15294n	GIAGIGKT	3	0	0	0	0	0	0	0	0	0	0	0	0	0	0	0	0	0	0	0	0	0	0	0	0	0	0	0	0	0	0	0	0	0	0	0	5	0	0	0	0	0	0	0	0	0	0	0
cluster_15310n	GVAGIGKS	2	0	0	0	0	0	0	0	0	0	0	0	0	0	0	0	0	0	0	0	0	0	0	0	0	0	0	0	0	0	0	0	0	0	0	0	0	0	0	0	0	0	0	0	0	0	0	0
cluster_15375n	GVAGIGKT	4	0	0	0	0	0	0	0	0	0	0	0	0	0	0	0	0	0	0	0	0	0	0	0	0	0	0	0	0	0	0	0	0	0	0	0	0	0	0	0	0	0	0	0	0	0	0	0
cluster_15435n	GIAGVGKT	1	0	0	0	0	0	0	0	0	0	0	0	0	0	0	0	0	0	0	0	0	0	0	0	9	0	0	0	0	0	0	0	0	14	0	0	0	0	0	0	0	0	0	0	5	0	0	0
cluster_15445n	GVAGIGKS	2	0	0	0	0	0	0	0	0	0	0	0	0	0	1	0	0	2	0	0	0	0	0	0	0	0	0	0	0	0	0	16	0	0	0	0	66	0	0	0	0	0	0	0	0	0	5	0
cluster_15456n	GVAGIGKS	2	0	0	0	1	0	0	1	0	0	0	0	0	0	0	0	0	0	0	0	0	0	0	0	0	0	0	0	0	0	0	0	0	0	0	0	0	0	0	0	0	0	0	0	0	0	0	0
cluster_15734n	GIAGIGKT	3	0	0	0	0	0	0	0	0	0	0	0	0	0	0	0	0	0	0	0	0	0	0	0	0	0	0	0	0	0	0	0	0	0	0	0	0	0	0	0	0	0	0	0	0	0	0	0
cluster_15789n	GIAGIGKT	3	0	0	0	0	0	0	0	0	0	0	0	0	0	0	0	0	0	0	0	0	0	0	0	0	0	0	0	0	0	0	0	0	0	0	0	0	0	0	0	0	0	0	0	0	0	0	0
cluster_15796n	GIAGVGKT	1	0	10	6	9	0	0	0	0	0	0	0	0	0	0	0	0	0	0	0	0	0	0	0	0	0	0	0	0	0	0	0	0	0	0	0	0	0	0	0	0	0	0	0	0	0	0	0
cluster_1595n	GIAGIGKT	3	0	0	0	0	0	0	0	0	0	0	0	0	0	0	0	0	0	0	0	0	0	0	0	0	0	0	0	0	0	0	0	0	0	0	0	0	0	0	0	0	0	0	0	0	0	0	0
cluster_16001n	GIAGIGKT	3	0	0	0	0	0	0	0	0	0	0	0	0	0	0	0	0	0	0	0	0	0	0	0	0	0	0	0	0	0	0	0	0	0	0	0	0	0	0	0	0	0	0	0	0	0	0	0
cluster_16009n	GVAGIGKS	2	0	0	0	0	0	0	0	0	0	0	0	0	0	0	0	0	0	0	0	0	0	0	0	0	0	0	0	0	0	0	0	0	0	0	0	0	0	0	0	0	0	0	0	0	0	0	0
cluster_16090n	GVAGIGKT	4	0	0	0	0	0	0	0	0	0	0	0	0	0	0	0	0	0	0	0	0	0	0	0	0	0	0	0	0	0	0	0	0	0	0	0	0	0	0	0	0	0	0	0	0	0	0	0
cluster_16108n	GIAGVGKT	1	0	0	0	0	0	0	0	0	0	0	0	0	0	0	0	0	0	0	0	0	0	0	0	0	0	0	0	0	0	0	0	0	0	0	0	0	0	0	0	0	0	0	0	0	0	0	0
cluster_16123n	GVAGIGKS	2	0	0	0	0	0	0	0	0	0	0	0	0	0	0	0	0	0	0	0	0	0	0	0	0	0	0	0	0	0	0	0	0	0	0	0	0	0	0	0	0	0	0	0	0	0	0	0
cluster_16163n	GIAGIGKT	3	3	5	5	7	6	10	5	10	0	0	1	0	0	0	0	0	0	0	0	0	0	0	0	0	1	0	0	0	0	0	0	0	0	0	0	5	0	2	0	0	0	0	0	0	0	0	0
cluster_16200n	GIAGVGKT	1	2	4	0	3	6	5	1	3	0	0	0	0	0	0	0	0	0	0	0	0	0	1	3	0	0	0	0	1	4	3	2	0	0	1	0	18	1	0	0	0	1	0	1	0	2	0	0
cluster_16210n	GVAGIGKT	4	0	0	0	0	0	0	0	0	0	0	0	0	0	0	0	0	0	0	0	0	0	0	0	0	0	0	0	0	0	0	0	0	0	0	0	0	0	0	0	0	0	0	0	0	0	0	0
cluster_16261n	GIAGIGKT	3	3	2	0	3	10	8	4	1	0	15	2	7	0	0	0	7	5	6	0	0	1	0	2	5	0	2	0	2	1	2	13	4	6	3	19	350	5	2	1	4	35	2	2	7	28	10	0
cluster_16280n	multiple	multiple	0	0	0	0	0	0	0	0	0	0	0	0	0	0	0	0	0	0	0	0	0	0	0	0	0	0	0	0	0	0	0	0	0	0	0	0	0	0	0	0	0	0	0	0	0	0	0
cluster_1629n	GVAGIGKS	2	0	0	0	0	0	0	0	0	0	0	0	0	0	0	0	0	0	0	0	0	0	0	0	0	0	0	0	0	0	0	0	0	0	0	0	0	0	0	0	0	0	0	0	0	0	0	0
cluster_16304n	GIAGIGKT	3	0	0	0	0	0	0	0	0	0	0	0	0	0	0	0	0	9	0	0	0	0	0	0	0	12	16	0	0	0	0	0	0	0	0	0	80	0	0	0	0	8	0	1	13	0	0	1
cluster_16352n	GVAGIGKS	2	0	0	0	0	0	0	0	0	24	1	0	0	0	0	0	0	0	0	0	0	0	0	0	0	0	0	0	4	0	0	0	5	0	0	0	0	0	0	0	0	0	0	0	0	0	2	0
cluster_1640n	GVAGIGKS	2	0	0	0	0	0	0	0	0	0	0	0	0	0	0	0	0	0	0	0	0	0	0	0	0	0	0	0	0	0	0	0	0	0	0	0	0	0	0	0	0	0	0	0	0	0	0	0
cluster_16494n	GIAGIGKT	3	0	0	0	0	0	0	0	0	4	0	5	41	2	32	40	15	12	0	18	0	0	4	0	11	13	12	0	0	0	0	1	0	0	0	0	0	0	0	0	0	0	0	1	0	0	0	0
cluster_16501n	GVAGIGKS	2	0	0	0	0	0	0	0	0	0	0	0	0	0	0	0	0	0	0	0	0	0	0	0	0	0	0	0	0	0	0	0	0	0	0	0	0	0	0	0	0	0	0	0	0	0	0	0
cluster_16519n	multiple	multiple	0	0	0	0	0	0	0	0	0	0	0	0	0	0	0	0	0	0	0	0	0	0	0	0	0	0	0	0	0	0	0	0	0	0	0	0	0	0	0	0	0	0	0	0	0	0	0
cluster_16521n	GIAGIGKT	3	0	0	0	0	0	0	0	0	0	0	0	0	0	0	0	0	0	0	0	0	0	0	0	0	0	0	0	0	0	0	5	0	2	6	0	0	4	1	0	0	0	7	0	10	6	0	4
cluster_16568n	GVAGIGKS	2	0	0	0	0	0	0	0	0	0	0	0	0	0	0	0	0	0	0	0	0	0	0	0	0	0	0	0	0	7	0	0	0	0	2	0	0	0	0	0	2	7	0	0	1	0	0	2
cluster_16637n	multiple	multiple	0	0	0	0	0	0	0	0	0	0	0	0	0	0	0	0	0	0	0	0	0	0	0	0	0	0	0	0	0	0	0	0	0	0	0	0	0	0	0	0	0	0	0	0	0	0	0
cluster_16657n	GVAGIGKS	2	9	2	1	4	6	9	6	3	3	12	8	9	4	11	8	8	2	0	2	0	4	5	3	10	3	7	0	1	0	0	0	5	1	3	0	13	0	0	2	0	0	0	2	0	0	0	0
cluster_16704n	GVAGIGKT	4	0	0	0	0	0	0	0	0	0	0	0	0	0	0	0	40	0	0	0	0	0	0	0	0	0	0	0	0	0	0	0	0	0	0	0	0	0	0	0	0	0	0	0	0	0	0	0
cluster_16803n	GIAGIGKT	3	13	0	12	0	0	0	0	0	0	0	0	0	0	0	0	0	0	0	0	0	0	0	0	0	0	0	0	0	0	0	0	0	0	0	0	0	0	0	0	0	6	0	0	0	0	0	0
cluster_16931n	GVAGIGKS	2	0	0	0	0	0	0	0	0	0	0	0	0	0	0	0	0	0	0	0	0	0	0	0	0	0	0	0	0	0	0	0	0	0	0	0	0	0	0	0	0	0	0	0	0	0	0	0
cluster_17071n	GVAGIGKT	4	0	0	0	0	0	0	0	0	0	0	0	0	0	0	0	0	0	0	0	0	0	1	0	0	0	0	0	0	8	0	0	0	3	0	0	81	13	0	0	0	0	0	5	1	0	0	0
cluster_17091n	GVAGIGKS	2	0	0	0	0	0	0	0	0	0	0	0	0	0	0	0	0	1	1	0	0	0	0	0	0	0	0	0	2	1	0	3	0	0	0	7	0	0	6	0	0	15	7	0	9	0	0	12
cluster_17119n	GVAGIGKS	2	8	6	0	11	0	0	0	13	0	60	0	1	36	0	29	0	0	0	0	0	0	20	11	0	61	43	0	3	0	7	2	5	1	0	0	113	0	4	6	0	9	4	0	6	8	1	0
cluster_1711n	GIAGIGKT	3	0	0	0	0	0	0	0	0	0	0	0	0	0	0	0	0	0	0	0	0	0	0	0	0	0	0	0	0	0	0	0	0	0	0	0	0	0	0	0	0	0	0	0	0	0	0	0
cluster_17204n	GIAGIGKT	3	0	0	0	0	0	0	0	0	0	0	0	0	0	4	0	0	3	2	0	0	15	0	0	0	0	0	0	0	0	0	0	0	0	0	0	0	0	0	0	0	0	0	0	0	0	0	0
cluster_17238n	GIAGIGKT	3	0	0	0	0	0	0	0	0	0	0	0	0	0	0	0	0	0	0	0	0	0	0	0	0	0	0	0	0	0	0	0	0	0	0	0	0	0	0	0	0	0	0	0	0	0	0	0
cluster_17244n	GIAGIGKT	3	0	0	0	0	0	0	0	0	0	0	0	0	0	0	0	0	0	0	0	0	0	0	0	0	0	0	0	0	0	0	0	0	0	0	0	0	0	0	0	0	0	0	0	0	0	0	0
cluster_17261n	GVAGIGKT	4	0	0	0	0	0	0	0	0	0	0	0	0	0	0	0	0	0	0	0	0	0	0	0	0	0	0	0	0	0	0	0	0	0	0	0	0	0	0	0	0	0	0	0	0	0	0	0
cluster_17303n	multiple	multiple	0	0	0	0	0	0	0	0	0	0	0	0	0	0	0	0	0	0	0	0	0	0	0	0	0	0	0	0	0	0	0	0	0	0	0	0	0	0	0	0	0	0	0	0	0	0	0
cluster_17318n	GVAGIGKS	2	0	0	5	0	0	0	0	0	0	0	0	15	0	0	0	0	0	0	0	0	0	0	0	0	0	0	0	1	4	0	0	1	9	0	0	0	0	1	1	0	0	0	0	6	0	0	3
cluster_17431n	GVAGIGKS	2	0	0	0	0	0	0	0	0	0	0	0	0	0	0	0	0	0	0	0	0	0	0	0	0	0	0	1	0	0	0	16	7	0	0	13	0	6	0	0	0	12	0	3	0	0	0	4
cluster_17652n	GIAGIGKT	3	0	0	0	0	0	0	0	0	0	0	0	0	0	12	0	11	1	14	0	0	0	1	0	0	0	0	0	0	0	0	0	0	3	1	7	42	0	5	0	0	1	0	0	0	0	0	0
cluster_17692n	multiple	multiple	0	0	0	0	0	0	0	0	0	0	0	0	0	0	0	0	0	0	0	0	0	0	0	0	0	0	0	0	0	0	0	0	0	0	0	0	0	0	0	0	0	0	0	0	0	0	0
cluster_17716n	GIAGVGKT	1	0	0	0	0	0	0	0	0	2	38	1	0	50	2	44	34	1	2	1	4	20	27	7	10	0	1	0	6	19	13	0	3	0	0	0	108	7	0	1	3	8	0	7	11	1	1	35
cluster_17771n	GVAGIGKS	2	0	0	0	0	0	0	0	0	0	0	0	0	0	0	0	0	0	0	0	0	0	0	0	0	0	0	0	0	0	0	0	0	0	0	0	0	0	0	0	0	0	0	0	0	0	0	0
cluster_17903n	GIAGVGKT	1	0	0	0	0	0	0	0	0	27	130	64	69	22	24	44	52	34	17	17	0	50	51	0	38	28	29	0	0	0	0	0	0	0	0	5	0	0	0	0	1	0	0	0	0	0	0	10
cluster_1791n	GIAGIGKT	3	0	0	0	0	0	0	0	0	0	0	0	0	0	0	0	0	0	0	0	0	0	0	0	0	0	0	0	0	0	0	0	0	0	0	0	0	0	0	0	0	0	0	0	0	0	0	0
cluster_18015n	GVAGIGKS	2	0	0	0	0	0	0	0	0	0	0	0	0	0	0	0	0	0	0	0	0	0	0	0	0	0	0	0	0	0	0	0	0	0	0	0	0	0	0	0	1	0	0	0	0	0	0	0
cluster_18116n	GVAGIGKS	2	0	0	0	0	0	0	0	0	0	0	0	0	0	0	0	0	0	0	0	0	0	0	0	0	0	0	0	0	0	0	2	3	0	0	0	0	0	0	0	0	0	2	0	0	0	0	0
cluster_18197n	GIAGIGKT	3	0	0	0	0	0	0	0	0	0	0	0	0	0	0	0	0	0	0	0	0	0	0	0	0	0	0	0	0	0	0	0	0	0	0	0	0	0	0	0	0	0	0	0	0	0	0	0
cluster_18240n	GIAGIGKT	3	0	0	0	0	0	0	0	0	0	0	0	0	0	0	0	0	0	0	0	0	0	0	0	0	0	0	0	0	0	0	0	0	0	0	0	0	0	0	0	0	0	0	0	0	0	0	0
cluster_18335n	GIAGIGKT	3	0	0	0	0	0	0	0	0	0	0	0	0	0	0	0	0	0	0	0	0	0	0	0	0	0	0	0	0	0	0	0	0	0	0	0	0	0	0	0	0	0	0	0	0	0	0	0
cluster_18368n	GVAGIGKS	2	0	0	0	0	0	0	0	0	0	1	1	0	0	0	4	0	0	0	0	0	0	0	0	0	0	0	1	0	0	0	0	2	1	0	0	0	0	0	0	0	0	0	0	0	0	0	0
cluster_18381n	GIAGIGKT	3	0	0	0	0	0	0	0	0	11	0	6	0	0	0	0	0	0	0	14	2	0	0	0	0	0	0	0	0	0	0	0	0	0	0	0	0	0	0	0	0	0	0	0	0	0	0	0
cluster_18424n	GIAGIGKT	3	0	0	0	0	0	0	0	0	0	0	0	0	0	0	0	0	0	0	0	0	0	0	0	0	0	0	0	0	0	0	0	0	0	0	0	0	0	0	0	0	0	0	0	0	0	0	0
cluster_18439n	GIAGIGKT	3	0	0	0	0	0	0	0	0	0	0	0	0	0	0	0	0	0	0	0	0	0	0	0	0	0	0	0	0	0	0	0	0	0	0	0	0	0	0	0	0	0	0	0	0	0	0	0
cluster_18490n	GIAGIGKT	3	0	0	0	0	0	0	0	0	0	0	0	0	0	0	0	0	0	0	0	0	0	0	0	0	0	0	0	0	0	0	0	0	0	0	0	0	0	0	0	0	0	0	0	0	0	0	0
cluster_18492n	GIAGIGKT	3	0	0	0	0	0	0	0	0	0	0	0	0	0	0	0	0	0	0	0	0	0	0	0	0	0	0	0	0	0	0	0	0	0	0	0	0	0	0	0	0	0	0	0	0	0	0	0
cluster_18498n	GIAGVGKT	1	0	0	0	0	0	0	0	0	0	0	0	0	0	0	0	0	0	0	0	0	0	0	0	0	0	0	0	0	0	0	0	0	0	0	0	0	0	0	0	0	0	0	0	0	0	0	0
cluster_1849n	GVAGIGKT	4	0	0	0	0	0	0	0	1	0	0	0	0	0	0	0	0	0	0	0	0	0	0	0	0	0	0	0	0	0	0	0	0	0	0	0	0	0	0	0	0	0	0	0	0	0	0	0
cluster_1855n	GIAGIGKT	3	4	1	0	0	1	0	2	2	0	0	0	0	0	0	0	0	0	0	0	0	0	0	0	0	0	0	0	0	0	0	0	0	0	0	0	0	0	0	0	0	0	0	0	0	0	0	0
cluster_18614n	GIAGIGKT	3	0	0	0	0	0	0	0	0	3	5	0	0	0	27	0	0	26	24	0	1	0	0	0	0	0	0	0	3	3	0	0	0	4	0	1	0	0	0	0	0	0	0	0	2	0	0	1
cluster_18676n	GVAGIGKT	4	0	0	0	0	0	0	0	0	0	0	0	0	0	0	0	0	0	0	0	0	0	0	0	0	0	0	0	0	10	0	0	0	0	4	4	47	0	0	0	0	0	0	1	0	3	5	2
cluster_18718n	GIAGIGKT	3	0	0	0	0	0	0	0	0	0	0	11	0	0	0	0	0	0	0	0	0	0	3	0	2	6	5	0	0	3	0	1	0	0	0	2	0	3	1	0	0	1	0	2	0	0	0	0
cluster_18726n	GIAGIGKT	3	0	0	0	0	0	0	0	0	0	0	0	0	0	0	0	0	0	0	0	0	0	0	0	0	0	0	0	0	0	0	0	0	0	0	0	0	0	0	0	0	0	0	0	0	0	0	0
cluster_18791n	multiple	multiple	0	0	0	0	0	0	0	0	0	0	0	0	0	0	0	0	0	0	0	0	0	0	0	0	0	0	0	0	0	0	0	0	0	0	0	0	0	0	0	0	0	0	0	0	0	0	0
cluster_18921n	GIAGIGKT	3	0	0	0	0	0	0	0	0	0	0	0	0	0	0	0	0	0	0	0	0	0	0	0	0	0	0	0	0	0	0	0	0	0	0	0	0	0	0	0	0	0	0	0	0	0	0	0
cluster_19029n	GVAGIGKT	4	0	0	0	0	0	0	0	0	0	0	0	0	0	0	0	0	0	0	0	0	0	0	0	0	0	0	0	0	0	0	0	0	0	0	0	0	0	0	0	0	0	0	0	0	0	0	0
cluster_19070n	GIAGIGKT	3	0	0	0	0	0	0	0	0	0	0	0	0	0	0	0	0	0	0	0	0	1	0	0	0	0	0	0	0	0	0	0	0	0	0	0	0	0	0	0	0	0	0	0	0	0	0	0
cluster_19158n	GIAGVGKT	1	0	0	0	0	0	0	0	0	0	0	34	1	0	0	0	1	0	20	0	1	0	0	0	0	0	0	0	0	1	0	0	3	8	0	0	0	0	2	0	1	0	1	0	0	0	0	0
cluster_19283n	GIAGIGKT	3	0	0	0	0	0	0	0	0	0	0	0	0	0	0	0	0	0	0	0	0	0	0	0	0	0	0	0	0	0	0	0	0	0	0	0	0	0	0	0	0	0	0	0	0	0	0	0
cluster_19288n	GVAGIGKT	4	0	0	0	0	0	0	0	0	0	0	0	0	0	0	0	0	0	0	0	0	0	0	0	0	0	0	0	0	0	0	0	0	0	0	0	0	0	0	0	0	0	0	0	0	0	0	0
cluster_19299n	GIAGIGKT	3	0	0	0	0	0	0	0	0	0	0	0	0	0	0	0	0	0	0	0	0	0	0	0	0	0	0	0	0	0	0	0	0	0	0	0	0	0	0	0	0	0	0	0	0	0	0	0
cluster_19392n	GVAGIGKT	4	0	0	0	0	0	0	10	0	0	0	0	0	0	0	0	0	0	0	0	0	0	0	0	0	0	0	0	0	0	0	0	0	0	0	0	72	0	0	0	0	0	0	0	0	0	0	16
cluster_19499n	GIAGIGKT	3	16	0	0	21	14	16	11	14	35	0	0	0	0	1	5	0	3	0	0	3	1	1	0	0	0	0	0	0	0	0	0	0	6	1	0	0	0	0	0	0	0	0	0	0	0	0	0
cluster_19568n	GVAGIGKS	2	0	0	0	0	0	0	0	0	0	0	0	0	0	0	0	0	0	0	0	0	0	0	0	0	0	0	0	0	0	0	0	0	0	0	0	0	0	0	0	0	0	0	0	0	0	0	0
cluster_19592n	GIAGIGKT	3	0	0	0	0	0	0	0	0	0	0	0	0	0	0	0	0	0	0	0	0	0	0	0	0	0	0	0	0	0	0	0	0	0	0	0	0	0	0	0	0	0	0	0	0	0	0	0
cluster_19600n	GVAGIGKS	2	0	0	9	0	0	0	0	0	24	2	18	0	18	0	0	4	0	0	0	0	0	4	13	0	0	0	0	0	0	0	13	0	0	0	0	70	0	2	0	0	1	0	1	0	0	2	0
cluster_19730n	GIAGIGKT	3	0	0	0	0	0	0	0	0	0	0	0	0	0	0	0	0	0	0	0	0	0	0	0	0	0	0	0	0	0	0	0	0	0	0	0	0	0	0	0	0	0	0	0	0	0	0	0
cluster_19884n	GVAGIGKS	2	0	0	0	0	0	0	0	0	0	0	0	0	0	0	0	0	0	0	0	0	0	0	0	0	0	0	0	0	0	0	0	0	0	0	0	0	0	0	0	0	0	0	0	0	0	0	0
cluster_20065n	multiple	multiple	0	0	0	0	0	0	0	0	0	0	0	0	0	0	0	0	0	0	0	0	0	0	0	0	0	0	0	0	0	0	0	0	0	0	0	0	0	0	0	0	0	0	0	0	0	0	0
cluster_20099n	multiple	multiple	0	0	0	0	0	0	0	0	0	0	0	0	0	0	0	0	0	0	0	0	0	0	0	0	0	0	0	0	0	0	0	0	0	0	0	0	0	0	0	0	0	0	0	0	0	0	0
cluster_20106n	GIAGVGKT	1	0	0	0	0	0	0	0	0	0	0	0	0	0	0	0	0	0	0	0	0	0	4	5	0	0	0	0	0	0	0	0	0	0	0	0	0	0	0	0	0	0	0	0	0	0	0	0
cluster_20144n	GIAGIGKT	3	0	0	0	0	0	0	0	0	0	0	0	0	0	0	0	0	0	0	0	0	0	0	0	0	0	0	0	0	0	0	0	0	0	0	0	0	0	0	0	0	0	0	0	0	0	0	0
cluster_2015n	GIAGIGKT	3	0	0	0	0	0	0	0	0	0	0	0	0	0	0	0	0	0	0	0	0	0	0	0	0	0	0	0	0	0	0	0	0	0	0	0	0	0	0	0	0	0	0	0	0	0	0	0
cluster_20222n	multiple	multiple	0	0	0	0	0	0	0	0	0	0	0	0	0	0	0	0	0	0	0	0	0	0	0	0	0	0	0	0	0	0	0	0	0	0	0	0	0	0	0	0	0	0	0	0	0	0	0
cluster_20253n	GVAGIGKS	2	0	0	0	0	0	0	0	0	0	0	0	0	0	0	0	0	0	0	0	0	0	0	0	0	0	0	0	0	0	0	0	0	0	0	0	0	0	0	0	0	0	0	0	0	0	0	0
cluster_20333n	GIAGIGKT	3	0	0	0	0	0	0	0	0	0	0	0	1	0	0	0	0	0	0	0	0	0	0	0	0	0	0	0	0	0	0	0	0	0	0	0	0	0	0	0	2	0	0	0	0	0	0	0
cluster_20393n	GVAGIGKT	4	0	0	0	0	0	0	0	0	0	0	0	0	0	0	0	0	0	0	0	0	0	0	0	0	0	0	0	0	0	0	0	0	0	0	0	0	0	0	0	0	0	0	0	0	0	0	0
cluster_20405n	GVAGIGKS	2	0	0	2	0	0	0	9	0	0	0	0	0	0	0	0	0	0	0	0	0	0	0	0	0	0	0	0	0	0	6	0	0	0	0	0	0	0	0	0	0	0	0	0	0	0	0	0
cluster_20433n	GVAGIGKS	2	0	0	0	0	0	0	0	0	16	0	0	0	12	0	0	0	5	0	4	0	0	5	0	7	0	0	0	0	1	1	0	0	0	0	0	0	0	1	0	0	0	1	0	0	0	0	0
cluster_20437n	multiple	multiple	0	0	0	0	0	0	0	0	0	0	0	0	0	0	0	0	0	0	0	0	0	0	0	0	0	0	0	0	0	0	0	0	0	0	0	0	0	0	0	0	0	0	0	0	0	0	0
cluster_2064n	GVAGIGKS	2	0	0	0	0	0	0	0	0	0	0	0	0	0	0	0	0	0	0	0	0	0	0	0	0	0	0	0	0	0	0	0	0	0	0	0	0	0	0	0	0	0	0	0	0	0	0	0
cluster_20676n	multiple	multiple	0	0	0	0	0	0	0	0	0	0	0	0	0	0	0	0	0	0	0	0	0	0	0	0	0	0	0	0	0	0	0	0	0	0	0	0	0	0	0	0	0	0	0	0	0	0	0
cluster_20681n	GIAGIGKT	3	0	0	0	0	0	0	0	0	0	0	0	0	0	0	0	0	0	0	0	0	0	0	0	0	0	0	0	0	0	0	0	0	0	0	0	0	0	0	0	0	0	0	0	0	0	0	0
cluster_20837n	GVAGIGKS	2	0	0	0	0	0	0	0	0	0	0	0	0	0	0	0	0	0	0	0	0	0	0	0	0	0	0	0	0	0	0	0	0	0	0	0	0	0	0	0	0	0	0	0	0	0	0	0
cluster_20860n	GVAGIGKT	4	0	0	0	0	0	0	0	0	0	0	0	0	0	0	0	0	0	0	0	0	0	0	0	0	0	0	0	0	0	0	0	0	0	0	0	0	0	0	0	0	0	0	0	0	0	0	0
cluster_20922n	GIAGIGKT	3	0	0	0	0	0	0	0	0	0	0	0	0	0	0	0	0	0	0	0	0	0	0	0	0	0	0	0	0	0	0	0	0	0	0	0	0	0	0	0	0	0	0	0	0	0	0	0
cluster_21045n	GIAGIGKT	3	0	0	0	0	0	0	0	0	0	10	0	15	0	43	0	0	15	29	0	2	2	4	1	0	3	1	0	0	0	0	0	0	0	0	0	0	2	0	0	0	0	0	0	0	0	0	0
cluster_21192n	GIAGIGKT	3	0	0	0	0	0	0	0	0	0	0	0	0	0	0	0	0	0	0	0	0	0	0	0	0	0	0	0	0	0	0	0	0	0	0	0	0	0	0	0	0	0	0	0	0	0	0	0
cluster_21278n	GIAGVGKT	1	0	0	0	0	0	0	0	0	0	38	0	1	0	0	0	62	4	0	5	2	1	1	22	0	1	0	0	0	0	0	0	1	0	0	1	0	0	0	8	0	0	1	7	0	0	0	25
cluster_21323n	GVAGIGKS	2	0	0	0	0	0	0	0	0	0	0	0	0	0	0	0	0	0	0	0	0	0	0	0	0	0	0	0	0	0	0	0	0	0	0	0	0	0	0	0	0	0	0	0	0	0	0	0
cluster_21365n	GIAGIGKT	3	0	0	0	0	0	0	0	0	0	0	0	10	0	10	0	0	2	14	0	2	0	2	0	0	1	0	0	1	0	8	11	7	0	5	1	0	2	1	0	0	0	4	0	8	0	0	7
cluster_21394n	GIAGIGKT	3	0	0	0	0	0	0	0	0	0	0	0	0	0	0	0	0	0	0	0	0	0	0	0	0	0	0	0	0	0	0	0	0	0	0	0	0	0	0	0	0	0	0	0	0	0	0	0
cluster_21400n	GVAGIGKS	2	0	0	0	0	0	0	0	0	0	0	0	0	0	0	0	0	0	0	0	0	0	0	0	0	0	0	0	0	0	0	0	0	0	0	0	0	0	0	0	0	0	0	0	0	0	0	0
cluster_2151n	GIAGIGKT	3	0	0	0	0	0	0	0	0	0	0	0	0	0	0	0	0	0	0	0	0	0	0	0	0	0	0	0	0	0	0	0	0	0	0	0	0	0	0	0	0	0	0	0	0	0	0	0
cluster_21529n	multiple	multiple	0	0	0	0	0	0	0	0	0	0	0	0	0	0	0	0	0	0	0	0	0	0	0	0	0	0	0	0	0	0	0	0	0	0	0	0	0	0	0	0	0	0	0	0	0	0	0
cluster_21656n	GIAGIGKT	3	0	0	0	0	0	0	0	0	0	0	0	0	0	8	7	1	11	0	0	0	0	0	0	0	0	0	0	0	0	0	0	0	0	0	0	0	0	0	0	0	0	0	0	0	0	0	0
cluster_21731n	GVAGIGKT	4	0	0	0	0	0	0	0	0	0	0	0	0	0	0	0	0	0	0	0	0	0	0	0	0	0	0	0	0	0	0	0	0	0	0	0	0	0	0	0	0	0	0	0	0	0	0	0
cluster_2173n	GVAGIGKS	2	2	7	2	6	0	0	0	4	0	0	0	0	0	0	0	3	3	0	0	0	0	0	0	0	0	0	0	2	0	0	0	0	0	0	0	1	0	0	0	0	0	0	0	1	0	0	0
cluster_21909n	GVAGIGKS	2	0	0	0	0	0	0	0	0	0	0	0	0	0	0	0	0	0	0	0	0	0	0	0	0	0	0	0	0	0	0	0	0	0	0	0	0	0	0	0	0	0	0	0	0	0	0	0
cluster_21910n	GIAGIGKT	3	0	0	0	0	0	0	0	0	0	0	0	0	0	5	0	0	0	0	0	0	0	8	0	0	0	0	0	0	0	0	0	0	0	0	0	0	0	0	0	0	0	0	0	0	0	0	11
cluster_22064n	GIAGIGKT	3	0	0	0	0	0	0	0	0	0	0	0	0	0	0	0	0	0	0	0	0	0	0	0	0	0	0	0	0	0	0	0	0	0	0	0	0	0	0	0	0	0	0	0	0	0	0	0
cluster_22126n	multiple	multiple	0	0	0	0	0	0	0	0	0	0	0	0	0	0	0	0	0	0	0	0	0	0	0	0	0	0	0	0	0	0	0	0	0	0	0	0	0	0	0	0	0	0	0	0	0	0	0
cluster_22148n	multiple	multiple	0	0	0	0	0	0	0	0	0	0	0	0	0	0	0	0	0	0	0	0	0	0	0	0	0	0	0	0	0	0	0	0	0	0	0	0	0	0	0	0	0	0	0	0	0	0	0
cluster_22177n	GVAGIGKT	4	0	0	0	0	0	0	0	0	0	0	0	0	0	0	0	0	0	8	7	0	0	0	0	0	9	14	0	0	0	0	0	0	0	0	0	0	0	0	1	0	0	10	10	0	0	0	1
cluster_22212n	GIAGIGKT	3	0	0	0	0	0	0	0	0	1	1	2	2	2	2	2	5	2	1	1	0	2	0	0	1	0	0	0	5	9	0	0	2	8	2	6	81	0	1	6	2	0	4	1	10	0	0	5
cluster_22277n	GVAGIGKT	4	0	0	0	0	0	0	0	0	0	0	0	0	0	0	0	0	0	0	0	0	0	0	0	0	0	0	0	0	0	0	0	0	0	0	0	0	0	0	0	0	0	0	0	0	0	0	0
cluster_22334n	GIAGIGKT	3	0	0	0	0	0	0	0	0	0	0	0	0	0	0	0	0	0	0	0	0	0	0	0	0	0	0	0	0	0	0	0	0	0	0	0	0	0	0	0	0	0	0	0	0	0	0	0
cluster_22473n	multiple	multiple	0	0	0	0	0	0	0	0	0	0	0	0	0	0	0	0	0	0	0	0	0	0	0	0	0	0	0	0	0	0	0	0	0	0	0	0	0	0	0	0	0	0	0	0	0	0	0
cluster_22565n	GVAGIGKT	4	7	2	2	7	4	10	5	3	0	0	0	0	10	0	0	21	0	0	20	0	0	4	6	0	44	32	0	0	0	0	0	0	0	0	0	0	0	0	0	0	0	0	0	2	2	0	0
cluster_22708n	GVAGIGKS	2	0	0	0	0	0	0	0	0	0	0	0	0	0	0	0	0	0	0	0	0	0	0	0	0	0	0	0	0	0	0	0	0	0	0	0	0	0	0	0	0	0	0	0	0	0	0	0
cluster_2272n	GIAGIGKT	3	0	0	0	0	0	0	0	0	0	0	0	0	0	0	0	0	0	0	0	0	0	0	0	0	0	0	0	0	0	0	0	0	0	0	0	0	0	0	0	0	0	0	0	0	0	0	0
cluster_22800n	GVAGIGKS	2	0	0	0	0	0	0	0	0	0	0	0	0	0	0	0	0	0	0	0	0	0	0	0	0	0	0	0	0	0	0	0	1	0	1	6	6	0	0	0	0	0	1	0	0	0	0	0
cluster_22807n	multiple	multiple	0	0	0	0	0	0	0	0	0	0	0	0	0	0	0	0	0	0	0	0	0	0	0	0	0	0	0	0	0	0	0	0	0	0	0	0	0	0	0	0	0	0	0	0	0	0	0
cluster_22814n	GIAGIGKT	3	0	0	0	0	0	0	0	0	0	0	0	0	0	0	0	0	0	0	0	0	0	0	0	0	0	0	0	0	0	0	0	0	0	0	0	0	0	0	0	0	0	0	0	0	0	0	0
cluster_2287n	GVAGIGKS	2	54	21	18	38	61	51	41	45	0	0	38	19	24	17	1	0	4	13	39	2	0	18	1	8	0	0	0	0	0	0	0	16	0	0	0	0	4	2	3	0	0	4	0	1	2	1	4
cluster_22911n	GVAGIGKS	2	0	0	0	0	0	0	0	0	0	0	0	0	0	0	0	0	0	0	0	0	0	0	0	0	0	0	0	0	0	0	0	0	0	0	0	0	0	0	0	0	0	0	0	0	0	0	0
cluster_23031n	multiple	multiple	0	0	0	0	0	0	0	0	0	0	0	0	0	0	0	0	0	0	0	0	0	0	0	0	0	0	0	0	0	0	0	0	0	0	0	0	0	0	0	0	0	0	0	0	0	0	0
cluster_23044n	GVAGIGKS	2	0	0	0	0	0	0	0	0	0	0	0	0	0	0	0	0	0	0	0	0	0	0	0	0	0	0	0	0	0	0	0	0	0	0	0	4	0	0	0	0	0	0	0	0	0	0	0
cluster_23079n	GVAGIGKT	4	0	0	0	0	0	0	0	0	0	0	0	0	0	0	0	0	0	0	0	0	0	0	0	0	0	0	0	0	0	0	0	0	0	0	0	0	0	0	0	0	0	0	0	0	0	0	0
cluster_23097n	GIAGVGKT	1	0	2	2	8	0	0	0	0	1	1	2	0	1	0	1	0	1	0	1	0	0	2	1	2	1	2	0	0	0	0	1	0	0	4	0	0	0	0	1	0	4	1	0	7	3	0	0
cluster_23118n	GVAGIGKS	2	0	0	0	0	0	0	0	0	0	0	0	0	0	0	0	0	0	0	0	0	0	0	0	0	0	0	0	0	0	0	0	0	0	0	0	0	0	0	0	0	0	0	0	0	0	0	0
cluster_23153n	GVAGIGKS	2	0	0	0	0	0	0	0	0	0	0	0	0	0	0	0	0	0	0	0	0	0	0	0	0	0	0	0	0	0	0	0	0	0	0	0	0	0	0	0	0	0	0	0	0	0	0	0
cluster_23155n	GVAGIGKS	2	0	0	0	0	0	0	0	0	0	0	0	0	0	0	0	0	0	0	0	0	0	0	0	0	0	0	0	0	0	0	0	0	0	0	0	0	0	0	0	0	0	0	0	0	0	0	0
cluster_23166n	GIAGIGKT	3	0	0	0	0	0	0	0	0	0	0	0	0	0	0	0	0	0	0	0	0	0	0	0	0	0	0	0	0	0	0	0	0	0	0	0	0	0	0	0	0	0	0	0	0	0	0	0
cluster_23194n	GIAGIGKT	3	0	0	0	0	0	0	0	0	0	0	0	0	0	0	0	0	30	0	0	0	0	0	0	0	0	0	0	0	13	0	0	0	0	0	0	0	0	0	0	0	0	0	0	0	0	0	0
cluster_23270n	GVAGIGKS	2	0	0	0	0	0	0	0	0	0	1	0	13	0	0	0	0	0	0	0	0	0	0	0	0	0	0	0	4	5	0	2	16	0	0	2	0	5	12	0	0	0	0	0	0	3	3	2
cluster_23332n	GIAGIGKT	3	5	3	1	3	5	2	5	2	0	0	0	0	0	0	0	0	0	0	0	0	0	0	0	0	0	0	0	1	2	2	0	0	0	1	0	9	1	0	0	0	0	0	1	0	0	0	0
cluster_23354n	GIAGIGKT	3	0	0	0	0	0	0	0	0	0	0	0	0	0	0	0	0	0	0	0	0	0	0	0	0	0	0	0	0	0	0	0	0	0	0	0	0	0	0	0	0	0	0	0	0	0	0	0
cluster_23457n	GIAGIGKT	3	0	0	0	0	0	0	0	0	0	0	0	0	0	0	0	0	0	0	0	0	0	0	0	0	0	0	0	0	0	0	0	0	0	0	0	0	0	0	0	0	0	0	0	0	0	0	0
cluster_23535n	multiple	multiple	0	0	0	0	0	0	0	0	0	0	0	0	0	0	0	0	0	0	0	0	0	0	0	0	0	0	0	0	0	0	0	0	0	0	0	0	0	0	0	0	0	0	0	0	0	0	0
cluster_23572n	GVAGIGKT	4	0	0	0	0	0	0	0	0	0	0	0	0	0	0	0	0	0	0	0	0	0	0	0	0	0	0	0	0	0	0	0	0	0	0	0	0	0	0	0	0	0	0	0	0	0	0	0
cluster_23583n	GIAGIGKT	3	0	0	0	0	0	0	0	0	15	89	0	0	0	1	25	0	0	0	0	1	13	23	0	0	0	0	0	0	0	8	0	9	5	0	4	0	0	0	0	2	0	0	0	11	0	0	0
cluster_23639n	multiple	multiple	0	0	0	0	0	0	0	0	0	0	0	0	0	0	0	0	0	0	0	0	0	0	0	0	0	0	0	0	0	0	0	0	0	0	0	0	0	0	0	0	0	0	0	0	0	0	0
cluster_23827n	GVAGIGKS	2	0	0	0	0	0	0	0	0	0	0	0	0	0	0	0	0	0	0	0	0	0	0	0	0	0	0	0	0	0	0	0	0	0	0	0	0	0	0	0	0	0	0	0	0	0	0	0
cluster_2384n	GVAGIGKT	4	0	0	0	0	0	0	0	0	0	0	0	0	0	0	0	0	0	0	0	0	0	0	0	0	0	0	0	0	0	0	0	0	0	0	0	0	0	0	0	0	0	0	0	0	0	0	0
cluster_23998n	GVAGIGKT	4	0	0	0	0	0	0	0	0	0	0	0	0	0	0	0	0	0	0	0	0	0	0	0	0	0	0	0	0	0	0	0	0	0	0	0	0	0	0	0	0	0	0	0	0	0	0	0
cluster_23999n	multiple	multiple	0	0	0	0	0	0	0	0	0	0	0	0	0	0	0	0	0	0	0	0	0	0	0	0	0	0	0	0	0	0	0	0	0	0	0	0	0	0	0	0	0	0	0	0	0	0	0
cluster_24146n	GVAGIGKS	2	0	0	0	0	0	0	0	0	0	0	0	0	0	0	0	0	0	0	0	0	0	0	0	0	0	0	0	0	0	0	0	0	0	0	0	0	0	0	0	0	0	0	0	0	0	0	0
cluster_24197n	GVAGIGKS	2	0	0	0	0	0	0	0	0	0	0	0	0	0	0	0	0	0	0	0	0	0	0	0	0	0	0	0	0	0	0	0	0	0	0	0	0	0	0	0	0	0	0	0	0	0	0	0
cluster_2430n	GIAGIGKT	3	0	0	0	0	0	0	0	0	0	0	0	1	0	3	2	1	0	0	1	0	1	2	0	0	0	0	0	0	0	0	0	0	0	0	0	0	0	0	0	0	0	0	0	0	0	0	0
cluster_24312n	GIAGIGKT	3	0	0	0	0	0	0	0	0	0	0	0	0	0	0	0	0	0	0	0	0	0	0	0	0	0	0	0	0	0	0	0	0	0	0	0	0	0	0	0	0	0	0	0	0	0	0	0
cluster_24371n	GIAGVGKT	1	0	0	0	0	0	0	0	0	52	44	0	50	1	29	63	52	0	0	44	0	47	54	14	0	5	10	0	4	9	0	0	0	0	0	0	0	0	6	9	0	0	0	1	0	0	0	3
cluster_2445n	GIAGIGKT	3	6	6	0	6	19	23	8	4	0	0	0	0	0	0	0	0	0	0	0	0	0	0	0	3	0	0	0	0	0	0	0	0	0	0	0	0	0	0	0	1	0	0	0	0	0	0	1
cluster_24478n	multiple	multiple	0	0	0	0	0	0	0	0	0	0	0	0	0	0	0	0	0	0	0	0	0	0	0	0	0	0	0	0	0	0	0	0	0	0	0	0	0	0	0	0	0	0	0	0	0	0	0
cluster_24528n	multiple	multiple	0	0	0	0	0	0	0	0	0	0	0	0	0	0	0	0	0	0	0	0	0	0	0	0	0	0	0	0	0	0	0	0	0	0	0	0	0	0	0	0	0	0	0	0	0	0	0
cluster_24547n	GIAGVGKT	1	0	0	0	0	0	0	0	0	0	0	0	0	0	0	0	0	0	0	0	0	0	0	0	0	0	0	0	0	0	0	0	0	0	0	0	0	0	0	0	0	0	0	0	0	0	0	0
cluster_24588n	GIAGVGKT	1	0	0	0	0	0	0	0	0	0	0	0	12	1	3	0	0	0	0	0	0	0	6	0	0	15	21	0	0	0	0	0	0	0	0	0	0	0	0	0	0	0	0	1	0	0	0	4
cluster_24710n	GIAGIGKT	3	0	0	0	0	0	0	0	0	0	0	0	0	0	0	0	0	0	0	0	0	0	0	0	0	0	0	0	0	0	0	0	0	0	0	0	0	0	0	0	0	0	0	0	0	0	0	0
cluster_24760n	GIAGIGKT	3	0	0	0	0	0	0	0	0	0	0	0	0	0	0	0	0	0	0	0	0	0	0	0	0	0	0	0	0	0	0	0	0	0	0	0	0	0	0	0	0	0	0	0	0	0	0	0
cluster_24770n	multiple	multiple	0	0	0	0	0	0	0	0	0	0	0	0	0	0	0	0	0	0	0	0	0	0	0	0	0	0	0	0	0	0	0	0	0	0	0	0	0	0	0	0	0	0	0	0	0	0	0
cluster_24818n	GIAGIGKT	3	0	0	0	0	0	0	0	0	0	0	0	0	0	0	0	0	0	0	0	0	0	0	0	0	0	0	0	0	0	0	1	0	0	4	0	0	0	0	0	0	13	0	0	0	0	0	1
cluster_24883n	GVAGIGKS	2	0	0	0	0	0	0	0	0	0	0	0	0	0	0	19	0	0	0	0	0	0	0	0	0	0	0	0	0	0	0	0	0	2	1	0	0	0	4	0	0	0	0	0	0	0	0	0
cluster_24922n	GVAGIGKS	2	0	0	0	0	0	0	0	0	1	0	0	0	0	4	0	3	1	0	0	0	0	3	0	0	0	2	0	0	0	0	0	0	0	0	1	0	0	0	0	0	0	0	0	0	0	0	10
cluster_24963n	GVAGIGKS	2	0	0	0	0	0	0	0	0	0	0	0	0	0	0	0	0	0	0	0	0	0	0	0	0	0	0	0	0	0	0	0	0	0	0	0	0	0	0	0	0	0	0	0	0	0	0	0
cluster_25009n	GVAGIGKS	2	0	0	0	0	0	0	0	0	0	45	17	44	0	44	1	1	19	10	22	0	12	13	0	43	0	0	0	0	0	0	0	7	2	0	8	68	4	3	3	2	10	4	4	3	0	0	5
cluster_2503n	GIAGIGKT	3	0	0	0	0	0	0	0	0	0	0	0	0	0	0	0	0	0	0	0	0	0	0	0	0	0	0	0	0	0	0	0	0	0	0	0	0	0	0	0	0	0	0	0	0	0	0	0
cluster_25113n	GIAGVGKT	1	0	0	0	0	0	0	0	0	0	0	0	0	0	0	0	0	0	0	0	0	0	0	0	0	0	0	0	0	0	0	0	0	0	0	0	0	0	0	0	0	0	0	0	0	0	0	0
cluster_25120n	GVAGIGKT	4	5	4	0	0	18	9	7	9	36	38	21	27	25	25	29	26	3	17	28	0	10	22	6	22	17	28	0	0	0	2	0	0	0	0	1	31	0	1	0	1	0	4	0	0	1	0	24
cluster_25253nn	GIAGIGKT	3	0	0	0	0	0	0	0	2	0	0	0	0	0	0	0	0	0	0	0	0	0	0	0	0	0	0	0	0	0	0	0	0	0	0	0	0	0	0	0	0	0	0	0	0	0	0	0
cluster_25302n	multiple	multiple	0	0	0	0	0	0	0	0	0	0	0	0	0	0	0	0	0	0	0	0	0	0	0	0	0	0	0	0	0	0	0	0	0	0	0	0	0	0	0	0	0	0	0	0	0	0	0
cluster_25340n	GVAGIGKS	2	0	0	0	0	0	0	0	0	0	0	0	0	0	0	0	0	0	0	0	0	0	0	0	0	0	0	0	0	0	0	0	0	0	0	0	79	0	0	3	0	0	0	0	0	0	0	0
cluster_25452n	GVAGIGKT	4	0	0	0	0	0	0	0	0	0	0	0	0	0	0	0	0	0	0	0	0	0	0	0	0	0	0	0	0	0	0	0	0	0	0	0	0	0	0	0	0	0	0	0	0	0	0	0
cluster_25460n	GIAGIGKT	3	0	0	0	0	0	0	0	0	0	0	0	0	0	0	0	0	0	0	0	0	0	0	0	0	0	0	0	0	0	0	0	0	0	0	0	0	0	0	0	0	0	0	0	0	0	0	0
cluster_25513n	GVAGIGKS	2	0	0	0	0	0	0	0	0	0	0	0	0	0	0	0	0	0	0	0	0	0	0	0	0	0	0	0	0	0	0	0	0	0	0	0	0	0	0	0	0	0	0	0	0	0	0	0
cluster_25517n	GIAGIGKT	3	8	7	9	8	22	10	15	19	18	17	17	23	8	22	15	9	2	13	8	0	11	19	5	8	17	13	1	6	2	2	2	3	5	0	8	68	6	4	3	4	7	5	2	12	4	1	17
cluster_2562n	GIAGIGKT	3	0	0	0	0	0	0	0	0	0	0	0	0	0	0	0	0	0	0	0	0	0	0	0	0	0	0	0	0	0	0	0	0	0	0	0	0	0	0	0	0	0	0	0	0	0	0	0
cluster_25655n	multiple	multiple	0	0	0	0	0	0	0	0	0	0	0	0	0	0	0	0	0	0	0	0	0	0	0	0	0	0	0	0	0	0	0	0	0	0	0	0	0	0	0	0	0	0	0	0	0	0	0
cluster_25751n	multiple	multiple	0	0	0	0	0	0	0	0	0	0	0	0	0	0	0	0	0	0	0	0	0	0	0	0	0	0	0	0	0	0	0	0	0	0	0	0	0	0	0	0	0	0	0	0	0	0	0
cluster_25831n	GIAGIGKT	3	5	1	2	2	0	3	0	14	0	0	0	0	0	0	0	0	0	0	0	0	0	0	0	1	0	0	0	0	0	0	0	6	1	1	1	25	0	0	3	1	1	0	0	0	1	1	1
cluster_25881n	GVAGIGKS	2	0	0	0	0	0	0	0	0	0	0	0	0	0	0	0	0	0	0	0	0	0	0	0	0	10	29	0	0	8	10	0	0	0	0	0	0	0	0	1	7	0	0	0	0	3	0	4
cluster_25915n	GVAGIGKS	2	0	0	0	0	0	0	0	0	0	0	0	0	0	0	0	0	0	0	0	0	0	0	0	0	0	0	0	0	0	0	0	0	0	0	0	0	0	0	0	0	0	0	0	0	0	0	0
cluster_25940n	GIAGIGKT	3	0	0	0	0	0	0	0	0	0	0	1	0	0	0	1	0	0	2	0	0	1	2	0	0	0	1	0	0	0	0	0	0	0	0	0	5	0	0	0	2	0	0	0	0	1	0	0
cluster_25957n	GVAGIGKT	4	4	0	2	2	10	5	3	3	0	0	1	0	1	0	0	0	0	0	0	0	0	0	0	0	2	5	1	1	0	2	0	0	0	1	0	0	0	1	0	6	0	0	0	2	0	0	1
cluster_26113n	GVAGIGKS	2	0	0	0	0	0	0	0	0	0	0	0	0	0	0	0	0	0	0	0	0	0	0	0	0	0	0	0	0	0	0	0	0	0	0	0	0	0	0	0	0	0	0	0	0	0	0	0
cluster_26155n	GIAGVGKT	1	0	0	0	0	0	0	0	0	0	0	0	0	0	0	0	0	0	0	0	0	0	0	0	0	0	0	0	0	0	0	0	0	0	0	0	0	0	0	0	0	0	0	0	0	0	0	0
cluster_26221n	GVAGIGKS	2	0	0	0	0	0	0	0	0	0	0	0	0	0	0	0	0	0	0	0	0	0	0	0	0	0	0	0	0	0	0	0	0	0	0	0	0	0	0	0	0	0	0	0	0	0	0	0
cluster_26319n	GVAGIGKS	2	0	0	0	0	0	0	0	0	0	1	0	3	1	4	0	1	0	2	0	0	0	3	2	0	0	0	0	0	0	0	0	0	0	0	0	0	0	0	0	0	1	0	0	0	0	1	18
cluster_26481n	GIAGVGKT	1	0	0	0	0	0	0	0	0	0	0	0	0	0	0	0	0	0	0	0	0	0	0	0	0	0	0	0	0	0	0	0	0	0	0	0	0	0	0	0	0	0	0	0	0	0	0	0
cluster_26486n	multiple	multiple	0	0	0	0	0	0	0	0	0	0	0	0	0	0	0	0	0	0	0	0	0	0	0	0	0	0	0	0	0	0	0	0	0	0	0	0	0	0	0	0	0	0	0	0	0	0	0
cluster_26896n	GIAGVGKT	1	0	0	0	0	0	0	0	0	0	0	0	0	0	0	0	0	0	0	0	0	0	0	0	0	0	0	0	0	0	0	0	0	0	0	0	0	0	0	0	0	0	0	0	0	0	0	0
cluster_26976n	multiple	multiple	0	0	0	0	0	0	0	0	0	0	0	0	0	0	0	0	0	0	0	0	0	0	0	0	0	0	0	0	0	0	0	0	0	0	0	0	0	0	0	0	0	0	0	0	0	0	0
cluster_27008n	GVAGIGKT	4	0	0	0	0	0	0	0	0	0	0	0	0	0	0	0	0	0	0	0	0	0	0	0	0	0	0	0	0	0	0	0	0	0	0	0	0	0	0	0	0	0	0	0	0	0	0	14
cluster_27016n	GVAGIGKS	2	0	0	0	0	0	0	0	0	0	0	0	0	0	0	0	0	0	0	0	0	0	0	0	0	0	0	0	0	0	0	0	0	0	0	0	0	0	0	0	0	0	0	0	0	0	0	0
cluster_27052n	GIAGIGKT	3	0	9	5	2	0	0	0	1	0	0	0	0	1	0	0	1	0	0	0	0	0	1	0	0	0	0	0	0	3	1	0	4	0	0	0	0	0	5	0	0	0	0	0	1	0	0	11
cluster_27053n	GIAGIGKT	3	0	0	0	0	0	0	0	0	0	0	0	0	0	0	0	0	0	0	0	0	0	0	0	0	0	0	0	0	0	0	0	0	0	0	0	0	0	0	0	0	0	0	0	0	0	0	0
cluster_27097n	GVAGIGKS	2	0	0	0	0	0	0	0	0	0	0	1	0	0	0	0	0	1	0	0	0	0	0	0	0	0	0	0	0	0	0	0	0	0	0	0	0	0	0	0	0	0	0	0	0	0	0	0
cluster_27110n	GIAGVGKT	1	0	0	0	0	0	0	0	0	0	0	0	0	0	0	0	0	0	0	0	0	0	0	0	0	0	0	0	0	0	0	0	0	0	0	0	0	0	0	0	0	0	0	0	0	0	0	0
cluster_27178n	GVAGIGKS	2	0	0	0	0	0	0	0	0	0	0	0	0	0	0	0	0	0	0	0	0	0	0	0	0	0	0	0	0	0	0	0	0	0	0	0	0	0	0	0	0	0	0	0	0	0	0	0
cluster_27193n	GIAGIGKT	3	0	0	0	0	0	0	0	0	0	0	0	0	0	0	0	0	0	0	0	0	0	0	0	0	0	0	0	0	0	0	0	0	0	0	0	0	0	0	0	0	0	0	0	0	0	0	0
cluster_27296n	multiple	multiple	0	0	0	0	0	0	0	0	0	0	0	0	0	0	0	0	0	0	0	0	0	0	0	0	0	0	0	0	0	0	0	0	0	0	0	0	0	0	0	0	0	0	0	0	0	0	0
cluster_27398n	GVAGIGKS	2	0	0	0	0	0	0	0	0	0	0	0	0	2	0	0	0	0	0	0	0	0	0	0	0	0	0	0	0	0	0	0	3	0	0	7	0	0	0	0	0	0	0	0	0	0	0	0
cluster_2750n	GIAGIGKT	3	0	0	0	0	0	0	0	0	0	0	0	0	0	0	0	0	0	0	0	0	0	0	0	0	0	0	0	0	0	0	0	0	0	0	0	0	0	0	0	0	0	0	0	0	0	0	0
cluster_27558n	GIAGIGKT	3	0	0	0	0	0	0	0	0	0	15	0	0	2	0	0	5	9	0	0	0	5	0	0	0	0	0	0	0	0	0	0	0	0	0	0	0	0	0	0	0	0	0	0	0	0	0	0
cluster_27711n	GIAGIGKT	3	0	0	0	0	0	0	0	0	0	0	0	0	0	0	0	0	0	0	0	0	0	0	0	0	0	0	0	0	0	0	0	0	0	0	0	0	0	0	0	0	0	0	0	0	0	0	0
cluster_2776n	GIAGIGKT	3	0	0	0	0	0	0	0	0	0	0	0	0	0	0	0	0	0	0	0	0	0	0	0	0	0	0	0	0	0	0	0	0	0	0	0	0	0	0	0	0	0	0	0	0	0	0	0
cluster_27817n	GVAGIGKS	2	0	0	0	0	0	0	0	0	0	0	0	0	0	0	0	0	0	0	0	0	0	0	0	0	0	0	0	0	0	0	0	0	0	0	0	0	0	0	0	0	0	0	0	0	0	0	0
cluster_27880n	GIAGVGKT	1	0	0	0	0	0	0	0	0	0	0	0	0	0	0	0	0	0	0	0	0	0	0	0	0	0	0	0	0	0	0	0	0	0	0	0	0	0	0	0	0	0	0	0	0	0	0	0
cluster_28124n	GVAGIGKS	2	0	0	0	0	0	0	0	0	0	0	0	0	0	0	0	0	0	0	0	0	0	0	0	0	0	0	0	0	0	0	0	0	0	0	0	0	0	0	0	0	0	0	0	0	0	0	0
cluster_28197n	multiple	multiple	0	0	0	0	0	0	0	0	0	0	0	0	0	0	0	0	0	0	0	0	0	0	0	0	0	0	0	0	0	0	0	0	0	0	0	0	0	0	0	0	0	0	0	0	0	0	0
cluster_28396n	GVAGIGKS	2	0	0	0	0	0	0	0	0	0	0	0	0	0	0	0	0	0	0	0	0	0	0	0	0	0	0	0	0	0	0	0	0	0	0	0	0	0	0	0	0	0	0	0	0	0	0	0
cluster_28418n	GVAGIGKS	2	0	0	0	0	0	0	0	0	0	0	1	0	0	0	0	0	0	0	0	0	0	0	0	0	0	0	0	0	0	0	0	0	0	0	0	0	0	0	0	0	0	0	0	0	0	0	0
cluster_2844n	GVAGIGKT	4	0	0	0	0	0	0	0	1	0	0	0	0	0	0	0	0	0	0	0	0	0	0	0	0	0	0	0	0	0	0	0	0	0	0	0	0	0	0	0	0	0	0	0	0	0	0	0
cluster_2878n	GIAGIGKT	3	5	3	2	7	5	3	2	8	0	0	0	0	0	0	0	0	0	0	0	0	0	0	0	1	0	0	0	0	0	0	0	0	0	0	0	0	0	0	0	0	0	0	0	0	0	0	1
cluster_28838n	GVAGIGKS	2	0	0	0	0	0	0	0	0	0	0	0	0	0	0	0	0	0	0	0	0	0	0	0	0	0	0	0	0	0	0	0	0	0	0	0	0	0	0	0	0	0	0	0	1	0	0	0
cluster_28864n	GIAGVGKT	1	0	0	0	0	0	0	0	0	0	0	0	0	0	0	0	0	0	0	0	0	0	0	0	0	0	0	0	0	0	0	0	0	0	0	0	0	0	0	0	0	0	0	0	0	0	0	13
cluster_2890n	GIAGIGKT	3	0	0	0	0	0	0	0	0	0	0	0	0	0	0	0	0	0	0	0	0	0	0	0	0	0	0	0	0	0	0	0	0	0	0	0	0	0	0	0	0	0	0	0	0	0	0	0
cluster_28910n	GVAGIGKS	2	0	0	0	0	0	0	0	0	0	0	0	0	0	0	0	0	0	0	0	0	0	0	0	0	0	0	0	0	0	0	0	0	0	0	0	0	0	0	0	0	0	0	0	0	0	0	0
cluster_28912n	GIAGIGKT	3	0	0	0	0	0	0	0	0	0	0	0	0	0	0	0	0	0	0	0	0	0	0	0	0	0	0	0	0	0	0	0	0	0	0	0	0	0	0	0	0	0	0	0	0	0	0	0
cluster_28970n	GVAGIGKT	4	0	0	0	0	0	0	0	0	0	0	0	0	0	0	0	0	0	0	0	0	0	0	0	0	0	0	0	0	0	0	0	0	0	0	0	0	0	0	0	0	0	0	0	0	0	0	0
cluster_28973n	GVAGIGKS	2	0	0	0	0	0	0	0	0	0	105	0	1	0	1	0	0	0	0	23	0	0	0	0	0	0	0	0	0	0	0	0	0	0	0	0	0	0	0	0	0	0	0	0	0	0	0	0
cluster_28993n	GIAGIGKT	3	0	0	0	0	0	0	0	0	0	0	0	0	0	0	0	0	0	0	0	0	0	0	0	0	0	0	0	0	0	0	0	0	0	0	0	0	0	0	0	0	0	0	0	0	0	0	0
cluster_29079n	multiple	multiple	0	0	0	0	0	0	0	0	0	0	0	0	0	0	0	0	0	0	0	0	0	0	0	0	0	0	0	0	0	0	0	0	0	0	0	0	0	0	0	0	0	0	0	0	0	0	0
cluster_29108n	GVAGIGKS	2	0	0	0	0	0	0	0	0	0	0	0	0	0	0	0	0	0	0	0	0	0	0	0	0	0	0	0	0	0	0	0	0	0	0	0	0	0	0	0	0	0	0	0	0	0	0	0
cluster_29151n	GIAGIGKT	3	0	0	0	0	0	0	0	0	0	0	0	0	0	0	0	0	0	0	0	0	0	0	0	0	0	0	0	0	0	0	0	0	0	0	0	0	0	0	0	0	0	0	0	0	0	0	0
cluster_29154n	GVAGIGKS	2	0	0	0	0	0	0	0	0	0	0	0	0	0	0	0	0	0	0	0	0	0	0	0	0	0	0	0	0	0	0	0	0	0	0	0	0	0	0	0	0	0	0	0	0	0	0	0
cluster_29195n	GVAGIGKS	2	0	0	0	0	0	0	0	0	0	0	2	1	0	0	1	0	0	0	0	1	0	0	0	0	0	0	0	0	0	0	0	0	0	0	0	0	0	0	0	0	0	0	0	0	0	0	0
cluster_29208n	GIAGIGKT	3	0	0	0	0	0	0	0	0	0	0	0	0	0	0	0	0	0	0	0	0	0	0	0	0	0	0	0	0	0	0	0	0	0	0	0	0	0	0	0	0	0	0	0	0	0	0	0
cluster_29278n	GIAGIGKT	3	0	0	1	0	0	0	0	0	3	7	0	0	0	0	8	0	0	0	0	0	8	0	0	5	0	0	0	0	0	0	0	0	0	0	0	0	0	0	0	0	0	0	0	1	0	0	0
cluster_29296n	GIAGVGKT	1	0	0	0	0	0	0	0	0	0	0	0	0	0	0	0	0	0	0	0	0	0	0	0	0	0	0	0	0	0	0	0	0	0	0	0	0	0	0	0	0	0	0	0	0	0	0	0
cluster_29341n	GIAGIGKT	3	0	0	0	0	0	0	0	0	0	0	0	0	0	0	0	0	0	0	0	0	0	0	0	0	0	0	0	3	0	5	0	2	0	0	3	50	0	0	0	0	8	0	0	1	0	0	0
cluster_29354n	GVAGIGKS	2	0	0	0	0	0	0	0	0	0	0	0	0	0	0	0	0	0	0	0	0	0	0	0	0	0	0	0	4	24	7	0	0	1	0	2	0	0	0	0	0	0	0	0	0	0	0	0
cluster_29366n	GVAGIGKT	4	0	0	0	0	0	0	0	0	0	5	13	0	0	0	0	0	4	0	0	0	0	4	0	0	0	0	0	1	0	0	0	0	0	2	0	0	0	0	1	0	0	0	1	0	1	0	4
cluster_29416n	multiple	multiple	0	0	0	0	0	0	0	0	0	0	0	0	0	0	0	0	0	0	0	0	0	0	0	0	0	0	0	0	0	0	0	0	0	0	0	0	0	0	0	0	0	0	0	0	0	0	0
cluster_2944n	GIAGIGKT	3	25	23	7	0	27	0	27	29	0	0	0	2	0	0	0	0	0	0	0	0	0	1	0	0	0	1	0	0	0	0	1	0	0	0	0	0	0	0	0	0	0	2	0	0	0	0	0
cluster_29533n	GIAGVGKT	1	0	0	0	0	0	0	0	0	0	0	0	0	0	0	0	0	0	0	0	0	0	0	0	0	0	0	0	0	0	0	0	0	0	0	0	0	0	0	0	0	0	0	0	0	0	0	0
cluster_29552n	GVAGIGKT	4	5	4	3	3	5	5	9	5	34	42	50	0	0	15	14	27	32	17	35	0	16	15	2	13	12	11	0	2	0	2	1	0	1	0	0	0	2	0	0	1	0	0	3	0	2	0	8
cluster_29584n	GIAGVGKT	1	0	0	0	0	0	0	0	0	0	0	0	0	0	0	0	0	0	0	0	0	0	0	0	0	0	0	0	0	0	0	0	0	0	0	0	0	0	0	0	0	0	0	0	0	0	0	0
cluster_29591n	GVAGIGKT	4	0	0	0	0	0	0	0	0	0	0	0	0	0	0	0	0	0	0	0	0	0	0	0	0	0	0	0	0	0	0	0	0	0	0	0	0	0	0	0	0	0	0	0	0	0	0	0
cluster_29781n	multiple	multiple	0	0	0	0	0	0	0	0	0	0	0	0	0	0	0	0	0	0	0	0	0	0	0	0	0	0	0	0	0	0	0	0	0	0	0	0	0	0	0	0	0	0	0	0	0	0	0
cluster_29879n	GVAGIGKS	2	0	0	0	0	0	0	0	0	0	0	0	0	0	0	0	0	0	0	0	0	0	0	0	0	0	0	0	0	0	0	0	0	0	0	0	0	0	0	0	0	0	0	0	0	0	0	0
cluster_29881n	GIAGVGKT	1	0	0	0	0	0	0	0	0	0	0	0	0	0	0	0	0	0	0	0	0	0	0	0	0	0	0	0	0	0	0	0	0	0	0	0	0	0	0	0	0	0	0	0	0	0	0	0
cluster_29966n	multiple	multiple	0	0	0	0	0	0	0	0	0	0	0	0	0	0	0	0	0	0	0	0	0	0	0	0	0	0	0	0	0	0	0	0	0	0	0	0	0	0	0	0	0	0	0	0	0	0	0
cluster_30010n	GIAGVGKT	1	0	0	0	0	1	0	0	0	1	4	0	1	1	0	1	0	0	2	3	0	0	1	4	4	2	3	0	1	2	4	2	0	0	3	3	9	3	1	0	3	5	3	1	2	0	0	0
cluster_30243n	GIAGVGKT	1	0	0	0	0	0	0	0	0	0	0	0	0	0	0	0	0	0	0	0	0	0	0	0	0	0	0	0	0	0	0	0	0	0	0	0	0	0	0	0	0	0	0	0	0	0	0	0
cluster_30265n	GIAGVGKT	1	0	0	0	0	0	0	0	0	0	0	0	0	0	0	0	0	5	19	0	0	12	0	6	0	4	7	0	0	0	0	0	0	0	0	0	0	0	0	0	0	0	0	0	0	0	2	0
cluster_30267n	GVAGIGKS	2	0	0	0	0	0	0	0	0	0	0	0	0	0	0	0	0	0	0	0	0	0	0	0	0	0	0	0	0	0	0	0	0	0	0	0	0	0	0	0	0	0	0	0	0	0	0	0
cluster_30272n	GIAGIGKT	3	0	0	0	0	0	0	0	0	0	0	0	0	0	0	0	0	0	0	0	0	0	0	0	0	0	0	0	0	0	0	0	0	0	0	0	0	0	0	0	0	0	0	0	0	0	0	0
cluster_30340n	GIAGIGKT	3	0	0	0	0	0	0	0	0	0	0	0	0	0	0	0	0	0	0	0	0	0	0	0	0	0	0	0	0	0	0	0	0	0	0	0	0	0	0	0	0	1	0	0	0	0	0	0
cluster_3041n	GIAGIGKT	3	19	14	11	0	14	0	14	29	0	1	1	0	2	1	0	1	0	0	0	0	0	2	0	5	0	0	0	0	0	0	0	0	0	0	0	0	0	0	0	1	0	0	0	0	0	0	0
cluster_30424n	GVAGIGKS	2	0	0	0	0	0	0	0	0	0	3	0	0	0	0	0	0	0	0	4	0	0	0	0	0	0	0	0	0	0	0	0	0	0	0	0	0	0	0	0	0	0	0	0	0	0	0	8
cluster_30459n	GVAGIGKS	2	0	0	0	0	0	0	0	0	0	0	1	0	0	0	1	0	0	13	0	0	0	10	0	8	17	18	0	0	0	0	0	0	0	0	0	0	0	0	0	0	4	0	0	0	0	0	0
cluster_30760n	GIAGVGKT	1	0	0	0	0	0	0	0	2	5	2	0	0	5	0	0	0	4	0	0	0	6	0	0	1	3	2	0	6	6	2	0	0	0	0	0	0	0	0	0	0	0	6	0	0	0	0	8
cluster_30762n	GVAGIGKT	4	0	0	0	0	0	0	0	0	0	0	0	0	0	0	0	0	0	0	0	0	0	0	0	0	0	0	0	0	0	0	0	0	0	0	0	0	0	0	0	0	0	0	0	0	0	0	0
cluster_30795n	multiple	multiple	0	0	0	0	0	0	0	0	0	0	0	0	0	0	0	0	0	0	0	0	0	0	0	0	0	0	0	0	0	0	0	0	0	0	0	0	0	0	0	0	0	0	0	0	0	0	0
cluster_30845n	GIAGIGKT	3	0	0	0	0	0	0	0	0	0	0	0	0	0	0	0	0	0	0	0	0	0	0	0	0	0	0	0	0	0	0	0	0	0	0	0	0	0	0	0	0	0	0	0	0	0	0	0
cluster_30878n	GVAGIGKT	4	0	0	0	0	0	0	0	0	0	0	0	0	0	0	0	0	0	0	0	0	0	0	0	0	0	0	0	0	0	0	0	0	0	0	0	0	0	0	0	0	0	0	0	0	0	0	0
cluster_31045n	GIAGIGKT	3	1	0	0	1	2	2	3	1	1	2	4	0	4	0	2	2	3	3	1	0	1	0	0	0	0	0	0	0	2	0	1	1	0	1	4	22	0	0	0	1	1	0	2	0	2	0	6
cluster_31058n	GVAGIGKS	2	0	0	0	0	0	0	0	0	0	0	0	0	0	0	0	0	0	0	0	0	0	0	0	0	0	0	0	0	0	0	0	0	0	0	0	0	0	0	0	0	0	0	0	0	0	0	0
cluster_31105n	GVAGIGKS	2	0	0	0	0	0	0	0	0	0	0	0	0	0	0	0	0	0	1	0	0	22	13	0	17	0	0	0	0	0	0	0	0	0	0	0	0	0	0	0	0	0	0	0	0	0	0	0
cluster_31127n	GVAGIGKS	2	0	0	0	0	0	0	0	0	0	0	0	0	0	0	0	0	0	0	0	0	0	0	0	0	0	0	0	0	0	0	0	0	0	0	0	0	0	0	0	0	0	0	0	0	0	0	0
cluster_31145n	multiple	multiple	0	0	0	0	0	0	0	0	0	0	0	0	0	0	0	0	0	0	0	0	0	0	0	0	0	0	0	0	0	0	0	0	0	0	0	0	0	0	0	0	0	0	0	0	0	0	0
cluster_31171n	GVAGIGKS	2	0	0	1	0	0	0	0	0	0	0	0	0	0	0	0	2	1	0	1	0	1	0	0	0	0	0	0	0	0	0	0	0	0	0	0	0	0	0	0	0	0	0	0	0	1	0	0
cluster_31174n	multiple	multiple	0	0	0	0	0	0	0	0	0	0	0	0	0	0	0	0	0	0	0	0	0	0	0	0	0	0	0	0	0	0	0	0	0	0	0	0	0	0	0	0	0	0	0	0	0	0	0
cluster_31189n	GVAGIGKS	2	0	0	0	0	0	0	0	0	0	0	0	1	1	0	1	0	0	0	0	1	0	3	0	0	0	1	0	10	8	1	0	0	0	0	0	59	0	0	2	0	0	0	0	4	3	1	5
cluster_3120n	GVAGIGKT	4	0	0	0	0	0	0	0	0	0	0	0	0	0	0	0	0	0	0	0	0	0	0	0	0	0	0	0	0	0	0	0	0	0	0	0	0	0	0	0	0	0	0	0	0	0	0	0
cluster_31226n	GVAGIGKT	4	0	0	0	0	0	0	0	0	0	0	0	0	0	0	0	0	0	0	0	0	0	0	0	0	0	0	0	0	0	0	0	0	0	0	0	0	0	0	0	0	0	0	0	0	0	0	0
cluster_31229n	GVAGIGKS	2	0	0	0	0	0	0	0	0	0	0	0	0	0	0	0	0	0	0	0	0	0	0	0	0	0	0	0	0	0	0	0	0	0	0	0	0	0	0	0	0	0	0	0	0	0	0	0
cluster_31231n	GVAGIGKT	4	0	0	0	0	0	0	0	0	0	0	0	0	0	0	0	0	0	0	0	0	0	0	0	0	0	0	0	0	0	0	0	0	0	0	0	0	0	0	0	0	0	0	0	0	0	0	0
cluster_31305n	GIAGIGKT	3	0	0	0	0	0	0	0	0	0	0	0	0	0	0	0	0	0	0	0	0	0	0	0	0	0	0	0	0	0	0	0	0	0	0	0	0	0	0	0	0	0	0	0	0	0	0	0
cluster_31337n	GVAGIGKS	2	0	0	0	0	0	0	0	0	0	8	0	33	7	0	0	0	0	0	0	0	0	0	0	0	0	0	0	0	0	0	0	0	0	0	0	0	0	0	1	0	0	0	0	0	0	0	0
cluster_31433n	multiple	multiple	0	0	0	0	0	0	0	0	0	0	0	0	0	0	0	0	0	0	0	0	0	0	0	0	0	0	0	0	0	0	0	0	0	0	0	0	0	0	0	0	0	0	0	0	0	0	0
cluster_31537n	multiple	multiple	0	0	0	0	0	0	0	0	0	0	0	0	0	0	0	0	0	0	0	0	0	0	0	0	0	0	0	0	0	0	0	0	0	0	0	0	0	0	0	0	0	0	0	0	0	0	0
cluster_31552n	multiple	multiple	0	0	0	0	0	0	0	0	0	0	0	0	0	0	0	0	0	0	0	0	0	0	0	0	0	0	0	0	0	0	0	0	0	0	0	0	0	0	0	0	0	0	0	0	0	0	0
cluster_31600n	GVAGIGKS	2	0	0	0	0	0	0	0	0	0	0	0	0	0	0	0	0	0	0	0	0	4	0	0	0	0	0	0	0	0	0	0	0	0	0	0	0	0	0	0	0	0	0	0	0	0	0	3
cluster_31611n	GVAGIGKS	2	0	0	0	0	0	0	0	0	0	0	0	0	0	0	0	0	0	0	0	0	0	0	0	0	0	0	0	0	0	0	0	0	0	0	0	0	2	0	0	0	0	0	0	0	0	0	0
cluster_31637n	GIAGVGKT	1	0	0	0	0	0	0	0	0	0	0	0	0	0	0	0	0	0	0	0	0	0	0	0	0	0	0	0	0	0	0	0	0	0	0	0	0	0	0	0	0	0	0	0	0	0	0	0
cluster_31690n	GVAGIGKS	2	0	0	0	0	0	0	0	0	0	0	0	0	0	0	0	0	0	0	0	0	0	0	0	0	0	0	0	0	0	0	0	0	0	0	0	0	0	0	0	0	0	0	0	0	0	0	0
cluster_31694n	GVAGIGKT	4	0	0	0	0	0	0	0	0	0	0	0	0	0	0	0	0	0	0	0	0	0	0	0	0	0	0	0	0	0	0	0	0	0	0	0	0	0	0	0	0	0	0	0	0	0	0	0
cluster_31870n	multiple	multiple	0	0	0	0	0	0	0	0	0	0	0	0	0	0	0	0	0	0	0	0	0	0	0	0	0	0	0	0	0	0	0	0	0	0	0	0	0	0	0	0	0	0	0	0	0	0	0
cluster_31954n	GVAGIGKS	2	0	0	0	0	0	0	0	0	0	0	0	0	2	0	0	5	0	0	6	0	0	0	0	0	0	0	0	0	0	0	0	0	0	0	0	0	0	0	1	0	0	0	0	0	0	0	0
cluster_31966n	GIAGVGKT	1	0	0	0	0	0	0	0	0	0	0	0	0	0	0	0	0	0	0	0	0	0	0	0	0	0	0	0	0	0	0	0	0	0	0	0	0	0	0	0	0	0	0	0	0	0	0	0
cluster_32090n	GIAGIGKT	3	0	0	0	0	0	0	0	0	0	0	0	0	0	0	0	0	0	0	0	0	0	0	0	0	0	0	0	0	0	0	0	0	0	0	0	0	0	0	0	0	0	0	0	0	0	0	9
cluster_32109n	GVAGIGKS	2	0	0	0	0	0	0	0	0	0	0	0	0	0	0	0	0	0	0	0	0	0	0	0	0	0	0	0	0	0	11	0	0	0	0	0	0	0	1	1	4	0	0	0	0	0	0	3
cluster_32154nn	GIAGVGKT	1	0	0	0	0	0	0	0	0	30	27	0	0	41	33	26	1	26	20	0	1	0	11	0	0	21	16	0	0	12	0	0	6	0	2	0	0	9	6	0	7	26	0	0	11	8	4	0
cluster_32187nn	GVAGIGKT	4	0	0	0	0	0	0	1	0	0	0	0	0	0	0	0	0	0	0	0	0	0	0	0	0	0	0	0	0	0	0	0	0	1	0	0	7	2	0	0	0	0	0	0	0	1	0	0
cluster_32425n	GVAGIGKS	2	0	0	3	0	0	0	0	0	27	3	4	5	21	34	0	3	3	1	8	0	7	10	16	13	22	18	0	0	0	0	0	0	0	0	2	0	0	1	0	2	4	1	0	1	0	0	11
cluster_32474n	GIAGIGKT	3	0	0	0	0	0	0	0	0	0	0	0	0	0	0	0	0	0	0	0	0	0	0	0	0	0	0	0	0	0	0	0	0	0	0	0	0	0	0	0	0	0	0	0	0	0	0	0
cluster_32565n	multiple	multiple	0	0	0	0	0	0	0	0	0	0	0	0	0	0	0	0	0	0	0	0	0	0	0	0	0	0	0	0	0	0	0	0	0	0	0	0	0	0	0	0	0	0	0	0	0	0	0
cluster_325n	GVAGIGKS	2	2	0	3	0	14	9	3	3	0	0	0	0	0	0	0	0	0	0	0	0	0	0	1	1	0	0	0	0	0	0	1	0	0	0	0	0	1	0	0	0	3	0	0	0	0	0	0
cluster_32700n	GVAGIGKS	2	0	0	0	0	0	0	0	0	0	21	0	0	0	0	0	0	0	22	1	0	0	12	0	0	15	25	1	0	3	7	0	0	0	3	0	78	0	0	0	0	18	0	0	13	0	4	0
cluster_32719n	multiple	multiple	0	0	0	0	0	0	0	0	0	0	0	0	0	0	0	0	0	0	0	0	0	0	0	0	0	0	0	0	0	0	0	0	0	0	0	0	0	0	0	0	0	0	0	0	0	0	0
cluster_32762n	GVAGIGKS	2	0	0	0	0	0	0	0	0	0	0	0	0	0	0	0	0	0	0	0	0	0	0	0	0	0	0	0	0	0	0	0	0	0	0	0	0	0	0	0	0	0	0	0	0	0	0	0
cluster_32817n	GVAGIGKT	4	0	0	1	0	0	0	1	1	3	0	0	0	0	0	0	0	0	2	0	0	0	0	0	0	0	0	0	0	0	0	0	0	0	0	0	0	0	0	0	0	0	0	0	0	0	0	0
cluster_32899n	GVAGIGKS	2	0	0	0	0	0	0	0	0	0	0	0	0	0	0	0	0	0	0	0	0	0	0	0	0	0	0	0	0	0	0	0	0	0	0	0	0	0	0	0	0	0	0	0	0	0	0	0
cluster_32919n	multiple	multiple	0	0	0	0	0	0	0	0	0	0	0	0	0	0	0	0	0	0	0	0	0	0	0	0	0	0	0	0	0	0	0	0	0	0	0	0	0	0	0	0	0	0	0	0	0	0	0
cluster_32974n	GVAGIGKS	2	0	0	1	0	0	0	0	0	0	0	0	0	0	0	0	15	0	0	0	0	0	9	0	0	0	0	0	2	3	0	0	0	0	0	0	0	0	0	0	0	0	0	0	5	0	0	0
cluster_33017n	GVAGIGKS	2	0	0	0	0	0	0	0	0	0	0	0	0	0	0	0	0	0	0	0	0	0	0	0	0	0	0	0	0	0	0	0	0	0	0	0	0	0	0	0	0	0	0	0	0	0	0	0
cluster_33121n	GVAGIGKT	4	4	2	0	5	3	5	1	5	6	21	6	5	2	1	5	0	2	0	0	0	0	1	0	5	0	0	0	0	8	4	3	0	2	3	1	56	1	0	2	0	9	3	1	0	2	1	0
cluster_33252n	GIAGIGKT	3	0	0	0	0	0	0	0	0	0	0	0	0	0	0	0	0	0	0	0	0	0	0	0	0	0	0	0	0	0	0	0	0	0	0	0	0	0	0	0	0	0	0	0	0	0	0	0
cluster_33292n	GVAGIGKT	4	0	0	0	0	0	0	0	0	0	5	0	7	0	0	0	0	3	2	0	0	0	3	0	8	0	0	0	0	2	0	0	0	0	0	0	0	0	0	0	0	0	0	0	0	0	0	0
cluster_33338n	GVAGIGKS	2	0	0	0	0	0	0	0	0	0	0	0	0	0	0	0	0	0	0	0	0	0	0	0	0	0	0	0	0	0	0	0	0	0	0	0	0	0	0	0	0	0	0	0	0	0	0	0
cluster_33392n	GVAGIGKS	2	0	0	0	0	0	0	0	0	0	0	0	0	0	0	0	0	0	0	0	0	0	0	0	0	0	0	0	0	0	0	0	0	0	0	0	0	0	0	0	0	0	0	0	0	0	0	0
cluster_33409n	multiple	multiple	0	0	0	0	0	0	0	0	0	0	0	0	0	0	0	0	0	0	0	0	0	0	0	0	0	0	0	0	0	0	0	0	0	0	0	0	0	0	0	0	0	0	0	0	0	0	0
cluster_33566n	GVAGIGKT	4	0	0	0	0	0	0	0	0	2	0	1	0	0	0	0	0	0	18	0	0	0	3	3	0	0	0	0	0	0	0	0	0	0	0	0	0	0	0	0	0	0	0	0	0	0	0	4
cluster_33772n	multiple	multiple	0	0	0	0	0	0	0	0	0	0	0	0	0	0	0	0	0	0	0	0	0	0	0	0	0	0	0	0	0	0	0	0	0	0	0	0	0	0	0	0	0	0	0	0	0	0	0
cluster_33955n	GVAGIGKS	2	0	0	0	0	0	0	0	0	0	0	0	0	0	0	0	0	0	0	0	0	0	0	0	0	0	0	0	0	0	0	0	0	0	0	0	0	0	0	0	0	0	0	0	0	0	0	0
cluster_34099n	GIAGIGKT	3	0	0	4	1	4	3	0	1	0	14	0	0	5	0	0	1	8	3	0	0	1	0	0	2	0	4	0	0	0	0	0	3	3	4	1	19	1	0	1	0	0	3	1	1	3	0	1
cluster_34245n	GVAGIGKT	4	5	5	0	6	2	11	5	2	0	0	0	0	0	0	1	0	0	0	0	0	0	0	0	0	0	0	0	0	0	0	0	0	2	0	0	0	0	0	0	0	0	0	0	0	0	1	0
cluster_34340n	multiple	multiple	0	0	0	0	0	0	0	0	0	0	0	0	0	0	0	0	0	0	0	0	0	0	0	0	0	0	0	0	0	0	0	0	0	0	0	0	0	0	0	0	0	0	0	0	0	0	0
cluster_34378n	GVAGIGKS	2	0	0	0	0	0	0	0	0	0	17	0	0	0	3	0	1	7	13	11	0	2	0	0	7	0	0	0	0	0	2	0	0	0	2	0	0	3	0	0	0	0	0	0	0	0	0	0
cluster_34475n	GIAGIGKT	3	0	0	0	0	0	0	0	0	0	0	0	0	0	0	0	0	0	0	0	0	0	0	0	0	0	0	0	0	0	0	0	0	0	2	0	0	0	0	0	1	10	0	2	4	0	0	0
cluster_34622n	multiple	multiple	0	0	0	0	0	0	0	0	0	0	0	0	0	0	0	0	0	0	0	0	0	0	0	0	0	0	0	0	0	0	0	0	0	0	0	0	0	0	0	0	0	0	0	0	0	0	0
cluster_34649nn	GVAGIGKS	2	0	0	0	0	0	0	0	0	23	21	0	49	0	41	0	0	34	0	1	0	0	18	13	0	47	37	0	0	0	0	7	7	0	1	0	71	0	0	0	0	0	0	2	0	0	0	0
cluster_34772n	multiple	multiple	0	0	0	0	0	0	0	0	0	0	0	0	0	0	0	0	0	0	0	0	0	0	0	0	0	0	0	0	0	0	0	0	0	0	0	0	0	0	0	0	0	0	0	0	0	0	0
cluster_34811n	GVAGIGKS	2	0	0	0	0	0	0	0	0	0	1	0	0	0	0	0	1	0	0	0	0	0	0	0	0	0	0	0	0	0	0	0	0	0	0	0	0	0	0	0	0	0	0	0	0	0	0	0
cluster_34866n	GIAGIGKT	3	0	0	0	0	0	0	0	0	0	0	0	0	0	0	0	0	0	0	0	0	0	0	0	0	0	0	0	0	0	0	0	0	0	0	0	0	0	0	0	0	0	0	0	0	0	0	0
cluster_3500n	GIAGIGKT	3	0	0	0	0	0	0	0	0	0	0	0	0	0	0	0	0	0	0	0	0	0	0	0	0	0	0	0	0	0	0	0	0	0	0	0	0	0	0	0	0	0	0	0	0	0	0	0
cluster_35118n	GVAGIGKS	2	0	0	0	0	0	0	0	0	0	0	0	0	0	0	0	0	0	0	0	0	0	0	0	0	0	0	0	0	0	0	0	0	0	0	0	0	0	0	0	0	0	0	0	0	0	0	0
cluster_35123n	GIAGIGKT	3	0	0	0	0	0	0	0	0	0	0	0	0	0	0	0	0	0	0	0	0	0	0	0	0	0	0	0	0	0	0	0	0	0	0	0	0	0	0	0	0	0	0	0	0	0	0	0
cluster_35210n	multiple	multiple	0	0	0	0	0	0	0	0	0	0	0	0	0	0	0	0	0	0	0	0	0	0	0	0	0	0	0	0	0	0	0	0	0	0	0	0	0	0	0	0	0	0	0	0	0	0	0
cluster_35237n	multiple	multiple	0	0	0	0	0	0	0	0	0	0	0	0	1	0	1	2	0	0	0	0	0	0	1	0	0	0	0	0	0	0	0	0	0	0	0	0	0	0	2	3	0	0	0	0	0	0	7
cluster_35298n	GIAGIGKT	3	0	0	0	0	0	0	0	0	0	0	0	0	0	0	0	0	0	0	0	0	0	0	0	0	0	0	0	0	0	0	0	0	0	0	0	0	0	0	0	0	0	0	0	0	0	0	0
cluster_35500n	GVAGIGKS	2	0	0	0	0	0	0	0	0	0	0	0	0	0	0	0	0	0	0	0	0	0	0	0	0	0	0	0	0	0	0	0	0	0	0	0	0	0	0	0	0	0	0	0	0	0	0	0
cluster_35628n	GVAGIGKS	2	0	0	0	0	0	0	0	0	4	7	1	14	22	10	12	0	7	0	0	0	0	1	0	5	10	8	0	0	0	0	0	0	0	0	0	0	0	0	0	0	0	0	0	0	2	0	10
cluster_357n	GIAGIGKT	3	0	1	0	0	0	0	1	0	0	0	0	0	0	0	0	0	0	0	0	0	0	0	0	0	0	0	0	0	0	0	0	0	0	0	0	0	0	0	0	0	0	0	0	0	0	0	0
cluster_35815n	GVAGIGKS	2	0	0	0	0	0	0	0	0	0	0	0	0	0	0	0	0	0	0	0	0	0	0	0	0	0	0	0	0	0	0	0	0	0	0	0	0	0	0	0	0	0	0	0	0	0	0	0
cluster_36156n	GVAGIGKT	4	0	0	0	0	0	0	0	0	0	0	0	0	0	0	0	0	0	0	0	0	0	0	0	0	0	0	0	0	0	0	0	0	0	0	0	0	0	0	0	0	0	0	0	1	1	3	0
cluster_36375n	GVAGIGKT	4	0	0	0	0	0	0	0	0	0	0	0	0	0	0	0	0	0	0	0	0	0	0	0	0	0	0	0	0	0	0	0	0	0	0	0	0	0	0	0	0	0	0	0	0	0	0	0
cluster_36404n	GIAGIGKT	3	0	0	0	0	0	0	0	0	0	0	0	0	0	0	0	0	0	0	0	0	0	0	0	0	0	0	0	0	0	0	0	0	0	0	0	0	0	0	0	0	0	0	0	0	0	0	0
cluster_36748n	GIAGVGKT	1	0	0	0	0	0	0	0	0	0	0	0	0	0	0	0	0	0	0	0	0	0	0	0	0	0	0	0	0	0	0	0	0	0	0	0	0	0	0	0	0	0	0	0	0	0	0	0
cluster_37005n	GVAGIGKS	2	0	0	0	0	0	0	0	0	0	0	0	0	0	0	0	0	0	0	0	0	0	0	0	0	0	0	0	0	0	0	0	0	0	0	0	0	0	0	0	0	0	0	0	0	0	0	0
cluster_37405n	GVAGIGKS	2	0	0	0	0	0	0	0	0	0	0	0	0	0	0	0	0	1	0	1	0	0	2	0	1	1	0	0	0	0	0	0	0	0	0	0	0	0	0	0	0	0	0	0	0	0	0	0
cluster_37412n	multiple	multiple	0	0	0	0	0	0	0	0	0	0	0	0	0	0	0	0	0	0	0	0	0	0	0	0	0	0	0	0	0	0	0	0	0	0	0	0	0	0	0	0	0	0	0	0	0	0	0
cluster_37468n	GVAGIGKS	2	0	0	0	0	0	0	0	0	0	0	0	0	0	0	0	0	0	0	0	0	0	0	0	0	0	0	0	0	0	0	0	0	0	0	0	0	0	0	0	0	0	0	0	0	0	0	0
cluster_37470n	GIAGIGKT	3	0	0	0	0	0	0	0	0	0	0	0	0	0	0	0	0	0	0	0	0	0	0	0	0	0	0	0	0	0	0	0	0	0	0	0	0	0	0	0	0	0	0	0	0	0	0	0
cluster_37510n	GIAGIGKT	3	0	0	0	0	0	0	0	0	4	11	2	5	3	17	6	13	0	5	1	2	0	2	13	6	0	0	0	0	0	0	0	1	0	0	0	0	0	0	0	0	0	1	0	0	0	1	8
cluster_37623n	GIAGIGKT	3	0	0	0	0	0	0	0	0	0	5	0	0	3	0	0	2	0	0	1	0	2	5	0	0	1	2	0	0	0	1	3	0	1	1	1	0	1	0	0	1	1	3	0	7	0	0	13
cluster_37633n	GVAGIGKS	2	0	0	0	0	0	0	0	0	0	0	0	0	0	0	0	0	0	0	0	0	0	0	0	0	0	0	0	0	0	0	0	0	0	0	0	0	0	0	0	0	0	0	0	0	0	0	0
cluster_37834n	GVAGIGKS	2	0	0	0	0	0	0	0	0	0	0	0	0	0	0	0	0	0	0	0	0	0	0	0	0	0	0	0	0	0	0	0	0	0	0	0	0	0	0	0	0	0	0	0	0	0	0	0
cluster_37910n	GIAGVGKT	1	0	0	0	0	0	0	0	0	0	0	0	0	0	0	0	0	0	0	0	0	0	0	0	0	0	0	0	0	0	0	0	0	0	0	0	0	0	0	0	0	0	0	0	0	0	0	0
cluster_38070n	GIAGVGKT	1	0	0	0	0	0	0	0	0	0	0	0	0	0	0	0	0	0	0	0	0	0	0	0	0	0	3	0	0	0	0	0	0	0	0	0	0	0	0	0	0	0	0	1	0	0	0	0
cluster_38308n	GVAGIGKS	2	0	0	0	0	0	0	0	0	0	0	0	0	0	0	0	0	0	0	0	0	0	0	0	0	0	0	0	0	0	0	0	0	0	0	0	0	0	0	0	0	0	0	0	0	0	0	0
cluster_38360n	multiple	multiple	0	0	0	0	0	0	0	0	0	0	0	0	0	0	0	0	0	0	0	0	0	0	0	0	0	0	0	0	0	0	0	0	0	0	0	0	0	0	0	0	0	0	0	0	0	0	0
cluster_38367n	GVAGIGKT	4	0	0	0	0	0	0	0	0	0	0	0	0	0	0	0	0	0	0	0	0	0	0	0	0	0	0	0	0	0	0	0	0	0	0	0	0	0	0	0	0	0	0	0	0	0	0	0
cluster_38382n	GIAGVGKT	1	0	0	0	0	0	0	0	0	0	0	0	0	0	0	0	0	0	0	0	0	0	0	0	0	0	0	0	0	0	0	0	0	0	0	0	0	0	0	0	0	0	0	0	0	0	0	0
cluster_38405n	GVAGIGKS	2	0	0	0	0	0	0	0	0	0	0	0	0	0	0	0	0	0	0	0	0	0	0	0	0	0	0	0	0	0	0	0	0	0	0	0	0	0	0	0	0	0	0	0	0	0	0	0
cluster_38529n	GIAGIGKT	3	0	0	0	0	0	0	0	0	0	0	0	0	0	0	0	0	0	0	0	0	0	0	0	0	0	0	0	0	0	0	0	0	0	0	0	0	0	0	0	0	0	0	0	0	0	0	0
cluster_39146n	GIAGVGKT	1	0	0	0	0	0	0	0	0	0	0	0	0	0	0	0	0	0	0	0	0	0	0	0	0	0	0	0	0	0	0	0	0	0	0	0	0	0	0	0	0	0	0	0	0	0	0	0
cluster_39169n	GVAGIGKS	2	0	0	0	0	0	0	0	0	0	8	0	0	0	0	0	0	0	0	0	0	11	0	0	0	0	0	0	0	0	0	0	0	0	0	0	0	0	0	0	0	2	0	0	0	0	0	3
cluster_39332n	GIAGVGKT	1	0	0	0	0	0	0	0	0	0	0	0	0	0	0	0	0	0	0	0	0	0	0	0	0	0	0	0	0	0	0	0	0	0	0	0	0	0	0	0	0	0	0	0	0	0	0	0
cluster_39788n	multiple	multiple	0	0	0	0	0	0	0	0	0	0	0	0	0	0	0	0	0	0	0	0	0	0	0	0	0	0	0	0	0	0	0	0	0	0	0	0	0	0	0	0	0	0	0	0	0	0	0
cluster_40049n	GIAGIGKT	3	0	0	0	0	0	0	0	0	0	0	0	0	0	0	0	0	0	0	0	0	0	0	0	0	0	0	0	0	0	0	0	0	0	0	0	0	0	0	0	0	0	0	0	0	0	0	0
cluster_40768n	GVAGIGKT	4	0	0	0	0	0	0	0	0	0	0	0	0	0	0	0	0	0	0	0	0	0	0	0	0	0	0	0	0	0	0	0	0	0	0	0	0	0	0	0	0	0	0	0	0	0	0	0
cluster_41140n	GIAGIGKT	3	0	0	0	0	0	0	0	0	0	0	0	0	0	0	0	0	0	0	0	0	0	0	0	0	0	0	0	0	0	0	0	0	0	0	0	0	0	0	0	0	0	0	0	0	0	0	0
cluster_41360n	GVAGIGKS	2	0	0	0	0	0	0	0	0	0	0	0	0	0	0	0	0	0	0	0	0	0	0	0	0	0	0	0	0	0	0	0	0	0	0	0	0	0	0	0	0	0	0	0	0	0	0	0
cluster_41420n	GIAGIGKT	3	0	0	0	0	0	0	0	0	0	0	0	0	0	0	0	0	0	0	0	0	0	0	0	0	0	0	0	0	0	0	0	0	0	0	0	0	0	0	0	0	0	0	0	0	0	0	0
cluster_41449n	multiple	multiple	0	0	0	0	0	0	0	0	0	0	0	0	0	0	0	0	0	0	0	0	0	0	0	0	0	0	0	0	0	0	0	0	0	0	0	0	0	0	0	0	0	0	0	0	0	0	0
cluster_41470n	GIAGIGKT	3	0	0	0	0	0	0	0	0	0	0	0	0	0	0	0	0	0	0	0	0	0	0	0	0	0	0	0	0	0	0	0	0	0	0	0	0	0	0	0	0	0	0	0	0	0	0	0
cluster_41604n	GVAGIGKS	2	0	0	0	0	0	0	0	0	0	0	0	0	0	0	0	0	0	0	0	0	0	0	0	0	0	0	0	0	0	0	0	0	0	0	0	0	0	0	0	0	0	0	0	0	0	0	0
cluster_41648n	GIAGIGKT	3	0	0	0	0	0	0	0	0	0	0	0	0	0	0	0	0	0	0	0	0	0	0	0	0	0	0	0	0	0	0	0	0	0	0	0	0	0	0	0	0	0	0	0	0	0	0	0
cluster_41977n	GVAGIGKS	2	0	0	0	0	0	0	0	0	0	0	0	0	0	0	0	0	0	0	0	0	0	0	0	0	0	0	0	0	0	0	0	0	0	0	0	0	0	0	0	0	0	0	0	0	0	0	0
cluster_41995n	multiple	multiple	0	0	0	0	0	0	0	0	0	0	1	0	0	0	0	0	0	0	0	0	0	0	0	0	0	0	0	0	0	0	0	0	0	1	0	2	0	0	0	0	0	0	0	0	0	0	0
cluster_42451n	GIAGIGKT	3	0	0	0	0	0	0	0	0	0	0	0	0	0	0	0	0	0	0	0	0	0	0	0	0	0	0	0	0	0	0	0	0	0	0	0	0	0	0	0	0	0	0	0	0	0	0	4
cluster_43193n	multiple	multiple	0	0	0	0	0	0	0	0	0	0	0	0	0	0	0	0	0	0	0	0	0	0	0	0	0	0	0	0	0	0	0	0	0	0	0	0	0	0	0	0	0	0	0	0	0	0	0
cluster_43636n	GVAGIGKS	2	0	0	0	0	0	0	0	0	0	0	0	0	0	0	0	0	0	0	0	0	0	0	0	0	0	0	0	0	0	0	0	0	0	0	0	0	0	0	0	0	0	0	0	0	0	0	0
cluster_43817n	multiple	multiple	0	0	0	0	0	0	0	0	0	0	0	0	0	0	0	0	0	0	0	0	0	0	0	0	0	0	0	0	0	0	0	0	0	0	0	0	0	0	0	0	0	0	0	0	0	0	0
cluster_44046n	multiple	multiple	0	0	0	0	0	0	0	0	0	0	0	0	0	0	0	0	0	0	0	0	0	0	0	0	0	0	0	0	0	0	0	0	0	0	0	0	0	0	0	0	0	0	0	0	0	0	0
cluster_4494n	GIAGVGKT	1	0	0	0	0	0	0	0	0	3	4	0	22	1	9	9	0	0	2	3	0	4	1	0	2	6	7	0	0	0	1	0	0	0	0	0	0	0	0	0	0	0	0	0	0	0	0	0
cluster_45031n	GIAGIGKT	3	0	0	0	0	0	0	0	0	0	0	0	0	0	0	0	0	0	0	0	0	0	0	0	0	0	0	0	0	0	0	0	0	0	0	0	0	0	0	0	0	0	0	0	0	0	0	0
cluster_45090n	GVAGIGKS	2	0	0	0	0	0	0	0	0	0	0	0	0	0	0	0	0	0	0	0	0	0	0	0	0	0	0	0	0	0	0	0	0	0	0	0	0	0	0	0	0	0	0	0	0	0	0	0
cluster_4530n	GVAGIGKT	4	9	2	9	6	20	11	5	13	7	12	0	10	3	9	3	0	6	3	2	0	0	2	0	0	0	0	0	0	0	0	0	0	0	0	0	0	0	0	0	0	0	0	0	0	0	1	0
cluster_4573n	multiple	multiple	0	0	0	0	0	0	0	0	0	0	0	0	0	0	0	0	0	0	0	0	0	0	0	0	0	0	0	0	0	0	0	0	0	0	0	0	0	0	0	0	0	0	0	0	0	0	0
cluster_4651n	multiple	multiple	3	0	0	0	0	3	2	4	18	11	4	9	3	3	7	7	1	9	6	0	5	5	3	4	10	9	0	0	0	1	1	0	2	0	0	7	0	2	2	0	4	0	1	0	0	0	1
cluster_47685n	GIAGIGKT	3	0	0	0	0	0	0	0	0	0	0	0	0	0	0	0	0	0	0	0	0	0	0	0	0	0	0	0	0	0	0	0	0	0	0	0	0	0	0	0	0	0	0	0	0	0	0	0
cluster_48037nn	GVAGIGKS	2	0	0	0	0	0	0	0	0	0	0	0	0	0	8	0	24	0	0	0	2	0	14	23	11	0	0	0	0	0	0	0	0	0	0	0	0	6	0	0	0	0	0	0	0	0	0	0
cluster_4888n	GVAGIGKS	2	0	0	0	0	0	0	0	0	0	0	0	0	0	0	0	0	0	0	0	0	0	0	0	0	0	0	0	0	0	0	0	0	0	0	0	0	0	0	0	0	0	0	0	0	0	0	0
cluster_49421n	GIAGIGKT	3	0	0	0	0	0	0	0	0	0	0	0	0	0	0	0	0	0	0	0	0	0	0	0	0	0	0	0	0	0	0	0	0	0	0	0	0	0	0	0	0	0	0	0	0	0	0	0
cluster_50329n	GVAGIGKS	2	0	0	0	0	2	0	0	0	0	0	0	0	0	0	0	0	0	0	0	0	0	0	0	0	0	0	0	1	0	0	0	0	0	0	0	2	0	0	0	0	0	0	0	0	0	0	0
cluster_50638n	GIAGIGKT	3	0	0	0	0	0	0	0	0	0	0	0	0	0	0	0	0	0	0	0	0	0	0	0	0	0	0	0	0	0	0	0	0	0	0	0	0	0	0	0	0	0	0	0	0	0	0	0
cluster_5068n	GIAGIGKT	3	0	0	0	0	0	0	0	0	0	59	0	41	0	0	0	1	15	0	0	0	13	7	0	0	27	31	0	0	0	0	0	0	0	0	1	0	0	0	0	0	0	0	0	2	0	0	0
cluster_50799n	GIAGVGKT	1	0	0	0	0	0	0	0	0	0	0	0	0	0	0	0	0	0	0	0	0	0	0	0	0	0	0	0	0	0	0	0	0	0	0	0	0	0	0	0	0	0	0	0	0	0	0	0
cluster_50844n	GIAGIGKT	3	0	0	0	0	0	0	0	0	0	0	0	0	0	0	0	0	0	0	0	0	0	0	0	0	0	0	0	0	0	0	0	0	0	0	0	0	0	0	0	0	0	0	0	0	0	0	0
cluster_5100n	GVAGIGKT	4	0	0	0	0	0	0	0	0	0	0	0	0	0	0	0	0	0	0	0	0	0	0	0	0	0	0	0	0	0	0	0	0	0	0	0	0	0	0	0	0	0	0	0	0	0	0	0
cluster_51788n	GIAGIGKT	3	0	0	0	0	0	0	0	0	0	0	0	1	0	0	0	0	1	0	0	0	1	0	1	1	0	0	0	0	0	0	0	0	0	0	0	0	0	0	0	1	0	0	0	0	0	0	0
cluster_52104n	GIAGIGKT	3	2	0	2	0	2	0	1	1	0	0	0	4	0	4	4	1	2	0	2	0	0	0	1	0	5	2	0	0	0	1	0	0	1	0	0	0	0	0	1	1	0	0	0	0	0	0	1
cluster_53250nn	GVAGIGKS	2	0	0	0	0	0	0	0	0	0	0	0	0	0	0	0	0	0	0	0	0	0	0	0	0	0	0	0	0	0	0	0	0	0	0	0	0	0	0	0	0	0	0	0	0	0	0	0
cluster_5341n	GVAGIGKS	2	0	0	0	0	0	0	0	0	13	3	8	11	2	0	13	16	0	6	3	0	3	3	2	0	0	0	0	0	0	0	0	0	0	0	0	0	0	1	1	0	0	0	0	0	0	0	0
cluster_5367n	GVAGIGKT	4	0	0	0	0	0	0	0	0	0	0	0	8	0	6	0	0	0	3	0	0	0	1	0	0	0	0	0	0	0	0	0	0	0	0	0	0	0	0	0	0	0	0	0	0	0	0	0
cluster_53866n	GIAGIGKT	3	0	0	0	0	0	0	0	0	0	0	0	0	0	0	0	0	0	0	0	0	0	0	0	0	0	0	0	0	0	0	0	0	0	0	0	0	0	0	0	0	0	0	0	0	0	0	0
cluster_54075n	GVAGIGKT	4	0	0	0	0	0	0	0	0	0	0	0	0	0	0	0	0	0	0	0	0	0	0	0	0	0	0	0	0	0	0	0	0	0	0	0	0	0	0	0	0	0	0	0	0	0	0	0
cluster_547n	GIAGIGKT	3	0	0	0	0	0	0	0	0	0	0	0	0	0	0	0	0	0	0	0	0	0	0	0	0	0	0	0	0	0	0	0	0	0	0	0	0	0	0	0	0	0	0	0	0	0	0	0
cluster_5590n	GIAGIGKT	3	0	0	0	0	0	0	0	0	0	0	0	0	0	0	0	0	0	0	0	0	0	0	0	0	0	0	0	0	0	0	0	0	0	0	0	0	0	0	0	0	0	0	0	0	0	0	0
cluster_56074n	GIAGVGKT	1	0	0	0	0	0	0	0	0	0	0	0	0	0	0	0	0	0	0	0	0	0	0	0	0	0	0	0	0	0	0	0	0	0	0	0	0	0	0	0	0	0	0	0	0	0	0	0
cluster_5617n	GVAGIGKS	2	0	0	0	0	0	0	0	0	0	0	0	0	0	0	0	0	0	0	0	0	0	0	0	0	0	0	0	0	0	0	0	0	0	0	0	0	0	0	0	0	0	0	0	0	0	0	0
cluster_56330n	GIAGVGKT	1	0	9	4	11	0	0	0	0	0	0	0	0	0	0	0	0	0	0	0	0	0	0	0	0	0	0	0	7	0	20	15	5	2	7	12	0	1	0	1	0	0	10	0	0	3	0	5
cluster_56723n	GIAGVGKT	1	0	0	0	0	0	0	0	0	0	0	0	0	0	0	0	0	0	0	0	0	0	0	0	0	0	0	0	0	0	0	0	0	0	0	0	0	0	0	0	0	0	0	0	0	0	0	0
cluster_58126n	GVAGIGKS	2	0	0	0	0	0	0	0	0	0	0	0	0	0	0	0	0	0	0	0	0	0	0	0	0	0	0	0	0	0	0	0	0	0	0	0	0	0	0	0	0	0	0	0	0	0	0	0
cluster_58173n	GIAGIGKT	3	0	0	0	0	0	0	0	0	0	0	0	0	0	0	0	0	0	0	0	0	0	0	0	0	0	0	0	0	0	0	0	0	0	0	0	0	0	0	0	0	0	0	0	0	0	0	0
cluster_583n	GIAGIGKT	3	0	0	0	0	0	0	0	0	0	0	0	0	0	0	0	0	0	0	0	0	0	0	0	0	0	0	0	0	0	0	0	0	0	0	0	0	0	0	0	0	0	0	0	0	0	0	0
cluster_5856n	multiple	multiple	0	0	0	0	0	0	0	0	0	0	0	0	0	0	0	0	0	0	0	0	0	0	0	0	0	0	0	0	0	0	0	0	0	0	0	0	0	0	0	0	0	0	0	0	0	0	0
cluster_58839n	GVAGIGKT	4	0	0	0	0	0	0	0	0	0	0	0	0	0	0	0	0	0	0	0	0	0	0	0	0	0	0	0	0	0	0	0	0	0	0	0	0	0	0	0	0	0	0	0	0	0	0	0
cluster_58908n	GVAGIGKT	4	0	0	0	0	0	0	0	0	0	0	0	0	0	0	0	0	0	0	0	0	0	0	0	0	0	0	0	0	0	0	0	0	0	0	0	0	0	0	0	0	0	0	0	0	0	0	0
cluster_5931n	GIAGIGKT	3	0	0	0	0	0	0	0	0	0	0	0	0	0	0	0	0	0	0	0	0	0	0	0	0	0	0	0	0	0	0	0	0	0	0	0	0	0	0	0	0	0	0	0	0	0	0	0
cluster_5955n	GVAGIGKS	2	0	0	0	0	0	0	0	0	0	0	0	0	0	0	0	0	0	0	0	0	0	0	0	0	0	0	0	0	0	0	0	0	0	0	0	0	0	0	0	0	0	0	0	0	0	0	0
cluster_5983n	GVAGIGKS	2	0	0	0	0	0	0	0	0	0	0	0	0	0	0	0	0	0	0	0	0	0	0	0	0	0	0	0	0	0	0	0	0	0	0	0	0	0	0	0	0	0	0	0	0	0	0	0
cluster_601n	GIAGIGKT	3	27	8	11	21	44	32	44	49	0	0	0	0	0	0	0	0	0	0	0	0	0	0	0	0	0	0	0	0	0	0	0	0	0	0	0	0	1	0	0	0	0	0	0	0	0	0	16
cluster_62326n	GVAGIGKS	2	0	0	0	0	0	0	0	0	0	0	0	0	0	0	0	0	0	0	0	0	0	0	0	0	0	0	0	0	0	0	0	0	0	0	0	0	0	0	0	0	0	0	0	0	0	0	0
cluster_62513nn	GIAGIGKT	3	0	0	0	0	0	0	0	0	0	0	0	0	0	18	0	0	0	0	0	0	0	0	0	0	0	0	0	0	0	0	0	0	0	0	0	0	0	5	0	0	0	0	0	0	0	0	1
cluster_6276n	GVAGIGKS	2	0	0	0	0	0	0	0	0	69	0	0	0	36	0	3	0	0	28	0	0	0	2	0	1	0	0	0	0	0	0	0	0	0	0	0	0	0	0	0	0	0	0	0	0	0	0	0
cluster_6331n	GIAGIGKT	3	0	0	0	0	0	0	0	0	4	9	0	5	11	2	0	9	7	2	0	0	0	0	2	4	8	7	0	0	0	0	0	0	0	0	0	0	0	0	0	0	0	0	0	0	0	0	0
cluster_6481n	GIAGIGKT	3	0	0	0	0	0	0	0	0	0	0	0	0	0	0	0	0	0	0	0	0	0	0	0	0	0	0	0	0	0	0	0	0	0	0	0	0	0	0	0	0	0	0	0	0	0	0	0
cluster_6482n	GIAGVGKT	1	0	0	0	0	0	0	0	0	0	0	0	0	0	0	0	0	0	0	0	0	0	0	0	0	0	0	0	0	0	0	0	0	0	0	0	0	0	0	0	0	0	0	0	0	0	0	0
cluster_65166n	GIAGIGKT	3	2	1	1	0	4	0	0	0	0	0	0	0	0	0	0	0	0	0	0	0	0	0	0	1	0	0	0	0	0	0	0	1	0	0	0	0	0	0	0	0	0	0	1	0	0	0	0
cluster_6586n	GVAGIGKS	2	0	0	0	0	0	0	0	0	0	0	0	0	0	0	0	0	0	0	0	0	0	0	0	0	0	0	0	0	0	0	0	0	0	0	0	0	0	0	0	0	0	0	0	0	0	0	0
cluster_6591n	multiple	multiple	0	0	0	0	0	0	0	0	0	0	16	0	0	20	8	13	0	0	0	0	0	0	0	0	0	0	0	0	0	0	0	0	0	0	0	0	0	0	0	0	0	0	0	0	0	0	0
cluster_6667n	multiple	multiple	0	0	0	0	0	0	0	0	20	0	0	0	0	0	0	0	0	0	12	0	0	9	0	0	11	14	0	0	0	0	0	0	0	0	0	0	0	0	0	0	0	0	0	0	0	0	0
cluster_6677n	GVAGIGKT	4	0	0	0	0	0	0	0	0	0	0	0	0	0	0	0	0	0	0	0	0	0	0	0	0	0	0	0	0	0	0	0	0	0	0	0	0	0	0	0	0	0	0	0	0	0	0	0
cluster_6912n	GVAGIGKT	4	0	0	0	0	0	0	0	0	4	40	0	24	8	3	3	0	8	36	2	2	0	0	0	0	46	40	0	0	0	0	0	0	0	0	0	72	0	0	0	0	0	0	1	0	0	0	1
cluster_7069n	GIAGVGKT	1	0	0	0	0	0	0	0	0	0	0	0	0	0	0	0	0	0	0	0	0	0	0	0	0	0	0	0	0	0	0	0	0	0	0	0	0	0	0	0	0	0	0	0	0	0	0	0
cluster_7174n	GIAGIGKT	3	0	0	0	0	0	0	0	0	0	0	0	0	0	0	0	0	0	0	0	0	0	0	0	0	0	0	0	0	0	0	0	0	0	0	0	0	0	0	0	0	0	0	0	0	0	0	0
cluster_7346n	multiple	multiple	0	0	0	0	0	0	0	0	0	0	0	0	0	0	0	0	0	0	0	0	0	0	0	0	0	0	0	0	0	0	0	0	0	0	0	0	0	0	0	0	0	0	0	0	0	0	0
cluster_7952n	GVAGIGKS	2	0	0	0	0	0	0	0	0	0	0	0	0	0	0	0	0	0	0	0	0	0	0	0	0	0	0	0	0	0	0	0	0	0	0	0	0	0	0	0	0	0	0	0	0	0	0	0
cluster_80176n	GIAGIGKT	3	0	0	0	0	0	0	0	0	0	0	0	0	0	0	0	0	0	0	0	0	0	0	0	0	0	0	0	0	0	0	0	0	0	0	0	0	0	0	0	0	0	0	0	0	0	0	0
cluster_8119n	GIAGIGKT	3	0	0	0	0	0	0	0	0	0	0	0	0	0	0	0	0	0	0	0	0	0	0	0	0	0	0	0	0	0	0	0	0	0	0	0	0	0	0	0	0	0	0	0	0	0	0	0
cluster_8231n	GIAGIGKT	3	0	0	0	0	0	0	0	0	0	0	0	0	0	0	0	0	0	0	0	0	0	0	0	0	0	0	0	0	0	0	0	0	0	0	0	0	0	0	0	0	0	0	0	0	0	0	0
cluster_8313n	GIAGIGKT	3	11	4	5	19	11	29	16	7	0	0	0	0	0	0	0	0	0	0	0	0	0	0	0	0	0	0	0	0	0	3	0	3	0	0	0	0	0	0	2	0	0	0	0	0	0	0	0
cluster_8392n	GIAGIGKT	3	0	0	0	0	0	0	0	0	0	0	0	0	0	0	0	0	0	0	0	0	0	0	0	0	0	0	0	0	0	0	0	0	0	0	0	0	0	0	0	0	0	0	0	0	0	0	0
cluster_8397n	GVAGIGKS	2	0	0	0	0	0	0	0	0	0	0	0	0	0	0	0	0	0	0	0	0	0	0	0	0	0	0	0	0	0	0	0	0	0	0	0	0	0	0	0	0	0	0	0	0	0	0	0
cluster_8491n	GVAGIGKS	2	11	14	7	16	15	19	20	23	0	0	0	0	0	0	0	9	0	0	0	0	0	0	0	0	0	0	1	5	3	6	4	0	1	1	0	0	9	2	2	0	0	7	0	2	3	0	1
cluster_8515n	multiple	multiple	0	0	0	0	0	0	0	0	0	0	0	0	0	0	0	0	0	0	0	0	0	0	0	0	0	0	0	0	0	0	0	0	0	0	0	0	0	0	0	0	0	0	0	0	0	0	0
cluster_8622n	GVAGIGKT	4	0	0	0	0	0	0	1	0	0	0	21	0	12	0	18	16	0	8	9	1	11	6	1	3	13	14	0	0	0	0	0	0	0	0	0	0	0	1	0	0	0	0	0	0	0	0	6
[truncated: 17 more rows]
[truncated: 46 more columns]

## Sheet: fig3S1_B30.2_venndata
Cluster	NLR	TU01	TU02	TU03	TU06	TU08	TU10	TU12	TU14	CGN1	CGN2	CGN3	CGN4	CGN5	CGN6	CGN7	CGN8	DP03	DP05	DP07	DP09	DP10	DP12	DP13	DP15	DP16	DP20	DP21	DP23	DP24	DP25	DP28	DP29	DP31	DP32	DP33	DP34	KG03	KG05	KG07	KG12	KG14	KG15	KG18	KG19	KG20	KG22	KG24	KG26
[truncated: 2,635 more rows]
[truncated: 45 more columns]

[truncated: 1 more sheets: fig3S2_4wild__Ocluster_presence]
