# Supplementary material for: Copy number variation and population-specific immune genes in the model vertebrate zebrafish
Source: eLife. 2024 Jun 4;13:e98058. doi: 10.7554/eLife.98058 (PMC11192531; doi:10.7554/eLife.98058)
Supplement: Figure 4—source data 1. [file elife-98058-fig4-data1.xlsx]

## Sheet: fig4_FISNACHT_variation
Population	Cluster	Exon	Group	No_Fish	Watterson	Pi	Ratio	Tajimas_D	Class
TU	cluster_5	FISNACHT	1	7	0.0144	0.0125	0.868	-0.393515	core
TU	cluster_6	FISNACHT	1	1	0	0	1	0	cloud
TU	cluster_31	FISNACHT	2	5	0	0	1	0	shell
TU	cluster_35	FISNACHT	2	3	0	0	1	0	shell
TU	cluster_36	FISNACHT	2	3	0	0	1	0	shell
TU	cluster_39	FISNACHT	2	7	0	0	1	0	cloud
TU	cluster_43	FISNACHT	2	7	0.0024	0.0038	1.583	2.30231	shell
TU	cluster_44	FISNACHT	2	7	0	0	1	0	shell
TU	cluster_52	FISNACHT	2	1	0	0	1	0	shell
TU	cluster_59	FISNACHT	2	3	0	0	1	0	cloud
TU	cluster_61	FISNACHT	2	1	0	0	1	0	cloud
TU	cluster_66	FISNACHT	2	2	0.0034	0.0018	0.529	-0.186134	shell
TU	cluster_71	FISNACHT	2	5	0.0002	0	0	-1.16221	cloud
TU	cluster_72	FISNACHT	2	5	0	0	1	0	cloud
TU	cluster_76	FISNACHT	2	2	0.0021	0.0018	0.857	1.92106	cloud
TU	cluster_85	FISNACHT	3	6	0.002	0.0029	1.45	2.04121	shell
TU	cluster_93	FISNACHT	3	7	0.0087	0.013	1.494	2.26879	core
TU	cluster_96	FISNACHT	3	1	0	0	1	0	cloud
TU	cluster_225	FISNACHT	2	6	0	0	1	0	shell
TU	cluster_235	FISNACHT	2	5	0	0	1	0	shell
TU	cluster_241	FISNACHT	2	7	0	0	1	0	core
TU	cluster_245	FISNACHT	2	5	0	0	1	0	cloud
TU	cluster_250	FISNACHT	2	1	0	0	1	0	cloud
TU	cluster_259	FISNACHT	2	3	0	0	1	0	shell
TU	cluster_285	FISNACHT	3	2	0	0	1	0	shell
TU	cluster_293	FISNACHT	3	4	0	0	1	0	cloud
TU	cluster_311	FISNACHT	3	4	0	0	1	0	cloud
TU	cluster_332	FISNACHT	3	1	0	0	1	0	shell
TU	cluster_339	FISNACHT	4	1	0	0	1	0	None
TU	cluster_343	FISNACHT	4	3	0	0	1	0	None
TU	cluster_353	FISNACHT	4	2	0	0	1	0	shell
TU	cluster_372	FISNACHT	1	8	0	0	1	0	shell
TU	cluster_381	FISNACHT	1	6	0	0	1	0	shell
TU	cluster_396	FISNACHT	2	7	0	0	1	0	cloud
TU	cluster_400	FISNACHT	2	3	0.0079	0.0063	0.797	0.624067	shell
TU	cluster_404	FISNACHT	2	4	0.0059	0.0067	1.135	1.61099	shell
TU	cluster_411	FISNACHT	2	4	0.0032	0.0037	1.156	1.87133	shell
TU	cluster_413	FISNACHT	2	6	0.0005	0.0002	0.4	-1.29628	shell
TU	cluster_424	FISNACHT	2	5	0.002	0.0019	0.95	0.583775	shell
TU	cluster_426	FISNACHT	2	8	0	0	1	0	cloud
TU	cluster_427	FISNACHT	2	1	0	0	1	0	cloud
TU	cluster_483	FISNACHT	3	5	0.0054	0.006	1.111	1.16044	core
TU	cluster_486	FISNACHT	3	4	0.0015	0.0019	1.266	2.10201	shell
TU	cluster_493	FISNACHT	3	8	0	0	1	0	shell
TU	cluster_496	FISNACHT	3	1	0.0056	0.0017	0.303	0.0467868	shell
TU	cluster_510	FISNACHT	3	3	0.0049	0.0049	1	1.80338	shell
TU	cluster_542	FISNACHT	4	1	0	0	1	0	None
TU	cluster_544	FISNACHT	4	6	0.0011	0.0017	1.545	2.25697	shell
TU	cluster_558	FISNACHT	1	5	0.0042	0.0016	0.38	0.951071	core
TU	cluster_561	FISNACHT	1	3	0.0039	0.0026	0.666	-0.182104	None
TU	cluster_577	FISNACHT	1	8	0	0	1	0	shell
TU	cluster_587	FISNACHT	2	4	0.0039	0.0043	1.102	1.4165	shell
TU	cluster_590	FISNACHT	2	1	0.0005	0.0002	0.4	0.649981	cloud
TU	cluster_592	FISNACHT	2	5	0	0	1	0	cloud
TU	cluster_596	FISNACHT	2	3	0.0022	0.0023	1.045	1.92932	cloud
TU	cluster_608	FISNACHT	2	2	0.004	0.0025	0.625	0.364875	shell
TU	cluster_612	FISNACHT	2	1	0.0045	0.0012	0.266	-0.274603	shell
TU	cluster_617	FISNACHT	2	7	0.0024	0.0028	1.166	0.630522	shell
TU	cluster_627	FISNACHT	2	5	0	0	1	0	cloud
TU	cluster_630	FISNACHT	2	6	0.0009	0.0004	0.444	-1.70126	cloud
TU	cluster_632	FISNACHT	2	1	0.0085	0.0042	0.494	2.58198	cloud
TU	cluster_650	FISNACHT	3	3	0	0	1	0	cloud
TU	cluster_651	FISNACHT	3	3	0	0	1	0	cloud
TU	cluster_671	FISNACHT	3	7	0	0	1	0	shell
TU	cluster_681	FISNACHT	3	7	0.0003	0.0004	1.333	1.1382	shell
TU	cluster_686	FISNACHT	3	1	0.0005	0.0001	0.2	0.155746	shell
TU	cluster_687	FISNACHT	3	4	0.0002	0	0	-1.16221	None
TU	cluster_698	FISNACHT	3	8	0.0049	0.0059	1.204	0.805468	shell
TU	cluster_779	FISNACHT	1	1	0	0	1	0	shell
TU	cluster_790	FISNACHT	2	5	0	0	1	0	core
TU	cluster_796	FISNACHT	2	7	0	0	1	0	shell
TU	cluster_805	FISNACHT	2	8	0.0001	0	0	-1.16221	shell
TU	cluster_843	FISNACHT	2	3	0	0	1	0	cloud
TU	cluster_844	FISNACHT	2	5	0.0034	0.0034	1	1.53368	core
TU	cluster_850	FISNACHT	2	6	0	0	1	0	cloud
TU	cluster_862	FISNACHT	3	8	0	0	1	0	core
TU	cluster_892	FISNACHT	3	7	0	0	1	0	core
TU	cluster_904	FISNACHT	3	5	0.0046	0.0063	1.369	2.41059	shell
TU	cluster_949	FISNACHT	4	5	0.0018	0.0023	1.277	1.93393	shell
TU	cluster_952	FISNACHT	4	7	0	0	1	0	shell
TU	cluster_957	FISNACHT	4	8	0.0006	0.0002	0.333	-1.69654	core
TU	cluster_961	FISNACHT	4	1	0	0	1	0	cloud
TU	cluster_976	FISNACHT	1	2	0	0	1	0	core
TU	cluster_980n	FISNACHT	3	8	0	0	1	0	cloud
TU	cluster_1039n	FISNACHT	2	6	0	0	1	0	shell
TU	cluster_1288n	FISNACHT	4	3	0	0	1	0	cloud
TU	cluster_1488n	FISNACHT	3	1	0	0	1	0	None
TU	cluster_1849n	FISNACHT	4	2	0	0	1	0	None
TU	cluster_1855n	FISNACHT	3	1	0	0	1	0	cloud
TU	cluster_2003	FISNACHT	1	8	0	0	1	0	shell
TU	cluster_2069	FISNACHT	2	3	0	0	1	0	shell
TU	cluster_2208	FISNACHT	3	3	0	0	1	0	shell
TU	cluster_2239	FISNACHT	3	4	0	0	1	0	cloud
TU	cluster_2242	FISNACHT	3	6	0	0	1	0	shell
TU	cluster_2289	FISNACHT	3	2	0	0	1	0	shell
TU	cluster_2304	FISNACHT	4	3	0	0	1	0	cloud
TU	cluster_2311	FISNACHT	4	3	0	0	1	0	shell
TU	cluster_2315	FISNACHT	4	6	0	0	1	0	core
TU	cluster_2330	FISNACHT	4	2	0	0	1	0	shell
TU	cluster_2356	FISNACHT	1	1	0	0	1	0	core
TU	cluster_2391	FISNACHT	1	5	0	0	1	0	shell
TU	cluster_2392	FISNACHT	1	6	0	0	1	0	shell
TU	cluster_2398	FISNACHT	1	2	0	0	1	0	shell
TU	cluster_2431	FISNACHT	2	4	0	0	1	0	cloud
TU	cluster_2487	FISNACHT	2	3	0	0	1	0	cloud
TU	cluster_2504	FISNACHT	2	7	0	0	1	0	cloud
TU	cluster_2546	FISNACHT	3	4	0	0	1	0	shell
TU	cluster_2551	FISNACHT	3	1	0	0	1	0	shell
TU	cluster_2631	FISNACHT	3	3	0	0	1	0	shell
TU	cluster_2655	FISNACHT	3	1	0	0	1	0	cloud
TU	cluster_2833	FISNACHT	2	6	0	0	1	0	shell
TU	cluster_2886	FISNACHT	2	8	0	0	1	0	shell
TU	cluster_3041n	FISNACHT	3	1	0	0	1	0	shell
TU	cluster_3108	FISNACHT	2	2	0	0	1	0	cloud
TU	cluster_3152	FISNACHT	2	3	0	0	1	0	core
TU	cluster_3183	FISNACHT	2	5	0	0	1	0	shell
TU	cluster_3478	FISNACHT	2	8	0	0	1	0	shell
TU	cluster_3548	FISNACHT	3	5	0	0	1	0	shell
TU	cluster_3690	FISNACHT	4	4	0	0	1	0	shell
TU	cluster_3704	FISNACHT	1	1	0	0	1	0	shell
TU	cluster_3728	FISNACHT	1	2	0	0	1	0	shell
TU	cluster_3751	FISNACHT	2	8	0	0	1	0	shell
TU	cluster_3931	FISNACHT	1	2	0	0	1	0	shell
TU	cluster_4078	FISNACHT	3	3	0.0079	0.0089	1.126	2.55838	shell
TU	cluster_4144	FISNACHT	1	1	0	0	1	0	shell
TU	cluster_4174	FISNACHT	2	7	0.0001	0	0	-1.16221	shell
TU	cluster_4285	FISNACHT	3	3	0.0024	0.0016	0.666	-0.260598	shell
TU	cluster_4408	FISNACHT	2	2	0	0	1	0	cloud
TU	cluster_4530n	FISNACHT	4	6	0	0	1	0	shell
TU	cluster_4642	FISNACHT	1	4	0	0	1	0	shell
TU	cluster_4651n	FISNACHT	multiple	7	0	0	1	0	core
TU	cluster_4833	FISNACHT	3	6	0.0013	0.0015	1.153	1.00269	cloud
TU	cluster_4835	FISNACHT	3	5	0	0	1	0	shell
TU	cluster_4864	FISNACHT	1	6	0	0	1	0	shell
TU	cluster_4914	FISNACHT	2	5	0.0018	0.0023	1.277	2.01105	cloud
TU	cluster_4951	FISNACHT	3	3	0.0009	0.0008	0.888	0.841895	cloud
TU	cluster_5322	FISNACHT	3	5	0.0048	0.0045	0.937	0.324933	shell
TU	cluster_5401	FISNACHT	multiple	3	0	0	1	0	shell
TU	cluster_5410	FISNACHT	2	1	0	0	1	0	shell
TU	cluster_5465	FISNACHT	3	4	0.0045	0.0028	0.622	-0.147585	core
TU	cluster_5469	FISNACHT	3	1	0	0	1	0	shell
TU	cluster_5528	FISNACHT	4	1	0	0	1	0	cloud
TU	cluster_5543	FISNACHT	1	5	0	0	1	0	shell
TU	cluster_5561	FISNACHT	1	2	0	0	1	0	shell
TU	cluster_5562	FISNACHT	1	1	0	0	1	0	shell
TU	cluster_5581	FISNACHT	2	5	0.0034	0.0035	1.029	0.763619	shell
TU	cluster_5622	FISNACHT	2	5	0.0046	0.0061	1.326	2.12545	shell
TU	cluster_5626	FISNACHT	2	1	0	0	1	0	core
TU	cluster_5649	FISNACHT	3	3	0	0	1	0	shell
TU	cluster_5661	FISNACHT	3	3	0.0027	0.0013	0.481	-1.06144	cloud
TU	cluster_5674	FISNACHT	3	2	0.0027	0.0007	0.259	-1.78618	shell
TU	cluster_5687	FISNACHT	3	1	0.0039	0.001	0.256	-0.599117	cloud
TU	cluster_5728	FISNACHT	4	3	0.0096	0.0096	1	1.84015	shell
TU	cluster_5812	FISNACHT	2	1	0.009	0.0033	0.366	0.804784	shell
TU	cluster_5815	FISNACHT	2	6	0.0056	0.0032	0.571	-0.0424449	shell
TU	cluster_5826	FISNACHT	2	1	0	0	1	0	shell
TU	cluster_5867	FISNACHT	3	1	0	0	1	0	shell
TU	cluster_5920	FISNACHT	3	4	0.0059	0.005	0.847	0.38302	cloud
TU	cluster_5960	FISNACHT	1	3	0	0	1	0	shell
TU	cluster_6008	FISNACHT	2	2	0.0012	0.0011	0.916	2.16048	cloud
TU	cluster_6072	FISNACHT	3	5	0	0	1	0	core
TU	cluster_6073	FISNACHT	3	4	0.0035	0.0047	1.342	2.92812	shell
TU	cluster_6097	FISNACHT	multiple	2	0	0	1	0	cloud
TU	cluster_6114	FISNACHT	3	1	0	0	1	0	cloud
TU	cluster_6212	FISNACHT	2	7	0.0012	0.0009	0.75	-0.656234	shell
TU	cluster_6215	FISNACHT	3	7	0.0082	0.0117	1.426	2.05406	shell
TU	cluster_6216	FISNACHT	3	2	0.0111	0.0078	0.702	1.06612	core
TU	cluster_6225	FISNACHT	3	4	0	0	1	0	shell
TU	cluster_6231	FISNACHT	3	4	0.001	0.0009	0.9	0.221626	cloud
TU	cluster_6234	FISNACHT	3	3	0	0	1	0	shell
TU	cluster_6282	FISNACHT	1	8	0.0008	0.0012	1.5	1.55246	shell
TU	cluster_6290	FISNACHT	1	1	0	0	1	0	shell
TU	cluster_6303	FISNACHT	2	4	0	0	1	0	core
TU	cluster_6308	FISNACHT	2	3	0	0	1	0	cloud
TU	cluster_6311	FISNACHT	2	3	0	0	1	0	core
TU	cluster_6341	FISNACHT	2	7	0	0	1	0	shell
TU	cluster_6368	FISNACHT	3	4	0.0015	0.0006	0.4	-1.61821	cloud
TU	cluster_6373	FISNACHT	3	4	0	0	1	0	core
TU	cluster_6379	FISNACHT	3	6	0	0	1	0	shell
TU	cluster_6502	FISNACHT	3	5	0.0066	0.0074	1.121	1.17407	shell
TU	cluster_6503	FISNACHT	3	6	0.0039	0.0055	1.41	2.09161	shell
TU	cluster_6504	FISNACHT	3	6	0	0	1	0	core
TU	cluster_6509	FISNACHT	3	5	0	0	1	0	core
TU	cluster_6531	FISNACHT	3	2	0.0099	0.0056	0.565	0.0892456	shell
TU	cluster_6544	FISNACHT	3	2	0.0086	0.0065	0.755	1.33898	cloud
TU	cluster_6561	FISNACHT	4	5	0.0034	0.0041	1.205	1.58314	shell
TU	cluster_6564	FISNACHT	4	6	0.0035	0.0036	1.028	0.446131	shell
TU	cluster_6605	FISNACHT	2	1	0	0	1	0	cloud
TU	cluster_6609	FISNACHT	2	4	0.0048	0.0041	0.854	0.371457	shell
TU	cluster_6611	FISNACHT	2	4	0	0	1	0	cloud
TU	cluster_6612	FISNACHT	2	2	0	0	1	0	shell
TU	cluster_6619	FISNACHT	2	4	0	0	1	0	shell
TU	cluster_6642	FISNACHT	3	1	0	0	1	0	shell
TU	cluster_6643	FISNACHT	3	1	0	0	1	0	shell
TU	cluster_6656	FISNACHT	3	1	0.0164	0.0069	0.42	1.56359	shell
TU	cluster_6658	FISNACHT	3	5	0	0	1	0	core
TU	cluster_6662	FISNACHT	3	1	0.0005	0	0	-1.0535	shell
TU	cluster_6663	FISNACHT	3	2	0.0096	0.0075	0.781	1.60841	shell
TU	cluster_6676	FISNACHT	3	2	0.004	0.0024	0.6	0.257119	shell
TU	cluster_6689	FISNACHT	4	4	0.0081	0.0102	1.259	2.51375	core
TU	cluster_6694	FISNACHT	1	1	0.0159	0.0068	0.427	1.66224	shell
TU	cluster_6698	FISNACHT	1	2	0.0074	0.0053	0.716	1.86747	shell
TU	cluster_6708	FISNACHT	1	1	0	0	1	0	shell
TU	cluster_6710	FISNACHT	1	1	0.0022	0.0004	0.181	-1.29318	shell
TU	cluster_6712	FISNACHT	1	1	0.0141	0.0071	0.503	2.72718	shell
TU	cluster_6718	FISNACHT	multiple	6	0.0013	0.0018	1.384	1.84784	shell
TU	cluster_6726	FISNACHT	2	5	0	0	1	0	core
TU	cluster_6738	FISNACHT	2	1	0	0	1	0	shell
TU	cluster_6755	FISNACHT	multiple	1	0	0	1	0	shell
TU	cluster_6760	FISNACHT	multiple	6	0.003	0.0028	0.933	0.484161	shell
TU	cluster_6767	FISNACHT	multiple	7	0	0	1	0	core
TU	cluster_6780	FISNACHT	3	2	0	0	1	0	shell
TU	cluster_6792	FISNACHT	3	4	0.0076	0.01	1.315	2.84209	shell
TU	cluster_6793	FISNACHT	3	2	0	0	1	0	shell
TU	cluster_6803	FISNACHT	3	7	0	0	1	0	core
TU	cluster_6815	FISNACHT	4	3	0.0022	0.0018	0.818	0.666826	shell
TU	cluster_6829	FISNACHT	1	1	0	0	1	0	shell
TU	cluster_6849	FISNACHT	1	5	0.0006	0.0004	0.666	-0.422127	shell
TU	cluster_6855	FISNACHT	2	1	0	0	1	0	cloud
TU	cluster_6921	FISNACHT	3	3	0.0044	0.0041	0.931	1.27961	shell
TU	cluster_6935	FISNACHT	3	5	0.0034	0.0041	1.205	1.62155	cloud
TU	cluster_6981	FISNACHT	1	8	0.0006	0.0008	1.333	0.921097	shell
TU	cluster_7107	FISNACHT	2	3	0.0044	0.0036	0.818	0.634876	shell
TU	cluster_7138	FISNACHT	2	5	0.0036	0.0042	1.166	1.54823	shell
TU	cluster_7139	FISNACHT	2	1	0.0011	0.0005	0.454	1.15484	cloud
TU	cluster_7146	FISNACHT	2	1	0.0176	0.0066	0.375	1.03594	shell
TU	cluster_7170	FISNACHT	3	1	0	0	1	0	cloud
TU	cluster_7241	FISNACHT	1	5	0	0	1	0	core
TU	cluster_7242	FISNACHT	1	7	0	0	1	0	core
TU	cluster_7245	FISNACHT	1	7	0.006	0.0085	1.416	1.76991	core
TU	cluster_7256	FISNACHT	1	6	0.0015	0.0021	1.4	1.95531	shell
TU	cluster_7260	FISNACHT	1	1	0	0	1	0	core
TU	cluster_7261	FISNACHT	1	3	0.0019	0.0024	1.263	2.77498	shell
TU	cluster_7262	FISNACHT	1	4	0	0	1	0	shell
TU	cluster_7268	FISNACHT	1	1	0	0	1	0	shell
TU	cluster_7280	FISNACHT	1	1	0	0	1	0	cloud
TU	cluster_7281	FISNACHT	1	7	0.0019	0.0015	0.789	-0.612446	core
TU	cluster_7289	FISNACHT	1	3	0.0149	0.008	0.536	-0.943207	shell
TU	cluster_7311	FISNACHT	2	4	0	0	1	0	shell
TU	cluster_7329	FISNACHT	2	6	0	0	1	0	core
TU	cluster_7331	FISNACHT	2	6	0	0	1	0	cloud
TU	cluster_7332	FISNACHT	2	7	0	0	1	0	shell
TU	cluster_7337	FISNACHT	2	5	0	0	1	0	shell
TU	cluster_7338	FISNACHT	2	5	0.0042	0.0058	1.38	2.55904	shell
TU	cluster_7342	FISNACHT	2	3	0	0	1	0	shell
TU	cluster_7344	FISNACHT	2	5	0.0066	0.0073	1.106	1.63588	shell
TU	cluster_7354	FISNACHT	2	3	0	0	1	0	cloud
TU	cluster_7376	FISNACHT	2	4	0	0	1	0	shell
TU	cluster_7377	FISNACHT	2	8	0	0	1	0	shell
TU	cluster_7385	FISNACHT	2	5	0	0	1	0	core
TU	cluster_7397	FISNACHT	2	3	0	0	1	0	core
TU	cluster_7434	FISNACHT	3	4	0.0045	0.0054	1.2	2.00796	core
TU	cluster_7436	FISNACHT	3	2	0	0	1	0	core
TU	cluster_7438	FISNACHT	3	2	0	0	1	0	core
TU	cluster_7446	FISNACHT	3	2	0.0018	0.0017	0.944	2.34854	shell
TU	cluster_7448	FISNACHT	3	1	0.0147	0.0057	0.387	1.06564	shell
TU	cluster_7457	FISNACHT	3	5	0	0	1	0	core
TU	cluster_7458	FISNACHT	3	3	0.0039	0.0014	0.358	-1.85724	shell
TU	cluster_7464	FISNACHT	3	2	0	0	1	0	shell
TU	cluster_7474	FISNACHT	3	2	0.0037	0.0033	0.891	2.43931	shell
TU	cluster_7488	FISNACHT	3	2	0	0	1	0	shell
TU	cluster_7497	FISNACHT	3	8	0.0039	0.0053	1.358	1.32451	core
TU	cluster_7505	FISNACHT	3	1	0	0	1	0	shell
TU	cluster_7518	FISNACHT	3	6	0.0071	0.0085	1.197	1.11882	core
TU	cluster_7520	FISNACHT	3	4	0.005	0.0048	0.96	0.81383	cloud
TU	cluster_7522	FISNACHT	3	1	0	0	1	0	shell
TU	cluster_7585	FISNACHT	3	5	0	0	1	0	shell
TU	cluster_7624	FISNACHT	3	5	0	0	1	0	shell
TU	cluster_7625	FISNACHT	3	1	0	0	1	0	cloud
TU	cluster_7633	FISNACHT	4	1	0	0	1	0	shell
TU	cluster_7634	FISNACHT	4	6	0.005	0.0047	0.94	0.0825706	shell
TU	cluster_7638	FISNACHT	4	1	0	0	1	0	None
TU	cluster_7645	FISNACHT	4	7	0.0021	0.0031	1.476	2.00441	core
TU	cluster_7708	FISNACHT	2	1	0	0	1	0	shell
TU	cluster_7771	FISNACHT	2	3	0	0	1	0	shell
TU	cluster_7772	FISNACHT	2	5	0.0058	0.0062	1.068	1.21427	shell
TU	cluster_7781	FISNACHT	3	5	0.0022	0.0016	0.727	-0.398263	shell
TU	cluster_7806	FISNACHT	3	5	0.004	0.0027	0.675	0.134382	shell
TU	cluster_7826	FISNACHT	3	2	0	0	1	0	shell
TU	cluster_7834	FISNACHT	4	2	0.0009	0.0005	0.555	0.331264	shell
TU	cluster_7851	FISNACHT	4	4	0.0081	0.0093	1.148	1.96781	shell
TU	cluster_7897	FISNACHT	2	4	0.0056	0.007	1.25	2.22768	shell
TU	cluster_7913	FISNACHT	3	2	0.0052	0.0022	0.423	-0.9328	None
TU	cluster_7940	FISNACHT	4	1	0	0	1	0	cloud
TU	cluster_7941	FISNACHT	4	6	0.0054	0.0078	1.444	2.3188	core
TU	cluster_7942	FISNACHT	4	2	0	0	1	0	core
TU	cluster_7959	FISNACHT	1	3	0.0072	0.0054	0.75	0.369063	core
TU	cluster_7997	FISNACHT	3	8	0.0003	0	0	-1.16221	shell
TU	cluster_8002	FISNACHT	3	5	0	0	1	0	shell
TU	cluster_8026	FISNACHT	4	6	0.0013	0.0018	1.384	1.68751	cloud
TU	cluster_8081	FISNACHT	3	3	0	0	1	0	shell
TU	cluster_8339	FISNACHT	1	5	0	0	1	0	shell
TU	cluster_8360	FISNACHT	1	4	0.0024	0.0028	1.166	1.80515	shell
TU	cluster_8382	FISNACHT	2	1	0.0005	0.0003	0.6	1.52862	None
TU	cluster_8428	FISNACHT	3	8	0.001	0.0002	0.2	-1.69654	cloud
TU	cluster_8438	FISNACHT	3	2	0.0009	0.0002	0.222	-1.33136	cloud
TU	cluster_8460	FISNACHT	3	2	0.0061	0.0026	0.426	-0.92238	cloud
TU	cluster_8487	FISNACHT	4	5	0	0	1	0	core
TU	cluster_8512	FISNACHT	1	2	0	0	1	0	shell
TU	cluster_8513	FISNACHT	1	7	0.0141	0.0193	1.368	2.00634	shell
TU	cluster_8518	FISNACHT	1	8	0.0003	0.0005	1.666	1.6871	core
TU	cluster_8527	FISNACHT	2	3	0	0	1	0	shell
TU	cluster_8536	FISNACHT	2	2	0	0	1	0	cloud
TU	cluster_8628	FISNACHT	2	1	0.0096	0.0016	0.166	-1.79363	cloud
TU	cluster_8648	FISNACHT	2	1	0.0017	0.0005	0.294	0.29388	cloud
TU	cluster_8942	FISNACHT	2	4	0.0089	0.0087	0.977	1.02876	cloud
TU	cluster_9052	FISNACHT	3	1	0	0	1	0	shell
TU	cluster_9110	FISNACHT	3	1	0.0022	0.0008	0.363	0.414911	cloud
TU	cluster_9267	FISNACHT	2	2	0.0096	0.0067	0.697	1.09649	shell
TU	cluster_9279	FISNACHT	2	2	0	0	1	0	shell
TU	cluster_9374	FISNACHT	3	5	0.0014	0.0014	1	0.59335	shell
TU	cluster_9376	FISNACHT	3	1	0	0	1	0	shell
TU	cluster_9395	FISNACHT	3	4	0.0045	0.0032	0.711	-0.465428	shell
TU	cluster_9429	FISNACHT	4	7	0.0057	0.0092	1.614	2.60638	cloud
TU	cluster_9473	FISNACHT	1	5	0.0036	0.0036	1	1.96864	shell
TU	cluster_9526	FISNACHT	2	5	0.0082	0.0078	0.951	1.39658	cloud
TU	cluster_9615	FISNACHT	3	2	0.0058	0.002	0.344	-1.51176	shell
TU	cluster_9628	FISNACHT	3	6	0.0047	0.0048	1.021	0.453777	shell
TU	cluster_9762	FISNACHT	2	7	0	0	1	0	shell
TU	cluster_12665n	FISNACHT	3	8	0	0	1	0	shell
TU	cluster_13935n	FISNACHT	3	7	0	0	1	0	shell
TU	cluster_14521n	FISNACHT	3	8	0	0	1	0	shell
TU	cluster_15445n	FISNACHT	2	1	0	0	1	0	cloud
TU	cluster_16163n	FISNACHT	3	1	0	0	1	0	shell
TU	cluster_17652n	FISNACHT	3	4	0	0	1	0	shell
TU	cluster_17716n	FISNACHT	1	5	0	0	1	0	core
TU	cluster_17903n	FISNACHT	1	8	0	0	1	0	shell
TU	cluster_19499n	FISNACHT	3	7	0	0	1	0	shell
TU	cluster_20333n	FISNACHT	3	6	0	0	1	0	shell
TU	cluster_20433n	FISNACHT	2	4	0	0	1	0	shell
TU	cluster_21278n	FISNACHT	1	8	0	0	1	0	shell
TU	cluster_21365n	FISNACHT	3	2	0	0	1	0	shell
TU	cluster_22212n	FISNACHT	3	1	0	0	1	0	shell
TU	cluster_23270n	FISNACHT	2	6	0	0	1	0	shell
TU	cluster_25517n	FISNACHT	3	7	0	0	1	0	core
TU	cluster_25831n	FISNACHT	3	6	0	0	1	0	shell
TU	cluster_25957n	FISNACHT	4	6	0	0	1	0	shell
TU	cluster_26319n	FISNACHT	2	6	0	0	1	0	shell
TU	cluster_27052n	FISNACHT	3	5	0	0	1	0	shell
TU	cluster_30010n	FISNACHT	1	5	0	0	1	0	shell
TU	cluster_30459n	FISNACHT	2	7	0	0	1	0	shell
TU	cluster_30760n	FISNACHT	1	2	0	0	1	0	shell
TU	cluster_31189n	FISNACHT	2	8	0	0	1	0	shell
TU	cluster_31870n	FISNACHT	multiple	1	0	0	1	0	cloud
TU	cluster_32187nn	FISNACHT	4	1	0	0	1	0	cloud
TU	cluster_32425n	FISNACHT	2	1	0	0	1	0	core
TU	cluster_33121n	FISNACHT	4	5	0	0	1	0	shell
TU	cluster_34099n	FISNACHT	3	8	0	0	1	0	shell
TU	cluster_34811n	FISNACHT	2	6	0	0	1	0	cloud
TU	cluster_35237n	FISNACHT	multiple	5	0	0	1	0	shell
TU	cluster_35628n	FISNACHT	2	6	0	0	1	0	shell
TU	cluster_37405n	FISNACHT	2	8	0	0	1	0	cloud
TU	cluster_37510n	FISNACHT	3	6	0	0	1	0	shell
TU	cluster_37623n	FISNACHT	3	8	0	0	1	0	shell
TU	cluster_51788n	FISNACHT	3	8	0.0003	0.0001	0.333	-1.49796	cloud
TU	cluster_53250nn	FISNACHT	2	1	0.0073	0.0013	0.178	-1.50863	shell
TU	cluster_65166n	FISNACHT	3	5	0.0038	0.0022	0.578	-1.27652	shell
CGN	cluster_3	FISNACHT	1	7	0	0	1	0	cloud
CGN	cluster_5	FISNACHT	1	8	0.0058	0.0101	1.741	2.84842	core
CGN	cluster_6	FISNACHT	1	8	0	0	1	0	cloud
CGN	cluster_24	FISNACHT	1	8	0	0	1	0	shell
CGN	cluster_25	FISNACHT	1	7	0	0	1	0	cloud
CGN	cluster_31	FISNACHT	2	8	0	0	1	0	shell
CGN	cluster_34	FISNACHT	2	3	0	0	1	0	shell
CGN	cluster_35	FISNACHT	2	8	0	0	1	0	shell
CGN	cluster_36	FISNACHT	2	2	0	0	1	0	shell
CGN	cluster_37	FISNACHT	2	8	0	0	1	0	cloud
CGN	cluster_39	FISNACHT	2	6	0	0	1	0	cloud
CGN	cluster_40	FISNACHT	2	7	0	0	1	0	shell
CGN	cluster_41	FISNACHT	2	8	0.0027	0.0029	1.074	0.309218	shell
CGN	cluster_42	FISNACHT	2	7	0	0	1	0	shell
CGN	cluster_43	FISNACHT	2	8	0.0005	0.0002	0.4	-1.69654	shell
CGN	cluster_44	FISNACHT	2	8	0	0	1	0	shell
CGN	cluster_48	FISNACHT	2	8	0	0	1	0	cloud
CGN	cluster_52	FISNACHT	2	8	0.0015	0.0006	0.4	-2.14934	shell
CGN	cluster_54	FISNACHT	2	7	0.0001	0	0	-1.16221	shell
CGN	cluster_57	FISNACHT	2	8	0	0	1	0	cloud
CGN	cluster_59	FISNACHT	2	8	0	0	1	0	cloud
CGN	cluster_60	FISNACHT	2	7	0.0003	0.0001	0.333	-1.4279	cloud
CGN	cluster_61	FISNACHT	2	8	0	0	1	0	cloud
CGN	cluster_62	FISNACHT	2	8	0.0018	0.0034	1.888	2.90807	shell
CGN	cluster_63	FISNACHT	2	8	0.0005	0	0	-1.16221	cloud
CGN	cluster_66	FISNACHT	2	7	0	0	1	0	shell
CGN	cluster_68	FISNACHT	2	5	0.0002	0	0	-1.16221	cloud
CGN	cluster_71	FISNACHT	2	6	0	0	1	0	cloud
CGN	cluster_72	FISNACHT	2	6	0	0	1	0	cloud
CGN	cluster_74	FISNACHT	2	7	0	0	1	0	cloud
CGN	cluster_78	FISNACHT	2	7	0	0	1	0	shell
CGN	cluster_79	FISNACHT	2	2	0.0009	0.0002	0.222	-1.69654	shell
CGN	cluster_84	FISNACHT	3	8	0	0	1	0	shell
CGN	cluster_85	FISNACHT	3	8	0.0042	0.0059	1.404	1.43541	shell
CGN	cluster_86	FISNACHT	3	8	0.0001	0.0001	1	-0.264521	cloud
CGN	cluster_91	FISNACHT	3	7	0.0001	0	0	-1.16221	cloud
CGN	cluster_92	FISNACHT	3	8	0.0001	0	0	-1.16221	cloud
CGN	cluster_93	FISNACHT	3	8	0.0063	0.0089	1.412	1.6656	core
CGN	cluster_95	FISNACHT	3	7	0	0	1	0	shell
CGN	cluster_96	FISNACHT	3	7	0.0001	0	0	-1.16221	cloud
CGN	cluster_200	FISNACHT	1	3	0	0	1	0	cloud
CGN	cluster_208	FISNACHT	1	4	0	0	1	0	None
CGN	cluster_220	FISNACHT	2	4	0	0	1	0	cloud
CGN	cluster_223	FISNACHT	2	5	0	0	1	0	cloud
CGN	cluster_225	FISNACHT	2	8	0	0	1	0	shell
CGN	cluster_231	FISNACHT	2	8	0	0	1	0	cloud
CGN	cluster_235	FISNACHT	2	8	0	0	1	0	shell
CGN	cluster_237	FISNACHT	2	1	0	0	1	0	cloud
CGN	cluster_241	FISNACHT	2	7	0	0	1	0	core
CGN	cluster_245	FISNACHT	2	2	0	0	1	0	cloud
CGN	cluster_248	FISNACHT	2	8	0	0	1	0	cloud
CGN	cluster_250	FISNACHT	2	8	0	0	1	0	cloud
CGN	cluster_259	FISNACHT	2	7	0	0	1	0	shell
CGN	cluster_263	FISNACHT	2	8	0	0	1	0	cloud
CGN	cluster_283	FISNACHT	3	7	0	0	1	0	shell
CGN	cluster_285	FISNACHT	3	8	0	0	1	0	shell
CGN	cluster_293	FISNACHT	3	7	0	0	1	0	cloud
CGN	cluster_298	FISNACHT	3	8	0	0	1	0	shell
CGN	cluster_311	FISNACHT	3	8	0	0	1	0	cloud
CGN	cluster_315	FISNACHT	3	3	0	0	1	0	cloud
CGN	cluster_318	FISNACHT	3	8	0	0	1	0	shell
CGN	cluster_325n	FISNACHT	2	6	0	0	1	0	cloud
CGN	cluster_337	FISNACHT	3	6	0	0	1	0	None
CGN	cluster_338	FISNACHT	3	3	0	0	1	0	cloud
CGN	cluster_339	FISNACHT	4	8	0	0	1	0	None
CGN	cluster_341	FISNACHT	4	6	0	0	1	0	cloud
CGN	cluster_343	FISNACHT	4	3	0	0	1	0	None
CGN	cluster_350	FISNACHT	4	3	0	0	1	0	shell
CGN	cluster_353	FISNACHT	4	7	0	0	1	0	shell
CGN	cluster_357	FISNACHT	4	6	0	0	1	0	cloud
CGN	cluster_357n	FISNACHT	3	2	0	0	1	0	cloud
CGN	cluster_360	FISNACHT	1	1	0	0	1	0	shell
CGN	cluster_371	FISNACHT	1	4	0	0	1	0	shell
CGN	cluster_372	FISNACHT	1	8	0	0	1	0	shell
CGN	cluster_375	FISNACHT	1	1	0	0	1	0	shell
CGN	cluster_381	FISNACHT	1	8	0	0	1	0	shell
CGN	cluster_394	FISNACHT	2	1	0	0	1	0	cloud
CGN	cluster_396	FISNACHT	2	1	0	0	1	0	cloud
CGN	cluster_397	FISNACHT	2	1	0	0	1	0	shell
CGN	cluster_399	FISNACHT	2	2	0	0	1	0	cloud
CGN	cluster_400	FISNACHT	2	8	0	0	1	0	shell
CGN	cluster_403	FISNACHT	2	1	0	0	1	0	cloud
CGN	cluster_404	FISNACHT	2	7	0.0053	0.0003	0.056	-1.38631	shell
CGN	cluster_406	FISNACHT	2	2	0	0	1	0	cloud
CGN	cluster_407	FISNACHT	2	3	0.0042	0.0021	0.5	-0.993919	cloud
CGN	cluster_411	FISNACHT	2	3	0	0	1	0	shell
CGN	cluster_413	FISNACHT	2	3	0.0004	0.0002	0.5	-1.05221	shell
CGN	cluster_414	FISNACHT	2	1	0	0	1	0	shell
CGN	cluster_416	FISNACHT	2	2	0	0	1	0	cloud
CGN	cluster_418	FISNACHT	2	2	0	0	1	0	None
CGN	cluster_419	FISNACHT	2	1	0	0	1	0	cloud
CGN	cluster_422	FISNACHT	2	1	0.0034	0.0007	0.205	-0.772718	cloud
CGN	cluster_423	FISNACHT	2	1	0.0005	0	0	-1.16221	cloud
CGN	cluster_424	FISNACHT	2	7	0.0014	0.0013	0.928	0.0365605	shell
CGN	cluster_426	FISNACHT	2	2	0.0015	0.0005	0.333	-1.21781	cloud
CGN	cluster_427	FISNACHT	2	1	0	0	1	0	cloud
CGN	cluster_428	FISNACHT	2	1	0	0	1	0	shell
CGN	cluster_429	FISNACHT	2	1	0	0	1	0	cloud
CGN	cluster_431	FISNACHT	2	1	0.0011	0.0001	0.09	-1.49796	None
CGN	cluster_433	FISNACHT	2	2	0.0003	0	0	-1.16221	cloud
CGN	cluster_437	FISNACHT	2	1	0	0	1	0	shell
CGN	cluster_443	FISNACHT	2	1	0	0	1	0	cloud
CGN	cluster_446	FISNACHT	2	1	0	0	1	0	shell
CGN	cluster_464	FISNACHT	3	7	0.0026	0.0026	1	0.0711708	cloud
CGN	cluster_466	FISNACHT	3	6	0	0	1	0	cloud
CGN	cluster_469	FISNACHT	3	2	0	0	1	0	shell
CGN	cluster_483	FISNACHT	3	8	0.0047	0.0036	0.765	-0.62734	core
CGN	cluster_486	FISNACHT	3	8	0.0005	0.0004	0.8	-0.494109	shell
CGN	cluster_488	FISNACHT	3	3	0	0	1	0	cloud
CGN	cluster_490	FISNACHT	3	2	0	0	1	0	shell
CGN	cluster_493	FISNACHT	3	5	0.0018	0.001	0.555	-0.951183	shell
CGN	cluster_496	FISNACHT	3	1	0.0022	0.0004	0.181	-1.26856	shell
CGN	cluster_510	FISNACHT	3	1	0.0028	0.0006	0.214	-0.743951	shell
CGN	cluster_512	FISNACHT	3	2	0.003	0.0028	0.933	2.4582	shell
CGN	cluster_516	FISNACHT	3	1	0	0	1	0	cloud
CGN	cluster_528	FISNACHT	3	5	0.0022	0.0018	0.818	-0.149315	cloud
CGN	cluster_542	FISNACHT	4	1	0	0	1	0	None
CGN	cluster_544	FISNACHT	4	5	0.0014	0.0017	1.214	1.69608	shell
CGN	cluster_558	FISNACHT	1	5	0.0048	0.0011	0.229	-0.42692	core
CGN	cluster_562	FISNACHT	1	4	0.0013	0.0008	0.615	-0.457215	cloud
CGN	cluster_564	FISNACHT	1	1	0	0	1	0	None
CGN	cluster_575	FISNACHT	1	6	0	0	1	0	cloud
CGN	cluster_576	FISNACHT	1	3	0	0	1	0	shell
CGN	cluster_577	FISNACHT	1	7	0	0	1	0	shell
CGN	cluster_579	FISNACHT	1	8	0	0	1	0	shell
CGN	cluster_580	FISNACHT	1	2	0.0037	0.0027	0.729	1.02139	shell
CGN	cluster_587	FISNACHT	2	7	0	0	1	0	shell
CGN	cluster_590	FISNACHT	2	4	0	0	1	0	cloud
CGN	cluster_591	FISNACHT	2	8	0.0027	0.0011	0.407	-2.30746	shell
CGN	cluster_592	FISNACHT	2	3	0	0	1	0	cloud
CGN	cluster_596	FISNACHT	2	3	0.0022	0.0024	1.09	2.11606	cloud
CGN	cluster_601n	FISNACHT	3	8	0	0	1	0	shell
CGN	cluster_605	FISNACHT	2	7	0	0	1	0	shell
CGN	cluster_608	FISNACHT	2	3	0.0052	0.0044	0.846	0.935828	shell
CGN	cluster_612	FISNACHT	2	7	0.0005	0	0	-1.16221	shell
CGN	cluster_613	FISNACHT	2	2	0	0	1	0	cloud
CGN	cluster_617	FISNACHT	2	8	0.0027	0.0048	1.777	3.03492	shell
CGN	cluster_623	FISNACHT	2	8	0	0	1	0	None
CGN	cluster_627	FISNACHT	2	2	0.003	0.0007	0.233	-2.04854	cloud
CGN	cluster_630	FISNACHT	2	3	0.0047	0.0049	1.042	1.77468	cloud
CGN	cluster_632	FISNACHT	2	6	0.0045	0.0051	1.133	1.46606	cloud
CGN	cluster_635	FISNACHT	2	7	0	0	1	0	shell
CGN	cluster_650	FISNACHT	3	3	0	0	1	0	cloud
CGN	cluster_651	FISNACHT	3	8	0	0	1	0	cloud
CGN	cluster_652	FISNACHT	3	8	0	0	1	0	cloud
CGN	cluster_656	FISNACHT	3	8	0.0011	0.0006	0.545	-1.53507	cloud
CGN	cluster_661	FISNACHT	3	8	0	0	1	0	cloud
CGN	cluster_671	FISNACHT	3	8	0	0	1	0	shell
CGN	cluster_677	FISNACHT	3	3	0	0	1	0	None
CGN	cluster_681	FISNACHT	3	8	0.0003	0.0001	0.333	-1.49796	shell
CGN	cluster_684	FISNACHT	3	7	0	0	1	0	cloud
CGN	cluster_687	FISNACHT	3	5	0.0002	0	0	-1.16221	None
CGN	cluster_691	FISNACHT	3	8	0	0	1	0	shell
CGN	cluster_694	FISNACHT	3	8	0	0	1	0	None
CGN	cluster_698	FISNACHT	3	8	0.0065	0.0089	1.369	1.55275	shell
CGN	cluster_727	FISNACHT	3	6	0	0	1	0	shell
CGN	cluster_744	FISNACHT	4	3	0.0034	0.0039	1.147	2.56315	shell
CGN	cluster_745	FISNACHT	4	8	0.0003	0.0001	0.333	-1.4279	None
CGN	cluster_749	FISNACHT	4	1	0	0	1	0	None
CGN	cluster_772	FISNACHT	1	5	0	0	1	0	cloud
CGN	cluster_779	FISNACHT	1	8	0	0	1	0	shell
CGN	cluster_790	FISNACHT	2	8	0	0	1	0	core
CGN	cluster_796	FISNACHT	2	7	0.0003	0.0003	1	0.200738	shell
CGN	cluster_805	FISNACHT	2	6	0	0	1	0	shell
CGN	cluster_806	FISNACHT	2	1	0.013	0.0042	0.323	0.962805	shell
CGN	cluster_807	FISNACHT	2	7	0	0	1	0	cloud
CGN	cluster_809	FISNACHT	2	8	0	0	1	0	None
CGN	cluster_844	FISNACHT	2	8	0.0056	0.0081	1.446	1.73423	core
CGN	cluster_850	FISNACHT	2	6	0.0001	0	0	-1.16221	cloud
CGN	cluster_862	FISNACHT	3	8	0	0	1	0	core
CGN	cluster_868	FISNACHT	3	7	0.0016	0.0015	0.937	0.249504	shell
CGN	cluster_892	FISNACHT	3	8	0	0	1	0	core
CGN	cluster_904	FISNACHT	3	6	0.0013	0.0012	0.923	0.0953865	shell
CGN	cluster_936	FISNACHT	3	8	0	0	1	0	cloud
CGN	cluster_946	FISNACHT	3	7	0	0	1	0	shell
CGN	cluster_949	FISNACHT	4	6	0.0026	0.0033	1.269	2.33296	shell
CGN	cluster_952	FISNACHT	4	8	0.0032	0.0013	0.406	-2.34404	shell
CGN	cluster_954	FISNACHT	4	6	0.002	0.0008	0.4	-2.0042	cloud
CGN	cluster_956	FISNACHT	4	1	0.0124	0.0044	0.354	0.746245	cloud
CGN	cluster_956n	FISNACHT	1	5	0	0	1	0	cloud
CGN	cluster_957	FISNACHT	4	8	0.0035	0.0017	0.485	-2.10274	core
CGN	cluster_961	FISNACHT	4	8	0	0	1	0	cloud
CGN	cluster_962	FISNACHT	4	7	0	0	1	0	cloud
CGN	cluster_976	FISNACHT	1	8	0	0	1	0	core
CGN	cluster_980n	FISNACHT	3	3	0.0004	0.0001	0.25	-1.49796	cloud
CGN	cluster_986	FISNACHT	1	8	0	0	1	0	cloud
CGN	cluster_1009n	FISNACHT	3	3	0	0	1	0	shell
CGN	cluster_1039n	FISNACHT	2	8	0	0	1	0	shell
CGN	cluster_1231n	FISNACHT	3	8	0	0	1	0	cloud
CGN	cluster_1288n	FISNACHT	4	8	0	0	1	0	cloud
CGN	cluster_1367n	FISNACHT	1	8	0	0	1	0	shell
CGN	cluster_1449n	FISNACHT	3	7	0	0	1	0	cloud
CGN	cluster_1488n	FISNACHT	3	1	0	0	1	0	None
CGN	cluster_1849n	FISNACHT	4	1	0	0	1	0	None
CGN	cluster_1855n	FISNACHT	3	5	0	0	1	0	cloud
CGN	cluster_2003	FISNACHT	1	8	0	0	1	0	shell
CGN	cluster_2023	FISNACHT	2	8	0	0	1	0	shell
CGN	cluster_2038	FISNACHT	2	1	0	0	1	0	cloud
CGN	cluster_2049	FISNACHT	2	1	0	0	1	0	shell
CGN	cluster_2067	FISNACHT	2	2	0	0	1	0	shell
CGN	cluster_2069	FISNACHT	2	1	0	0	1	0	shell
CGN	cluster_2070	FISNACHT	2	6	0	0	1	0	shell
CGN	cluster_2076	FISNACHT	2	4	0	0	1	0	shell
CGN	cluster_2085	FISNACHT	2	1	0	0	1	0	shell
CGN	cluster_2173n	FISNACHT	2	5	0	0	1	0	shell
CGN	cluster_2260	FISNACHT	3	1	0	0	1	0	shell
CGN	cluster_2272	FISNACHT	3	8	0	0	1	0	shell
CGN	cluster_2282	FISNACHT	3	1	0	0	1	0	shell
CGN	cluster_2287n	FISNACHT	2	8	0	0	1	0	shell
CGN	cluster_2311	FISNACHT	4	4	0	0	1	0	shell
CGN	cluster_2315	FISNACHT	4	8	0	0	1	0	core
CGN	cluster_2354	FISNACHT	1	2	0	0	1	0	shell
CGN	cluster_2356	FISNACHT	1	8	0	0	1	0	core
CGN	cluster_2392	FISNACHT	1	1	0	0	1	0	shell
CGN	cluster_2434	FISNACHT	2	1	0	0	1	0	shell
CGN	cluster_2445n	FISNACHT	3	7	0	0	1	0	cloud
CGN	cluster_2546	FISNACHT	3	5	0	0	1	0	shell
CGN	cluster_2551	FISNACHT	3	2	0	0	1	0	shell
CGN	cluster_2572	FISNACHT	3	2	0	0	1	0	shell
CGN	cluster_2628	FISNACHT	3	3	0	0	1	0	shell
CGN	cluster_2631	FISNACHT	3	3	0	0	1	0	shell
CGN	cluster_2815	FISNACHT	2	7	0	0	1	0	shell
CGN	cluster_2844n	FISNACHT	4	1	0	0	1	0	None
CGN	cluster_2878n	FISNACHT	3	8	0	0	1	0	shell
CGN	cluster_2886	FISNACHT	2	1	0	0	1	0	shell
CGN	cluster_2922	FISNACHT	3	4	0	0	1	0	cloud
CGN	cluster_2944n	FISNACHT	3	6	0	0	1	0	shell
CGN	cluster_3041n	FISNACHT	3	6	0	0	1	0	shell
CGN	cluster_3100	FISNACHT	2	1	0	0	1	0	cloud
CGN	cluster_3152	FISNACHT	2	2	0	0	1	0	core
CGN	cluster_3183	FISNACHT	2	1	0	0	1	0	shell
CGN	cluster_3548	FISNACHT	3	2	0	0	1	0	shell
CGN	cluster_3690	FISNACHT	4	5	0	0	1	0	shell
CGN	cluster_3728	FISNACHT	1	4	0	0	1	0	shell
CGN	cluster_3865	FISNACHT	3	1	0	0	1	0	shell
CGN	cluster_3931	FISNACHT	1	5	0	0	1	0	shell
CGN	cluster_3950	FISNACHT	2	1	0	0	1	0	cloud
CGN	cluster_4061	FISNACHT	3	4	0.0041	0.0044	1.073	1.43465	shell
CGN	cluster_4078	FISNACHT	3	4	0.007	0.0098	1.4	3.18628	shell
CGN	cluster_4185	FISNACHT	2	1	0	0	1	0	shell
CGN	cluster_4285	FISNACHT	3	6	0.0037	0.0053	1.432	2.27122	shell
CGN	cluster_4457	FISNACHT	2	8	0	0	1	0	shell
CGN	cluster_4530n	FISNACHT	4	8	0	0	1	0	shell
CGN	cluster_4642	FISNACHT	1	1	0	0	1	0	shell
CGN	cluster_4651n	FISNACHT	multiple	4	0	0	1	0	core
CGN	cluster_4835	FISNACHT	3	3	0	0	1	0	shell
CGN	cluster_4864	FISNACHT	1	6	0	0	1	0	shell
CGN	cluster_4882	FISNACHT	2	1	0.0011	0.0002	0.181	-0.57783	shell
CGN	cluster_4986	FISNACHT	3	6	0	0	1	0	cloud
CGN	cluster_5322	FISNACHT	3	8	0.0088	0.0112	1.272	2.12348	shell
CGN	cluster_5391	FISNACHT	multiple	7	0.0039	0.0028	0.717	-0.981117	shell
CGN	cluster_5401	FISNACHT	multiple	3	0	0	1	0	shell
CGN	cluster_5411	FISNACHT	2	1	0	0	1	0	cloud
CGN	cluster_5416	FISNACHT	2	1	0.0022	0.0003	0.136	-1.54972	cloud
CGN	cluster_5465	FISNACHT	3	7	0.0037	0.0034	0.918	2.17278	core
CGN	cluster_5543	FISNACHT	1	3	0	0	1	0	shell
CGN	cluster_5558	FISNACHT	1	1	0	0	1	0	cloud
CGN	cluster_5571	FISNACHT	1	1	0	0	1	0	shell
CGN	cluster_5579	FISNACHT	2	3	0.0027	0.0031	1.148	2.42603	shell
CGN	cluster_5581	FISNACHT	2	2	0	0	1	0	shell
CGN	cluster_5622	FISNACHT	2	1	0.0124	0.0029	0.233	-0.914895	shell
CGN	cluster_5624	FISNACHT	2	1	0	0	1	0	shell
CGN	cluster_5649	FISNACHT	3	6	0	0	1	0	shell
CGN	cluster_5723	FISNACHT	4	1	0	0	1	0	shell
CGN	cluster_5725	FISNACHT	4	1	0	0	1	0	shell
CGN	cluster_5728	FISNACHT	4	7	0.0083	0.0028	0.337	0.087362	shell
CGN	cluster_5775	FISNACHT	1	7	0	0	1	0	shell
CGN	cluster_5880	FISNACHT	3	3	0	0	1	0	shell
CGN	cluster_5920	FISNACHT	3	7	0.0048	0.0001	0.02	-1.49796	cloud
CGN	cluster_6040	FISNACHT	2	3	0.0077	0.006	0.779	0.538383	shell
CGN	cluster_6072	FISNACHT	3	6	0	0	1	0	core
CGN	cluster_6077	FISNACHT	3	2	0	0	1	0	shell
CGN	cluster_6212	FISNACHT	2	1	0	0	1	0	shell
CGN	cluster_6215	FISNACHT	3	7	0.0105	0.016	1.523	2.63425	shell
CGN	cluster_6216	FISNACHT	3	5	0.0084	0.0046	0.547	-0.347148	core
CGN	cluster_6225	FISNACHT	3	8	0	0	1	0	shell
CGN	cluster_6226	FISNACHT	3	1	0	0	1	0	shell
CGN	cluster_6268	FISNACHT	1	7	0	0	1	0	shell
CGN	cluster_6303	FISNACHT	2	1	0	0	1	0	core
CGN	cluster_6316	FISNACHT	2	1	0.0005	0	0	-1.16221	None
CGN	cluster_6319	FISNACHT	2	2	0	0	1	0	cloud
CGN	cluster_6339	FISNACHT	2	1	0.0153	0.0036	0.235	-0.910408	shell
CGN	cluster_6347	FISNACHT	2	1	0.0107	0.0024	0.224	-0.979982	shell
CGN	cluster_6351	FISNACHT	3	2	0	0	1	0	shell
CGN	cluster_6390	FISNACHT	3	8	0	0	1	0	shell
CGN	cluster_6399	FISNACHT	3	5	0.002	0.0014	0.7	-0.704278	shell
CGN	cluster_6502	FISNACHT	3	7	0.011	0.0143	1.3	1.6998	shell
CGN	cluster_6504	FISNACHT	3	8	0	0	1	0	core
CGN	cluster_6507	FISNACHT	3	1	0.0113	0.0019	0.168	-1.77568	shell
CGN	cluster_6509	FISNACHT	3	7	0	0	1	0	core
CGN	cluster_6517	FISNACHT	3	1	0.0034	0.0004	0.117	-2.00318	shell
CGN	cluster_6531	FISNACHT	3	1	0.0068	0.003	0.441	1.7669	shell
CGN	cluster_6540	FISNACHT	3	8	0	0	1	0	core
CGN	cluster_6561	FISNACHT	4	4	0.0039	0.0048	1.23	2.2249	shell
CGN	cluster_6564	FISNACHT	4	7	0.0033	0	0	0	shell
CGN	cluster_6599	FISNACHT	2	2	0.0102	0.006	0.588	0.257293	shell
CGN	cluster_6609	FISNACHT	2	2	0.003	0.0027	0.9	2.33444	shell
CGN	cluster_6611	FISNACHT	2	1	0	0	1	0	cloud
CGN	cluster_6619	FISNACHT	2	5	0	0	1	0	shell
CGN	cluster_6642	FISNACHT	3	8	0	0	1	0	shell
CGN	cluster_6643	FISNACHT	3	1	0	0	1	0	shell
CGN	cluster_6648	FISNACHT	3	1	0	0	1	0	cloud
CGN	cluster_6658	FISNACHT	3	1	0	0	1	0	core
CGN	cluster_6662	FISNACHT	3	6	0.003	0.0035	1.166	1.17115	shell
CGN	cluster_6663	FISNACHT	3	1	0.0238	0.0077	0.323	0.207556	shell
CGN	cluster_6669	FISNACHT	3	5	0.0022	0.0019	0.863	0.00501938	cloud
CGN	cluster_6676	FISNACHT	3	8	0.0025	0.0031	1.24	1.13948	shell
CGN	cluster_6689	FISNACHT	4	8	0.007	0.0001	0.014	-0.448318	core
CGN	cluster_6694	FISNACHT	1	1	0.0164	0.004	0.243	-0.833311	shell
CGN	cluster_6705	FISNACHT	1	1	0	0	1	0	shell
CGN	cluster_6712	FISNACHT	1	2	0.0167	0.0101	0.604	0.67885	shell
CGN	cluster_6716	FISNACHT	1	4	0	0	1	0	cloud
CGN	cluster_6717	FISNACHT	1	2	0	0	1	0	shell
CGN	cluster_6718	FISNACHT	multiple	8	0.0029	0.0045	1.551	2.76663	shell
CGN	cluster_6743	FISNACHT	2	1	0.0017	0.0002	0.117	-1.34917	shell
CGN	cluster_6744	FISNACHT	2	8	0.0015	0.0003	0.2	-1.89253	shell
CGN	cluster_6767	FISNACHT	multiple	5	0	0	1	0	core
CGN	cluster_6769	FISNACHT	3	2	0	0	1	0	shell
CGN	cluster_6780	FISNACHT	3	7	0	0	1	0	shell
CGN	cluster_6784	FISNACHT	3	1	0	0	1	0	shell
CGN	cluster_6803	FISNACHT	3	8	0	0	1	0	core
CGN	cluster_6815	FISNACHT	4	5	0.0018	0.0022	1.222	1.72065	shell
CGN	cluster_6816	FISNACHT	4	1	0	0	1	0	shell
CGN	cluster_6889	FISNACHT	2	8	0.0046	0.0042	0.913	0.936921	cloud
CGN	cluster_6902	FISNACHT	3	5	0.0094	0.0099	1.053	2.27372	shell
CGN	cluster_6921	FISNACHT	3	7	0.0039	0.0026	0.666	2.7254	shell
CGN	cluster_6981	FISNACHT	1	1	0.0022	0.0004	0.181	-0.987408	shell
CGN	cluster_6997	FISNACHT	2	1	0.0068	0.0015	0.22	-0.976783	shell
CGN	cluster_7134	FISNACHT	2	2	0.0136	0.0059	0.433	-0.880089	shell
CGN	cluster_7138	FISNACHT	2	8	0.0099	0.0035	0.353	1.77728	shell
CGN	cluster_7199	FISNACHT	3	5	0.0026	0.0035	1.346	2.20442	shell
CGN	cluster_7202	FISNACHT	3	8	0.0015	0.0004	0.266	-1.12379	shell
CGN	cluster_7241	FISNACHT	1	8	0.0025	0.0002	0.08	0.966291	core
CGN	cluster_7242	FISNACHT	1	8	0	0	1	0	core
CGN	cluster_7243	FISNACHT	1	2	0	0	1	0	shell
CGN	cluster_7245	FISNACHT	1	7	0.0033	0.0025	0.757	-0.904202	core
CGN	cluster_7246	FISNACHT	1	1	0	0	1	0	shell
CGN	cluster_7250	FISNACHT	1	1	0	0	1	0	shell
CGN	cluster_7251	FISNACHT	1	1	0	0	1	0	cloud
CGN	cluster_7260	FISNACHT	1	3	0	0	1	0	core
CGN	cluster_7261	FISNACHT	1	3	0.0012	0.0007	0.583	-0.438953	shell
CGN	cluster_7262	FISNACHT	1	3	0	0	1	0	shell
CGN	cluster_7268	FISNACHT	1	2	0	0	1	0	shell
CGN	cluster_7280	FISNACHT	1	6	0	0	1	0	cloud
CGN	cluster_7281	FISNACHT	1	8	0.0011	0.0004	0.363	-2.00318	core
CGN	cluster_7283	FISNACHT	1	2	0.0027	0.0016	0.592	0.28803	shell
CGN	cluster_7292	FISNACHT	1	1	0	0	1	0	shell
CGN	cluster_7307	FISNACHT	2	7	0	0	1	0	shell
CGN	cluster_7329	FISNACHT	2	7	0	0	1	0	core
CGN	cluster_7332	FISNACHT	2	7	0	0	1	0	shell
CGN	cluster_7333	FISNACHT	2	2	0.0049	0.0037	0.755	1.47056	shell
CGN	cluster_7338	FISNACHT	2	8	0.0071	0.006	0.845	-0.462062	shell
CGN	cluster_7344	FISNACHT	2	8	0.0006	0	0	-1.16221	shell
CGN	cluster_7377	FISNACHT	2	8	0	0	1	0	shell
CGN	cluster_7385	FISNACHT	2	5	0	0	1	0	core
CGN	cluster_7397	FISNACHT	2	2	0	0	1	0	core
CGN	cluster_7398	FISNACHT	2	1	0.0187	0.0037	0.197	-0.0644558	shell
CGN	cluster_7415	FISNACHT	2	5	0	0	1	0	shell
CGN	cluster_7420	FISNACHT	2	1	0.0164	0.006	0.365	0.898864	cloud
CGN	cluster_7421	FISNACHT	2	1	0	0	1	0	shell
CGN	cluster_7434	FISNACHT	3	3	0.0114	0.0096	0.842	1.46811	core
CGN	cluster_7436	FISNACHT	3	8	0	0	1	0	core
CGN	cluster_7438	FISNACHT	3	6	0	0	1	0	core
CGN	cluster_7442	FISNACHT	3	6	0.0028	0.0031	1.107	2.01216	shell
CGN	cluster_7446	FISNACHT	3	8	0.0025	0.0023	0.92	0.906493	shell
CGN	cluster_7448	FISNACHT	3	1	0.0227	0.0077	0.339	0.716386	shell
CGN	cluster_7457	FISNACHT	3	3	0	0	1	0	core
CGN	cluster_7458	FISNACHT	3	1	0.0079	0.0018	0.227	-0.877879	shell
CGN	cluster_7463	FISNACHT	3	2	0.0071	0.0049	0.69	1.0175	shell
CGN	cluster_7487	FISNACHT	3	3	0.0029	0.0029	1	1.48999	cloud
CGN	cluster_7488	FISNACHT	3	2	0	0	1	0	shell
CGN	cluster_7497	FISNACHT	3	8	0.0017	0.0012	0.705	-1.11007	core
CGN	cluster_7505	FISNACHT	3	4	0	0	1	0	shell
CGN	cluster_7515	FISNACHT	3	6	0.0018	0.0022	1.222	1.01915	shell
CGN	cluster_7518	FISNACHT	3	8	0.0085	0.009	1.058	1.4207	core
CGN	cluster_7526	FISNACHT	3	3	0	0	1	0	shell
CGN	cluster_7531	FISNACHT	3	1	0.0136	0.0031	0.227	-0.992043	shell
CGN	cluster_7580	FISNACHT	3	5	0	0	1	0	shell
CGN	cluster_7585	FISNACHT	3	8	0	0	1	0	shell
CGN	cluster_7629	FISNACHT	4	3	0	0	1	0	shell
CGN	cluster_7634	FISNACHT	4	8	0.0037	0.0012	0.324	-1.84598	shell
CGN	cluster_7639	FISNACHT	4	2	0	0	1	0	cloud
CGN	cluster_7640	FISNACHT	4	8	0.0053	0.0031	0.584	-0.0162678	shell
CGN	cluster_7644	FISNACHT	4	2	0	0	1	0	shell
CGN	cluster_7645	FISNACHT	4	8	0.0023	0.0019	0.826	-0.799624	core
CGN	cluster_7688	FISNACHT	1	1	0.0017	0.0003	0.176	-1.0018	cloud
CGN	cluster_7708	FISNACHT	2	3	0	0	1	0	shell
CGN	cluster_7718	FISNACHT	2	2	0.0003	0.0002	0.666	0.649981	shell
CGN	cluster_7749	FISNACHT	2	6	0	0	1	0	cloud
CGN	cluster_7772	FISNACHT	2	1	0.0136	0.002	0.147	-2.00512	shell
CGN	cluster_7776	FISNACHT	3	1	0	0	1	0	cloud
CGN	cluster_7804	FISNACHT	3	1	0.0085	0.0019	0.223	-0.884329	shell
CGN	cluster_7806	FISNACHT	3	8	0.0066	0.0085	1.287	2.76506	shell
CGN	cluster_7851	FISNACHT	4	2	0.0052	0.0029	0.557	0.0140201	shell
CGN	cluster_7897	FISNACHT	2	1	0.0141	0.0031	0.219	-1.0409	shell
CGN	cluster_7941	FISNACHT	4	5	0.0086	0.0053	0.616	2.08645	core
CGN	cluster_7942	FISNACHT	4	1	0	0	1	0	core
CGN	cluster_8002	FISNACHT	3	2	0	0	1	0	shell
CGN	cluster_8012	FISNACHT	3	6	0.0018	0.0024	1.333	1.61277	shell
CGN	cluster_8026	FISNACHT	4	5	0.0018	0.0021	1.166	1.38474	cloud
CGN	cluster_8076	FISNACHT	3	1	0.0096	0.0033	0.343	0.482583	cloud
CGN	cluster_8089	FISNACHT	3	2	0.0049	0.0032	0.653	0.557328	cloud
CGN	cluster_8313n	FISNACHT	3	8	0	0	1	0	cloud
CGN	cluster_8394	FISNACHT	2	8	0.0123	0.0083	0.674	-0.210525	shell
CGN	cluster_8395	FISNACHT	2	1	0	0	1	0	cloud
CGN	cluster_8481	FISNACHT	4	1	0.0034	0.0007	0.205	-1.03914	shell
CGN	cluster_8487	FISNACHT	4	8	0	0	1	0	core
CGN	cluster_8491n	FISNACHT	2	8	0.001	0.0007	0.7	-0.772718	cloud
CGN	cluster_8513	FISNACHT	1	4	0.0037	0.0023	0.621	-0.824313	shell
CGN	cluster_8518	FISNACHT	1	2	0.0006	0.0001	0.166	-1.49796	core
CGN	cluster_8536	FISNACHT	2	3	0	0	1	0	cloud
CGN	cluster_8591	FISNACHT	1	4	0	0	1	0	shell
CGN	cluster_8603	FISNACHT	1	3	0	0	1	0	shell
CGN	cluster_8622n	FISNACHT	4	1	0.0068	0.0008	0.117	-2.23554	shell
CGN	cluster_8669	FISNACHT	3	8	0.0065	0.0001	0.015	-0.448318	cloud
CGN	cluster_8688n	FISNACHT	3	6	0	0	1	0	shell
CGN	cluster_8746	FISNACHT	1	1	0	0	1	0	core
CGN	cluster_8760	FISNACHT	2	3	0.0022	0.0025	1.136	2.42073	cloud
CGN	cluster_9044n	FISNACHT	2	7	0	0	1	0	cloud
CGN	cluster_9163	FISNACHT	4	1	0.0198	0.0046	0.232	-0.941627	shell
CGN	cluster_9267	FISNACHT	2	7	0.006	0.0049	0.816	-0.598115	shell
CGN	cluster_9360n	FISNACHT	2	8	0	0	1	0	cloud
CGN	cluster_9395	FISNACHT	3	2	0.0061	0.0037	0.606	0.314105	shell
CGN	cluster_9429	FISNACHT	4	5	0.0064	0.0088	1.375	2.575	cloud
CGN	cluster_9526	FISNACHT	2	6	0.0077	0.0093	1.207	1.39516	cloud
CGN	cluster_9615	FISNACHT	3	1	0.0136	0.0046	0.338	0.508791	shell
CGN	cluster_9899	FISNACHT	1	8	0	0	1	0	core
CGN	cluster_10885n	FISNACHT	2	8	0	0	1	0	cloud
CGN	cluster_11049n	FISNACHT	2	1	0	0	1	0	cloud
CGN	cluster_11343n	FISNACHT	3	8	0	0	1	0	cloud
CGN	cluster_12665n	FISNACHT	3	5	0	0	1	0	shell
CGN	cluster_14232n	FISNACHT	2	5	0	0	1	0	cloud
CGN	cluster_14521n	FISNACHT	3	1	0	0	1	0	shell
CGN	cluster_15456n	FISNACHT	2	2	0	0	1	0	cloud
CGN	cluster_15796n	FISNACHT	1	3	0	0	1	0	shell
CGN	cluster_16163n	FISNACHT	3	8	0	0	1	0	shell
CGN	cluster_16200n	FISNACHT	1	7	0	0	1	0	cloud
CGN	cluster_16261n	FISNACHT	3	7	0	0	1	0	shell
CGN	cluster_16657n	FISNACHT	2	8	0	0	1	0	shell
CGN	cluster_16803n	FISNACHT	3	2	0	0	1	0	cloud
CGN	cluster_17119n	FISNACHT	2	4	0	0	1	0	shell
CGN	cluster_17318n	FISNACHT	2	1	0	0	1	0	cloud
CGN	cluster_19392n	FISNACHT	4	1	0	0	1	0	cloud
CGN	cluster_19499n	FISNACHT	3	6	0	0	1	0	shell
CGN	cluster_19600n	FISNACHT	2	1	0	0	1	0	shell
CGN	cluster_20405n	FISNACHT	2	2	0	0	1	0	cloud
CGN	cluster_22565n	FISNACHT	4	8	0	0	1	0	shell
CGN	cluster_23097n	FISNACHT	1	3	0	0	1	0	shell
CGN	cluster_23332n	FISNACHT	3	8	0	0	1	0	cloud
CGN	cluster_25120n	FISNACHT	4	6	0	0	1	0	core
CGN	cluster_25253nn	FISNACHT	3	1	0	0	1	0	cloud
CGN	cluster_25517n	FISNACHT	3	8	0	0	1	0	core
CGN	cluster_25831n	FISNACHT	3	6	0	0	1	0	shell
CGN	cluster_25957n	FISNACHT	4	7	0	0	1	0	shell
CGN	cluster_27052n	FISNACHT	3	4	0	0	1	0	shell
CGN	cluster_29278n	FISNACHT	3	1	0	0	1	0	shell
CGN	cluster_29552n	FISNACHT	4	8	0	0	1	0	shell
CGN	cluster_30010n	FISNACHT	1	1	0	0	1	0	shell
CGN	cluster_30760n	FISNACHT	1	1	0	0	1	0	shell
CGN	cluster_31045n	FISNACHT	3	6	0	0	1	0	shell
CGN	cluster_31171n	FISNACHT	2	1	0	0	1	0	shell
CGN	cluster_32187nn	FISNACHT	4	1	0	0	1	0	cloud
CGN	cluster_32425n	FISNACHT	2	1	0	0	1	0	core
CGN	cluster_32817n	FISNACHT	4	3	0	0	1	0	shell
CGN	cluster_32974n	FISNACHT	2	1	0	0	1	0	shell
CGN	cluster_33121n	FISNACHT	4	7	0	0	1	0	shell
CGN	cluster_34099n	FISNACHT	3	5	0	0	1	0	shell
CGN	cluster_34245n	FISNACHT	4	7	0	0	1	0	shell
CGN	cluster_50329n	FISNACHT	2	1	0	0	1	0	cloud
CGN	cluster_52104n	FISNACHT	3	5	0.0006	0.0004	0.666	0.903179	shell
CGN	cluster_56330n	FISNACHT	1	3	0.0012	0.0014	1.166	2.17212	shell
CGN	cluster_65166n	FISNACHT	3	4	0.0028	0.0028	1	1.13415	shell
DP	cluster_5	FISNACHT	1	14	0.0156	0.0143	0.916	-0.0869903	core
DP	cluster_24	FISNACHT	1	14	0	0	1	0	shell
DP	cluster_31	FISNACHT	2	6	0	0	1	0	shell
DP	cluster_34	FISNACHT	2	5	0	0	1	0	shell
DP	cluster_35	FISNACHT	2	13	0	0	1	0	shell
DP	cluster_36	FISNACHT	2	1	0	0	1	0	shell
DP	cluster_37	FISNACHT	2	4	0	0	1	0	cloud
DP	cluster_39	FISNACHT	2	3	0	0	1	0	cloud
DP	cluster_40	FISNACHT	2	1	0	0	1	0	shell
DP	cluster_41	FISNACHT	2	1	0.0119	0.0007	0.058	-2.42842	shell
DP	cluster_42	FISNACHT	2	2	0.0006	0.0002	0.333	-0.245852	shell
DP	cluster_43	FISNACHT	2	1	0.0022	0.0001	0.045	-1.87967	shell
DP	cluster_44	FISNACHT	2	2	0	0	1	0	shell
DP	cluster_48	FISNACHT	2	1	0.0176	0.0038	0.215	-0.281366	cloud
DP	cluster_52	FISNACHT	2	1	0.0011	0	0	-1.48662	shell
DP	cluster_54	FISNACHT	2	2	0.0142	0.0041	0.288	-1.16295	shell
DP	cluster_57	FISNACHT	2	1	0.0204	0.001	0.049	-2.709	cloud
DP	cluster_60	FISNACHT	2	3	0.0049	0.001	0.204	-2.00096	cloud
DP	cluster_62	FISNACHT	2	8	0.0077	0.002	0.259	-2.35308	shell
DP	cluster_66	FISNACHT	2	4	0.0026	0.001	0.384	-0.991583	shell
DP	cluster_68	FISNACHT	2	1	0.0022	0.0001	0.045	-1.86017	cloud
DP	cluster_72	FISNACHT	2	2	0.0077	0.0024	0.311	-0.916783	cloud
DP	cluster_76	FISNACHT	2	3	0.0067	0.0024	0.358	-1.08048	cloud
DP	cluster_78	FISNACHT	2	1	0.0079	0.0007	0.088	-1.84781	shell
DP	cluster_79	FISNACHT	2	1	0.0056	0.0004	0.071	-2.04402	shell
DP	cluster_85	FISNACHT	3	12	0.0071	0.0059	0.83	-0.196791	shell
DP	cluster_86	FISNACHT	3	3	0.0002	0	0	-1.12411	cloud
DP	cluster_93	FISNACHT	3	18	0.0156	0.0155	0.993	0.0979137	core
DP	cluster_96	FISNACHT	3	1	0.0062	0.0003	0.048	-2.38908	cloud
DP	cluster_200	FISNACHT	1	3	0	0	1	0	cloud
DP	cluster_225	FISNACHT	2	11	0	0	1	0	shell
DP	cluster_231	FISNACHT	2	2	0	0	1	0	cloud
DP	cluster_235	FISNACHT	2	1	0	0	1	0	shell
DP	cluster_241	FISNACHT	2	8	0	0	1	0	core
DP	cluster_250	FISNACHT	2	1	0	0	1	0	cloud
DP	cluster_259	FISNACHT	2	8	0	0	1	0	shell
DP	cluster_283	FISNACHT	3	15	0	0	1	0	shell
DP	cluster_285	FISNACHT	3	1	0	0	1	0	shell
DP	cluster_288	FISNACHT	3	1	0	0	1	0	shell
DP	cluster_298	FISNACHT	3	8	0	0	1	0	shell
DP	cluster_315	FISNACHT	3	1	0	0	1	0	cloud
DP	cluster_318	FISNACHT	3	2	0	0	1	0	shell
DP	cluster_325n	FISNACHT	2	3	0	0	1	0	cloud
DP	cluster_332	FISNACHT	3	6	0	0	1	0	shell
DP	cluster_353	FISNACHT	4	14	0	0	1	0	shell
DP	cluster_360	FISNACHT	1	2	0	0	1	0	shell
DP	cluster_371	FISNACHT	1	1	0	0	1	0	shell
DP	cluster_372	FISNACHT	1	1	0	0	1	0	shell
DP	cluster_375	FISNACHT	1	4	0	0	1	0	shell
DP	cluster_380	FISNACHT	1	1	0	0	1	0	shell
DP	cluster_381	FISNACHT	1	5	0	0	1	0	shell
DP	cluster_387	FISNACHT	2	5	0	0	1	0	cloud
DP	cluster_396	FISNACHT	2	1	0	0	1	0	cloud
DP	cluster_399	FISNACHT	2	3	0	0	1	0	cloud
DP	cluster_400	FISNACHT	2	4	0.0173	0.0096	0.554	-0.324901	shell
DP	cluster_404	FISNACHT	2	2	0.008	0.0031	0.387	-0.370729	shell
DP	cluster_406	FISNACHT	2	2	0	0	1	0	cloud
DP	cluster_407	FISNACHT	2	1	0.0039	0.0004	0.102	-1.37113	cloud
DP	cluster_411	FISNACHT	2	1	0.0102	0.0013	0.127	-1.49274	shell
DP	cluster_413	FISNACHT	2	3	0.0171	0.0061	0.356	-1.2269	shell
DP	cluster_414	FISNACHT	2	1	0	0	1	0	shell
DP	cluster_418	FISNACHT	2	3	0.0004	0.0001	0.25	-0.68334	None
DP	cluster_423	FISNACHT	2	5	0.0006	0.0007	1.166	1.84614	cloud
DP	cluster_424	FISNACHT	2	5	0.0048	0.0034	0.708	0.190264	shell
DP	cluster_426	FISNACHT	2	2	0	0	1	0	cloud
DP	cluster_428	FISNACHT	2	10	0.0128	0.0099	0.773	-0.306199	shell
DP	cluster_429	FISNACHT	2	2	0.0003	0	0	-1.12411	cloud
DP	cluster_437	FISNACHT	2	3	0.0087	0.0032	0.367	-1.04899	shell
DP	cluster_446	FISNACHT	2	4	0	0	1	0	shell
DP	cluster_466	FISNACHT	3	1	0.0198	0.0024	0.121	-1.6449	cloud
DP	cluster_483	FISNACHT	3	11	0.0174	0.0085	0.488	-1.64132	core
DP	cluster_486	FISNACHT	3	11	0.0051	0.0034	0.666	-0.74793	shell
DP	cluster_490	FISNACHT	3	1	0	0	1	0	shell
DP	cluster_493	FISNACHT	3	4	0.0074	0.0031	0.418	-1.10449	shell
DP	cluster_496	FISNACHT	3	6	0.0075	0.0032	0.426	-1.38337	shell
DP	cluster_510	FISNACHT	3	2	0.0024	0.0004	0.166	-1.65541	shell
DP	cluster_516	FISNACHT	3	3	0	0	1	0	cloud
DP	cluster_544	FISNACHT	4	4	0.0039	0.0013	0.333	-1.492	shell
DP	cluster_558	FISNACHT	1	6	0.0099	0.0063	0.636	-0.360006	core
DP	cluster_564	FISNACHT	1	1	0.0005	0	0	-1.10856	None
DP	cluster_575	FISNACHT	1	2	0	0	1	0	cloud
DP	cluster_576	FISNACHT	1	5	0.0018	0.001	0.555	-0.38688	shell
DP	cluster_577	FISNACHT	1	9	0	0	1	0	shell
DP	cluster_579	FISNACHT	1	10	0.0014	0.0017	1.214	1.21478	shell
DP	cluster_580	FISNACHT	1	4	0.0063	0.0034	0.539	-0.414227	shell
DP	cluster_587	FISNACHT	2	9	0.0066	0.0055	0.833	0.0393499	shell
DP	cluster_590	FISNACHT	2	4	0.0008	0.0006	0.75	0.57078	cloud
DP	cluster_591	FISNACHT	2	8	0.0037	0.0025	0.675	-0.470212	shell
DP	cluster_601n	FISNACHT	3	1	0.0017	0	0	-1.67393	shell
DP	cluster_605	FISNACHT	2	3	0.0124	0.0024	0.193	-2.28773	shell
DP	cluster_608	FISNACHT	2	6	0.0152	0.0051	0.335	-1.9181	shell
DP	cluster_612	FISNACHT	2	2	0.0108	0.0023	0.212	-1.72613	shell
DP	cluster_617	FISNACHT	2	13	0.0061	0.0056	0.918	0.10077	shell
DP	cluster_632	FISNACHT	2	2	0.0058	0.0018	0.31	-0.932411	cloud
DP	cluster_635	FISNACHT	2	1	0.0028	0.0003	0.107	-1.05964	shell
DP	cluster_650	FISNACHT	3	7	0	0	1	0	cloud
DP	cluster_651	FISNACHT	3	3	0	0	1	0	cloud
DP	cluster_652	FISNACHT	3	4	0.0048	0.0024	0.5	-0.55697	cloud
DP	cluster_656	FISNACHT	3	2	0.0027	0.0005	0.185	-1.59587	cloud
DP	cluster_661	FISNACHT	3	2	0.0043	0.001	0.232	-1.41701	cloud
DP	cluster_666	FISNACHT	3	1	0.0136	0.0027	0.198	-0.530811	shell
DP	cluster_671	FISNACHT	3	6	0	0	1	0	shell
DP	cluster_681	FISNACHT	3	1	0.0085	0.0004	0.047	-2.45552	shell
DP	cluster_691	FISNACHT	3	7	0.0074	0.0047	0.635	-0.522543	shell
DP	cluster_698	FISNACHT	3	19	0.0089	0.0085	0.955	-0.128545	shell
DP	cluster_744	FISNACHT	4	7	0.006	0.007	1.166	2.0774	shell
DP	cluster_772	FISNACHT	1	6	0.0084	0.0027	0.321	-1.91387	cloud
DP	cluster_779	FISNACHT	1	3	0.0032	0.0015	0.468	-0.320583	shell
DP	cluster_790	FISNACHT	2	4	0.0002	0	0	-1.10856	core
DP	cluster_796	FISNACHT	2	7	0.0062	0.0071	1.145	1.65692	shell
DP	cluster_805	FISNACHT	2	1	0.0017	0	0	-1.68285	shell
DP	cluster_806	FISNACHT	2	4	0.0035	0.0013	0.371	-1.26547	shell
DP	cluster_844	FISNACHT	2	16	0.0086	0.0057	0.662	-1.10114	core
DP	cluster_862	FISNACHT	3	13	0.0055	0.0022	0.4	-1.9327	core
DP	cluster_868	FISNACHT	3	2	0.0024	0.0008	0.333	-0.69994	shell
DP	cluster_892	FISNACHT	3	7	0	0	1	0	core
DP	cluster_904	FISNACHT	3	10	0.0067	0.0074	1.104	1.13532	shell
DP	cluster_946	FISNACHT	3	8	0	0	1	0	shell
DP	cluster_952	FISNACHT	4	10	0.0092	0.0086	0.934	0.421774	shell
DP	cluster_956n	FISNACHT	1	1	0.0011	0	0	-1.46605	cloud
DP	cluster_957	FISNACHT	4	5	0.0054	0.0018	0.333	-1.66559	core
DP	cluster_962	FISNACHT	4	2	0.0074	0.0015	0.202	-1.78627	cloud
DP	cluster_976	FISNACHT	1	16	0	0	1	0	core
DP	cluster_986	FISNACHT	1	2	0	0	1	0	cloud
DP	cluster_1009n	FISNACHT	3	1	0	0	1	0	shell
DP	cluster_1039n	FISNACHT	2	7	0	0	1	0	shell
DP	cluster_1367n	FISNACHT	1	14	0	0	1	0	shell
DP	cluster_2003	FISNACHT	1	8	0	0	1	0	shell
DP	cluster_2009	FISNACHT	1	7	0	0	1	0	cloud
DP	cluster_2023	FISNACHT	2	7	0	0	1	0	shell
DP	cluster_2026	FISNACHT	2	5	0	0	1	0	cloud
DP	cluster_2034	FISNACHT	2	9	0	0	1	0	shell
DP	cluster_2035	FISNACHT	2	7	0	0	1	0	shell
DP	cluster_2036	FISNACHT	2	3	0	0	1	0	cloud
DP	cluster_2041	FISNACHT	2	1	0	0	1	0	cloud
DP	cluster_2042	FISNACHT	2	1	0	0	1	0	shell
DP	cluster_2044	FISNACHT	2	2	0	0	1	0	cloud
DP	cluster_2045	FISNACHT	2	1	0	0	1	0	shell
DP	cluster_2049	FISNACHT	2	4	0	0	1	0	shell
DP	cluster_2056	FISNACHT	2	1	0	0	1	0	shell
DP	cluster_2057	FISNACHT	2	1	0	0	1	0	shell
DP	cluster_2067	FISNACHT	2	4	0	0	1	0	shell
DP	cluster_2069	FISNACHT	2	4	0	0	1	0	shell
DP	cluster_2070	FISNACHT	2	4	0	0	1	0	shell
DP	cluster_2076	FISNACHT	2	11	0	0	1	0	shell
DP	cluster_2085	FISNACHT	2	12	0	0	1	0	shell
DP	cluster_2173n	FISNACHT	2	3	0	0	1	0	shell
DP	cluster_2200	FISNACHT	3	1	0	0	1	0	shell
DP	cluster_2203	FISNACHT	3	2	0	0	1	0	shell
DP	cluster_2208	FISNACHT	3	2	0	0	1	0	shell
DP	cluster_2232	FISNACHT	3	7	0	0	1	0	shell
DP	cluster_2239	FISNACHT	3	2	0	0	1	0	cloud
DP	cluster_2255	FISNACHT	3	2	0	0	1	0	cloud
DP	cluster_2272	FISNACHT	3	3	0	0	1	0	shell
DP	cluster_2282	FISNACHT	3	4	0	0	1	0	shell
DP	cluster_2287n	FISNACHT	2	8	0	0	1	0	shell
DP	cluster_2299	FISNACHT	4	5	0	0	1	0	shell
DP	cluster_2304	FISNACHT	4	2	0	0	1	0	cloud
DP	cluster_2311	FISNACHT	4	6	0	0	1	0	shell
DP	cluster_2312	FISNACHT	4	5	0	0	1	0	shell
DP	cluster_2315	FISNACHT	4	17	0	0	1	0	core
DP	cluster_2324	FISNACHT	4	1	0	0	1	0	shell
DP	cluster_2333	FISNACHT	4	10	0	0	1	0	shell
DP	cluster_2335	FISNACHT	4	1	0	0	1	0	shell
DP	cluster_2354	FISNACHT	1	2	0	0	1	0	shell
DP	cluster_2356	FISNACHT	1	18	0	0	1	0	core
DP	cluster_2370	FISNACHT	1	1	0	0	1	0	shell
DP	cluster_2391	FISNACHT	1	4	0	0	1	0	shell
DP	cluster_2400	FISNACHT	1	12	0	0	1	0	shell
DP	cluster_2401	FISNACHT	1	3	0	0	1	0	cloud
DP	cluster_2405	FISNACHT	1	6	0	0	1	0	cloud
DP	cluster_2411	FISNACHT	2	2	0	0	1	0	cloud
DP	cluster_2413	FISNACHT	2	8	0	0	1	0	shell
DP	cluster_2426	FISNACHT	2	7	0	0	1	0	shell
DP	cluster_2443	FISNACHT	2	2	0	0	1	0	shell
DP	cluster_2445	FISNACHT	2	1	0	0	1	0	shell
DP	cluster_2445n	FISNACHT	3	1	0	0	1	0	cloud
DP	cluster_2466	FISNACHT	2	1	0	0	1	0	cloud
DP	cluster_2471	FISNACHT	2	6	0	0	1	0	cloud
DP	cluster_2486	FISNACHT	2	3	0	0	1	0	cloud
DP	cluster_2504	FISNACHT	2	1	0	0	1	0	cloud
DP	cluster_2530	FISNACHT	2	7	0	0	1	0	shell
DP	cluster_2531	FISNACHT	3	1	0	0	1	0	cloud
DP	cluster_2546	FISNACHT	3	11	0	0	1	0	shell
DP	cluster_2547	FISNACHT	3	4	0	0	1	0	shell
DP	cluster_2551	FISNACHT	3	1	0	0	1	0	shell
DP	cluster_2566	FISNACHT	3	1	0	0	1	0	cloud
DP	cluster_2572	FISNACHT	3	2	0	0	1	0	shell
DP	cluster_2584	FISNACHT	3	1	0	0	1	0	shell
DP	cluster_2627	FISNACHT	3	6	0	0	1	0	shell
DP	cluster_2628	FISNACHT	3	6	0	0	1	0	shell
DP	cluster_2630	FISNACHT	3	1	0	0	1	0	cloud
DP	cluster_2631	FISNACHT	3	3	0	0	1	0	shell
DP	cluster_2636	FISNACHT	3	1	0	0	1	0	shell
DP	cluster_2655	FISNACHT	3	1	0	0	1	0	cloud
DP	cluster_2673	FISNACHT	3	2	0	0	1	0	shell
DP	cluster_2815	FISNACHT	2	3	0	0	1	0	shell
DP	cluster_2833	FISNACHT	2	2	0	0	1	0	shell
DP	cluster_2886	FISNACHT	2	8	0	0	1	0	shell
DP	cluster_2922	FISNACHT	3	6	0	0	1	0	cloud
DP	cluster_2934	FISNACHT	3	5	0	0	1	0	shell
DP	cluster_2944n	FISNACHT	3	2	0	0	1	0	shell
DP	cluster_2992	FISNACHT	3	1	0	0	1	0	shell
DP	cluster_3041n	FISNACHT	3	1	0	0	1	0	shell
DP	cluster_3125	FISNACHT	2	1	0	0	1	0	shell
DP	cluster_3152	FISNACHT	2	10	0	0	1	0	core
DP	cluster_3177	FISNACHT	2	2	0	0	1	0	cloud
DP	cluster_3183	FISNACHT	2	5	0	0	1	0	shell
DP	cluster_3338	FISNACHT	1	5	0	0	1	0	cloud
DP	cluster_3347	FISNACHT	1	2	0	0	1	0	shell
DP	cluster_3350	FISNACHT	1	2	0	0	1	0	shell
DP	cluster_3371	FISNACHT	1	3	0	0	1	0	shell
DP	cluster_3382	FISNACHT	1	2	0	0	1	0	shell
DP	cluster_3428	FISNACHT	2	1	0	0	1	0	shell
DP	cluster_3429	FISNACHT	2	3	0	0	1	0	shell
DP	cluster_3455	FISNACHT	2	1	0	0	1	0	cloud
DP	cluster_3478	FISNACHT	2	2	0	0	1	0	shell
DP	cluster_3536	FISNACHT	3	3	0	0	1	0	cloud
DP	cluster_3605	FISNACHT	3	7	0	0	1	0	cloud
DP	cluster_3633	FISNACHT	3	1	0	0	1	0	shell
DP	cluster_3662	FISNACHT	4	8	0	0	1	0	shell
DP	cluster_3690	FISNACHT	4	2	0	0	1	0	shell
DP	cluster_3704	FISNACHT	1	3	0	0	1	0	shell
DP	cluster_3725	FISNACHT	1	1	0	0	1	0	shell
DP	cluster_3728	FISNACHT	1	11	0	0	1	0	shell
DP	cluster_3751	FISNACHT	2	12	0	0	1	0	shell
DP	cluster_3795	FISNACHT	2	9	0	0	1	0	shell
DP	cluster_3810	FISNACHT	3	2	0	0	1	0	shell
DP	cluster_3860	FISNACHT	3	1	0	0	1	0	shell
DP	cluster_3865	FISNACHT	3	1	0	0	1	0	shell
DP	cluster_3931	FISNACHT	1	6	0	0	1	0	shell
DP	cluster_3981	FISNACHT	2	4	0	0	1	0	cloud
DP	cluster_4001	FISNACHT	2	2	0	0	1	0	shell
DP	cluster_4007	FISNACHT	2	2	0.0021	0.0009	0.428	-0.1007	cloud
DP	cluster_4013	FISNACHT	2	1	0.0232	0.0028	0.12	-1.76484	shell
DP	cluster_4015	FISNACHT	2	1	0	0	1	0	shell
DP	cluster_4038	FISNACHT	3	2	0.0024	0.0013	0.541	0.766959	shell
DP	cluster_4048	FISNACHT	3	1	0.0045	0.0002	0.044	-2.24559	shell
DP	cluster_4078	FISNACHT	3	1	0.0193	0.0018	0.093	-2.02814	shell
DP	cluster_4127	FISNACHT	1	2	0.0024	0.0005	0.208	-1.32641	cloud
DP	cluster_4163	FISNACHT	1	2	0.0139	0.003	0.215	-1.74295	shell
DP	cluster_4197	FISNACHT	2	1	0	0	1	0	cloud
DP	cluster_4198	FISNACHT	2	1	0.0079	0.0011	0.139	-1.2767	cloud
DP	cluster_4202	FISNACHT	2	1	0.0005	0	0	-1.10856	cloud
DP	cluster_4285	FISNACHT	3	2	0.0012	0.0002	0.166	-1.44075	shell
DP	cluster_4293	FISNACHT	3	1	0.0164	0.003	0.182	-0.699149	cloud
DP	cluster_4377	FISNACHT	1	3	0.0034	0.0021	0.617	0.518783	shell
DP	cluster_4399	FISNACHT	1	2	0	0	1	0	shell
DP	cluster_4408	FISNACHT	2	2	0	0	1	0	cloud
DP	cluster_4457	FISNACHT	2	6	0	0	1	0	shell
DP	cluster_4466	FISNACHT	2	4	0.0105	0.0083	0.79	1.01573	shell
DP	cluster_4494n	FISNACHT	1	1	0.0153	0.0012	0.078	-2.22922	shell
DP	cluster_4530n	FISNACHT	4	1	0	0	1	0	shell
DP	cluster_4626	FISNACHT	1	4	0	0	1	0	shell
DP	cluster_4642	FISNACHT	1	4	0	0	1	0	shell
DP	cluster_4651n	FISNACHT	multiple	8	0	0	1	0	core
DP	cluster_4658	FISNACHT	2	2	0	0	1	0	shell
DP	cluster_4833	FISNACHT	3	1	0.0062	0.0007	0.112	-1.46992	cloud
DP	cluster_4859	FISNACHT	1	1	0.0005	0	0	-1.12411	cloud
DP	cluster_4864	FISNACHT	1	4	0	0	1	0	shell
DP	cluster_4872	FISNACHT	2	2	0.0003	0	0	-1.12411	cloud
DP	cluster_4882	FISNACHT	2	9	0.0049	0.0026	0.53	-1.2068	shell
DP	cluster_4932	FISNACHT	2	5	0	0	1	0	shell
DP	cluster_4951	FISNACHT	3	1	0.0005	0	0	-1.12411	cloud
DP	cluster_5068n	FISNACHT	3	2	0	0	1	0	shell
DP	cluster_5182	FISNACHT	2	4	0.0008	0.0003	0.375	-0.839415	cloud
DP	cluster_5237	FISNACHT	3	2	0.0006	0.0001	0.166	-0.487842	shell
DP	cluster_5249	FISNACHT	3	4	0.0013	0.0003	0.23	-1.54421	cloud
DP	cluster_5292	FISNACHT	3	3	0.0067	0.0027	0.402	-0.856393	cloud
DP	cluster_5312	FISNACHT	3	1	0.0028	0.0002	0.071	-1.67399	cloud
DP	cluster_5322	FISNACHT	3	4	0.0109	0.0072	0.66	0.305757	shell
DP	cluster_5341n	FISNACHT	2	2	0.0009	0	0	-1.69247	shell
DP	cluster_5369	FISNACHT	4	3	0	0	1	0	cloud
DP	cluster_5391	FISNACHT	multiple	1	0.0386	0.0029	0.075	-2.47518	shell
DP	cluster_5401	FISNACHT	multiple	2	0	0	1	0	shell
DP	cluster_5410	FISNACHT	2	1	0.0124	0.0011	0.088	-2.02993	shell
DP	cluster_5413	FISNACHT	2	1	0	0	1	0	shell
DP	cluster_5416	FISNACHT	2	9	0.0011	0.0005	0.454	-1.06854	cloud
DP	cluster_5444	FISNACHT	2	5	0.0108	0.007	0.648	-0.0972523	shell
DP	cluster_5451	FISNACHT	2	6	0.0071	0.0018	0.253	-2.23251	cloud
DP	cluster_5456	FISNACHT	2	4	0.0035	0.002	0.571	-0.185646	shell
DP	cluster_5465	FISNACHT	3	16	0.0043	0.0029	0.674	-0.999868	core
DP	cluster_5469	FISNACHT	3	7	0	0	1	0	shell
DP	cluster_5499	FISNACHT	3	1	0.013	0.0028	0.215	-0.318704	shell
DP	cluster_5525	FISNACHT	4	1	0	0	1	0	shell
DP	cluster_5528	FISNACHT	4	1	0	0	1	0	cloud
DP	cluster_5534	FISNACHT	4	1	0	0	1	0	shell
DP	cluster_5537	FISNACHT	4	4	0	0	1	0	shell
DP	cluster_5543	FISNACHT	1	7	0	0	1	0	shell
DP	cluster_5557	FISNACHT	1	6	0.0033	0.004	1.212	2.23495	shell
DP	cluster_5561	FISNACHT	1	2	0	0	1	0	shell
DP	cluster_5562	FISNACHT	1	1	0	0	1	0	shell
DP	cluster_5572	FISNACHT	2	1	0	0	1	0	shell
DP	cluster_5579	FISNACHT	2	6	0.0031	0.0023	0.741	0.0978911	shell
DP	cluster_5580	FISNACHT	2	3	0.0136	0.0044	0.323	-1.39536	shell
DP	cluster_5581	FISNACHT	2	8	0.0017	0.0011	0.647	-0.345818	shell
DP	cluster_5582	FISNACHT	2	6	0.0026	0.002	0.769	0.385473	shell
DP	cluster_5590	FISNACHT	2	1	0.017	0.0021	0.123	-1.60739	shell
DP	cluster_5598	FISNACHT	2	5	0.005	0.0049	0.98	1.63828	cloud
DP	cluster_5606	FISNACHT	2	1	0	0	1	0	shell
DP	cluster_5615	FISNACHT	2	1	0	0	1	0	shell
DP	cluster_5622	FISNACHT	2	10	0.0067	0.0069	1.029	0.859754	shell
DP	cluster_5624	FISNACHT	2	14	0	0	1	0	shell
DP	cluster_5626	FISNACHT	2	7	0	0	1	0	core
DP	cluster_5644	FISNACHT	3	1	0	0	1	0	shell
DP	cluster_5649	FISNACHT	3	9	0	0	1	0	shell
DP	cluster_5659	FISNACHT	3	1	0.0096	0.0008	0.083	-2.12923	cloud
DP	cluster_5674	FISNACHT	3	2	0.0037	0.0004	0.108	-2.23938	shell
DP	cluster_5685	FISNACHT	3	8	0.0017	0.0015	0.882	0.532976	shell
DP	cluster_5687	FISNACHT	3	1	0	0	1	0	cloud
DP	cluster_5702	FISNACHT	3	1	0.0045	0.0006	0.133	-1.06339	shell
DP	cluster_5723	FISNACHT	4	1	0	0	1	0	shell
DP	cluster_5725	FISNACHT	4	1	0	0	1	0	shell
DP	cluster_5728	FISNACHT	4	6	0.0116	0.009	0.775	0.255087	shell
DP	cluster_5753	FISNACHT	1	3	0	0	1	0	shell
DP	cluster_5775	FISNACHT	1	1	0	0	1	0	shell
DP	cluster_5777	FISNACHT	2	1	0	0	1	0	cloud
DP	cluster_5787	FISNACHT	2	1	0	0	1	0	shell
DP	cluster_5792	FISNACHT	2	4	0.0116	0.0061	0.525	-0.504794	shell
DP	cluster_5812	FISNACHT	2	5	0.0092	0.0051	0.554	-0.572553	shell
DP	cluster_5815	FISNACHT	2	4	0.0037	0.0009	0.243	-1.94052	shell
DP	cluster_5847	FISNACHT	3	1	0.0136	0.001	0.073	-2.32538	shell
DP	cluster_5880	FISNACHT	3	3	0	0	1	0	shell
DP	cluster_5904	FISNACHT	3	3	0.0042	0.0018	0.428	-0.670224	shell
DP	cluster_5914	FISNACHT	3	1	0	0	1	0	shell
DP	cluster_5928	FISNACHT	4	2	0.0049	0.0031	0.632	1.48157	shell
DP	cluster_5958	FISNACHT	1	3	0.0007	0.0003	0.428	-0.368271	cloud
DP	cluster_5960	FISNACHT	1	1	0	0	1	0	shell
DP	cluster_6004	FISNACHT	2	3	0.0022	0.0004	0.181	-1.82333	cloud
DP	cluster_6008	FISNACHT	2	1	0.0045	0.0002	0.044	-2.18731	cloud
DP	cluster_6024	FISNACHT	2	1	0	0	1	0	cloud
DP	cluster_6040	FISNACHT	2	2	0.0061	0.003	0.491	0.516253	shell
DP	cluster_6043	FISNACHT	2	14	0	0	1	0	shell
DP	cluster_6050	FISNACHT	2	11	0	0	1	0	shell
DP	cluster_6066	FISNACHT	3	5	0.0016	0.0007	0.437	-0.767094	shell
DP	cluster_6072	FISNACHT	3	4	0	0	1	0	core
DP	cluster_6073	FISNACHT	3	3	0.0049	0.0019	0.387	-0.854111	shell
DP	cluster_6140	FISNACHT	4	1	0	0	1	0	shell
DP	cluster_6147	FISNACHT	4	1	0.0113	0.0006	0.053	-2.47054	cloud
DP	cluster_6163	FISNACHT	1	5	0.0008	0.0001	0.125	-1.59249	None
DP	cluster_6171	FISNACHT	1	1	0	0	1	0	None
DP	cluster_6172	FISNACHT	1	14	0.0145	0.0094	0.648	-1.10201	shell
DP	cluster_6185	FISNACHT	1	4	0	0	1	0	cloud
DP	cluster_6191	FISNACHT	2	3	0	0	1	0	cloud
DP	cluster_6192	FISNACHT	2	10	0.0019	0.0006	0.315	-1.85015	shell
DP	cluster_6194	FISNACHT	2	2	0	0	1	0	cloud
DP	cluster_6195	FISNACHT	2	10	0.0038	0.0016	0.421	-1.65529	shell
DP	cluster_6196	FISNACHT	2	8	0.002	0.0004	0.2	-2.19878	shell
DP	cluster_6198	FISNACHT	2	3	0	0	1	0	None
DP	cluster_6210	FISNACHT	2	13	0.0034	0.0041	1.205	1.1201	cloud
DP	cluster_6212	FISNACHT	2	2	0.0061	0.0025	0.409	-0.14924	shell
DP	cluster_6213	FISNACHT	2	6	0.0024	0.0004	0.166	-2.37388	cloud
DP	cluster_6214	FISNACHT	2	9	0.0018	0.0014	0.777	-0.101032	cloud
DP	cluster_6215	FISNACHT	3	17	0.0031	0.0019	0.612	-1.19212	shell
DP	cluster_6216	FISNACHT	3	16	0.0098	0.0107	1.091	0.497773	core
DP	cluster_6220	FISNACHT	3	7	0.0064	0.0036	0.562	-0.908494	shell
DP	cluster_6225	FISNACHT	3	19	0	0	1	0	shell
DP	cluster_6226	FISNACHT	3	9	0	0	1	0	shell
DP	cluster_6227	FISNACHT	3	6	0.0062	0.0026	0.419	-1.39436	cloud
DP	cluster_6228	FISNACHT	3	9	0.0069	0.0056	0.811	0.019399	shell
DP	cluster_6231	FISNACHT	3	6	0.0024	0.0014	0.583	-0.533009	cloud
DP	cluster_6234	FISNACHT	3	2	0	0	1	0	shell
DP	cluster_6236	FISNACHT	3	1	0	0	1	0	shell
DP	cluster_6262	FISNACHT	4	2	0.0099	0.0013	0.131	-2.42635	shell
DP	cluster_6266	FISNACHT	1	5	0.0006	0.0001	0.166	-1.56169	cloud
DP	cluster_6268	FISNACHT	1	6	0	0	1	0	shell
DP	cluster_6273	FISNACHT	1	15	0	0	1	0	shell
DP	cluster_6280	FISNACHT	1	6	0.0013	0.0004	0.307	-1.44347	shell
DP	cluster_6282	FISNACHT	1	8	0.0082	0.0037	0.451	-1.47271	shell
DP	cluster_6284	FISNACHT	1	6	0.002	0.0004	0.2	-2.006	cloud
DP	cluster_6286	FISNACHT	multiple	1	0	0	1	0	None
DP	cluster_6287	FISNACHT	1	2	0	0	1	0	shell
DP	cluster_6290	FISNACHT	1	1	0	0	1	0	shell
DP	cluster_6296	FISNACHT	1	7	0	0	1	0	shell
DP	cluster_6300	FISNACHT	2	6	0.0048	0.0017	0.354	-1.63869	shell
DP	cluster_6303	FISNACHT	2	8	0.0001	0.0001	1	-0.306583	core
DP	cluster_6307	FISNACHT	2	1	0	0	1	0	None
DP	cluster_6308	FISNACHT	2	2	0	0	1	0	cloud
DP	cluster_6310	FISNACHT	2	3	0	0	1	0	shell
DP	cluster_6311	FISNACHT	2	3	0	0	1	0	core
DP	cluster_6313	FISNACHT	2	2	0	0	1	0	None
DP	cluster_6316	FISNACHT	2	2	0	0	1	0	None
DP	cluster_6317	FISNACHT	2	6	0.0052	0.0012	0.23	-2.27987	cloud
DP	cluster_6318	FISNACHT	2	1	0	0	1	0	cloud
DP	cluster_6319	FISNACHT	2	2	0.0003	0	0	-1.10856	cloud
DP	cluster_6321	FISNACHT	2	5	0.0032	0.0009	0.281	-1.7391	shell
DP	cluster_6322	FISNACHT	2	1	0	0	1	0	cloud
DP	cluster_6324	FISNACHT	2	2	0	0	1	0	cloud
DP	cluster_6325	FISNACHT	2	1	0	0	1	0	None
DP	cluster_6328	FISNACHT	2	10	0.0009	0.0005	0.555	-0.859423	shell
DP	cluster_6329	FISNACHT	2	3	0	0	1	0	cloud
DP	cluster_6331	FISNACHT	2	7	0	0	1	0	shell
DP	cluster_6332	FISNACHT	2	8	0.0006	0.0004	0.666	-0.30776	shell
DP	cluster_6334	FISNACHT	2	1	0.0039	0.0008	0.205	-0.372787	None
DP	cluster_6339	FISNACHT	2	4	0.0102	0.0048	0.47	-0.866336	shell
DP	cluster_6341	FISNACHT	2	9	0	0	1	0	shell
DP	cluster_6342	FISNACHT	multiple	3	0.0014	0.0003	0.214	-1.66488	shell
DP	cluster_6343	FISNACHT	2	2	0.0009	0	0	-1.69247	shell
DP	cluster_6345	FISNACHT	2	1	0	0	1	0	None
DP	cluster_6347	FISNACHT	2	8	0.0032	0.0019	0.593	-0.775376	shell
DP	cluster_6351	FISNACHT	3	16	0	0	1	0	shell
DP	cluster_6352	FISNACHT	3	2	0	0	1	0	shell
DP	cluster_6355	FISNACHT	3	3	0.0014	0.0009	0.642	0.392578	shell
DP	cluster_6357	FISNACHT	3	1	0	0	1	0	cloud
DP	cluster_6358	FISNACHT	3	3	0	0	1	0	None
DP	cluster_6359	FISNACHT	3	2	0	0	1	0	None
DP	cluster_6360	FISNACHT	3	3	0	0	1	0	cloud
DP	cluster_6368	FISNACHT	3	4	0.0045	0.0011	0.244	-1.98053	cloud
DP	cluster_6369	FISNACHT	3	3	0.0019	0.0002	0.105	-2.09133	shell
DP	cluster_6371	FISNACHT	3	4	0	0	1	0	cloud
DP	cluster_6373	FISNACHT	3	10	0	0	1	0	core
DP	cluster_6374	FISNACHT	3	11	0.0026	0.0021	0.807	-0.12396	cloud
DP	cluster_6375	FISNACHT	3	1	0.0073	0.0004	0.054	-2.37805	None
DP	cluster_6376	FISNACHT	3	5	0	0	1	0	cloud
DP	cluster_6377	FISNACHT	3	1	0	0	1	0	cloud
DP	cluster_6379	FISNACHT	3	10	0	0	1	0	shell
DP	cluster_6381	FISNACHT	3	2	0	0	1	0	shell
DP	cluster_6382	FISNACHT	3	1	0	0	1	0	cloud
DP	cluster_6390	FISNACHT	3	7	0	0	1	0	shell
DP	cluster_6391	FISNACHT	3	1	0	0	1	0	cloud
DP	cluster_6393	FISNACHT	3	5	0.0012	0.0002	0.166	-1.99669	shell
DP	cluster_6394	FISNACHT	3	2	0.0049	0.0011	0.224	-1.52432	shell
DP	cluster_6397	FISNACHT	3	7	0.0037	0.0009	0.243	-2.17397	cloud
DP	cluster_6399	FISNACHT	3	3	0.0009	0.0002	0.222	-1.2654	shell
DP	cluster_6500	FISNACHT	2	15	0.0057	0.0051	0.894	-0.211529	shell
DP	cluster_6502	FISNACHT	3	15	0.0103	0.011	1.067	0.369955	shell
DP	cluster_6503	FISNACHT	3	3	0.0029	0.0005	0.172	-2.01983	shell
DP	cluster_6504	FISNACHT	3	17	0	0	1	0	core
DP	cluster_6507	FISNACHT	3	14	0.0084	0.0071	0.845	-0.317012	shell
DP	cluster_6509	FISNACHT	3	20	0	0	1	0	core
DP	cluster_6510	FISNACHT	3	2	0	0	1	0	cloud
DP	cluster_6513	FISNACHT	3	1	0	0	1	0	shell
DP	cluster_6514	FISNACHT	3	1	0	0	1	0	cloud
DP	cluster_6515	FISNACHT	3	15	0.005	0.0018	0.36	-2.07977	shell
DP	cluster_6516	FISNACHT	3	3	0.0002	0	0	-1.10856	cloud
DP	cluster_6517	FISNACHT	3	15	0.0038	0.0036	0.947	-0.248212	shell
DP	cluster_6522	FISNACHT	3	5	0.0038	0.002	0.526	-0.636661	cloud
DP	cluster_6525	FISNACHT	3	11	0	0	1	0	cloud
DP	cluster_6531	FISNACHT	3	6	0.0065	0.0046	0.707	-0.0681624	shell
DP	cluster_6535	FISNACHT	3	5	0	0	1	0	shell
DP	cluster_6540	FISNACHT	3	11	0	0	1	0	core
DP	cluster_6541	FISNACHT	3	6	0.0018	0.0004	0.222	-1.93397	cloud
DP	cluster_6542	FISNACHT	3	2	0	0	1	0	None
DP	cluster_6544	FISNACHT	3	2	0.0086	0.0032	0.372	-0.507835	cloud
DP	cluster_6549	FISNACHT	3	2	0	0	1	0	None
DP	cluster_6561	FISNACHT	4	14	0.0014	0.0003	0.214	-2.14096	shell
DP	cluster_6563	FISNACHT	4	6	0.0001	0	0	-0.563519	cloud
DP	cluster_6564	FISNACHT	4	2	0.008	0.0019	0.237	-1.47432	shell
DP	cluster_6565	FISNACHT	4	7	0	0	1	0	shell
DP	cluster_6566	FISNACHT	4	2	0	0	1	0	cloud
DP	cluster_6567	FISNACHT	4	4	0	0	1	0	cloud
DP	cluster_6575	FISNACHT	1	4	0.01	0.0058	0.58	-0.349868	shell
DP	cluster_6576	FISNACHT	1	1	0	0	1	0	cloud
DP	cluster_6578	FISNACHT	multiple	4	0.0021	0.0006	0.285	-1.42859	cloud
DP	cluster_6591	FISNACHT	multiple	2	0.0003	0	0	-1.10856	cloud
DP	cluster_6598	FISNACHT	2	2	0	0	1	0	cloud
DP	cluster_6599	FISNACHT	2	12	0.0077	0.0033	0.428	-1.84192	shell
DP	cluster_6600	FISNACHT	2	6	0	0	1	0	cloud
DP	cluster_6602	FISNACHT	2	6	0	0	1	0	shell
DP	cluster_6604	FISNACHT	2	1	0.0022	0.0001	0.045	-1.87317	None
DP	cluster_6605	FISNACHT	2	3	0	0	1	0	cloud
DP	cluster_6609	FISNACHT	2	5	0.0054	0.0029	0.537	-0.671672	shell
DP	cluster_6611	FISNACHT	2	5	0	0	1	0	cloud
DP	cluster_6612	FISNACHT	2	7	0.0021	0.0005	0.238	-2.07747	shell
DP	cluster_6617	FISNACHT	2	6	0	0	1	0	shell
DP	cluster_6619	FISNACHT	2	5	0	0	1	0	shell
DP	cluster_6642	FISNACHT	3	5	0	0	1	0	shell
DP	cluster_6643	FISNACHT	3	8	0	0	1	0	shell
DP	cluster_6647	FISNACHT	3	1	0	0	1	0	None
DP	cluster_6648	FISNACHT	3	6	0	0	1	0	cloud
DP	cluster_6656	FISNACHT	3	6	0.0063	0.0035	0.555	-0.783479	shell
DP	cluster_6658	FISNACHT	3	13	0	0	1	0	core
DP	cluster_6662	FISNACHT	3	2	0.0021	0.0002	0.095	-1.97512	shell
DP	cluster_6663	FISNACHT	3	6	0.011	0.0079	0.718	-0.124547	shell
DP	cluster_6666	FISNACHT	3	1	0	0	1	0	None
DP	cluster_6667	FISNACHT	3	6	0.0067	0.0015	0.223	-2.38328	shell
DP	cluster_6669	FISNACHT	3	3	0.0052	0.0019	0.365	-0.977401	cloud
DP	cluster_6670	FISNACHT	3	4	0.0039	0.0013	0.333	-1.41816	shell
DP	cluster_6672	FISNACHT	3	1	0.0056	0.0003	0.053	-2.2929	shell
DP	cluster_6674	FISNACHT	3	4	0	0	1	0	shell
DP	cluster_6676	FISNACHT	3	13	0.005	0.0032	0.64	-1.03268	shell
DP	cluster_6679	FISNACHT	3	3	0.0022	0.0003	0.136	-1.97328	None
DP	cluster_6680	FISNACHT	3	1	0.0056	0.0005	0.089	-1.77584	cloud
DP	cluster_6682	FISNACHT	4	7	0	0	1	0	cloud
DP	cluster_6685	FISNACHT	4	10	0	0	1	0	shell
DP	cluster_6689	FISNACHT	4	18	0.0093	0.0115	1.236	0.946386	core
DP	cluster_6690	FISNACHT	4	2	0.0043	0.0007	0.162	-1.97188	cloud
DP	cluster_6693	FISNACHT	4	3	0.0146	0.0038	0.26	-1.87936	cloud
DP	cluster_6694	FISNACHT	1	5	0.0128	0.0047	0.367	-1.65227	shell
DP	cluster_6695	FISNACHT	1	7	0	0	1	0	core
DP	cluster_6696	FISNACHT	1	9	0.0011	0.0005	0.454	-1.13526	cloud
DP	cluster_6698	FISNACHT	1	4	0.0083	0.0051	0.614	-0.00205524	shell
DP	cluster_6699	FISNACHT	1	3	0	0	1	0	cloud
DP	cluster_6700	FISNACHT	1	5	0	0	1	0	shell
DP	cluster_6702	FISNACHT	1	1	0	0	1	0	None
DP	cluster_6705	FISNACHT	1	10	0	0	1	0	shell
DP	cluster_6708	FISNACHT	1	9	0.0132	0.0118	0.893	0.391894	shell
DP	cluster_6709	FISNACHT	1	7	0.0001	0	0	-1.12411	cloud
DP	cluster_6710	FISNACHT	1	1	0	0	1	0	shell
DP	cluster_6712	FISNACHT	1	8	0.0083	0.0054	0.65	-0.604382	shell
DP	cluster_6714	FISNACHT	1	2	0	0	1	0	cloud
DP	cluster_6715	FISNACHT	1	4	0.0006	0.0001	0.166	-1.23193	None
DP	cluster_6716	FISNACHT	1	1	0	0	1	0	cloud
DP	cluster_6717	FISNACHT	1	4	0	0	1	0	shell
DP	cluster_6718	FISNACHT	multiple	10	0.006	0.0036	0.6	-0.97399	shell
DP	cluster_6719	FISNACHT	1	6	0.0005	0.0003	0.6	-0.46807	cloud
DP	cluster_6721	FISNACHT	2	1	0	0	1	0	cloud
DP	cluster_6723	FISNACHT	2	5	0	0	1	0	shell
DP	cluster_6726	FISNACHT	2	8	0	0	1	0	core
DP	cluster_6730	FISNACHT	2	4	0	0	1	0	shell
DP	cluster_6735	FISNACHT	2	3	0	0	1	0	cloud
DP	cluster_6737	FISNACHT	2	4	0.0004	0.0001	0.25	-0.745248	cloud
DP	cluster_6738	FISNACHT	2	4	0	0	1	0	shell
DP	cluster_6739	FISNACHT	2	3	0	0	1	0	cloud
DP	cluster_6740	FISNACHT	2	2	0	0	1	0	None
DP	cluster_6743	FISNACHT	2	4	0.0087	0.0026	0.298	-1.80389	shell
DP	cluster_6744	FISNACHT	2	7	0.001	0.0002	0.2	-1.87314	shell
DP	cluster_6745	FISNACHT	2	1	0	0	1	0	shell
DP	cluster_6749	FISNACHT	2	4	0	0	1	0	core
DP	cluster_6750	FISNACHT	2	3	0	0	1	0	cloud
DP	cluster_6753	FISNACHT	2	4	0.0002	0	0	-1.12411	cloud
DP	cluster_6755	FISNACHT	multiple	5	0.0088	0.0031	0.352	-1.6417	shell
DP	cluster_6756	FISNACHT	2	3	0.0004	0	0	-1.46605	None
DP	cluster_6760	FISNACHT	multiple	4	0.0028	0.0015	0.535	-0.276867	shell
DP	cluster_6767	FISNACHT	multiple	16	0.0038	0.0024	0.631	-1.06112	core
DP	cluster_6769	FISNACHT	3	12	0	0	1	0	shell
DP	cluster_6770	FISNACHT	3	9	0.0082	0.0047	0.573	-1.06042	shell
DP	cluster_6778	FISNACHT	3	1	0	0	1	0	None
DP	cluster_6779	FISNACHT	3	5	0.0002	0	0	-0.774124	cloud
DP	cluster_6780	FISNACHT	3	13	0	0	1	0	shell
DP	cluster_6781	FISNACHT	3	1	0	0	1	0	None
DP	cluster_6782	FISNACHT	3	13	0	0	1	0	shell
DP	cluster_6783	FISNACHT	multiple	1	0	0	1	0	cloud
DP	cluster_6784	FISNACHT	3	7	0	0	1	0	shell
DP	cluster_6788	FISNACHT	3	11	0	0	1	0	shell
DP	cluster_6789	FISNACHT	3	1	0	0	1	0	None
DP	cluster_6792	FISNACHT	3	1	0	0	1	0	shell
DP	cluster_6793	FISNACHT	3	7	0	0	1	0	shell
DP	cluster_6794	FISNACHT	3	4	0.0006	0.0002	0.333	-0.941708	shell
DP	cluster_6795	FISNACHT	3	12	0.0074	0.0053	0.716	-0.780026	shell
DP	cluster_6799	FISNACHT	3	4	0	0	1	0	shell
DP	cluster_6803	FISNACHT	3	19	0	0	1	0	core
DP	cluster_6805	FISNACHT	3	2	0.0021	0.0002	0.095	-2.02042	cloud
DP	cluster_6815	FISNACHT	4	13	0.0029	0.0016	0.551	-1.27287	shell
DP	cluster_6816	FISNACHT	4	3	0	0	1	0	shell
DP	cluster_6817	FISNACHT	4	4	0.0035	0.0027	0.771	0.950054	shell
DP	cluster_6818	FISNACHT	4	4	0.0006	0.0002	0.333	-0.884117	cloud
DP	cluster_6827	FISNACHT	1	3	0.0007	0.0001	0.142	-1.423	shell
DP	cluster_6829	FISNACHT	1	7	0	0	1	0	shell
DP	cluster_6849	FISNACHT	1	8	0.0027	0.0007	0.259	-2.08361	shell
DP	cluster_6855	FISNACHT	2	2	0	0	1	0	cloud
DP	cluster_6860	FISNACHT	2	3	0.0029	0.0007	0.241	-1.56848	cloud
DP	cluster_6863	FISNACHT	2	4	0.0048	0.0032	0.666	0.266985	None
DP	cluster_6866	FISNACHT	2	2	0.003	0.0003	0.1	-2.09341	None
DP	cluster_6867	FISNACHT	2	1	0	0	1	0	cloud
DP	cluster_6870	FISNACHT	2	1	0	0	1	0	None
DP	cluster_6874	FISNACHT	2	8	0	0	1	0	shell
DP	cluster_6876	FISNACHT	2	1	0	0	1	0	None
DP	cluster_6882	FISNACHT	2	4	0.0056	0.0019	0.339	-1.47777	cloud
DP	cluster_6889	FISNACHT	2	6	0.0001	0	0	-1.10856	cloud
DP	cluster_6900	FISNACHT	3	2	0.0055	0.0008	0.145	-2.0547	cloud
DP	cluster_6901	FISNACHT	3	2	0	0	1	0	cloud
DP	cluster_6902	FISNACHT	3	7	0.0028	0.0006	0.214	-2.29899	shell
DP	cluster_6906	FISNACHT	3	1	0	0	1	0	cloud
DP	cluster_6909	FISNACHT	3	9	0.0046	0.0033	0.717	-0.360996	shell
DP	cluster_6912n	FISNACHT	4	2	0.0065	0.0015	0.23	-1.45702	shell
DP	cluster_6920	FISNACHT	3	2	0.0021	0.0002	0.095	-2.07722	cloud
DP	cluster_6921	FISNACHT	3	10	0.0065	0.0055	0.846	0.031313	shell
DP	cluster_6935	FISNACHT	3	3	0.0032	0.0004	0.125	-2.31761	cloud
DP	cluster_6942	FISNACHT	3	5	0.005	0.0018	0.36	-1.5814	shell
DP	cluster_6944	FISNACHT	3	2	0.0018	0.0001	0.055	-2.04199	cloud
DP	cluster_6951	FISNACHT	4	2	0	0	1	0	cloud
DP	cluster_6962	FISNACHT	4	1	0.0051	0.0002	0.039	-2.27257	None
DP	cluster_6974	FISNACHT	1	4	0.003	0.0011	0.366	-1.22578	cloud
DP	cluster_6978	FISNACHT	1	3	0.0002	0	0	-1.12411	cloud
DP	cluster_6981	FISNACHT	1	12	0.0083	0.0091	1.096	0.85557	shell
DP	cluster_6992	FISNACHT	2	10	0	0	1	0	shell
DP	cluster_6993	FISNACHT	2	1	0	0	1	0	cloud
DP	cluster_6997	FISNACHT	2	6	0.0092	0.0044	0.478	-1.12239	shell
DP	cluster_6999	FISNACHT	2	7	0.0001	0	0	-1.09133	shell
DP	cluster_7103	FISNACHT	1	1	0.013	0.0027	0.207	-0.33402	cloud
DP	cluster_7107	FISNACHT	2	3	0.0069	0.003	0.434	-0.61162	shell
DP	cluster_7108	FISNACHT	2	8	0.0013	0.001	0.769	0.0136895	cloud
DP	cluster_7111	FISNACHT	2	4	0.0017	0.0005	0.294	-1.42498	cloud
DP	cluster_7116	FISNACHT	2	3	0.0024	0.0009	0.375	-0.966771	cloud
DP	cluster_7117	FISNACHT	2	4	0	0	1	0	shell
DP	cluster_7122	FISNACHT	2	5	0	0	1	0	shell
DP	cluster_7124	FISNACHT	2	5	0	0	1	0	cloud
DP	cluster_7132	FISNACHT	2	5	0	0	1	0	shell
DP	cluster_7134	FISNACHT	2	7	0.0058	0.002	0.344	-1.86939	shell
DP	cluster_7138	FISNACHT	2	13	0.0117	0.0108	0.923	-0.00094194	shell
DP	cluster_7146	FISNACHT	2	2	0.012	0.0022	0.183	-2.01678	shell
DP	cluster_7149	FISNACHT	2	4	0	0	1	0	cloud
DP	cluster_7156	FISNACHT	2	7	0.0046	0.0049	1.065	1.40432	shell
DP	cluster_7170	FISNACHT	3	1	0	0	1	0	cloud
DP	cluster_7174	FISNACHT	3	10	0	0	1	0	cloud
DP	cluster_7194	FISNACHT	3	7	0.0021	0.0004	0.19	-2.249	shell
DP	cluster_7199	FISNACHT	3	2	0.0021	0.0004	0.19	-1.46598	shell
DP	cluster_7202	FISNACHT	3	3	0	0	1	0	shell
DP	cluster_7204	FISNACHT	3	3	0.0007	0.0001	0.142	-1.54315	cloud
DP	cluster_7208	FISNACHT	3	12	0.0006	0.0003	0.5	-1.02567	cloud
DP	cluster_7217	FISNACHT	3	2	0.0009	0.0005	0.555	0.873196	cloud
DP	cluster_7222	FISNACHT	3	5	0.0074	0.0043	0.581	-0.508961	shell
DP	cluster_7225	FISNACHT	4	3	0.0069	0.001	0.144	-2.49137	cloud
DP	cluster_7241	FISNACHT	1	14	0.004	0.0039	0.975	0.184998	core
DP	cluster_7242	FISNACHT	1	20	0	0	1	0	core
DP	cluster_7243	FISNACHT	1	3	0	0	1	0	shell
DP	cluster_7245	FISNACHT	1	20	0.0104	0.0077	0.74	-0.485865	core
DP	cluster_7246	FISNACHT	1	4	0	0	1	0	shell
DP	cluster_7247	FISNACHT	1	5	0.0052	0.0024	0.461	-1.04486	shell
DP	cluster_7248	FISNACHT	1	4	0.0006	0.0001	0.166	-1.35999	shell
DP	cluster_7250	FISNACHT	1	15	0	0	1	0	shell
DP	cluster_7251	FISNACHT	1	2	0	0	1	0	cloud
DP	cluster_7256	FISNACHT	1	11	0.0051	0.0038	0.745	-0.478511	shell
DP	cluster_7257	FISNACHT	1	1	0	0	1	0	shell
DP	cluster_7258	FISNACHT	1	8	0	0	1	0	shell
DP	cluster_7259	FISNACHT	1	6	0.0097	0.0033	0.34	-1.83076	shell
DP	cluster_7260	FISNACHT	1	11	0	0	1	0	core
DP	cluster_7261	FISNACHT	1	3	0.0022	0.0015	0.681	0.774678	shell
DP	cluster_7262	FISNACHT	1	10	0	0	1	0	shell
DP	cluster_7268	FISNACHT	1	9	0	0	1	0	shell
DP	cluster_7269	FISNACHT	1	5	0.0044	0.0008	0.181	-2.39738	shell
DP	cluster_7273	FISNACHT	1	2	0	0	1	0	shell
DP	cluster_7279	FISNACHT	1	14	0.0032	0.0052	1.625	2.53699	shell
DP	cluster_7280	FISNACHT	1	2	0	0	1	0	cloud
DP	cluster_7281	FISNACHT	1	19	0.0029	0.0037	1.275	0.849062	core
DP	cluster_7282	FISNACHT	1	3	0	0	1	0	shell
DP	cluster_7283	FISNACHT	1	7	0.0051	0.0016	0.313	-1.99917	shell
DP	cluster_7288	FISNACHT	1	13	0.0044	0.002	0.454	-1.75427	shell
DP	cluster_7289	FISNACHT	1	13	0.0215	0.018	0.837	-0.410199	shell
DP	cluster_7291	FISNACHT	1	7	0	0	1	0	cloud
DP	cluster_7292	FISNACHT	1	13	0	0	1	0	shell
DP	cluster_7297	FISNACHT	2	9	0.0024	0.0005	0.208	-2.26111	cloud
DP	cluster_7298	FISNACHT	multiple	5	0	0	1	0	shell
DP	cluster_7299	FISNACHT	2	3	0	0	1	0	cloud
DP	cluster_7305	FISNACHT	2	1	0	0	1	0	None
DP	cluster_7307	FISNACHT	2	6	0	0	1	0	shell
DP	cluster_7308	FISNACHT	2	1	0.0176	0.0037	0.21	-0.334964	shell
DP	cluster_7311	FISNACHT	2	6	0	0	1	0	shell
DP	cluster_7312	FISNACHT	2	5	0.0064	0.0028	0.437	-1.15409	shell
DP	cluster_7314	FISNACHT	2	3	0.0124	0.0047	0.379	-1.08771	shell
DP	cluster_7315	FISNACHT	2	2	0	0	1	0	cloud
DP	cluster_7316	FISNACHT	2	4	0	0	1	0	cloud
DP	cluster_7322	FISNACHT	2	7	0	0	1	0	cloud
DP	cluster_7326	FISNACHT	2	3	0	0	1	0	cloud
DP	cluster_7329	FISNACHT	2	15	0.002	0.0005	0.25	-2.16358	core
DP	cluster_7330	FISNACHT	2	10	0	0	1	0	shell
DP	cluster_7331	FISNACHT	2	8	0.0008	0.0001	0.125	-1.99175	cloud
DP	cluster_7332	FISNACHT	2	9	0.0033	0.0017	0.515	-1.18759	shell
DP	cluster_7333	FISNACHT	2	7	0.0037	0.003	0.81	0.233803	shell
DP	cluster_7337	FISNACHT	2	10	0	0	1	0	shell
DP	cluster_7338	FISNACHT	2	9	0.0061	0.0035	0.573	-0.972867	shell
DP	cluster_7339	FISNACHT	2	14	0.0107	0.0069	0.644	-1.12185	shell
DP	cluster_7340	FISNACHT	2	6	0.0028	0.0007	0.25	-1.92742	cloud
DP	cluster_7342	FISNACHT	2	10	0	0	1	0	shell
DP	cluster_7344	FISNACHT	2	16	0.0062	0.0038	0.612	-1.23061	shell
DP	cluster_7347	FISNACHT	2	2	0.0012	0.0001	0.083	-1.63882	cloud
DP	cluster_7348	FISNACHT	2	7	0	0	1	0	shell
DP	cluster_7349	FISNACHT	2	4	0	0	1	0	cloud
DP	cluster_7351	FISNACHT	2	3	0.0059	0.0018	0.305	-1.45989	cloud
DP	cluster_7354	FISNACHT	2	5	0	0	1	0	cloud
DP	cluster_7359	FISNACHT	2	5	0	0	1	0	shell
DP	cluster_7362	FISNACHT	2	2	0.0006	0	0	-1.41789	cloud
DP	cluster_7363	FISNACHT	2	4	0	0	1	0	cloud
DP	cluster_7365	FISNACHT	2	5	0	0	1	0	cloud
DP	cluster_7367	FISNACHT	2	1	0.0039	0.0003	0.076	-1.78212	cloud
DP	cluster_7373	FISNACHT	2	4	0.0076	0.0017	0.223	-2.18351	cloud
DP	cluster_7374	FISNACHT	2	6	0	0	1	0	cloud
DP	cluster_7375	FISNACHT	2	3	0	0	1	0	cloud
DP	cluster_7376	FISNACHT	2	10	0	0	1	0	shell
DP	cluster_7377	FISNACHT	2	10	0	0	1	0	shell
DP	cluster_7382	FISNACHT	2	10	0.0041	0.0039	0.951	0.446124	shell
DP	cluster_7384	FISNACHT	2	2	0	0	1	0	cloud
DP	cluster_7385	FISNACHT	2	14	0	0	1	0	core
DP	cluster_7388	FISNACHT	2	1	0	0	1	0	cloud
DP	cluster_7391	FISNACHT	2	1	0	0	1	0	cloud
DP	cluster_7394	FISNACHT	2	3	0	0	1	0	cloud
DP	cluster_7395	FISNACHT	2	1	0.0028	0.0001	0.035	-1.95116	cloud
DP	cluster_7397	FISNACHT	2	9	0	0	1	0	core
DP	cluster_7398	FISNACHT	2	9	0.0067	0.006	0.895	0.360671	shell
DP	cluster_7399	FISNACHT	2	7	0	0	1	0	cloud
DP	cluster_7411	FISNACHT	2	3	0.0037	0.0011	0.297	-1.33075	shell
DP	cluster_7415	FISNACHT	2	4	0	0	1	0	shell
DP	cluster_7418	FISNACHT	2	15	0.0038	0.004	1.052	0.412448	shell
DP	cluster_7420	FISNACHT	2	3	0.0057	0.0019	0.333	-1.26427	cloud
DP	cluster_7421	FISNACHT	2	15	0	0	1	0	shell
DP	cluster_7423	FISNACHT	2	12	0	0	1	0	cloud
DP	cluster_7433	FISNACHT	3	11	0	0	1	0	cloud
DP	cluster_7434	FISNACHT	3	18	0.0072	0.0087	1.208	0.745489	core
DP	cluster_7436	FISNACHT	3	17	0	0	1	0	core
DP	cluster_7438	FISNACHT	3	16	0	0	1	0	core
DP	cluster_7440	FISNACHT	3	5	0.0024	0.0008	0.333	-1.41259	shell
DP	cluster_7442	FISNACHT	3	14	0.0037	0.0022	0.594	-1.18289	shell
DP	cluster_7446	FISNACHT	3	13	0.0029	0.0032	1.103	0.751293	shell
DP	cluster_7448	FISNACHT	3	4	0.012	0.0059	0.491	-0.793255	shell
DP	cluster_7452	FISNACHT	3	10	0.0012	0.0007	0.583	-0.92486	cloud
DP	cluster_7455	FISNACHT	3	16	0.0015	0.001	0.666	-0.84164	shell
DP	cluster_7457	FISNACHT	3	5	0	0	1	0	core
DP	cluster_7458	FISNACHT	3	10	0.0073	0.0039	0.534	-1.2764	shell
DP	cluster_7463	FISNACHT	3	10	0.0048	0.0027	0.562	-1.09544	shell
DP	cluster_7464	FISNACHT	3	6	0	0	1	0	shell
DP	cluster_7467	FISNACHT	3	9	0	0	1	0	cloud
DP	cluster_7470	FISNACHT	3	8	0	0	1	0	cloud
DP	cluster_7472	FISNACHT	3	20	0.0033	0.0033	1	-0.0384864	shell
DP	cluster_7474	FISNACHT	3	7	0.0019	0.0008	0.421	-1.29405	shell
DP	cluster_7477	FISNACHT	3	2	0.0046	0.0004	0.086	-2.39567	shell
DP	cluster_7479	FISNACHT	3	1	0	0	1	0	cloud
DP	cluster_7486	FISNACHT	3	5	0.0046	0.003	0.652	0.0540693	cloud
DP	cluster_7487	FISNACHT	3	5	0.0008	0.0002	0.25	-1.05279	cloud
DP	cluster_7488	FISNACHT	3	6	0	0	1	0	shell
DP	cluster_7491	FISNACHT	3	4	0	0	1	0	shell
DP	cluster_7497	FISNACHT	3	12	0.008	0	0	-0.94834	core
DP	cluster_7505	FISNACHT	3	13	0	0	1	0	shell
DP	cluster_7506	FISNACHT	3	3	0	0	1	0	cloud
DP	cluster_7508	FISNACHT	3	8	0	0	1	0	shell
DP	cluster_7511	FISNACHT	3	6	0.0048	0.0021	0.437	-1.31755	cloud
DP	cluster_7515	FISNACHT	3	15	0.0074	0.0056	0.756	-0.744665	shell
DP	cluster_7518	FISNACHT	3	15	0.0124	0.0099	0.798	-0.645083	core
DP	cluster_7520	FISNACHT	3	3	0.0062	0.001	0.161	-2.35625	cloud
DP	cluster_7522	FISNACHT	3	4	0	0	1	0	shell
DP	cluster_7526	FISNACHT	3	5	0	0	1	0	shell
DP	cluster_7531	FISNACHT	3	3	0.0096	0.0053	0.552	0.0930531	shell
DP	cluster_7534	FISNACHT	3	7	0.0046	0.002	0.434	-1.41094	shell
DP	cluster_7536	FISNACHT	3	1	0.0102	0.0006	0.058	-2.35133	cloud
DP	cluster_7539	FISNACHT	3	4	0.0087	0.0028	0.321	-1.67772	shell
DP	cluster_7551	FISNACHT	3	12	0.0025	0.0012	0.48	-1.42443	cloud
DP	cluster_7553	FISNACHT	3	6	0.0022	0.0009	0.409	-1.2925	cloud
DP	cluster_7554	FISNACHT	3	3	0.0009	0.0002	0.222	-1.08358	cloud
DP	cluster_7556	FISNACHT	3	4	0.0028	0.0005	0.178	-2.09525	shell
DP	cluster_7569	FISNACHT	3	2	0.0058	0.0009	0.155	-2.10846	shell
DP	cluster_7570	FISNACHT	3	10	0.0051	0.0028	0.549	-1.17797	shell
DP	cluster_7576	FISNACHT	3	2	0	0	1	0	cloud
DP	cluster_7580	FISNACHT	3	6	0	0	1	0	shell
DP	cluster_7581	FISNACHT	3	7	0	0	1	0	None
DP	cluster_7583	FISNACHT	3	3	0.0022	0.0005	0.227	-1.51365	cloud
DP	cluster_7584	FISNACHT	3	9	0	0	1	0	cloud
DP	cluster_7585	FISNACHT	3	19	0	0	1	0	shell
DP	cluster_7588	FISNACHT	3	5	0.0126	0.007	0.555	-0.580691	shell
DP	cluster_7589	FISNACHT	3	12	0	0	1	0	shell
DP	cluster_7594	FISNACHT	3	6	0	0	1	0	cloud
DP	cluster_7601	FISNACHT	3	1	0	0	1	0	cloud
DP	cluster_7613	FISNACHT	3	1	0.0028	0.0001	0.035	-1.97572	cloud
DP	cluster_7619	FISNACHT	3	5	0.0068	0.002	0.294	-1.89698	cloud
DP	cluster_7624	FISNACHT	3	9	0	0	1	0	shell
DP	cluster_7625	FISNACHT	3	2	0	0	1	0	cloud
DP	cluster_7629	FISNACHT	4	11	0	0	1	0	shell
DP	cluster_7630	FISNACHT	4	6	0.0016	0.001	0.625	-0.413984	cloud
DP	cluster_7633	FISNACHT	4	6	0	0	1	0	shell
DP	cluster_7634	FISNACHT	4	16	0.0049	0.0051	1.04	0.330193	shell
DP	cluster_7638	FISNACHT	4	1	0	0	1	0	None
DP	cluster_7639	FISNACHT	4	8	0	0	1	0	cloud
DP	cluster_7640	FISNACHT	4	12	0.0053	0.0021	0.396	-1.88687	shell
DP	cluster_7642	FISNACHT	4	3	0.0014	0.0003	0.214	-1.47766	shell
DP	cluster_7644	FISNACHT	4	10	0	0	1	0	shell
DP	cluster_7645	FISNACHT	4	17	0.0043	0.0032	0.744	-0.754994	core
DP	cluster_7649	FISNACHT	4	6	0	0	1	0	cloud
DP	cluster_7665	FISNACHT	4	13	0.0044	0.0025	0.568	-1.24036	shell
DP	cluster_7670	FISNACHT	4	2	0	0	1	0	cloud
DP	cluster_7688	FISNACHT	1	2	0	0	1	0	cloud
DP	cluster_7689	FISNACHT	1	4	0	0	1	0	cloud
DP	cluster_7698	FISNACHT	1	2	0.0018	0.0003	0.166	-1.37929	cloud
DP	cluster_7708	FISNACHT	2	8	0	0	1	0	shell
DP	cluster_7709	FISNACHT	2	6	0.0009	0.0007	0.777	0.282805	None
DP	cluster_7716	FISNACHT	2	13	0	0	1	0	shell
DP	cluster_7718	FISNACHT	2	8	0.007	0.005	0.714	-0.339557	shell
DP	cluster_7722	FISNACHT	2	3	0	0	1	0	cloud
DP	cluster_7731	FISNACHT	2	2	0	0	1	0	cloud
DP	cluster_7732	FISNACHT	2	3	0	0	1	0	cloud
DP	cluster_7738	FISNACHT	2	4	0	0	1	0	shell
DP	cluster_7739	FISNACHT	2	1	0	0	1	0	cloud
DP	cluster_7741	FISNACHT	2	1	0	0	1	0	None
DP	cluster_7742	FISNACHT	2	7	0.0132	0.0051	0.386	-1.76334	cloud
DP	cluster_7746	FISNACHT	2	6	0.0035	0.001	0.285	-1.8956	cloud
DP	cluster_7748	FISNACHT	2	3	0	0	1	0	cloud
DP	cluster_7749	FISNACHT	2	1	0	0	1	0	cloud
DP	cluster_7752	FISNACHT	2	5	0	0	1	0	cloud
DP	cluster_7757	FISNACHT	2	4	0.001	0.0004	0.4	-0.661564	cloud
DP	cluster_7771	FISNACHT	2	3	0	0	1	0	shell
DP	cluster_7772	FISNACHT	2	2	0.0089	0.0015	0.168	-2.03458	shell
DP	cluster_7774	FISNACHT	3	7	0.006	0.0036	0.6	-0.723428	cloud
DP	cluster_7776	FISNACHT	3	5	0	0	1	0	cloud
DP	cluster_7781	FISNACHT	3	1	0.0045	0.0002	0.044	-2.2417	shell
DP	cluster_7785	FISNACHT	3	6	0.0043	0.0018	0.418	-1.37487	cloud
DP	cluster_7790	FISNACHT	3	2	0.0126	0.0011	0.087	-2.76105	cloud
DP	cluster_7795	FISNACHT	3	3	0.0024	0.0003	0.125	-2.12197	None
DP	cluster_7804	FISNACHT	3	3	0.0082	0.0025	0.304	-1.48597	shell
DP	cluster_7806	FISNACHT	3	13	0.0081	0.0056	0.691	-0.888314	shell
DP	cluster_7808	FISNACHT	3	6	0.0035	0.002	0.571	-0.589171	cloud
DP	cluster_7818	FISNACHT	3	1	0.0119	0.0022	0.184	-0.619423	None
DP	cluster_7824	FISNACHT	3	1	0.0107	0.0014	0.13	-1.41386	None
DP	cluster_7826	FISNACHT	3	3	0.0009	0.0001	0.111	-1.87317	shell
DP	cluster_7834	FISNACHT	4	15	0.0083	0.0071	0.855	-0.412086	shell
DP	cluster_7838	FISNACHT	4	5	0.0024	0.0003	0.125	-2.4165	shell
DP	cluster_7847	FISNACHT	4	6	0.0001	0	0	-1.10856	cloud
DP	cluster_7851	FISNACHT	4	1	0.0011	0.0001	0.09	-1.10564	shell
DP	cluster_7867	FISNACHT	1	1	0.0062	0.0006	0.096	-1.65746	cloud
DP	cluster_7873	FISNACHT	1	4	0	0	1	0	shell
DP	cluster_7875	FISNACHT	2	1	0.0005	0	0	-1.12411	cloud
DP	cluster_7883	FISNACHT	2	1	0	0	1	0	shell
DP	cluster_7890	FISNACHT	2	7	0.0055	0.0024	0.436	-1.4454	shell
DP	cluster_7897	FISNACHT	2	10	0.008	0.008	1	0.615594	shell
DP	cluster_7903	FISNACHT	2	10	0.0112	0.012	1.071	1.02192	shell
DP	cluster_7906	FISNACHT	2	14	0.0064	0.0045	0.703	-0.823622	shell
DP	cluster_7908	FISNACHT	2	4	0.0004	0.0003	0.75	0.43533	cloud
DP	cluster_7911	FISNACHT	3	2	0	0	1	0	cloud
DP	cluster_7913	FISNACHT	3	2	0.0003	0	0	-1.09133	None
DP	cluster_7919	FISNACHT	3	3	0.0119	0.0035	0.294	-1.68526	shell
DP	cluster_7926	FISNACHT	3	1	0.0022	0.0001	0.045	-1.87967	shell
DP	cluster_7938	FISNACHT	4	7	0	0	1	0	cloud
DP	cluster_7940	FISNACHT	4	6	0.0001	0.0001	1	-0.306583	cloud
DP	cluster_7941	FISNACHT	4	19	0.0144	0.0113	0.784	-0.893036	core
DP	cluster_7942	FISNACHT	4	15	0.0045	0.0037	0.822	-0.470336	core
DP	cluster_7959	FISNACHT	1	7	0.0099	0.0068	0.686	-0.413655	core
DP	cluster_7994	FISNACHT	3	3	0.0074	0.0021	0.283	-1.60946	shell
DP	cluster_7996	FISNACHT	3	5	0.0024	0.0008	0.333	-1.47123	cloud
DP	cluster_7997	FISNACHT	3	7	0.0028	0.0024	0.857	0.485127	shell
DP	cluster_7999	FISNACHT	3	4	0	0	1	0	cloud
DP	cluster_8001	FISNACHT	3	6	0	0	1	0	shell
DP	cluster_8002	FISNACHT	3	4	0	0	1	0	shell
DP	cluster_8007	FISNACHT	3	4	0	0	1	0	cloud
DP	cluster_8012	FISNACHT	3	14	0.0018	0.002	1.111	0.508088	shell
DP	cluster_8020	FISNACHT	4	1	0	0	1	0	shell
DP	cluster_8021	FISNACHT	4	8	0.0042	0.0018	0.428	-1.52993	shell
DP	cluster_8023	FISNACHT	4	5	0.0104	0.0066	0.634	-0.171275	shell
DP	cluster_8026	FISNACHT	4	2	0.0006	0.0002	0.333	0.0630522	cloud
DP	cluster_8036	FISNACHT	1	4	0.0002	0	0	-1.12411	cloud
DP	cluster_8038	FISNACHT	1	2	0	0	1	0	cloud
DP	cluster_8053	FISNACHT	2	4	0.0032	0.0005	0.156	-2.38756	cloud
DP	cluster_8057	FISNACHT	2	2	0	0	1	0	cloud
DP	cluster_8069	FISNACHT	2	6	0	0	1	0	cloud
DP	cluster_8070	FISNACHT	2	1	0	0	1	0	cloud
DP	cluster_8073	FISNACHT	2	3	0.0019	0.0002	0.105	-2.24559	shell
DP	cluster_8075	FISNACHT	2	7	0	0	1	0	shell
DP	cluster_8076	FISNACHT	3	3	0.0027	0.0005	0.185	-1.85411	cloud
DP	cluster_8079	FISNACHT	3	3	0	0	1	0	cloud
DP	cluster_8081	FISNACHT	3	8	0.0029	0.0008	0.275	-2.02237	shell
DP	cluster_8089	FISNACHT	3	7	0.0049	0.0023	0.469	-1.31802	cloud
DP	cluster_8094	FISNACHT	3	3	0.0087	0.0019	0.218	-2.03809	cloud
DP	cluster_8095	FISNACHT	3	12	0.0038	0.0038	1	0.472553	cloud
DP	cluster_8303	FISNACHT	3	1	0	0	1	0	shell
DP	cluster_8313n	FISNACHT	3	3	0	0	1	0	cloud
DP	cluster_8320	FISNACHT	4	4	0.001	0.0002	0.2	-1.66947	shell
DP	cluster_8331	FISNACHT	1	1	0	0	1	0	None
DP	cluster_8336	FISNACHT	1	3	0	0	1	0	cloud
DP	cluster_8339	FISNACHT	1	8	0	0	1	0	shell
DP	cluster_8344	FISNACHT	1	4	0.0089	0.003	0.337	-1.55554	shell
DP	cluster_8360	FISNACHT	1	9	0.0024	0.0007	0.291	-2.05133	shell
DP	cluster_8364	FISNACHT	2	6	0	0	1	0	cloud
DP	cluster_8368	FISNACHT	2	2	0.004	0.0008	0.2	-1.6217	cloud
DP	cluster_8376	FISNACHT	2	11	0.0049	0.0019	0.387	-1.90646	cloud
DP	cluster_8382	FISNACHT	2	1	0	0	1	0	None
DP	cluster_8386	FISNACHT	2	9	0.0044	0.0016	0.363	-1.82072	cloud
DP	cluster_8390	FISNACHT	2	5	0.0046	0.0008	0.173	-2.43122	cloud
DP	cluster_8394	FISNACHT	2	7	0.0089	0.0036	0.404	-1.63241	shell
DP	cluster_8395	FISNACHT	2	1	0	0	1	0	cloud
DP	cluster_8397	FISNACHT	2	4	0.005	0.0021	0.42	-1.04202	shell
DP	cluster_8404	FISNACHT	2	1	0	0	1	0	cloud
DP	cluster_8412	FISNACHT	2	2	0	0	1	0	cloud
DP	cluster_8414	FISNACHT	2	4	0.003	0.001	0.333	-1.32129	cloud
DP	cluster_8416	FISNACHT	2	5	0.0074	0.0017	0.229	-2.24214	cloud
DP	cluster_8428	FISNACHT	3	3	0.0004	0	0	-1.47634	cloud
DP	cluster_8430	FISNACHT	3	4	0	0	1	0	None
DP	cluster_8438	FISNACHT	3	6	0.002	0.0004	0.2	-2.07944	cloud
DP	cluster_8448	FISNACHT	3	3	0	0	1	0	None
DP	cluster_8450	FISNACHT	3	3	0.0044	0.0005	0.113	-2.57139	cloud
DP	cluster_8455	FISNACHT	3	6	0	0	1	0	None
DP	cluster_8457	FISNACHT	3	5	0.0032	0.0021	0.656	-0.0376504	cloud
DP	cluster_8460	FISNACHT	3	3	0.0121	0.0057	0.471	-0.463286	cloud
DP	cluster_8465	FISNACHT	3	7	0.0108	0.0096	0.888	0.583948	shell
DP	cluster_8471	FISNACHT	3	3	0.0002	0	0	-1.12411	cloud
DP	cluster_8474	FISNACHT	3	1	0	0	1	0	None
DP	cluster_8479	FISNACHT	4	2	0	0	1	0	None
DP	cluster_8485	FISNACHT	4	4	0.003	0.0004	0.133	-2.45236	cloud
DP	cluster_8486	FISNACHT	4	9	0.0133	0.0085	0.639	-0.866541	shell
DP	cluster_8487	FISNACHT	4	9	0	0	1	0	core
DP	cluster_8491	FISNACHT	4	2	0	0	1	0	None
DP	cluster_8491n	FISNACHT	2	13	0.0029	0.0033	1.137	0.47204	cloud
DP	cluster_8493	FISNACHT	4	2	0	0	1	0	None
DP	cluster_8512	FISNACHT	1	3	0	0	1	0	shell
DP	cluster_8513	FISNACHT	1	14	0.0188	0.019	1.01	0.31261	shell
DP	cluster_8518	FISNACHT	1	17	0.0018	0.0003	0.166	-2.40804	core
DP	cluster_8527	FISNACHT	2	7	0	0	1	0	shell
DP	cluster_8536	FISNACHT	2	7	0	0	1	0	cloud
DP	cluster_8538	FISNACHT	2	1	0.0113	0.001	0.088	-2.007	cloud
DP	cluster_8565	FISNACHT	3	9	0.0031	0.0042	1.354	2.16444	cloud
DP	cluster_8567	FISNACHT	4	5	0	0	1	0	shell
DP	cluster_8575	FISNACHT	4	2	0	0	1	0	cloud
DP	cluster_8576	FISNACHT	4	2	0.0046	0.0004	0.086	-2.50967	None
DP	cluster_8591	FISNACHT	1	5	0	0	1	0	shell
DP	cluster_8593	FISNACHT	1	2	0	0	1	0	cloud
DP	cluster_8603	FISNACHT	1	4	0	0	1	0	shell
DP	cluster_8622n	FISNACHT	4	1	0.0068	0.0014	0.205	-0.299983	shell
DP	cluster_8625	FISNACHT	2	2	0.0123	0.0029	0.235	-1.60904	cloud
DP	cluster_8626	FISNACHT	2	1	0	0	1	0	cloud
DP	cluster_8628	FISNACHT	2	2	0.008	0.0012	0.15	-2.15221	cloud
DP	cluster_8640	FISNACHT	2	3	0	0	1	0	cloud
DP	cluster_8644	FISNACHT	2	8	0.0013	0.0006	0.461	-1.00776	shell
DP	cluster_8648	FISNACHT	2	2	0.0065	0.0008	0.123	-2.3078	cloud
DP	cluster_8654	FISNACHT	2	3	0	0	1	0	cloud
DP	cluster_8661	FISNACHT	2	4	0	0	1	0	cloud
DP	cluster_8663	FISNACHT	2	3	0.0024	0.0016	0.666	0.728143	shell
DP	cluster_8669	FISNACHT	3	6	0.0013	0.0004	0.307	-1.53182	cloud
DP	cluster_8688n	FISNACHT	3	5	0	0	1	0	shell
DP	cluster_8719	FISNACHT	4	1	0	0	1	0	None
DP	cluster_8721	FISNACHT	4	2	0.0021	0.0001	0.047	-2.18004	cloud
DP	cluster_8744	FISNACHT	1	1	0	0	1	0	cloud
DP	cluster_8746	FISNACHT	1	16	0	0	1	0	core
DP	cluster_8753	FISNACHT	2	1	0	0	1	0	shell
DP	cluster_8754	FISNACHT	2	3	0	0	1	0	cloud
DP	cluster_8760	FISNACHT	2	4	0.0015	0.0005	0.333	-1.212	cloud
DP	cluster_8763	FISNACHT	2	3	0.0032	0.001	0.312	-1.18929	cloud
DP	cluster_8771	FISNACHT	2	1	0	0	1	0	cloud
DP	cluster_8791	FISNACHT	3	5	0	0	1	0	shell
DP	cluster_8792	FISNACHT	3	2	0	0	1	0	shell
DP	cluster_8939	FISNACHT	2	4	0	0	1	0	cloud
DP	cluster_8942	FISNACHT	2	1	0.0193	0.0026	0.134	-1.42694	cloud
DP	cluster_8965	FISNACHT	2	1	0.0051	0.0011	0.215	-0.102605	cloud
DP	cluster_9016	FISNACHT	2	4	0.0087	0.0058	0.666	0.351018	shell
DP	cluster_9023	FISNACHT	3	2	0	0	1	0	cloud
DP	cluster_9052	FISNACHT	3	4	0.0035	0.0009	0.257	-1.75714	shell
DP	cluster_9110	FISNACHT	3	3	0.0029	0.0008	0.275	-1.51164	cloud
DP	cluster_9163	FISNACHT	4	9	0.0059	0.0051	0.864	0.286636	shell
DP	cluster_9267	FISNACHT	2	2	0.0167	0.0044	0.263	-1.36587	shell
DP	cluster_9271	FISNACHT	2	2	0	0	1	0	cloud
DP	cluster_9279	FISNACHT	2	1	0	0	1	0	shell
DP	cluster_9293	FISNACHT	2	2	0	0	1	0	cloud
DP	cluster_9316	FISNACHT	3	2	0.021	0.0066	0.314	-0.983541	shell
DP	cluster_9343n	FISNACHT	2	4	0.0024	0.0003	0.125	-2.36037	shell
DP	cluster_9346	FISNACHT	3	3	0.0007	0.0001	0.142	-1.1247	cloud
DP	cluster_9374	FISNACHT	3	1	0.0068	0.0005	0.073	-2.01059	shell
DP	cluster_9376	FISNACHT	3	1	0	0	1	0	shell
DP	cluster_9380	FISNACHT	3	2	0	0	1	0	shell
DP	cluster_9395	FISNACHT	3	3	0.0146	0.0045	0.308	-1.52247	shell
DP	cluster_9440	FISNACHT	1	2	0.0164	0.0044	0.268	-1.32636	shell
DP	cluster_9462	FISNACHT	1	12	0.0196	0.0191	0.974	0.365231	shell
DP	cluster_9476	FISNACHT	2	2	0	0	1	0	shell
DP	cluster_9511	FISNACHT	2	1	0.0062	0.0003	0.048	-2.38908	shell
DP	cluster_9513n	FISNACHT	2	2	0.0043	0.0007	0.162	-1.9228	shell
DP	cluster_9526	FISNACHT	2	3	0.0109	0.0074	0.678	0.939859	cloud
DP	cluster_9571	FISNACHT	3	4	0.0052	0.0016	0.307	-1.586	shell
DP	cluster_9587n	FISNACHT	2	5	0.006	0.0032	0.533	-0.623561	shell
DP	cluster_9659	FISNACHT	3	4	0.0008	0.0002	0.25	-1.14583	shell
DP	cluster_9698	FISNACHT	4	1	0.0164	0.0009	0.054	-2.58276	shell
DP	cluster_9709	FISNACHT	1	1	0.0306	0.0031	0.101	-2.02722	shell
DP	cluster_9726	FISNACHT	1	4	0	0	1	0	cloud
DP	cluster_9733	FISNACHT	1	1	0.0028	0.0005	0.178	-0.568951	cloud
DP	cluster_9741	FISNACHT	multiple	3	0.0002	0.0001	0.5	-0.00429047	shell
DP	cluster_9759	FISNACHT	2	7	0	0	1	0	shell
DP	cluster_9762	FISNACHT	2	1	0	0	1	0	shell
DP	cluster_9789n	FISNACHT	2	1	0	0	1	0	cloud
DP	cluster_9818	FISNACHT	3	1	0	0	1	0	cloud
DP	cluster_9830	FISNACHT	3	3	0.0037	0.0014	0.378	-0.861458	cloud
DP	cluster_9899	FISNACHT	1	18	0	0	1	0	core
DP	cluster_10304n	FISNACHT	2	6	0	0	1	0	shell
DP	cluster_10564n	FISNACHT	4	3	0	0	1	0	cloud
DP	cluster_10724n	FISNACHT	1	5	0	0	1	0	cloud
DP	cluster_10972n	FISNACHT	2	10	0	0	1	0	shell
DP	cluster_11100n	FISNACHT	4	2	0	0	1	0	cloud
DP	cluster_12382n	FISNACHT	3	3	0	0	1	0	shell
DP	cluster_12488n	FISNACHT	2	6	0	0	1	0	shell
DP	cluster_12665n	FISNACHT	3	10	0	0	1	0	shell
DP	cluster_13229n	FISNACHT	4	3	0	0	1	0	cloud
DP	cluster_13935n	FISNACHT	3	8	0	0	1	0	shell
DP	cluster_14033n	FISNACHT	3	12	0	0	1	0	shell
DP	cluster_14521n	FISNACHT	3	6	0	0	1	0	shell
DP	cluster_14594n	FISNACHT	3	3	0	0	1	0	shell
DP	cluster_14678n	FISNACHT	2	10	0	0	1	0	cloud
DP	cluster_14782n	FISNACHT	2	5	0	0	1	0	shell
DP	cluster_14830n	FISNACHT	2	3	0	0	1	0	cloud
DP	cluster_15294n	FISNACHT	3	1	0	0	1	0	cloud
DP	cluster_15435n	FISNACHT	1	2	0	0	1	0	cloud
DP	cluster_15445n	FISNACHT	2	3	0	0	1	0	cloud
DP	cluster_16163n	FISNACHT	3	2	0	0	1	0	shell
DP	cluster_16200n	FISNACHT	1	10	0	0	1	0	cloud
DP	cluster_16261n	FISNACHT	3	19	0	0	1	0	shell
DP	cluster_16304n	FISNACHT	3	4	0	0	1	0	shell
DP	cluster_16352n	FISNACHT	2	3	0	0	1	0	cloud
DP	cluster_16494n	FISNACHT	3	2	0	0	1	0	shell
DP	cluster_16521n	FISNACHT	3	8	0	0	1	0	shell
DP	cluster_16568n	FISNACHT	2	5	0	0	1	0	cloud
DP	cluster_16657n	FISNACHT	2	7	0	0	1	0	shell
DP	cluster_16803n	FISNACHT	3	1	0	0	1	0	cloud
DP	cluster_17071n	FISNACHT	4	6	0	0	1	0	shell
DP	cluster_17091n	FISNACHT	2	8	0	0	1	0	shell
DP	cluster_17119n	FISNACHT	2	13	0	0	1	0	shell
DP	cluster_17318n	FISNACHT	2	7	0	0	1	0	cloud
DP	cluster_17431n	FISNACHT	2	7	0	0	1	0	cloud
DP	cluster_17652n	FISNACHT	3	6	0	0	1	0	shell
DP	cluster_17716n	FISNACHT	1	13	0	0	1	0	core
DP	cluster_17903n	FISNACHT	1	2	0	0	1	0	shell
DP	cluster_18015n	FISNACHT	2	1	0	0	1	0	cloud
DP	cluster_18116n	FISNACHT	2	3	0	0	1	0	cloud
DP	cluster_18368n	FISNACHT	2	3	0	0	1	0	cloud
DP	cluster_18614n	FISNACHT	3	5	0	0	1	0	shell
DP	cluster_18676n	FISNACHT	4	7	0	0	1	0	cloud
DP	cluster_18718n	FISNACHT	3	7	0	0	1	0	shell
DP	cluster_19158n	FISNACHT	1	6	0	0	1	0	shell
DP	cluster_19392n	FISNACHT	4	1	0	0	1	0	cloud
DP	cluster_19499n	FISNACHT	3	2	0	0	1	0	shell
DP	cluster_19600n	FISNACHT	2	6	0	0	1	0	shell
DP	cluster_20333n	FISNACHT	3	1	0	0	1	0	shell
DP	cluster_20405n	FISNACHT	2	1	0	0	1	0	cloud
DP	cluster_20433n	FISNACHT	2	4	0	0	1	0	shell
DP	cluster_21045n	FISNACHT	3	1	0	0	1	0	shell
DP	cluster_21278n	FISNACHT	1	5	0	0	1	0	shell
DP	cluster_21365n	FISNACHT	3	10	0	0	1	0	shell
DP	cluster_22177n	FISNACHT	4	3	0	0	1	0	shell
DP	cluster_22212n	FISNACHT	3	13	0	0	1	0	shell
DP	cluster_22565n	FISNACHT	4	2	0	0	1	0	shell
DP	cluster_22800n	FISNACHT	2	5	0	0	1	0	cloud
DP	cluster_23044n	FISNACHT	2	1	0	0	1	0	cloud
DP	cluster_23097n	FISNACHT	1	7	0	0	1	0	shell
DP	cluster_23194n	FISNACHT	3	1	0	0	1	0	cloud
DP	cluster_23270n	FISNACHT	2	9	0	0	1	0	shell
DP	cluster_23332n	FISNACHT	3	7	0	0	1	0	cloud
DP	cluster_23583n	FISNACHT	3	6	0	0	1	0	shell
DP	cluster_24371n	FISNACHT	1	5	0	0	1	0	shell
DP	cluster_24588n	FISNACHT	1	1	0	0	1	0	shell
DP	cluster_24818n	FISNACHT	3	3	0	0	1	0	shell
DP	cluster_24883n	FISNACHT	2	3	0	0	1	0	shell
DP	cluster_24922n	FISNACHT	2	1	0	0	1	0	shell
DP	cluster_25009n	FISNACHT	2	12	0	0	1	0	shell
DP	cluster_25120n	FISNACHT	4	7	0	0	1	0	core
DP	cluster_25340n	FISNACHT	2	2	0	0	1	0	cloud
DP	cluster_25517n	FISNACHT	3	19	0	0	1	0	core
DP	cluster_25831n	FISNACHT	3	10	0	0	1	0	shell
DP	cluster_25881n	FISNACHT	2	5	0	0	1	0	shell
DP	cluster_25940n	FISNACHT	3	3	0	0	1	0	shell
DP	cluster_25957n	FISNACHT	4	7	0	0	1	0	shell
DP	cluster_26319n	FISNACHT	2	2	0	0	1	0	shell
DP	cluster_27052n	FISNACHT	3	5	0	0	1	0	shell
DP	cluster_27398n	FISNACHT	2	2	0	0	1	0	cloud
DP	cluster_28838n	FISNACHT	2	1	0	0	1	0	cloud
DP	cluster_29278n	FISNACHT	3	1	0	0	1	0	shell
DP	cluster_29341n	FISNACHT	3	7	0	0	1	0	shell
DP	cluster_29354n	FISNACHT	2	5	0	0	1	0	cloud
DP	cluster_29366n	FISNACHT	4	5	0	0	1	0	shell
DP	cluster_29552n	FISNACHT	4	8	0	0	1	0	shell
DP	cluster_30010n	FISNACHT	1	14	0	0	1	0	shell
DP	cluster_30265n	FISNACHT	1	1	0	0	1	0	shell
DP	cluster_30340n	FISNACHT	3	1	0	0	1	0	cloud
DP	cluster_30459n	FISNACHT	2	1	0	0	1	0	shell
DP	cluster_30760n	FISNACHT	1	4	0	0	1	0	shell
DP	cluster_31045n	FISNACHT	3	10	0	0	1	0	shell
DP	cluster_31171n	FISNACHT	2	1	0	0	1	0	shell
DP	cluster_31189n	FISNACHT	2	8	0	0	1	0	shell
DP	cluster_31337n	FISNACHT	2	1	0	0	1	0	shell
DP	cluster_31611n	FISNACHT	2	1	0	0	1	0	cloud
DP	cluster_31954n	FISNACHT	2	1	0	0	1	0	shell
DP	cluster_32109n	FISNACHT	2	4	0	0	1	0	cloud
DP	cluster_32154nn	FISNACHT	1	10	0	0	1	0	shell
DP	cluster_32187nn	FISNACHT	4	4	0	0	1	0	cloud
DP	cluster_32425n	FISNACHT	2	6	0	0	1	0	core
DP	cluster_32700n	FISNACHT	2	8	0	0	1	0	shell
DP	cluster_32974n	FISNACHT	2	3	0	0	1	0	shell
DP	cluster_33121n	FISNACHT	4	14	0	0	1	0	shell
DP	cluster_33292n	FISNACHT	4	1	0	0	1	0	shell
DP	cluster_34099n	FISNACHT	3	11	0	0	1	0	shell
DP	cluster_34245n	FISNACHT	4	2	0	0	1	0	shell
DP	cluster_34378n	FISNACHT	2	3	0	0	1	0	shell
DP	cluster_34475n	FISNACHT	3	5	0	0	1	0	shell
DP	cluster_34649nn	FISNACHT	2	5	0	0	1	0	shell
DP	cluster_35237n	FISNACHT	multiple	2	0	0	1	0	shell
DP	cluster_35628n	FISNACHT	2	1	0	0	1	0	shell
DP	cluster_36156n	FISNACHT	4	3	0	0	1	0	cloud
DP	cluster_37510n	FISNACHT	3	3	0	0	1	0	shell
DP	cluster_37623n	FISNACHT	3	10	0	0	1	0	shell
DP	cluster_38070n	FISNACHT	1	1	0	0	1	0	cloud
DP	cluster_39169n	FISNACHT	2	1	0	0	1	0	cloud
DP	cluster_41995n	FISNACHT	multiple	2	0	0	1	0	cloud
DP	cluster_48037nn	FISNACHT	2	1	0	0	1	0	shell
DP	cluster_50329n	FISNACHT	2	2	0	0	1	0	cloud
DP	cluster_51788n	FISNACHT	3	1	0	0	1	0	cloud
DP	cluster_52104n	FISNACHT	3	4	0.0021	0.0006	0.285	-1.54675	shell
DP	cluster_56330n	FISNACHT	1	11	0.0035	0.0022	0.628	-0.945735	shell
DP	cluster_62513nn	FISNACHT	3	1	0.0011	0	0	-1.47634	shell
DP	cluster_65166n	FISNACHT	3	2	0.0049	0.001	0.204	-1.57097	shell
KG	cluster_2	FISNACHT	1	1	0.0159	0.0022	0.138	-1.55851	cloud
KG	cluster_3	FISNACHT	1	3	0.0004	0.0002	0.5	0.222282	cloud
KG	cluster_5	FISNACHT	1	19	0.0135	0.0104	0.77	-0.771657	core
KG	cluster_24	FISNACHT	1	15	0	0	1	0	shell
KG	cluster_25	FISNACHT	1	2	0	0	1	0	cloud
KG	cluster_31	FISNACHT	2	8	0	0	1	0	shell
KG	cluster_34	FISNACHT	2	11	0	0	1	0	shell
KG	cluster_35	FISNACHT	2	7	0	0	1	0	shell
KG	cluster_36	FISNACHT	2	2	0	0	1	0	shell
KG	cluster_37	FISNACHT	2	6	0	0	1	0	cloud
KG	cluster_39	FISNACHT	2	3	0	0	1	0	cloud
KG	cluster_40	FISNACHT	2	5	0.0022	0.0004	0.181	-2.16039	shell
KG	cluster_41	FISNACHT	2	16	0.0086	0.0104	1.209	0.964682	shell
KG	cluster_42	FISNACHT	2	2	0.0037	0.0005	0.135	-2.02326	shell
KG	cluster_43	FISNACHT	2	3	0.0032	0.0007	0.218	-1.72788	shell
KG	cluster_44	FISNACHT	2	1	0	0	1	0	shell
KG	cluster_48	FISNACHT	2	6	0.006	0.0023	0.383	-1.52267	cloud
KG	cluster_52	FISNACHT	2	10	0.0016	0.0006	0.375	-1.49906	shell
KG	cluster_54	FISNACHT	2	9	0.0082	0.0078	0.951	0.550783	shell
KG	cluster_57	FISNACHT	2	4	0.0035	0.0007	0.2	-2.08394	cloud
KG	cluster_59	FISNACHT	2	1	0.0022	0.0001	0.045	-1.61861	cloud
KG	cluster_60	FISNACHT	2	2	0.0157	0.0041	0.261	-1.48242	cloud
KG	cluster_62	FISNACHT	2	11	0.0102	0.0079	0.774	-0.351797	shell
KG	cluster_66	FISNACHT	2	10	0.0019	0.0009	0.473	-1.2808	shell
KG	cluster_72	FISNACHT	2	5	0.002	0.0005	0.25	-1.82768	cloud
KG	cluster_74	FISNACHT	2	5	0.0004	0.0001	0.25	-0.65402	cloud
KG	cluster_78	FISNACHT	2	10	0.0036	0.0034	0.944	0.456288	shell
KG	cluster_79	FISNACHT	2	14	0.0055	0.0041	0.745	-0.640579	shell
KG	cluster_84	FISNACHT	3	4	0	0	1	0	shell
KG	cluster_85	FISNACHT	3	6	0.0146	0	0	-0.602384	shell
KG	cluster_86	FISNACHT	3	4	0.0002	0	0	-0.73807	cloud
KG	cluster_92	FISNACHT	3	1	0	0	1	0	cloud
KG	cluster_93	FISNACHT	3	18	0.0117	0.0119	1.017	0.107987	core
KG	cluster_95	FISNACHT	3	8	0.0058	0.0025	0.431	-1.50581	shell
KG	cluster_96	FISNACHT	3	1	0.0045	0.0003	0.066	-1.95784	cloud
KG	cluster_97	FISNACHT	3	10	0.0032	0.0024	0.75	-0.339949	shell
KG	cluster_225	FISNACHT	2	16	0	0	1	0	shell
KG	cluster_235	FISNACHT	2	6	0	0	1	0	shell
KG	cluster_241	FISNACHT	2	20	0	0	1	0	core
KG	cluster_250	FISNACHT	2	1	0	0	1	0	cloud
KG	cluster_259	FISNACHT	2	4	0	0	1	0	shell
KG	cluster_263	FISNACHT	2	2	0	0	1	0	cloud
KG	cluster_283	FISNACHT	3	19	0	0	1	0	shell
KG	cluster_285	FISNACHT	3	6	0	0	1	0	shell
KG	cluster_288	FISNACHT	3	9	0	0	1	0	shell
KG	cluster_298	FISNACHT	3	5	0	0	1	0	shell
KG	cluster_318	FISNACHT	3	13	0	0	1	0	shell
KG	cluster_325n	FISNACHT	2	3	0	0	1	0	cloud
KG	cluster_332	FISNACHT	3	11	0	0	1	0	shell
KG	cluster_338	FISNACHT	3	3	0	0	1	0	cloud
KG	cluster_341	FISNACHT	4	2	0	0	1	0	cloud
KG	cluster_350	FISNACHT	4	6	0	0	1	0	shell
KG	cluster_353	FISNACHT	4	9	0	0	1	0	shell
KG	cluster_357	FISNACHT	4	1	0	0	1	0	cloud
KG	cluster_360	FISNACHT	1	7	0	0	1	0	shell
KG	cluster_363	FISNACHT	1	4	0	0	1	0	shell
KG	cluster_371	FISNACHT	1	6	0	0	1	0	shell
KG	cluster_372	FISNACHT	1	5	0	0	1	0	shell
KG	cluster_375	FISNACHT	1	10	0	0	1	0	shell
KG	cluster_379	FISNACHT	1	1	0	0	1	0	cloud
KG	cluster_380	FISNACHT	1	6	0	0	1	0	shell
KG	cluster_381	FISNACHT	1	7	0	0	1	0	shell
KG	cluster_394	FISNACHT	2	1	0	0	1	0	cloud
KG	cluster_396	FISNACHT	2	4	0	0	1	0	cloud
KG	cluster_397	FISNACHT	2	6	0	0	1	0	shell
KG	cluster_400	FISNACHT	2	12	0.0133	0.01	0.751	-0.522026	shell
KG	cluster_403	FISNACHT	2	3	0.0007	0.0002	0.285	-0.849685	cloud
KG	cluster_404	FISNACHT	2	5	0.011	0.0036	0.327	-1.8688	shell
KG	cluster_406	FISNACHT	2	4	0	0	1	0	cloud
KG	cluster_407	FISNACHT	2	5	0.0042	0.0016	0.38	-1.33727	cloud
KG	cluster_411	FISNACHT	2	4	0.0039	0.0012	0.307	-1.5545	shell
KG	cluster_413	FISNACHT	2	12	0.0071	0.0044	0.619	-0.916077	shell
KG	cluster_414	FISNACHT	2	5	0	0	1	0	shell
KG	cluster_419	FISNACHT	2	1	0.0056	0.0003	0.053	-2.13278	cloud
KG	cluster_422	FISNACHT	2	5	0.004	0.0023	0.575	-0.444823	cloud
KG	cluster_423	FISNACHT	2	3	0.0007	0	0	-1.66617	cloud
KG	cluster_424	FISNACHT	2	11	0.0109	0.0066	0.605	-1.04802	shell
KG	cluster_427	FISNACHT	2	1	0	0	1	0	cloud
KG	cluster_428	FISNACHT	2	7	0.006	0.0037	0.616	-0.630058	shell
KG	cluster_429	FISNACHT	2	2	0.0024	0.0004	0.166	-1.65464	cloud
KG	cluster_437	FISNACHT	2	2	0.0136	0.0053	0.389	-0.349803	shell
KG	cluster_438	FISNACHT	2	3	0.0139	0.0062	0.446	-0.794267	shell
KG	cluster_443	FISNACHT	2	1	0	0	1	0	cloud
KG	cluster_446	FISNACHT	2	7	0	0	1	0	shell
KG	cluster_466	FISNACHT	3	2	0.0049	0.0015	0.306	-0.952929	cloud
KG	cluster_469	FISNACHT	3	8	0.0071	0.0082	1.154	1.67784	shell
KG	cluster_483	FISNACHT	3	18	0.0164	0.0138	0.841	-0.651581	core
KG	cluster_486	FISNACHT	3	6	0.0073	0.004	0.547	-0.821155	shell
KG	cluster_488	FISNACHT	3	1	0.0107	0.0011	0.102	-1.74603	cloud
KG	cluster_490	FISNACHT	3	11	0	0	1	0	shell
KG	cluster_493	FISNACHT	3	11	0.0077	0.0065	0.844	-0.138642	shell
KG	cluster_496	FISNACHT	3	11	0.0063	0	0	-1.6416	shell
KG	cluster_510	FISNACHT	3	8	0.008	0.0039	0.487	-1.36396	shell
[truncated: 3,544 more rows]

## Sheet: fig4_B30.2_variation
Population	Cluster	Exon	Group	No_Fish	Watterson	Pi	Ratio	Tajimas_D
TU	cluster_6	B30.2	no	3	0	0	1	0
TU	cluster_40	B30.2	yes	6	0.0018	0.0025	1.388	1.49631
TU	cluster_42	B30.2	no	7	0.0005	0.0002	0.4	-1.16221
TU	cluster_44	B30.2	no	3	0	0	1	0
TU	cluster_49	B30.2	no	1	0.0148	0.0073	0.493	2.31824
TU	cluster_60	B30.2	no	6	0.0012	0.0002	0.166	-1.16221
TU	cluster_67	B30.2	no	5	0.0026	0.0039	1.5	2.18663
TU	cluster_80	B30.2	no	8	0.0011	0.0005	0.454	-1.26668
TU	cluster_84	B30.2	yes	7	0.0017	0.002	1.176	0.708323
TU	cluster_88	B30.2	yes	5	0	0	1	0
TU	cluster_89	B30.2	yes	2	0.009	0.0003	0.033	-0.720697
TU	cluster_419	B30.2	yes	2	0	0	1	0
TU	cluster_427	B30.2	no	1	0	0	1	0
TU	cluster_444	B30.2	no	1	0.0018	0.0002	0.111	-1.16221
TU	cluster_449	B30.2	no	1	0.0055	0.0015	0.272	-0.251441
TU	cluster_498	B30.2	no	1	0	0	1	0
TU	cluster_564n	B30.2	no	7	0.0023	0.0017	0.739	-0.813524
TU	cluster_607	B30.2	no	3	0	0	1	0
TU	cluster_633	B30.2	no	3	0	0	1	0
TU	cluster_659	B30.2	no	7	0	0	1	0
TU	cluster_673	B30.2	no	2	0.0141	0.0093	0.659	0.590021
TU	cluster_691	B30.2	no	6	0	0	1	0
TU	cluster_692	B30.2	no	6	0	0	1	0
TU	cluster_695	B30.2	no	5	0	0	1	0
TU	cluster_698	B30.2	no	5	0	0	1	0
TU	cluster_804	B30.2	no	1	0	0	1	0
TU	cluster_819	B30.2	yes	1	0.0222	0.0087	0.391	1.15504
TU	cluster_867	B30.2	yes	7	0.0011	0.0008	0.727	-0.57783
TU	cluster_880	B30.2	no	1	0.037	0.016	0.432	1.64482
TU	cluster_882	B30.2	yes	6	0.0012	0.001	0.833	-0.179879
TU	cluster_883	B30.2	no	8	0.0005	0.0002	0.4	-1.16221
TU	cluster_891	B30.2	yes	8	0.0016	0.0018	1.125	1.74993
TU	cluster_958	B30.2	yes	3	0.0064	0.0053	0.828	0.642502
TU	cluster_971n	B30.2	no	2	0	0	1	0
TU	cluster_983	B30.2	no	4	0.0049	0.0044	0.897	0.316855
TU	cluster_1113n	B30.2	no	1	0	0	1	0
TU	cluster_1412n	B30.2	yes	6	0	0	1	0
TU	cluster_1583n	B30.2	yes	1	0	0	1	0
TU	cluster_1636n	B30.2	no	1	0	0	1	0
TU	cluster_1789n	B30.2	yes	2	0	0	1	0
TU	cluster_1985n	B30.2	no	1	0	0	1	0
TU	cluster_2737n	B30.2	no	5	0	0	1	0
TU	cluster_2798n	B30.2	no	7	0	0	1	0
TU	cluster_3172n	B30.2	yes	2	0	0	1	0
TU	cluster_3293n	B30.2	no	7	0	0	1	0
TU	cluster_3361n	B30.2	no	7	0	0	1	0
TU	cluster_3489n	B30.2	no	2	0	0	1	0
TU	cluster_3551n	B30.2	no	1	0	0	1	0
TU	cluster_3572n	B30.2	yes	1	0	0	1	0
TU	cluster_4009	B30.2	no	8	0.0044	0.0068	1.545	2.62866
TU	cluster_4045	B30.2	no	5	0.0006	0.0009	1.5	1.43099
TU	cluster_4050	B30.2	no	5	0	0	1	0
TU	cluster_4120	B30.2	no	4	0.0028	0.0013	0.464	-1.26943
TU	cluster_4163	B30.2	no	2	0.004	0.0036	0.9	1.90826
TU	cluster_4175	B30.2	no	5	0.0052	0.0035	0.673	-0.772148
TU	cluster_4199	B30.2	yes	1	0.0055	0.0022	0.4	0.853684
TU	cluster_4408	B30.2	no	3	0.004	0.0016	0.4	-1.3699
TU	cluster_4409	B30.2	no	2	0.001	0.0009	0.9	1.30896
TU	cluster_4412	B30.2	yes	1	0	0	1	0
TU	cluster_4870	B30.2	yes	1	0.0129	0.005	0.387	0.985073
TU	cluster_4917	B30.2	no	8	0	0	1	0
TU	cluster_5903nn	B30.2	yes	3	0.004	0.0048	1.2	2.41761
TU	cluster_6016	B30.2	no	1	0.0074	0.0022	0.297	-0.0526249
TU	cluster_6054	B30.2	no	6	0	0	1	0
TU	cluster_6066	B30.2	no	5	0	0	1	0
TU	cluster_6072	B30.2	no	6	0.0091	0.0125	1.373	1.89285
TU	cluster_6073	B30.2	yes	7	0.0011	0.0005	0.454	-0.0334055
TU	cluster_6083	B30.2	no	1	0.0111	0.0015	0.135	-1.81581
TU	cluster_6327	B30.2	yes	8	0.0022	0.0026	1.181	0.414911
TU	cluster_6338	B30.2	no	6	0	0	1	0
TU	cluster_6375	B30.2	no	3	0.0048	0.0048	1	1.52208
TU	cluster_6378	B30.2	no	5	0	0	1	0
TU	cluster_6387	B30.2	no	4	0.0049	0.0066	1.346	2.36676
TU	cluster_6389	B30.2	no	2	0.002	0.0019	0.95	1.8886
TU	cluster_6575	B30.2	no	4	0.0007	0.0009	1.285	1.45689
TU	cluster_6591	B30.2	yes	1	0	0	1	0
TU	cluster_6593	B30.2	no	4	0.0028	0.002	0.714	-0.325689
TU	cluster_6594	B30.2	no	4	0.0028	0.0039	1.392	2.40809
TU	cluster_6599	B30.2	yes	4	0.0014	0.0014	1	0.837748
TU	cluster_6774	B30.2	no	1	0	0	1	0
TU	cluster_6803n	B30.2	no	8	0	0	1	0
TU	cluster_6919	B30.2	no	4	0.0021	0.0008	0.38	1.13811
TU	cluster_6957	B30.2	no	3	0.0072	0.0073	1.013	1.57092
TU	cluster_6965	B30.2	yes	2	0	0	1	0
TU	cluster_6969	B30.2	no	2	0	0	1	0
TU	cluster_8003	B30.2	yes	1	0.0166	0.0045	0.271	1.95471
TU	cluster_8031	B30.2	no	3	0	0	1	0
TU	cluster_8050	B30.2	no	4	0.0028	0.0017	0.607	-0.706252
TU	cluster_8110	B30.2	no	4	0.0028	0.0035	1.25	1.7959
TU	cluster_8116	B30.2	no	1	0.0092	0.0048	0.521	2.34619
TU	cluster_8161	B30.2	no	1	0.0111	0.002	0.18	-1.40709
TU	cluster_8181	B30.2	no	3	0.004	0.0048	1.2	2.33561
TU	cluster_8208	B30.2	no	5	0.0058	0	0	0
TU	cluster_8223	B30.2	no	3	0.0016	0.0019	1.187	1.87776
TU	cluster_8278	B30.2	no	2	0.001	0.0008	0.8	1.13811
TU	cluster_8642	B30.2	no	1	0.0148	0.0049	0.331	0.333596
TU	cluster_8919	B30.2	yes	8	0	0	1	0
TU	cluster_9833	B30.2	yes	5	0.0137	0.0172	1.255	1.67379
TU	cluster_9847	B30.2	no	4	0.0099	0.0127	1.282	2.35457
TU	cluster_9871	B30.2	no	7	0.0023	0.001	0.434	-1.65962
TU	cluster_10035n	B30.2	no	4	0	0	1	0
TU	cluster_11607n	B30.2	yes	1	0	0	1	0
TU	cluster_13068n	B30.2	no	3	0	0	1	0
TU	cluster_13683n	B30.2	no	4	0	0	1	0
TU	cluster_13815n	B30.2	no	8	0	0	1	0
TU	cluster_14095n	B30.2	no	6	0	0	1	0
TU	cluster_14745n	B30.2	yes	2	0	0	1	0
TU	cluster_15139n	B30.2	no	5	0	0	1	0
TU	cluster_15634n	B30.2	yes	6	0	0	1	0
TU	cluster_16654n	B30.2	yes	4	0	0	1	0
TU	cluster_17997n	B30.2	no	2	0	0	1	0
TU	cluster_18042n	B30.2	yes	7	0	0	1	0
TU	cluster_18071n	B30.2	no	2	0	0	1	0
TU	cluster_18295n	B30.2	no	2	0	0	1	0
TU	cluster_18427n	B30.2	no	1	0	0	1	0
TU	cluster_19223n	B30.2	yes	1	0	0	1	0
TU	cluster_19628n	B30.2	no	7	0	0	1	0
TU	cluster_20376n	B30.2	no	8	0	0	1	0
TU	cluster_20697n	B30.2	no	5	0	0	1	0
TU	cluster_21480n	B30.2	yes	4	0	0	1	0
TU	cluster_21585n	B30.2	no	2	0	0	1	0
TU	cluster_21687n	B30.2	yes	3	0	0	1	0
TU	cluster_22015n	B30.2	yes	2	0	0	1	0
TU	cluster_22757n	B30.2	no	3	0	0	1	0
TU	cluster_23139n	B30.2	yes	1	0	0	1	0
TU	cluster_23225n	B30.2	no	6	0	0	1	0
TU	cluster_23297n	B30.2	yes	2	0	0	1	0
TU	cluster_23313n	B30.2	no	4	0	0	1	0
TU	cluster_23365n	B30.2	no	1	0	0	1	0
TU	cluster_23440n	B30.2	no	2	0	0	1	0
TU	cluster_23585n	B30.2	no	7	0	0	1	0
TU	cluster_23916n	B30.2	no	6	0	0	1	0
TU	cluster_23945n	B30.2	yes	1	0	0	1	0
TU	cluster_24605n	B30.2	no	2	0	0	1	0
TU	cluster_24617n	B30.2	yes	1	0	0	1	0
TU	cluster_24913n	B30.2	yes	5	0	0	1	0
TU	cluster_24954n	B30.2	no	1	0	0	1	0
TU	cluster_25036n	B30.2	no	1	0	0	1	0
TU	cluster_25098n	B30.2	yes	4	0	0	1	0
TU	cluster_25137n	B30.2	no	1	0	0	1	0
TU	cluster_25183n	B30.2	no	2	0	0	1	0
TU	cluster_25194n	B30.2	yes	1	0	0	1	0
TU	cluster_25463n	B30.2	yes	1	0	0	1	0
TU	cluster_25466n	B30.2	yes	5	0	0	1	0
TU	cluster_25558n	B30.2	no	1	0	0	1	0
TU	cluster_25592n	B30.2	no	5	0	0	1	0
TU	cluster_25815n	B30.2	no	8	0	0	1	0
TU	cluster_25843n	B30.2	no	6	0	0	1	0
TU	cluster_25959n	B30.2	yes	8	0	0	1	0
TU	cluster_26152n	B30.2	no	5	0	0	1	0
TU	cluster_26171n	B30.2	no	1	0	0	1	0
TU	cluster_26209n	B30.2	no	1	0	0	1	0
TU	cluster_26249n	B30.2	yes	4	0	0	1	0
TU	cluster_26417n	B30.2	no	2	0	0	1	0
TU	cluster_26955n	B30.2	yes	4	0	0	1	0
TU	cluster_27192n	B30.2	no	8	0	0	1	0
TU	cluster_27331n	B30.2	no	7	0	0	1	0
TU	cluster_27366n	B30.2	no	1	0	0	1	0
TU	cluster_27431n	B30.2	no	1	0	0	1	0
TU	cluster_27646n	B30.2	yes	6	0	0	1	0
TU	cluster_28164n	B30.2	yes	6	0	0	1	0
TU	cluster_28310n	B30.2	yes	4	0	0	1	0
TU	cluster_29507n	B30.2	no	8	0	0	1	0
TU	cluster_30225n	B30.2	yes	5	0	0	1	0
TU	cluster_30397n	B30.2	yes	5	0	0	1	0
TU	cluster_30443n	B30.2	yes	2	0	0	1	0
TU	cluster_30572n	B30.2	no	8	0	0	1	0
TU	cluster_30786n	B30.2	no	7	0	0	1	0
TU	cluster_30911n	B30.2	no	7	0	0	1	0
TU	cluster_31848n	B30.2	yes	1	0	0	1	0
TU	cluster_32277n	B30.2	no	1	0	0	1	0
TU	cluster_32475n	B30.2	no	7	0	0	1	0
TU	cluster_32512n	B30.2	no	1	0	0	1	0
TU	cluster_33598n	B30.2	yes	3	0	0	1	0
TU	cluster_34013n	B30.2	yes	3	0	0	1	0
TU	cluster_34078n	B30.2	yes	5	0	0	1	0
TU	cluster_34215n	B30.2	no	2	0	0	1	0
TU	cluster_34648n	B30.2	no	7	0	0	1	0
TU	cluster_34817n	B30.2	yes	3	0	0	1	0
TU	cluster_35026n	B30.2	no	2	0	0	1	0
TU	cluster_35386n	B30.2	no	8	0	0	1	0
TU	cluster_35550n	B30.2	yes	3	0	0	1	0
TU	cluster_35874n	B30.2	no	3	0	0	1	0
TU	cluster_36241n	B30.2	yes	1	0	0	1	0
TU	cluster_36432n	B30.2	no	2	0	0	1	0
TU	cluster_36594n	B30.2	no	8	0	0	1	0
TU	cluster_37274n	B30.2	no	8	0	0	1	0
TU	cluster_37861n	B30.2	no	5	0	0	1	0
TU	cluster_38235n	B30.2	no	8	0	0	1	0
TU	cluster_38525n	B30.2	yes	6	0	0	1	0
TU	cluster_38539n	B30.2	no	4	0	0	1	0
TU	cluster_38669n	B30.2	yes	4	0	0	1	0
TU	cluster_39798n	B30.2	no	6	0	0	1	0
TU	cluster_39955n	B30.2	no	1	0	0	1	0
TU	cluster_40057n	B30.2	no	4	0	0	1	0
TU	cluster_40590n	B30.2	no	2	0	0	1	0
TU	cluster_40867n	B30.2	no	5	0.0052	0.0068	1.307	1.88885
TU	cluster_41352n	B30.2	no	6	0	0	1	0
TU	cluster_41455n	B30.2	yes	2	0	0	1	0
TU	cluster_41516n	B30.2	no	1	0.0037	0.0011	0.297	0.0750695
TU	cluster_41747n	B30.2	yes	2	0	0	1	0
TU	cluster_41767n	B30.2	no	4	0.0057	0.0078	1.368	2.67733
TU	cluster_41850n	B30.2	no	5	0.0045	0.0027	0.6	-1.06416
TU	cluster_42008n	B30.2	no	7	0	0	1	0
TU	cluster_42344n	B30.2	no	1	0	0	1	0
TU	cluster_42467n	B30.2	no	1	0	0	1	0
TU	cluster_42587n	B30.2	yes	3	0	0	1	0
TU	cluster_42790n	B30.2	no	4	0	0	1	0
TU	cluster_42833n	B30.2	no	6	0	0	1	0
TU	cluster_43053n	B30.2	no	5	0.0019	0.0016	0.842	-0.231177
TU	cluster_43312n	B30.2	no	5	0	0	1	0
TU	cluster_43653n	B30.2	no	2	0	0	1	0
TU	cluster_43968n	B30.2	yes	4	0	0	1	0
TU	cluster_43998n	B30.2	yes	4	0.0021	0.0018	0.857	0.29388
TU	cluster_44353n	B30.2	no	2	0	0	1	0
TU	cluster_44775n	B30.2	no	2	0.0181	0.0074	0.408	-1.11324
TU	cluster_46045n	B30.2	no	1	0	0	1	0
TU	cluster_46164n	B30.2	no	5	0	0	1	0
TU	cluster_46315n	B30.2	yes	2	0	0	1	0
TU	cluster_46916n	B30.2	yes	1	0.0129	0.0026	0.201	-1.20288
TU	cluster_47330n	B30.2	yes	4	0.0035	0.0046	1.314	2.11542
TU	cluster_47472n	B30.2	no	6	0.0116	0.0153	1.318	1.4039
TU	cluster_47811n	B30.2	yes	1	0.0055	0.0018	0.327	0.166842
TU	cluster_48390n	B30.2	yes	2	0	0	1	0
TU	cluster_48621n	B30.2	no	2	0.007	0.0024	0.342	-1.347
TU	cluster_48743n	B30.2	no	4	0	0	1	0
TU	cluster_48946n	B30.2	yes	3	0.0048	0.0035	0.729	0.20341
TU	cluster_49134n	B30.2	no	6	0.0067	0.0081	1.208	1.23653
TU	cluster_49239n	B30.2	yes	1	0.0129	0.0066	0.511	2.45311
TU	cluster_49529n	B30.2	no	6	0.0006	0.0009	1.5	1.38804
TU	cluster_49828n	B30.2	no	1	0	0	1	0
TU	cluster_50759n	B30.2	no	3	0	0	1	0
TU	cluster_50957n	B30.2	no	1	0	0	1	0
TU	cluster_51161n	B30.2	no	5	0	0	1	0
TU	cluster_51208n	B30.2	no	2	0.005	0.0019	0.38	-1.02016
TU	cluster_51567n	B30.2	no	3	0	0	1	0
TU	cluster_51615n	B30.2	no	3	0.004	0.0048	1.2	2.31371
TU	cluster_51624n	B30.2	no	2	0	0	1	0
TU	cluster_51669n	B30.2	no	5	0	0	1	0
TU	cluster_51817n	B30.2	no	3	0	0	1	0
TU	cluster_51823n	B30.2	no	3	0	0	1	0
TU	cluster_52262n	B30.2	no	4	0	0	1	0
TU	cluster_52286n	B30.2	no	7	0	0	1	0
TU	cluster_52435n	B30.2	no	5	0	0	1	0
TU	cluster_52821n	B30.2	yes	1	0	0	1	0
TU	cluster_53401n	B30.2	yes	1	0	0	1	0
TU	cluster_53514n	B30.2	no	8	0	0	1	0
TU	cluster_53645n	B30.2	no	7	0.0005	0.0002	0.4	-1.16221
TU	cluster_53755n	B30.2	no	6	0	0	1	0
TU	cluster_53859n	B30.2	yes	5	0	0	1	0
TU	cluster_54104n	B30.2	yes	7	0.0017	0.0014	0.823	-0.475568
TU	cluster_54459n	B30.2	no	1	0	0	1	0
TU	cluster_54553n	B30.2	no	5	0	0	1	0
TU	cluster_54877n	B30.2	no	7	0.0011	0.0009	0.818	-0.340937
TU	cluster_55175n	B30.2	yes	5	0	0	1	0
TU	cluster_55891n	B30.2	yes	3	0.0024	0.0026	1.083	1.66136
TU	cluster_56013n	B30.2	yes	1	0	0	1	0
TU	cluster_56024n	B30.2	yes	8	0	0	1	0
TU	cluster_56143n	B30.2	yes	4	0	0	1	0
TU	cluster_56305n	B30.2	no	1	0.0166	0.0086	0.518	2.60588
TU	cluster_56553n	B30.2	yes	8	0.0005	0.0002	0.4	-1.16221
TU	cluster_56831n	B30.2	no	4	0.0007	0.0002	0.285	-1.16221
TU	cluster_57063n	B30.2	no	7	0.0029	0.0024	0.827	-0.438953
TU	cluster_57507n	B30.2	no	8	0.0033	0.0039	1.181	0.573142
TU	cluster_57583n	B30.2	no	3	0	0	1	0
TU	cluster_57761n	B30.2	no	8	0	0	1	0
TU	cluster_58075n	B30.2	no	7	0	0	1	0
TU	cluster_58496n	B30.2	no	6	0	0	1	0
TU	cluster_59006n	B30.2	no	2	0.001	0.0002	0.2	-1.16221
TU	cluster_59161n	B30.2	no	7	0	0	1	0
TU	cluster_59247n	B30.2	no	8	0	0	1	0
TU	cluster_59355n	B30.2	yes	1	0	0	1	0
TU	cluster_60138n	B30.2	yes	5	0	0	1	0
TU	cluster_60179n	B30.2	yes	6	0.0006	0.0007	1.166	0.649981
TU	cluster_60282n	B30.2	yes	5	0	0	1	0
TU	cluster_60333n	B30.2	yes	8	0.0005	0.0002	0.4	-1.16221
TU	cluster_60395n	B30.2	no	6	0	0	1	0
TU	cluster_60507n	B30.2	yes	7	0	0	1	0
TU	cluster_60513n	B30.2	yes	6	0	0	1	0
TU	cluster_60554n	B30.2	yes	8	0.0005	0.0002	0.4	-1.16221
TU	cluster_60556n	B30.2	no	8	0	0	1	0
TU	cluster_60599n	B30.2	no	6	0	0	1	0
TU	cluster_60608n	B30.2	yes	6	0	0	1	0
TU	cluster_60648n	B30.2	no	5	0	0	1	0
TU	cluster_60650n	B30.2	no	8	0	0	1	0
TU	cluster_60699n	B30.2	no	8	0	0	1	0
TU	cluster_60728n	B30.2	no	7	0	0	1	0
TU	cluster_60838n	B30.2	no	7	0	0	1	0
TU	cluster_60887n	B30.2	no	7	0	0	1	0
TU	cluster_60958n	B30.2	yes	4	0	0	1	0
TU	cluster_60974n	B30.2	no	7	0	0	1	0
TU	cluster_60975n	B30.2	yes	8	0.0005	0.0002	0.4	-1.16221
TU	cluster_60979n	B30.2	yes	8	0	0	1	0
TU	cluster_61019n	B30.2	yes	3	0	0	1	0
TU	cluster_61075n	B30.2	yes	7	0	0	1	0
TU	cluster_61488nn	B30.2	no	5	0.0013	0.0019	1.461	1.97021
TU	cluster_61587n	B30.2	yes	1	0	0	1	0
TU	cluster_61609n	B30.2	yes	1	0	0	1	0
TU	cluster_61625n	B30.2	no	7	0	0	1	0
TU	cluster_63074n	B30.2	yes	4	0.0049	0.0059	1.204	1.76682
TU	cluster_63492n	B30.2	no	1	0	0	1	0
TU	cluster_65310n	B30.2	yes	6	0.0006	0.0002	0.333	-1.16221
TU	cluster_66834n	B30.2	no	5	0.0013	0.0014	1.076	0.837748
TU	cluster_71488n	B30.2	no	4	0.0014	0.0019	1.357	1.87776
TU	cluster_72397n	B30.2	no	5	0.0039	0.0043	1.102	0.945164
TU	cluster_75682n	B30.2	no	6	0	0	1	0
TU	cluster_75862n	B30.2	no	1	0	0	1	0
TU	cluster_77250n	B30.2	yes	7	0.0011	0.0008	0.727	-0.57783
TU	cluster_79779n	B30.2	no	2	0	0	1	0
TU	cluster_82752n	B30.2	yes	8	0.0022	0.0035	1.59	1.63902
TU	cluster_84498n	B30.2	no	2	0	0	1	0
TU	cluster_85992nn	B30.2	yes	5	0	0	1	0
TU	cluster_90809n	B30.2	no	5	0	0	1	0
TU	cluster_90900nn	B30.2	yes	2	0.003	0.0007	0.233	-1.53785
TU	cluster_95119n	B30.2	yes	7	0.0005	0.0002	0.4	-1.16221
TU	cluster_111355nn	B30.2	no	4	0	0	1	0
TU	cluster_122905n	B30.2	no	4	0	0	1	0
TU	cluster_133624nn	B30.2	yes	5	0	0	1	0
TU	cluster_138220nn	B30.2	yes	8	0	0	1	0
CGN	cluster_4	B30.2	no	5	0.0111	0.0093	0.837	-0.121007
CGN	cluster_6	B30.2	no	8	0	0	1	0
CGN	cluster_40	B30.2	yes	8	0	0	1	0
CGN	cluster_42	B30.2	no	6	0.0006	0.0002	0.333	-1.16221
CGN	cluster_44	B30.2	no	3	0	0	1	0
CGN	cluster_48	B30.2	yes	6	0	0	1	0
CGN	cluster_49	B30.2	no	2	0.0111	0.0059	0.531	-0.255135
CGN	cluster_60	B30.2	no	7	0.0005	0.0002	0.4	-1.0535
CGN	cluster_63	B30.2	yes	2	0	0	1	0
CGN	cluster_65	B30.2	no	5	0.0137	0.018	1.313	2.06561
CGN	cluster_67	B30.2	no	7	0.0029	0.0021	0.724	-0.736884
CGN	cluster_80	B30.2	no	8	0.0027	0.0007	0.259	0.649981
CGN	cluster_82	B30.2	no	7	0	0	1	0
CGN	cluster_84	B30.2	yes	8	0.0033	0.0053	1.606	1.75342
CGN	cluster_88	B30.2	yes	6	0.0006	0.0002	0.333	-1.16221
CGN	cluster_89	B30.2	yes	8	0	0	1	0
CGN	cluster_95	B30.2	yes	8	0	0	1	0
CGN	cluster_98	B30.2	no	6	0	0	1	0
CGN	cluster_403	B30.2	no	3	0.0105	0.0122	1.161	2.5907
CGN	cluster_405	B30.2	no	2	0	0	1	0
CGN	cluster_416	B30.2	yes	8	0	0	1	0
CGN	cluster_419	B30.2	yes	7	0.0011	0.001	0.909	-0.0823774
CGN	cluster_427	B30.2	no	8	0	0	1	0
CGN	cluster_436n	B30.2	yes	7	0.0005	0.0002	0.4	-1.16221
CGN	cluster_444	B30.2	no	1	0	0	1	0
CGN	cluster_446	B30.2	no	8	0.0005	0.0003	0.6	-0.912045
CGN	cluster_447	B30.2	yes	7	0	0	1	0
CGN	cluster_449	B30.2	no	5	0.0006	0.0002	0.333	-1.16221
CGN	cluster_458n	B30.2	yes	1	0.0111	0.0052	0.468	1.8523
CGN	cluster_475n	B30.2	yes	7	0.0005	0.0002	0.4	-1.16221
CGN	cluster_490n	B30.2	yes	7	0.0005	0.0002	0.4	-1.16221
CGN	cluster_498	B30.2	no	1	0	0	1	0
CGN	cluster_499	B30.2	no	1	0.0037	0.0004	0.108	-1.49796
CGN	cluster_564n	B30.2	no	4	0	0	1	0
CGN	cluster_600	B30.2	no	1	0	0	1	0
CGN	cluster_603	B30.2	no	6	0	0	1	0
CGN	cluster_607	B30.2	no	7	0.0011	0.0004	0.363	-1.49796
CGN	cluster_630	B30.2	yes	8	0	0	1	0
CGN	cluster_633	B30.2	no	4	0	0	1	0
CGN	cluster_659	B30.2	no	8	0	0	1	0
CGN	cluster_673	B30.2	no	6	0.0128	0.0095	0.742	0.223785
CGN	cluster_677	B30.2	no	7	0	0	1	0
CGN	cluster_691	B30.2	no	5	0	0	1	0
CGN	cluster_692	B30.2	no	4	0	0	1	0
CGN	cluster_695	B30.2	no	2	0	0	1	0
CGN	cluster_696	B30.2	yes	8	0	0	1	0
CGN	cluster_698	B30.2	no	3	0	0	1	0
CGN	cluster_800	B30.2	yes	8	0	0	1	0
CGN	cluster_802n	B30.2	yes	8	0.0005	0.0002	0.4	-1.16221
CGN	cluster_807	B30.2	no	2	0.0141	0.0091	0.645	0.623496
CGN	cluster_810	B30.2	no	5	0	0	1	0
CGN	cluster_811	B30.2	no	7	0	0	1	0
CGN	cluster_819	B30.2	yes	1	0	0	1	0
CGN	cluster_822	B30.2	no	2	0.002	0.0006	0.3	-1.17552
CGN	cluster_862	B30.2	no	7	0	0	1	0
CGN	cluster_867	B30.2	yes	6	0.0012	0.0011	0.916	-0.0430558
CGN	cluster_880	B30.2	no	6	0.0122	0.013	1.065	0.76098
CGN	cluster_881	B30.2	yes	8	0.0005	0.0002	0.4	-1.16221
CGN	cluster_882	B30.2	yes	6	0.003	0	0	0
CGN	cluster_883	B30.2	no	8	0	0	1	0
CGN	cluster_885	B30.2	no	3	0	0	1	0
CGN	cluster_886n	B30.2	yes	2	0	0	1	0
CGN	cluster_891	B30.2	yes	8	0.0033	0.0058	1.757	2.55584
CGN	cluster_930n	B30.2	no	2	0	0	1	0
CGN	cluster_940n	B30.2	yes	3	0	0	1	0
CGN	cluster_958	B30.2	yes	8	0	0	1	0
CGN	cluster_962n	B30.2	yes	7	0	0	1	0
CGN	cluster_971n	B30.2	no	4	0	0	1	0
CGN	cluster_981	B30.2	yes	1	0	0	1	0
CGN	cluster_982	B30.2	no	8	0.0066	0.008	1.212	2.18376
CGN	cluster_983	B30.2	no	7	0.004	0.0022	0.55	-1.49168
CGN	cluster_986	B30.2	no	7	0.0104	0.0104	1	0.072408
CGN	cluster_989	B30.2	no	5	0	0	1	0
CGN	cluster_1018n	B30.2	no	4	0	0	1	0
CGN	cluster_1028n	B30.2	yes	8	0	0	1	0
CGN	cluster_1113n	B30.2	no	1	0	0	1	0
CGN	cluster_1146n	B30.2	yes	4	0	0	1	0
CGN	cluster_1163n	B30.2	no	6	0	0	1	0
CGN	cluster_1200n	B30.2	yes	4	0	0	1	0
CGN	cluster_1270n	B30.2	no	6	0	0	1	0
CGN	cluster_1276n	B30.2	no	5	0	0	1	0
CGN	cluster_1313n	B30.2	no	6	0	0	1	0
CGN	cluster_1397n	B30.2	yes	2	0	0	1	0
CGN	cluster_1412n	B30.2	yes	7	0	0	1	0
CGN	cluster_1420n	B30.2	yes	8	0	0	1	0
CGN	cluster_1432n	B30.2	yes	7	0	0	1	0
CGN	cluster_1488n	B30.2	no	6	0	0	1	0
CGN	cluster_1506n	B30.2	no	3	0	0	1	0
CGN	cluster_1536n	B30.2	no	8	0	0	1	0
CGN	cluster_1583n	B30.2	yes	8	0	0	1	0
CGN	cluster_1636n	B30.2	no	6	0	0	1	0
CGN	cluster_1669n	B30.2	yes	8	0	0	1	0
CGN	cluster_1692n	B30.2	no	4	0	0	1	0
CGN	cluster_1699n	B30.2	yes	8	0	0	1	0
CGN	cluster_1709n	B30.2	yes	8	0	0	1	0
CGN	cluster_1789n	B30.2	yes	7	0	0	1	0
CGN	cluster_1808nn	B30.2	yes	6	0	0	1	0
CGN	cluster_1810n	B30.2	no	5	0	0	1	0
CGN	cluster_1822n	B30.2	no	3	0	0	1	0
CGN	cluster_1950n	B30.2	no	8	0	0	1	0
CGN	cluster_1985n	B30.2	no	3	0	0	1	0
CGN	cluster_2039n	B30.2	yes	6	0	0	1	0
CGN	cluster_2050n	B30.2	yes	8	0	0	1	0
CGN	cluster_2135n	B30.2	yes	8	0	0	1	0
CGN	cluster_2142n	B30.2	no	7	0	0	1	0
CGN	cluster_2156n	B30.2	no	4	0	0	1	0
CGN	cluster_2183n	B30.2	no	1	0	0	1	0
CGN	cluster_2267n	B30.2	no	3	0	0	1	0
CGN	cluster_2359n	B30.2	yes	3	0	0	1	0
CGN	cluster_2572n	B30.2	yes	8	0	0	1	0
CGN	cluster_2616n	B30.2	no	7	0	0	1	0
CGN	cluster_2695n	B30.2	no	8	0	0	1	0
CGN	cluster_2737n	B30.2	no	8	0	0	1	0
CGN	cluster_2768n	B30.2	no	3	0	0	1	0
CGN	cluster_2798n	B30.2	no	4	0	0	1	0
CGN	cluster_2800n	B30.2	yes	6	0	0	1	0
CGN	cluster_2801n	B30.2	no	6	0	0	1	0
CGN	cluster_2806n	B30.2	no	3	0	0	1	0
CGN	cluster_2851n	B30.2	no	8	0	0	1	0
CGN	cluster_2880n	B30.2	no	5	0	0	1	0
CGN	cluster_2912n	B30.2	no	8	0	0	1	0
CGN	cluster_3011n	B30.2	yes	2	0	0	1	0
CGN	cluster_3032n	B30.2	yes	6	0	0	1	0
CGN	cluster_3050n	B30.2	no	6	0	0	1	0
CGN	cluster_3113n	B30.2	no	4	0	0	1	0
CGN	cluster_3128n	B30.2	yes	1	0	0	1	0
CGN	cluster_3172n	B30.2	yes	7	0	0	1	0
CGN	cluster_3178n	B30.2	no	3	0	0	1	0
CGN	cluster_3234nn	B30.2	yes	8	0	0	1	0
CGN	cluster_3293n	B30.2	no	8	0	0	1	0
CGN	cluster_3345n	B30.2	yes	2	0	0	1	0
CGN	cluster_3352n	B30.2	no	8	0	0	1	0
CGN	cluster_3361n	B30.2	no	8	0	0	1	0
CGN	cluster_3402n	B30.2	yes	6	0	0	1	0
CGN	cluster_3443n	B30.2	no	7	0	0	1	0
CGN	cluster_3472nn	B30.2	no	1	0	0	1	0
CGN	cluster_3489n	B30.2	no	6	0	0	1	0
CGN	cluster_3551n	B30.2	no	5	0	0	1	0
CGN	cluster_3572n	B30.2	yes	7	0	0	1	0
CGN	cluster_3663n	B30.2	no	2	0	0	1	0
CGN	cluster_3688n	B30.2	yes	7	0	0	1	0
CGN	cluster_3706n	B30.2	yes	8	0	0	1	0
CGN	cluster_3852n	B30.2	no	8	0	0	1	0
CGN	cluster_3947n	B30.2	yes	8	0	0	1	0
CGN	cluster_3980n	B30.2	no	1	0	0	1	0
CGN	cluster_4009	B30.2	no	8	0.005	0.0081	1.62	1.99247
CGN	cluster_4024n	B30.2	yes	8	0.0022	0.001	0.454	-1.65962
CGN	cluster_4038n	B30.2	yes	2	0	0	1	0
CGN	cluster_4050	B30.2	no	6	0	0	1	0
CGN	cluster_4121	B30.2	no	4	0	0	1	0
CGN	cluster_4174	B30.2	no	7	0.0029	0.0024	0.827	-0.430068
CGN	cluster_4175	B30.2	no	3	0.0324	0.0307	0.947	1.39079
CGN	cluster_4181	B30.2	no	3	0	0	1	0
CGN	cluster_4211	B30.2	yes	1	0	0	1	0
CGN	cluster_4241nn	B30.2	yes	7	0	0	1	0
CGN	cluster_4294	B30.2	yes	2	0.004	0.0017	0.425	-0.706252
CGN	cluster_4412	B30.2	yes	1	0.0222	0.0083	0.373	0.89384
CGN	cluster_4438nn	B30.2	yes	7	0	0	1	0
CGN	cluster_4849	B30.2	no	1	0.0037	0.0009	0.243	-0.340937
CGN	cluster_4867	B30.2	yes	2	0.001	0.0009	0.9	1.30896
CGN	cluster_4885n	B30.2	yes	1	0	0	1	0
CGN	cluster_4895	B30.2	yes	2	0	0	1	0
CGN	cluster_4917	B30.2	no	5	0	0	1	0
CGN	cluster_5903nn	B30.2	yes	8	0.0039	0.005	1.282	0.986494
CGN	cluster_5992nn	B30.2	no	8	0	0	1	0
CGN	cluster_6016	B30.2	no	1	0.0074	0.0017	0.229	-0.671727
CGN	cluster_6054	B30.2	no	1	0	0	1	0
CGN	cluster_6066	B30.2	no	1	0	0	1	0
CGN	cluster_6072	B30.2	no	4	0.0142	0.0189	1.33	2.79252
CGN	cluster_6083	B30.2	no	4	0.0007	0.0006	0.857	0.381009
CGN	cluster_6338	B30.2	no	1	0	0	1	0
CGN	cluster_6363	B30.2	no	5	0	0	1	0
CGN	cluster_6378	B30.2	no	3	0.0008	0.0002	0.25	-1.0535
CGN	cluster_6575	B30.2	no	4	0	0	1	0
CGN	cluster_6593	B30.2	no	1	0.0037	0.0005	0.135	-1.26668
CGN	cluster_6599	B30.2	yes	1	0.0037	0.0004	0.108	-1.49796
CGN	cluster_6774	B30.2	no	2	0	0	1	0
CGN	cluster_6836nn	B30.2	yes	1	0	0	1	0
CGN	cluster_6919	B30.2	no	3	0.0024	0.0026	1.083	1.66136
CGN	cluster_7454n	B30.2	yes	1	0	0	1	0
CGN	cluster_7532nn	B30.2	no	6	0	0	1	0
CGN	cluster_7932nn	B30.2	yes	1	0	0	1	0
CGN	cluster_8034	B30.2	no	1	0.0074	0.0009	0.121	-1.83088
CGN	cluster_8081n	B30.2	no	2	0.001	0.0009	0.9	1.52862
CGN	cluster_8110	B30.2	no	1	0.0074	0.0017	0.229	-0.744701
CGN	cluster_8116	B30.2	no	2	0.005	0.0028	0.56	-0.0104696
CGN	cluster_8208	B30.2	no	1	0.0537	0.015	0.279	-0.352649
CGN	cluster_8223	B30.2	no	1	0.0111	0.0034	0.306	0.0591801
CGN	cluster_8608	B30.2	no	6	0.0042	0.0034	0.809	-0.469332
CGN	cluster_8642	B30.2	no	6	0.0091	0.0117	1.285	2.82414
CGN	cluster_8849	B30.2	no	6	0	0	1	0
CGN	cluster_8905	B30.2	no	2	0	0	1	0
CGN	cluster_8919	B30.2	yes	8	0	0	1	0
CGN	cluster_8972	B30.2	no	7	0	0	1	0
CGN	cluster_9734n	B30.2	no	4	0.0057	0.0042	0.736	-0.249444
CGN	cluster_9817	B30.2	no	1	0.0037	0.0006	0.162	-1.03789
CGN	cluster_9833	B30.2	yes	8	0.0122	0.0086	0.704	-0.392172
CGN	cluster_10035n	B30.2	no	7	0	0	1	0
CGN	cluster_10878n	B30.2	yes	6	0	0	1	0
CGN	cluster_12784n	B30.2	yes	1	0	0	1	0
CGN	cluster_13068n	B30.2	no	1	0	0	1	0
CGN	cluster_13409n	B30.2	yes	6	0	0	1	0
CGN	cluster_13683n	B30.2	no	1	0	0	1	0
CGN	cluster_13792n	B30.2	no	5	0	0	1	0
CGN	cluster_13815n	B30.2	no	6	0	0	1	0
CGN	cluster_13961n	B30.2	yes	1	0	0	1	0
CGN	cluster_14095n	B30.2	no	6	0	0	1	0
CGN	cluster_15055n	B30.2	yes	1	0	0	1	0
CGN	cluster_15139n	B30.2	no	1	0	0	1	0
CGN	cluster_15755nn	B30.2	no	3	0	0	1	0
CGN	cluster_16654n	B30.2	yes	3	0	0	1	0
CGN	cluster_17997n	B30.2	no	7	0	0	1	0
CGN	cluster_18071n	B30.2	no	1	0	0	1	0
CGN	cluster_18295n	B30.2	no	5	0	0	1	0
CGN	cluster_18427n	B30.2	no	7	0	0	1	0
CGN	cluster_18675n	B30.2	no	4	0	0	1	0
CGN	cluster_19628n	B30.2	no	8	0	0	1	0
CGN	cluster_19700n	B30.2	no	1	0	0	1	0
CGN	cluster_20376n	B30.2	no	1	0	0	1	0
CGN	cluster_21480n	B30.2	yes	2	0	0	1	0
CGN	cluster_22135n	B30.2	no	1	0	0	1	0
CGN	cluster_23100nn	B30.2	no	3	0	0	1	0
CGN	cluster_23225n	B30.2	no	8	0	0	1	0
CGN	cluster_23313n	B30.2	no	3	0	0	1	0
CGN	cluster_23440n	B30.2	no	5	0	0	1	0
CGN	cluster_23448n	B30.2	yes	1	0	0	1	0
CGN	cluster_23585n	B30.2	no	5	0	0	1	0
CGN	cluster_23589n	B30.2	no	6	0	0	1	0
CGN	cluster_23916n	B30.2	no	2	0	0	1	0
CGN	cluster_23945n	B30.2	yes	1	0	0	1	0
CGN	cluster_23989n	B30.2	yes	5	0	0	1	0
CGN	cluster_24206n	B30.2	no	1	0	0	1	0
CGN	cluster_24229n	B30.2	no	2	0	0	1	0
CGN	cluster_24636n	B30.2	yes	7	0	0	1	0
CGN	cluster_24842n	B30.2	yes	1	0	0	1	0
CGN	cluster_24907n	B30.2	no	8	0	0	1	0
CGN	cluster_24954n	B30.2	no	5	0	0	1	0
CGN	cluster_25194n	B30.2	yes	6	0	0	1	0
CGN	cluster_25466n	B30.2	yes	1	0	0	1	0
CGN	cluster_25592n	B30.2	no	5	0	0	1	0
CGN	cluster_25815n	B30.2	no	8	0	0	1	0
CGN	cluster_25843n	B30.2	no	7	0	0	1	0
CGN	cluster_25959n	B30.2	yes	6	0	0	1	0
CGN	cluster_26152n	B30.2	no	6	0	0	1	0
CGN	cluster_26162n	B30.2	yes	6	0	0	1	0
CGN	cluster_26209n	B30.2	no	8	0	0	1	0
CGN	cluster_26249n	B30.2	yes	8	0	0	1	0
CGN	cluster_26921n	B30.2	no	4	0	0	1	0
CGN	cluster_26955n	B30.2	yes	4	0	0	1	0
CGN	cluster_27105n	B30.2	yes	2	0	0	1	0
CGN	cluster_27192n	B30.2	no	7	0	0	1	0
CGN	cluster_27331n	B30.2	no	6	0	0	1	0
CGN	cluster_27366n	B30.2	no	4	0	0	1	0
CGN	cluster_27641n	B30.2	yes	8	0	0	1	0
CGN	cluster_28071n	B30.2	no	8	0	0	1	0
CGN	cluster_28404n	B30.2	no	2	0	0	1	0
CGN	cluster_28670n	B30.2	no	4	0	0	1	0
CGN	cluster_29507n	B30.2	no	5	0	0	1	0
CGN	cluster_29533n	B30.2	no	6	0	0	1	0
CGN	cluster_29770n	B30.2	no	1	0	0	1	0
CGN	cluster_30397n	B30.2	yes	6	0	0	1	0
CGN	cluster_30443n	B30.2	yes	4	0	0	1	0
CGN	cluster_30572n	B30.2	no	1	0	0	1	0
CGN	cluster_30592n	B30.2	no	4	0	0	1	0
CGN	cluster_30786n	B30.2	no	4	0	0	1	0
CGN	cluster_30869n	B30.2	no	1	0	0	1	0
CGN	cluster_30911n	B30.2	no	4	0	0	1	0
CGN	cluster_31181n	B30.2	no	1	0	0	1	0
CGN	cluster_31371n	B30.2	no	1	0	0	1	0
CGN	cluster_31541n	B30.2	no	1	0	0	1	0
CGN	cluster_32017n	B30.2	yes	5	0	0	1	0
CGN	cluster_32475n	B30.2	no	7	0	0	1	0
CGN	cluster_32502n	B30.2	no	3	0	0	1	0
CGN	cluster_32683n	B30.2	no	2	0	0	1	0
CGN	cluster_32728n	B30.2	yes	6	0	0	1	0
CGN	cluster_33102n	B30.2	no	1	0	0	1	0
CGN	cluster_33207n	B30.2	no	6	0	0	1	0
CGN	cluster_33641n	B30.2	no	3	0	0	1	0
CGN	cluster_34174n	B30.2	yes	6	0	0	1	0
CGN	cluster_34215n	B30.2	no	4	0	0	1	0
CGN	cluster_34409n	B30.2	yes	1	0	0	1	0
CGN	cluster_35026n	B30.2	no	6	0	0	1	0
CGN	cluster_35339n	B30.2	no	1	0	0	1	0
CGN	cluster_35429n	B30.2	yes	2	0	0	1	0
CGN	cluster_35550n	B30.2	yes	1	0	0	1	0
CGN	cluster_35900n	B30.2	yes	2	0	0	1	0
CGN	cluster_36218n	B30.2	yes	5	0	0	1	0
CGN	cluster_36241n	B30.2	yes	1	0	0	1	0
CGN	cluster_36329n	B30.2	no	1	0	0	1	0
CGN	cluster_36432n	B30.2	no	6	0	0	1	0
CGN	cluster_36594n	B30.2	no	8	0	0	1	0
CGN	cluster_36737n	B30.2	yes	1	0	0	1	0
CGN	cluster_37274n	B30.2	no	8	0	0	1	0
CGN	cluster_37935n	B30.2	no	1	0	0	1	0
CGN	cluster_38235n	B30.2	no	6	0	0	1	0
CGN	cluster_38450n	B30.2	no	5	0	0	1	0
CGN	cluster_38525n	B30.2	yes	3	0	0	1	0
CGN	cluster_38539n	B30.2	no	4	0	0	1	0
CGN	cluster_38669n	B30.2	yes	5	0	0	1	0
CGN	cluster_38782n	B30.2	no	6	0	0	1	0
CGN	cluster_39643n	B30.2	no	1	0	0	1	0
CGN	cluster_39955n	B30.2	no	3	0	0	1	0
CGN	cluster_40590n	B30.2	no	1	0	0	1	0
CGN	cluster_40867n	B30.2	no	6	0.0061	0.0079	1.295	1.7123
CGN	cluster_40879n	B30.2	no	1	0	0	1	0
CGN	cluster_40943n	B30.2	yes	1	0	0	1	0
CGN	cluster_41352n	B30.2	no	5	0	0	1	0
CGN	cluster_41455n	B30.2	yes	1	0.0018	0.0004	0.222	-0.448318
CGN	cluster_41481n	B30.2	yes	1	0.0018	0.0002	0.111	-1.16221
CGN	cluster_41671n	B30.2	no	6	0.0128	0.0189	1.476	2.30061
CGN	cluster_41767n	B30.2	no	4	0.0071	0.0078	1.098	1.48879
CGN	cluster_41850n	B30.2	no	4	0.0057	0.0056	0.982	1.46132
CGN	cluster_41909n	B30.2	no	1	0	0	1	0
CGN	cluster_42008n	B30.2	no	4	0	0	1	0
CGN	cluster_42467n	B30.2	no	2	0	0	1	0
CGN	cluster_42587n	B30.2	yes	5	0	0	1	0
CGN	cluster_42765n	B30.2	no	1	0	0	1	0
CGN	cluster_42790n	B30.2	no	2	0	0	1	0
CGN	cluster_42833n	B30.2	no	8	0	0	1	0
CGN	cluster_42909n	B30.2	yes	1	0	0	1	0
CGN	cluster_43053n	B30.2	no	7	0.0017	0	0	0
CGN	cluster_43155n	B30.2	no	7	0	0	1	0
CGN	cluster_43293n	B30.2	yes	2	0.002	0.0005	0.25	-1.35784
CGN	cluster_43312n	B30.2	no	8	0	0	1	0
CGN	cluster_43709n	B30.2	no	1	0	0	1	0
CGN	cluster_43968n	B30.2	yes	2	0	0	1	0
CGN	cluster_44308n	B30.2	no	6	0	0	1	0
CGN	cluster_44353n	B30.2	no	5	0.0019	0.0014	0.736	-0.386136
CGN	cluster_44775n	B30.2	no	8	0.0044	0.0015	0.34	0.397346
CGN	cluster_46045n	B30.2	no	1	0	0	1	0
CGN	cluster_46315n	B30.2	yes	1	0	0	1	0
CGN	cluster_46741n	B30.2	no	6	0.0012	0.0008	0.666	-0.57783
CGN	cluster_46916n	B30.2	yes	7	0.0017	0.0012	0.705	-0.654434
CGN	cluster_46965n	B30.2	yes	7	0.004	0	0	0
CGN	cluster_47811n	B30.2	yes	2	0.001	0	0	0
CGN	cluster_47896n	B30.2	no	1	0	0	1	0
CGN	cluster_47903n	B30.2	yes	1	0	0	1	0
CGN	cluster_48025n	B30.2	no	6	0.0018	0.0022	1.222	0.94881
CGN	cluster_48279n	B30.2	yes	1	0.0074	0.0009	0.121	-1.83088
CGN	cluster_48449n	B30.2	no	7	0.0011	0.0005	0.454	-1.35784
CGN	cluster_48964n	B30.2	yes	2	0.005	0.0022	0.44	-0.701549
CGN	cluster_49011n	B30.2	no	1	0	0	1	0
CGN	cluster_49239n	B30.2	yes	3	0.0016	0.0016	1	1.15232
CGN	cluster_49833n	B30.2	no	1	0	0	1	0
CGN	cluster_50237n	B30.2	no	1	0	0	1	0
CGN	cluster_50295n	B30.2	no	1	0	0	1	0
CGN	cluster_50957n	B30.2	no	1	0	0	1	0
CGN	cluster_51088n	B30.2	no	4	0.0364	0.0388	1.065	1.38938
CGN	cluster_51615n	B30.2	no	4	0.0035	0.0029	0.828	0.221998
CGN	cluster_52286n	B30.2	no	4	0	0	1	0
CGN	cluster_52298n	B30.2	yes	2	0	0	1	0
CGN	cluster_52435n	B30.2	no	3	0	0	1	0
CGN	cluster_52522n	B30.2	yes	1	0	0	1	0
CGN	cluster_52821n	B30.2	yes	8	0	0	1	0
CGN	cluster_52851n	B30.2	yes	1	0	0	1	0
CGN	cluster_53150n	B30.2	yes	7	0.0023	0	0	0
CGN	cluster_53401n	B30.2	yes	1	0	0	1	0
CGN	cluster_53517n	B30.2	no	1	0	0	1	0
CGN	cluster_53729n	B30.2	no	1	0.0092	0.0047	0.51	2.28999
CGN	cluster_53817n	B30.2	no	6	0	0	1	0
CGN	cluster_54459n	B30.2	no	7	0	0	1	0
CGN	cluster_54553n	B30.2	no	5	0	0	1	0
CGN	cluster_54877n	B30.2	no	5	0.0045	0.0058	1.288	2.54618
CGN	cluster_55733n	B30.2	no	5	0	0	1	0
CGN	cluster_55891n	B30.2	yes	1	0.0037	0.0005	0.135	-1.35784
CGN	cluster_56024n	B30.2	yes	5	0	0	1	0
CGN	cluster_56143n	B30.2	yes	5	0	0	1	0
CGN	cluster_56269n	B30.2	no	3	0	0	1	0
CGN	cluster_56553n	B30.2	yes	6	0	0	1	0
CGN	cluster_56759n	B30.2	no	1	0	0	1	0
CGN	cluster_56831n	B30.2	no	2	0.004	0.0024	0.6	0.245352
CGN	cluster_57063n	B30.2	no	7	0.0011	0.0002	0.181	-1.16221
CGN	cluster_57105n	B30.2	no	3	0	0	1	0
CGN	cluster_57507n	B30.2	no	8	0.0027	0.0036	1.333	0.805131
CGN	cluster_57583n	B30.2	no	3	0	0	1	0
CGN	cluster_57761n	B30.2	no	4	0	0	1	0
CGN	cluster_58075n	B30.2	no	8	0	0	1	0
CGN	cluster_58496n	B30.2	no	4	0	0	1	0
CGN	cluster_59161n	B30.2	no	7	0	0	1	0
CGN	cluster_59247n	B30.2	no	8	0	0	1	0
CGN	cluster_60282n	B30.2	yes	8	0	0	1	0
CGN	cluster_60648n	B30.2	no	1	0	0	1	0
CGN	cluster_60650n	B30.2	no	6	0	0	1	0
CGN	cluster_60699n	B30.2	no	8	0	0	1	0
CGN	cluster_60838n	B30.2	no	4	0	0	1	0
CGN	cluster_60887n	B30.2	no	5	0.0039	0.0053	1.358	1.98564
CGN	cluster_61335n	B30.2	yes	2	0	0	1	0
CGN	cluster_61488nn	B30.2	no	5	0	0	1	0
CGN	cluster_61591n	B30.2	yes	1	0	0	1	0
CGN	cluster_63074n	B30.2	yes	1	0.0055	0.001	0.181	-1.0018
CGN	cluster_65217n	B30.2	yes	1	0.0111	0.0013	0.117	-2.00318
CGN	cluster_66834n	B30.2	no	5	0.0026	0.0036	1.384	1.89846
CGN	cluster_72397n	B30.2	no	4	0.0028	0.0013	0.464	-1.18029
CGN	cluster_75682n	B30.2	no	7	0	0	1	0
CGN	cluster_76757nn	B30.2	no	8	0	0	1	0
CGN	cluster_77250n	B30.2	yes	7	0.0011	0.0002	0.181	-1.16221
CGN	cluster_77747nn	B30.2	yes	2	0	0	1	0
CGN	cluster_82752n	B30.2	yes	6	0	0	1	0
CGN	cluster_83602n	B30.2	no	1	0	0	1	0
CGN	cluster_84498n	B30.2	no	1	0	0	1	0
CGN	cluster_85992nn	B30.2	yes	3	0	0	1	0
CGN	cluster_90900nn	B30.2	yes	6	0	0	1	0
CGN	cluster_111355nn	B30.2	no	1	0	0	1	0
CGN	cluster_122905n	B30.2	no	6	0	0	1	0
CGN	cluster_125717nn	B30.2	yes	6	0	0	1	0
CGN	cluster_138220nn	B30.2	yes	8	0	0	1	0
DP	cluster_4	B30.2	no	2	0.0181	0.0072	0.397	-0.249313
DP	cluster_6	B30.2	no	19	0.011	0.0066	0.6	-1.31883
DP	cluster_40	B30.2	yes	1	0.0055	0.0004	0.072	-1.40011
DP	cluster_42	B30.2	no	1	0.0055	0.0002	0.036	-1.69247
DP	cluster_44	B30.2	no	6	0.0018	0.0007	0.388	-0.959303
DP	cluster_49	B30.2	no	5	0.013	0.0084	0.646	-0.506706
DP	cluster_60	B30.2	no	8	0.0011	0.0003	0.272	-1.10565
DP	cluster_63	B30.2	yes	1	0.0166	0.0012	0.072	-1.97328
DP	cluster_65	B30.2	no	11	0.006	0.0071	1.183	1.12835
DP	cluster_67	B30.2	no	5	0.0058	0.0015	0.258	-1.7507
DP	cluster_80	B30.2	no	15	0.0042	0.0031	0.738	-0.555739
DP	cluster_82	B30.2	no	2	0.009	0.0016	0.177	-1.6634
DP	cluster_84	B30.2	yes	4	0.0057	0.0031	0.543	-0.251305
DP	cluster_88	B30.2	yes	12	0.0109	0.0052	0.477	-1.5626
DP	cluster_89	B30.2	yes	3	0.0056	0.0023	0.41	-0.643685
DP	cluster_95	B30.2	yes	6	0.0098	0.0047	0.479	-1.04789
DP	cluster_98	B30.2	no	2	0	0	1	0
DP	cluster_403	B30.2	no	2	0.009	0.0034	0.377	-0.377561
DP	cluster_405	B30.2	no	1	0	0	1	0
DP	cluster_416	B30.2	yes	1	0.0166	0.0009	0.054	-2.20435
DP	cluster_419	B30.2	yes	5	0.0032	0.0018	0.562	-0.330126
DP	cluster_427	B30.2	no	1	0	0	1	0
DP	cluster_436n	B30.2	yes	3	0.0129	0.0035	0.271	-1.57639
DP	cluster_449	B30.2	no	8	0.0022	0.0012	0.545	-0.633536
DP	cluster_458n	B30.2	yes	1	0	0	1	0
DP	cluster_498	B30.2	no	1	0	0	1	0
DP	cluster_564n	B30.2	no	5	0.015	0.0055	0.366	-1.49485
DP	cluster_607	B30.2	no	5	0.0019	0.0009	0.473	-0.585082
DP	cluster_630	B30.2	yes	5	0.0026	0.0003	0.115	-1.86017
DP	cluster_659	B30.2	no	18	0	0	1	0
DP	cluster_673	B30.2	no	7	0.0203	0.0155	0.763	0.0501779
DP	cluster_691	B30.2	no	15	0	0	1	0
DP	cluster_692	B30.2	no	17	0.0076	0.0074	0.973	0.0356084
DP	cluster_698	B30.2	no	5	0	0	1	0
DP	cluster_804	B30.2	no	1	0.0074	0.002	0.27	0.406185
DP	cluster_807	B30.2	no	4	0.0092	0.0057	0.619	0.00363554
DP	cluster_810	B30.2	no	1	0	0	1	0
DP	cluster_811	B30.2	no	4	0.0021	0.0005	0.238	-1.27639
DP	cluster_867	B30.2	yes	11	0.0071	0.0058	0.816	-0.161176
DP	cluster_880	B30.2	no	8	0.0184	0.0213	1.157	1.93262
DP	cluster_881	B30.2	yes	9	0	0	1	0
DP	cluster_882	B30.2	yes	7	0.0011	0.0009	0.818	0.0821839
DP	cluster_883	B30.2	no	12	0.0094	0.0099	1.053	0.652065
DP	cluster_891	B30.2	yes	20	0.0074	0.0046	0.621	-1.22642
DP	cluster_958	B30.2	yes	7	0.0034	0.0017	0.5	-0.885678
DP	cluster_962n	B30.2	yes	1	0	0	1	0
DP	cluster_971n	B30.2	no	3	0	0	1	0
DP	cluster_982	B30.2	no	1	0.0222	0.004	0.18	-0.67749
DP	cluster_983	B30.2	no	4	0.0142	0.0098	0.69	0.414414
DP	cluster_986	B30.2	no	12	0.0128	0.0165	1.289	1.55596
DP	cluster_989	B30.2	no	3	0	0	1	0
DP	cluster_1028n	B30.2	yes	5	0	0	1	0
DP	cluster_1276n	B30.2	no	6	0	0	1	0
DP	cluster_1420n	B30.2	yes	2	0	0	1	0
DP	cluster_1432n	B30.2	yes	2	0	0	1	0
DP	cluster_1488n	B30.2	no	9	0	0	1	0
DP	cluster_1583n	B30.2	yes	3	0	0	1	0
DP	cluster_1636n	B30.2	no	1	0	0	1	0
DP	cluster_1669n	B30.2	yes	8	0	0	1	0
DP	cluster_2359n	B30.2	yes	4	0	0	1	0
DP	cluster_2616n	B30.2	no	6	0	0	1	0
DP	cluster_2695n	B30.2	no	5	0	0	1	0
DP	cluster_2737n	B30.2	no	7	0	0	1	0
DP	cluster_2798n	B30.2	no	4	0	0	1	0
DP	cluster_2801n	B30.2	no	1	0	0	1	0
DP	cluster_2851n	B30.2	no	8	0	0	1	0
DP	cluster_2912n	B30.2	no	2	0	0	1	0
DP	cluster_3113n	B30.2	no	1	0	0	1	0
DP	cluster_3172n	B30.2	yes	13	0	0	1	0
DP	cluster_3234nn	B30.2	yes	3	0	0	1	0
DP	cluster_3361n	B30.2	no	3	0	0	1	0
DP	cluster_3402n	B30.2	yes	1	0	0	1	0
DP	cluster_3443n	B30.2	no	4	0	0	1	0
DP	cluster_3472nn	B30.2	no	1	0	0	1	0
DP	cluster_3489n	B30.2	no	3	0	0	1	0
DP	cluster_3551n	B30.2	no	1	0	0	1	0
DP	cluster_3572n	B30.2	yes	1	0	0	1	0
DP	cluster_3663n	B30.2	no	2	0	0	1	0
DP	cluster_3947n	B30.2	yes	5	0	0	1	0
DP	cluster_4009	B30.2	no	18	0.0049	0.0065	1.326	0.786513
DP	cluster_4024n	B30.2	yes	3	0.0072	0.0028	0.388	-0.765647
DP	cluster_4043	B30.2	yes	1	0.0037	0.0006	0.162	-0.4222
DP	cluster_4045	B30.2	no	1	0.0166	0.0018	0.108	-1.54424
DP	cluster_4048	B30.2	no	4	0.0085	0.0034	0.4	-1.04001
DP	cluster_4050	B30.2	no	8	0	0	1	0
DP	cluster_4120	B30.2	no	4	0.0057	0.0053	0.929	1.50277
DP	cluster_4121	B30.2	no	1	0	0	1	0
DP	cluster_4163	B30.2	no	1	0.0129	0.0011	0.085	-1.7065
DP	cluster_4174	B30.2	no	12	0.0039	0.0059	1.512	1.98274
DP	cluster_4175	B30.2	no	6	0.0245	0.0089	0.363	-1.71796
DP	cluster_4181	B30.2	no	4	0	0	1	0
DP	cluster_4182	B30.2	no	1	0	0	1	0
DP	cluster_4211	B30.2	yes	1	0.0092	0.0004	0.043	-1.99235
DP	cluster_4294	B30.2	yes	6	0.0098	0.0048	0.489	-0.981204
DP	cluster_4409	B30.2	no	1	0.0074	0.0028	0.378	1.52137
DP	cluster_4412	B30.2	yes	7	0.0075	0.0063	0.84	0.379001
DP	cluster_4438nn	B30.2	yes	1	0.0037	0.0001	0.027	-1.46605
DP	cluster_4441	B30.2	yes	2	0.008	0.0025	0.312	-0.80015
DP	cluster_4803	B30.2	yes	1	0.0185	0.0044	0.237	0.0842079
DP	cluster_4813	B30.2	yes	4	0.0078	0.0016	0.205	-1.97331
DP	cluster_4821	B30.2	no	2	0	0	1	0
DP	cluster_4849	B30.2	no	3	0.0048	0.0019	0.395	-0.734134
DP	cluster_4851	B30.2	yes	1	0.0166	0.0008	0.048	-2.30086
DP	cluster_4867	B30.2	yes	1	0.0018	0.0001	0.055	-1.09133
DP	cluster_4870	B30.2	yes	1	0.0185	0.0009	0.048	-2.34815
DP	cluster_4895	B30.2	yes	1	0	0	1	0
DP	cluster_4917	B30.2	no	6	0	0	1	0
DP	cluster_5903nn	B30.2	yes	6	0.0073	0.0051	0.698	-0.0646829
DP	cluster_5970n	B30.2	no	4	0.0092	0.0027	0.293	-1.62248
DP	cluster_5992nn	B30.2	no	1	0	0	1	0
DP	cluster_6009	B30.2	yes	1	0.0222	0.0035	0.157	-1.12045
DP	cluster_6024	B30.2	yes	1	0.0092	0.0012	0.13	-1.12922
DP	cluster_6027	B30.2	yes	1	0.0185	0.0033	0.178	-0.671765
DP	cluster_6054	B30.2	no	5	0.0065	0.0022	0.338	-1.4469
DP	cluster_6066	B30.2	no	3	0	0	1	0
DP	cluster_6072	B30.2	no	7	0.0157	0.0168	1.07	1.27582
DP	cluster_6073	B30.2	yes	2	0	0	1	0
DP	cluster_6083	B30.2	no	2	0.0111	0.0012	0.108	-2.2191
DP	cluster_6257n	B30.2	no	1	0	0	1	0
DP	cluster_6325	B30.2	no	4	0	0	1	0
DP	cluster_6327	B30.2	yes	2	0.003	0.0006	0.2	-1.05353
DP	cluster_6338	B30.2	no	1	0	0	1	0
DP	cluster_6375	B30.2	no	1	0.024	0.0043	0.179	-0.715359
DP	cluster_6377	B30.2	yes	4	0	0	1	0
DP	cluster_6378	B30.2	no	10	0.0026	0.0008	0.307	-1.59326
DP	cluster_6383	B30.2	yes	4	0.0014	0.0007	0.5	-0.261043
DP	cluster_6539	B30.2	no	1	0.0648	0.0061	0.094	-2.09185
DP	cluster_6560	B30.2	no	1	0	0	1	0
DP	cluster_6575	B30.2	no	7	0.0058	0.0035	0.603	-0.521579
DP	cluster_6760	B30.2	yes	5	0.0039	0.0009	0.23	-1.71326
DP	cluster_6797	B30.2	no	1	0	0	1	0
DP	cluster_6803n	B30.2	no	3	0	0	1	0
DP	cluster_6915	B30.2	no	1	0.0092	0.0007	0.076	-1.69346
DP	cluster_6916	B30.2	no	4	0.0107	0.0023	0.214	-2.03882
DP	cluster_6932	B30.2	yes	1	0.0407	0.0038	0.093	-1.98112
DP	cluster_6963	B30.2	yes	1	0.0425	0.0102	0.24	0.0828779
DP	cluster_6969	B30.2	no	1	0	0	1	0
DP	cluster_6987	B30.2	yes	2	0.0131	0.0017	0.129	-2.13772
DP	cluster_7454n	B30.2	yes	2	0	0	1	0
DP	cluster_7532nn	B30.2	no	6	0.0061	0.0055	0.901	0.787567
DP	cluster_8023	B30.2	yes	1	0	0	1	0
DP	cluster_8031	B30.2	no	2	0.003	0.0002	0.066	-1.71621
DP	cluster_8034	B30.2	no	17	0.004	0.0045	1.125	0.482457
DP	cluster_8050	B30.2	no	1	0.0222	0.0041	0.184	-0.614547
DP	cluster_8058	B30.2	no	2	0.0131	0.0052	0.396	-0.229713
DP	cluster_8110	B30.2	no	5	0.0085	0.0057	0.67	0.0130503
DP	cluster_8116	B30.2	no	6	0.0042	0.0047	1.119	1.56172
DP	cluster_8161	B30.2	no	2	0.0121	0.0018	0.148	-1.96574
DP	cluster_8171	B30.2	yes	1	0	0	1	0
DP	cluster_8186	B30.2	no	1	0	0	1	0
DP	cluster_8223	B30.2	no	3	0.0064	0.0034	0.531	-0.0543233
DP	cluster_8230	B30.2	yes	2	0.007	0.0015	0.214	-1.3192
DP	cluster_8608	B30.2	no	2	0.006	0.0006	0.1	-2.00383
DP	cluster_8621	B30.2	no	1	0	0	1	0
DP	cluster_8642	B30.2	no	4	0.0149	0.011	0.738	0.647194
DP	cluster_8667	B30.2	yes	1	0	0	1	0
DP	cluster_8676	B30.2	yes	5	0.0039	0.0024	0.615	-0.179445
DP	cluster_8849	B30.2	no	6	0	0	1	0
DP	cluster_8919	B30.2	yes	19	0	0	1	0
DP	cluster_9440n	B30.2	yes	1	0.0111	0.0008	0.072	-1.75435
DP	cluster_9504	B30.2	yes	3	0.0008	0.0005	0.625	0.444318
DP	cluster_9546	B30.2	no	1	0	0	1	0
DP	cluster_9565	B30.2	yes	6	0.0018	0.001	0.555	-0.472044
DP	cluster_9734n	B30.2	no	1	0.0092	0.0004	0.043	-1.97572
DP	cluster_9807	B30.2	no	1	0.0055	0.0002	0.036	-1.71621
DP	cluster_9817	B30.2	no	1	0.0037	0.0003	0.081	-1.08842
DP	cluster_9829	B30.2	yes	1	0.0185	0.0078	0.421	2.40647
DP	cluster_9830	B30.2	yes	1	0	0	1	0
DP	cluster_9833	B30.2	yes	3	0.0267	0.0104	0.389	-1.04355
DP	cluster_9847	B30.2	no	2	0.0131	0.0044	0.335	-0.682746
DP	cluster_9866	B30.2	no	3	0	0	1	0
DP	cluster_9871	B30.2	no	1	0.0203	0.0026	0.128	-1.38138
DP	cluster_10035n	B30.2	no	6	0	0	1	0
DP	cluster_10633n	B30.2	yes	2	0	0	1	0
DP	cluster_11425n	B30.2	yes	7	0	0	1	0
DP	cluster_11607n	B30.2	yes	1	0	0	1	0
DP	cluster_11959n	B30.2	no	1	0	0	1	0
DP	cluster_12784n	B30.2	yes	1	0	0	1	0
DP	cluster_13292n	B30.2	yes	1	0	0	1	0
DP	cluster_13409n	B30.2	yes	1	0	0	1	0
DP	cluster_13556n	B30.2	no	5	0	0	1	0
DP	cluster_13674n	B30.2	yes	1	0	0	1	0
DP	cluster_13683n	B30.2	no	1	0	0	1	0
DP	cluster_13792n	B30.2	no	4	0	0	1	0
DP	cluster_13815n	B30.2	no	18	0	0	1	0
DP	cluster_13961n	B30.2	yes	1	0	0	1	0
DP	cluster_14002n	B30.2	yes	2	0	0	1	0
DP	cluster_14061n	B30.2	yes	1	0	0	1	0
DP	cluster_14095n	B30.2	no	1	0	0	1	0
DP	cluster_14302n	B30.2	no	1	0	0	1	0
DP	cluster_14745n	B30.2	yes	1	0	0	1	0
DP	cluster_14750n	B30.2	yes	1	0	0	1	0
DP	cluster_15055n	B30.2	yes	1	0	0	1	0
DP	cluster_15092n	B30.2	no	9	0	0	1	0
DP	cluster_15139n	B30.2	no	3	0	0	1	0
DP	cluster_15267n	B30.2	no	1	0	0	1	0
DP	cluster_15338n	B30.2	yes	2	0	0	1	0
DP	cluster_15477n	B30.2	yes	1	0	0	1	0
DP	cluster_15634n	B30.2	yes	6	0	0	1	0
DP	cluster_15889n	B30.2	yes	6	0	0	1	0
DP	cluster_16654n	B30.2	yes	10	0	0	1	0
DP	cluster_17997n	B30.2	no	7	0	0	1	0
DP	cluster_18042n	B30.2	yes	2	0	0	1	0
DP	cluster_18071n	B30.2	no	7	0	0	1	0
DP	cluster_18295n	B30.2	no	1	0	0	1	0
DP	cluster_18675n	B30.2	no	1	0	0	1	0
DP	cluster_18836n	B30.2	yes	2	0	0	1	0
DP	cluster_19223n	B30.2	yes	5	0	0	1	0
DP	cluster_19628n	B30.2	no	12	0	0	1	0
DP	cluster_19700n	B30.2	no	1	0	0	1	0
DP	cluster_19915n	B30.2	yes	2	0	0	1	0
DP	cluster_19966n	B30.2	no	2	0	0	1	0
DP	cluster_19977n	B30.2	yes	1	0	0	1	0
DP	cluster_20376n	B30.2	no	10	0	0	1	0
DP	cluster_20583n	B30.2	yes	2	0	0	1	0
DP	cluster_20697n	B30.2	no	1	0	0	1	0
DP	cluster_21480n	B30.2	yes	9	0	0	1	0
DP	cluster_21557n	B30.2	yes	5	0	0	1	0
DP	cluster_21585n	B30.2	no	5	0	0	1	0
DP	cluster_21687n	B30.2	yes	8	0	0	1	0
DP	cluster_21804n	B30.2	no	2	0	0	1	0
DP	cluster_22135n	B30.2	no	9	0	0	1	0
DP	cluster_22221n	B30.2	yes	1	0	0	1	0
DP	cluster_22555nn	B30.2	yes	3	0	0	1	0
DP	cluster_22757n	B30.2	no	1	0	0	1	0
DP	cluster_23057n	B30.2	no	12	0	0	1	0
DP	cluster_23066n	B30.2	no	6	0	0	1	0
DP	cluster_23115n	B30.2	no	1	0	0	1	0
DP	cluster_23139n	B30.2	yes	4	0	0	1	0
DP	cluster_23215n	B30.2	yes	3	0	0	1	0
DP	cluster_23225n	B30.2	no	19	0	0	1	0
DP	cluster_23297n	B30.2	yes	1	0	0	1	0
DP	cluster_23313n	B30.2	no	10	0	0	1	0
DP	cluster_23327n	B30.2	yes	6	0	0	1	0
DP	cluster_23333n	B30.2	yes	5	0	0	1	0
DP	cluster_23365n	B30.2	no	1	0	0	1	0
DP	cluster_23409n	B30.2	yes	3	0	0	1	0
DP	cluster_23440n	B30.2	no	6	0	0	1	0
DP	cluster_23579n	B30.2	no	1	0	0	1	0
DP	cluster_23585n	B30.2	no	13	0	0	1	0
DP	cluster_23589n	B30.2	no	9	0	0	1	0
DP	cluster_23741n	B30.2	no	4	0	0	1	0
DP	cluster_23761n	B30.2	no	4	0	0	1	0
DP	cluster_23859n	B30.2	no	4	0	0	1	0
DP	cluster_23902n	B30.2	no	2	0	0	1	0
DP	cluster_23916n	B30.2	no	11	0	0	1	0
DP	cluster_23917n	B30.2	no	7	0	0	1	0
DP	cluster_23945n	B30.2	yes	5	0	0	1	0
DP	cluster_23947n	B30.2	yes	5	0	0	1	0
DP	cluster_23960n	B30.2	no	1	0	0	1	0
DP	cluster_23989n	B30.2	yes	8	0	0	1	0
DP	cluster_23999n	B30.2	yes	1	0	0	1	0
DP	cluster_24012n	B30.2	no	5	0	0	1	0
DP	cluster_24206n	B30.2	no	7	0	0	1	0
DP	cluster_24229n	B30.2	no	11	0	0	1	0
DP	cluster_24253n	B30.2	no	8	0	0	1	0
DP	cluster_24487n	B30.2	no	9	0	0	1	0
DP	cluster_24605n	B30.2	no	4	0	0	1	0
DP	cluster_24617n	B30.2	yes	6	0	0	1	0
DP	cluster_24647n	B30.2	no	9	0	0	1	0
DP	cluster_24657n	B30.2	yes	9	0	0	1	0
DP	cluster_24707n	B30.2	no	2	0	0	1	0
DP	cluster_24733n	B30.2	yes	7	0	0	1	0
DP	cluster_24842n	B30.2	yes	3	0	0	1	0
DP	cluster_24904n	B30.2	no	11	0	0	1	0
DP	cluster_24907n	B30.2	no	7	0	0	1	0
DP	cluster_24913n	B30.2	yes	9	0	0	1	0
DP	cluster_24952n	B30.2	no	2	0	0	1	0
DP	cluster_24954n	B30.2	no	4	0	0	1	0
DP	cluster_24978n	B30.2	no	3	0	0	1	0
DP	cluster_24998n	B30.2	no	6	0	0	1	0
DP	cluster_25015n	B30.2	no	12	0	0	1	0
DP	cluster_25065n	B30.2	no	10	0	0	1	0
DP	cluster_25098n	B30.2	yes	6	0	0	1	0
DP	cluster_25137n	B30.2	no	8	0	0	1	0
DP	cluster_25194n	B30.2	yes	17	0	0	1	0
DP	cluster_25279n	B30.2	no	5	0	0	1	0
DP	cluster_25283n	B30.2	yes	4	0	0	1	0
DP	cluster_25306n	B30.2	yes	1	0	0	1	0
DP	cluster_25353n	B30.2	yes	1	0	0	1	0
DP	cluster_25394n	B30.2	yes	10	0	0	1	0
DP	cluster_25463n	B30.2	yes	2	0	0	1	0
DP	cluster_25466n	B30.2	yes	18	0	0	1	0
DP	cluster_25558n	B30.2	no	2	0	0	1	0
DP	cluster_25592n	B30.2	no	15	0	0	1	0
DP	cluster_25815n	B30.2	no	14	0	0	1	0
DP	cluster_25843n	B30.2	no	14	0	0	1	0
DP	cluster_25891n	B30.2	no	8	0	0	1	0
DP	cluster_25896n	B30.2	yes	4	0	0	1	0
DP	cluster_25959n	B30.2	yes	20	0	0	1	0
DP	cluster_25966n	B30.2	yes	4	0	0	1	0
DP	cluster_26063n	B30.2	no	7	0	0	1	0
DP	cluster_26081n	B30.2	yes	2	0	0	1	0
DP	cluster_26085n	B30.2	yes	1	0	0	1	0
DP	cluster_26152n	B30.2	no	9	0	0	1	0
DP	cluster_26162n	B30.2	yes	1	0	0	1	0
DP	cluster_26171n	B30.2	no	5	0	0	1	0
DP	cluster_26184n	B30.2	no	7	0	0	1	0
DP	cluster_26209n	B30.2	no	1	0	0	1	0
DP	cluster_26249n	B30.2	yes	12	0	0	1	0
DP	cluster_26309n	B30.2	no	2	0	0	1	0
DP	cluster_26417n	B30.2	no	6	0	0	1	0
DP	cluster_26428n	B30.2	no	6	0	0	1	0
DP	cluster_26462n	B30.2	no	5	0	0	1	0
DP	cluster_26511n	B30.2	yes	5	0	0	1	0
DP	cluster_26566n	B30.2	no	4	0	0	1	0
DP	cluster_26729n	B30.2	no	6	0	0	1	0
DP	cluster_26787n	B30.2	yes	1	0	0	1	0
DP	cluster_26912n	B30.2	yes	10	0	0	1	0
DP	cluster_26917n	B30.2	yes	8	0	0	1	0
DP	cluster_26921n	B30.2	no	13	0	0	1	0
DP	cluster_26955n	B30.2	yes	5	0	0	1	0
DP	cluster_27009n	B30.2	yes	12	0	0	1	0
DP	cluster_27139n	B30.2	yes	2	0	0	1	0
DP	cluster_27192n	B30.2	no	1	0	0	1	0
DP	cluster_27331n	B30.2	no	2	0	0	1	0
DP	cluster_27342n	B30.2	no	4	0	0	1	0
DP	cluster_27350n	B30.2	no	4	0	0	1	0
DP	cluster_27366n	B30.2	no	7	0	0	1	0
DP	cluster_27369n	B30.2	no	2	0	0	1	0
DP	cluster_27641n	B30.2	yes	3	0	0	1	0
DP	cluster_27646n	B30.2	yes	4	0	0	1	0
DP	cluster_27647n	B30.2	no	6	0	0	1	0
DP	cluster_27896n	B30.2	no	3	0	0	1	0
DP	cluster_28071n	B30.2	no	5	0	0	1	0
DP	cluster_28103n	B30.2	yes	2	0	0	1	0
DP	cluster_28143n	B30.2	yes	6	0	0	1	0
DP	cluster_28164n	B30.2	yes	3	0	0	1	0
DP	cluster_28310n	B30.2	yes	5	0	0	1	0
DP	cluster_28404n	B30.2	no	13	0	0	1	0
DP	cluster_28475n	B30.2	yes	1	0	0	1	0
DP	cluster_28643n	B30.2	yes	6	0	0	1	0
DP	cluster_28670n	B30.2	no	6	0	0	1	0
DP	cluster_28938n	B30.2	no	1	0	0	1	0
DP	cluster_29103n	B30.2	no	5	0	0	1	0
DP	cluster_29500n	B30.2	yes	2	0	0	1	0
DP	cluster_29507n	B30.2	no	12	0	0	1	0
DP	cluster_29533n	B30.2	no	6	0	0	1	0
DP	cluster_29543n	B30.2	yes	4	0	0	1	0
DP	cluster_29701n	B30.2	no	1	0	0	1	0
DP	cluster_30016n	B30.2	yes	3	0	0	1	0
DP	cluster_30224n	B30.2	yes	5	0	0	1	0
DP	cluster_30225n	B30.2	yes	2	0	0	1	0
DP	cluster_30267n	B30.2	no	2	0	0	1	0
DP	cluster_30397n	B30.2	yes	6	0	0	1	0
DP	cluster_30443n	B30.2	yes	8	0	0	1	0
DP	cluster_30572n	B30.2	no	1	0	0	1	0
DP	cluster_30587n	B30.2	yes	1	0	0	1	0
DP	cluster_30676n	B30.2	yes	4	0	0	1	0
DP	cluster_30786n	B30.2	no	1	0	0	1	0
DP	cluster_30911n	B30.2	no	1	0	0	1	0
DP	cluster_31181n	B30.2	no	6	0	0	1	0
DP	cluster_31204n	B30.2	yes	1	0	0	1	0
DP	cluster_31319n	B30.2	yes	6	0	0	1	0
DP	cluster_31322n	B30.2	yes	1	0	0	1	0
DP	cluster_31386n	B30.2	yes	4	0	0	1	0
DP	cluster_31417n	B30.2	no	1	0	0	1	0
DP	cluster_31660n	B30.2	no	4	0	0	1	0
DP	cluster_31676n	B30.2	yes	2	0	0	1	0
DP	cluster_31717n	B30.2	no	1	0	0	1	0
DP	cluster_31740n	B30.2	no	4	0	0	1	0
DP	cluster_31971n	B30.2	yes	1	0	0	1	0
DP	cluster_32002n	B30.2	yes	3	0	0	1	0
DP	cluster_32017n	B30.2	yes	16	0	0	1	0
DP	cluster_32272n	B30.2	yes	4	0	0	1	0
DP	cluster_32446n	B30.2	yes	3	0	0	1	0
DP	cluster_32475n	B30.2	no	1	0	0	1	0
DP	cluster_32535n	B30.2	yes	3	0	0	1	0
DP	cluster_32586n	B30.2	yes	3	0	0	1	0
DP	cluster_32683n	B30.2	no	2	0	0	1	0
DP	cluster_32703n	B30.2	no	1	0	0	1	0
DP	cluster_32728n	B30.2	yes	3	0	0	1	0
DP	cluster_33093n	B30.2	no	2	0	0	1	0
DP	cluster_33096n	B30.2	no	1	0	0	1	0
DP	cluster_33102n	B30.2	no	10	0	0	1	0
DP	cluster_33207n	B30.2	no	2	0	0	1	0
DP	cluster_33283n	B30.2	no	3	0	0	1	0
DP	cluster_33407n	B30.2	no	13	0	0	1	0
DP	cluster_33598n	B30.2	yes	2	0	0	1	0
DP	cluster_33641n	B30.2	no	10	0	0	1	0
DP	cluster_33877n	B30.2	no	2	0	0	1	0
DP	cluster_33887n	B30.2	yes	3	0	0	1	0
DP	cluster_33899n	B30.2	no	1	0	0	1	0
DP	cluster_33917n	B30.2	yes	4	0	0	1	0
DP	cluster_34013n	B30.2	yes	5	0	0	1	0
DP	cluster_34215n	B30.2	no	4	0	0	1	0
DP	cluster_34231n	B30.2	yes	1	0	0	1	0
DP	cluster_34384n	B30.2	yes	1	0	0	1	0
DP	cluster_34406n	B30.2	yes	1	0	0	1	0
DP	cluster_34409n	B30.2	yes	2	0	0	1	0
DP	cluster_34427n	B30.2	yes	2	0	0	1	0
DP	cluster_34541n	B30.2	yes	1	0	0	1	0
DP	cluster_34779n	B30.2	no	2	0	0	1	0
DP	cluster_34786n	B30.2	yes	2	0	0	1	0
DP	cluster_34817n	B30.2	yes	4	0	0	1	0
DP	cluster_34863n	B30.2	yes	3	0	0	1	0
DP	cluster_35026n	B30.2	no	6	0	0	1	0
DP	cluster_35235n	B30.2	yes	1	0	0	1	0
DP	cluster_35348n	B30.2	yes	2	0	0	1	0
DP	cluster_35386n	B30.2	no	16	0	0	1	0
DP	cluster_35396n	B30.2	yes	3	0	0	1	0
DP	cluster_35437n	B30.2	yes	6	0	0	1	0
DP	cluster_35571n	B30.2	no	3	0	0	1	0
DP	cluster_35668n	B30.2	yes	11	0	0	1	0
DP	cluster_35874n	B30.2	no	8	0	0	1	0
DP	cluster_35900n	B30.2	yes	3	0	0	1	0
DP	cluster_35918n	B30.2	no	7	0	0	1	0
DP	cluster_35997n	B30.2	yes	1	0	0	1	0
DP	cluster_36129n	B30.2	yes	7	0	0	1	0
DP	cluster_36218n	B30.2	yes	12	0	0	1	0
DP	cluster_36241n	B30.2	yes	1	0	0	1	0
DP	cluster_36329n	B30.2	no	6	0	0	1	0
DP	cluster_36432n	B30.2	no	12	0	0	1	0
DP	cluster_36509nn	B30.2	yes	1	0	0	1	0
DP	cluster_36594n	B30.2	no	20	0	0	1	0
DP	cluster_36722n	B30.2	no	5	0	0	1	0
DP	cluster_36724n	B30.2	no	2	0	0	1	0
DP	cluster_36737n	B30.2	yes	6	0	0	1	0
DP	cluster_36789n	B30.2	yes	1	0	0	1	0
DP	cluster_36936n	B30.2	no	6	0	0	1	0
DP	cluster_36949n	B30.2	no	5	0	0	1	0
DP	cluster_37024n	B30.2	no	5	0	0	1	0
DP	cluster_37274n	B30.2	no	19	0	0	1	0
DP	cluster_37383n	B30.2	yes	1	0	0	1	0
DP	cluster_37489n	B30.2	yes	1	0	0	1	0
DP	cluster_37557n	B30.2	yes	3	0	0	1	0
DP	cluster_37669n	B30.2	yes	13	0	0	1	0
DP	cluster_37777n	B30.2	no	1	0	0	1	0
DP	cluster_37935n	B30.2	no	9	0	0	1	0
DP	cluster_38105n	B30.2	no	15	0	0	1	0
DP	cluster_38235n	B30.2	no	7	0	0	1	0
DP	cluster_38285n	B30.2	no	1	0	0	1	0
DP	cluster_38353n	B30.2	no	1	0	0	1	0
DP	cluster_38369n	B30.2	no	1	0	0	1	0
DP	cluster_38450n	B30.2	no	3	0	0	1	0
DP	cluster_38513n	B30.2	no	3	0	0	1	0
DP	cluster_38525n	B30.2	yes	20	0	0	1	0
DP	cluster_38539n	B30.2	no	10	0	0	1	0
DP	cluster_38669n	B30.2	yes	11	0	0	1	0
DP	cluster_38686n	B30.2	no	1	0	0	1	0
DP	cluster_38782n	B30.2	no	5	0	0	1	0
DP	cluster_38820n	B30.2	no	2	0	0	1	0
DP	cluster_39000n	B30.2	no	4	0	0	1	0
DP	cluster_39052n	B30.2	yes	2	0	0	1	0
DP	cluster_39096n	B30.2	no	1	0	0	1	0
DP	cluster_39206n	B30.2	yes	3	0	0	1	0
DP	cluster_39440n	B30.2	yes	4	0	0	1	0
DP	cluster_39447n	B30.2	yes	2	0	0	1	0
DP	cluster_39590n	B30.2	no	2	0	0	1	0
DP	cluster_39798n	B30.2	no	3	0	0	1	0
DP	cluster_39955n	B30.2	no	4	0	0	1	0
DP	cluster_40057n	B30.2	no	3	0	0	1	0
DP	cluster_40118n	B30.2	yes	6	0	0	1	0
DP	cluster_40179n	B30.2	yes	2	0.0323	0.0076	0.235	-1.57336
DP	cluster_40520n	B30.2	yes	2	0	0	1	0
DP	cluster_40867n	B30.2	no	5	0.0065	0.0047	0.723	0.177331
DP	cluster_40879n	B30.2	no	9	0	0	1	0
DP	cluster_40919n	B30.2	yes	1	0	0	1	0
DP	cluster_40957n	B30.2	yes	4	0.0035	0.0022	0.628	0.0523275
DP	cluster_41030n	B30.2	yes	4	0.0085	0.0044	0.517	-0.472455
DP	cluster_41098n	B30.2	yes	2	0.001	0.0003	0.3	-0.197388
DP	cluster_41178n	B30.2	no	2	0	0	1	0
DP	cluster_41318n	B30.2	yes	3	0.0121	0.0043	0.355	-1.07193
DP	cluster_41352n	B30.2	no	7	0	0	1	0
DP	cluster_41481n	B30.2	yes	4	0.0007	0.0004	0.571	0.134817
DP	cluster_41534n	B30.2	yes	4	0.0014	0.0006	0.428	-0.422738
DP	cluster_41767n	B30.2	no	8	0.0083	0.0082	0.987	0.787553
DP	cluster_41793n	B30.2	no	1	0.0018	0.0001	0.055	-0.806609
DP	cluster_41798n	B30.2	no	1	0	0	1	0
DP	cluster_41850n	B30.2	no	8	0.0044	0.005	1.136	1.22082
DP	cluster_41909n	B30.2	no	7	0	0	1	0
DP	cluster_42008n	B30.2	no	1	0	0	1	0
DP	cluster_42030n	B30.2	no	3	0.0056	0.0035	0.625	0.411277
DP	cluster_42237n	B30.2	no	1	0.0055	0.001	0.181	-0.415034
DP	cluster_42275n	B30.2	no	2	0.001	0	0	-1.10856
DP	cluster_42344n	B30.2	no	1	0	0	1	0
DP	cluster_42467n	B30.2	no	1	0	0	1	0
DP	cluster_42471n	B30.2	no	1	0.0037	0.0002	0.054	-1.44327
DP	cluster_42514n	B30.2	yes	1	0.0055	0.0002	0.036	-1.6837
DP	cluster_42587n	B30.2	yes	8	0.0005	0.0001	0.2	-1.07214
DP	cluster_42765n	B30.2	no	2	0	0	1	0
DP	cluster_42790n	B30.2	no	6	0	0	1	0
DP	cluster_42833n	B30.2	no	18	0	0	1	0
DP	cluster_42909n	B30.2	yes	5	0	0	1	0
DP	cluster_42949n	B30.2	yes	1	0	0	1	0
DP	cluster_42982n	B30.2	yes	4	0.0049	0.0026	0.53	-0.499594
DP	cluster_43053n	B30.2	no	13	0.0019	0.0019	1	0.311691
DP	cluster_43098n	B30.2	no	5	0.0098	0.0032	0.326	-1.59899
DP	cluster_43155n	B30.2	no	1	0.0037	0.0003	0.081	-1.02377
DP	cluster_43176n	B30.2	yes	1	0.0055	0.0004	0.072	-1.423
DP	cluster_43208n	B30.2	yes	4	0.0121	0.0089	0.735	0.635431
DP	cluster_43243n	B30.2	no	13	0	0	1	0
DP	cluster_43293n	B30.2	yes	2	0	0	1	0
DP	cluster_43312n	B30.2	no	17	0	0	1	0
DP	cluster_43409n	B30.2	yes	1	0.0018	0.0005	0.277	0.228641
DP	cluster_43653n	B30.2	no	8	0	0	1	0
DP	cluster_43968n	B30.2	yes	5	0.0072	0.0011	0.152	-2.30516
DP	cluster_43998n	B30.2	yes	1	0.0074	0.0003	0.04	-1.87967
DP	cluster_44064n	B30.2	yes	3	0.004	0.001	0.25	-1.30129
DP	cluster_44163n	B30.2	no	7	0	0	1	0
DP	cluster_44353n	B30.2	no	2	0.009	0.0064	0.711	1.86427
DP	cluster_44775n	B30.2	no	6	0.0067	0.0038	0.567	-0.826113
DP	cluster_44955n	B30.2	yes	2	0.0111	0.0014	0.126	-2.11078
DP	cluster_45309n	B30.2	no	1	0	0	1	0
DP	cluster_45388n	B30.2	yes	1	0	0	1	0
DP	cluster_45470n	B30.2	yes	7	0.0011	0.0015	1.363	1.5123
DP	cluster_45633n	B30.2	yes	1	0.0444	0.0084	0.189	-0.59826
DP	cluster_46225n	B30.2	yes	1	0.0203	0.0045	0.221	-0.168579
DP	cluster_46315n	B30.2	yes	10	0.0031	0.0005	0.161	-2.10096
DP	cluster_46337n	B30.2	yes	1	0	0	1	0
DP	cluster_46555n	B30.2	no	1	0	0	1	0
DP	cluster_46577n	B30.2	no	1	0	0	1	0
DP	cluster_46741n	B30.2	no	12	0.0024	0.0014	0.583	-0.888561
DP	cluster_46916n	B30.2	yes	11	0.0076	0.0035	0.46	-1.44239
DP	cluster_46995n	B30.2	no	2	0.007	0.0015	0.214	-1.36104
DP	cluster_47086n	B30.2	no	3	0	0	1	0
DP	cluster_47124n	B30.2	yes	1	0.0277	0.0016	0.057	-2.38103
DP	cluster_47404n	B30.2	no	5	0	0	1	0
DP	cluster_47472n	B30.2	no	7	0.0168	0.0149	0.886	0.539847
DP	cluster_47567n	B30.2	no	3	0	0	1	0
DP	cluster_47705n	B30.2	no	1	0.0074	0.0009	0.121	-1.08217
DP	cluster_47811n	B30.2	yes	5	0.0013	0.0008	0.615	-0.132602
DP	cluster_47827n	B30.2	yes	5	0.0026	0.0019	0.73	0.260917
DP	cluster_47896n	B30.2	no	3	0	0	1	0
DP	cluster_47903n	B30.2	yes	3	0.0008	0.0002	0.25	-0.521915
DP	cluster_47978n	B30.2	yes	5	0.0085	0.0039	0.458	-0.953318
DP	cluster_48279n	B30.2	yes	5	0.0045	0.0029	0.644	-0.0854998
DP	cluster_48390n	B30.2	yes	1	0.0037	0.0001	0.027	-1.48662
DP	cluster_48554n	B30.2	yes	2	0.002	0.0009	0.45	0.212356
DP	cluster_48621n	B30.2	no	5	0.0058	0.0043	0.741	0.27921
DP	cluster_48946n	B30.2	yes	3	0.0032	0.0004	0.125	-1.71304
DP	cluster_48964n	B30.2	yes	1	0.0037	0.0001	0.027	-1.47634
DP	cluster_49011n	B30.2	no	7	0	0	1	0
DP	cluster_49206n	B30.2	no	2	0.005	0.0009	0.18	-1.45303
DP	cluster_49239n	B30.2	yes	4	0.0114	0.0043	0.377	-1.22487
DP	cluster_49457n	B30.2	no	6	0	0	1	0
DP	cluster_49713n	B30.2	yes	3	0.0064	0.0017	0.265	-1.42662
DP	cluster_49833n	B30.2	no	8	0	0	1	0
DP	cluster_50213n	B30.2	no	1	0	0	1	0
DP	cluster_50237n	B30.2	no	3	0	0	1	0
DP	cluster_50295n	B30.2	no	1	0.0055	0.0003	0.054	-1.53886
DP	cluster_50374n	B30.2	no	7	0	0	1	0
DP	cluster_50402n	B30.2	yes	6	0.0024	0.0018	0.75	0.152622
DP	cluster_50476n	B30.2	no	3	0.0072	0.0015	0.208	-1.78628
DP	cluster_50657n	B30.2	no	1	0	0	1	0
DP	cluster_50741n	B30.2	yes	1	0	0	1	0
DP	cluster_50759n	B30.2	no	2	0	0	1	0
DP	cluster_50957n	B30.2	no	3	0	0	1	0
DP	cluster_51161n	B30.2	no	1	0	0	1	0
DP	cluster_51208n	B30.2	no	5	0.0078	0.0057	0.73	0.275711
DP	cluster_51332n	B30.2	no	3	0.0064	0.0022	0.343	-0.999453
DP	cluster_51567n	B30.2	no	2	0	0	1	0
DP	cluster_51615n	B30.2	no	1	0	0	1	0
DP	cluster_51624n	B30.2	no	7	0	0	1	0
DP	cluster_51669n	B30.2	no	1	0	0	1	0
DP	cluster_51801n	B30.2	no	2	0	0	1	0
DP	cluster_51823n	B30.2	no	7	0	0	1	0
DP	cluster_52061n	B30.2	no	1	0.0018	0.0002	0.111	-0.521915
DP	cluster_52262n	B30.2	no	4	0	0	1	0
DP	cluster_52286n	B30.2	no	2	0.0111	0.0027	0.243	-1.29956
DP	cluster_52298n	B30.2	yes	5	0.0078	0.0049	0.628	-0.171479
DP	cluster_52435n	B30.2	no	14	0	0	1	0
DP	cluster_52784n	B30.2	yes	1	0	0	1	0
DP	cluster_52821n	B30.2	yes	9	0.0043	0.0019	0.441	-1.26407
DP	cluster_53018n	B30.2	no	5	0.0072	0.0031	0.43	-1.05342
DP	cluster_53084n	B30.2	yes	7	0.0034	0.0015	0.441	-1.05718
DP	cluster_53150n	B30.2	yes	5	0.0039	0.0008	0.205	-1.77027
DP	cluster_53245n	B30.2	no	3	0	0	1	0
DP	cluster_53348n	B30.2	no	6	0	0	1	0
DP	cluster_53401n	B30.2	yes	8	0.005	0.0022	0.44	-1.22428
DP	cluster_53514n	B30.2	no	2	0	0	1	0
DP	cluster_53517n	B30.2	no	3	0.0178	0.0054	0.303	-1.4535
DP	cluster_53629n	B30.2	yes	2	0.007	0.002	0.285	-0.916865
DP	cluster_53817n	B30.2	no	4	0.0028	0.0014	0.5	-0.397002
DP	cluster_53859n	B30.2	yes	4	0.0042	0.0013	0.309	-1.27967
DP	cluster_54104n	B30.2	yes	4	0.0042	0.0006	0.142	-2.0558
DP	cluster_54459n	B30.2	no	1	0	0	1	0
DP	cluster_54553n	B30.2	no	10	0	0	1	0
DP	cluster_54851n	B30.2	yes	2	0.0161	0.0055	0.341	-0.654722
DP	cluster_54877n	B30.2	no	6	0.0055	0.0035	0.636	-0.297799
DP	cluster_55175n	B30.2	yes	1	0.0222	0.0022	0.099	-1.81341
DP	cluster_55446n	B30.2	yes	9	0.0032	0.0055	1.718	2.98556
DP	cluster_55565n	B30.2	no	2	0	0	1	0
DP	cluster_55713n	B30.2	no	4	0	0	1	0
DP	cluster_55733n	B30.2	no	7	0	0	1	0
DP	cluster_55891n	B30.2	yes	3	0.004	0.0005	0.125	-1.94432
DP	cluster_56009n	B30.2	no	1	0.037	0.0052	0.14	-1.31517
DP	cluster_56013n	B30.2	yes	1	0	0	1	0
DP	cluster_56024n	B30.2	yes	16	0	0	1	0
DP	cluster_56143n	B30.2	yes	3	0.0008	0.0001	0.125	-0.806609
DP	cluster_56195n	B30.2	no	2	0	0	1	0
DP	cluster_56269n	B30.2	no	4	0	0	1	0
DP	cluster_56305n	B30.2	no	1	0.0333	0.0063	0.189	-0.642648
DP	cluster_56525n	B30.2	yes	5	0	0	1	0
DP	cluster_56553n	B30.2	yes	14	0.0023	0.0004	0.173	-1.97572
DP	cluster_56831n	B30.2	no	5	0.0065	0.0048	0.738	0.326979
DP	cluster_57063n	B30.2	no	7	0.004	0.0021	0.525	-0.823606
DP	cluster_57105n	B30.2	no	1	0	0	1	0
DP	cluster_57396n	B30.2	yes	1	0	0	1	0
DP	cluster_57507n	B30.2	no	20	0.0026	0.0014	0.538	-1.22033
DP	cluster_57583n	B30.2	no	3	0	0	1	0
DP	cluster_57681n	B30.2	no	2	0.0131	0.0046	0.351	-0.555862
DP	cluster_57761n	B30.2	no	1	0.0074	0.002	0.27	0.370392
DP	cluster_58075n	B30.2	no	12	0	0	1	0
DP	cluster_58093n	B30.2	no	1	0.0277	0.0041	0.148	-1.14545
DP	cluster_58108n	B30.2	yes	3	0	0	1	0
DP	cluster_58496n	B30.2	no	5	0	0	1	0
DP	cluster_59161n	B30.2	no	19	0	0	1	0
DP	cluster_59247n	B30.2	no	20	0	0	1	0
DP	cluster_59296n	B30.2	no	1	0.0018	0	0	-1.12411
DP	cluster_59355n	B30.2	yes	1	0	0	1	0
DP	cluster_59621n	B30.2	no	1	0.0092	0.0005	0.054	-1.89587
DP	cluster_59771n	B30.2	yes	6	0	0	1	0
DP	cluster_60009n	B30.2	no	6	0	0	1	0
DP	cluster_60282n	B30.2	yes	18	0	0	1	0
DP	cluster_60333n	B30.2	yes	10	0	0	1	0
DP	cluster_60507n	B30.2	yes	6	0.0042	0.002	0.476	-0.92027
DP	cluster_60554n	B30.2	yes	1	0	0	1	0
DP	cluster_60608n	B30.2	yes	1	0	0	1	0
DP	cluster_60648n	B30.2	no	5	0	0	1	0
DP	cluster_60650n	B30.2	no	2	0	0	1	0
DP	cluster_60699n	B30.2	no	20	0	0	1	0
DP	cluster_60838n	B30.2	no	1	0	0	1	0
DP	cluster_60887n	B30.2	no	14	0.0014	0.0019	1.357	1.13052
DP	cluster_60979n	B30.2	yes	8	0.0044	0.0023	0.522	-0.934145
DP	cluster_61001nn	B30.2	yes	1	0	0	1	0
DP	cluster_61074n	B30.2	no	1	0.0074	0.0003	0.04	-1.86017
DP	cluster_61075n	B30.2	yes	4	0.0164	0.0066	0.402	-1.12911
DP	cluster_61250n	B30.2	no	1	0	0	1	0
DP	cluster_61475nn	B30.2	yes	1	0	0	1	0
DP	cluster_61488nn	B30.2	no	14	0.0028	0.0014	0.5	-1.17076
DP	cluster_62306n	B30.2	yes	4	0.0057	0.0037	0.649	0.213667
DP	cluster_63074n	B30.2	yes	12	0.0049	0.0034	0.693	-0.661464
DP	cluster_63561n	B30.2	no	3	0	0	1	0
DP	cluster_65217n	B30.2	yes	13	0.0082	0.0059	0.719	-0.656758
DP	cluster_65310n	B30.2	yes	2	0.007	0.0017	0.242	-1.17808
DP	cluster_66309nn	B30.2	no	6	0	0	1	0
DP	cluster_67954nn	B30.2	yes	5	0.0026	0.0012	0.461	-0.616048
DP	cluster_68874n	B30.2	no	2	0	0	1	0
DP	cluster_71488n	B30.2	no	7	0.0005	0.0007	1.4	0.996929
DP	cluster_72397n	B30.2	no	5	0.0072	0.0035	0.486	-0.809049
DP	cluster_74859n	B30.2	yes	13	0.0053	0.0027	0.509	-1.33172
DP	cluster_75682n	B30.2	no	4	0	0	1	0
DP	cluster_76757nn	B30.2	no	17	0	0	1	0
DP	cluster_77250n	B30.2	yes	6	0.0024	0.0012	0.5	-0.708292
DP	cluster_77886nn	B30.2	yes	1	0	0	1	0
DP	cluster_78301n	B30.2	yes	6	0.0061	0.0036	0.59	-0.511764
DP	cluster_79779n	B30.2	no	20	0	0	1	0
DP	cluster_82752n	B30.2	yes	15	0.0046	0.0029	0.63	-0.968028
DP	cluster_83602n	B30.2	no	11	0	0	1	0
DP	cluster_84498n	B30.2	no	6	0	0	1	0
DP	cluster_85682nn	B30.2	no	7	0	0	1	0
DP	cluster_85992nn	B30.2	yes	12	0	0	1	0
DP	cluster_86533n	B30.2	no	1	0	0	1	0
DP	cluster_89688nn	B30.2	no	2	0	0	1	0
DP	cluster_90809n	B30.2	no	1	0	0	1	0
DP	cluster_90900nn	B30.2	yes	1	0.0296	0.0014	0.047	-2.53229
DP	cluster_94426nn	B30.2	yes	3	0	0	1	0
DP	cluster_95119n	B30.2	yes	9	0.0016	0.0006	0.375	-1.16065
DP	cluster_101771nn	B30.2	no	9	0	0	1	0
DP	cluster_108193nn	B30.2	yes	1	0	0	1	0
DP	cluster_111355nn	B30.2	no	7	0	0	1	0
DP	cluster_114999nn	B30.2	no	2	0	0	1	0
DP	cluster_122905n	B30.2	no	6	0	0	1	0
DP	cluster_125717nn	B30.2	yes	8	0	0	1	0
DP	cluster_133624nn	B30.2	yes	1	0	0	1	0
DP	cluster_138220nn	B30.2	yes	20	0	0	1	0
DP	cluster_139431nn	B30.2	no	2	0	0	1	0
KG	cluster_4	B30.2	no	16	0.0142	0.0116	0.816	-0.483392
KG	cluster_6	B30.2	no	20	0.0148	0.0186	1.256	0.88375
KG	cluster_40	B30.2	yes	8	0.0128	0.0045	0.351	-1.83163
KG	cluster_42	B30.2	no	1	0.0018	0	0	-1.12411
KG	cluster_44	B30.2	no	16	0.0022	0.0012	0.545	-1.06646
KG	cluster_48	B30.2	yes	1	0.0074	0.0004	0.054	-1.83206
KG	cluster_49	B30.2	no	17	0.0099	0.014	1.414	1.1658
KG	cluster_60	B30.2	no	16	0.0032	0.0012	0.375	-1.67587
KG	cluster_63	B30.2	yes	10	0.0099	0.0086	0.868	0.159773
KG	cluster_65	B30.2	no	16	0.0133	0.0113	0.849	-0.393947
KG	cluster_67	B30.2	no	10	0.0093	0.0055	0.591	-1.1558
KG	cluster_80	B30.2	no	19	0.0057	0.0075	1.315	1.04135
KG	cluster_82	B30.2	no	4	0.0049	0.0031	0.632	0.0865324
KG	cluster_84	B30.2	yes	14	0.0061	0.0059	0.967	0.149965
KG	cluster_88	B30.2	yes	18	0.0214	0.0167	0.78	-0.91222
KG	cluster_89	B30.2	yes	9	0.0107	0.0076	0.71	-0.418681
KG	cluster_95	B30.2	yes	12	0.0024	0.0008	0.333	-1.49891
KG	cluster_98	B30.2	no	6	0.0006	0.0002	0.333	-0.697827
KG	cluster_403	B30.2	no	2	0.0232	0.0065	0.28	-1.16256
KG	cluster_416	B30.2	yes	5	0.0078	0.005	0.641	-0.148453
KG	cluster_419	B30.2	yes	12	0.0034	0.0036	1.058	0.520831
KG	cluster_436n	B30.2	yes	1	0.0148	0.001	0.067	-1.96399
KG	cluster_444	B30.2	no	2	0.002	0.001	0.5	0.456937
KG	cluster_446	B30.2	no	5	0.0039	0.0011	0.282	-1.47315
KG	cluster_449	B30.2	no	7	0.0034	0.0011	0.323	-1.45117
KG	cluster_458n	B30.2	yes	2	0	0	1	0
KG	cluster_475n	B30.2	yes	2	0.0121	0.0025	0.206	-1.58699
KG	cluster_490n	B30.2	yes	4	0.0049	0.0018	0.367	-1.0694
KG	cluster_491	B30.2	yes	15	0	0	1	0
KG	cluster_498	B30.2	no	2	0	0	1	0
KG	cluster_499	B30.2	no	3	0.0056	0.0008	0.142	-2.02473
KG	cluster_564n	B30.2	no	4	0.0064	0.0015	0.234	-1.7711
KG	cluster_603	B30.2	no	5	0.0065	0.0043	0.661	0.00368022
KG	cluster_606	B30.2	no	1	0.0092	0.0005	0.054	-1.90075
KG	cluster_607	B30.2	no	15	0.0014	0.0002	0.142	-1.71621
KG	cluster_630	B30.2	yes	13	0.0087	0.0042	0.482	-1.50793
KG	cluster_633	B30.2	no	2	0	0	1	0
KG	cluster_653	B30.2	no	12	0.0099	0.0037	0.373	-1.90789
KG	cluster_659	B30.2	no	19	0	0	1	0
KG	cluster_673	B30.2	no	12	0.0213	0.0178	0.835	-0.182231
KG	cluster_677	B30.2	no	4	0.0049	0.0028	0.571	-0.185983
KG	cluster_691	B30.2	no	20	0	0	1	0
KG	cluster_692	B30.2	no	19	0.0083	0.0066	0.795	-0.669884
KG	cluster_695	B30.2	no	2	0	0	1	0
KG	cluster_698	B30.2	no	6	0	0	1	0
KG	cluster_800	B30.2	yes	9	0.001	0.0008	0.8	0.0444654
KG	cluster_804	B30.2	no	16	0.0055	0.0055	1	-0.0272754
KG	cluster_807	B30.2	no	16	0.0147	0.014	0.952	-0.371662
KG	cluster_810	B30.2	no	5	0.0078	0.0027	0.346	-1.48112
KG	cluster_811	B30.2	no	1	0.0129	0.0006	0.046	-2.18004
KG	cluster_819	B30.2	yes	10	0.012	0.0126	1.05	0.854278
KG	cluster_822	B30.2	no	8	0.0161	0.0115	0.714	-0.357879
KG	cluster_867	B30.2	yes	19	0.0105	0.0125	1.19	0.65402
KG	cluster_880	B30.2	no	14	0.0266	0.0376	1.413	1.66053
KG	cluster_881	B30.2	yes	14	0	0	1	0
KG	cluster_882	B30.2	yes	12	0.0049	0.0029	0.591	-0.975692
KG	cluster_883	B30.2	no	14	0.0057	0.0019	0.333	-1.92202
KG	cluster_885	B30.2	no	4	0.0035	0.0009	0.257	-1.43758
KG	cluster_891	B30.2	yes	20	0.0134	0.0064	0.477	-1.7364
KG	cluster_958	B30.2	yes	19	0.0079	0.0054	0.683	-0.997653
KG	cluster_971n	B30.2	no	2	0	0	1	0
KG	cluster_981	B30.2	yes	3	0	0	1	0
KG	cluster_982	B30.2	no	17	0.0131	0.0136	1.038	0.441535
KG	cluster_983	B30.2	no	14	0.0085	0.0082	0.964	0.648715
KG	cluster_986	B30.2	no	16	0.0119	0.0167	1.403	1.59986
KG	cluster_989	B30.2	no	11	0	0	1	0
KG	cluster_1028n	B30.2	yes	14	0	0	1	0
KG	cluster_1146n	B30.2	yes	2	0	0	1	0
KG	cluster_1163n	B30.2	no	3	0	0	1	0
KG	cluster_1270n	B30.2	no	1	0	0	1	0
KG	cluster_1276n	B30.2	no	9	0	0	1	0
KG	cluster_1313n	B30.2	no	10	0	0	1	0
KG	cluster_1412n	B30.2	yes	12	0	0	1	0
KG	cluster_1420n	B30.2	yes	11	0	0	1	0
KG	cluster_1432n	B30.2	yes	3	0	0	1	0
KG	cluster_1488n	B30.2	no	4	0	0	1	0
KG	cluster_1506n	B30.2	no	9	0	0	1	0
KG	cluster_1536n	B30.2	no	8	0	0	1	0
KG	cluster_1583n	B30.2	yes	12	0	0	1	0
KG	cluster_1636n	B30.2	no	13	0	0	1	0
KG	cluster_1669n	B30.2	yes	7	0	0	1	0
KG	cluster_1709n	B30.2	yes	5	0	0	1	0
KG	cluster_1789n	B30.2	yes	4	0	0	1	0
KG	cluster_1810n	B30.2	no	1	0	0	1	0
KG	cluster_1950n	B30.2	no	2	0	0	1	0
KG	cluster_1985n	B30.2	no	1	0	0	1	0
KG	cluster_2142n	B30.2	no	4	0	0	1	0
KG	cluster_2336n	B30.2	yes	1	0	0	1	0
KG	cluster_2359n	B30.2	yes	4	0	0	1	0
KG	cluster_2370n	B30.2	yes	3	0	0	1	0
KG	cluster_2572n	B30.2	yes	3	0	0	1	0
KG	cluster_2616n	B30.2	no	3	0	0	1	0
KG	cluster_2695n	B30.2	no	3	0	0	1	0
KG	cluster_2737n	B30.2	no	8	0	0	1	0
KG	cluster_2781n	B30.2	yes	2	0	0	1	0
KG	cluster_2798n	B30.2	no	6	0	0	1	0
KG	cluster_2800n	B30.2	yes	1	0	0	1	0
KG	cluster_2801n	B30.2	no	1	0	0	1	0
KG	cluster_2851n	B30.2	no	11	0	0	1	0
KG	cluster_2880n	B30.2	no	1	0	0	1	0
KG	cluster_2912n	B30.2	no	4	0	0	1	0
KG	cluster_3032n	B30.2	yes	5	0	0	1	0
KG	cluster_3050n	B30.2	no	5	0	0	1	0
KG	cluster_3113n	B30.2	no	3	0	0	1	0
KG	cluster_3172n	B30.2	yes	9	0	0	1	0
KG	cluster_3234nn	B30.2	yes	5	0	0	1	0
KG	cluster_3352n	B30.2	no	2	0	0	1	0
KG	cluster_3361n	B30.2	no	10	0	0	1	0
KG	cluster_3402n	B30.2	yes	11	0	0	1	0
KG	cluster_3443n	B30.2	no	2	0	0	1	0
KG	cluster_3489n	B30.2	no	5	0	0	1	0
KG	cluster_3551n	B30.2	no	4	0	0	1	0
KG	cluster_3572n	B30.2	yes	1	0	0	1	0
KG	cluster_3663n	B30.2	no	1	0	0	1	0
KG	cluster_3688n	B30.2	yes	3	0	0	1	0
KG	cluster_3706n	B30.2	yes	4	0	0	1	0
KG	cluster_3852n	B30.2	no	1	0	0	1	0
KG	cluster_3947n	B30.2	yes	6	0	0	1	0
KG	cluster_3980n	B30.2	no	1	0	0	1	0
KG	cluster_4009	B30.2	no	20	0.0069	0.0091	1.318	0.621717
KG	cluster_4024n	B30.2	yes	2	0.004	0.0004	0.1	-1.73974
KG	cluster_4040	B30.2	yes	1	0.024	0.0031	0.129	-1.45347
KG	cluster_4041	B30.2	no	3	0.0105	0.0012	0.114	-2.43817
KG	cluster_4042	B30.2	yes	2	0.006	0.0006	0.1	-1.99641
KG	cluster_4043	B30.2	yes	1	0.0037	0.0002	0.054	-1.43058
KG	cluster_4045	B30.2	no	14	0.0033	0.0023	0.696	-0.681481
KG	cluster_4048	B30.2	no	12	0.0064	0.0049	0.765	-0.398268
KG	cluster_4050	B30.2	no	18	0	0	1	0
KG	cluster_4120	B30.2	no	15	0.0079	0.0077	0.974	0.137173
KG	cluster_4163	B30.2	no	4	0.0035	0.0014	0.4	-0.883795
KG	cluster_4174	B30.2	no	14	0.0061	0.0052	0.852	-0.143316
KG	cluster_4175	B30.2	no	14	0.0247	0.0289	1.17	0.741621
KG	cluster_4181	B30.2	no	16	0	0	1	0
KG	cluster_4182	B30.2	no	2	0	0	1	0
KG	cluster_4185	B30.2	yes	4	0.0042	0.0015	0.357	-1.10675
KG	cluster_4192	B30.2	no	6	0.0141	0.0104	0.737	0.120352
KG	cluster_4198	B30.2	no	2	0	0	1	0
KG	cluster_4241nn	B30.2	yes	9	0.0075	0.0046	0.613	-0.737093
KG	cluster_4294	B30.2	yes	15	0.0088	0.0051	0.579	-1.27024
KG	cluster_4408	B30.2	no	11	0.006	0.0058	0.966	0.323153
KG	cluster_4409	B30.2	no	15	0.0023	0.0009	0.391	-1.03941
KG	cluster_4412	B30.2	yes	6	0.0085	0.0077	0.905	0.825157
KG	cluster_4438nn	B30.2	yes	1	0	0	1	0
KG	cluster_4441	B30.2	yes	4	0.0207	0.0073	0.352	-1.5332
KG	cluster_4460	B30.2	no	3	0.0048	0.0006	0.125	-2.0397
KG	cluster_4468	B30.2	yes	1	0.0055	0.0009	0.163	-0.554566
KG	cluster_4803	B30.2	yes	1	0.0185	0.001	0.054	-2.27968
KG	cluster_4813	B30.2	yes	9	0.001	0.0008	0.8	-0.0814022
KG	cluster_4815	B30.2	no	3	0.0048	0.0008	0.166	-1.82208
KG	cluster_4821	B30.2	no	1	0.0018	0	0	-1.12411
KG	cluster_4833	B30.2	no	1	0	0	1	0
KG	cluster_4846	B30.2	no	4	0	0	1	0
KG	cluster_4847	B30.2	no	3	0	0	1	0
KG	cluster_4849	B30.2	no	3	0.004	0.0021	0.525	0.00896693
KG	cluster_4851	B30.2	yes	2	0.001	0.0003	0.3	-0.197388
KG	cluster_4857	B30.2	no	5	0	0	1	0
KG	cluster_4858	B30.2	no	13	0	0	1	0
KG	cluster_4867	B30.2	yes	1	0	0	1	0
KG	cluster_4870	B30.2	yes	3	0.0081	0.0025	0.308	-1.24027
KG	cluster_4885n	B30.2	yes	2	0	0	1	0
KG	cluster_4895	B30.2	yes	4	0	0	1	0
KG	cluster_4917	B30.2	no	17	0	0	1	0
KG	cluster_5903nn	B30.2	yes	15	0.0107	0.0071	0.663	-0.952297
KG	cluster_5970n	B30.2	no	16	0.0137	0.007	0.51	-1.58875
KG	cluster_5992nn	B30.2	no	3	0	0	1	0
KG	cluster_6009	B30.2	yes	12	0.0064	0.0048	0.75	-0.474684
KG	cluster_6011	B30.2	yes	1	0	0	1	0
KG	cluster_6016	B30.2	no	2	0.006	0.0006	0.1	-2.05043
KG	cluster_6024	B30.2	yes	6	0.0024	0.0008	0.333	-1.24715
KG	cluster_6027	B30.2	yes	3	0.0137	0.0024	0.175	-2.16482
KG	cluster_6053	B30.2	yes	4	0.0071	0.0049	0.69	0.407064
KG	cluster_6054	B30.2	no	11	0.0081	0.0039	0.481	-1.37877
KG	cluster_6066	B30.2	no	13	0	0	1	0
KG	cluster_6072	B30.2	no	12	0.0143	0.0181	1.265	1.3856
KG	cluster_6073	B30.2	yes	5	0.0013	0.0001	0.076	-1.46494
KG	cluster_6083	B30.2	no	2	0	0	1	0
KG	cluster_6325	B30.2	no	8	0	0	1	0
KG	cluster_6327	B30.2	yes	2	0.003	0.0002	0.066	-1.69247
KG	cluster_6333	B30.2	yes	2	0.004	0.0005	0.125	-1.69226
KG	cluster_6338	B30.2	no	6	0	0	1	0
KG	cluster_6339	B30.2	no	2	0	0	1	0
KG	cluster_6341	B30.2	no	6	0	0	1	0
KG	cluster_6368	B30.2	yes	7	0.0052	0.0046	0.884	0.524503
KG	cluster_6373	B30.2	no	1	0	0	1	0
KG	cluster_6373n	B30.2	no	2	0.009	0.0013	0.144	-1.93376
KG	cluster_6375	B30.2	no	12	0.0069	0.0068	0.985	0.389644
KG	cluster_6377	B30.2	yes	14	0.0023	0.0024	1.043	-0.855137
KG	cluster_6378	B30.2	no	17	0.0049	0.0019	0.387	-1.81458
KG	cluster_6383	B30.2	yes	7	0.004	0.0033	0.825	0.304591
KG	cluster_6388	B30.2	no	2	0.0171	0.0037	0.216	-1.62429
KG	cluster_6389	B30.2	no	6	0.0012	0.0005	0.416	-1.09133
KG	cluster_6521	B30.2	no	1	0	0	1	0
KG	cluster_6527	B30.2	no	5	0.0052	0.0059	1.134	2.02973
KG	cluster_6539	B30.2	no	1	0.0351	0.0031	0.088	-2.07046
KG	cluster_6552	B30.2	no	10	0	0	1	0
KG	cluster_6560	B30.2	no	6	0	0	1	0
KG	cluster_6575	B30.2	no	16	0.0087	0.0069	0.793	-0.530985
KG	cluster_6591	B30.2	yes	3	0.0178	0.0087	0.488	-0.259192
KG	cluster_6593	B30.2	no	9	0.0086	0.0063	0.732	-0.288409
KG	cluster_6594	B30.2	no	1	0.0129	0.0009	0.069	-1.86511
KG	cluster_6598	B30.2	no	8	0	0	1	0
KG	cluster_6606n	B30.2	no	1	0.0166	0.001	0.06	-2.10431
KG	cluster_6760	B30.2	yes	9	0.0096	0.0033	0.343	-1.87193
KG	cluster_6774	B30.2	no	2	0	0	1	0
KG	cluster_6784	B30.2	no	1	0	0	1	0
KG	cluster_6797	B30.2	no	3	0	0	1	0
KG	cluster_6803n	B30.2	no	19	0	0	1	0
KG	cluster_6916	B30.2	no	17	0.0104	0.0057	0.548	-1.44838
KG	cluster_6919	B30.2	no	3	0.004	0.0008	0.2	-1.60383
KG	cluster_6923	B30.2	yes	2	0.0101	0.0051	0.504	0.537095
KG	cluster_6925	B30.2	no	3	0.0081	0.0019	0.234	-1.64802
KG	cluster_6932	B30.2	yes	2	0.0181	0.002	0.11	-2.42211
KG	cluster_6934	B30.2	yes	7	0.0098	0.0056	0.571	-0.755129
KG	cluster_6953	B30.2	no	2	0	0	1	0
KG	cluster_6963	B30.2	yes	4	0.0207	0.0093	0.449	-1.02231
KG	cluster_6968	B30.2	yes	1	0.0055	0.0006	0.109	-1.07553
KG	cluster_6987	B30.2	yes	3	0.0162	0.0054	0.333	-1.46712
KG	cluster_6999	B30.2	yes	1	0.0685	0.0088	0.128	-1.68542
KG	cluster_7454n	B30.2	yes	4	0	0	1	0
KG	cluster_7532nn	B30.2	no	10	0.0067	0.0051	0.761	-0.317182
KG	cluster_8003	B30.2	yes	1	0.0407	0.0105	0.257	0.341427
KG	cluster_8007	B30.2	no	3	0	0	1	0
KG	cluster_8015n	B30.2	no	1	0.0018	0	0	-1.10856
KG	cluster_8023	B30.2	yes	1	0.0055	0.0003	0.054	-1.56169
KG	cluster_8031	B30.2	no	14	0.0052	0.0023	0.442	-1.53083
KG	cluster_8034	B30.2	no	16	0.0078	0.0065	0.833	-0.386897
KG	cluster_8050	B30.2	no	8	0.005	0.0044	0.88	0.386773
KG	cluster_8057	B30.2	yes	4	0	0	1	0
KG	cluster_8058	B30.2	no	11	0.0142	0.0091	0.64	-1.01614
KG	cluster_8065	B30.2	yes	8	0.0022	0.0022	1	0.66777
KG	cluster_8066	B30.2	no	1	0	0	1	0
KG	cluster_8072	B30.2	no	4	0.0021	0.0011	0.523	-0.186755
KG	cluster_8110	B30.2	no	11	0.0101	0.0066	0.653	-0.775664
KG	cluster_8112	B30.2	no	3	0.0243	0.0088	0.362	-1.12494
KG	cluster_8116	B30.2	no	13	0.0048	0.0043	0.895	-0.0358922
KG	cluster_8117	B30.2	no	2	0	0	1	0
KG	cluster_8155	B30.2	yes	6	0.0024	0.0017	0.708	-0.038264
KG	cluster_8161	B30.2	no	2	0.005	0.0013	0.26	-0.980163
KG	cluster_8164	B30.2	no	4	0.0064	0.0012	0.187	-2.00968
KG	cluster_8171	B30.2	yes	12	0.0064	0.0038	0.593	-1.03092
KG	cluster_8175n	B30.2	yes	14	0.0104	0.0059	0.567	-1.24248
KG	cluster_8181	B30.2	no	10	0.0036	0.003	0.833	-0.0164785
KG	cluster_8186	B30.2	no	3	0	0	1	0
KG	cluster_8187	B30.2	no	2	0	0	1	0
KG	cluster_8208	B30.2	no	15	0.0191	0.0153	0.801	-0.42833
KG	cluster_8223	B30.2	no	15	0.0051	0.005	0.98	0.148029
KG	cluster_8230	B30.2	yes	5	0.0091	0.0046	0.505	-0.738949
KG	cluster_8234	B30.2	no	1	0	0	1	0
KG	cluster_8236	B30.2	no	5	0	0	1	0
KG	cluster_8243	B30.2	no	2	0.0565	0.0153	0.27	-1.40653
KG	cluster_8270	B30.2	no	3	0	0	1	0
KG	cluster_8278	B30.2	no	9	0.0053	0.0023	0.433	-1.40893
KG	cluster_8296	B30.2	no	3	0.004	0.0022	0.55	0.0441497
KG	cluster_8415	B30.2	yes	8	0.015	0.0087	0.58	-0.994913
KG	cluster_8420	B30.2	yes	1	0.0055	0.0004	0.072	-1.40802
KG	cluster_8490n	B30.2	yes	1	0	0	1	0
KG	cluster_8608	B30.2	no	9	0.0075	0.008	1.066	1.08109
KG	cluster_8626	B30.2	yes	4	0.0257	0	0	-1.24567
KG	cluster_8642	B30.2	no	17	0.0249	0.0185	0.742	-0.932121
KG	cluster_8667	B30.2	yes	13	0.0009	0.0004	0.444	-0.834214
KG	cluster_8676	B30.2	yes	3	0.0016	0.0005	0.312	-0.659961
KG	cluster_8682	B30.2	no	1	0.0055	0.0002	0.036	-1.71621
KG	cluster_8683	B30.2	yes	4	0.0092	0.0023	0.25	-1.85178
KG	cluster_8800	B30.2	yes	7	0.0151	0.0074	0.49	-1.18825
KG	cluster_8801	B30.2	no	4	0.0085	0.0044	0.517	-0.444097
KG	cluster_8813	B30.2	no	2	0.005	0.0012	0.24	-1.13964
KG	cluster_8827	B30.2	no	8	0.0212	0.0118	0.556	-1.22482
KG	cluster_8849	B30.2	no	10	0	0	1	0
KG	cluster_8919	B30.2	yes	20	0.0004	0.0004	1	0.134817
KG	cluster_8972	B30.2	no	3	0	0	1	0
KG	cluster_8982	B30.2	no	5	0.0144	0.0048	0.333	-1.82527
KG	cluster_9440n	B30.2	yes	4	0.0028	0.001	0.357	-0.884702
KG	cluster_9502	B30.2	yes	5	0.0052	0.0009	0.173	-2.10198
KG	cluster_9504	B30.2	yes	10	0.0041	0.0015	0.365	-1.61147
KG	cluster_9546	B30.2	no	1	0	0	1	0
KG	cluster_9565	B30.2	yes	12	0.0049	0.0036	0.734	-0.459908
KG	cluster_9581	B30.2	yes	3	0.0113	0.0039	0.345	-1.12642
KG	cluster_9632n	B30.2	yes	1	0.0092	0.0018	0.195	-0.438778
KG	cluster_9804	B30.2	no	1	0	0	1	0
KG	cluster_9807	B30.2	no	2	0.004	0.0004	0.1	-1.72744
KG	cluster_9817	B30.2	no	3	0.0024	0.0019	0.791	1.1077
KG	cluster_9829	B30.2	yes	6	0.0147	0.008	0.544	-0.847384
KG	cluster_9830	B30.2	yes	1	0	0	1	0
KG	cluster_9833	B30.2	yes	12	0.0123	0.0151	1.227	1.09481
KG	cluster_9841n	B30.2	yes	3	0.0032	0.0009	0.281	-1.02908
KG	cluster_9847	B30.2	no	6	0.0079	0.0055	0.696	-0.0853315
KG	cluster_9866	B30.2	no	1	0	0	1	0
KG	cluster_9868	B30.2	yes	1	0.0074	0.0007	0.094	-1.39796
KG	cluster_9871	B30.2	no	17	0.0058	0.0056	0.965	-0.0611708
KG	cluster_9893	B30.2	no	2	0	0	1	0
KG	cluster_10035n	B30.2	no	19	0	0	1	0
KG	cluster_10124n	B30.2	no	1	0	0	1	0
KG	cluster_10442n	B30.2	yes	9	0	0	1	0
KG	cluster_10633n	B30.2	yes	5	0	0	1	0
KG	cluster_10677n	B30.2	no	3	0	0	1	0
KG	cluster_11309n	B30.2	yes	3	0	0	1	0
KG	cluster_11425n	B30.2	yes	8	0	0	1	0
KG	cluster_11535n	B30.2	yes	1	0	0	1	0
KG	cluster_11607n	B30.2	yes	1	0	0	1	0
KG	cluster_11935n	B30.2	yes	1	0	0	1	0
KG	cluster_12784n	B30.2	yes	4	0	0	1	0
KG	cluster_13068n	B30.2	no	8	0	0	1	0
KG	cluster_13292n	B30.2	yes	3	0	0	1	0
KG	cluster_13306n	B30.2	no	7	0	0	1	0
KG	cluster_13409n	B30.2	yes	3	0	0	1	0
KG	cluster_13489n	B30.2	yes	2	0	0	1	0
KG	cluster_13556n	B30.2	no	11	0	0	1	0
KG	cluster_13674n	B30.2	yes	1	0	0	1	0
KG	cluster_13683n	B30.2	no	8	0	0	1	0
KG	cluster_13792n	B30.2	no	4	0	0	1	0
KG	cluster_13815n	B30.2	no	19	0	0	1	0
KG	cluster_14002n	B30.2	yes	4	0	0	1	0
KG	cluster_14095n	B30.2	no	11	0	0	1	0
KG	cluster_14427n	B30.2	yes	2	0	0	1	0
KG	cluster_14635n	B30.2	yes	2	0	0	1	0
KG	cluster_14690n	B30.2	no	1	0	0	1	0
KG	cluster_14745n	B30.2	yes	12	0	0	1	0
KG	cluster_14750n	B30.2	yes	6	0	0	1	0
KG	cluster_15055n	B30.2	yes	4	0	0	1	0
KG	cluster_15092n	B30.2	no	3	0	0	1	0
KG	cluster_15139n	B30.2	no	11	0	0	1	0
KG	cluster_15267n	B30.2	no	4	0	0	1	0
KG	cluster_15477n	B30.2	yes	1	0	0	1	0
KG	cluster_15634n	B30.2	yes	13	0	0	1	0
KG	cluster_15889n	B30.2	yes	9	0	0	1	0
KG	cluster_16123n	B30.2	no	1	0	0	1	0
KG	cluster_16325n	B30.2	no	2	0	0	1	0
KG	cluster_16654n	B30.2	yes	15	0	0	1	0
KG	cluster_17997n	B30.2	no	16	0	0	1	0
KG	cluster_18042n	B30.2	yes	10	0	0	1	0
KG	cluster_18071n	B30.2	no	14	0	0	1	0
KG	cluster_18295n	B30.2	no	14	0	0	1	0
KG	cluster_18427n	B30.2	no	4	0	0	1	0
KG	cluster_18465n	B30.2	yes	1	0	0	1	0
KG	cluster_18675n	B30.2	no	3	0	0	1	0
KG	cluster_18836n	B30.2	yes	4	0	0	1	0
KG	cluster_19108n	B30.2	yes	1	0	0	1	0
KG	cluster_19223n	B30.2	yes	9	0	0	1	0
KG	cluster_19628n	B30.2	no	18	0	0	1	0
KG	cluster_19700n	B30.2	no	2	0	0	1	0
KG	cluster_19819n	B30.2	no	2	0	0	1	0
KG	cluster_19966n	B30.2	no	1	0	0	1	0
KG	cluster_19977n	B30.2	yes	1	0	0	1	0
KG	cluster_20376n	B30.2	no	15	0	0	1	0
KG	cluster_20583n	B30.2	yes	12	0	0	1	0
KG	cluster_20697n	B30.2	no	14	0	0	1	0
KG	cluster_21025n	B30.2	yes	3	0	0	1	0
KG	cluster_21103n	B30.2	no	3	0	0	1	0
KG	cluster_21239n	B30.2	yes	1	0	0	1	0
KG	cluster_21480n	B30.2	yes	19	0	0	1	0
KG	cluster_21557n	B30.2	yes	7	0	0	1	0
KG	cluster_21585n	B30.2	no	12	0	0	1	0
KG	cluster_21687n	B30.2	yes	10	0	0	1	0
KG	cluster_21714n	B30.2	yes	2	0	0	1	0
KG	cluster_21804n	B30.2	no	2	0	0	1	0
KG	cluster_22135n	B30.2	no	9	0	0	1	0
KG	cluster_22221n	B30.2	yes	3	0	0	1	0
KG	cluster_22555nn	B30.2	yes	9	0	0	1	0
KG	cluster_22619n	B30.2	no	3	0	0	1	0
KG	cluster_22757n	B30.2	no	4	0	0	1	0
KG	cluster_23057n	B30.2	no	9	0	0	1	0
KG	cluster_23066n	B30.2	no	3	0	0	1	0
KG	cluster_23100nn	B30.2	no	3	0	0	1	0
KG	cluster_23139n	B30.2	yes	3	0	0	1	0
KG	cluster_23144n	B30.2	yes	1	0	0	1	0
KG	cluster_23159n	B30.2	yes	3	0	0	1	0
KG	cluster_23215n	B30.2	yes	4	0	0	1	0
KG	cluster_23225n	B30.2	no	20	0	0	1	0
KG	cluster_23297n	B30.2	yes	12	0	0	1	0
KG	cluster_23313n	B30.2	no	15	0	0	1	0
KG	cluster_23327n	B30.2	yes	7	0	0	1	0
KG	cluster_23333n	B30.2	yes	9	0	0	1	0
KG	cluster_23365n	B30.2	no	4	0	0	1	0
KG	cluster_23409n	B30.2	yes	7	0	0	1	0
KG	cluster_23440n	B30.2	no	4	0	0	1	0
KG	cluster_23448n	B30.2	yes	7	0	0	1	0
KG	cluster_23585n	B30.2	no	20	0	0	1	0
KG	cluster_23589n	B30.2	no	6	0	0	1	0
KG	cluster_23859n	B30.2	no	5	0	0	1	0
KG	cluster_23902n	B30.2	no	1	0	0	1	0
KG	cluster_23903n	B30.2	yes	5	0	0	1	0
KG	cluster_23916n	B30.2	no	17	0	0	1	0
KG	cluster_23917n	B30.2	no	2	0	0	1	0
KG	cluster_23945n	B30.2	yes	17	0	0	1	0
KG	cluster_23947n	B30.2	yes	4	0	0	1	0
KG	cluster_23989n	B30.2	yes	10	0	0	1	0
KG	cluster_24012n	B30.2	no	3	0	0	1	0
KG	cluster_24075n	B30.2	no	1	0	0	1	0
KG	cluster_24206n	B30.2	no	7	0	0	1	0
KG	cluster_24229n	B30.2	no	13	0	0	1	0
KG	cluster_24253n	B30.2	no	11	0	0	1	0
KG	cluster_24487n	B30.2	no	2	0	0	1	0
KG	cluster_24605n	B30.2	no	5	0	0	1	0
KG	cluster_24617n	B30.2	yes	3	0	0	1	0
KG	cluster_24647n	B30.2	no	15	0	0	1	0
KG	cluster_24657n	B30.2	yes	8	0	0	1	0
KG	cluster_24668n	B30.2	no	6	0	0	1	0
KG	cluster_24707n	B30.2	no	5	0	0	1	0
KG	cluster_24733n	B30.2	yes	1	0	0	1	0
KG	cluster_24904n	B30.2	no	15	0	0	1	0
KG	cluster_24907n	B30.2	no	3	0	0	1	0
KG	cluster_24913n	B30.2	yes	14	0	0	1	0
KG	cluster_24978n	B30.2	no	2	0	0	1	0
KG	cluster_24998n	B30.2	no	3	0	0	1	0
KG	cluster_25015n	B30.2	no	3	0	0	1	0
KG	cluster_25036n	B30.2	no	2	0	0	1	0
KG	cluster_25065n	B30.2	no	7	0	0	1	0
KG	cluster_25098n	B30.2	yes	18	0	0	1	0
KG	cluster_25137n	B30.2	no	12	0	0	1	0
KG	cluster_25183n	B30.2	no	2	0	0	1	0
KG	cluster_25194n	B30.2	yes	7	0	0	1	0
KG	cluster_25306n	B30.2	yes	11	0	0	1	0
KG	cluster_25394n	B30.2	yes	15	0	0	1	0
KG	cluster_25466n	B30.2	yes	20	0	0	1	0
KG	cluster_25558n	B30.2	no	5	0	0	1	0
KG	cluster_25592n	B30.2	no	16	0	0	1	0
KG	cluster_25806n	B30.2	yes	7	0	0	1	0
KG	cluster_25815n	B30.2	no	17	0	0	1	0
KG	cluster_25843n	B30.2	no	12	0	0	1	0
KG	cluster_25896n	B30.2	yes	1	0	0	1	0
KG	cluster_25959n	B30.2	yes	20	0	0	1	0
KG	cluster_26063n	B30.2	no	1	0	0	1	0
KG	cluster_26085n	B30.2	yes	2	0	0	1	0
KG	cluster_26152n	B30.2	no	13	0	0	1	0
KG	cluster_26162n	B30.2	yes	3	0	0	1	0
KG	cluster_26171n	B30.2	no	2	0	0	1	0
KG	cluster_26184n	B30.2	no	4	0	0	1	0
KG	cluster_26249n	B30.2	yes	6	0	0	1	0
KG	cluster_26309n	B30.2	no	1	0	0	1	0
KG	cluster_26417n	B30.2	no	12	0	0	1	0
KG	cluster_26428n	B30.2	no	2	0	0	1	0
KG	cluster_26462n	B30.2	no	7	0	0	1	0
KG	cluster_26511n	B30.2	yes	1	0	0	1	0
KG	cluster_26566n	B30.2	no	5	0	0	1	0
KG	cluster_26729n	B30.2	no	1	0	0	1	0
KG	cluster_26787n	B30.2	yes	6	0	0	1	0
KG	cluster_26895n	B30.2	no	4	0	0	1	0
KG	cluster_26912n	B30.2	yes	5	0	0	1	0
KG	cluster_26917n	B30.2	yes	8	0	0	1	0
KG	cluster_26921n	B30.2	no	17	0	0	1	0
KG	cluster_26955n	B30.2	yes	16	0	0	1	0
KG	cluster_27009n	B30.2	yes	18	0	0	1	0
KG	cluster_27105n	B30.2	yes	1	0	0	1	0
KG	cluster_27139n	B30.2	yes	1	0	0	1	0
KG	cluster_27140n	B30.2	no	1	0	0	1	0
KG	cluster_27192n	B30.2	no	2	0	0	1	0
KG	cluster_27331n	B30.2	no	16	0	0	1	0
KG	cluster_27342n	B30.2	no	4	0	0	1	0
KG	cluster_27350n	B30.2	no	8	0	0	1	0
KG	cluster_27366n	B30.2	no	14	0	0	1	0
KG	cluster_27369n	B30.2	no	2	0	0	1	0
KG	cluster_27431n	B30.2	no	2	0	0	1	0
KG	cluster_27641n	B30.2	yes	12	0	0	1	0
KG	cluster_27646n	B30.2	yes	13	0	0	1	0
KG	cluster_27647n	B30.2	no	10	0	0	1	0
KG	cluster_27896n	B30.2	no	12	0	0	1	0
KG	cluster_27985n	B30.2	no	3	0	0	1	0
KG	cluster_28071n	B30.2	no	3	0	0	1	0
KG	cluster_28103n	B30.2	yes	4	0	0	1	0
KG	cluster_28143n	B30.2	yes	12	0	0	1	0
KG	cluster_28164n	B30.2	yes	11	0	0	1	0
KG	cluster_28257n	B30.2	yes	4	0	0	1	0
KG	cluster_28310n	B30.2	yes	3	0	0	1	0
KG	cluster_28404n	B30.2	no	10	0	0	1	0
KG	cluster_28475n	B30.2	yes	6	0	0	1	0
KG	cluster_28544n	B30.2	no	14	0	0	1	0
KG	cluster_28643n	B30.2	yes	5	0	0	1	0
KG	cluster_28670n	B30.2	no	15	0	0	1	0
KG	cluster_28881n	B30.2	yes	5	0	0	1	0
KG	cluster_28938n	B30.2	no	5	0	0	1	0
KG	cluster_29103n	B30.2	no	18	0	0	1	0
KG	cluster_29401n	B30.2	yes	2	0	0	1	0
KG	cluster_29493n	B30.2	yes	9	0	0	1	0
KG	cluster_29500n	B30.2	yes	7	0	0	1	0
KG	cluster_29507n	B30.2	no	18	0	0	1	0
KG	cluster_29533n	B30.2	no	13	0	0	1	0
KG	cluster_29543n	B30.2	yes	5	0	0	1	0
KG	cluster_29701n	B30.2	no	3	0	0	1	0
KG	cluster_29733n	B30.2	yes	2	0	0	1	0
KG	cluster_30016n	B30.2	yes	4	0	0	1	0
KG	cluster_30103n	B30.2	no	9	0	0	1	0
KG	cluster_30105n	B30.2	yes	10	0	0	1	0
KG	cluster_30113n	B30.2	yes	4	0	0	1	0
KG	cluster_30224n	B30.2	yes	2	0	0	1	0
KG	cluster_30225n	B30.2	yes	5	0	0	1	0
KG	cluster_30397n	B30.2	yes	6	0	0	1	0
KG	cluster_30443n	B30.2	yes	16	0	0	1	0
KG	cluster_30572n	B30.2	no	8	0	0	1	0
KG	cluster_30587n	B30.2	yes	5	0	0	1	0
KG	cluster_30592n	B30.2	no	1	0	0	1	0
KG	cluster_30676n	B30.2	yes	1	0	0	1	0
KG	cluster_30720n	B30.2	no	7	0	0	1	0
KG	cluster_30786n	B30.2	no	3	0	0	1	0
KG	cluster_31099n	B30.2	yes	5	0	0	1	0
KG	cluster_31124n	B30.2	no	3	0	0	1	0
KG	cluster_31181n	B30.2	no	4	0	0	1	0
KG	cluster_31204n	B30.2	yes	9	0	0	1	0
KG	cluster_31319n	B30.2	yes	14	0	0	1	0
KG	cluster_31322n	B30.2	yes	4	0	0	1	0
KG	cluster_31371n	B30.2	no	10	0	0	1	0
KG	cluster_31386n	B30.2	yes	8	0	0	1	0
KG	cluster_31417n	B30.2	no	3	0	0	1	0
KG	cluster_31480n	B30.2	yes	6	0	0	1	0
KG	cluster_31541n	B30.2	no	9	0	0	1	0
KG	cluster_31591n	B30.2	yes	8	0	0	1	0
KG	cluster_31629n	B30.2	yes	2	0	0	1	0
KG	cluster_31660n	B30.2	no	6	0	0	1	0
KG	cluster_31676n	B30.2	yes	4	0	0	1	0
KG	cluster_31692n	B30.2	no	2	0	0	1	0
KG	cluster_31701n	B30.2	yes	7	0	0	1	0
KG	cluster_31717n	B30.2	no	6	0	0	1	0
KG	cluster_31740n	B30.2	no	6	0	0	1	0
KG	cluster_31848n	B30.2	yes	7	0	0	1	0
KG	cluster_31971n	B30.2	yes	2	0	0	1	0
KG	cluster_32002n	B30.2	yes	12	0	0	1	0
KG	cluster_32017n	B30.2	yes	20	0	0	1	0
KG	cluster_32177n	B30.2	yes	4	0	0	1	0
KG	cluster_32272n	B30.2	yes	4	0	0	1	0
KG	cluster_32277n	B30.2	no	9	0	0	1	0
KG	cluster_32373n	B30.2	yes	5	0	0	1	0
KG	cluster_32381n	B30.2	yes	3	0	0	1	0
KG	cluster_32446n	B30.2	yes	1	0	0	1	0
KG	cluster_32462n	B30.2	yes	2	0	0	1	0
KG	cluster_32475n	B30.2	no	1	0	0	1	0
KG	cluster_32502n	B30.2	no	11	0	0	1	0
KG	cluster_32512n	B30.2	no	6	0	0	1	0
KG	cluster_32535n	B30.2	yes	1	0	0	1	0
KG	cluster_32586n	B30.2	yes	3	0	0	1	0
KG	cluster_32601n	B30.2	no	2	0	0	1	0
KG	cluster_32683n	B30.2	no	11	0	0	1	0
KG	cluster_32703n	B30.2	no	4	0	0	1	0
KG	cluster_32728n	B30.2	yes	11	0	0	1	0
KG	cluster_32741n	B30.2	no	8	0	0	1	0
KG	cluster_33009n	B30.2	no	3	0	0	1	0
KG	cluster_33093n	B30.2	no	1	0	0	1	0
KG	cluster_33096n	B30.2	no	2	0	0	1	0
KG	cluster_33102n	B30.2	no	18	0	0	1	0
KG	cluster_33183n	B30.2	yes	1	0	0	1	0
KG	cluster_33207n	B30.2	no	10	0	0	1	0
KG	cluster_33229n	B30.2	no	1	0	0	1	0
KG	cluster_33280n	B30.2	yes	6	0	0	1	0
KG	cluster_33283n	B30.2	no	13	0	0	1	0
KG	cluster_33344n	B30.2	no	1	0	0	1	0
KG	cluster_33407n	B30.2	no	1	0	0	1	0
KG	cluster_33461n	B30.2	yes	5	0	0	1	0
KG	cluster_33594n	B30.2	yes	5	0	0	1	0
KG	cluster_33598n	B30.2	yes	10	0	0	1	0
KG	cluster_33641n	B30.2	no	10	0	0	1	0
KG	cluster_33791n	B30.2	no	2	0	0	1	0
KG	cluster_33848n	B30.2	no	5	0	0	1	0
KG	cluster_33877n	B30.2	no	7	0	0	1	0
KG	cluster_33887n	B30.2	yes	11	0	0	1	0
KG	cluster_33917n	B30.2	yes	5	0	0	1	0
KG	cluster_34013n	B30.2	yes	9	0	0	1	0
KG	cluster_34032n	B30.2	yes	3	0	0	1	0
KG	cluster_34078n	B30.2	yes	4	0	0	1	0
KG	cluster_34174n	B30.2	yes	7	0	0	1	0
KG	cluster_34384n	B30.2	yes	7	0	0	1	0
KG	cluster_34406n	B30.2	yes	3	0	0	1	0
KG	cluster_34409n	B30.2	yes	6	0	0	1	0
KG	cluster_34427n	B30.2	yes	1	0	0	1	0
KG	cluster_34541n	B30.2	yes	2	0	0	1	0
KG	cluster_34648n	B30.2	no	12	0	0	1	0
KG	cluster_34722n	B30.2	no	4	0	0	1	0
KG	cluster_34728n	B30.2	yes	2	0	0	1	0
KG	cluster_34733n	B30.2	yes	4	0	0	1	0
KG	cluster_34734n	B30.2	yes	7	0	0	1	0
KG	cluster_34779n	B30.2	no	3	0	0	1	0
KG	cluster_34786n	B30.2	yes	3	0	0	1	0
KG	cluster_34817n	B30.2	yes	1	0	0	1	0
KG	cluster_34827n	B30.2	no	2	0	0	1	0
KG	cluster_34863n	B30.2	yes	5	0	0	1	0
KG	cluster_34880n	B30.2	yes	3	0	0	1	0
KG	cluster_34960n	B30.2	yes	2	0	0	1	0
KG	cluster_35026n	B30.2	no	9	0	0	1	0
KG	cluster_35235n	B30.2	yes	1	0	0	1	0
KG	cluster_35348n	B30.2	yes	1	0	0	1	0
KG	cluster_35386n	B30.2	no	20	0	0	1	0
KG	cluster_35396n	B30.2	yes	3	0	0	1	0
KG	cluster_35429n	B30.2	yes	13	0	0	1	0
KG	cluster_35437n	B30.2	yes	13	0	0	1	0
KG	cluster_35550n	B30.2	yes	5	0	0	1	0
KG	cluster_35627n	B30.2	yes	3	0	0	1	0
KG	cluster_35668n	B30.2	yes	15	0	0	1	0
KG	cluster_35697n	B30.2	yes	1	0	0	1	0
KG	cluster_35808n	B30.2	no	3	0	0	1	0
KG	cluster_35900n	B30.2	yes	2	0	0	1	0
KG	cluster_35918n	B30.2	no	6	0	0	1	0
KG	cluster_35937n	B30.2	no	2	0	0	1	0
KG	cluster_35997n	B30.2	yes	1	0	0	1	0
KG	cluster_36116n	B30.2	yes	7	0	0	1	0
KG	cluster_36129n	B30.2	yes	9	0	0	1	0
KG	cluster_36184n	B30.2	yes	4	0	0	1	0
KG	cluster_36218n	B30.2	yes	8	0	0	1	0
KG	cluster_36241n	B30.2	yes	1	0	0	1	0
KG	cluster_36329n	B30.2	no	10	0	0	1	0
KG	cluster_36432n	B30.2	no	6	0	0	1	0
KG	cluster_36481n	B30.2	no	3	0	0	1	0
KG	cluster_36491n	B30.2	yes	4	0	0	1	0
KG	cluster_36594n	B30.2	no	20	0	0	1	0
KG	cluster_36613n	B30.2	no	3	0	0	1	0
KG	cluster_36722n	B30.2	no	9	0	0	1	0
KG	cluster_36724n	B30.2	no	8	0	0	1	0
KG	cluster_36737n	B30.2	yes	2	0	0	1	0
KG	cluster_36789n	B30.2	yes	1	0	0	1	0
KG	cluster_37175n	B30.2	yes	4	0	0	1	0
[truncated: 2,352 more rows]
