# Supplementary figures and images for: Copy number variation and population-specific immune genes in the model vertebrate zebrafish
Source: eLife journal article supplement (doi:10.7554/elife.98058), 2024-06-04

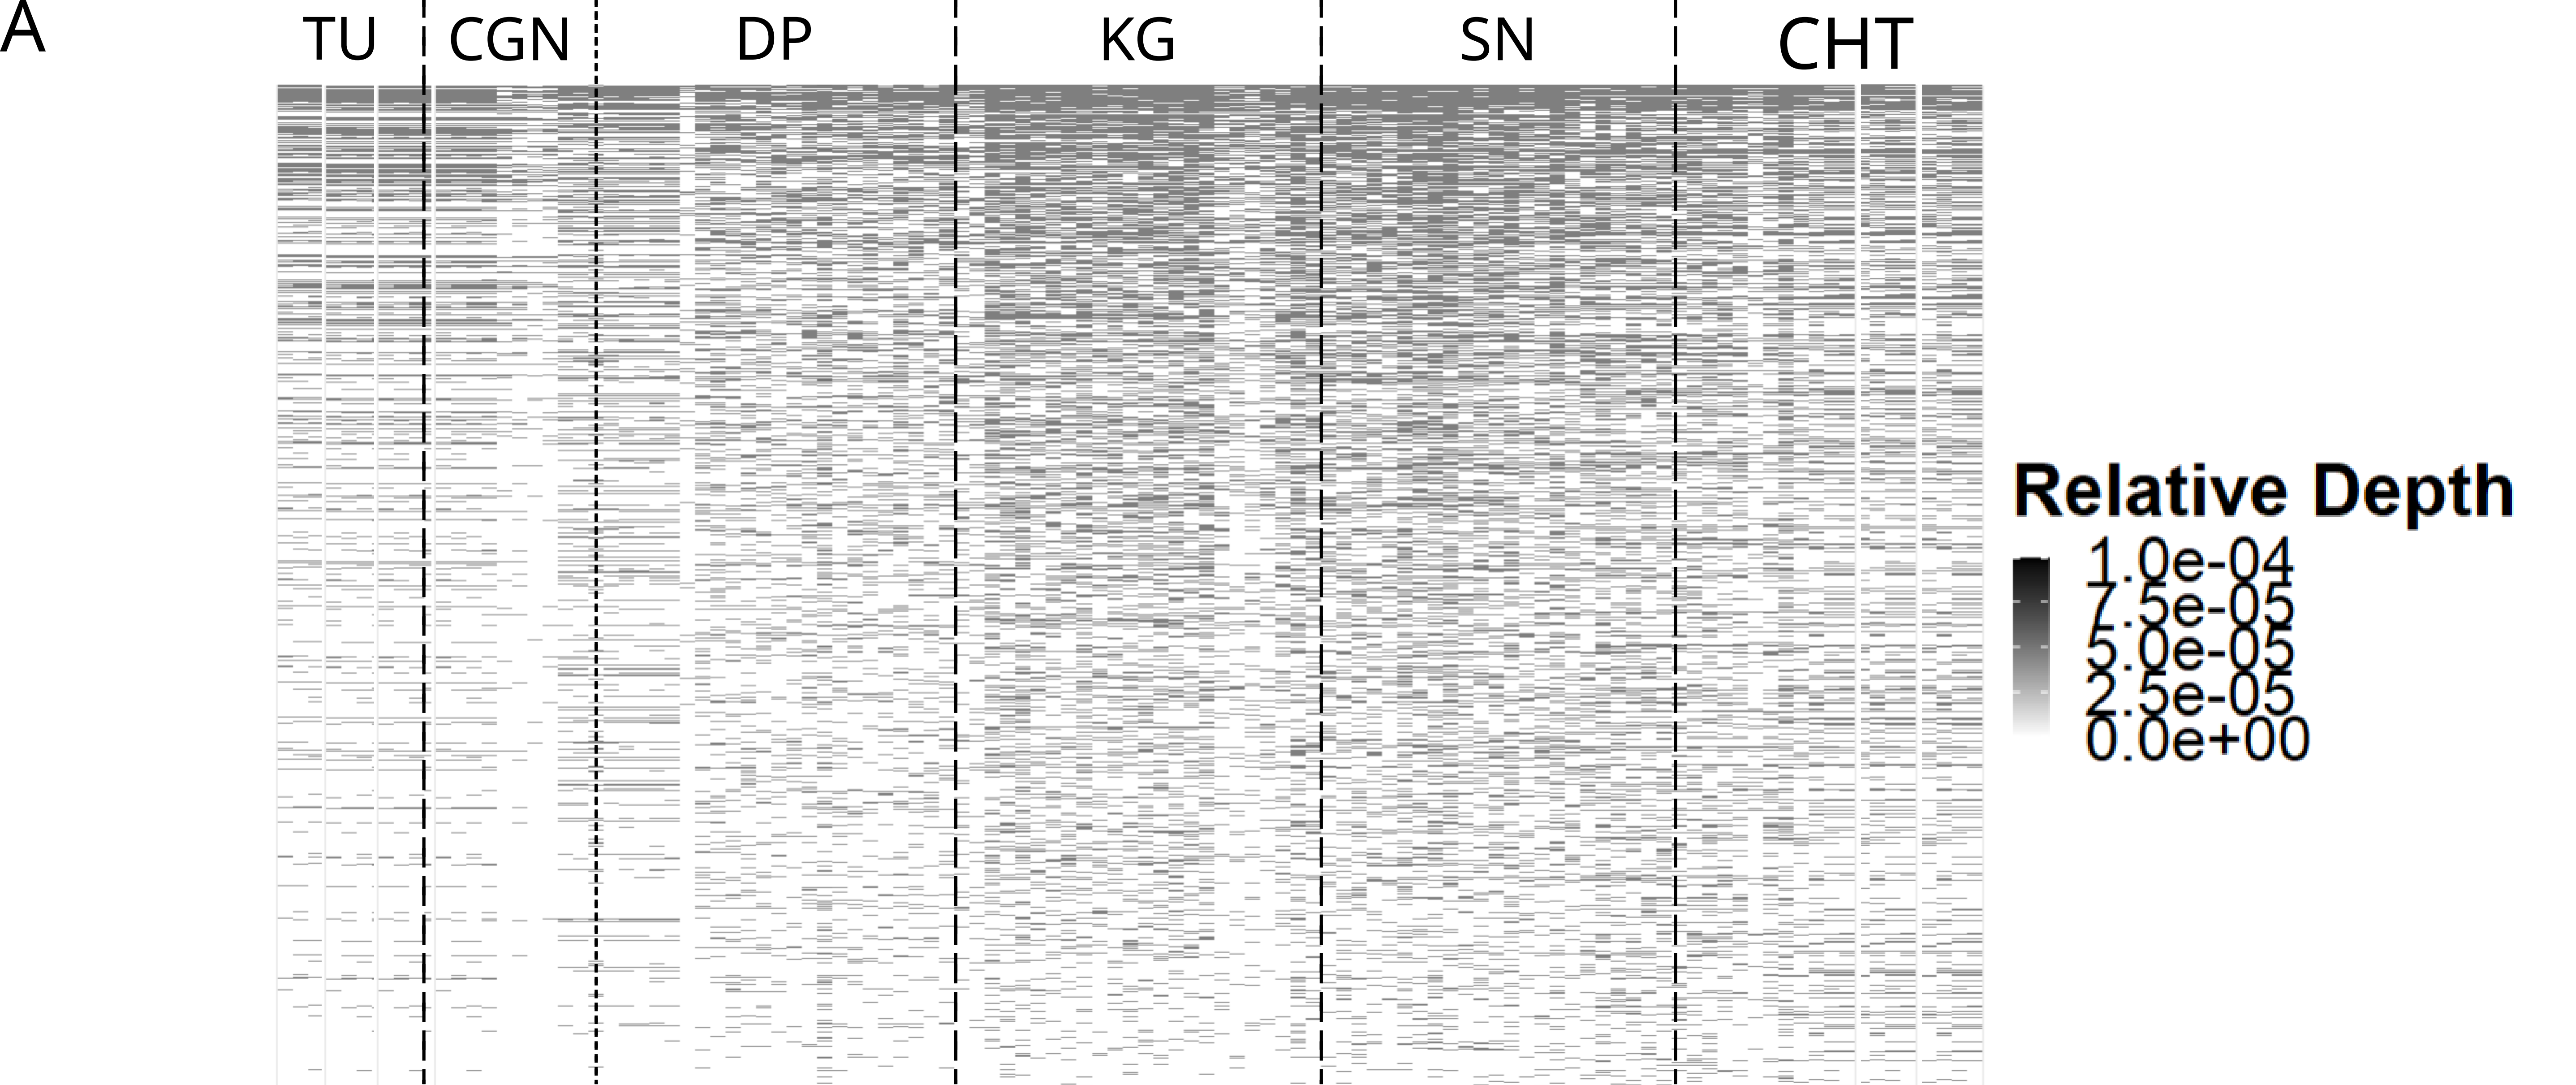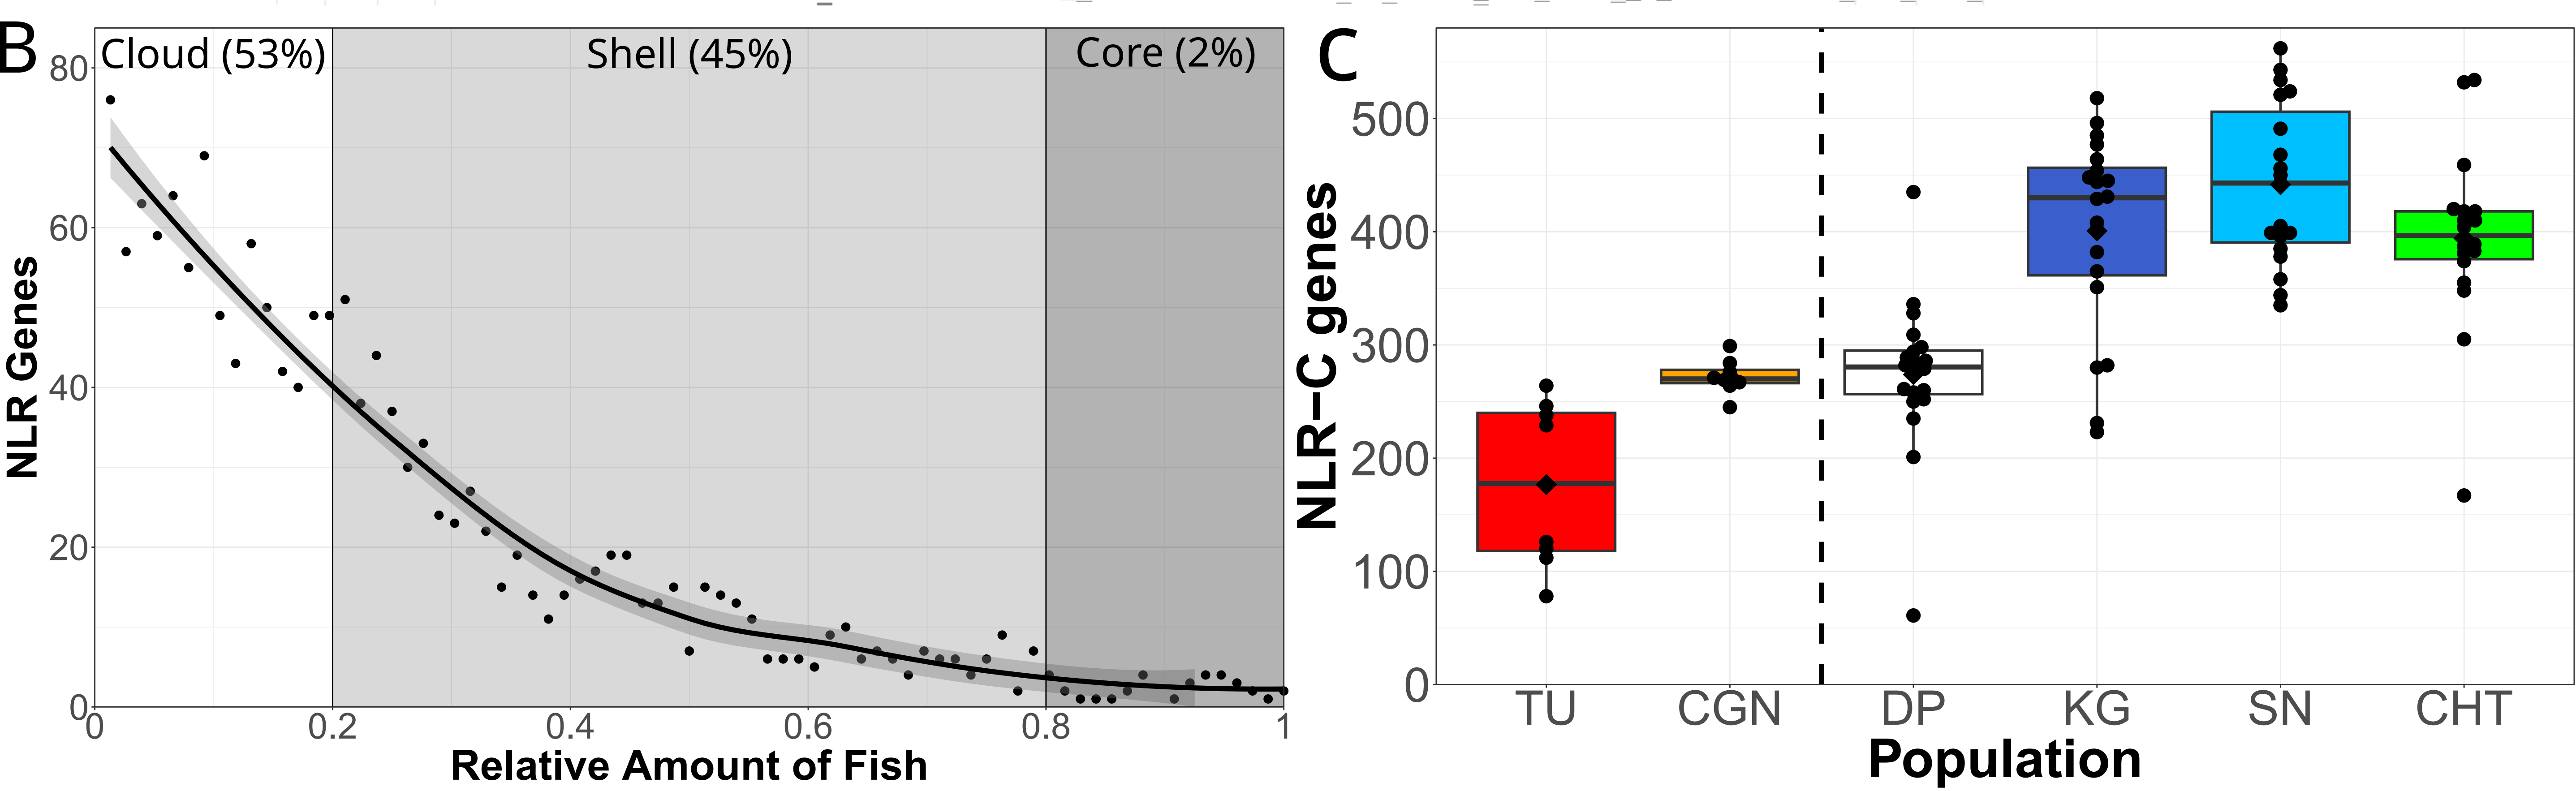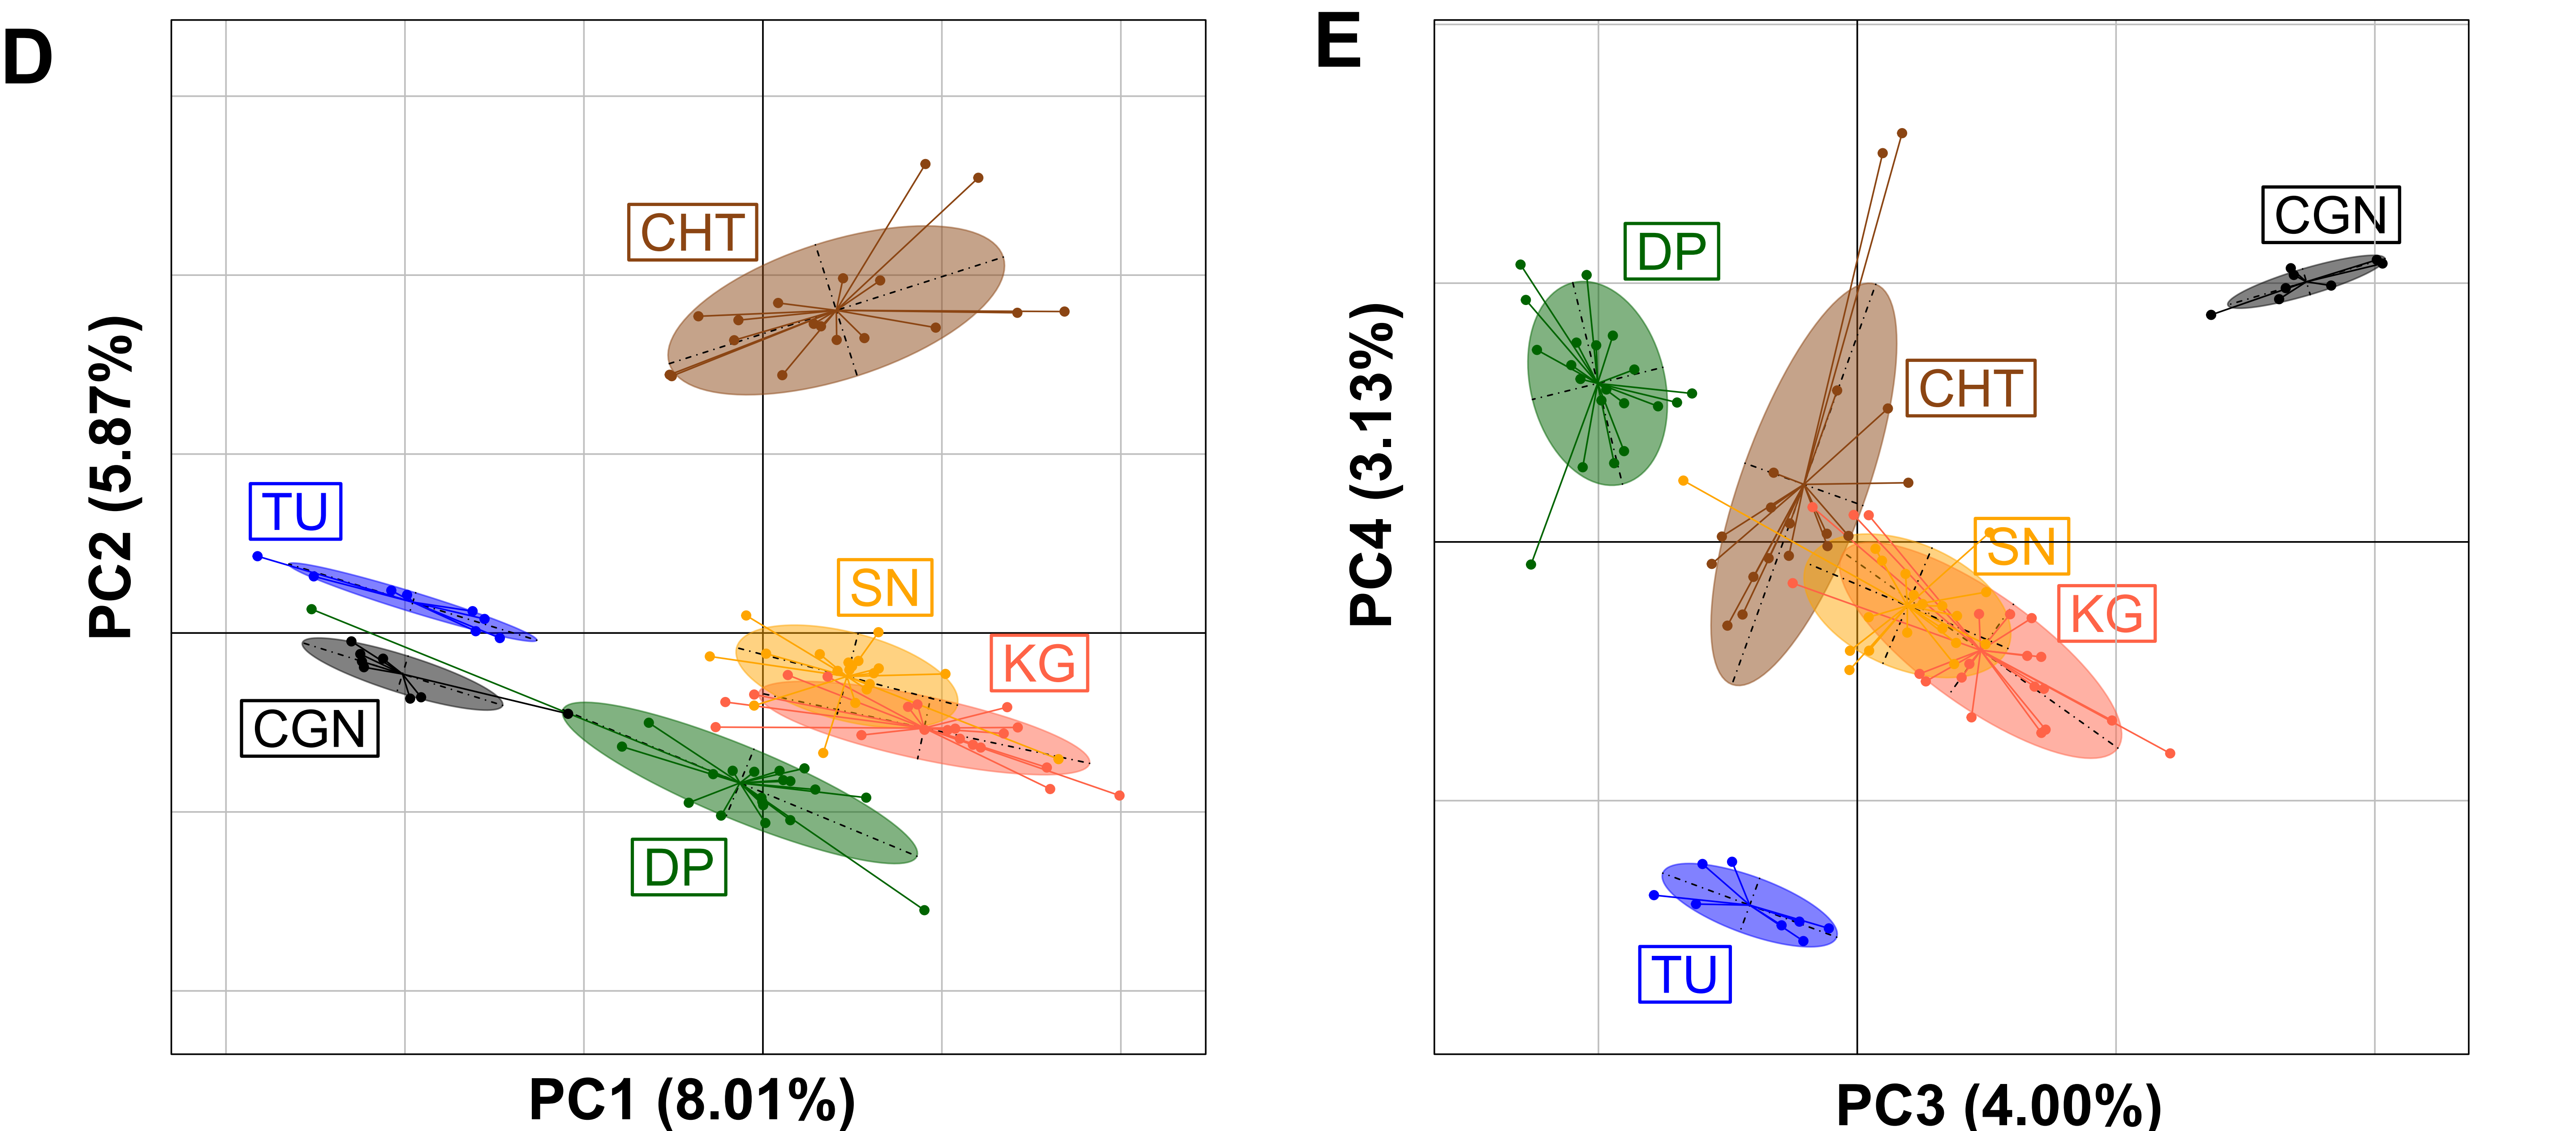

Supplement: supp [file elife-98058-supp-v1.zip]

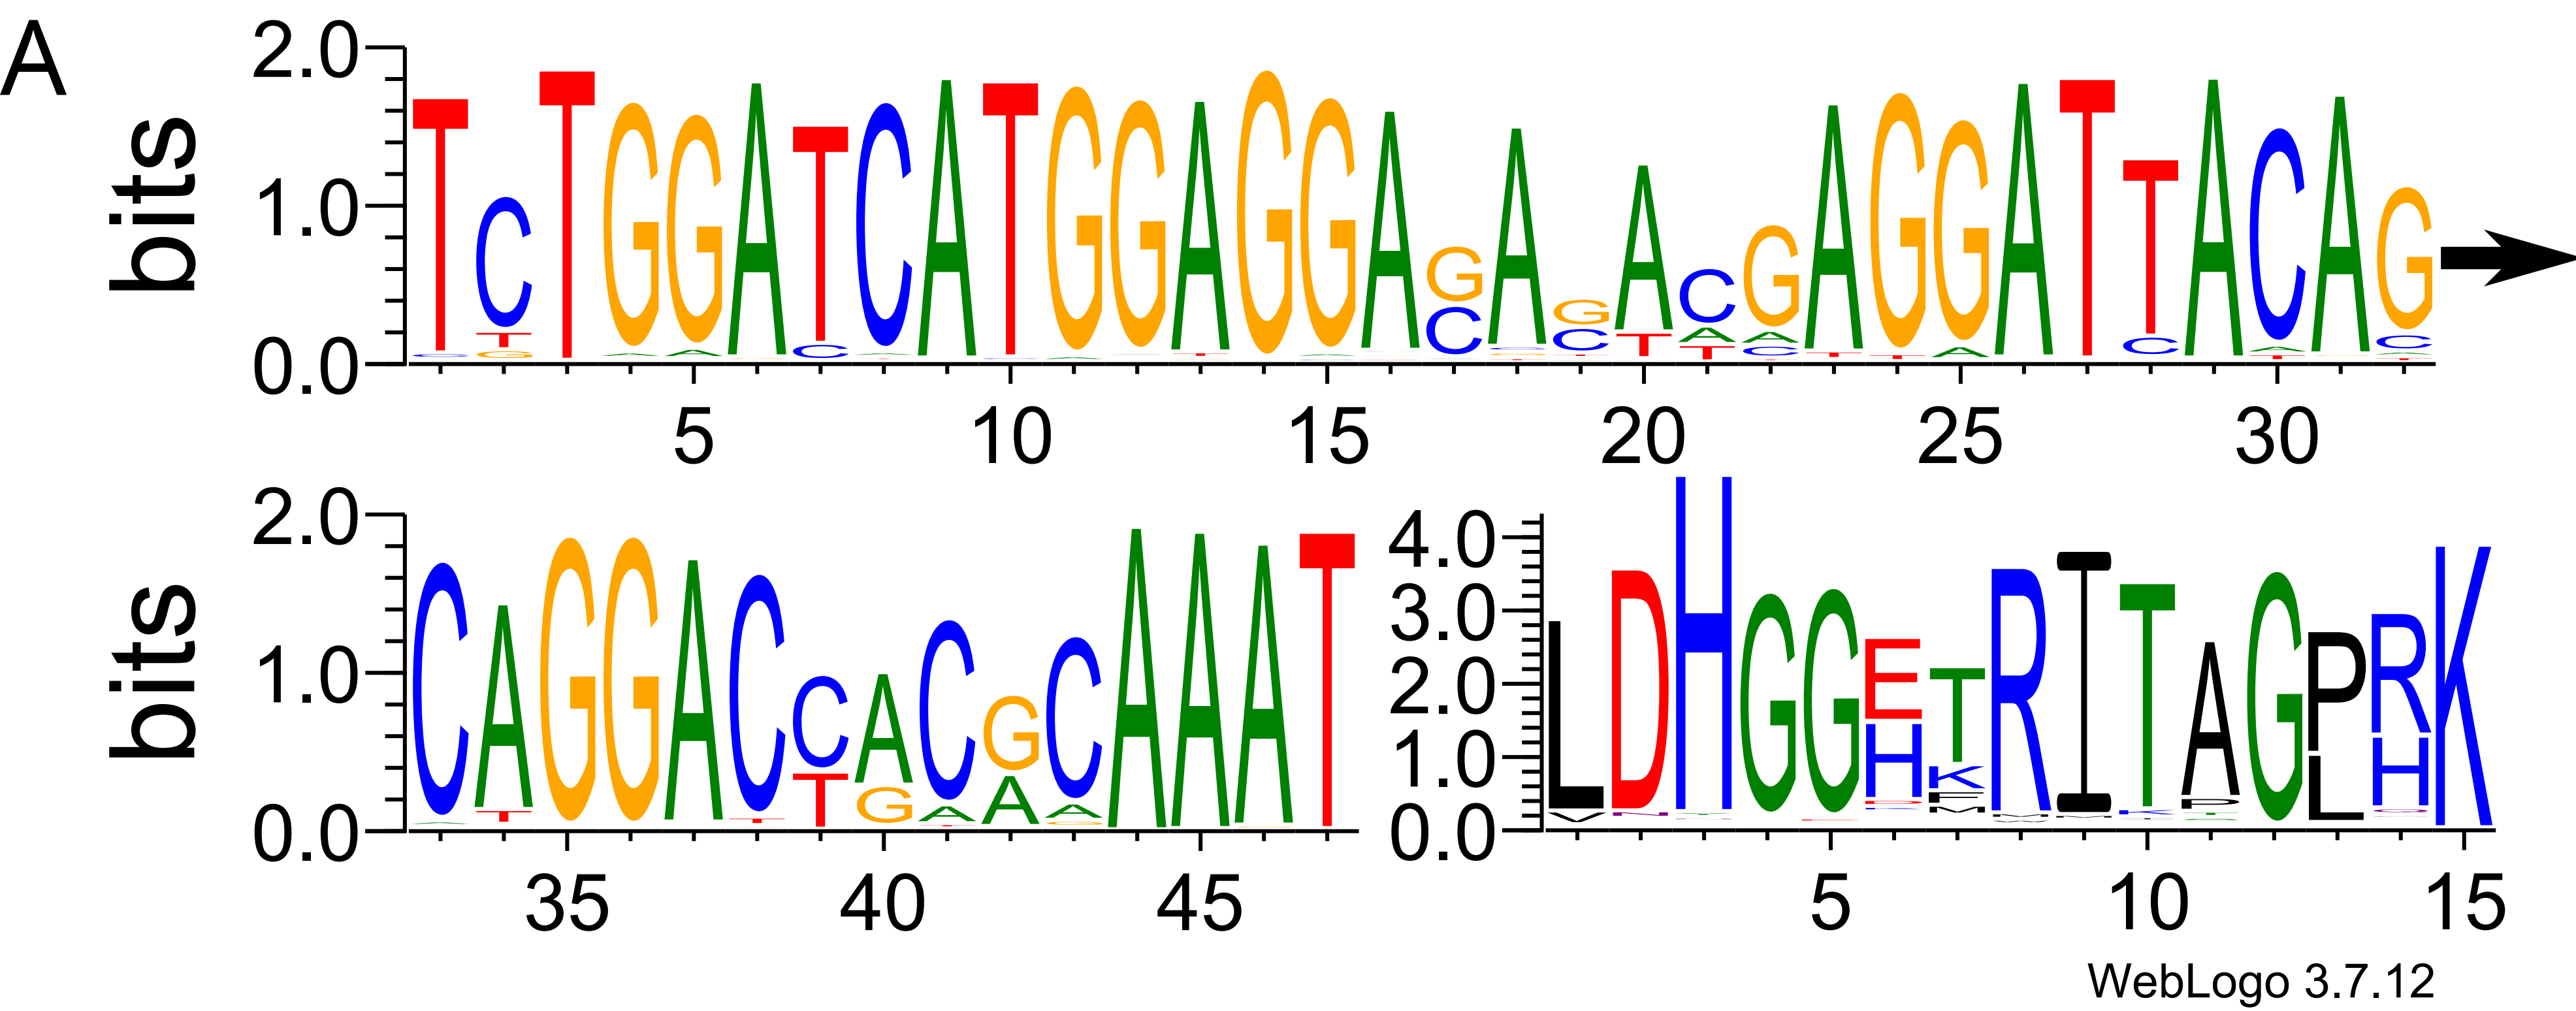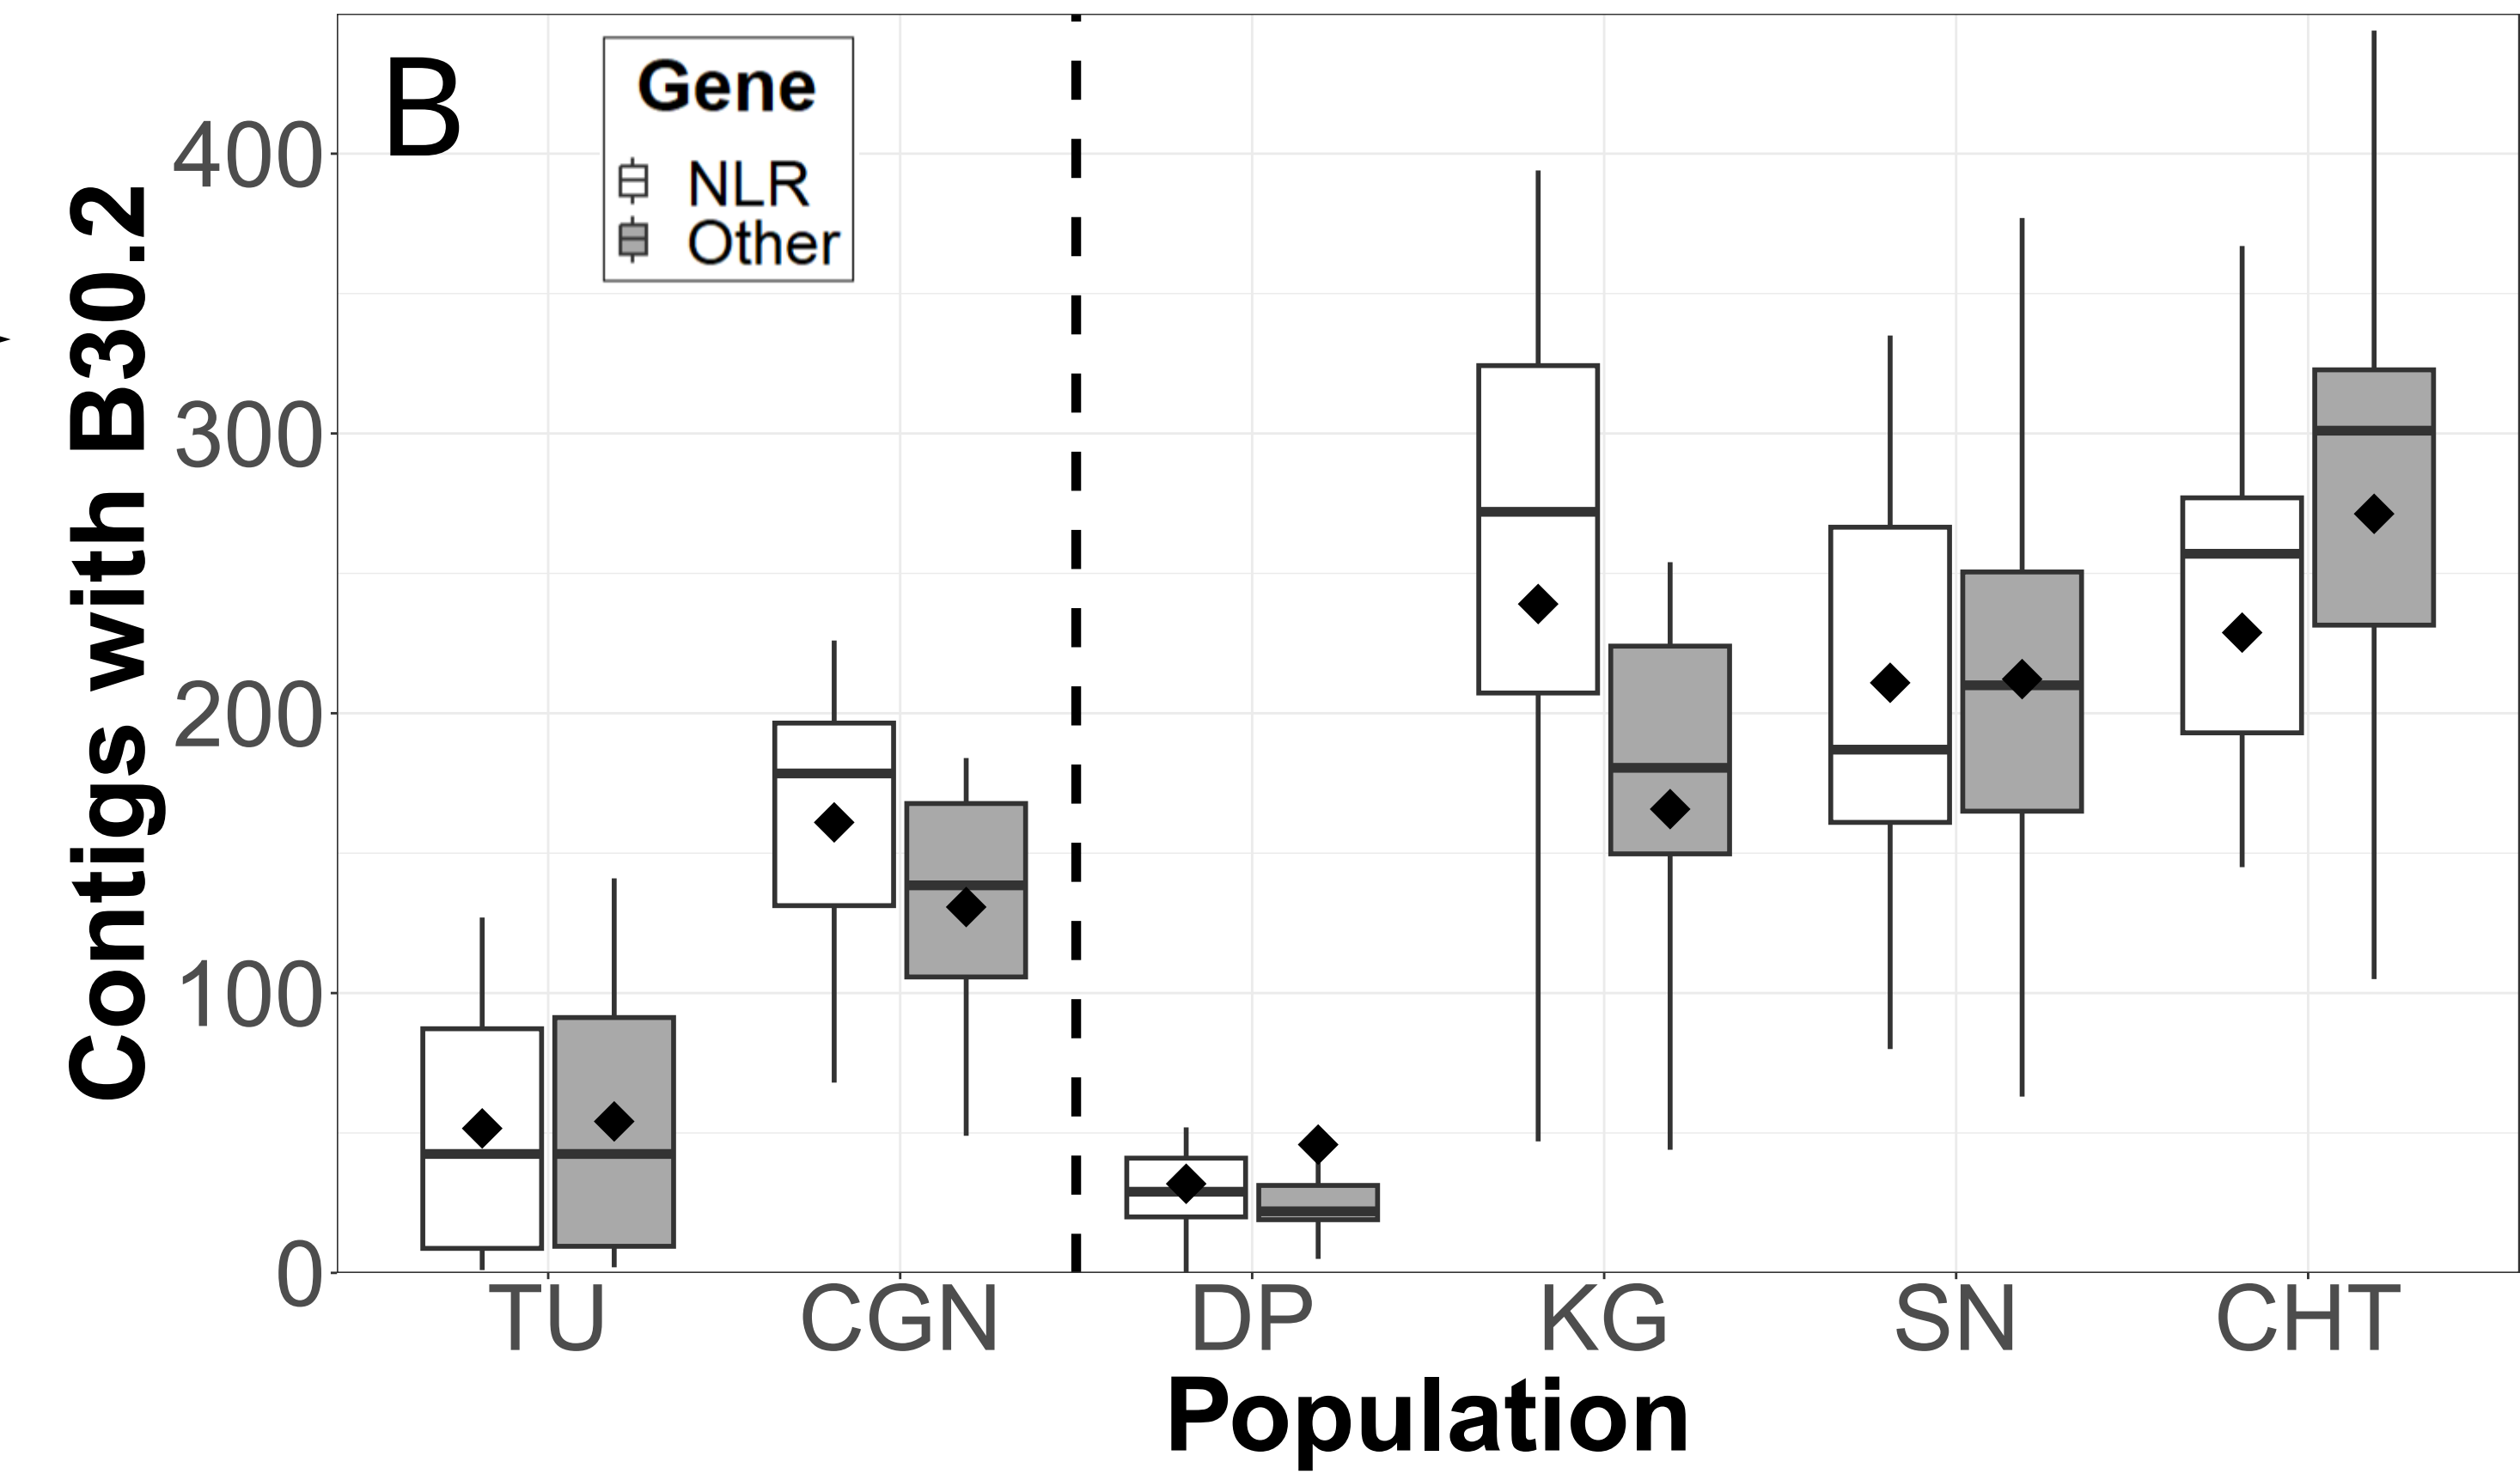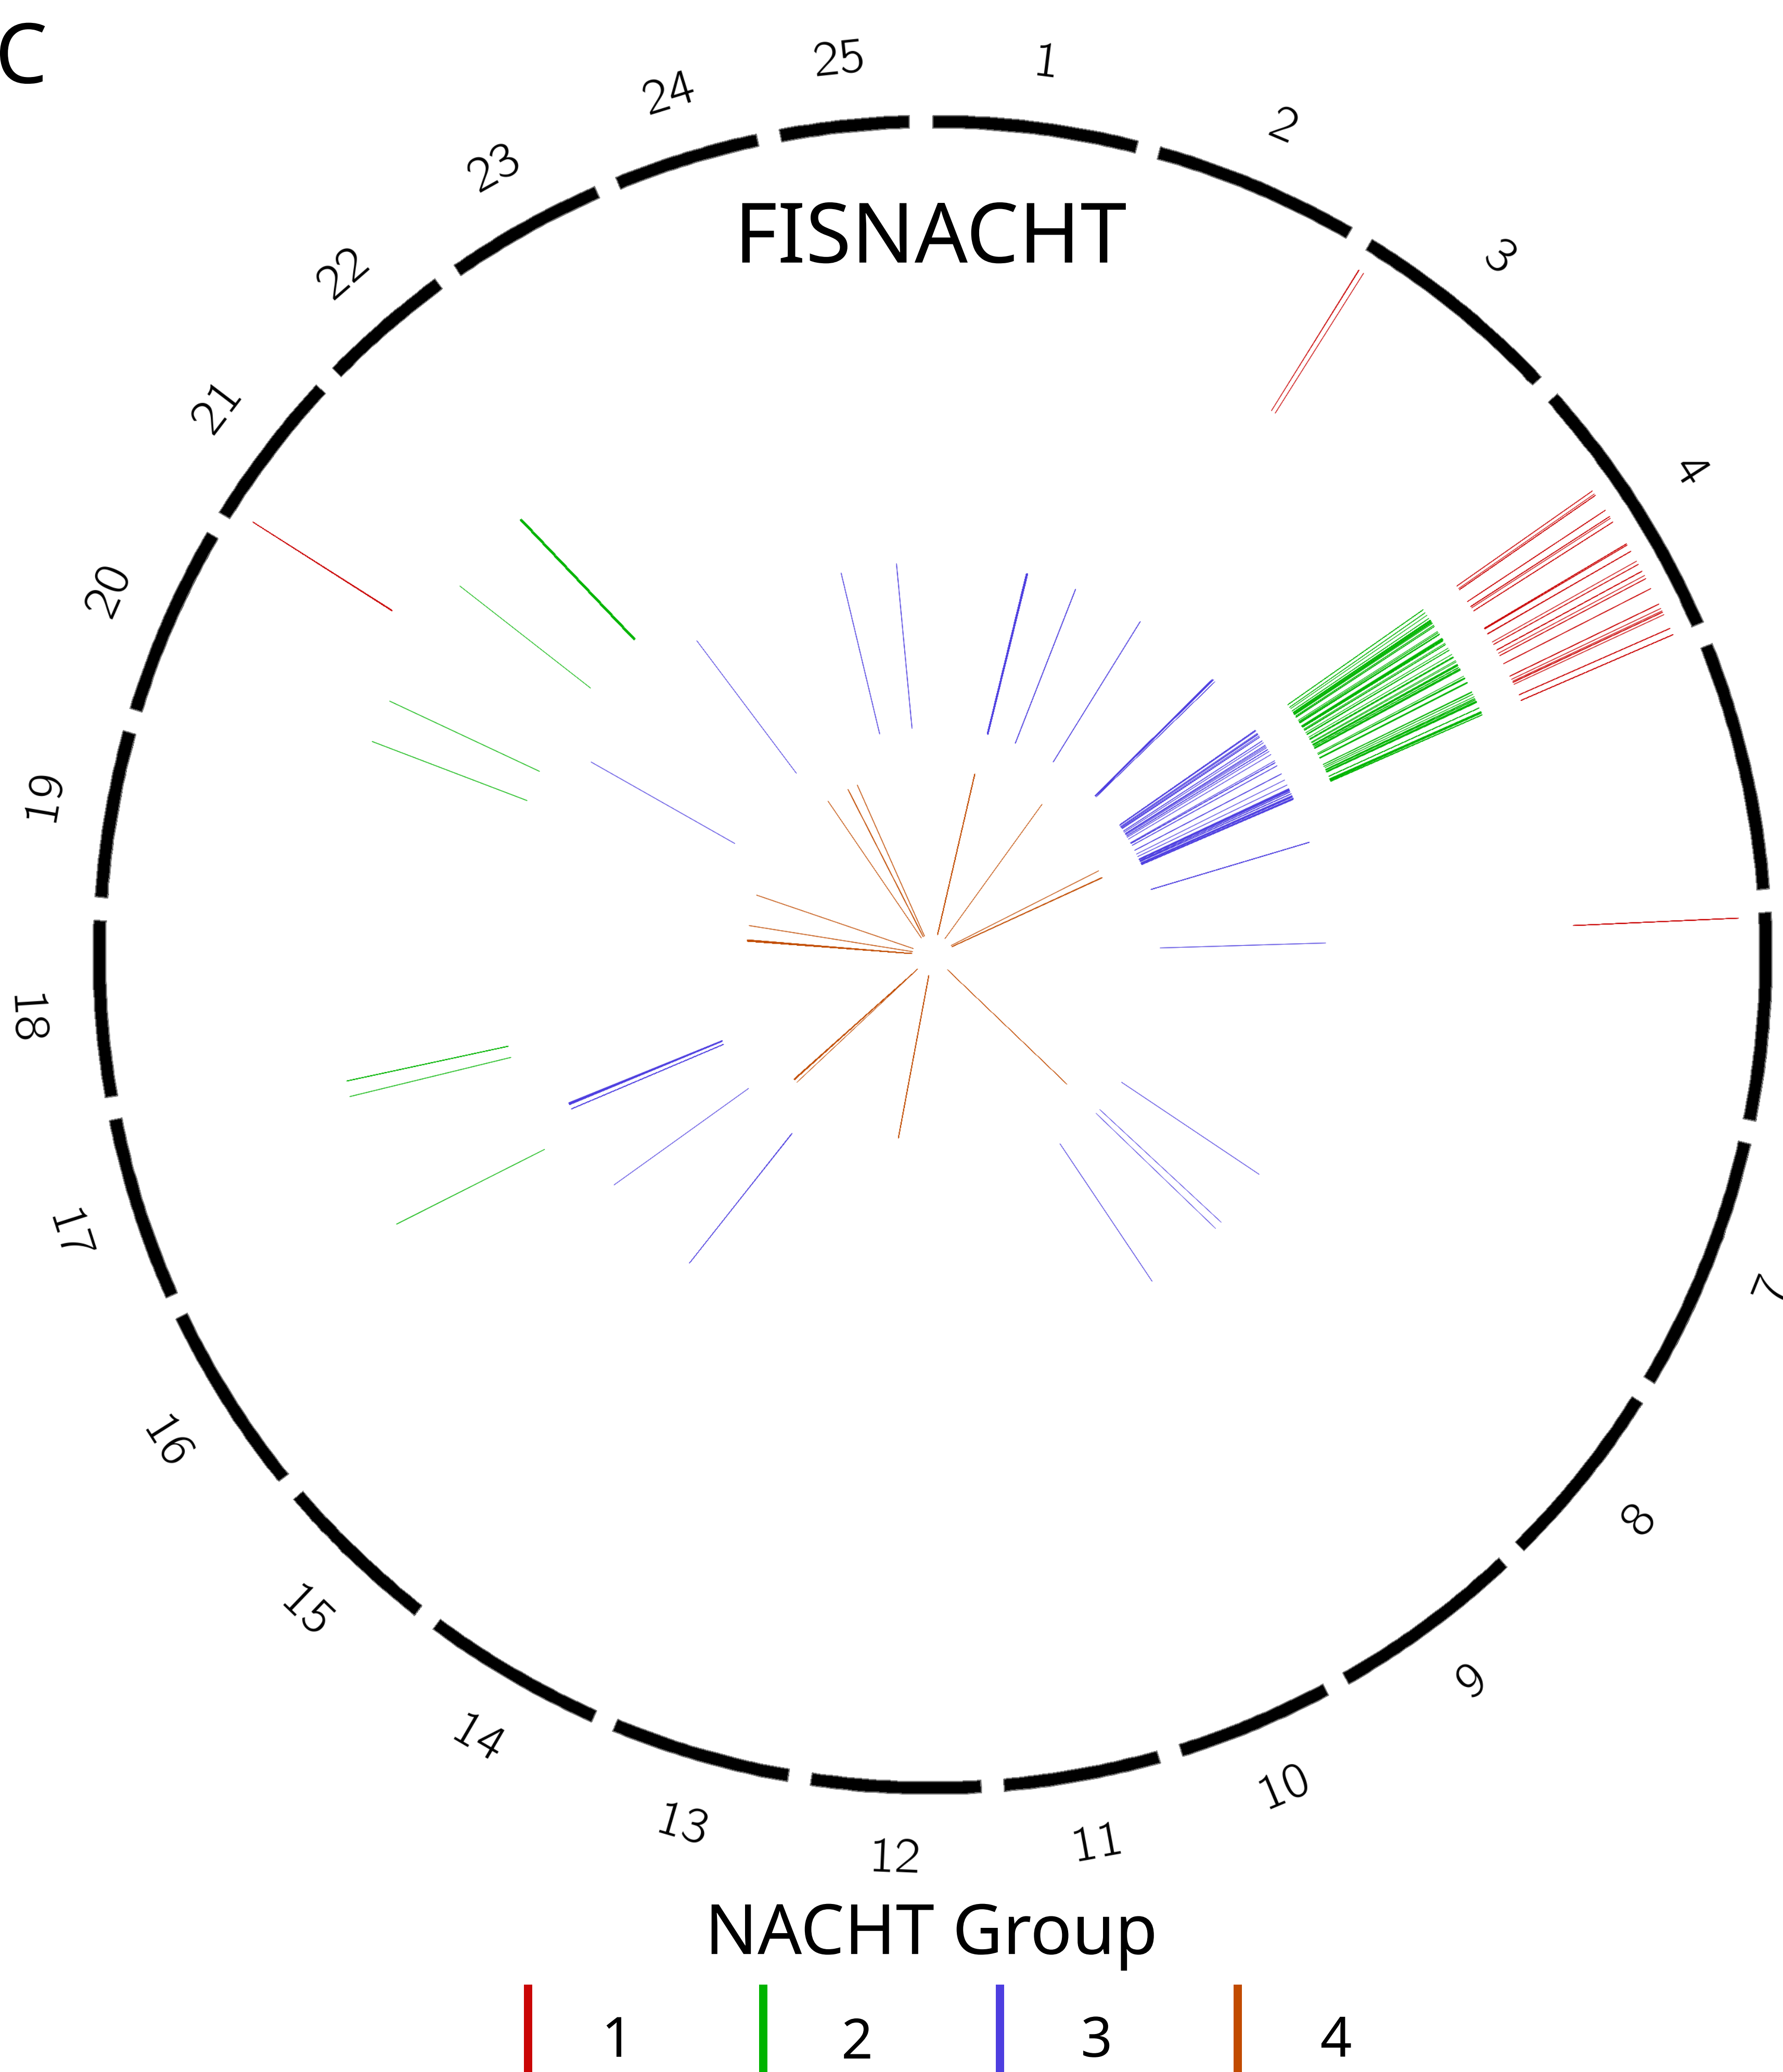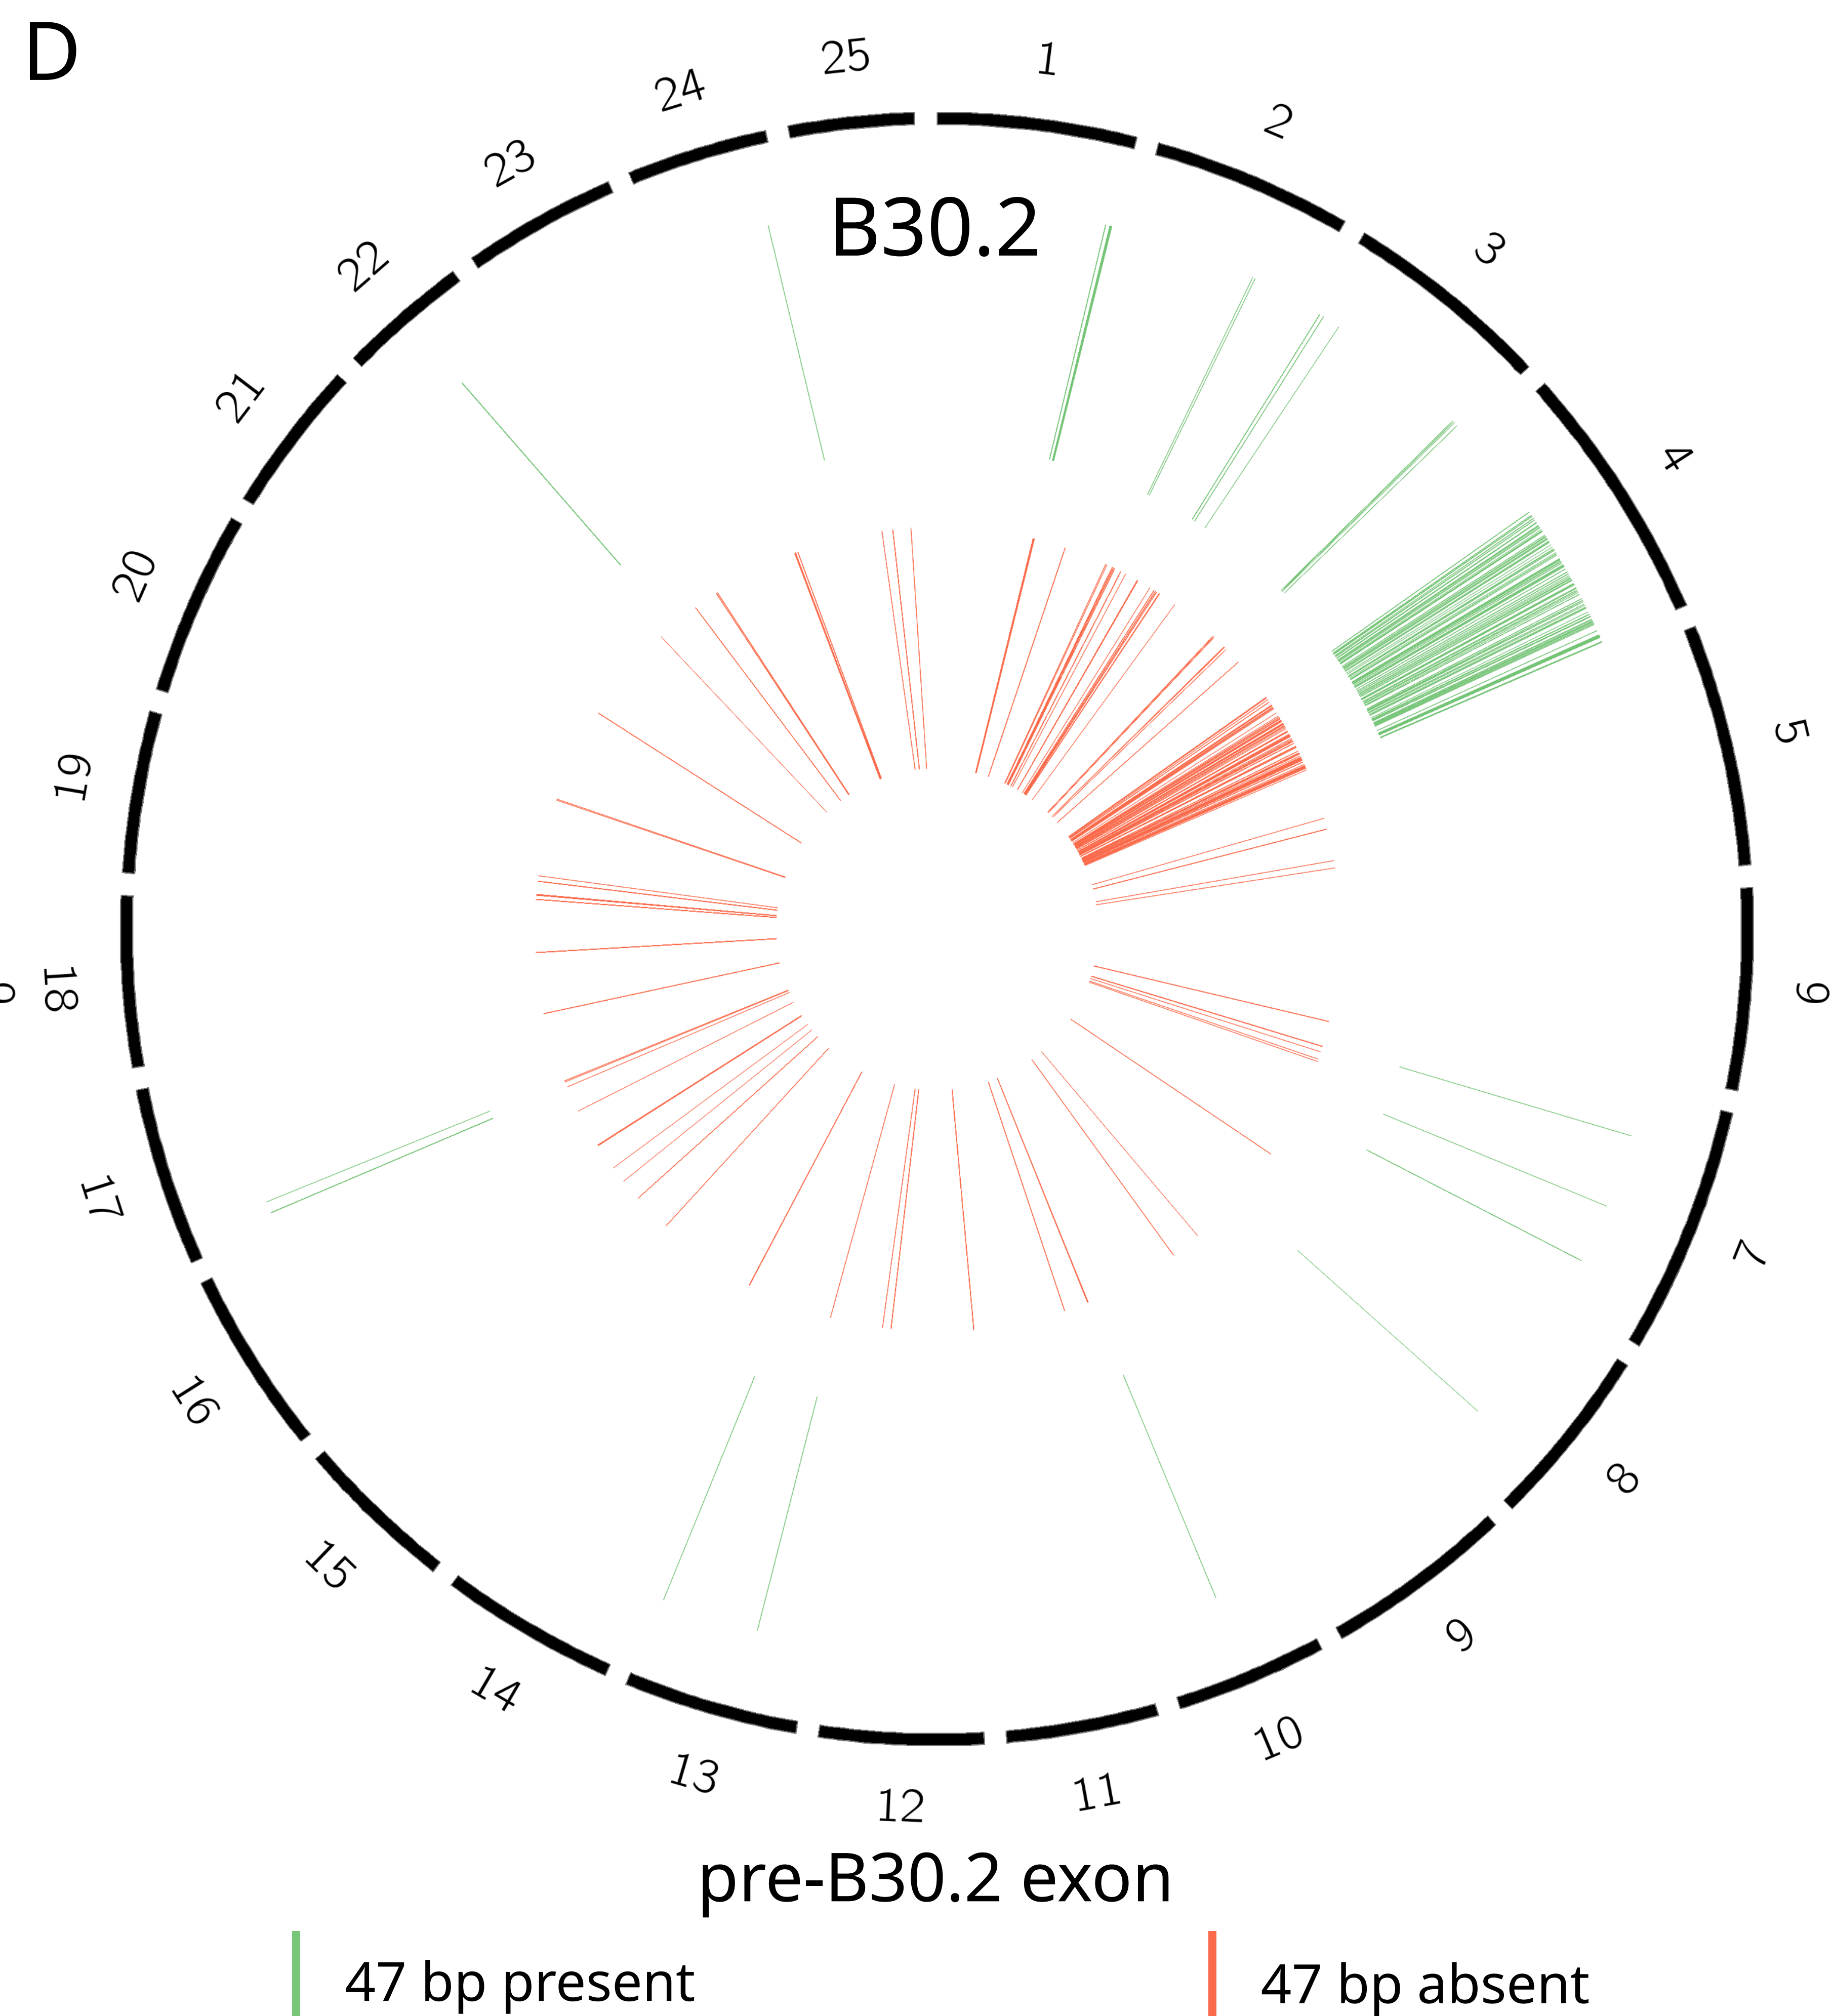

Supplement: supp [file elife-98058-supp-v1.zip]

# FISNA-NACHT

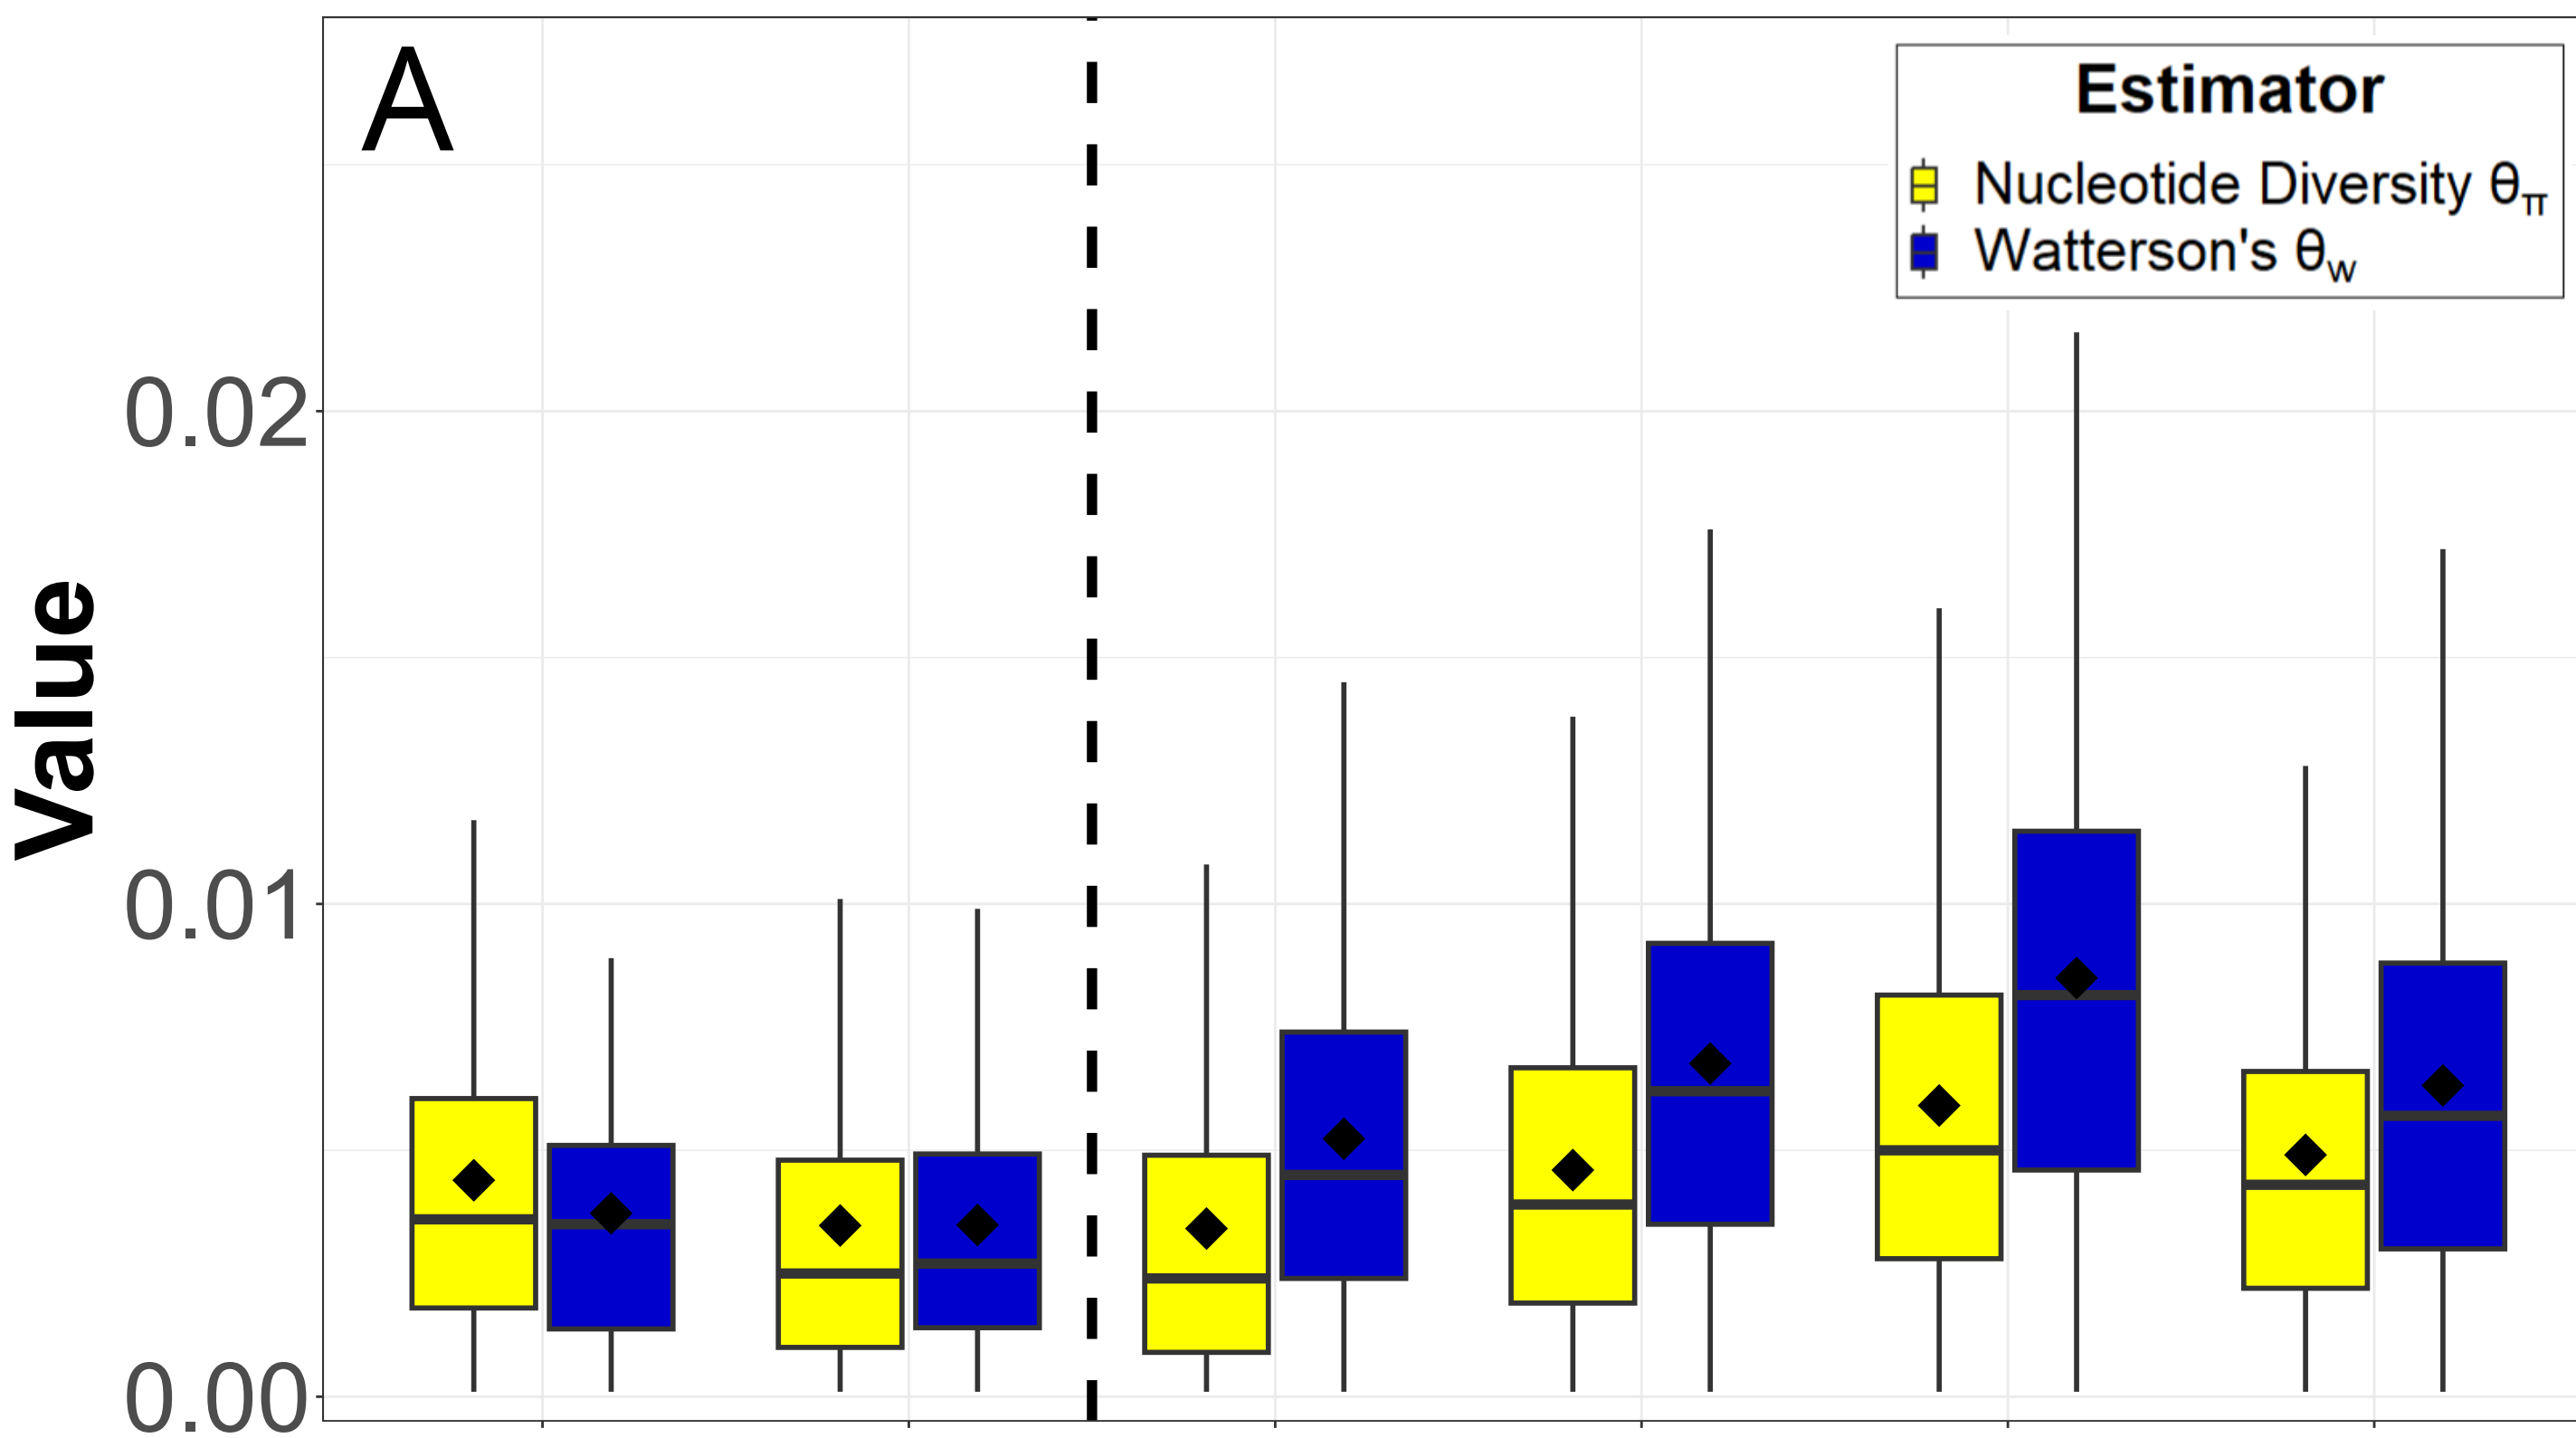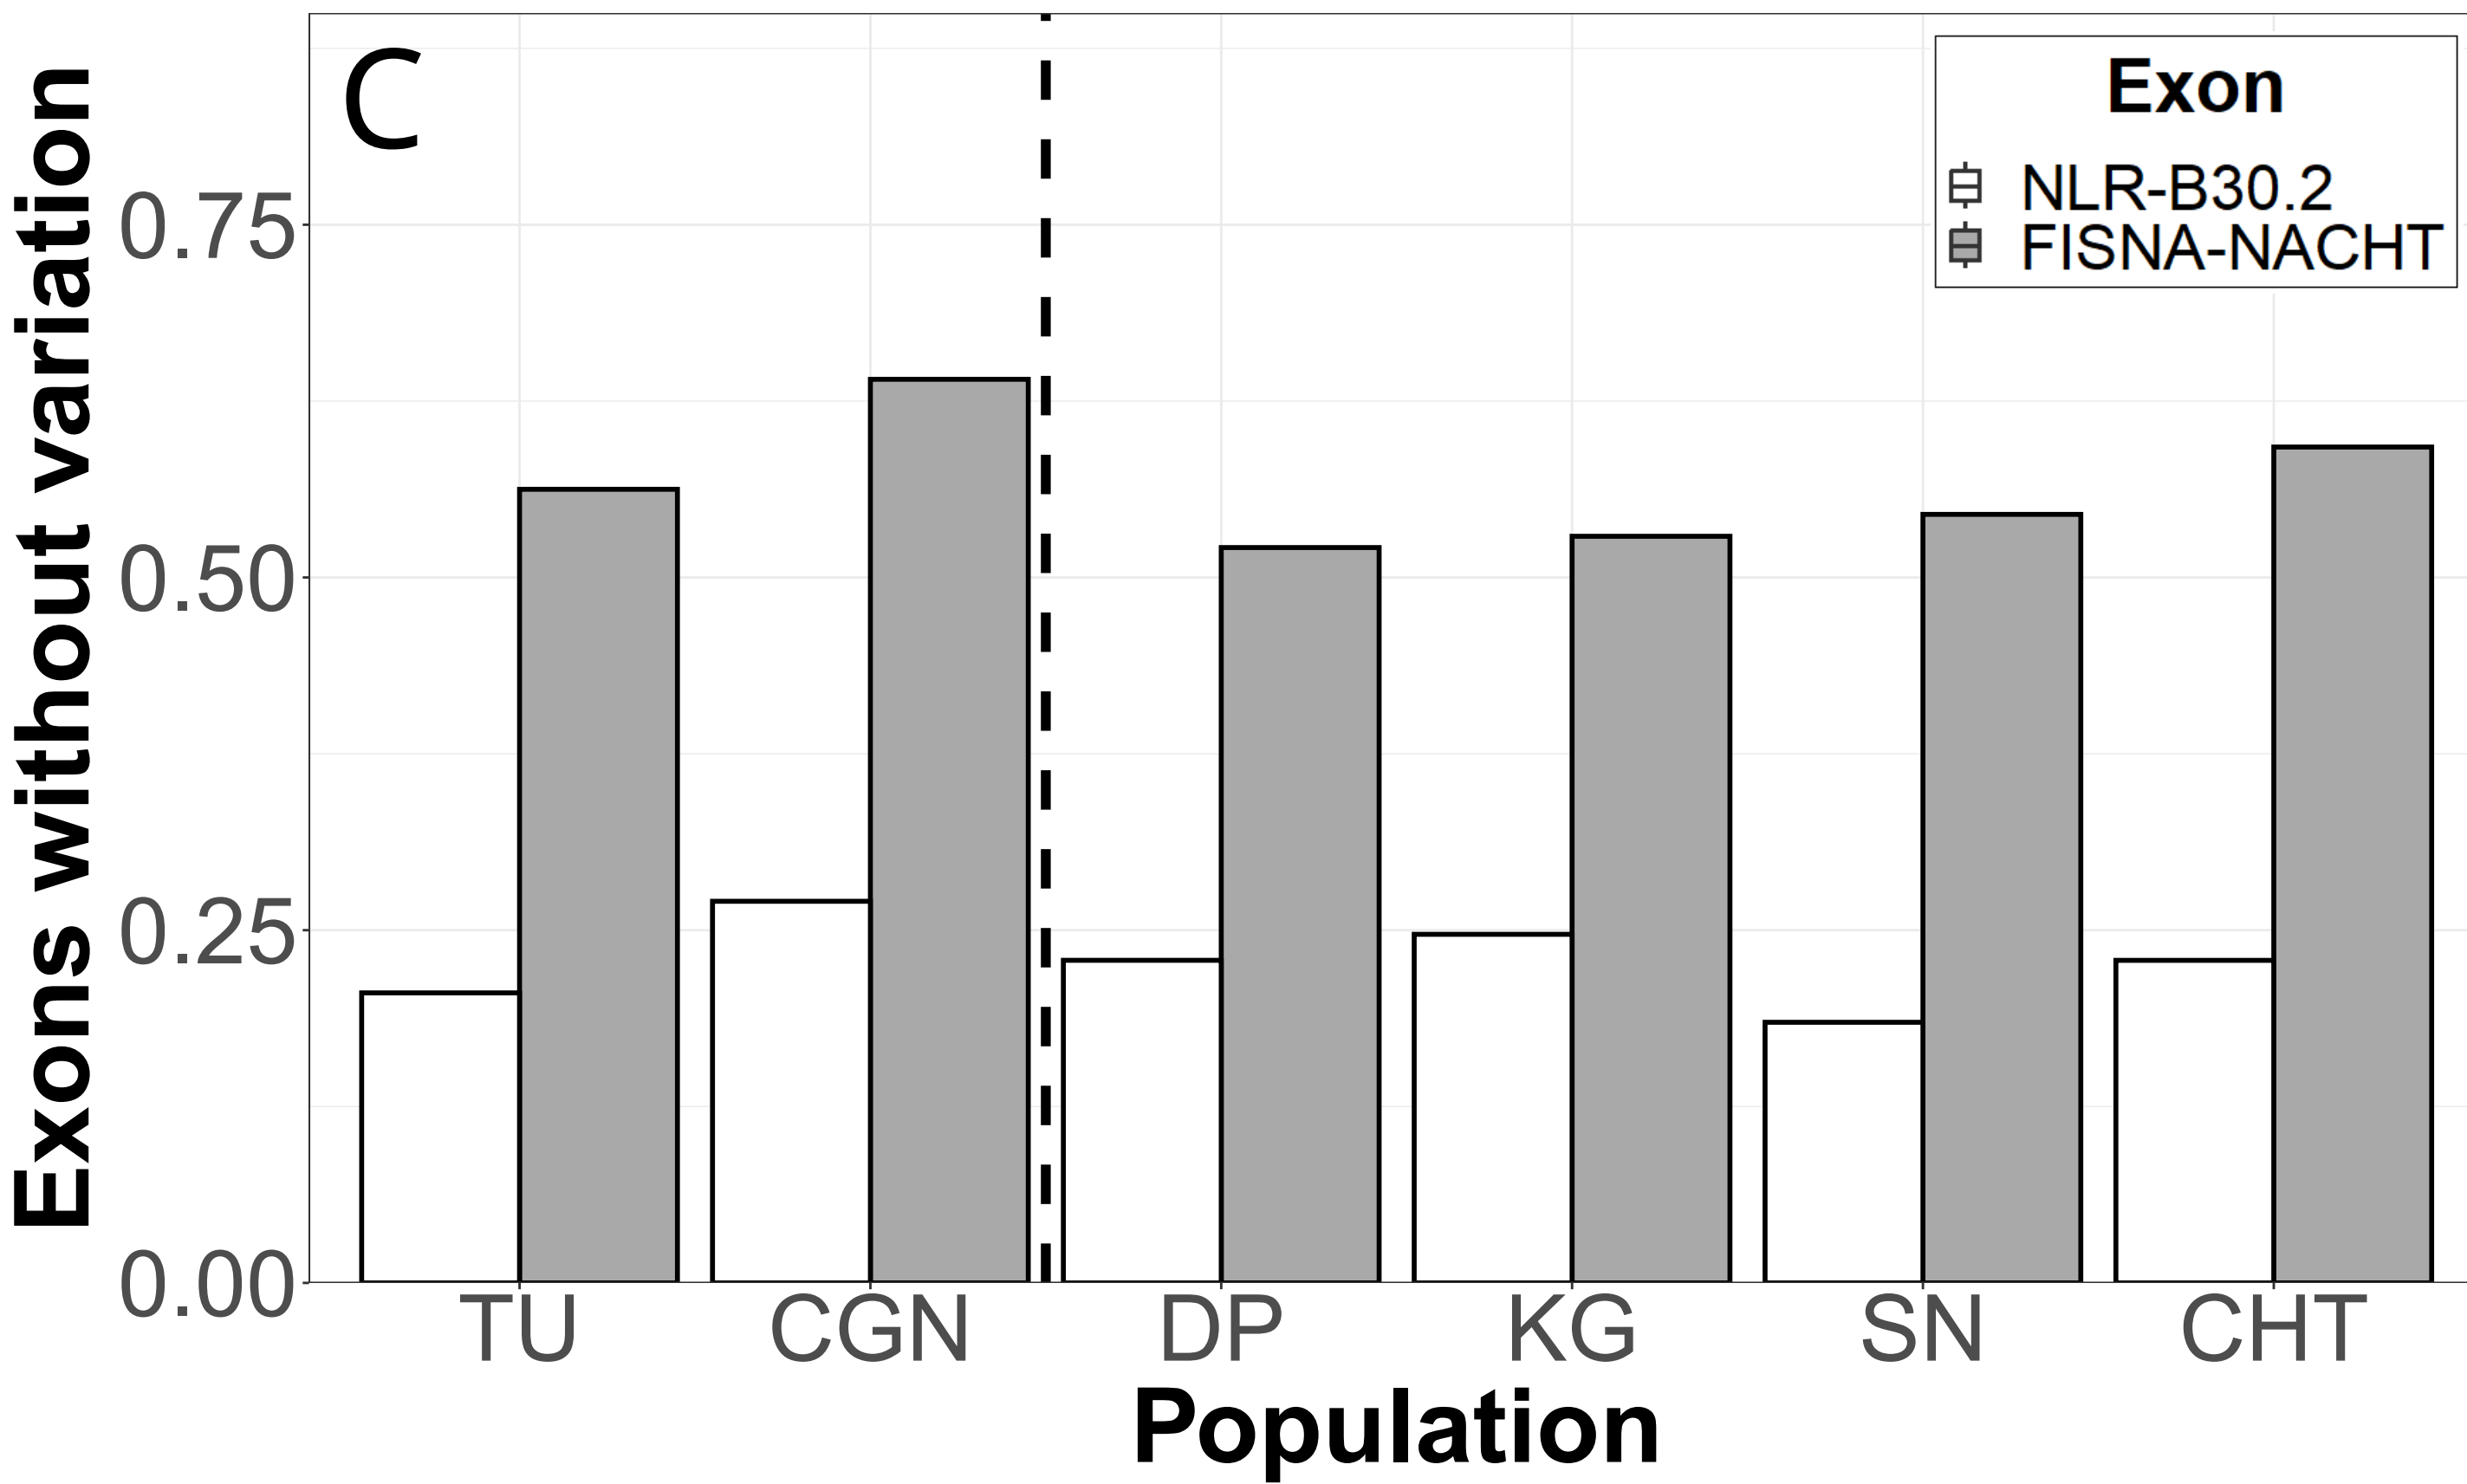

# NLR-B30.2

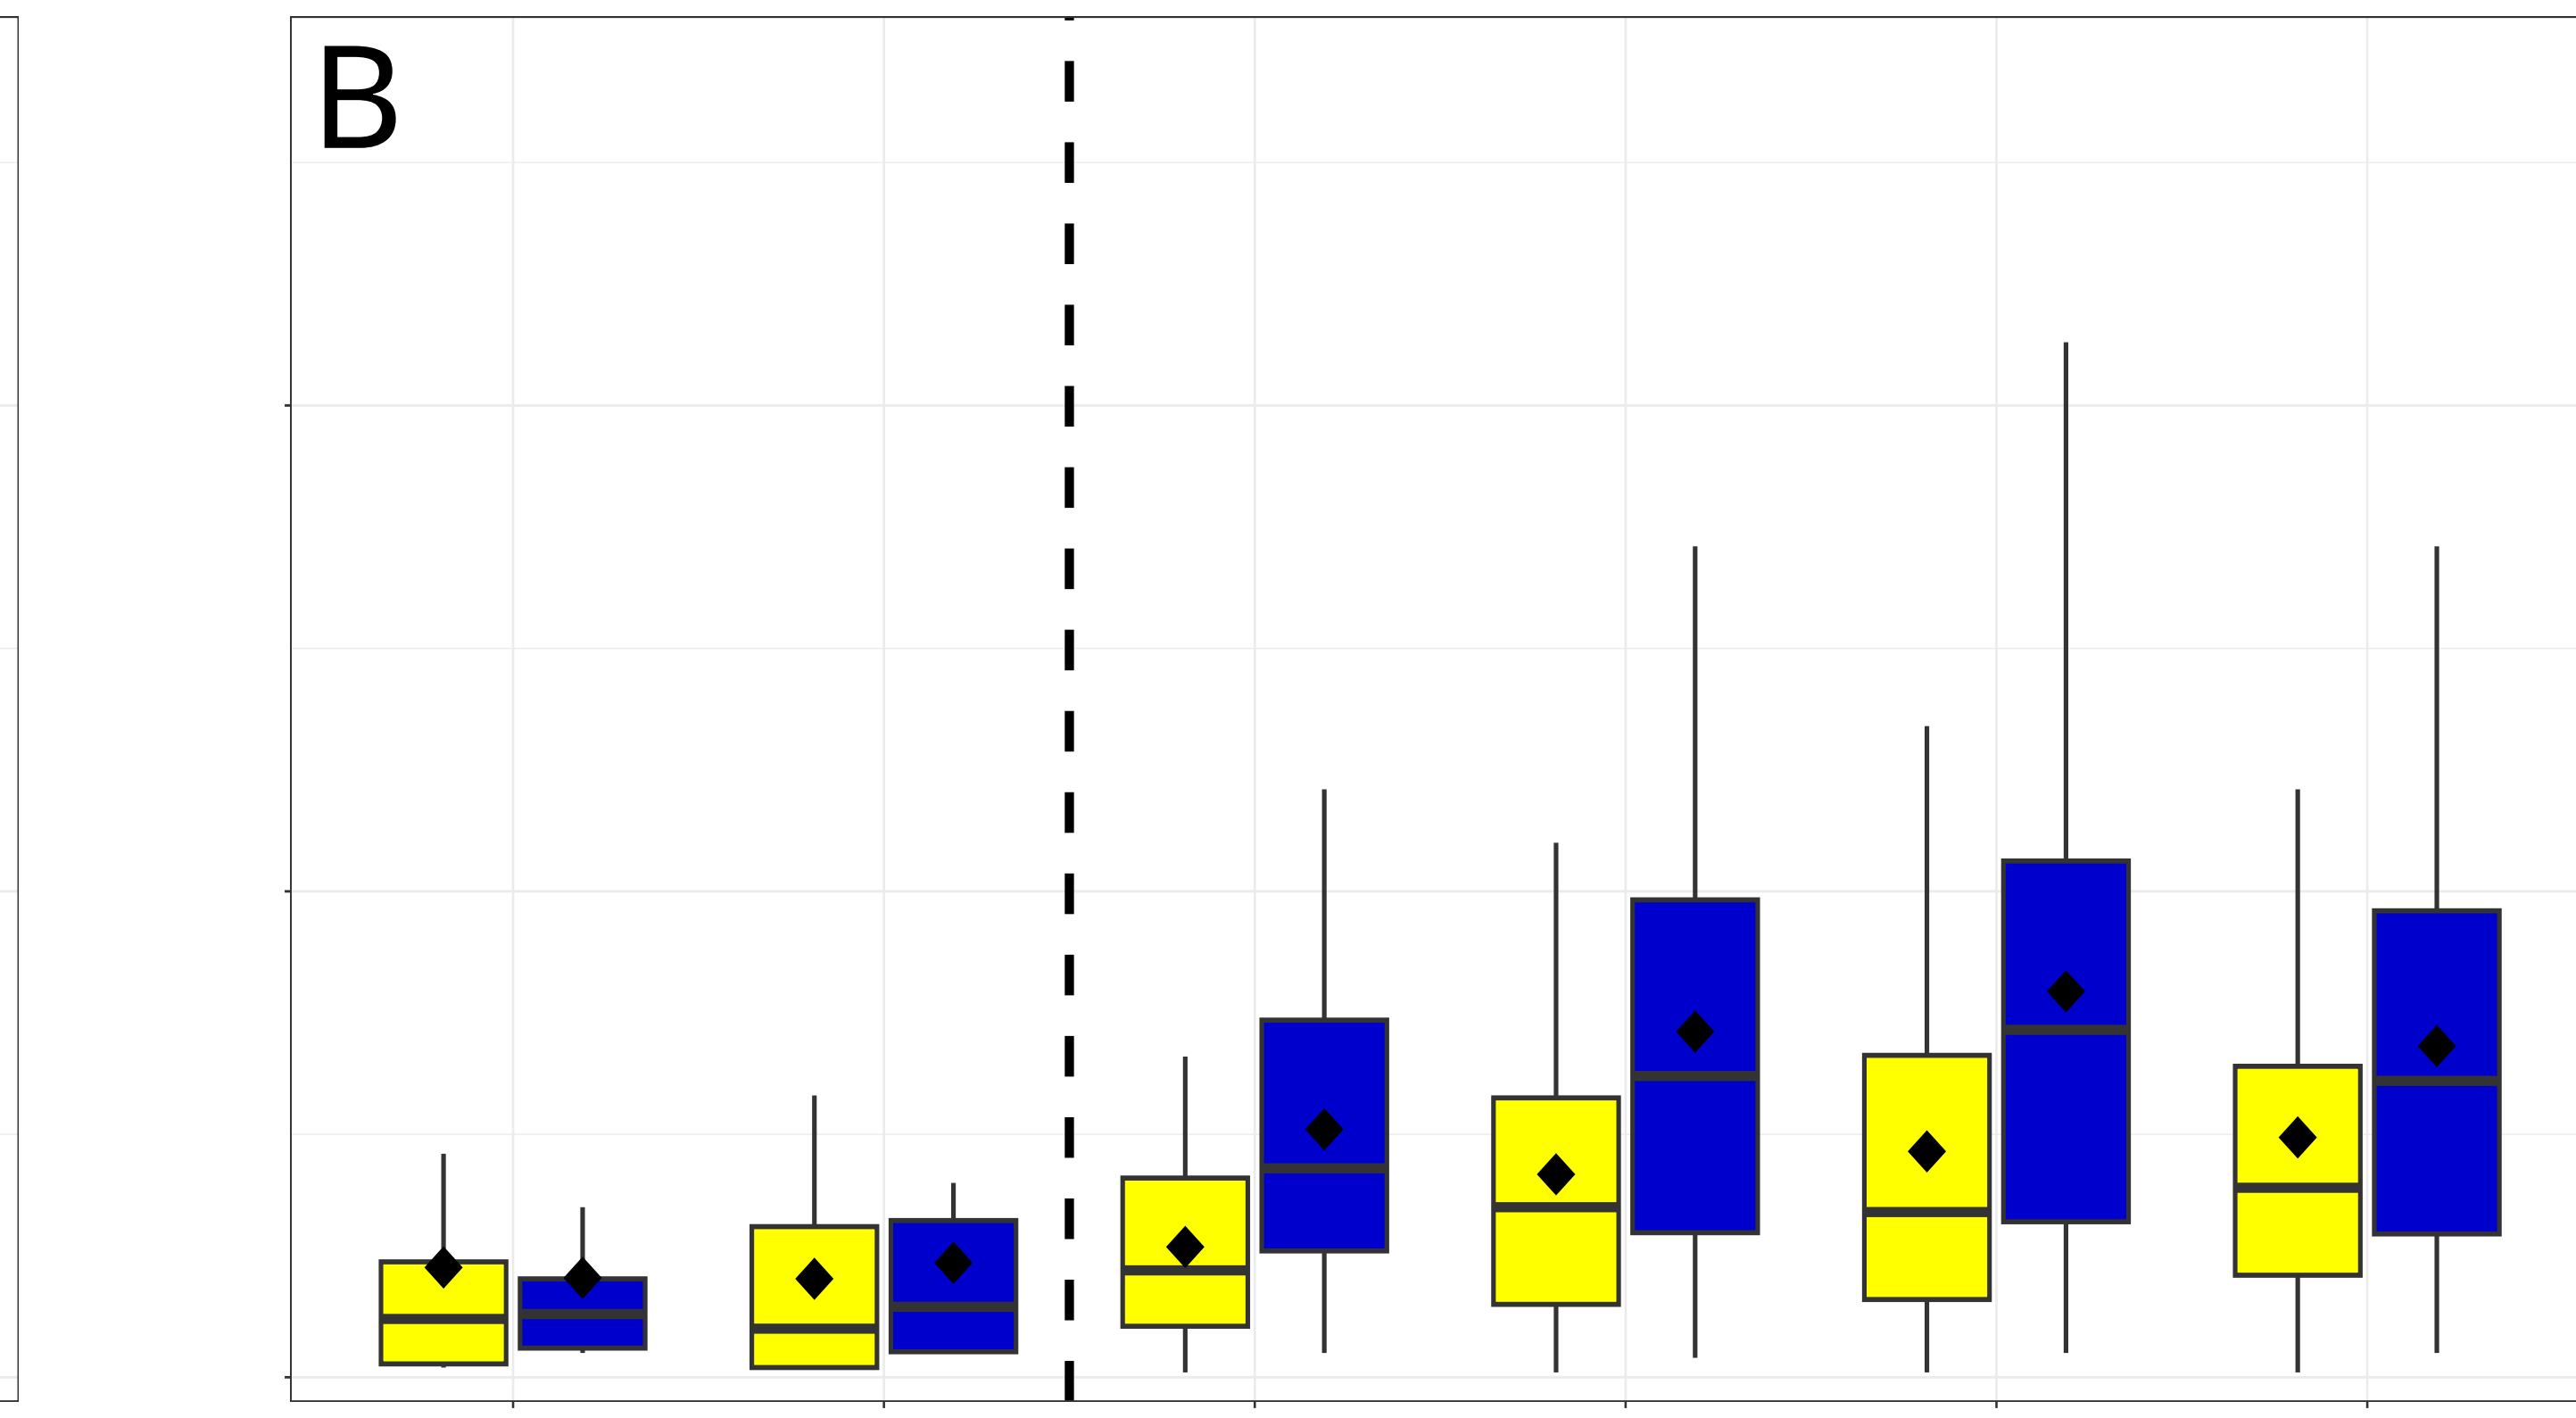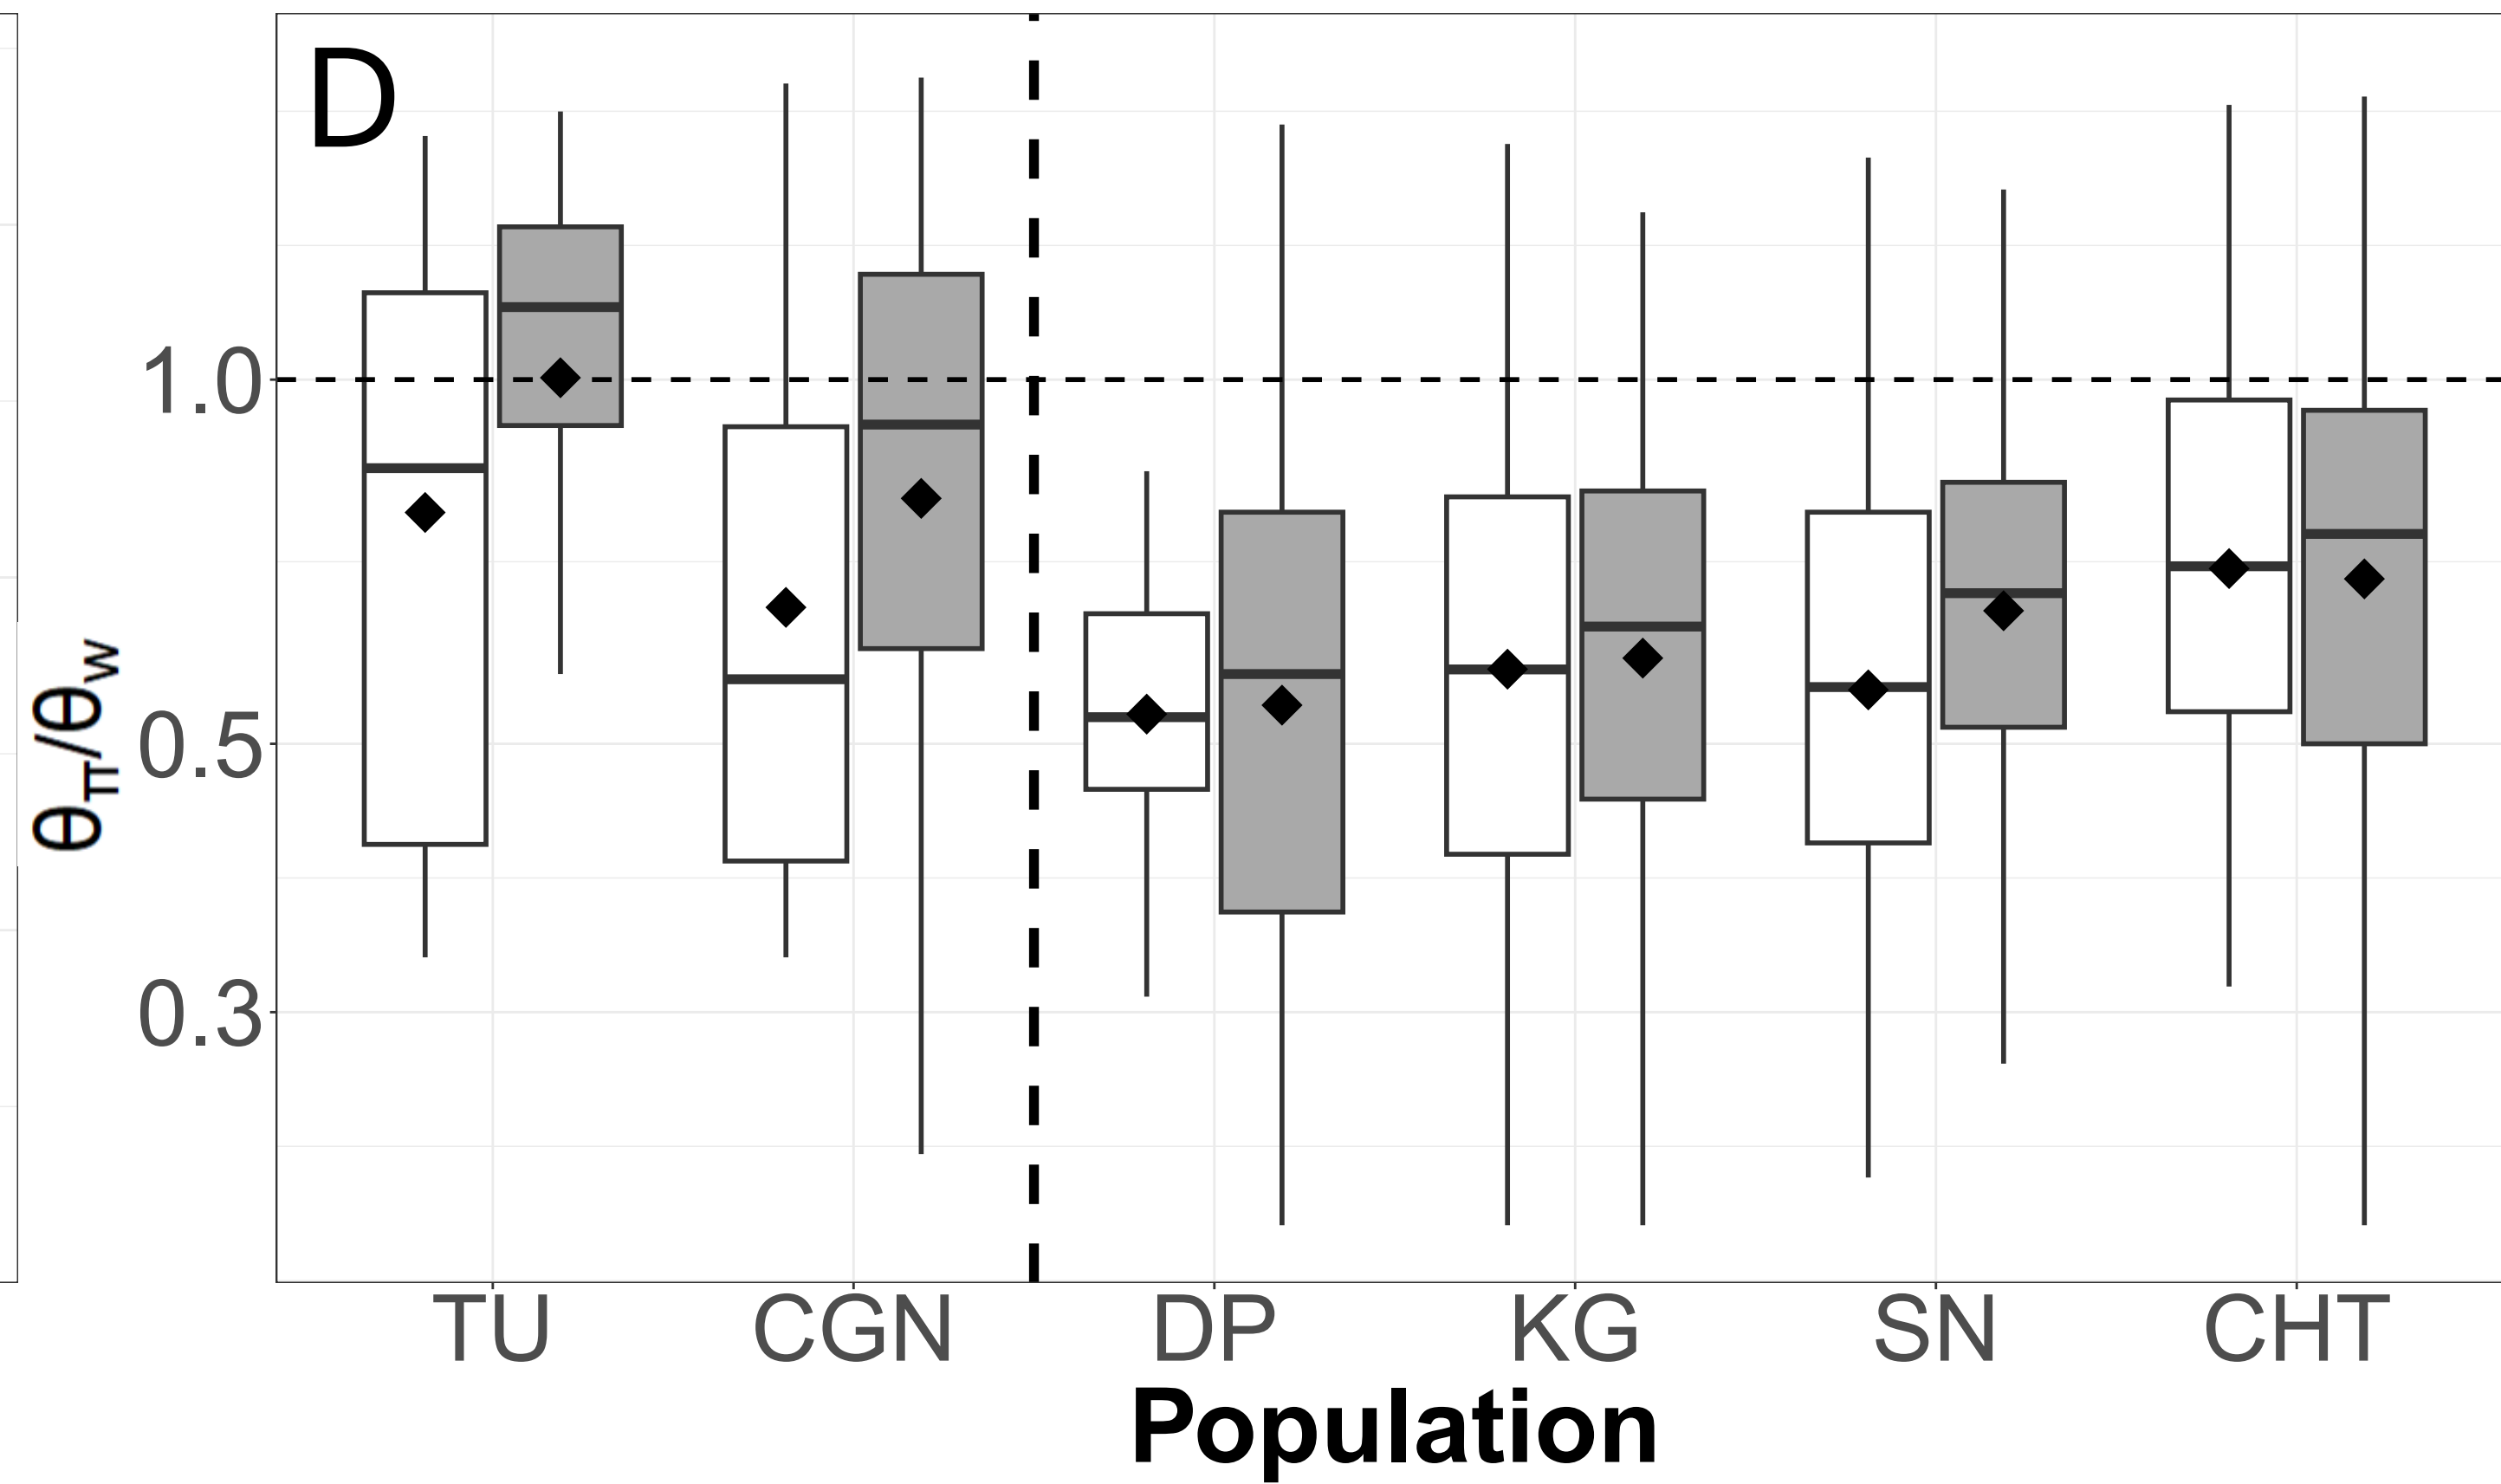

Supplement: supp [file elife-98058-supp-v1.zip]

# NLR reads with at least 3 passes

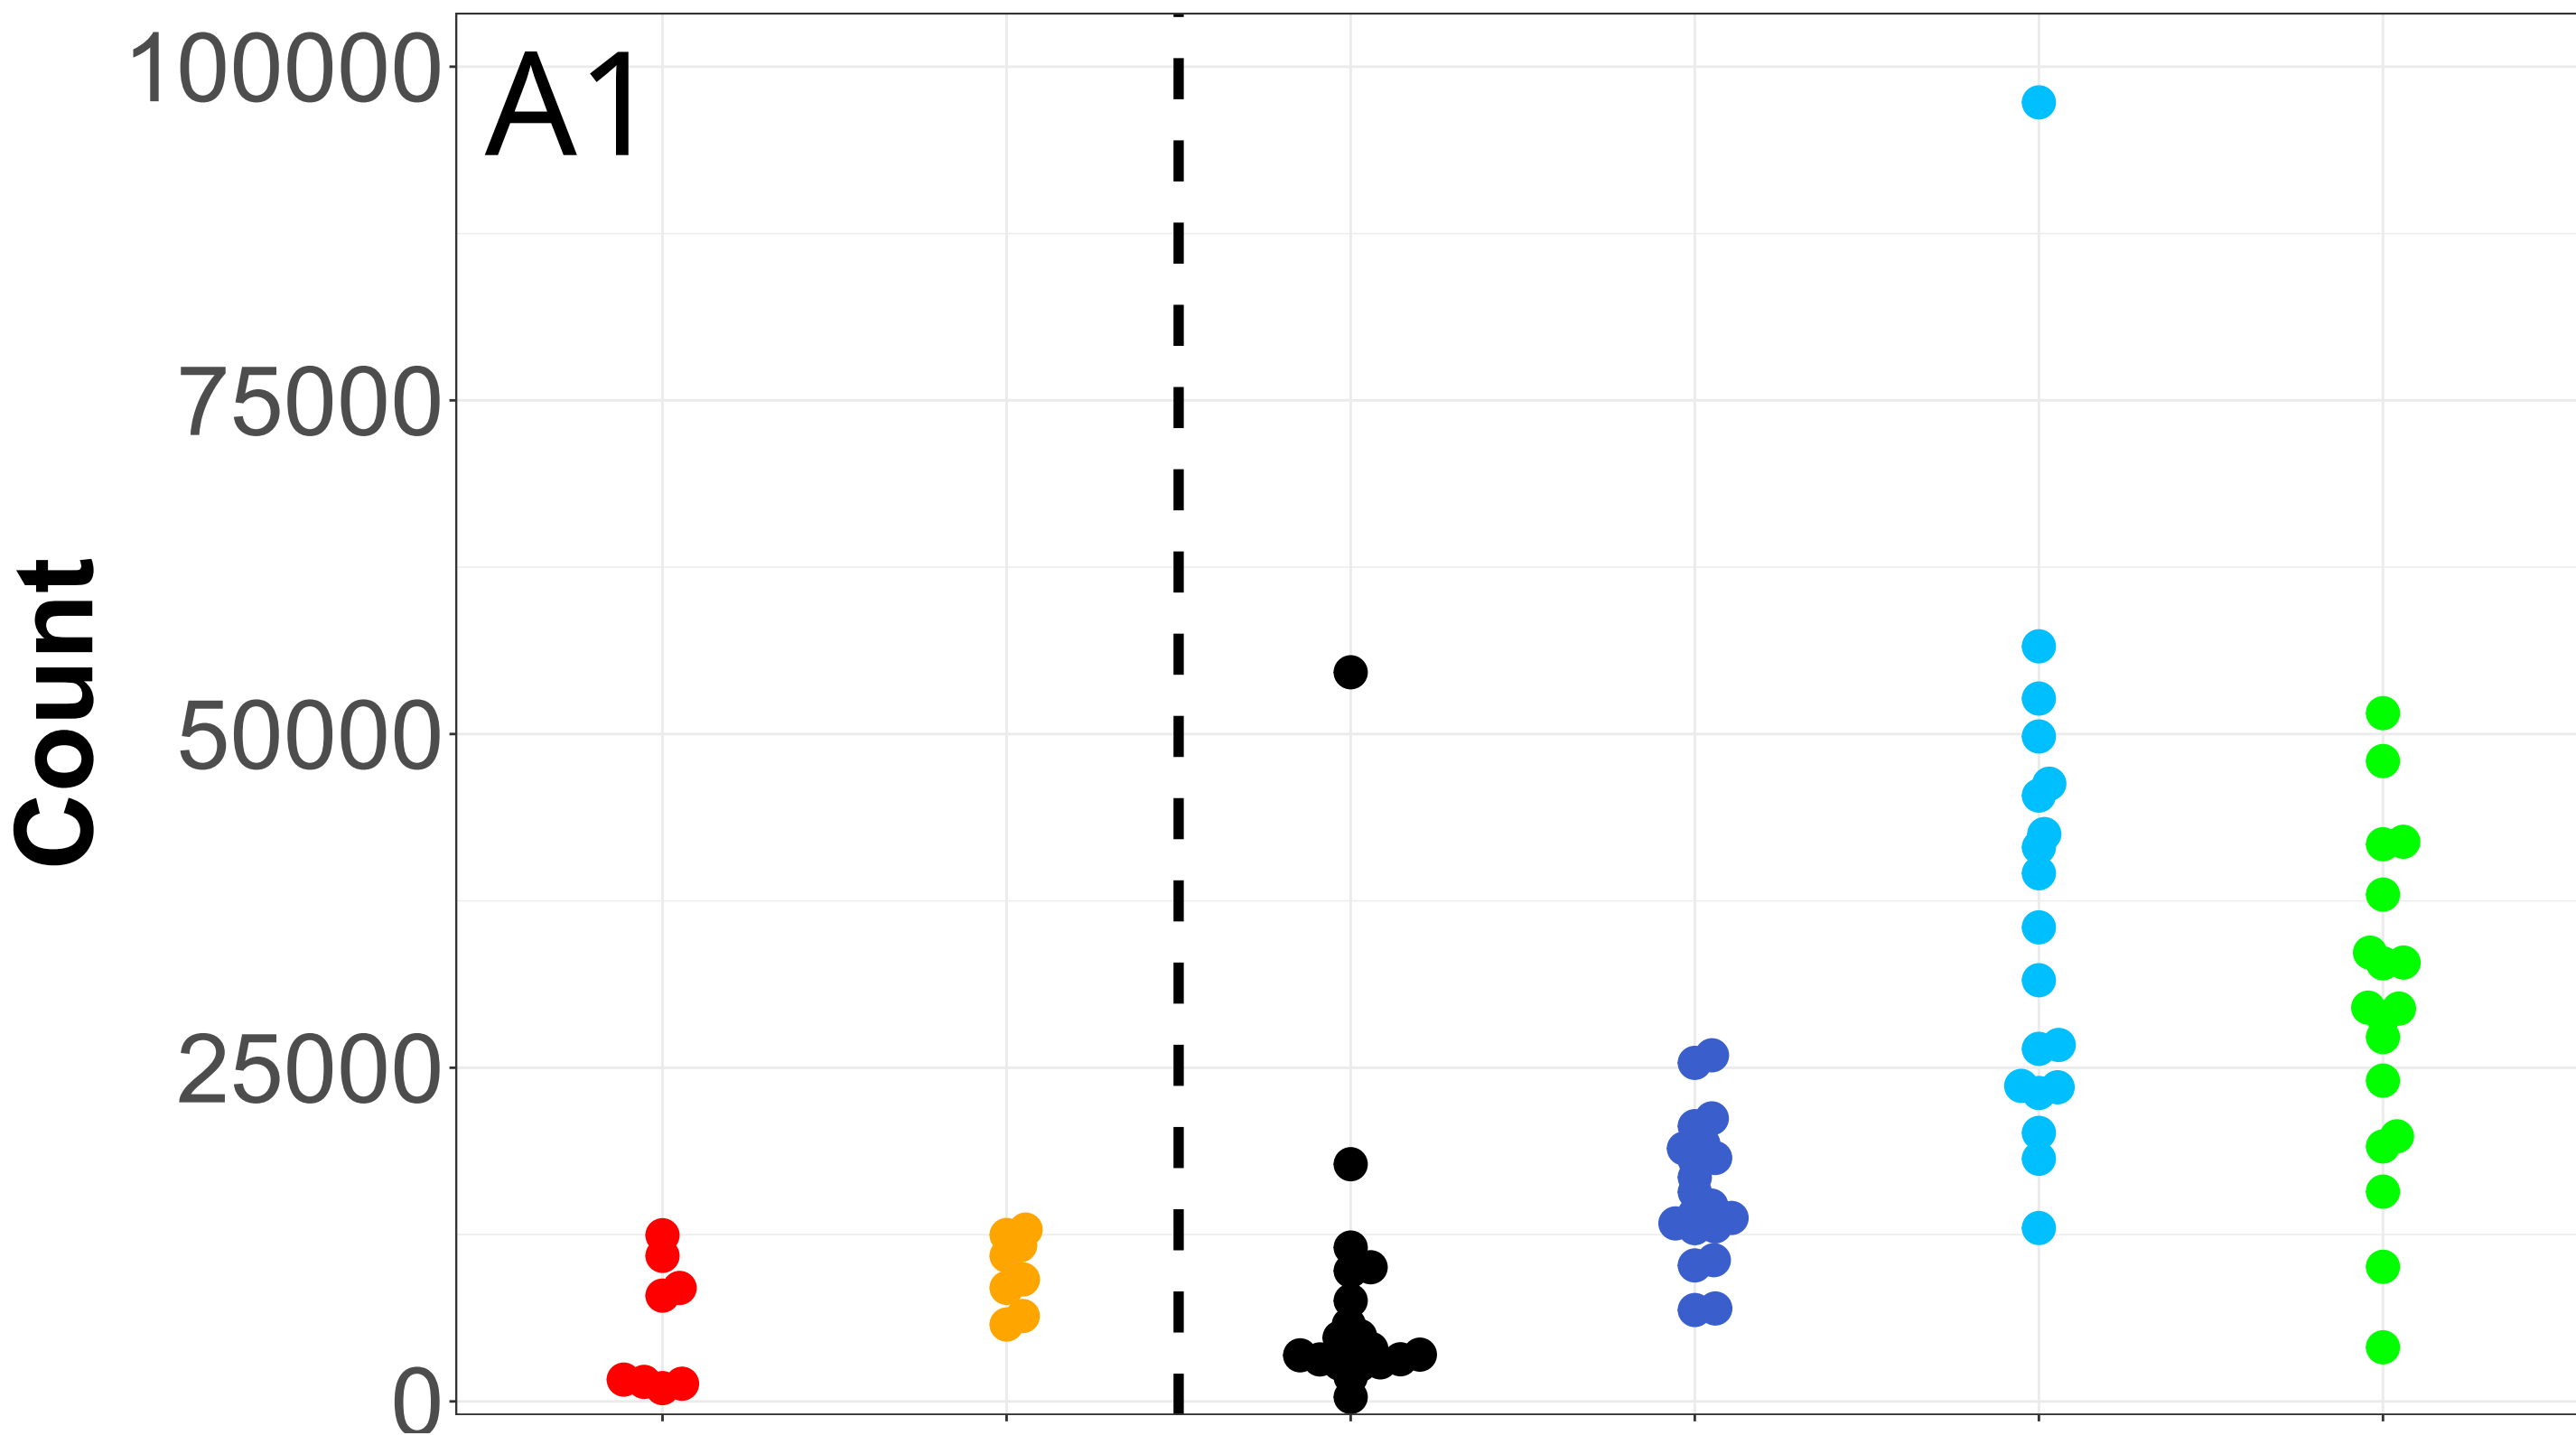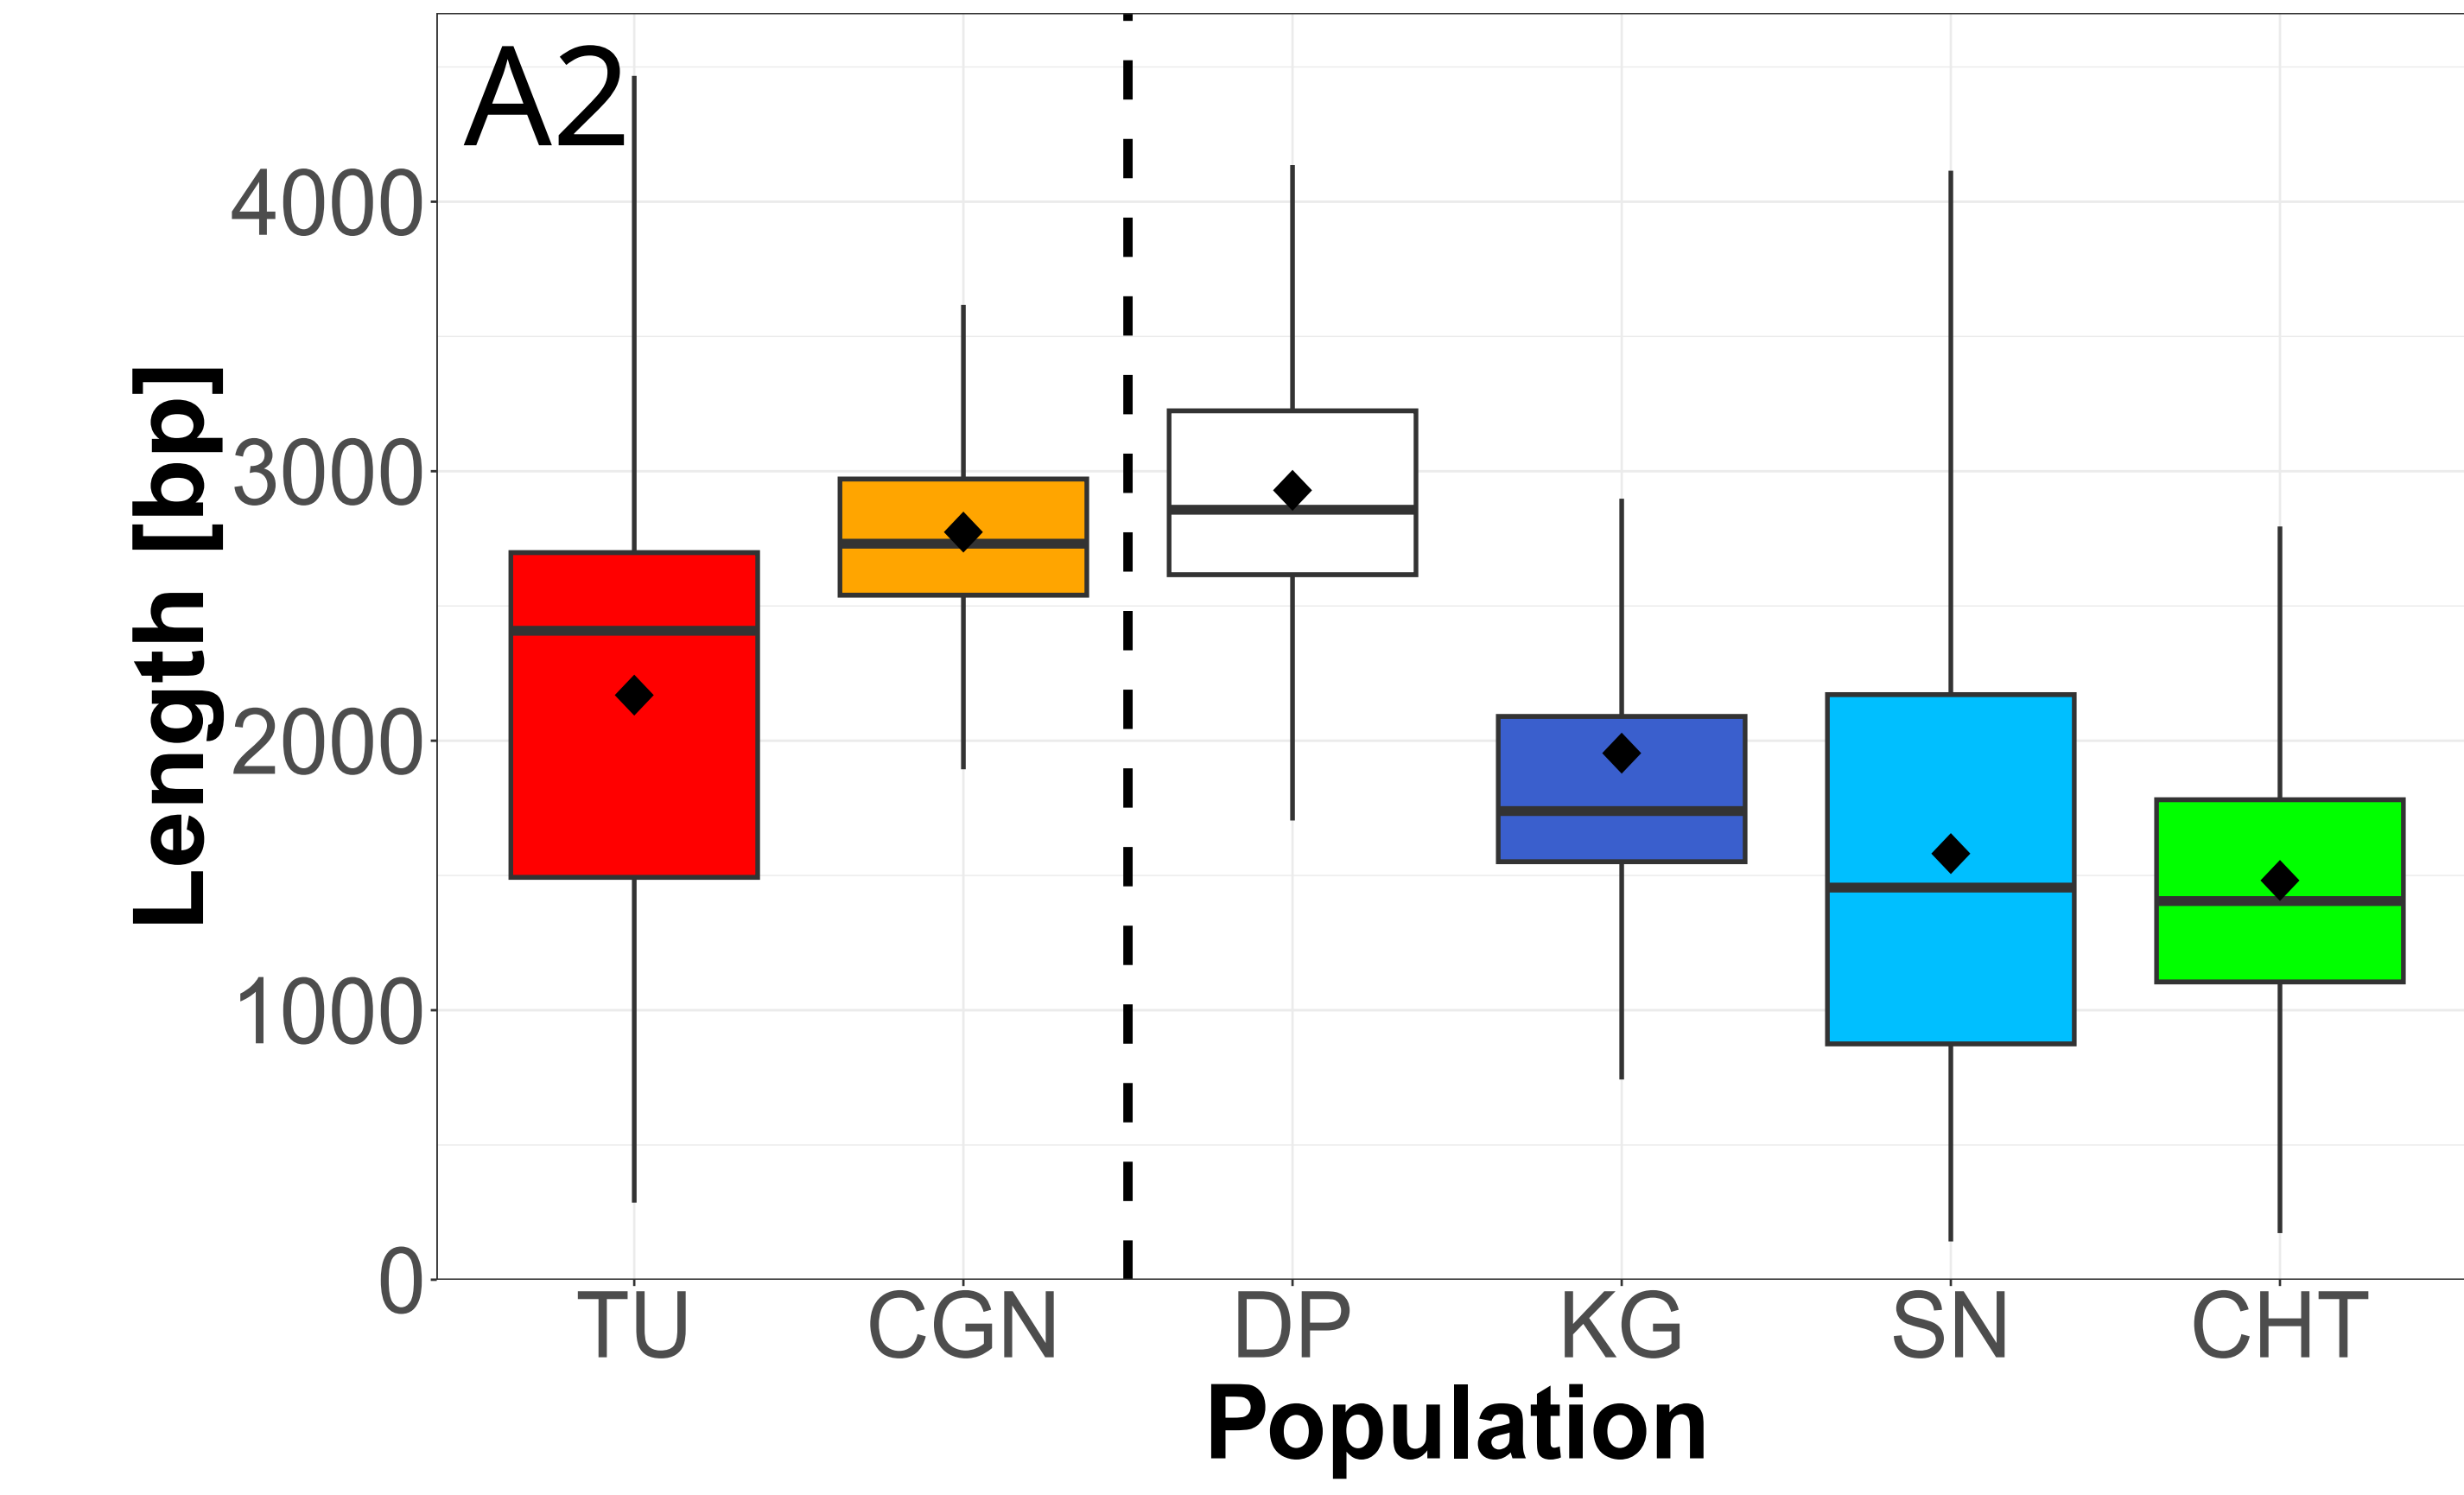

# Contigs of interest

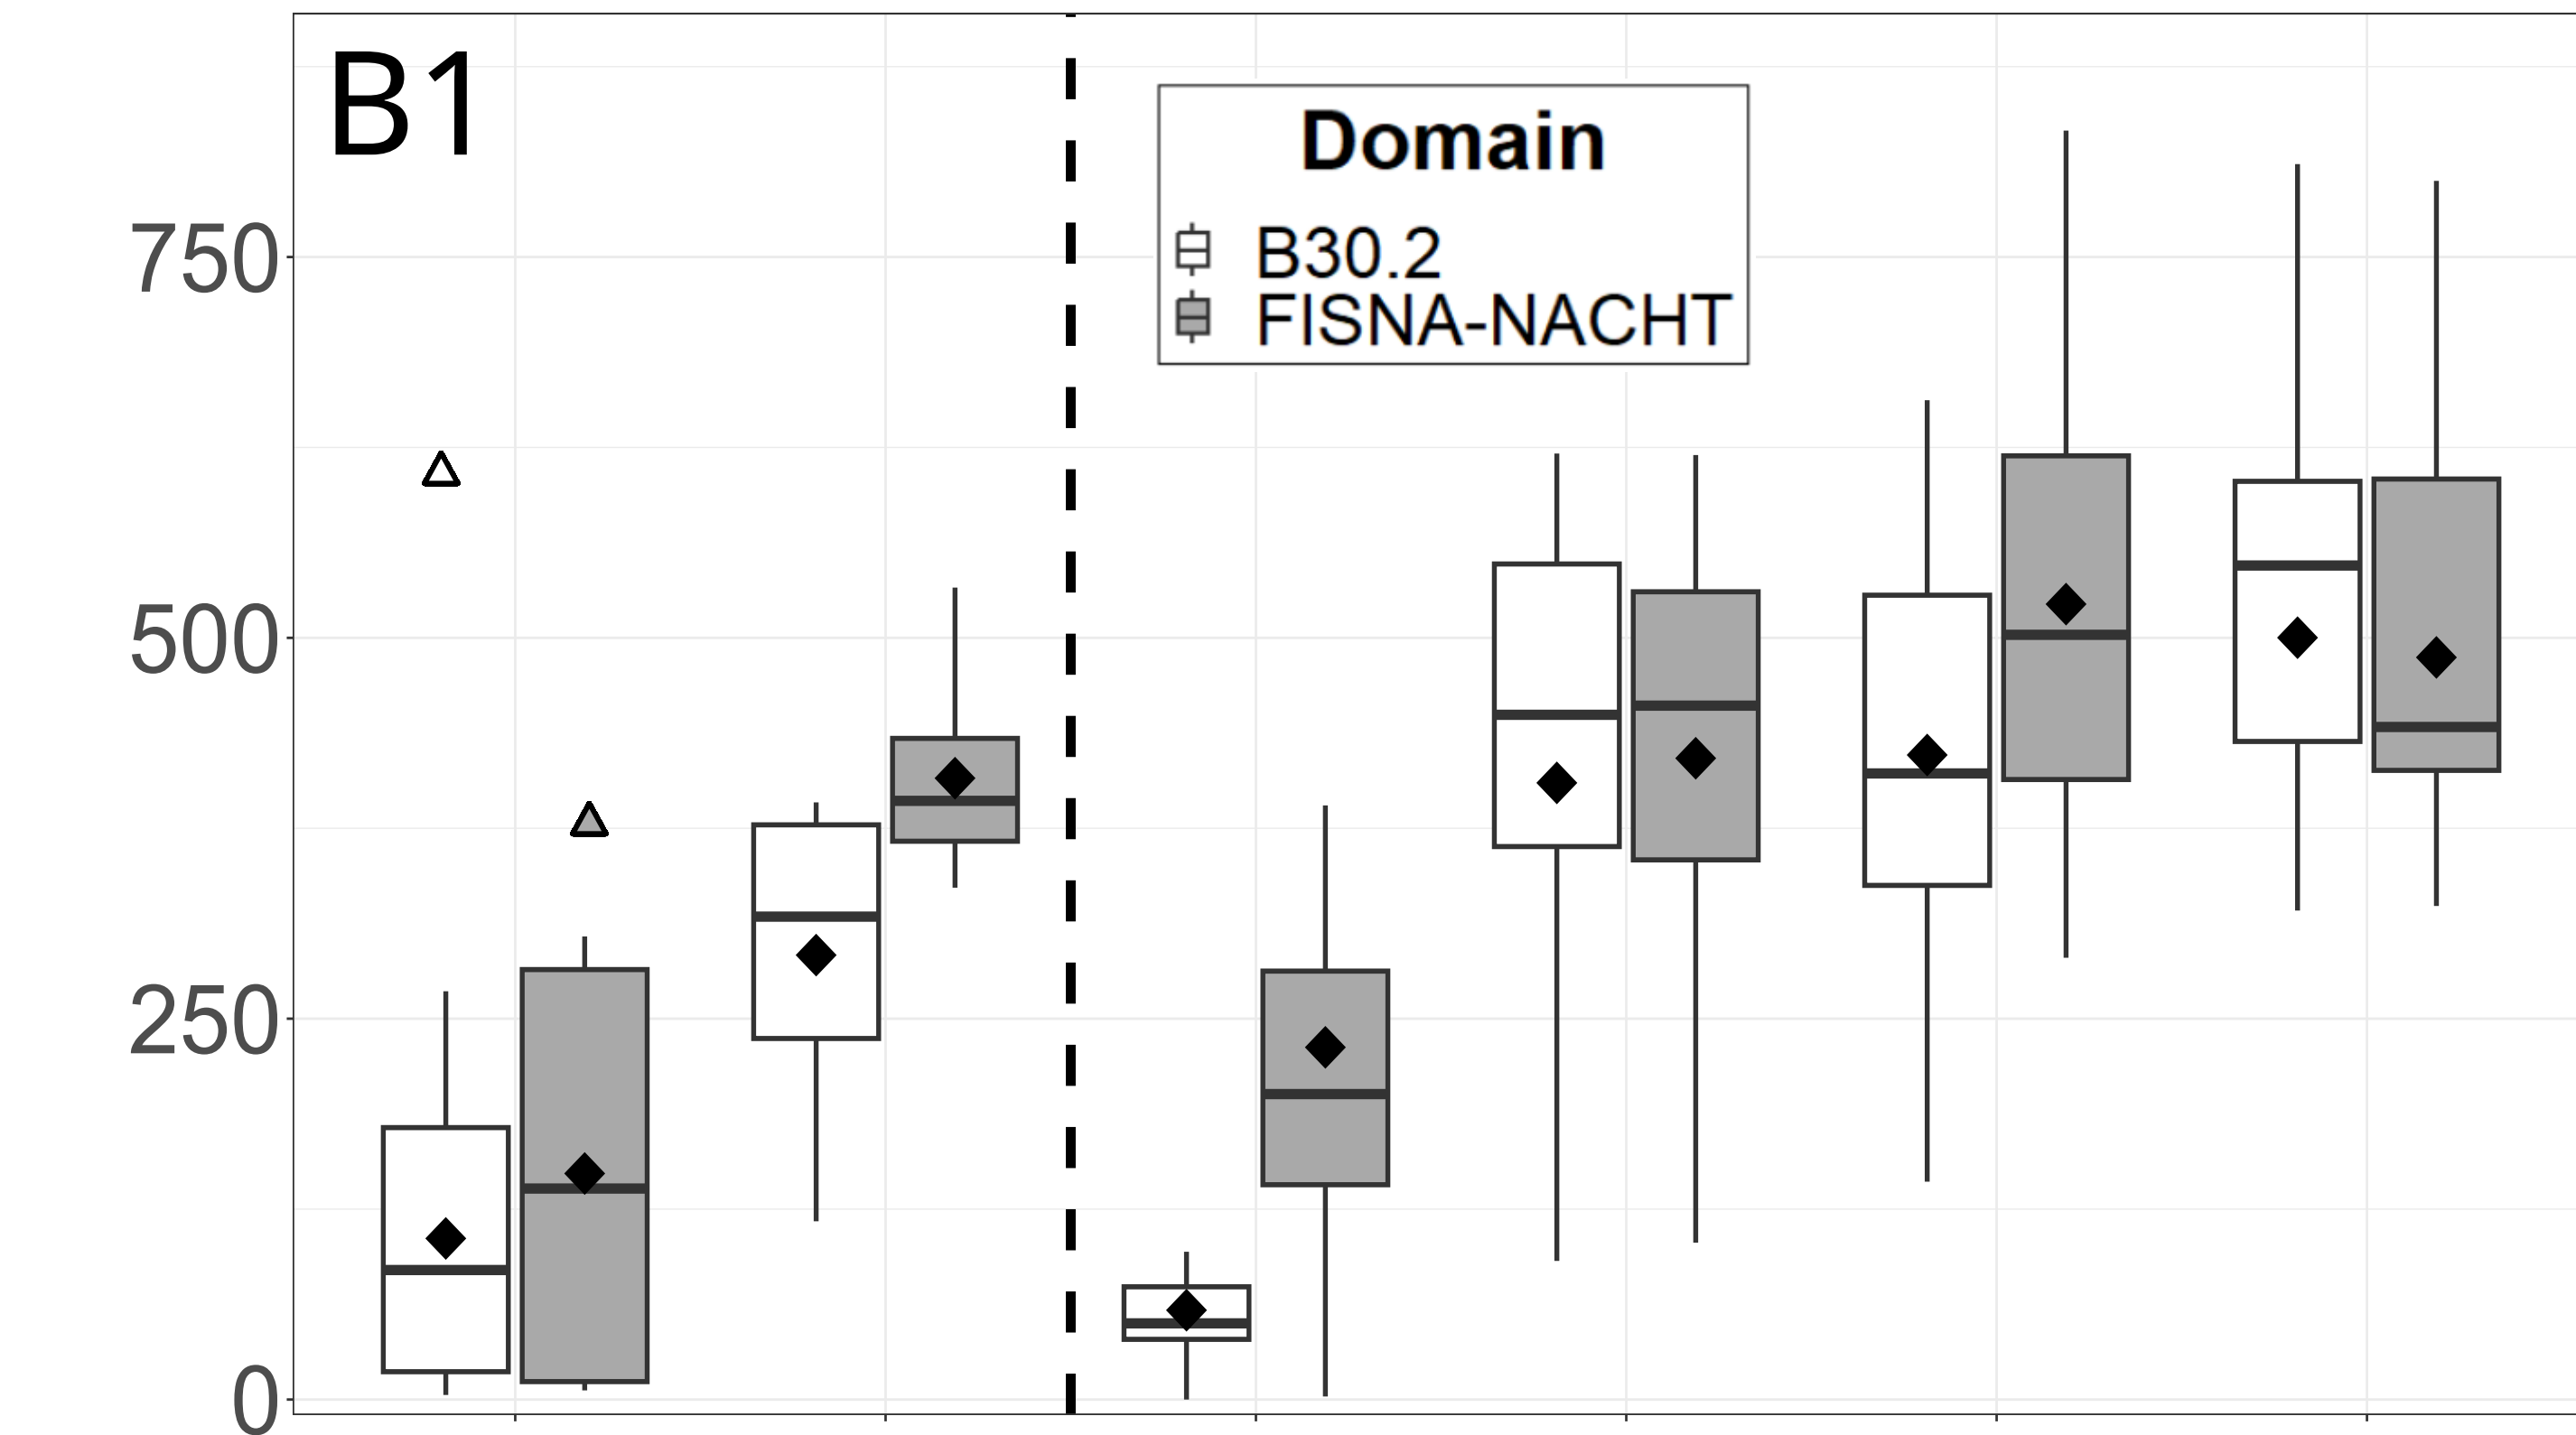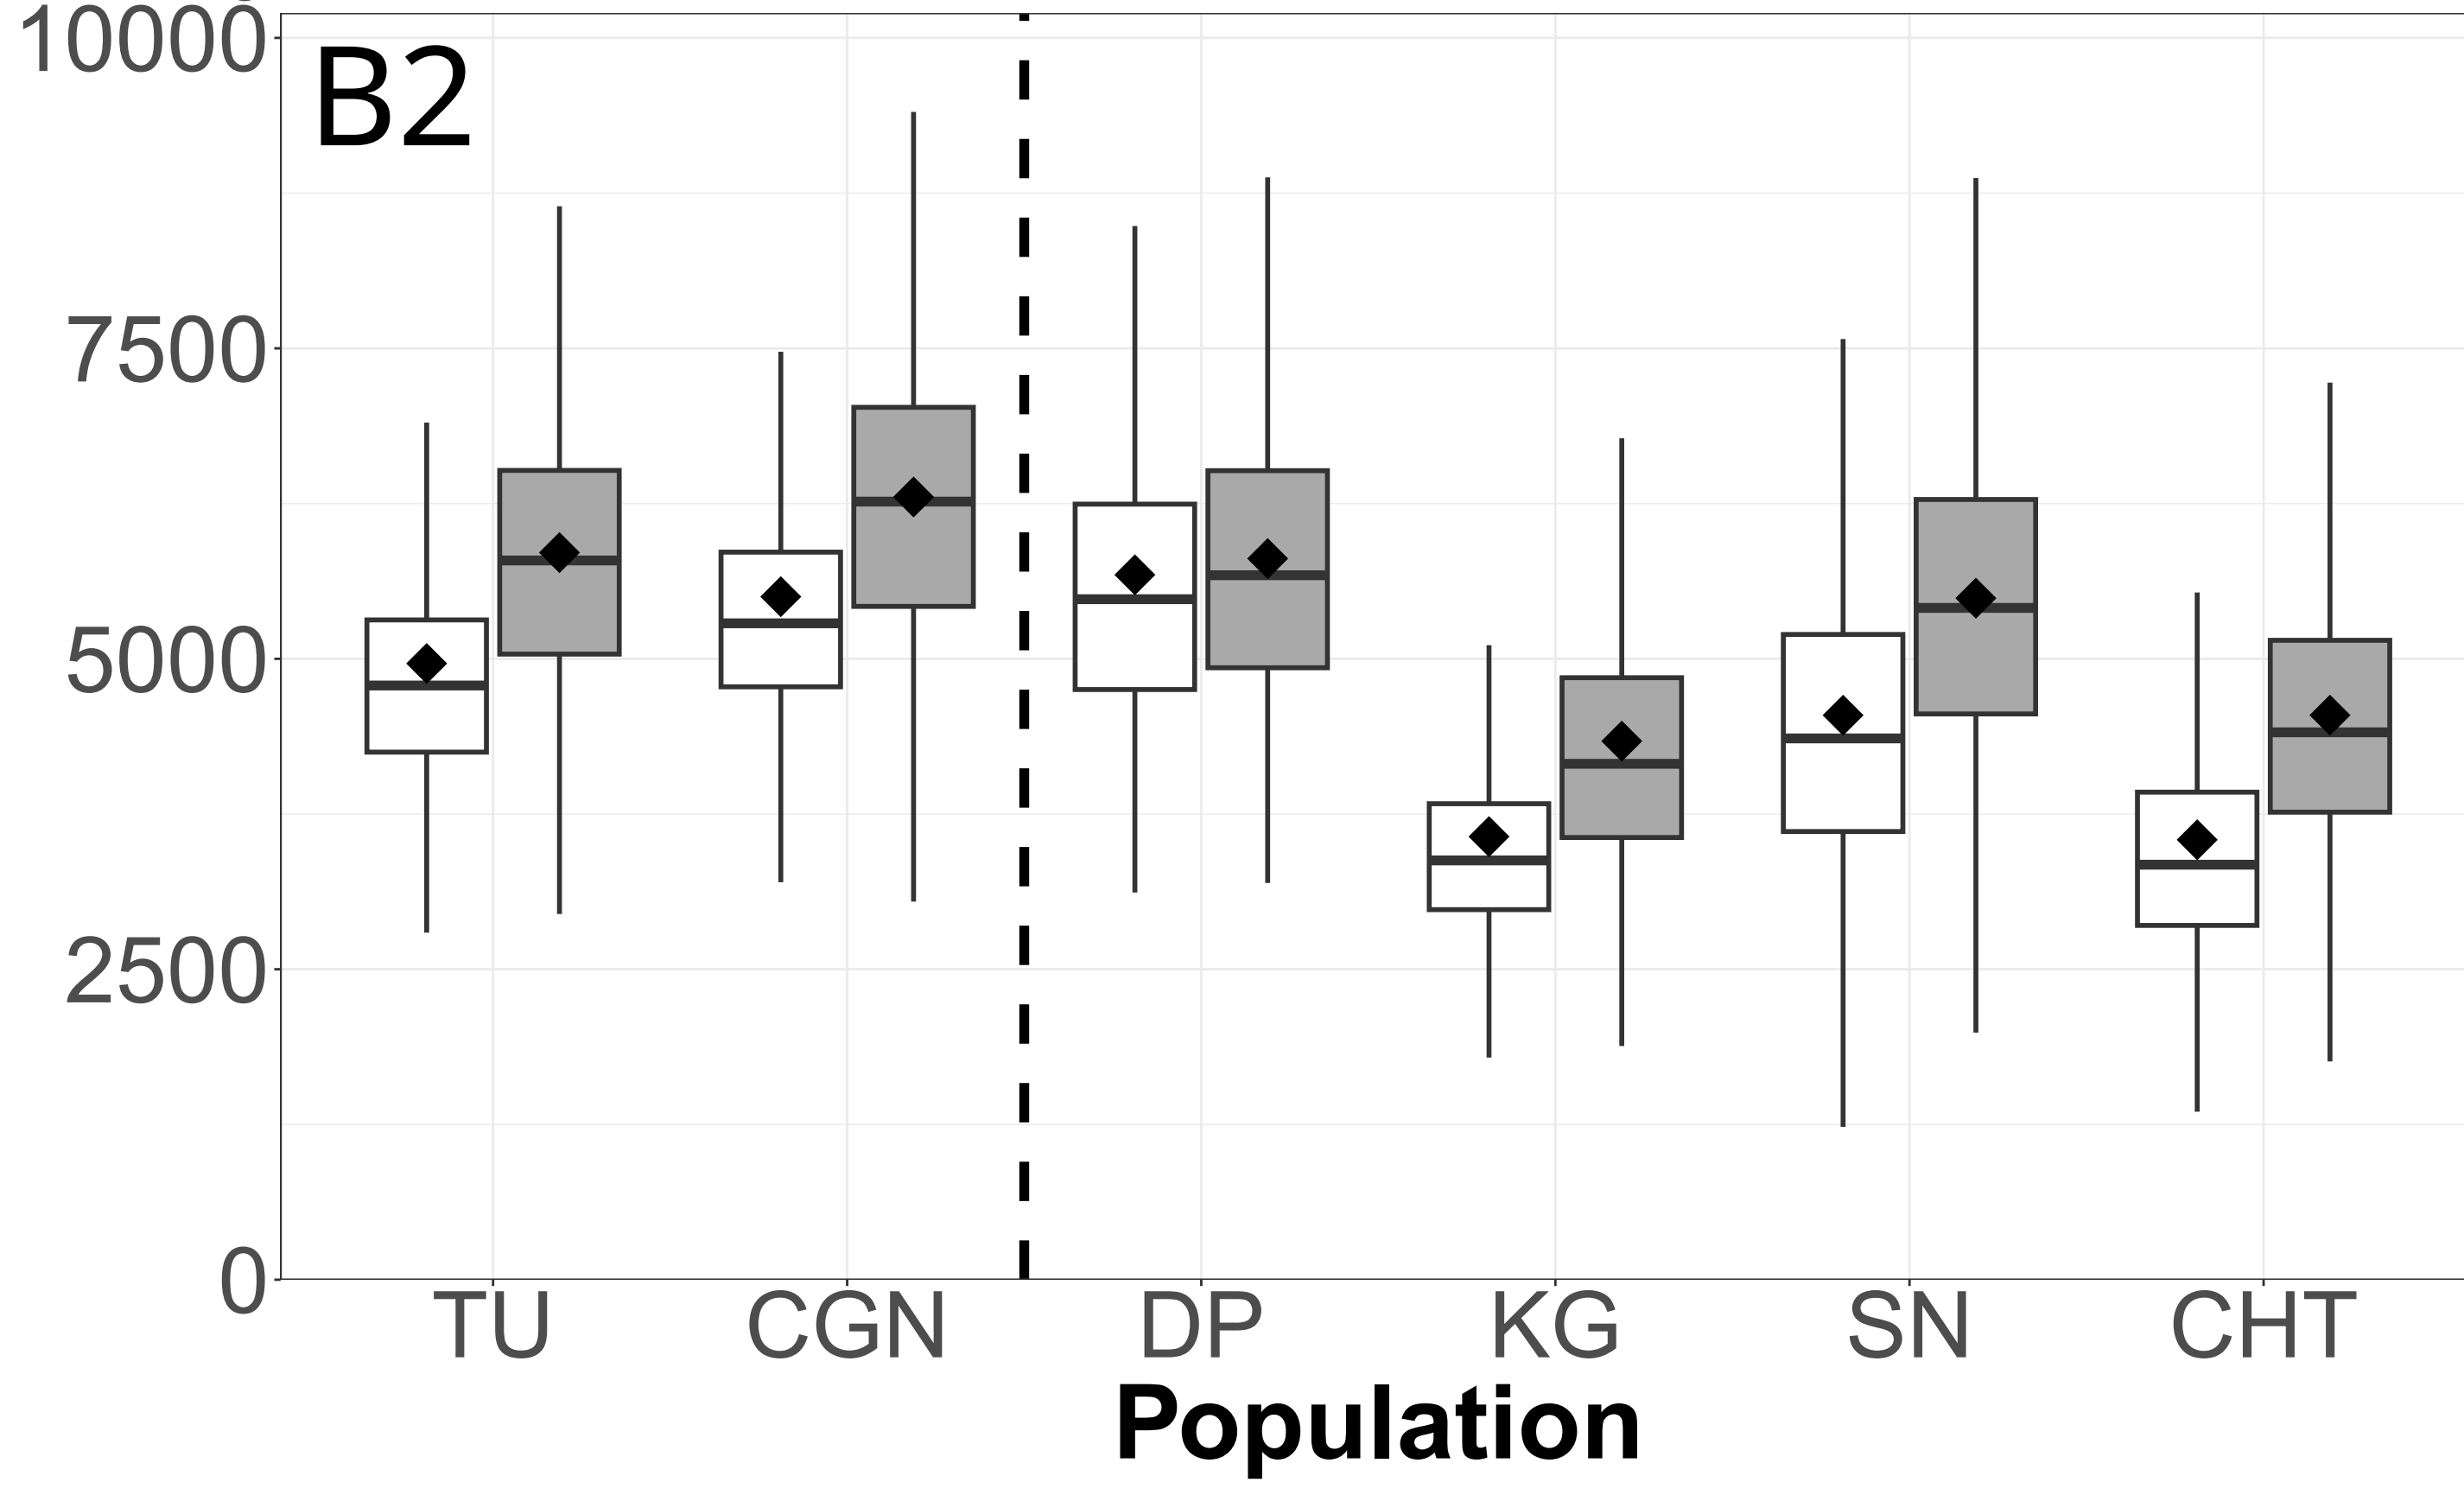

Supplement: supp [file elife-98058-supp-v1.zip]

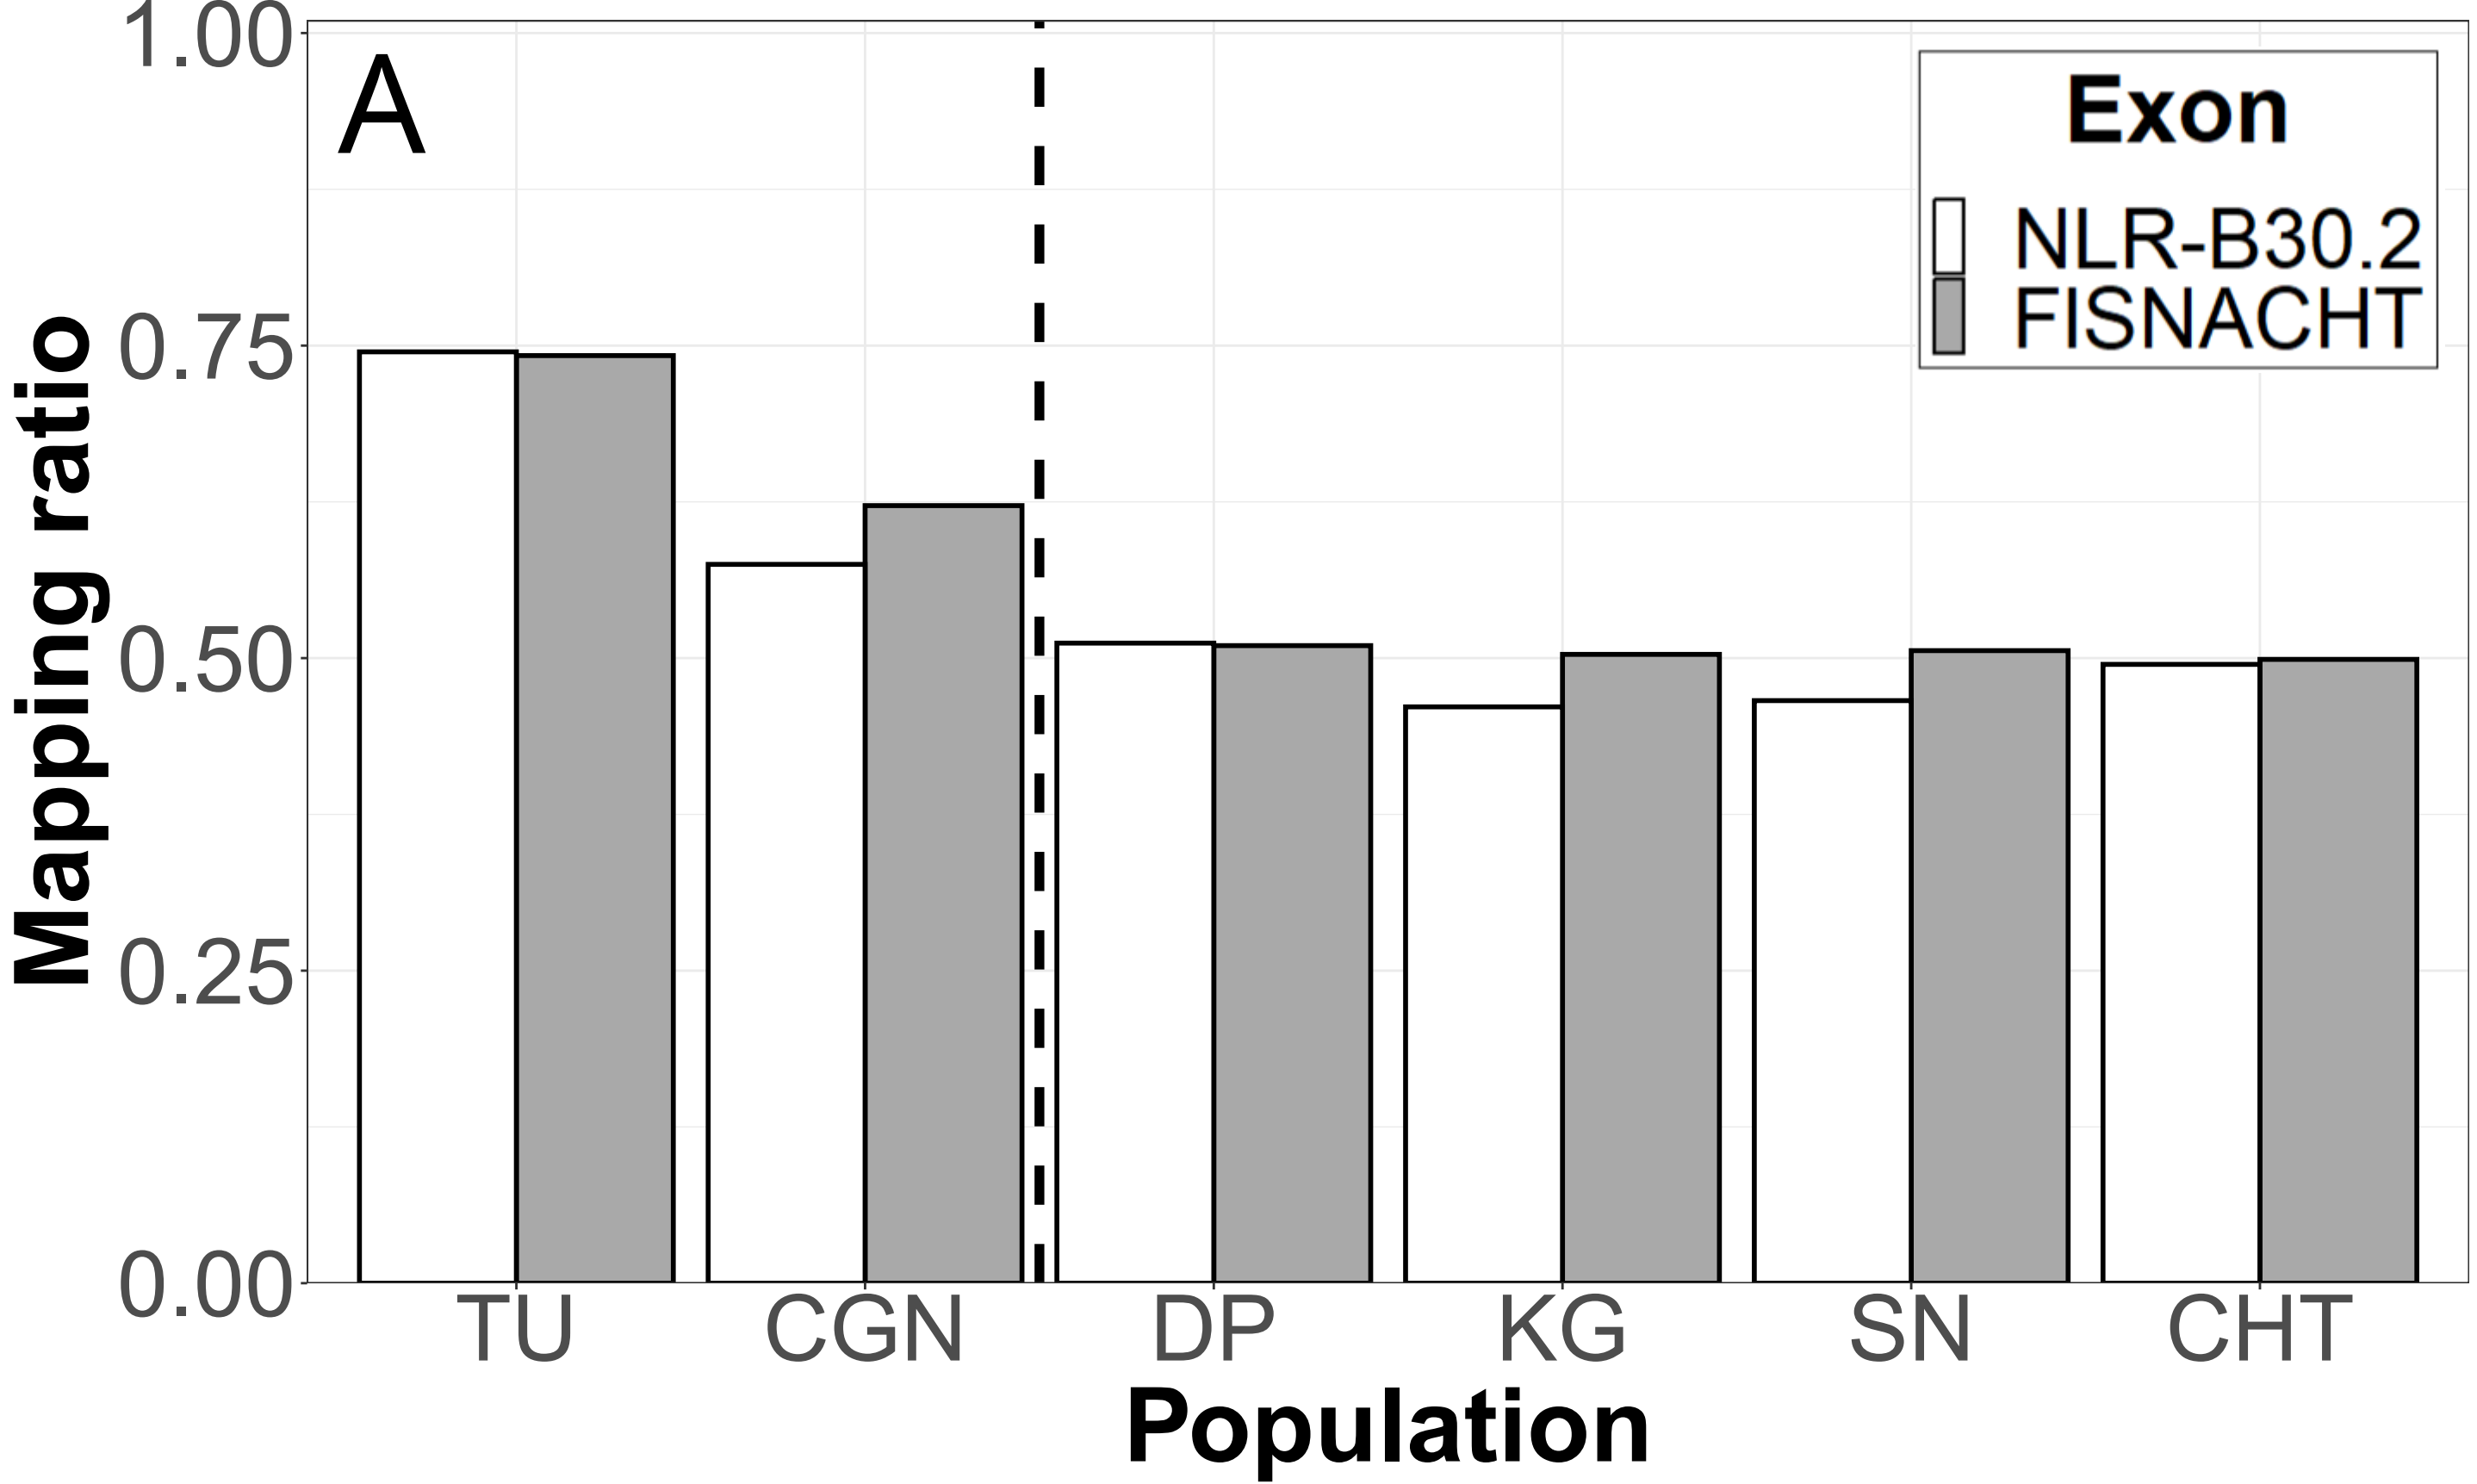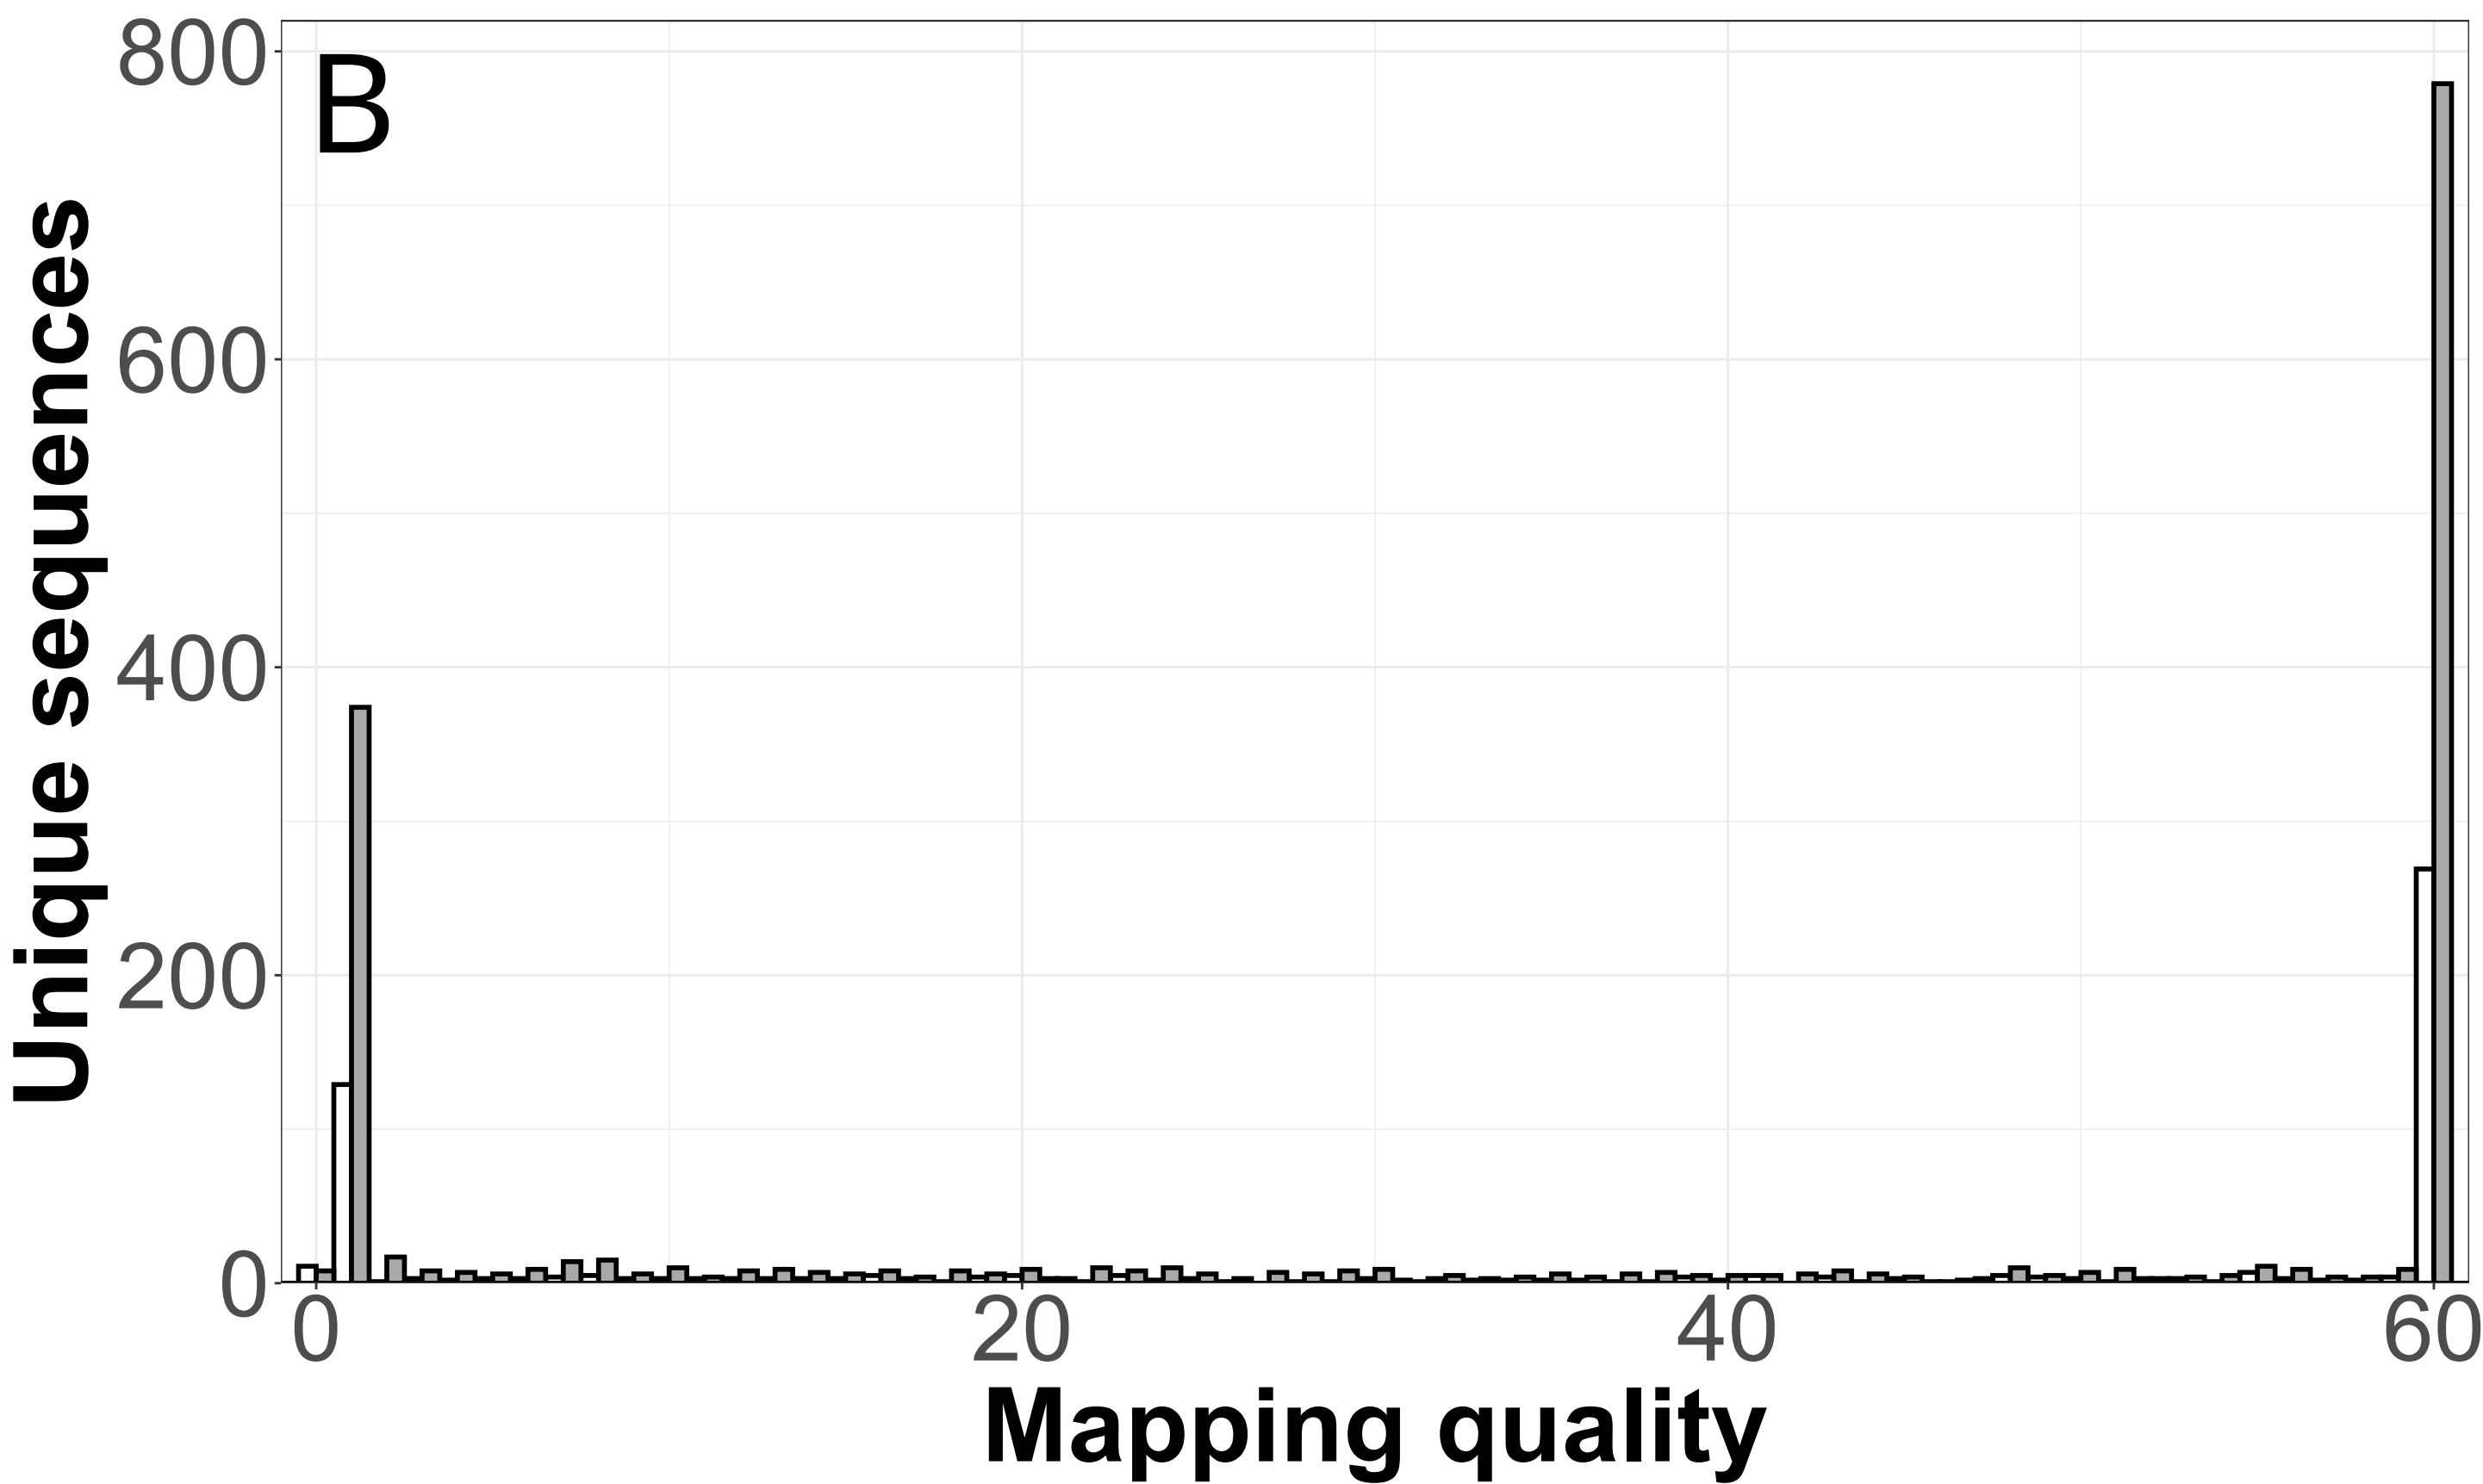

Supplement: supp [file elife-98058-supp-v1.zip]

# FISNA-NACHT

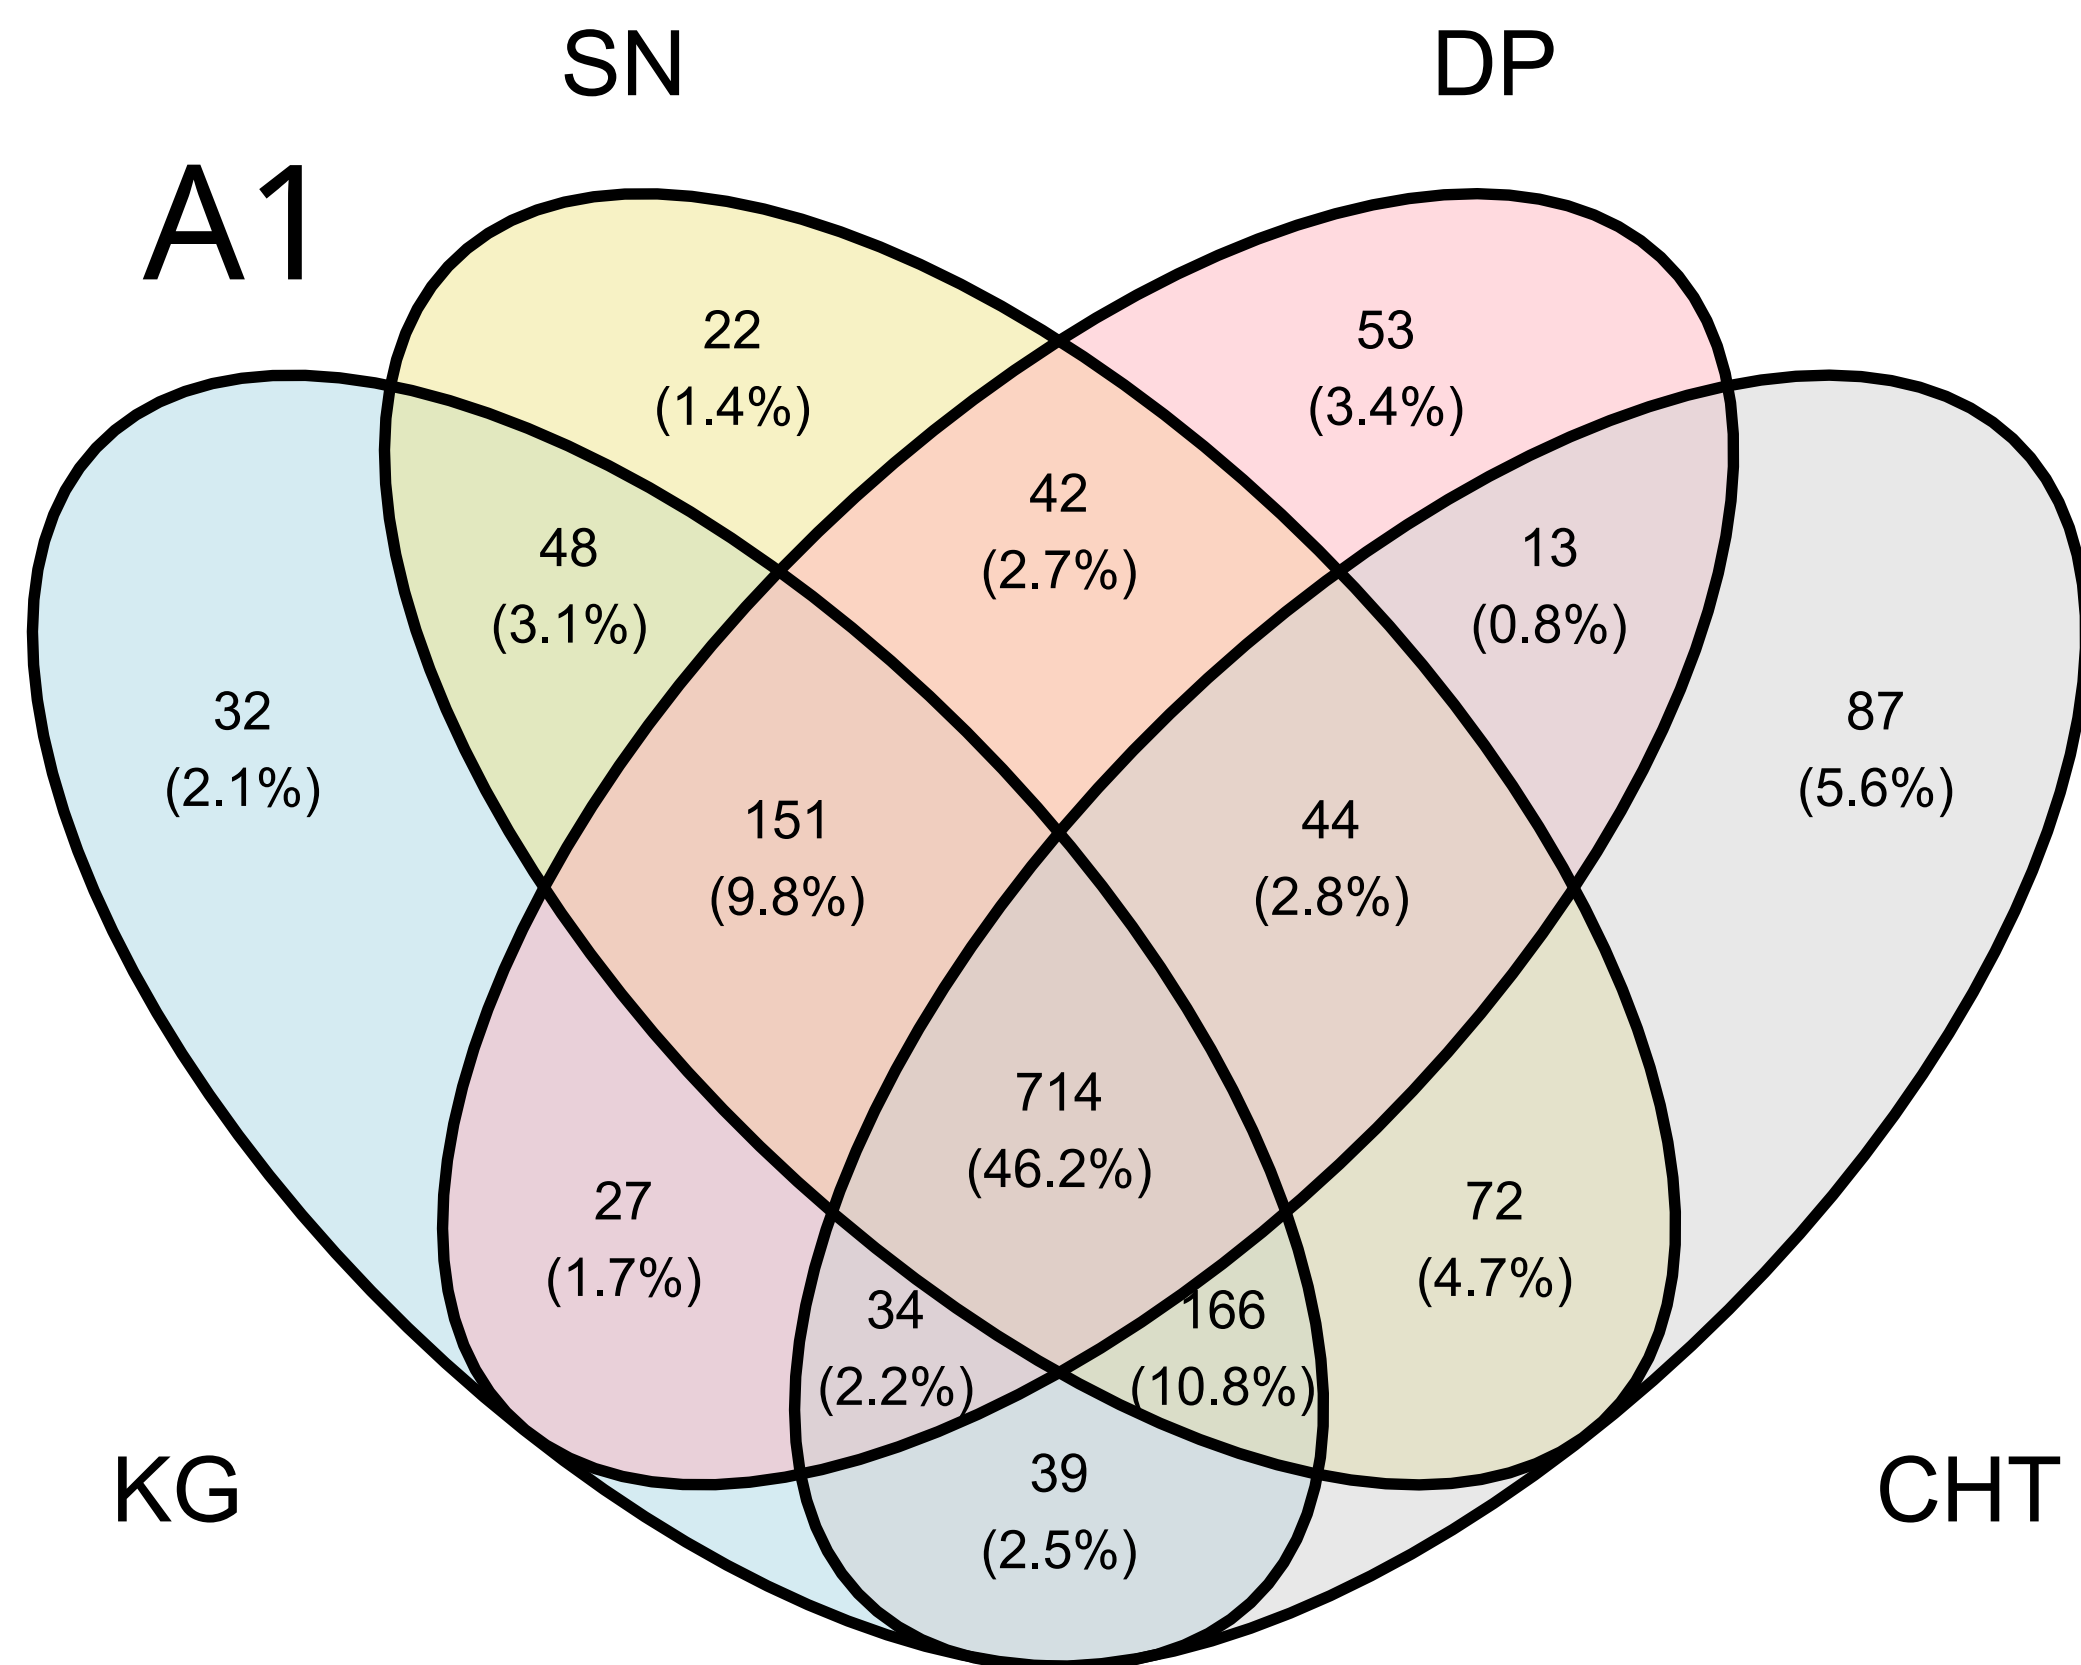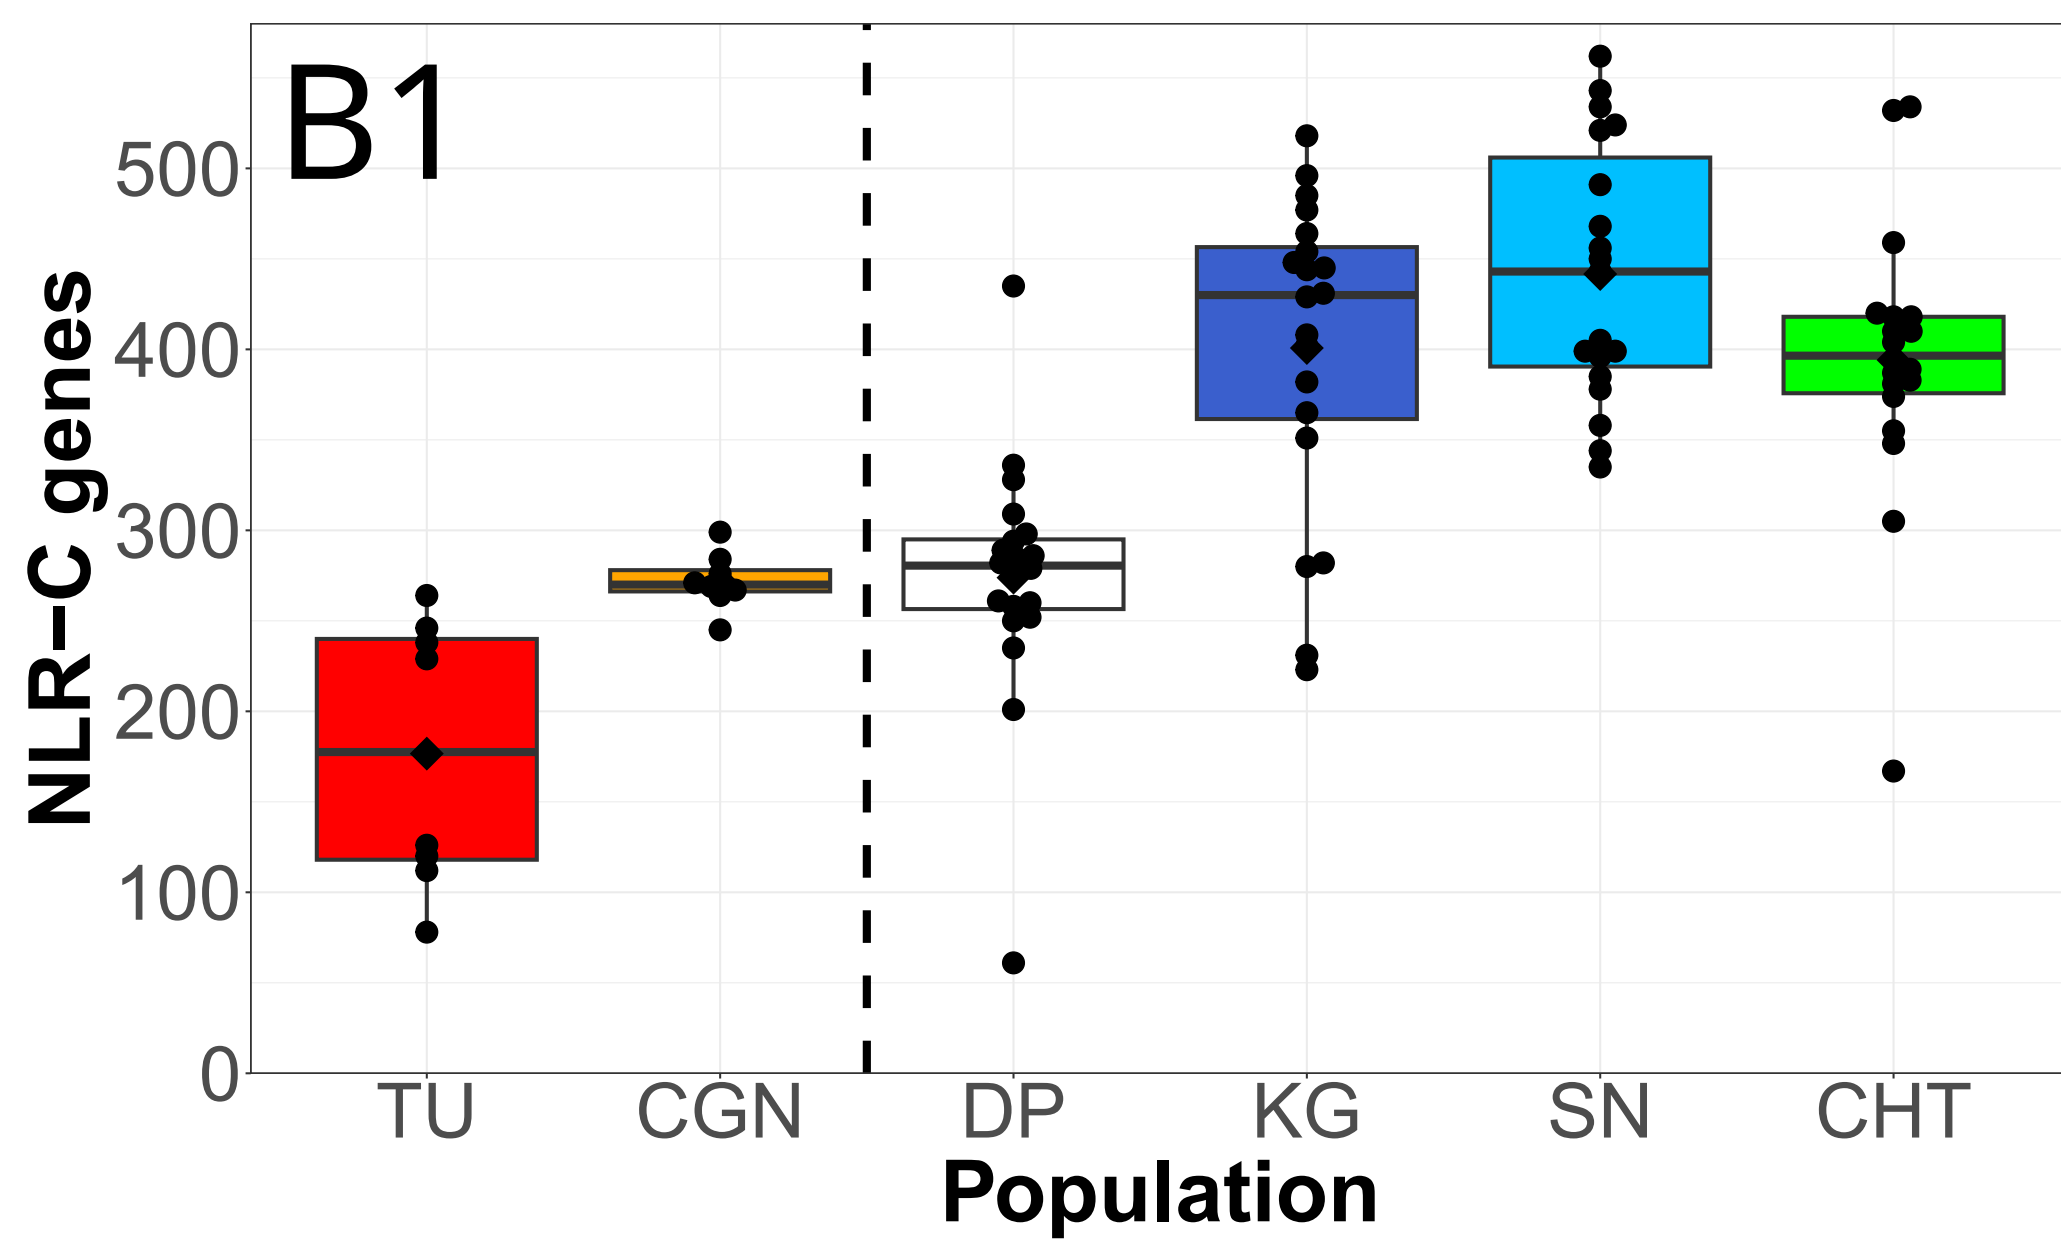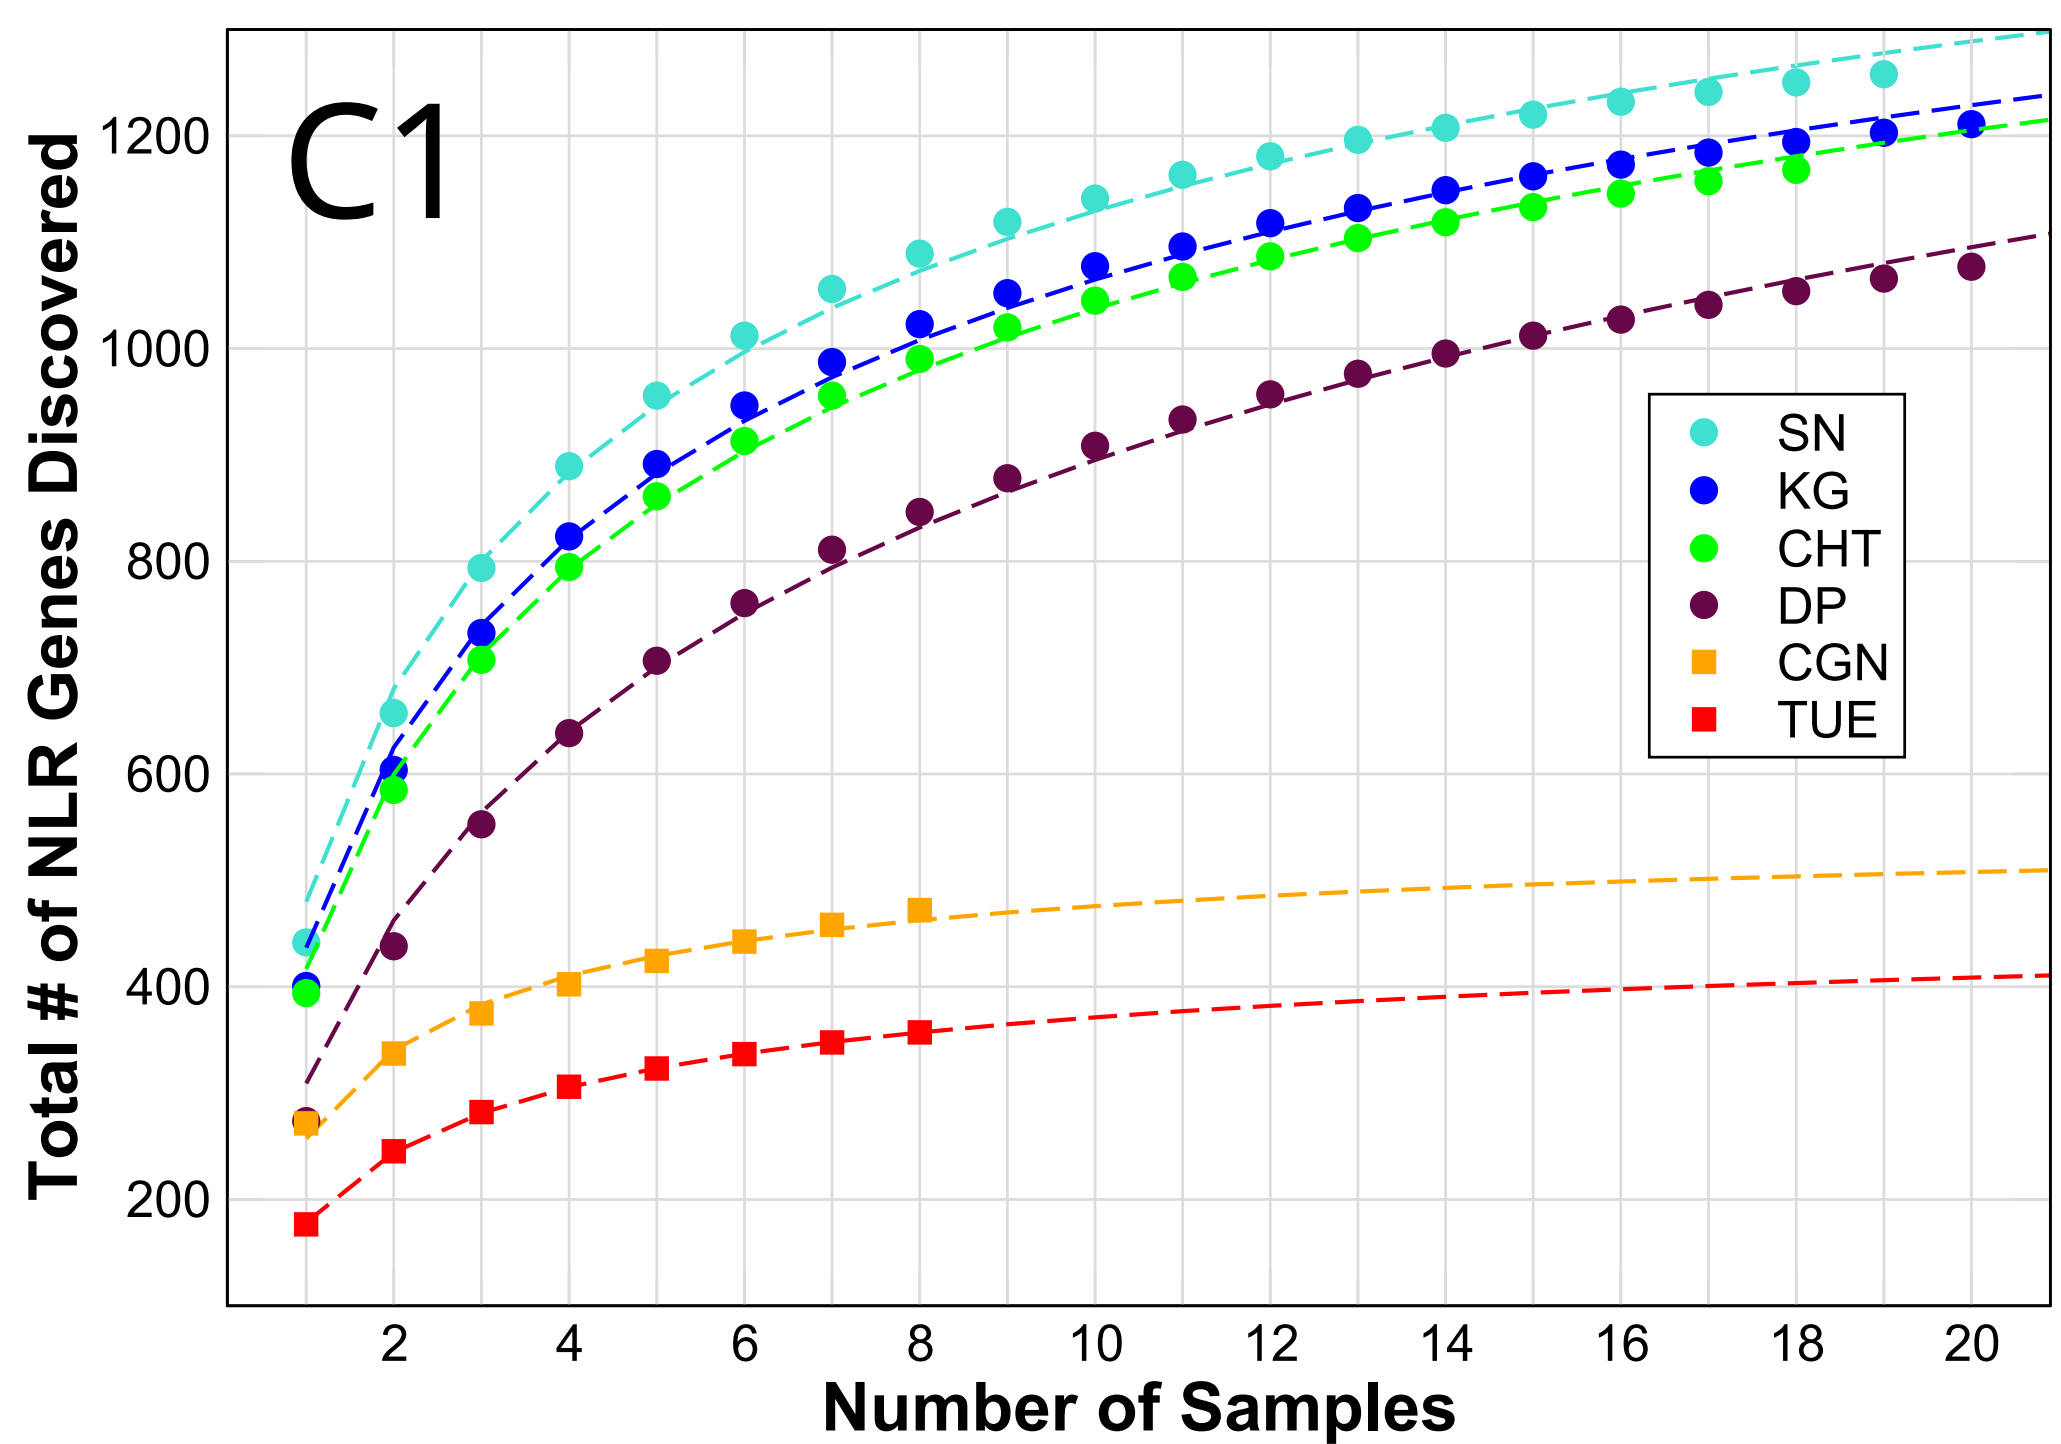

# NLR-B30.2

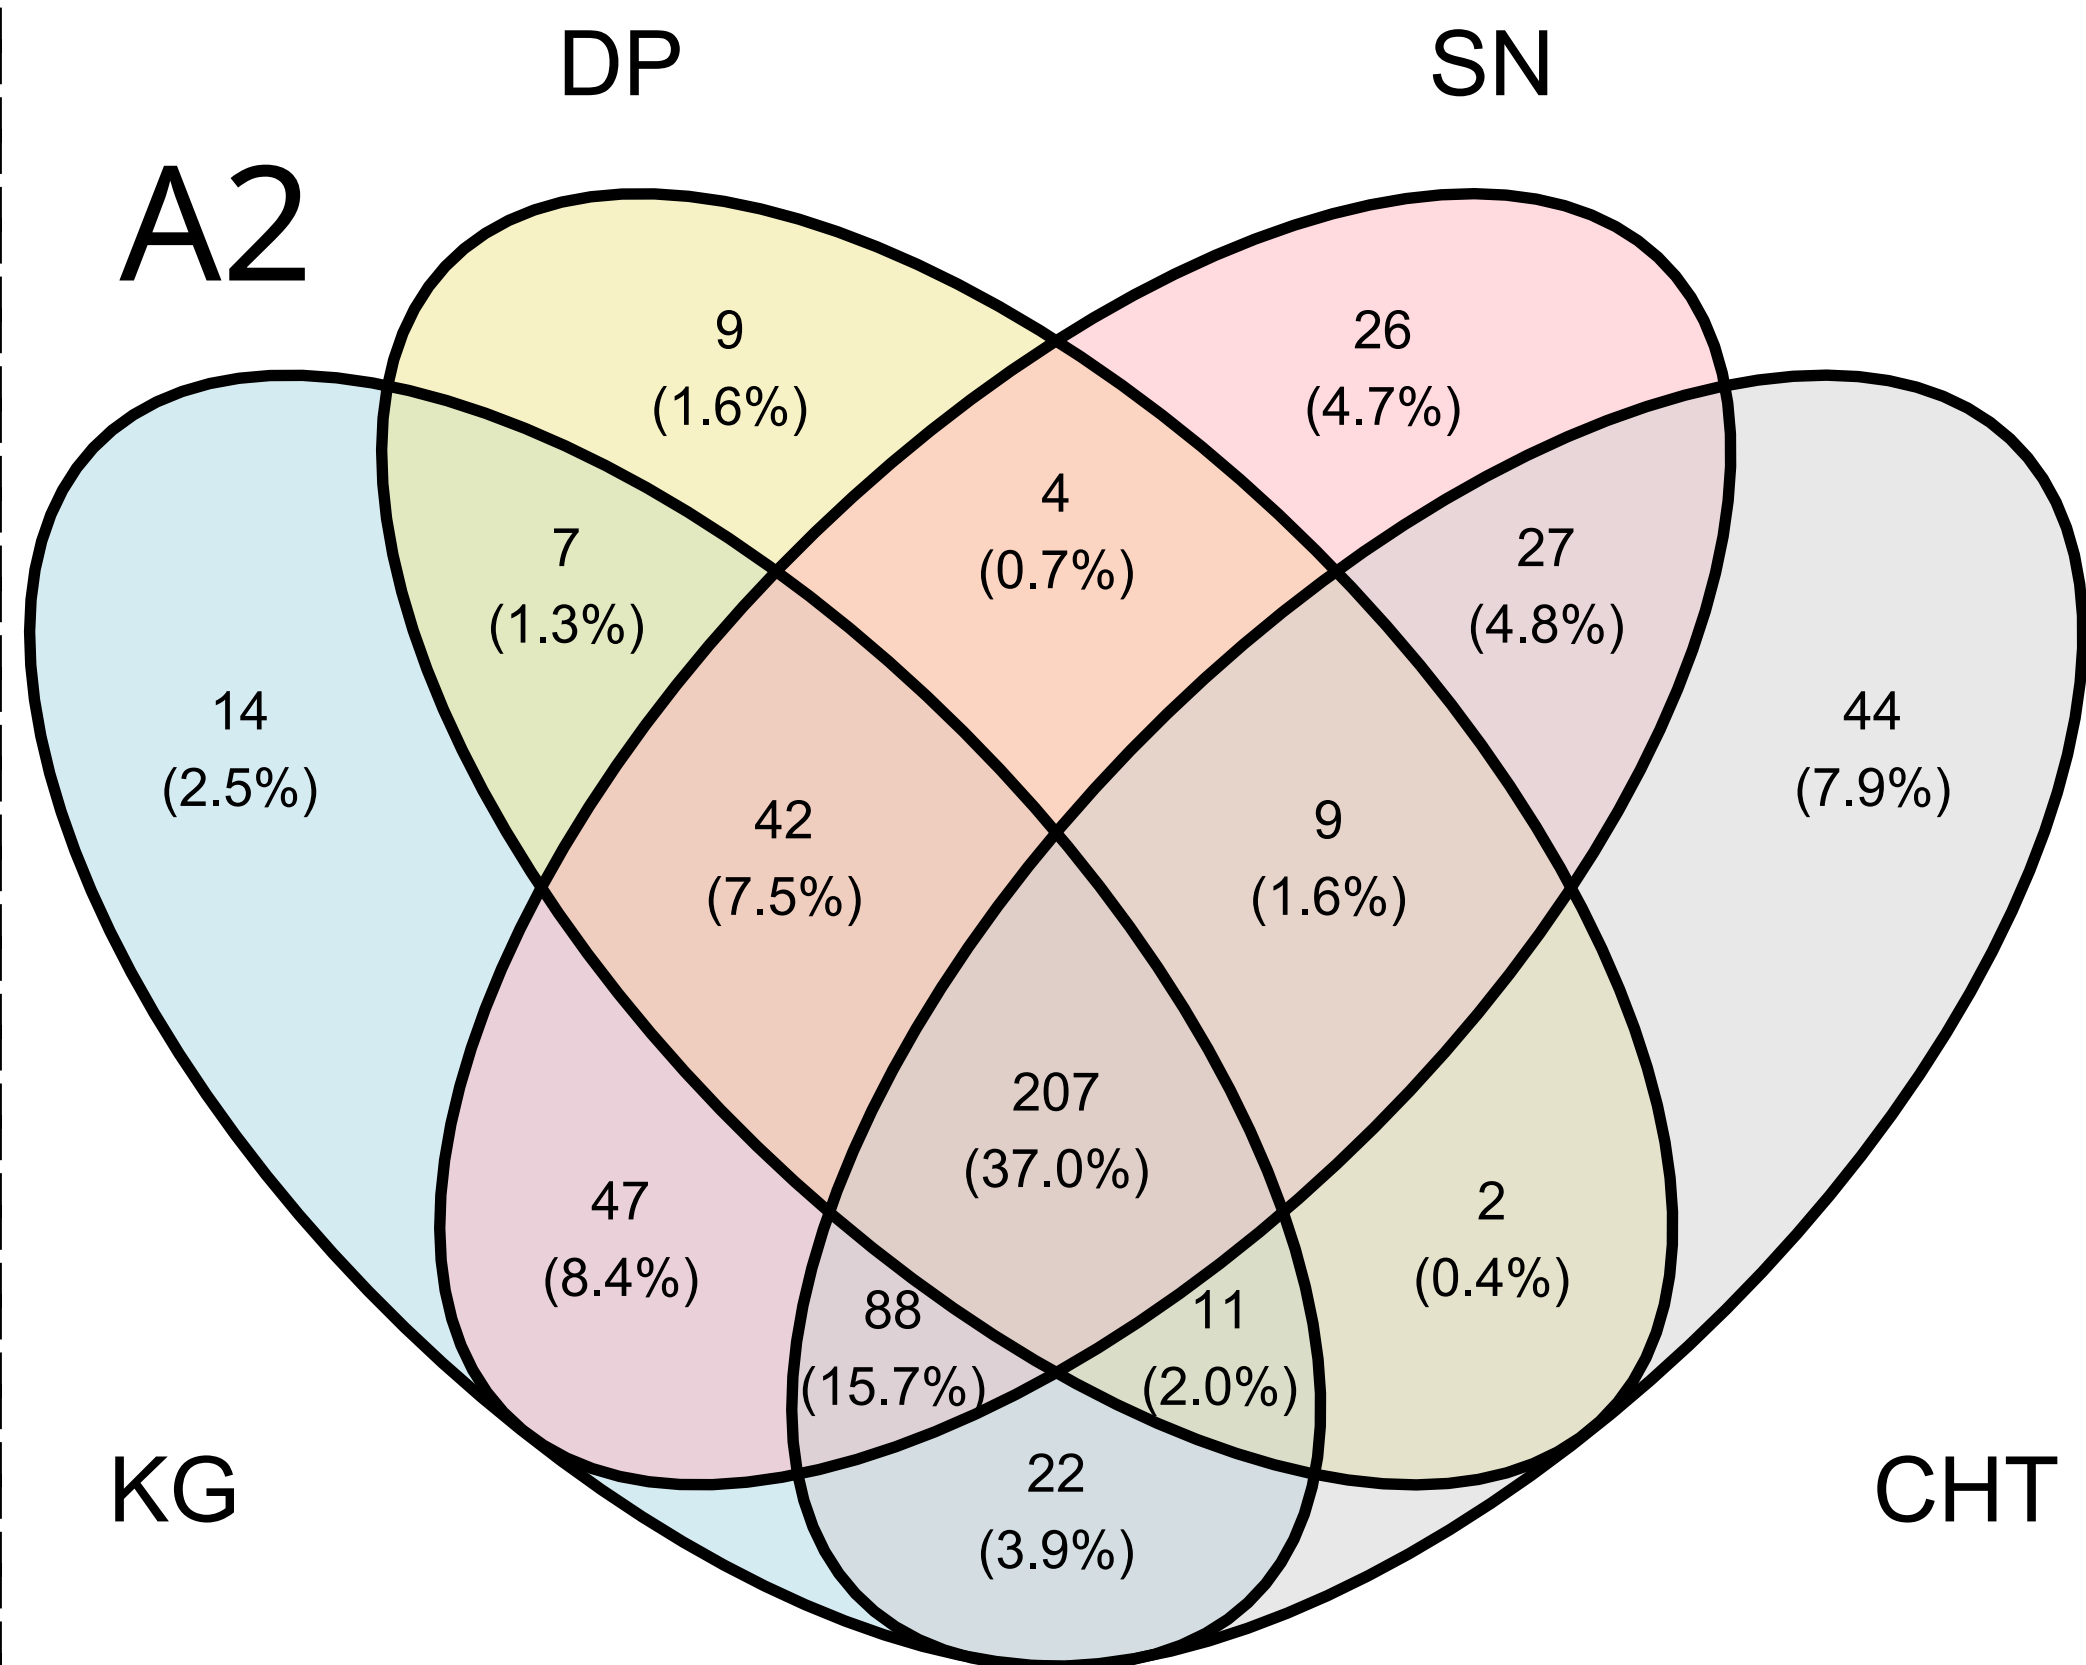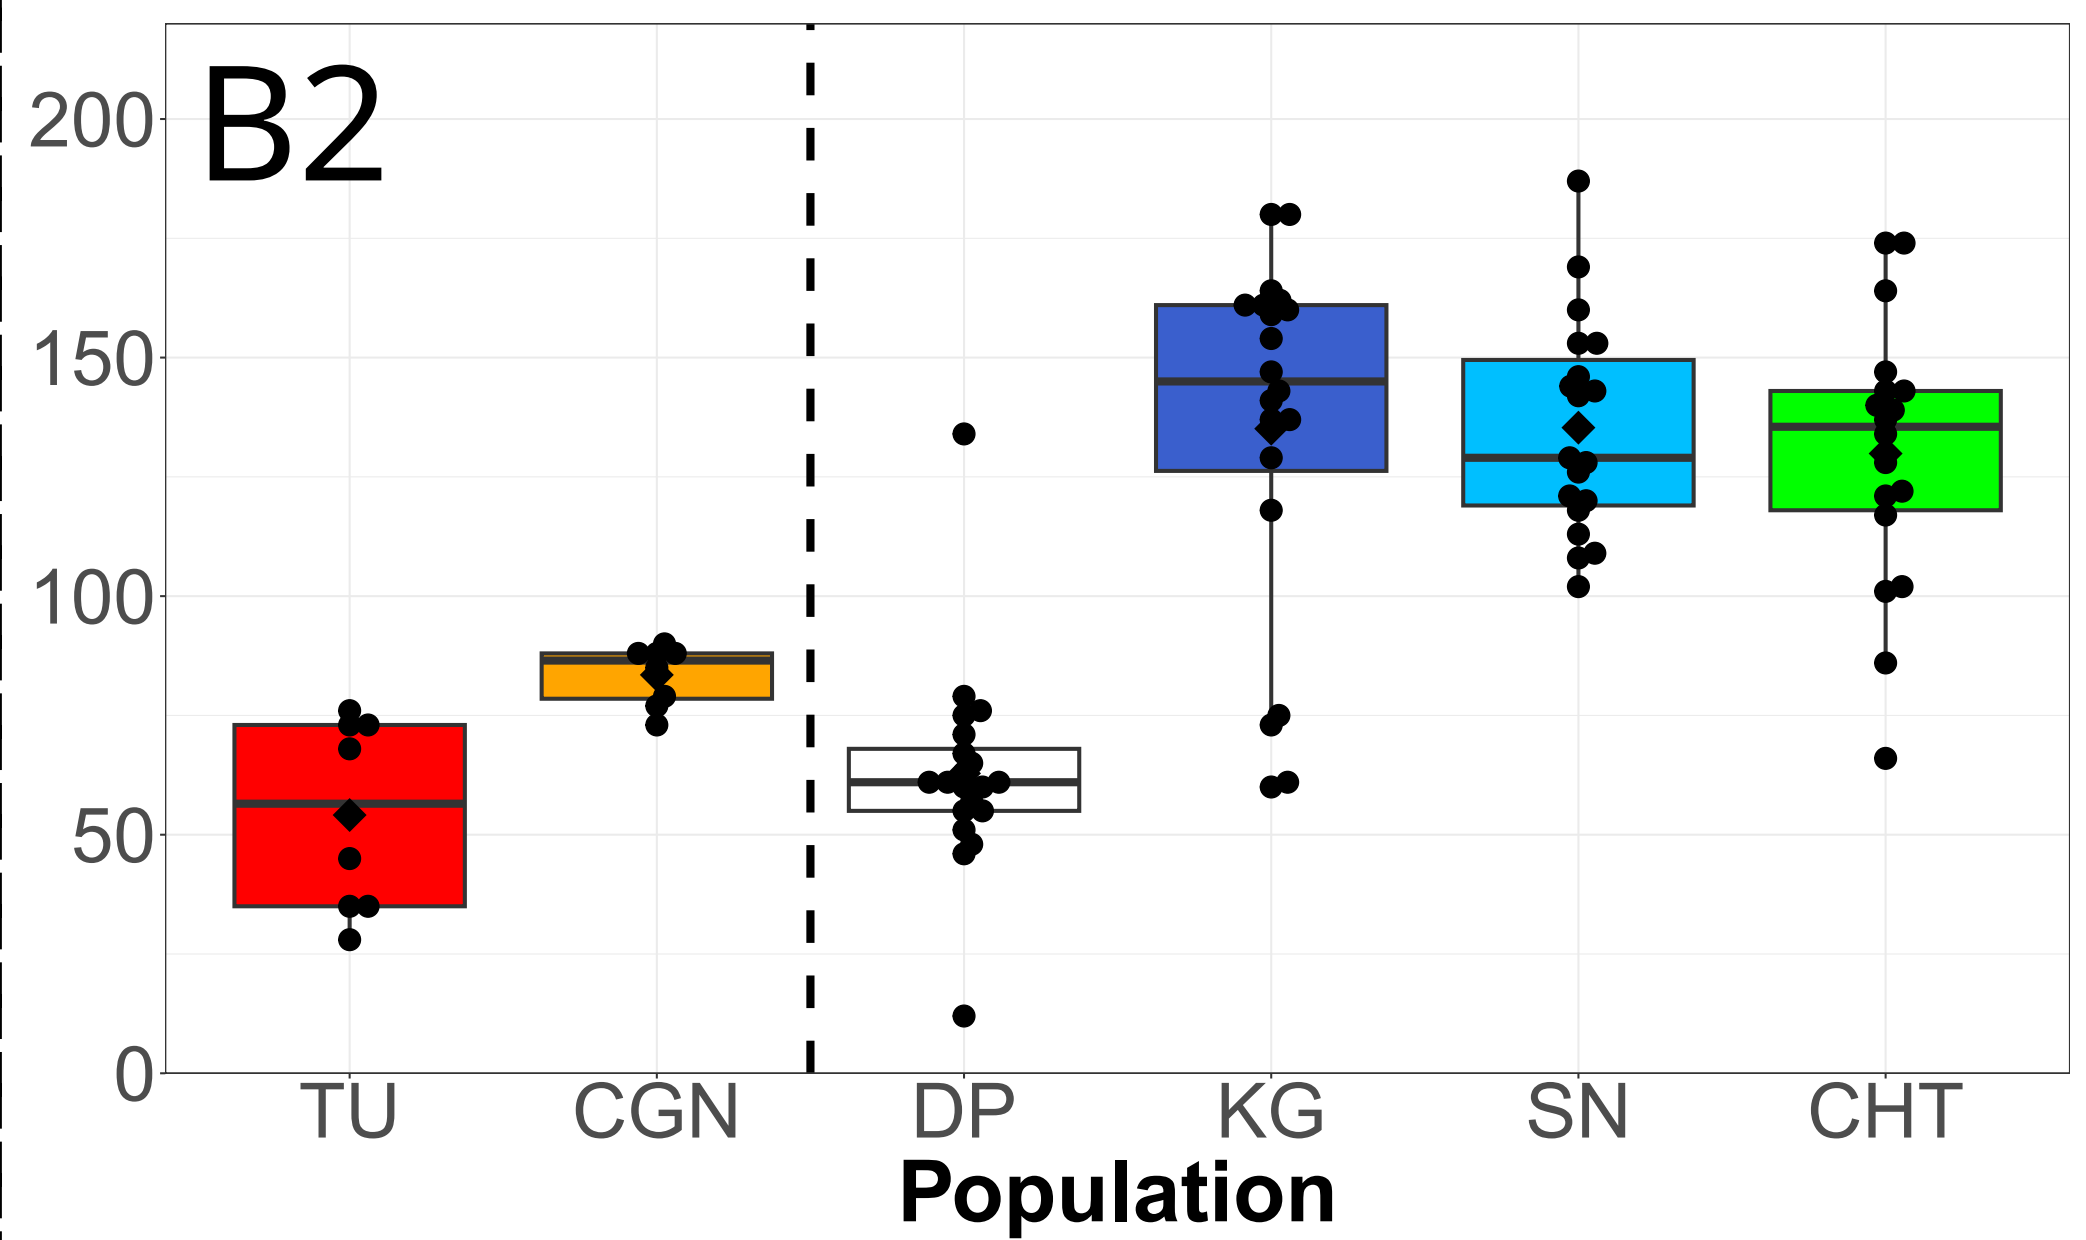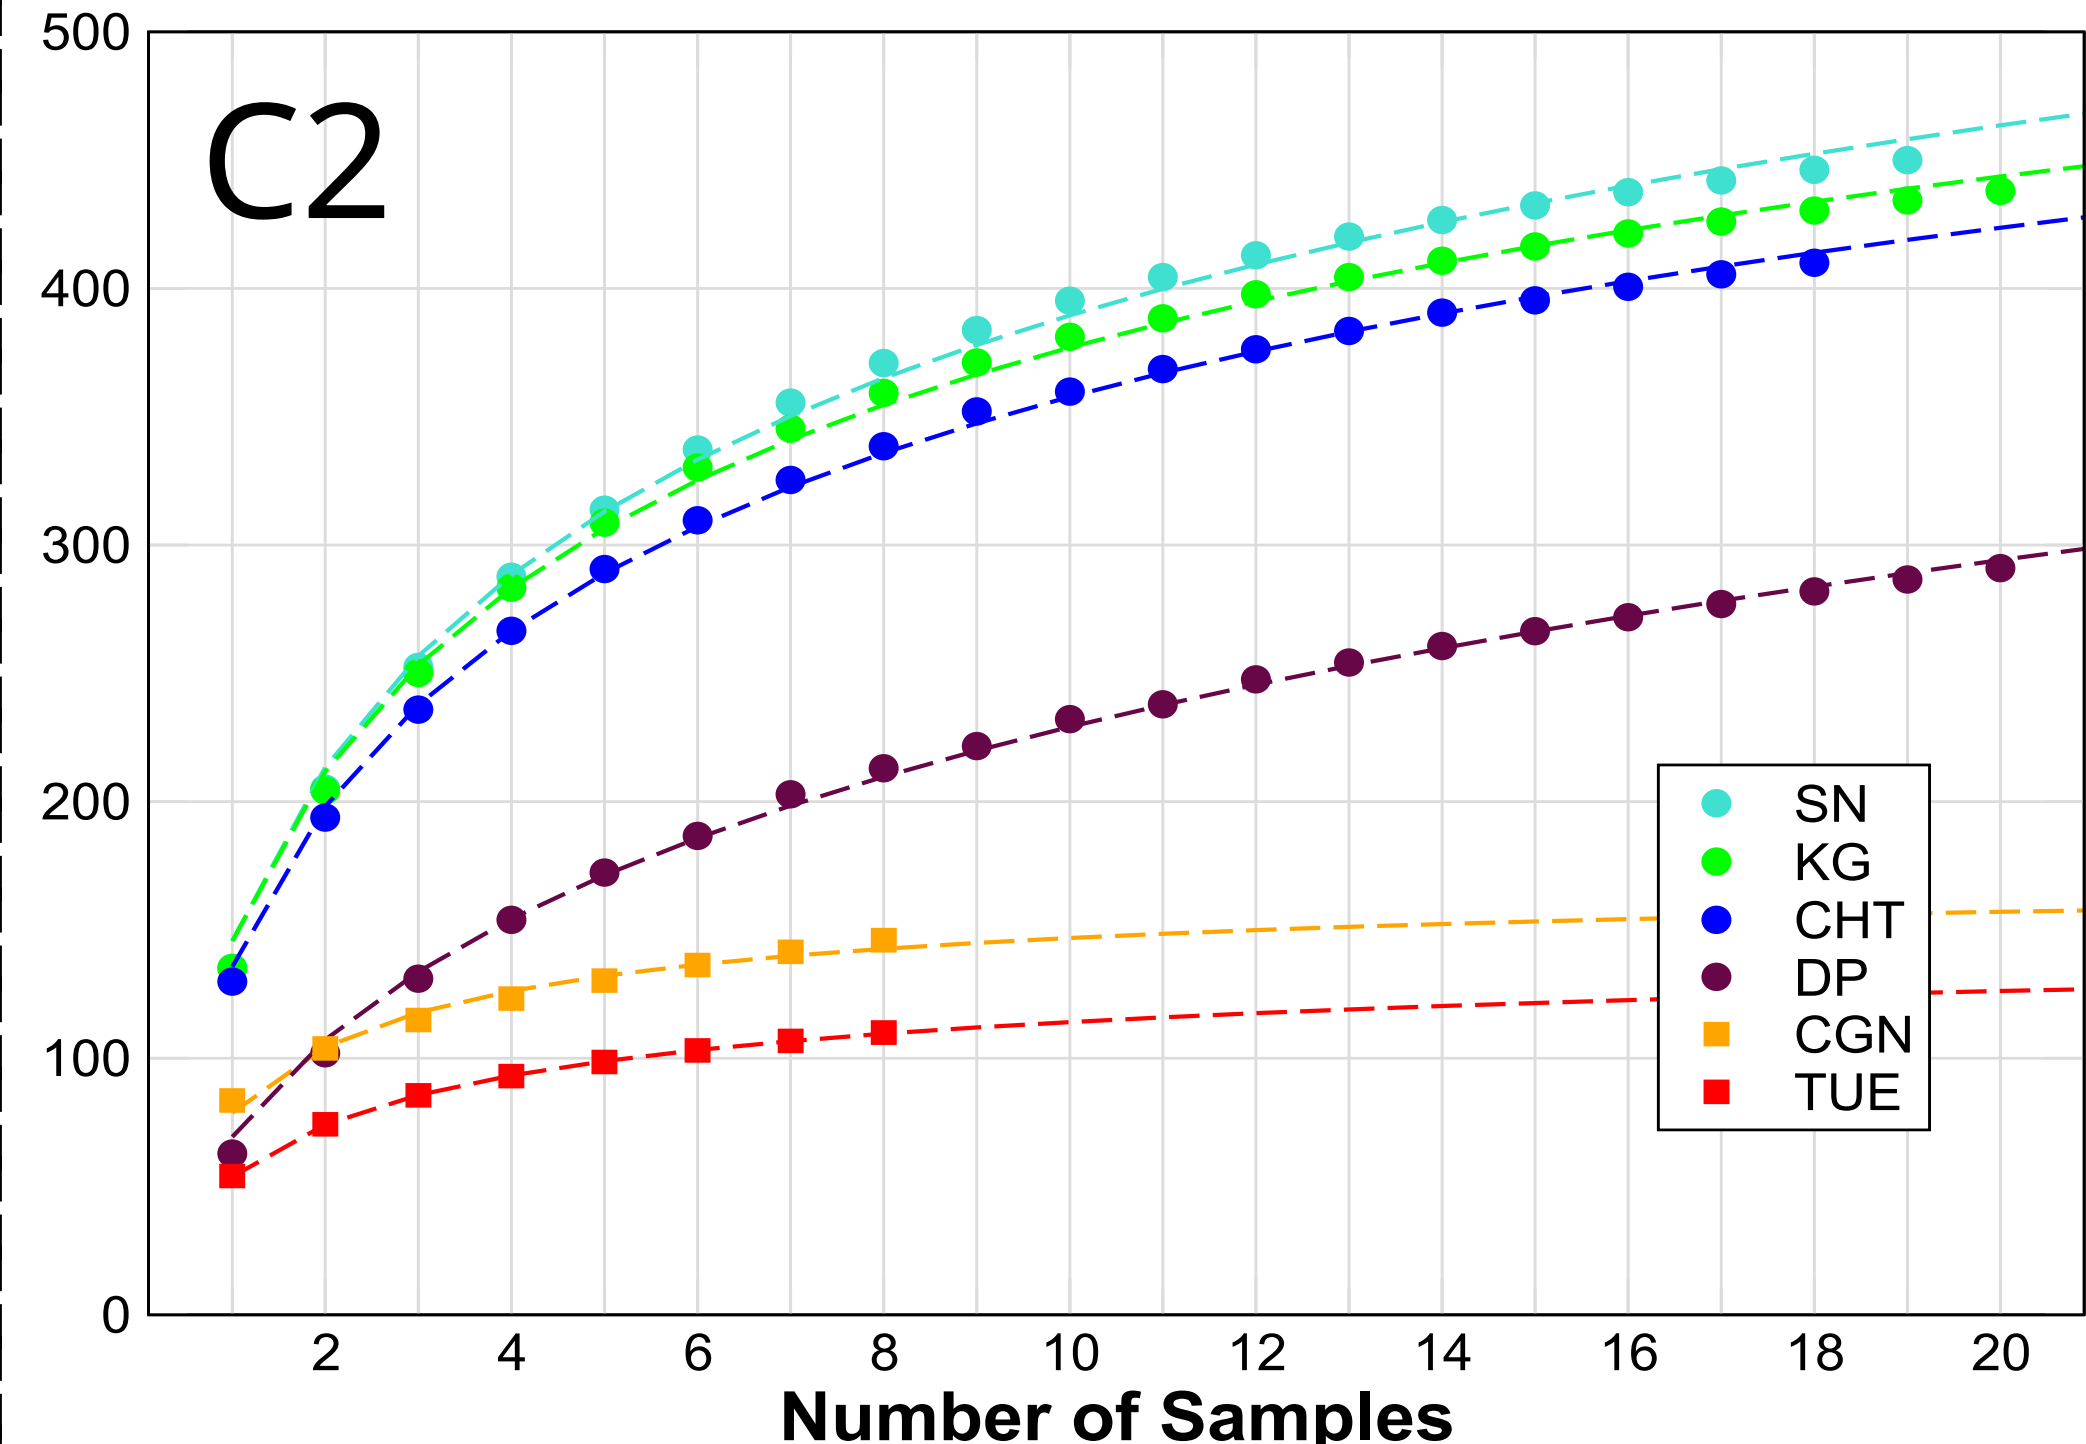

Supplement: supp [file elife-98058-supp-v1.zip]
